# Supplementary material
Source: PubMed Central journal article supplement (PMC9386760)
Supplement: sj-pdf-2-ajh-10.1177_10499091211057291.pdf [file sj-pdf-2-ajh-10.1177_10499091211057291.pdf]

## SAS ALGORITHM FOR DEMENTIA

### Supplemental Material 2. File 2: NSOC\_R1\_R5\_R7\_simple\_061521.sav

```
/*Run NSOC data format statements */

/* NSOC_Round_1_Combined_PROC_FORMAT_Statement_V3.sas */

PROC FORMAT ;
  VALUE NSOC001W
    1 = "1 MALE"
    2 = "2 FEMALE" ;

  VALUE NSOC002W
    1 = "1 SAMPLE PERSON"
    2 = "2 SPOUSE/PARTNER"
    3 = "3 DAUGHTER"
    4 = "4 SON"
    5 = "5 DAUGHTER-IN-LAW"
    6 = "6 SON-IN-LAW"
    7 = "7 STEPDAUGHTER"
    8 = "8 STEPSON"
    9 = "9 SISTER"
    10 = "10 BROTHER"
    11 = "11 SISTER-IN-LAW"
    12 = "12 BROTHER-IN-LAW"
    13 = "13 MOTHER"
    14 = "14 STEPMOTHER"
    15 = "15 MOTHER-IN-LAW"
    16 = "16 FATHER"
    17 = "17 STEPFATHER"
    18 = "18 FATHER-IN-LAW"
    19 = "19 GRANDDAUGHTER"
    20 = "20 GRANDSON"
    21 = "21 NIECE"
    22 = "22 NEPHEW"
    23 = "23 AUNT"
    24 = "24 UNCLE"
    25 = "25 COUSIN"
    26 = "26 STEPDAUGHTER'S SON/DAUGHTER"
    27 = "27 STEPSON'S SON/DAUGHTER"
    28 = "28 DAUGHTER-IN-LAW'S SON/DAUGHTER"
    29 = "29 SON-IN-LAW'S SON/DAUGHTER"
    30 = "30 BOARDER/RENTER"
    31 = "31 LIVE-IN HOUSEKEEPER/EMPLOYEE"
    32 = "32 ROOMMATE"
    33 = "33 EX-WIFE/EX-HUSBAND"
    34 = "34 BOYFRIEND/GIRLFIEND"
    35 = "35 NEIGHBOR"
    36 = "36 FRIEND"
    37 = "37 STAFF PERSON AT THE PLACE SP LIVES"
    38 = "38 CO-WORKER"
    39 = "39 MINISTER, PRIEST, OR OTHER CLERGY"
    40 = "40 PSYCHIATRIST, PSYCHOLOGIST, COUNSELOR, OR THERAPIST"
    91 = "91 OTHER RELATIVE"
    92 = "92 OTHER NONRELATIVE" ;

  VALUE NSOC003W
```

## SAS ALGORITHM FOR DEMENTIA

```
-7 = '-7 RF'
-8 = '-8 DK'
-1 = '-1 Inapplicable'
-9 = '-9 Missing'
1 = "1 YES"
2 = "2 NO" ;

/*
VALUE NSOC004W
1 = "Yes"
2 = "No" ;

VALUE NSOC005W
1 = "Yes"
2 = "No" ;

VALUE NSOC006W
1 = "Yes"
2 = "No" ;

VALUE NSOC007W
1 = "Yes"
2 = "No" ;*/

VALUE NSOC008W
1 = "1 RECORD INTERVIEW"
2 = "2 DO NOT RECORD INTERVIEW" ;

VALUE NSOC009W
1 = "1 Continue" ;

VALUE NSOC010W
-7 = '-7 RF'
-8 = '-8 DK'
-1 = '-1 Inapplicable'
-9 = '-9 Missing'
1 = "1 EVERY DAY"
2 = "2 MOST DAYS"
3 = "3 SOME DAYS"
4 = "4 RARELY"
5 = "5 NEVER" ;

VALUE NSOC011W
-7 = '-7 RF'
-8 = '-8 DK'
-1 = '-1 Inapplicable'
-9 = '-9 Missing'
1 = "1 YES"
2 = "2 NO"
7 = "7 SP DOES NOT TAKE ANY PRESCRIBED MEDICINES" ;

VALUE NSOC012W
-7 = '-7 RF'
-8 = '-8 DK'
-1 = '-1 Inapplicable'
-9 = '-9 Missing'
1 = "1 EVERY DAY"
2 = "2 MOST DAYS"
```

## SAS ALGORITHM FOR DEMENTIA

```
3 = "3 SOME DAYS"  
4 = "4 RARELY" ;
```

```
VALUE NSOC013W  
-7 = '-7 RF'  
-8 = '-8 DK'  
-1 = '-1 Inapplicable'  
-9 = '-9 Missing'  
1 = "1 WALK"  
2 = "2 DRIVE"  
3 = "3 SOMEONE DRIVES ME"  
4 = "4 TAXI"  
5 = "5 BUS"  
6 = "6 SUBWAY/TRAIN/LIGHT RAIL"  
7 = "7 TRAIN"  
8 = "8 AIRPLANE/FLY"  
91 = "91 OTHER (SPECIFY)" ;
```

```
VALUE NSOC014W  
-7 = '-7 RF'  
-8 = '-8 DK'  
-1 = '-1 Inapplicable'  
-9 = '-9 Missing'  
1 = "1 MINUTES"  
2 = "2 HOURS" ;
```

```
VALUE NSOC015W  
-7 = '-7 RF'  
-8 = '-8 DK'  
-1 = '-1 Inapplicable'  
-9 = '-9 Missing'  
1 = "1 JANUARY"  
2 = "2 FEBRUARY"  
3 = "3 MARCH"  
4 = "4 APRIL"  
5 = "5 MAY"  
6 = "6 JUNE"  
7 = "7 JULY"  
8 = "8 AUGUST"  
9 = "9 SEPTEMBER"  
10 = "10 OCTOBER"  
11 = "11 NOVEMBER"  
12 = "12 DECEMBER" ;
```

```
VALUE NSOC016W  
-7 = '-7 RF'  
-8 = '-8 DK'  
-1 = '-1 Inapplicable'  
-9 = '-9 Missing'  
1 = "1 REGULAR SCHEDULE"  
2 = "2 VARIED" ;
```

```
VALUE NSOC017W  
-7 = '-7 RF'  
-8 = '-8 DK'  
-1 = '-1 Inapplicable'  
-9 = '-9 Missing'
```

## SAS ALGORITHM FOR DEMENTIA

```
1 = "1 LESS THAN HALF"  
2 = "2 ABOUT HALF"  
3 = "3 MORE THAN HALF"  
4 = "4 NEARLY ALL" ;
```

```
VALUE NSOC018W  
-7 = '-7 RF'  
-8 = '-8 DK'  
-1 = '-1 Inapplicable'  
-9 = '-9 Missing'  
1 = "1 NUMBER OF YEARS"  
2 = "2 DATE" ;
```

```
VALUE NSOC019W  
-7 = '-7 RF'  
-8 = '-8 DK'  
-1 = '-1 Inapplicable'  
-9 = '-9 Missing'  
1 = "1 A LOT"  
2 = "2 SOME"  
3 = "3 A LITTLE"  
4 = "4 NOT AT ALL" ;
```

```
VALUE NSOC020W  
-7 = '-7 RF'  
-8 = '-8 DK'  
-1 = '-1 Inapplicable'  
-9 = '-9 Missing'  
1 = "1 VERY MUCH"  
2 = "2 SOMEWHAT"  
3 = "3 NOT SO MUCH" ;
```

```
VALUE NSOC021W  
-7 = '-7 RF'  
-8 = '-8 DK'  
-1 = '-1 Inapplicable'  
-9 = '-9 Missing'  
1 = "1 A LITTLE DIFFICULT"  
2 = "2"  
3 = "3"  
4 = "4"  
5 = "5 VERY DIFFICULT" ;
```

```
VALUE NSOC022W  
-7 = '-7 RF'  
-8 = '-8 DK'  
-1 = '-1 Inapplicable'  
-9 = '-9 Missing'  
1 = "1 VERY IMPORTANT"  
2 = "2 SOMEWHAT IMPORTANT"  
3 = "3 NOT SO IMPORTANT" ;
```

```
VALUE NSOC023W  
-7 = '-7 RF'  
-8 = '-8 DK'  
-1 = '-1 Inapplicable'  
-9 = '-9 Missing'
```

## SAS ALGORITHM FOR DEMENTIA

```
1 = "1 EXCELLENT"  
2 = "2 VERY GOOD"  
3 = "3 GOOD"  
4 = "4 FAIR"  
5 = "5 POOR" ;
```

### VALUE NSOC024W

```
1 = "1 SKIN CANCER"  
2 = "2 BREAST CANCER"  
3 = "3 PROSTATE"  
4 = "4 OTHER TYPE OF CANCER (SPECIFY)" ;
```

### VALUE NSOC025W

```
-7 = '-7 RF'  
-8 = '-8 DK'  
-1 = '-1 Inapplicable'  
-9 = '-9 Missing'  
1 = "1 NOT AT ALL"  
2 = "2 SEVERAL DAYS"  
3 = "3 MORE THAN HALF THE DAYS"  
4 = "4 NEARLY EVERY DAY" ;
```

### VALUE NSOC026W

```
-7 = '-7 RF'  
-8 = '-8 DK'  
-1 = '-1 Inapplicable'  
-9 = '-9 Missing'  
1 = "1 AGREE STRONGLY"  
2 = "2 AGREE SOMEWHAT"  
3 = "3 DISAGREE SOMEWHAT"  
4 = "4 DISAGREE STRONGLY" ;
```

### VALUE NSOC027W

```
-7 = '-7 RF'  
-8 = '-8 DK'  
-1 = '-1 Inapplicable'  
-9 = '-9 Missing'  
1 = "1 MARRIED"  
2 = "2 LIVING WITH A PARTNER"  
3 = "3 SEPARATED"  
4 = "4 DIVORCED"  
5 = "5 WIDOWED"  
6 = "6 NEVER MARRIED" ;
```

### VALUE NSOC028W

```
-7 = '-7 RF'  
-8 = '-8 DK'  
-1 = '-1 Inapplicable'  
-9 = '-9 Missing'  
1 = "1 NO SCHOOLING COMPLETED"  
2 = "2 1ST-8TH GRADE"  
3 = "3 9TH-12TH GRADE (NO DIPLOMA)"  
4 = "4 HIGH SCHOOL GRADUATE (HIGH SCHOOL DIPLOMA OR EQUIVALENT)"  
5 = "5 VOCATIONAL, TECHNICAL, BUSINESS, OR TRADE SCHOOL CERTIFICATE OR  
DIPLOMA (BEYOND HIGH SCHOOL LEVEL)"  
6 = "6 SOME COLLEGE BUT NO DEGREE"  
7 = "7 ASSOCIATE'S DEGREE"
```

## SAS ALGORITHM FOR DEMENTIA

```
8 = "8 BACHELOR'S DEGREE"  
9 = "9 MASTER'S, PROFESSIONAL, OR DOCTORAL DEGREE" ;
```

```
VALUE NSOC029W  
-7 = '-7 RF'  
-8 = '-8 DK'  
-1 = '-1 Inapplicable'  
-9 = '-9 Missing'  
1 = "1 YES"  
2 = "2 NO"  
3 = "3 RETIRED/DON'T WORK ANYMORE" ;
```

```
VALUE NSOC030W  
-7 = '-7 RF'  
-8 = '-8 DK'  
-1 = '-1 Inapplicable'  
-9 = '-9 Missing'  
1 = "1 YES, LOOKING FOR A JOB"  
2 = "2 YES, ON LAYOFF"  
3 = "3 NO"  
4 = "4 RETIRED/DON'T WORK ANYMORE" ;
```

```
VALUE NSOC031W  
-7 = '-7 RF'  
-8 = '-8 DK'  
-1 = '-1 Inapplicable'  
-9 = '-9 Missing'  
1 = "1 DAYTIME"  
2 = "2 SOME OTHER SCHEDULE" ;
```

```
VALUE NSOC032W  
-7 = '-7 RF'  
-8 = '-8 DK'  
-1 = '-1 Inapplicable'  
-9 = '-9 Missing'  
1 = "1 ENTER NUMBER OF HOURS"  
2 = "2 ENTER NUMBER OF DAYS" ;
```

```
VALUE NSOC033W  
-7 = '-7 RF'  
-8 = '-8 DK'  
-1 = '-1 Inapplicable'  
-9 = '-9 Missing'  
1 = "1 8-HOUR DAYS"  
2 = "2 SOMETHING LESS"  
3 = "3 SOMETHING MORE" ;
```

```
VALUE NSOC034W  
-7 = '-7 RF'  
-8 = '-8 DK'  
-1 = '-1 Inapplicable'  
-9 = '-9 Missing'  
1 = "1 ENTER OCCUPATION"  
2 = "2 CurrentOccupationSame"  
97 = "3 NEVER WORKED ENTIRE LIFE"  
98 = "4 HOMEMAKER/RAISED CHILDREN/WORKED IN THE HOME" ;
```

## SAS ALGORITHM FOR DEMENTIA

```
VALUE NSOC035W
  -7 = '-7 RF'
  -8 = '-8 DK'
  -1 = '-1 Inapplicable'
  -9 = '-9 Missing'
  1 = "1 MEDICARE"
  2 = "2 MEDICAID"
  3 = "3 PRIVATE HEALTH INSURANCE"
  4 = "4 TRICARE/CHAMPVA"
  91 = "91 OTHER (SPECIFY)" ;
```

```
VALUE NSOC036W
  -7 = '-7 RF'
  -8 = '-8 DK'
  -1 = '-1 Inapplicable'
  -9 = '-9 Missing'
  1 = "1 LESS THAN"
  2 = "2 MORE THAN" ;
```

```
VALUE NSOC037W
  -7 = '-7 RF'
  -8 = '-8 DK'
  -1 = '-1 Inapplicable'
  -9 = '-9 Missing'
  1 = "1 MORE THAN $1,000"
  2 = "2 LESS THAN $1,000" ;
```

```
VALUE NSOC038W
  -7 = '-7 RF'
  -8 = '-8 DK'
  -1 = '-1 Inapplicable'
  -9 = '-9 Missing'
  1 = "1 MORE THAN $500"
  2 = "2 LESS THAN $500" ;
```

```
VALUE NSOC039W
  -7 = '-7 RF'
  -8 = '-8 DK'
  -1 = '-1 Inapplicable'
  -9 = '-9 Missing'
  1 = "1 ENGLISH"
  2 = "2 SPANISH"
  91 = "91 OTHER" ;
```

```
VALUE NSOC040W
  -7 = '-7 RF'
  -8 = '-8 DK'
  -1 = '-1 Inapplicable'
  -9 = '-9 Missing'
  1 = "1 Yes" ;
```

```
VALUE RFDK
  -7 = '-7 RF'
  -8 = '-8 DK'
  -1 = '-1 Inapplicable (nursing home resident or residential care no FQ)'
  -9 = '-9 Missing';
```

## SAS ALGORITHM FOR DEMENTIA

```
VALUE RF997DK
-7 = '-7 RF'
-8 = '-8 DK'
-1 = '-1 Inapplicable'
-9 = '-9 Missing'
997 = '997 Number of hours vary each week';

VALUE RFDK_F
-7 = '-7 RF'
-8 = '-8 DK'
-1 = '-1 Inapplicable'
-9 = '-9 Missing';

VALUE RFDK_Y
1 = '1 Yes'
-7 = '-7 RF'
-8 = '-8 DK'
-1 = '-1 Inapplicable'
-9 = '-9 Missing';

VALUE RFDK_YN
1 = '1 Yes'
2 = '2 No'
-7 = '-7 RF'
-8 = '-8 DK'
-1 = '-1 Inapplicable'
-9 = '-9 Missing';

value OCC2010F /*with categories for distribution checking*/
0010-0430 = "0010-0430 Management Occupations"
0500-0950 = "0500-0950 Business and Financial Operations Occupations"
1000-1240 = "1000-1240 Computer and Mathematical Occupations"
1300-1560 = "1300-1560 Architecture and Engineering Occupations"
1600-1965 = "1600-1965 Life, Physical, and Social Science Occupations"
2000-2060 = "2000-2060 Community and Social Service Occupations"
2100-2160 = "2100-2160 Legal Occupations"
2200-2550 = "2200-2550 Education, Training, and Library Occupations"
2600-2960 = "2600-2960 Arts, Design, Entertainment, Sports, and Media
Occupations"
3000-3540 = "3000-3540 Healthcare Practitioners and Technical
Occupations"
3600-3655 = "3600-3655 Healthcare Support Occupations"
3700-3955 = "3700-3955 Protective Service Occupations"
4000-4160 = "4000-4160 Food Preparation and Serving Related
Occupations"
4200-4250 = "4200-4250 Building and Grounds Cleaning and Maintenance
Occupations"
4300-4650 = "4300-4650 Personal Care and Service Occupations"
4700-4965 = "4700-4965 Sales and Related Occupations"
5000-5940 = "5000-5940 Office and Administrative Support Occupations"
6000-6130 = "6000-6130 Farming, Fishing, and Forestry Occupations"
6200-6940 = "6200-6940 Construction and Extraction Occupations"
7000-7630 = "7000-7630 Installation, Maintenance, and Repair
Occupations"
7700-8965 = "7700-8965 Production Occupations"
9000-9750 = "9000-9750 Transportation and Material Moving Occupations"
9800-9830 = "9800-9830 Military Specific Occupations"
```



## SAS ALGORITHM FOR DEMENTIA

```
    9920 = "9920 Unemployed, with no work experience in the last 5 years
or earlier or never worked"
    -7 = '-7 RF'
    -8 = '-8 DK'
    -1 = '-1 Inapplicable'
    -9 = '-9 Missing';

value OCC20_F /*with categories for distribution checking*/
  1 = " 1 0010-0430 Management Occupations"
  2 = " 2 0500-0950 Business and Financial Operations Occupations"
  3 = " 3 1000-1240 Computer and Mathematical Occupations"
  4 = " 4 1300-1560 Architecture and Engineering Occupations"
  5 = " 5 1600-1965 Life, Physical, and Social Science Occupations"
  6 = " 6 2000-2060 Community and Social Service Occupations"
  7 = " 7 2100-2160 Legal Occupations"
  8 = " 8 2200-2550 Education, Training, and Library Occupations"
  9 = " 9 2600-2960 Arts, Design, Entertainment, Sports, and Media
Occupations"
 10 = "10 3000-3540 Healthcare Practitioners and Technical
Occupations"
 11 = "11 3600-3655 Healthcare Support Occupations"
 12 = "12 3700-3955 Protective Service Occupations"
 13 = "13 4000-4160 Food Preparation and Serving Related Occupations"
 14 = "14 4200-4250 Building and Grounds Cleaning and Maintenance
Occupations"
 15 = "15 4300-4650 Personal Care and Service Occupations"
 16 = "16 4700-4965 Sales and Related Occupations"
 17 = "17 5000-5940 Office and Administrative Support Occupations"
 18 = "18 6000-6130 Farming, Fishing, and Forestry Occupations"
 19 = "19 6200-6940 Construction and Extraction Occupations"
 20 = "20 7000-7630 Installation, Maintenance, and Repair Occupations"
 21 = "21 7700-8965 Production Occupations"
 22 = "22 9000-9750 Transportation and Material Moving Occupations"
 23 = "23 9800-9830 Military Specific Occupations"
 24 = "24 9920 Unemployed, with no work experience in the last 5 years
or earlier or never worked"
 25 = "25 Blank field"
 94 = "94 Uncodeable"
 97 = "97 Never worked entire life"
 98 = "98 Homemaker / raised children"
    -7 = '-7 RF'
    -8 = '-8 DK'
    -1 = '-1 Inapplicable'
    -9 = '-9 Missing';

value $OCCF /*with categories for distribution checking*/
  "0010"--"0430" = "0010-0430 Management Occupations"
  "0500"--"0950" = "0500-0950 Business and Financial Operations
Occupations"
  "1000"--"1240" = "1000-1240 Computer and Mathematical Occupations"
  "1300"--"1560" = "1300-1560 Architecture and Engineering Occupations"
  "1600"--"1965" = "1600-1965 Life, Physical, and Social Science
Occupations"
  "2000"--"2060" = "2000-2060 Community and Social Service Occupations"
  "2100"--"2160" = "2100-2160 Legal Occupations"
  "2200"--"2550" = "2200-2550 Education, Training, and Library
Occupations"
```

## SAS ALGORITHM FOR DEMENTIA

```
"2600"- "2960" = "2600-2960 Arts, Design, Entertainment, Sports, and
Media Occupations"
"3000"- "3540" = "3000-3540 Healthcare Practitioners and Technical
Occupations"
"3600"- "3655" = "3600-3655 Healthcare Support Occupations"
"3700"- "3955" = "3700-3955 Protective Service Occupations"
"4000"- "4160" = "4000-4160 Food Preparation and Serving Related
Occupations"
"4200"- "4250" = "4200-4250 Building and Grounds Cleaning and
Maintenance Occupations"
"4300"- "4650" = "4300-4650 Personal Care and Service Occupations"
"4700"- "4965" = "4700-4965 Sales and Related Occupations"
"5000"- "5940" = "5000-5940 Office and Administrative Support
Occupations"
"6000"- "6130" = "6000-6130 Farming, Fishing, and Forestry Occupations"
"6200"- "6940" = "6200-6940 Construction and Extraction Occupations"
"7000"- "7630" = "7000-7630 Installation, Maintenance, and Repair
Occupations"
"7700"- "8965" = "7700-8965 Production Occupations"
"9000"- "9750" = "9000-9750 Transportation and Material Moving
Occupations"
"9800"- "9830" = "9800-9830 Military Specific Occupations"
"9920" = "9920 Unemployed, with no work experience in the last 5 years
or earlier or never worked"
-7 = '-7 RF'
-8 = '-8 DK'
-1 = '-1 Inapplicable'
-9 = '-9 Missing';
```

```
value OCC_SI /*with categories for distribution checking*/
11 = '11 Agriculture, Forestry, Fishing and Hunting'
21 = '21 Mining, Quarrying, and Oil and Gas Extraction'
22 = '22 Utilities'
23 = '23 Construction'
31 = '31-33 Manufacturing'
32 = '31-33 Manufacturing'
33 = '31-33 Manufacturing'
42 = '42 Wholesale Trade'
44 = '44-45 Retail Trade'
45 = '44-45 Retail Trade'
48 = '48-49 Transportation and Warehousing'
49 = '48-49 Transportation and Warehousing'
51 = '51 Information'
52 = '52 Finance and Insurance'
53 = '53 Real Estate and Rental and Leasing'
54 = '54 Professional, Scientific, and Technical Services'
55 = '55 Management of Companies and Enterprises'
56 = '56 Administrative and Support and Waste Management and
Remediation Services'
61 = '61 Educational Services'
62 = '62 Health Care and Social Assistance'
71 = '71 Arts, Entertainment, and Recreation'
72 = '72 Accommodation and Food Services'
81 = '81 Other Services (except Public Administration)'
92 = '92 Public Administration'
94 = "94 Uncodeable"
```

## SAS ALGORITHM FOR DEMENTIA

```
          99      = '99 None'
-7 = '-7 RF'
-8 = '-8 DK'
-1 = '-1 Inapplicable'
-9 = '-9 Missing';

VALUE dnsoc
1 = '1 Eligible and interviewed'
2 = '2 Eligible and not interviewed phone number provided'
3 = '3 Eligible and not interviewed SP refused'
4 = '4 Eligible and not interviewed other'
5 = '5 Eligible and not fielded for NSOC'
6 = '6 5+ caregivers and not sampled'
7 = '7 Ineligible'
-1 = '-1 Inapplicable';

VALUE fdnsoc
1 = '1 SP NSOC Eligible'
-1 = '-1 Inapplicable';

VALUE fdintdys
1 = '1 30 days or less'
2 = '2 31-60 days'
3 = '3 61-90 days'
4 = '4 91-120 days'
5 = '5 121 days or more'
-1 = '-1 Inapplicable';

VALUE $fdTRCcd
'CO' = 'CO Complete Interview '
'IE' = 'IE Ineligible Interview'
'I2' = 'I2 Ineligible - error'
'I3' = 'I3 Ineligible - other'
'LH' = 'LH Final Language Problem - Hearing/Speech'
'LP' = 'LP Final Language Problem'
'MC' = 'MC Max Call'
'NA' = 'NA No Answer'
'ND' = 'ND Subject deceased'
'NL' = 'NL Not Locatable'
'NM' = 'NM No Answer: Answering Machine'
'NP' = 'NP Not available in Field Period'
'NS' = 'NS Subject Sick'
'NX' = 'NX Eligible, not fielded'
'RB' = 'RB Final refusal'
'RF' = 'RF Refusal - preload from SP interview'
'RP' = 'RP Final refusal - inbound call'
'OO' = 'OO Oth Out of scope- SP deceased';

VALUE inclimfa
1 = "1 Reported in NSOC I"
2 = "2 Reported in NHATS R1 (Spouse/partner of SP)"
3 = "3 Imputed in NSOC I"
4 = "4 Imputed in NHATS R1 (Spouse/partner of SP)" ;

RUN;
```

## SAS ALGORITHM FOR DEMENTIA

```
/*=====*/  
/* NSOC_Round_5_Combined_PROC_FORMAT_Statement_V4.sas */  
  
PROC FORMAT;  
  VALUE $RFDK_F  
    '-7' = '-7 RF'  
    '-8' = '-8 DK'  
    '-1' = '-1 Inapplicable'  
    '-9' = '-9 Missing';  
  VALUE RFDK_F  
    -7 = '-7 RF'  
    -8 = '-8 DK'  
    -1 = '-1 Inapplicable'  
    -9 = '-9 Missing';  
  VALUE RFDK_Y  
    1 = ' 1 Yes'  
    -7 = '-7 RF'  
    -8 = '-8 DK'  
    -1 = '-1 Inapplicable'  
    -9 = '-9 Missing';  
  VALUE W000001W  
    1 = "1 MALE"  
    2 = "2 FEMALE"  
    -7 = '-7 RF'  
    -8 = '-8 DK'  
    -1 = '-1 Inapplicable'  
    -9 = '-9 Missing';  
  VALUE W000002W  
    1 = "1 SAMPLE PERSON"  
    2 = "2 SPOUSE/PARTNER"  
    3 = "3 DAUGHTER"  
    4 = "4 SON"  
    5 = "5 DAUGHTER-IN-LAW"  
    6 = "6 SON-IN-LAW"  
    7 = "7 STEPDAUGHTER"  
    8 = "8 STEPSON"  
    9 = "9 SISTER"  
    10 = "10 BROTHER"  
    11 = "11 SISTER-IN-LAW"  
    12 = "12 BROTHER-IN-LAW"  
    13 = "13 MOTHER"  
    14 = "14 STEPMOTHER"  
    15 = "15 MOTHER-IN-LAW"  
    16 = "16 FATHER"  
    17 = "17 STEPFATHER"  
    18 = "18 FATHER-IN-LAW"  
    19 = "19 GRANDDAUGHTER"  
    20 = "20 GRANDSON"  
    21 = "21 NIECE"  
    22 = "22 NEPHEW"  
    23 = "23 AUNT"  
    24 = "24 UNCLE"  
    25 = "25 COUSIN"  
    26 = "26 STEPDAUGHTER'S SON/DAUGHTER"  
    27 = "27 STEPSON'S SON/DAUGHTER"  
    28 = "28 DAUGHTER-IN-LAW'S SON/DAUGHTER"
```

## SAS ALGORITHM FOR DEMENTIA

```
29 = "29 SON-IN-LAW'S SON/DAUGHTER"
30 = "30 BOARDER/RENTER"
31 = "31 LIVE-IN HOUSEKEEPER/EMPLOYEE"
32 = "32 ROOMMATE"
33 = "33 EX-WIFE/EX-HUSBAND"
34 = "34 BOYFRIEND/GIRLFIEND"
35 = "35 NEIGHBOR"
36 = "36 FRIEND"
37 = "37 STAFF PERSON AT THE PLACE SP LIVES"
38 = "38 CO-WORKER"
39 = "39 MINISTER, PRIEST, OR OTHER CLERGY"
40 = "40 PSYCHIATRIST, PSYCHOLOGIST, COUNSELOR, OR THERAPIST"
91 = "91 OTHER RELATIVE"
92 = "92 OTHER NONRELATIVE"
-7 = '-7 RF'
-8 = '-8 DK'
-1 = '-1 Inapplicable'
-9 = '-9 Missing';
VALUE W000003W
  1 = "1 White, non-Hispanic"
  2 = "2 Black, non-Hispanic"
  3 = "3 Other (Am Indian/Asian/Native Hawaiian/Pacific Islander/other
specify), non-Hispanic"
  4 = "4 Hispanic"
  5 = "5 More than one and DKRF primary"
  6 = "6 DKRF";
VALUE W000004W
  1 = "1 YES"
  2 = "2 NO"
-7 = '-7 RF'
-8 = '-8 DK'
-1 = '-1 Inapplicable'
-9 = '-9 Missing';
VALUE W000006W
  1 = "1 30 days or less"
  2 = "2 31-60 days"
  3 = "3 61-90 days"
  4 = "4 91-120 days"
  5 = "5 121 days or more"
-1 = "-1 Inapplicable";
VALUE W000007W
  1 = "1 WHITE or CAUCASIAN"
  2 = "2 BLACK or AFRICAN AMERICAN"
  3 = "3 AMERICAN INDIAN or ALASKA NATIVE"
  4 = "4 ASIAN"
  5 = "5 NATIVE HAWAIIAN or OTHER PACIFIC ISLANDER"
/*6 = "6 DO NOT HAVE A PRIMARY RACE"*/
-7 = '-7 RF'
-8 = '-8 DK'
-1 = '-1 Inapplicable'
-9 = '-9 Missing';
VALUE W000008W
  1 = "1 SP NSOC Eligible"
-1 = '-1 Inapplicable';
VALUE W000009W
  1 = "1 Eligible and interviewed"
  2 = "2 Eligible and not interviewed phone number provided"
```

## SAS ALGORITHM FOR DEMENTIA

```
3 = "3 Eligible and not interviewed SP refused"
4 = "4 Eligible and not interviewed other"
5 = "5 Eligible and not fielded for NSOC"
6 = "5+ caregivers and not sampled"
7 = "7 Ineligible"
-1 = "-1 Inapplicable";
VALUE W000011W
  997 = "997 NUMBER OF HOURS VARY EACH WEEK"
  -7 = '-7 RF'
  -8 = '-8 DK'
  -1 = '-1 Inapplicable'
  -9 = '-9 Missing';
VALUE W000012W
  1 = "1 EVERY DAY"
  2 = "2 MOST DAYS"
  3 = "3 SOME DAYS"
  4 = "4 RARELY"
  5 = "5 NEVER"
  -7 = '-7 RF'
  -8 = '-8 DK'
  -1 = '-1 Inapplicable'
  -9 = '-9 Missing';
VALUE W000013W
  1 = "1 YES"
  2 = "2 NO"
  7 = "7 SP DOES NOT TAKE ANY PRESCRIBED MEDICINES"
  -7 = '-7 RF'
  -8 = '-8 DK'
  -1 = '-1 Inapplicable'
  -9 = '-9 Missing';
VALUE W000014W
  1 = "1 EVERY DAY"
  2 = "2 MOST DAYS"
  3 = "3 SOME DAYS"
  4 = "4 RARELY"
  -7 = '-7 RF'
  -8 = '-8 DK'
  -1 = '-1 Inapplicable'
  -9 = '-9 Missing';
VALUE W000015W
  1 = "1 A LOT"
  2 = "2 SOMEWHAT"
  3 = "3 A LITTLE"
  4 = "4 NOT AT ALL"
  -7 = '-7 RF'
  -8 = '-8 DK'
  -1 = '-1 Inapplicable'
  -9 = '-9 Missing';
VALUE W000016W
  1 = "1 WALK"
  2 = "2 DRIVE"
  3 = "3 SOMEONE DRIVES ME"
  4 = "4 TAXI"
  5 = "5 BUS"
  6 = "6 SUBWAY/TRAIN/LIGHT RAIL"
  7 = "7 TRAIN"
  8 = "8 AIRPLANE/FLY"
```

## SAS ALGORITHM FOR DEMENTIA

```
91 = "91 OTHER (SPECIFY)"
-7 = '-7 RF'
-8 = '-8 DK'
-1 = '-1 Inapplicable'
-9 = '-9 Missing';
VALUE W000017W
1 = "1 MINUTES"
2 = "2 HOURS"
-7 = '-7 RF'
-8 = '-8 DK'
-1 = '-1 Inapplicable'
-9 = '-9 Missing';
VALUE W000018W
1 = "1 JANUARY"
2 = "2 FEBRUARY"
3 = "3 MARCH"
4 = "4 APRIL"
5 = "5 MAY"
6 = "6 JUNE"
7 = "7 JULY"
8 = "8 AUGUST"
9 = "9 SEPTEMBER"
10 = "10 OCTOBER"
11 = "11 NOVEMBER"
12 = "12 DECEMBER"
-7 = '-7 RF'
-8 = '-8 DK'
-1 = '-1 Inapplicable'
-9 = '-9 Missing';
VALUE W000019W
1 = "1 REGULAR SCHEDULE"
2 = "2 VARIED"
-7 = '-7 RF'
-8 = '-8 DK'
-1 = '-1 Inapplicable'
-9 = '-9 Missing';
VALUE W000020W
1 = "1 LESS THAN HALF"
2 = "2 ABOUT HALF"
3 = "3 MORE THAN HALF"
4 = "4 NEARLY ALL"
-7 = '-7 RF'
-8 = '-8 DK'
-1 = '-1 Inapplicable'
-9 = '-9 Missing';
VALUE W000021W
1 = "1 NUMBER OF YEARS"
2 = "2 DATE"
-7 = '-7 RF'
-8 = '-8 DK'
-1 = '-1 Inapplicable'
-9 = '-9 Missing';
VALUE W000022W
1 = "1 A LOT"
2 = "2 SOME"
3 = "3 A LITTLE"
4 = "4 NOT AT ALL"
```

## SAS ALGORITHM FOR DEMENTIA

```
-7 = '-7 RF'  
-8 = '-8 DK'  
-1 = '-1 Inapplicable'  
-9 = '-9 Missing';  
VALUE W000023W  
1 = "1 VERY MUCH"  
2 = "2 SOMEWHAT"  
3 = "3 NOT SO MUCH"  
-7 = '-7 RF'  
-8 = '-8 DK'  
-1 = '-1 Inapplicable'  
-9 = '-9 Missing';  
VALUE W000024W  
1 = "1 A LITTLE DIFFICULT"  
2 = "2 "  
3 = "3 "  
4 = "4 "  
5 = "5 VERY DIFFICULT"  
-7 = '-7 RF'  
-8 = '-8 DK'  
-1 = '-1 Inapplicable'  
-9 = '-9 Missing';  
VALUE W000025W  
1 = "1 MORE THAN FAIR SHARE"  
2 = "2 LESS THAN FAIR SHARE"  
3 = "3 FAIR AMOUNT"  
-7 = '-7 RF'  
-8 = '-8 DK'  
-1 = '-1 Inapplicable'  
-9 = '-9 Missing';  
VALUE W000026W  
1 = "1 VERY IMPORTANT"  
2 = "2 SOMEWHAT IMPORTANT"  
3 = "3 NOT SO IMPORTANT"  
-7 = '-7 RF'  
-8 = '-8 DK'  
-1 = '-1 Inapplicable'  
-9 = '-9 Missing';  
VALUE W000027W  
1 = "1 EXCELLENT"  
2 = "2 VERY GOOD"  
3 = "3 GOOD"  
4 = "4 FAIR"  
5 = "5 POOR"  
-7 = '-7 RF'  
-8 = '-8 DK'  
-1 = '-1 Inapplicable'  
-9 = '-9 Missing';  
VALUE W000028W  
1 = "1 SKIN CANCER"  
2 = "2 BREAST CANCER"  
3 = "3 ^PROSTATE"  
4 = "4 OTHER TYPE OF CANCER (SPECIFY)"  
-7 = '-7 RF'  
-8 = '-8 DK'  
-1 = '-1 Inapplicable'  
-9 = '-9 Missing';
```



## SAS ALGORITHM FOR DEMENTIA

```
VALUE W000029W
  1 = "1 EVERY NIGHT"
  2 = "2 MOST NIGHTS"
  3 = "3 SOME NIGHTS"
  4 = "4 RARELY"
  5 = "5 NEVER"
  -7 = '-7 RF'
  -8 = '-8 DK'
  -1 = '-1 Inapplicable'
  -9 = '-9 Missing';
VALUE W000030W
  1 = "1 NOT AT ALL"
  2 = "2 SEVERAL DAYS"
  3 = "3 MORE THAN HALF THE DAYS"
  4 = "4 NEARLY EVERY DAY"
  -7 = '-7 RF'
  -8 = '-8 DK'
  -1 = '-1 Inapplicable'
  -9 = '-9 Missing';
VALUE W000031W
  1 = "1 AGREE STRONGLY"
  2 = "2 AGREE SOMEWHAT"
  3 = "3 DISAGREE SOMEWHAT"
  4 = "4 DISAGREE STRONGLY"
  -7 = '-7 RF'
  -8 = '-8 DK'
  -1 = '-1 Inapplicable'
  -9 = '-9 Missing';
VALUE W000032W
  1 = "1 MARRIED"
  2 = "2 LIVING WITH A PARTNER"
  3 = "3 SEPARATED"
  4 = "4 DIVORCED"
  5 = "5 WIDOWED"
  6 = "6 NEVER MARRIED"
  -7 = '-7 RF'
  -8 = '-8 DK'
  -1 = '-1 Inapplicable'
  -9 = '-9 Missing';
VALUE W000033W
  1 = "1 NO SCHOOLING COMPLETED"
  2 = "2 1ST-8TH GRADE"
  3 = "3 9TH-12TH GRADE (NO DIPLOMA)"
  4 = "4 HIGH SCHOOL GRADUATE (HIGH SCHOOL DIPLOMA OR EQUIVALENT)"
  5 = "5 VOCATIONAL, TECHNICAL, BUSINESS, OR TRADE SCHOOL CERTIFICATE OR
DIPLOMA (BEYOND HIGH SCHOOL LEVEL)"
  6 = "6 SOME COLLEGE BUT NO DEGREE"
  7 = "7 ASSOCIATE'S DEGREE"
  8 = "8 BACHELOR'S DEGREE"
  9 = "9 MASTER'S, PROFESSIONAL, OR DOCTORAL DEGREE"
  -7 = '-7 RF'
  -8 = '-8 DK'
  -1 = '-1 Inapplicable'
  -9 = '-9 Missing';
VALUE W000034W
  1 = "1 YES"
  2 = "2 NO"
```

## SAS ALGORITHM FOR DEMENTIA

```
3 = "3 RETIRED/DON'T WORK ANYMORE"
-7 = '-7 RF'
-8 = '-8 DK'
-1 = '-1 Inapplicable'
-9 = '-9 Missing';
VALUE W000035W
1 = "1 YES, LOOKING FOR A JOB"
2 = "2 YES, ON LAYOFF"
3 = "3 NO"
4 = "4 RETIRED/DON'T WORK ANYMORE"
-7 = '-7 RF'
-8 = '-8 DK'
-1 = '-1 Inapplicable'
-9 = '-9 Missing';
VALUE W000036W
1 = "1 DAYTIME"
2 = "2 SOME OTHER SCHEDULE"
-7 = '-7 RF'
-8 = '-8 DK'
-1 = '-1 Inapplicable'
-9 = '-9 Missing';
VALUE W000037W
1 = "1 ENTER NUMBER OF HOURS"
2 = "2 ENTER NUMBER OF DAYS"
-7 = '-7 RF'
-8 = '-8 DK'
-1 = '-1 Inapplicable'
-9 = '-9 Missing';
VALUE W000038W
1 = "1 8-HOUR DAYS"
2 = "2 SOMETHING LESS"
3 = "3 SOMETHING MORE"
-7 = '-7 RF'
-8 = '-8 DK'
-1 = '-1 Inapplicable'
-9 = '-9 Missing';
VALUE W000039W
1 = "1 ENTER OCCUPATION"
2 = "2 ^CurrentOccupationSame"
97 = "97 NEVER WORKED ENTIRE LIFE"
98 = "98 HOMEMAKER/RAISED CHILDREN/WORKED IN THE HOME"
-7 = '-7 RF'
-8 = '-8 DK'
-1 = '-1 Inapplicable'
-9 = '-9 Missing';
VALUE W000040W
1 = "1 MEDICARE"
2 = "2 MEDICAID"
3 = "3 PRIVATE HEALTH INSURANCE"
4 = "4 TRICARE/CHAMPVA"
91 = "91 OTHER (SPECIFY)"
-7 = '-7 RF'
-8 = '-8 DK'
-1 = '-1 Inapplicable'
-9 = '-9 Missing';
VALUE W000041W
1 = "1 LESS THAN"
```

## SAS ALGORITHM FOR DEMENTIA

```
2 = "2 MORE THAN"
-7 = '-7 RF'
-8 = '-8 DK'
-1 = '-1 Inapplicable'
-9 = '-9 Missing';
VALUE W000042W
1 = "1 MORE THAN $1,000"
2 = "2 LESS THAN $1,000"
-7 = '-7 RF'
-8 = '-8 DK'
-1 = '-1 Inapplicable'
-9 = '-9 Missing';
VALUE W000043W
1 = "1 MORE THAN $500"
2 = "2 LESS THAN $500"
-7 = '-7 RF'
-8 = '-8 DK'
-1 = '-1 Inapplicable'
-9 = '-9 Missing';
VALUE OCC_CODE
1 = '1 Management Occupations: 0010-0430'
2 = '2 Business and Financial Operations Occupations: 0500-0950'
3 = '3 Computer and mathematical occupations: 1000-1240'
4 = '4 Architecture and Engineering Occupations: 1300-1560'
5 = '5 Life, Physical, and Social Science Occupations: 1600-1965'
6 = '6 Community and Social Service Occupations: 2000-2060'
7 = '7 Legal Occupations: 2100-2160'
8 = '8 Education, Training, and Library Occupations: 2200-2550'
9 = '9 Arts, Design, Entertainment, Sports, and Media Occupations: 2600-
2960'
10 = '10 Healthcare Practitioners and Technical Occupations: 3000-3540'
11 = '11 Healthcare Support Occupations: 3600-3655'
12 = '12 Protective Service Occupations: 3700-3955'
13 = '13 Food Preparation and Serving Related Occupations: 4000-4160'
14 = '14 Building and Grounds Cleaning and Maintenance Occupations: 4200-
4250'
15 = '15 Personal Care and Service Occupations: 4300-4650'
16 = '16 Sales and Related Occupations: 4700-4965'
17 = '17 Office and Administrative Support Occupations: 5000-5940'
18 = '18 Farming, Fishing, and Forestry Occupations: 6000-6130'
19 = '19 Construction and Extraction Occupations: 6200-6940'
20 = '20 Installation, Maintenance, and Repair Occupations: 7000-7630'
21 = '21 Production Occupations: 7700-8965'
22 = '22 Transportation and Material Moving Occupations: 9000-9750'
23 = '23 Military Specific Occupations: 9800-9830'
24 = '24 No current occ (Unemployed, no work in the last 5 years, never
worked): 9920'
25 = '25 Blank field'
26 = '26 Code did not match'
94 = '94 Uncodable'
95 = '95 Never Worked Entire Life'
96 = '96 Homemaker/Raised Children'
-7 = '-7 RF'
-8 = '-8 DK'
-1 = '-1 Inapplicable'
-9 = '-9 Missing';
value OCC_SI /*with categories for distribution checking*/
```

## SAS ALGORITHM FOR DEMENTIA

```
11 = '11 Agriculture, Forestry, Fishing and Hunting'
21 = '21 Mining, Quarrying, and Oil and Gas Extraction'
22 = '22 Utilities'
23 = '23 Construction'
31 = '31-33 Manufacturing'
32 = '31-33 Manufacturing'
33 = '31-33 Manufacturing'
42 = '42 Wholesale Trade'
44 = '44-45 Retail Trade'
45 = '44-45 Retail Trade'
48 = '48-49 Transportation and Warehousing'
49 = '48-49 Transportation and Warehousing'
51 = '51 Information'
52 = '52 Finance and Insurance'
53 = '53 Real Estate and Rental and Leasing'
54 = '54 Professional, Scientific, and Technical Services'
55 = '55 Management of Companies and Enterprises'
56 = '56 Administrative and Support and Waste Management and
Remediation Services'
61 = '61 Educational Services'
62 = '62 Health Care and Social Assistance'
71 = '71 Arts, Entertainment, and Recreation'
72 = '72 Accommodation and Food Services'
81 = '81 Other Services (except Public Administration)'
92 = '92 Public Administration'
94 = "94 Uncodeable"
99 = '99 None'
-7 = '-7 RF'
-8 = '-8 DK'
-1 = '-1 Inapplicable'
-9 = '-9 Missing';
value Source /* from derived variable specifications...updated 11/30/18
*/
1 = '1 2017 NSOC'
2 = '2 2015 NSOC - phone interview'
3 = '3 2015 NSOC - mailing'
4 = '4 2015 NHATS'
5 = '5 No source'
-7 = '-7 RF'
-8 = '-8 DK'
-1 = '-1 Inapplicable'
-9 = '-9 Missing';

VALUE inc5imfa
1 ="1 Reported in NSOC II"
2 ="2 Reported in NHATS R5 (Spouse/partner of SP)"
3 ="3 Imputed in NSOC II"
4 ="4 Imputed in NHATS R5 (Spouse/partner of SP)";

RUN;

/*=====*/

/* NSOC_R7_Crss_Combined_PROC_FORMAT_Statement_V2.sas */

options extendobscounter=no nofmterr;
```

## SAS ALGORITHM FOR DEMENTIA

**PROC FORMAT;**

VALUE \$RFDK\_F

'-7' = '-7 RF'  
'-8' = '-8 DK'  
'-1' = '-1 Inapplicable'  
'-9' = '-9 Missing'

;

VALUE RFDK\_F

-2 = '-2 Helped last month, SP alive'  
-3 = '-3 Helped last month of life, SP deceased'  
-4 = '-4 Did not help last month or in last month of life'  
-7 = '-7 RF'  
-8 = '-8 DK'  
-1 = '-1 Inapplicable'  
-9 = '-9 Missing'

;

VALUE RFDK\_S

997 = '997 Hours vary each week'  
-2 = '-2 Helped last month, SP alive'  
-3 = '-3 Helped last month of life, SP deceased'  
-4 = '-4 Did not help last month or in last month of life'  
-7 = '-7 RF'  
-8 = '-8 DK'  
-1 = '-1 Inapplicable'  
-9 = '-9 Missing'

;

VALUE RFDK\_Y

1 = '1 Yes'  
-7 = '-7 RF'  
-8 = '-8 DK'  
-1 = '-1 Inapplicable'  
-9 = '-9 Missing'

;

VALUE W000001W

1 = "1 YES"  
2 = "2 NO"  
-2 = '-2 Helped last month, SP alive'  
-3 = '-3 Helped last month of life, SP deceased'  
-4 = '-4 Did not help last month or in last month of life'  
-7 = '-7 RF'  
-8 = '-8 DK'  
-1 = '-1 Inapplicable'  
-9 = '-9 Missing'

;

VALUE W000002W

1 = "1 MALE"  
2 = "2 FEMALE"  
-2 = '-2 Helped last month, SP alive'  
-3 = '-3 Helped last month of life, SP deceased'  
-4 = '-4 Did not help last month or in last month of life'  
-7 = '-7 RF'  
-8 = '-8 DK'  
-1 = '-1 Inapplicable'

## SAS ALGORITHM FOR DEMENTIA

```
-9 = '-9 Missing'  
;  
VALUE W000003W  
1 = "1 SAMPLE PERSON"  
2 = "2 SPOUSE/PARTNER"  
3 = "3 DAUGHTER"  
4 = "4 SON"  
5 = "5 DAUGHTER-IN-LAW"  
6 = "6 SON-IN-LAW"  
7 = "7 STEPDAUGHTER"  
8 = "8 STEPSON"  
9 = "9 SISTER"  
10 = "10 BROTHER"  
11 = "11 SISTER-IN-LAW"  
12 = "12 BROTHER-IN-LAW"  
13 = "13 MOTHER"  
14 = "14 STEPMOTHER"  
15 = "15 MOTHER-IN-LAW"  
16 = "16 FATHER"  
17 = "17 STEPFATHER"  
18 = "18 FATHER-IN-LAW"  
19 = "19 GRANDDAUGHTER"  
20 = "20 GRANDSON"  
21 = "21 NIECE"  
22 = "22 NEPHEW"  
23 = "23 AUNT"  
24 = "24 UNCLE"  
25 = "25 COUSIN"  
26 = "26 STEPDAUGHTER'S SON/DAUGHTER"  
27 = "27 STEPSON'S SON/DAUGHTER"  
28 = "28 DAUGHTER-IN-LAW'S SON/DAUGHTER"  
29 = "29 SON-IN-LAW'S SON/DAUGHTER"  
30 = "30 BOARDER/RENTER"  
31 = "31 LIVE-IN HOUSEKEEPER/EMPLOYEE"  
32 = "32 ROOMMATE"  
33 = "33 EX-WIFE/EX-HUSBAND"  
34 = "34 BOYFRIEND/GIRLFIEND"  
35 = "35 NEIGHBOR"  
36 = "36 FRIEND"  
37 = "37 STAFF PERSON AT THE PLACE SP LIVES"  
38 = "38 CO-WORKER"  
39 = "39 MINISTER, PRIEST, OR OTHER CLERGY"  
40 = "40 PSYCHIATRIST, PSYCHOLOGIST, COUNSELOR, OR THERAPIST"  
91 = "91 OTHER RELATIVE"  
92 = "92 OTHER NONRELATIVE"  
-2 = '-2 Helped last month, SP alive'  
-3 = '-3 Helped last month of life, SP deceased'  
-4 = '-4 Did not help last month or in last month of life'  
-7 = '-7 RF'  
-8 = '-8 DK'  
-1 = '-1 Inapplicable'  
-9 = '-9 Missing'  
;
```

## SAS ALGORITHM FOR DEMENTIA

```
VALUE W000004W
  1 = "1 White, non-Hispanic"
  2 = "2 Black, non-Hispanic"
  3 = "3 Other (Am Indian/Asian/Native Hawaiian/Pacific Islander/other
specify), non-Hispanic"
  4 = "4 Hispanic"
  5 = "5 More than one and DKRF primary"
  6 = "6 DKRF"
  -2 = '-2 Helped last month, SP alive'
  -3 = '-3 Helped last month of life, SP deceased'
  -4 = '-4 Did not help last month or in last month of life'
  -7 = '-7 RF'
  -8 = '-8 DK'
  -1 = '-1 Inapplicable'
  -9 = '-9 Missing'
;
VALUE W000005W
  1='1 Yes - Breakoff'
  -2 = '-2 Helped last month, SP alive'
  -3 = '-3 Helped last month of life, SP deceased'
  -4 = '-4 Did not help last month or in last month of life'
  -7 = '-7 RF'
  -8 = '-8 DK'
  -1 = '-1 Inapplicable'
  -9 = '-9 Missing'
;
VALUE W000006W
  1 = '1 30 days or less'
  2 = '2 31-60 days'
  3 = '3 61-90 days'
  4 = '4 91-120 days'
  5 = '5 121 days or more'
  -2 = '-2 Helped last month, SP alive'
  -3 = '-3 Helped last month of life, SP deceased'
  -4 = '-4 Did not help last month or in last month of life'
  -7 = '-7 RF'
  -8 = '-8 DK'
  -1 = '-1 Inapplicable'
  -9 = '-9 Missing'
;
VALUE W000013W
  1 = "1 YES"
  2 = "2 NO"
  7 = "7 SP DOES NOT TAKE ANY PRESCRIBED MEDICINES"
  -2 = '-2 Helped last month, SP alive'
  -3 = '-3 Helped last month of life, SP deceased'
  -4 = '-4 Did not help last month or in last month of life'
  -7 = '-7 RF'
  -8 = '-8 DK'
  -1 = '-1 Inapplicable'
  -9 = '-9 Missing'
;
VALUE W000014W
  2 = "2 Helped last month, SP alive"
  3 = "3 Helped last month of life, SP deceased"
  4 = "4 Did not help last month or in last month of life"
  -2 = '-2 Helped last month, SP alive'
```

## SAS ALGORITHM FOR DEMENTIA

```
-3 = '-3 Helped last month of life, SP deceased'  
-4 = '-4 Did not help last month or in last month of life'  
-7 = '-7 RF'  
-8 = '-8 DK'  
-1 = '-1 Inapplicable'  
-9 = '-9 Missing'  
;  
VALUE W000017W  
  1 = "1 EVERY DAY"  
  2 = "2 MOST DAYS"  
  3 = "3 SOME DAYS"  
  4 = "4 RARELY"  
  5 = "5 NEVER"  
-2 = '-2 Helped last month, SP alive'  
-3 = '-3 Helped last month of life, SP deceased'  
-4 = '-4 Did not help last month or in last month of life'  
-7 = '-7 RF'  
-8 = '-8 DK'  
-1 = '-1 Inapplicable'  
-9 = '-9 Missing'  
;  
VALUE W000018W  
  1 = "1 JANUARY"  
  2 = "2 FEBRUARY"  
  3 = "3 MARCH"  
  4 = "4 APRIL"  
  5 = "5 MAY"  
  6 = "6 JUNE"  
  7 = "7 JULY"  
  8 = "8 AUGUST"  
  9 = "9 SEPTEMBER"  
 10 = "10 OCTOBER"  
 11 = "11 NOVEMBER"  
 12 = "12 DECEMBER"  
-2 = '-2 Helped last month, SP alive'  
-3 = '-3 Helped last month of life, SP deceased'  
-4 = '-4 Did not help last month or in last month of life'  
-7 = '-7 RF'  
-8 = '-8 DK'  
-1 = '-1 Inapplicable'  
-9 = '-9 Missing';  
VALUE W000019W  
  1 = "1 EVERY DAY"  
  2 = "2 MOST DAYS"  
  3 = "3 SOME DAYS"  
  4 = "4 RARELY"  
-2 = '-2 Helped last month, SP alive'  
-3 = '-3 Helped last month of life, SP deceased'  
-4 = '-4 Did not help last month or in last month of life'  
-7 = '-7 RF'  
-8 = '-8 DK'  
-1 = '-1 Inapplicable'  
-9 = '-9 Missing'  
;
```



## SAS ALGORITHM FOR DEMENTIA

```
VALUE W000020W
  1 = "1 YES"
  2 = "2 NO OR NOT ENOUGH"
  -2 = '-2 Helped last month, SP alive'
  -3 = '-3 Helped last month of life, SP deceased'
  -4 = '-4 Did not help last month or in last month of life'
  -7 = '-7 RF'
  -8 = '-8 DK'
  -1 = '-1 Inapplicable'
  -9 = '-9 Missing'
;

VALUE W000021W
  1 = "1 REGULAR SCHEDULE"
  2 = "2 VARIED"
  -2 = '-2 Helped last month, SP alive'
  -3 = '-3 Helped last month of life, SP deceased'
  -4 = '-4 Did not help last month or in last month of life'
  -7 = '-7 RF'
  -8 = '-8 DK'
  -1 = '-1 Inapplicable'
  -9 = '-9 Missing'
;

VALUE W000022W
  1 = "1 LESS THAN HALF"
  2 = "2 ABOUT HALF"
  3 = "3 MORE THAN HALF"
  4 = "4 NEARLY ALL"
  -2 = '-2 Helped last month, SP alive'
  -3 = '-3 Helped last month of life, SP deceased'
  -4 = '-4 Did not help last month or in last month of life'
  -7 = '-7 RF'
  -8 = '-8 DK'
  -1 = '-1 Inapplicable'
  -9 = '-9 Missing'
;

VALUE W000023W
  1 = "1 NUMBER OF YEARS"
  2 = "2 DATE"
  -2 = '-2 Helped last month, SP alive'
  -3 = '-3 Helped last month of life, SP deceased'
  -4 = '-4 Did not help last month or in last month of life'
  -7 = '-7 RF'
  -8 = '-8 DK'
  -1 = '-1 Inapplicable'
  -9 = '-9 Missing'
;

VALUE W000024W
  1 = "1 A LOT"
  2 = "2 SOME"
  3 = "3 A LITTLE"
  4 = "4 NOT AT ALL"
  -2 = '-2 Helped last month, SP alive'
  -3 = '-3 Helped last month of life, SP deceased'
```

## SAS ALGORITHM FOR DEMENTIA

```
-4 = '-4 Did not help last month or in last month of life'  
-7 = '-7 RF'  
-8 = '-8 DK'  
-1 = '-1 Inapplicable'  
-9 = '-9 Missing'
```

;

VALUE W000025W

```
1 = "1 VERY MUCH"  
2 = "2 SOMEWHAT"  
3 = "3 NOT SO MUCH"  
-2 = '-2 Helped last month, SP alive'  
-3 = '-3 Helped last month of life, SP deceased'  
-4 = '-4 Did not help last month or in last month of life'  
-7 = '-7 RF'  
-8 = '-8 DK'  
-1 = '-1 Inapplicable'  
-9 = '-9 Missing'
```

;

VALUE W000026W

```
1 = "1 A LITTLE DIFFICULT"  
2 = "2 "  
3 = "3 "  
4 = "4 "  
5 = "5 VERY DIFFICULT"  
-2 = '-2 Helped last month, SP alive'  
-3 = '-3 Helped last month of life, SP deceased'  
-4 = '-4 Did not help last month or in last month of life'  
-7 = '-7 RF'  
-8 = '-8 DK'  
-1 = '-1 Inapplicable'  
-9 = '-9 Missing'
```

;

VALUE W000027W

```
1 = "1 VERY DIFFICULT"  
2 = "2 SOMEWHAT DIFFICULT"  
3 = "3 A LITTLE DIFFICULT"  
4 = "4 NOT AT ALL DIFFICULT"  
-2 = '-2 Helped last month, SP alive'  
-3 = '-3 Helped last month of life, SP deceased'  
-4 = '-4 Did not help last month or in last month of life'  
-7 = '-7 RF'  
-8 = '-8 DK'  
-1 = '-1 Inapplicable'  
-9 = '-9 Missing'
```

;

VALUE W000028W

```
1 = "1 MORE THAN FAIR SHARE"  
2 = "2 LESS THAN FAIR SHARE"  
3 = "3 FAIR AMOUNT"  
-2 = '-2 Helped last month, SP alive'  
-3 = '-3 Helped last month of life, SP deceased'  
-4 = '-4 Did not help last month or in last month of life'  
-7 = '-7 RF'
```

## SAS ALGORITHM FOR DEMENTIA

```
-8 = '-8 DK'
-1 = '-1 Inapplicable'
-9 = '-9 Missing'
;
VALUE W000029W
  1 = "1 YES"
  2 = "2 NO OR NOT ENOUGH"
  3 = "3 DOES NOT APPLY"
  -2 = '-2 Helped last month, SP alive'
  -3 = '-3 Helped last month of life, SP deceased'
  -4 = '-4 Did not help last month or in last month of life'
  -7 = '-7 RF'
  -8 = '-8 DK'
  -1 = '-1 Inapplicable'
  -9 = '-9 Missing'
;
VALUE W000030W
  1 = "1 ALWAYS"
  2 = "2 USUALLY"
  3 = "3 SOMETIMES"
  4 = "4 NEVER"
  5 = "5 DOES NOT APPLY"
  -2 = '-2 Helped last month, SP alive'
  -3 = '-3 Helped last month of life, SP deceased'
  -4 = '-4 Did not help last month or in last month of life'
  -7 = '-7 RF'
  -8 = '-8 DK'
  -1 = '-1 Inapplicable'
  -9 = '-9 Missing'
;
VALUE W000031W
  1 = "1 OFTEN"
  2 = "2 SOMETIMES"
  3 = "3 RARELY"
  -2 = '-2 Helped last month, SP alive'
  -3 = '-3 Helped last month of life, SP deceased'
  -4 = '-4 Did not help last month or in last month of life'
  -7 = '-7 RF'
  -8 = '-8 DK'
  -1 = '-1 Inapplicable'
  -9 = '-9 Missing'
;
VALUE W000032W
  1 = "1 A LOT"
  2 = "2 SOMEWHAT"
  3 = "3 A LITTLE"
  4 = "4 NOT AT ALL"
  -2 = '-2 Helped last month, SP alive'
  -3 = '-3 Helped last month of life, SP deceased'
  -4 = '-4 Did not help last month or in last month of life'
  -7 = '-7 RF'
  -8 = '-8 DK'
  -1 = '-1 Inapplicable'
  -9 = '-9 Missing'
```

## SAS ALGORITHM FOR DEMENTIA

;

VALUE W000033W

1 = "1 USUAL PROVIDER "  
2 = "2 SOMEONE ELSE"  
-2 = '-2 Helped last month, SP alive'  
-3 = '-3 Helped last month of life, SP deceased'  
-4 = '-4 Did not help last month or in last month of life'  
-7 = '-7 RF'  
-8 = '-8 DK'  
-1 = '-1 Inapplicable'  
-9 = '-9 Missing'

;

VALUE W000034W

1 = "1 ALWAYS"  
2 = "2 USUALLY"  
3 = "3 SOMETIMES"  
4 = "4 NEVER"  
-2 = '-2 Helped last month, SP alive'  
-3 = '-3 Helped last month of life, SP deceased'  
-4 = '-4 Did not help last month or in last month of life'  
-7 = '-7 RF'  
-8 = '-8 DK'  
-1 = '-1 Inapplicable'  
-9 = '-9 Missing'

;

VALUE W000035W

1 = "1 SP'S HOME"  
2 = "2 ANOTHER FACILITY"  
3 = "3 RESPONDENT'S HOME"  
91 = "91 ANOTHER PLACE (SPECIFY)"  
-2 = '-2 Helped last month, SP alive'  
-3 = '-3 Helped last month of life, SP deceased'  
-4 = '-4 Did not help last month or in last month of life'  
-7 = '-7 RF'  
-8 = '-8 DK'  
-1 = '-1 Inapplicable'  
-9 = '-9 Missing'

;

VALUE W000036W

1 = "1 WALK/WALKED"  
2 = "2 DRIVE/DROVE"  
3 = "3 SOMEONE DRIVES/DROVE ME"  
4 = "4 TAXI/UBER/LYFT"  
5 = "5 BUS"  
6 = "6 SUBWAY/LIGHTRAIL"  
7 = "7 TRAIN"  
8 = "8 AIRPLANE/FLY/FLEW"  
91 = "91 OTHER (SPECIFY)"  
-2 = '-2 Helped last month, SP alive'  
-3 = '-3 Helped last month of life, SP deceased'  
-4 = '-4 Did not help last month or in last month of life'  
-7 = '-7 RF'  
-8 = '-8 DK'

## SAS ALGORITHM FOR DEMENTIA

```
-1 = '-1 Inapplicable'  
-9 = '-9 Missing'  
;  
  
VALUE W000037W  
  1 = "1 MINUTES"  
  2 = "2 HOURS"  
-2 = '-2 Helped last month, SP alive'  
-3 = '-3 Helped last month of life, SP deceased'  
-4 = '-4 Did not help last month or in last month of life'  
-7 = '-7 RF'  
-8 = '-8 DK'  
-1 = '-1 Inapplicable'  
-9 = '-9 Missing'  
;  
  
VALUE W000038W  
  1 = "1 VERY IMPORTANT"  
  2 = "2 SOMEWHAT IMPORTANT"  
  3 = "3 NOT SO IMPORTANT"  
-2 = '-2 Helped last month, SP alive'  
-3 = '-3 Helped last month of life, SP deceased'  
-4 = '-4 Did not help last month or in last month of life'  
-7 = '-7 RF'  
-8 = '-8 DK'  
-1 = '-1 Inapplicable'  
-9 = '-9 Missing'  
;  
  
VALUE W000039W  
  1 = "1 EXCELLENT"  
  2 = "2 VERY GOOD"  
  3 = "3 GOOD"  
  4 = "4 FAIR"  
  5 = "5 POOR"  
-2 = '-2 Helped last month, SP alive'  
-3 = '-3 Helped last month of life, SP deceased'  
-4 = '-4 Did not help last month or in last month of life'  
-7 = '-7 RF'  
-8 = '-8 DK'  
-1 = '-1 Inapplicable'  
-9 = '-9 Missing'  
;  
  
VALUE W000041W  
  1 = "1 EVERY NIGHT"  
  2 = "2 MOST NIGHTS"  
  3 = "3 SOME NIGHTS"  
  4 = "4 RARELY"  
  5 = "5 NEVER"  
-2 = '-2 Helped last month, SP alive'  
-3 = '-3 Helped last month of life, SP deceased'  
-4 = '-4 Did not help last month or in last month of life'  
-7 = '-7 RF'  
-8 = '-8 DK'  
-1 = '-1 Inapplicable'  
-9 = '-9 Missing'
```

## SAS ALGORITHM FOR DEMENTIA

;

VALUE W000042W

1 = "1 NOT AT ALL"  
2 = "2 SEVERAL DAYS"  
3 = "3 MORE THAN HALF THE DAYS"  
4 = "4 NEARLY EVERY DAY"  
-2 = '-2 Helped last month, SP alive'  
-3 = '-3 Helped last month of life, SP deceased'  
-4 = '-4 Did not help last month or in last month of life'  
-7 = '-7 RF'  
-8 = '-8 DK'  
-1 = '-1 Inapplicable'  
-9 = '-9 Missing'

;

VALUE W000043W

1 = "1 AGREE STRONGLY"  
2 = "2 AGREE SOMEWHAT"  
3 = "3 DISAGREE SOMEWHAT"  
4 = "4 DISAGREE STRONGLY"  
-2 = '-2 Helped last month, SP alive'  
-3 = '-3 Helped last month of life, SP deceased'  
-4 = '-4 Did not help last month or in last month of life'  
-7 = '-7 RF'  
-8 = '-8 DK'  
-1 = '-1 Inapplicable'  
-9 = '-9 Missing'

;

VALUE W000044W

1 = "1 MARRIED"  
2 = "2 LIVING WITH A PARTNER"  
3 = "3 SEPARATED"  
4 = "4 DIVORCED"  
5 = "5 WIDOWED"  
6 = "6 NEVER MARRIED"  
-2 = '-2 Helped last month, SP alive'  
-3 = '-3 Helped last month of life, SP deceased'  
-4 = '-4 Did not help last month or in last month of life'  
-7 = '-7 RF'  
-8 = '-8 DK'  
-1 = '-1 Inapplicable'  
-9 = '-9 Missing'

;

VALUE W000045W

1 = "1 NO SCHOOLING COMPLETED"  
2 = "2 1ST-8TH GRADE"  
3 = "3 9TH-12TH GRADE (NO DIPLOMA)"  
4 = "4 HIGH SCHOOL GRADUATE (HIGH SCHOOL DIPLOMA OR EQUIVALENT)"  
5 = "5 VOCATIONAL, TECHNICAL, BUSINESS, OR TRADE SCHOOL CERTIFICATE OR DIPLOMA (BEYOND HIGH SCHOOL LEVEL)"

## SAS ALGORITHM FOR DEMENTIA

```
6 = "6 SOME COLLEGE BUT NO DEGREE"  
7 = "7 ASSOCIATE'S DEGREE"  
8 = "8 BACHELOR'S DEGREE"  
9 = "9 MASTER'S, PROFESSIONAL, OR DOCTORAL DEGREE"  
-2 = '-2 Helped last month, SP alive'  
-3 = '-3 Helped last month of life, SP deceased'  
-4 = '-4 Did not help last month or in last month of life'  
-7 = '-7 RF'  
-8 = '-8 DK'  
-1 = '-1 Inapplicable'  
-9 = '-9 Missing'
```

;

```
VALUE W000046W
```

```
1 = "1 WHITE/CAUCASIAN"  
2 = "2 BLACK/AFRICAN AMERICAN"  
3 = "3 AMERICAN INDIAN/ALASKA NATIVE"  
4 = "4 ASIAN"  
5 = "5 NATIVE HAWAIIAN/PACIFIC ISLANDER"  
-2 = '-2 Helped last month, SP alive'  
-3 = '-3 Helped last month of life, SP deceased'  
-4 = '-4 Did not help last month or in last month of life'  
-7 = '-7 RF'  
-8 = '-8 DK'  
-1 = '-1 Inapplicable'  
-9 = '-9 Missing'
```

;

```
VALUE W000047W
```

```
1 = "1 YES"  
2 = "2 NO"  
3 = "3 RETIRED/DON'T WORK ANYMORE"  
-2 = '-2 Helped last month, SP alive'  
-3 = '-3 Helped last month of life, SP deceased'  
-4 = '-4 Did not help last month or in last month of life'  
-7 = '-7 RF'  
-8 = '-8 DK'  
-1 = '-1 Inapplicable'  
-9 = '-9 Missing'
```

;

```
VALUE W000048W
```

```
1 = "1 YES, LOOKING FOR A JOB"  
2 = "2 YES, ON LAYOFF"  
3 = "3 NO"  
4 = "4 RETIRED/DON'T WORK ANYMORE"  
-2 = '-2 Helped last month, SP alive'  
-3 = '-3 Helped last month of life, SP deceased'  
-4 = '-4 Did not help last month or in last month of life'  
-7 = '-7 RF'  
-8 = '-8 DK'  
-1 = '-1 Inapplicable'  
-9 = '-9 Missing'
```

## SAS ALGORITHM FOR DEMENTIA

;

VALUE W000049W

1 = "1 DAYTIME"  
2 = "2 SOME OTHER SCHEDULE"  
-2 = '-2 Helped last month, SP alive'  
-3 = '-3 Helped last month of life, SP deceased'  
-4 = '-4 Did not help last month or in last month of life'  
-7 = '-7 RF'  
-8 = '-8 DK'  
-1 = '-1 Inapplicable'  
-9 = '-9 Missing'

;

VALUE W000050W

1 = "1 ENTER NUMBER OF HOURS"  
2 = "2 ENTER NUMBER OF DAYS"  
-2 = '-2 Helped last month, SP alive'  
-3 = '-3 Helped last month of life, SP deceased'  
-4 = '-4 Did not help last month or in last month of life'  
-7 = '-7 RF'  
-8 = '-8 DK'  
-1 = '-1 Inapplicable'  
-9 = '-9 Missing'

;

VALUE W000051W

1 = "1 8-HOUR DAYS"  
2 = "2 SOMETHING LESS"  
3 = "3 SOMETHING MORE"  
-2 = '-2 Helped last month, SP alive'  
-3 = '-3 Helped last month of life, SP deceased'  
-4 = '-4 Did not help last month or in last month of life'  
-7 = '-7 RF'  
-8 = '-8 DK'  
-1 = '-1 Inapplicable'  
-9 = '-9 Missing'

;

VALUE W000052W

1 = "1 ENTER OCCUPATION"  
2 = "2 CURRENT OCCUPATION SAME"  
97 = "97 NEVER WORKED ENTIRE LIFE"  
98 = "98 HOMEMAKER/RAISED CHILDREN/WORKED IN THE HOME"  
-2 = '-2 Helped last month, SP alive'  
-3 = '-3 Helped last month of life, SP deceased'  
-4 = '-4 Did not help last month or in last month of life'  
-7 = '-7 RF'  
-8 = '-8 DK'  
-1 = '-1 Inapplicable'  
-9 = '-9 Missing'

;



## SAS ALGORITHM FOR DEMENTIA

```
VALUE W000053W
  1 = "1 MEDICARE"
  2 = "2 MEDICAID"
  3 = "3 PRIVATE HEALTH INSURANCE"
  4 = "4 TRICARE/CHAMPVA"
  91 = "91 OTHER (SPECIFY)"
  -2 = '-2 Helped last month, SP alive'
  -3 = '-3 Helped last month of life, SP deceased'
  -4 = '-4 Did not help last month or in last month of life'
  -7 = '-7 RF'
  -8 = '-8 DK'
  -1 = '-1 Inapplicable'
  -9 = '-9 Missing'
```

;

```
VALUE W000054W
  1 = "1 LESS THAN"
  2 = "2 MORE THAN"
  -2 = '-2 Helped last month, SP alive'
  -3 = '-3 Helped last month of life, SP deceased'
  -4 = '-4 Did not help last month or in last month of life'
  -7 = '-7 RF'
  -8 = '-8 DK'
  -1 = '-1 Inapplicable'
  -9 = '-9 Missing'
```

;

```
VALUE W000055W
  1 = "1 MORE THAN $1,000"
  2 = "2 LESS THAN $1,000"
  -2 = '-2 Helped last month, SP alive'
  -3 = '-3 Helped last month of life, SP deceased'
  -4 = '-4 Did not help last month or in last month of life'
  -7 = '-7 RF'
  -8 = '-8 DK'
  -1 = '-1 Inapplicable'
  -9 = '-9 Missing'
```

;

```
VALUE W000056W
  1 = "1 MORE THAN $500"
  2 = "2 LESS THAN $500"
  -2 = '-2 Helped last month, SP alive'
  -3 = '-3 Helped last month of life, SP deceased'
  -4 = '-4 Did not help last month or in last month of life'
  -7 = '-7 RF'
  -8 = '-8 DK'
  -1 = '-1 Inapplicable'
  -9 = '-9 Missing'
```

;

```
VALUE W000057W
  1 = '1 SP interview at 2017 NHATS & alive at NSOC'
  2 = '2 SP 2016 LML'
  3 = '3 SP 2017 LML'
```

## SAS ALGORITHM FOR DEMENTIA

```
    4 = '4 SP interview at 2017 & deceased at NSOC'  
    5 = '5 SP interview at 2017 & more than 1 caregiver & at least 1  
caregiver reports SP deceased at NSOC'  
    -7 = '-7 RF'  
    -8 = '-8 DK'  
    -1 = '-1 Inapplicable'  
    -9 = '-9 Missing'  
;  
VALUE W000059W  
    1 = '1 CG eligible for cross-sectional sample '  
    -7 = '-7 RF'  
    -8 = '-8 DK'  
    -1 = '-1 Inapplicable'  
    -9 = '-9 Missing'  
;  
VALUE W000058W  
    1 = '1 SP has eligible caregiver'  
    -7 = '-7 RF'  
    -8 = '-8 DK'  
    -1 = '-1 Inapplicable'  
    -9 = '-9 Missing'  
;  
VALUE W000060W  
    1 = '1 Eligible and interviewed'  
    2 = '2 Eligible and not interviewed phone number provided'  
    3 = '3 Eligible and not interviewed SP refused'  
    4 = '4 Eligible and not interviewed other'  
    5 = '5 eligible and not fielded for NSOC not present in R5 or R7'  
    6 = '6 >5 caregivers and not sampled'  
    7 = '7 Named by SP but Ineligible'  
    -7 = '-7 RF'  
    -8 = '-8 DK'  
    -1 = '-1 Inapplicable'  
    -9 = '-9 Missing'  
;  
VALUE W000061W  
    1 = '1 Helper eligible for cross-sectional NSOC'  
    -1 = '-1 Inapplicable'  
;  
VALUE W000062W  
    1 = '1 NSOC Interview Complete'  
    -1 = '-1 Inapplicable'  
;  
VALUE W000063W  
    1 = '1 OP named as helper in NHATS interview'  
    -1 = '-1 Inapplicable'  
;  
VALUE W000064W  
    1 = '1 SP eligible for cross-sectional NSOC'  
    -1 = '-1 Ineligible'  
;  
VALUE OCC_CODE  
    1 = '1 Management Occupations: 0010-0430'  
    2 = '2 Business and Financial Operations Occupations: 0500-0950'  
    3 = '3 Computer and mathematical occupations: 1000-1240'  
    4 = '4 Architecture and Engineering Occupations: 1300-1560'  
    5 = '5 Life, Physical, and Social Science Occupations: 1600-1965'
```

## SAS ALGORITHM FOR DEMENTIA

```
6  ='6 Community and Social Service Occupations:  2000-2060'  
7  ='7 Legal Occupations:  2100-2160'  
8  ='8 Education, Training, and Library Occupations:  2200-2550'  
9  ='9 Arts, Design, Entertainment, Sports, and Media Occupations: 2600-  
2960'  
10 ='10 Healthcare Practitioners and Technical Occupations:  3000-3540'  
11 ='11 Healthcare Support Occupations:  3600-3655'  
12 ='12 Protective Service Occupations:  3700-3955'  
13 ='13 Food Preparation and Serving Related Occupations:  4000-4160'  
14 ='14 Building and Grounds Cleaning and Maintenance Occupations: 4200-  
4250'  
15 ='15 Personal Care and Service Occupations: 4300-4650'  
16 ='16 Sales and Related Occupations: 4700-4965'  
17 ='17 Office and Administrative Support Occupations: 5000-5940'  
18 ='18 Farming, Fishing, and Forestry Occupations:  6000-6130'  
19 ='19 Construction and Extraction Occupations:  6200-6940'  
20 ='20 Installation, Maintenance, and Repair Occupations: 7000-7630'  
21 ='21 Production Occupations:  7700-8965'  
22 ='22 Transportation and Material Moving Occupations:  9000-9750'  
23 ='23 Military Specific Occupations: 9800-9830'  
24 ='24 No current occ (Unemployed, no work in the last 5 years, never  
worked):  9920'  
25 = '25 Blank field'  
26 = '26 Code did not match'  
94 = '94 Uncodable'  
95 = '95 Never Worked Entire Life'  
96 = '96 Homemaker/Raised Children'  
-2 = '-2 Helped last month, SP alive'  
-3 = '-3 Helped last month of life, SP deceased'  
-4 = '-4 Did not help last month or in last month of life'  
-7 = '-7 RF'  
-8 = '-8 DK'  
-1 = '-1 Inapplicable'  
-9 = '-9 Missing'  
;  
  
value OCC_SI /*with categories for distribution checking*/  
11 = '11 Agriculture, Forestry, Fishing and Hunting'  
21 = '21 Mining, Quarrying, and Oil and Gas Extraction'  
22 = '22 Utilities'  
23 = '23 Construction'  
31 = '31-33 Manufacturing'  
32 = '31-33 Manufacturing'  
33 = '31-33 Manufacturing'  
42 = '42 Wholesale Trade'  
44 = '44-45 Retail Trade'  
45 = '44-45 Retail Trade'  
48 = '48-49 Transportation and Warehousing'  
49 = '48-49 Transportation and Warehousing'  
51 = '51 Information'  
52 = '52 Finance and Insurance'  
53 = '53 Real Estate and Rental and Leasing'  
54 = '54 Professional, Scientific, and Technical Services'  
55 = '55 Management of Companies and Enterprises'  
56 = '56 Administrative and Support and Waste Management and Remediation  
Services'  
61 = '61 Educational Services'
```

## SAS ALGORITHM FOR DEMENTIA

```
62 = '62 Health Care and Social Assistance'  
71 = '71 Arts, Entertainment, and Recreation'  
72 = '72 Accommodation and Food Services'  
81 = '81 Other Services (except Public Administration)'  
92 = '92 Public Administration'  
94 = "94 Uncodeable"  
99 = '99 None'  
-2 = '-2 Helped last month, SP alive'  
-3 = '-3 Helped last month of life, SP deceased'  
-4 = '-4 Did not help last month or in last month of life'  
-7 = '-7 RF'  
-8 = '-8 DK'  
-1 = '-1 Inapplicable'  
-9 = '-9 Missing' ;  
VALUE inc7imfa  
  -4 = "-4 Did not help last month or in last month of life"  
  1 = "1 Reported in NSOC III"  
  2 = "2 Reported in NHATS R7 (Spouse/partner of SP)"  
  3 = "3 Imputed in NSOC III"  
  4 = "4 Imputed in NHATS R7 (Spouse/partner of SP)" ;  
RUN;
```

```
/* Import NSOC data sets*/
```

```
%LET filepath10=C:\UB\Projects\2019\Suzanne Sullivan\NHATS project\Sensitive  
Data Files\Round 1\NHATS Round 1 NSOC Files\SAS;  
%LET filepath11=C:\UB\Projects\2019\Suzanne Sullivan\NHATS project\Sensitive  
Data Files\Round 2\NHATS Round 2 NSOC Files\SAS;  
%LET filepath12=C:\UB\Projects\2019\Suzanne Sullivan\NHATS project\Sensitive  
Data Files\Round 3\NHATS Round 3 NSOC Files\SAS;  
%LET filepath13=C:\UB\Projects\2019\Suzanne Sullivan\NHATS project\Sensitive  
Data Files\Round 4\NHATS Round 4 NSOC Files\SAS;  
%LET filepath14=C:\UB\Projects\2019\Suzanne Sullivan\NHATS project\Sensitive  
Data Files\Round 5\NHATS Round 5 NSOC Files\SAS;  
%LET filepath15=C:\UB\Projects\2019\Suzanne Sullivan\NHATS project\Sensitive  
Data Files\Round 6\NHATS Round 6 NSOC Files\SAS;  
%LET filepath16=C:\UB\Projects\2019\Suzanne Sullivan\NHATS project\Sensitive  
Data Files\Round 7\NHATS Round 7 NSOC Files\Cross-Sectional File\SAS;  
%LET filepath17=C:\UB\Projects\2019\Suzanne Sullivan\NHATS project\Sensitive  
Data Files\Round 8\NHATS Round 8 NSOC Files\SAS;  
%LET filepath18=C:\UB\Projects\2019\Suzanne Sullivan\NHATS project\Sensitive  
Data Files\Round 9\NHATS Round 9 NSOC Files\SAS;
```

```
DATA NSOCR1;  
  SET "&filepath10\NSOC_Round_1_File_V3";  
RUN;
```

```
DATA NSOCR5;  
  SET "&filepath14\NSOC_Round_5_File_V4";  
RUN;
```

```
DATA NSOCR7;  
  SET "&filepath16\NSOC_R7_Crss_File_V2";  
RUN;
```

```
/*Sort data sets */
```

## SAS ALGORITHM FOR DEMENTIA

```
PROC SORT DATA = NSOCR1;  
  BY SPID OPID;  
RUN;
```

```
PROC SORT DATA = NSOCR5;  
  BY SPID OPID;  
RUN;
```

```
PROC SORT DATA = NSOCR7;  
  BY SPID OPID;  
RUN;
```

```
DATA NSOCR1;  
  SET NSOCR1;  
  OPIDR1=OPID;  
RUN;
```

```
DATA NSOCR5;  
  SET NSOCR5;  
  OPIDR5=OPID;  
RUN;
```

```
DATA NSOCR7;  
  SET NSOCR7;  
  OPIDR7=OPID;  
RUN;
```

```
DATA NSOC_R1_R5_R7;  
  MERGE NSOCR1 NSOCR5 NSOCR7;  
  BY SPID OPID;  
RUN;
```

```
DATA NSOC_R1_R5_R7_simple;  
  SET NSOC_R1_R5_R7;  
  Cluster = 2;  
  IF SPID <= 10012411 THEN Cluster = 1;  
  KEEP SPID OPID OPIDR1 OPIDR5 OPIDR7 ;  
RUN;
```

```
proc export data= NSOC_R1_R5_R7_simple  
  outfile= "C:\UB\Projects\2019\Suzanne Sullivan\R03 project\Analysis 6-15-  
21\NSOC_R1_R5_R7_simple.sav";  
run;
```

```
DATA NSOC_R1_R5_R7 (drop=i);;  
  SET NSOC_R1_R5_R7;  
  array OPID_call{*} OPIDR1 OPIDR5 OPIDR7;  
  array OPID_count{*} OPIDR1 OPIDR5 OPIDR7;  
  DO i = 1 to dim(OPID_call);  
    OPID_count{i} = OPID_call{i};
```

## SAS ALGORITHM FOR DEMENTIA

```
IF OPID_call{i} ^= . THEN OPID_count{i} = 1; /* meaning interviewed */
IF OPID_call{i} = . THEN OPID_count{i} = 0;
OPID_count_sum = sum(of OPID_count{*});
END;
cdchlphrsdy_sum= sum(cdc1hlphrsdy, cdc5hlphrsdy, cdc7hlphrsdy);
OPID_count_cdchlphrsdy_sum=sum(OPID_count_sum,cdchlphrsdy_sum);
RUN;

DATA NSOC_R1_R5_R7_simple_1;
SET NSOC_R1_R5_R7;
KEEP SPID OPID OPIDR1 OPIDR5 OPIDR7 OPID_count_sum cdc1hlphrsdy cdc5hlphrsdy
cdc7hlphrsdy cdchlphrsdy_sum OPID_count_cdchlphrsdy_sum;
RUN;

proc export data= NSOC_R1_R5_R7_simple_1
  outfile= "C:\UB\Projects\2019\Suzanne Sullivan\R03 project\Analysis 6-15-
21\NSOC_R1_R5_R7_simple_1.sav";
run;

PROC SORT DATA=NSOC_R1_R5_R7 OUT=NSOC_R1_R5_R7;
  BY SPID OPID_count_sum cdchlphrsdy_sum;
RUN;

DATA NSOC_R1_R5_R7_simple_2;
SET NSOC_R1_R5_R7;
KEEP SPID OPID OPIDR1 OPIDR5 OPIDR7 OPID_count_sum cdc1hlphrsdy
cdc5hlphrsdy cdc7hlphrsdy cdchlphrsdy_sum OPID_count_cdchlphrsdy_sum;
RUN;

proc export data= NSOC_R1_R5_R7_simple_2
  outfile= "C:\UB\Projects\2019\Suzanne Sullivan\R03 project\Analysis 6-15-
21\NSOC_R1_R5_R7_simple_2.sav";
run;

DATA NSOC_R1_R5_R7_simple_061521;
SET NSOC_R1_R5_R7;
  BY SPID;
  IF last.SPID;
  Cluster = 2;
  IF SPID <= 10012411 THEN Cluster = 1;
  OPID_interview = OPID;
  KEEP SPID OPID OPID_interview Cluster;
RUN;

proc export data= NSOC_R1_R5_R7_simple_061521
  outfile= "C:\UB\Projects\2019\Suzanne Sullivan\R03 project\Analysis 6-15-
21\NSOC_R1_R5_R7_simple_061521.sav";
run;
```
