# Supplementary material
Source: PubMed Central journal article supplement (PMC9386760)
Supplement: sj-pdf-4-ajh-10.1177_10499091211057291.pdf [file sj-pdf-4-ajh-10.1177_10499091211057291.pdf]

## SAS ALGORITHM FOR DEMENTIA

### Supplemental Material 4. Final Data Join: NHATSNSOC\_clean\_06.15.21.sav

```
/*Run NHATS data format statements */

/* NHATS_Round_1_Combined_PROC_FORMAT_Statement.sas */

PROC FORMAT;

    VALUE dosfacd /* FOR FQ1dosfacd */
        -8 = "-8 DK"
        -1 = "-1 INAPPLICABLE"
        1 = " 1 FREE STANDING NURSING HOME"
        2 = " 2 FREE STANDING ASSISTED LIVING FACILITY / RESIDENTIAL CARE
FACILITY"
        3 = " 3 NURSING HOME AND ASSISTED LIVING FACILITY"
        4 = " 4 CONTINUING CARE RETIREMENT COMMUNITY (CCRC)"
        5 = " 5 ADULT FAMILY CARE HOME"
        6 = " 6 GROUP HOME"
        7 = " 7 BOARD AND CARE HOME / PERSONAL CARE HOME"
        8 = " 8 RETIREMENT COMMUNITY OR SENIOR HOUSING (NOT CCRC)"
        9 = " 9 INDEPENDENT LIVING"
        10 = " 10 ASSISTED AND INDEPENDENT/RETIREMENT (NO NURSING HOME)"
        11 = " 11 HOUSING (APT, CONDO, ETC.)";
    ;
    VALUE dosfaca /* FOR FQ1dosfaca */
        -8 = "-8 DK"
        -1 = "-1 INAPPLICABLE"
        1 = " 1 INDEPENDENT LIVING / HOUSING / RETIREMENT "
        2 = " 2 ASSISTED LIVING / PERSONAL CARE"
        3 = " 3 SPECIAL CARE, MEMORY CARE, OR ALZHEIMER'S UNIT"
        4 = " 4 NURSING HOME" ;

    VALUE DLOCSP /* FOR FQ1DLOCSP2 */
        -1 = "-1 INAPPLICABLE"
        1 = " 1 INDEPENDENT LIVING "
        2 = " 2 ASSISTED LIVING "
        3 = " 3 SPECIAL CARE UNIT"
        8 = " 8 NOT REPORTED" ;

    VALUE CODE60_64B /*FOR CODE60_64B*/
        -1 = "-1 INAPPLICABLE"
        1 = " 1 INDEPENDENT LIVING "
        2 = " 2 ASSISTED LIVING, SCU, NOT REPORTED";

    VALUE DLOCSP2F /* FOR FQ1DLOCSP */
        -1 = "-1 Inapplicable"
        1 = " 1 Independent living"
        2 = " 2 Assisted living"
        3 = " 3 Special care unit"
        4 = " 4 Nursing Home"
        8 = " 8 Not reported";

/* used in creation of opldhrsmth */
    value gt0f
        -7,-8 = "-7,-8:DK/RF"
        -1 = "-1:Inapp. "

```

## SAS ALGORITHM FOR DEMENTIA

```

-9 = "-9:Missing "
1-high = ">0";
VALUE schedf
1 = "1:Regular"
2 = "2:Varied"
-7,-8 = "-7,-8:DK/RF"
-1 = "-1:Inapp."
-9 = "-9:Missing" ;
VALUE ynf
1 = "1:Yes"
2 = "2:No"
-7,-8 = "-7,-8:DK/RF"
-1 = "-1:Inapp."
-9 = "-9:Missing" ;
value gt0hours
-12= "-12:valid skip/staff"
-11= "-11:hours missing"
-10= "-10:days missing"
-9 = "-9:days+hrs missing"
-1 = "-1:Inapp."
0 = "0:<1 hour/day"
1-744=">0"
9999="Not codeable, <1 hour/day";
value hoursf /*with categories for distribution checking*/
-12= "-12:valid skip/staff"
-11= "-11:hours missing"
-10= "-10:days missing"
-9 = "-9:days+hrs missing"
-1 = "-1:Inapp."
0-<1 = "<1"
1-<10 = " 1-<10"
10-<20 = "10-<20"
20-<30 = "20-<30"
30-<40 = "30-40"
40-<60 = "40-60"
60-<120 = "60-120"
120-<180="120-180"
180-744="180-744 (24/7) "
9999="Not codeable, <1 hour/day";
*****;
VALUE release
1 = '1 - Main Sample'
2 = '2 - Reserve Sample'
9 = '9 - New Release Sample';
VALUE dchntinh
1 = '1 - Child identified in interview but not enumerated to OP File'
-1 = '-1 - inapplicable';

VALUE dmissadd
1 = ' 1 no flags and added at CL section'
2 = ' 2 no flags and added at DT section'
3 = ' 3 no flags and added at EW section'
4 = ' 4 no flags and added at HA section'
5 = ' 5 no flags and added at HO section'
6 = ' 6 no flags and added at MC section'
7 = ' 7 no flags and added at MO section'
8 = ' 8 no flags and added at PA section'

```

## SAS ALGORITHM FOR DEMENTIA

```
9 = '9 no flags and added at PE section'
10 = '10 no flags and added at SC section'
11 = '11 no flags and added at SN section'
-1 = '-1 not applicable';

VALUE dnsoc
  1 = '1 eligible and interviewed'
  2 = '2 eligible and not interviewed'
  -1 = '-1 inapplicable';

/* FORMATS FOR MDS */
VALUE INDEP
  1 = '1 Independent'
  2 = '2 Supervision or help'
  3 = '3 Total dependence'
  4 = '4 Activity occurred 2 or fewer times'
  -1 = '-1 inapplicable (not nursing home resident)'
  -8 = '-8 DK';

VALUE CANE
  1 = '1 normally uses cane'
  2 = '2 no indication normally uses cane'
  -8 = '-8 DK'
  -1 = '-1 inapplicable (not nursing home resident)';

VALUE WALKER
  1 = '1 normally uses walker'
  2 = '2 no indication normally uses walker'
  -8 = '-8 DK'
  -1 = '-1 inapplicable (not nursing home resident)';

VALUE WHEELCH
  1 = '1 normally uses wheelchair'
  2 = '2 no indication normally uses wheelchair'
  -8 = '-8 DK'
  -1 = '-1 inapplicable (not nursing home resident)';

VALUE CS1D_F
  1= '1 Yes'
  2= '2 Yes corrected by NHATS'
  3= '3 No'
  4= '4 Yes but missing OP records for child outside household '
  -1= '-1 Inapplicable'
  -7= '-7 RF'
  -8= '-8 DK'
  -9= '-9 Missing';

VALUE FQ_4F
  1='1 YES'
  2='2 NO';

VALUE GENDER
  1 = '1 MALE'
  2 = '2 FEMALE';

VALUE RFDK
```

## SAS ALGORITHM FOR DEMENTIA

```
-7 = '-7 RF'  
-8 = '-8 DK'  
-1 = '-1 Inapplicable (nursing home resident or residential care no FQ)'  
-9 = '-9 Missing';
```

```
VALUE RFDK_F  
-7 = '-7 RF'  
-8 = '-8 DK'  
-1 = '-1 Inapplicable'  
-9 = '-9 Missing';
```

```
VALUE RFDK_Y  
1 = ' 1 Yes'  
-7 = '-7 RF'  
-8 = '-8 DK'  
-1 = '-1 Inapplicable'  
-9 = '-9 Missing';
```

```
VALUE RFDK_YN  
1 = ' 1 Yes'  
2 = ' 2 No'  
-7 = '-7 RF'  
-8 = '-8 DK'  
-1 = '-1 Inapplicable'  
-9 = '-9 Missing';
```

```
VALUE DMGETHLP  
-7 = '-7 RF'  
-8 = '-8 DK'  
-1 = '-1 Inapplicable'  
-9 = '-9 Missing'  
997 = '997 Help Since Birth/Entire Life';
```

```
VALUE CENDIV /* RE1DCENSNDIV */  
1 = '1 Northeast Region: New England Division'  
2 = '2 Northeast Region: Middle Atlantic Division'  
3 = '3 Midwest Region: East North Central Division'  
4 = '4 Midwest Region: West North Central Division'  
5 = '5 South Region: South Atlantic Division'  
6 = '6 South Region: East South Central Division'  
7 = '7 South Region: West South Central Division'  
8 = '8 West Region: Mountain Division'  
9 = '9 West Region: Pacific Division'  
-9 = '-9 Not Ascertained (error Missing)';
```

```
VALUE INAPMISS  
-1 = '-1 Inapplicable'  
-7 = '-7 RF'  
-8 = '-8 DK'  
-9 = '-9 Missing' ;
```

```
VALUE INAPMI_S  
-1 = '-1 Inapplicable'  
-9 = '-9 Children outside SP Household and OP records missing' ;
```

```
VALUE HT1DRESC  
1 = ' 1 NURSING HOME'
```

## SAS ALGORITHM FOR DEMENTIA

```
    2 = ' 2 GROUP HOME/ASSTLVNG/CCRC '  
    3 = ' 3 RESIDENTIAL CARE '  
    4 = ' 4 NOT RESIDENTIAL CARE '  
   -7 = '-7 RF '  
   -8 = '-8 DK';  
  
VALUE R1DRESID  
    1 = '1 Community '  
    2 = '2 Residential Care Resident not nursing home (SP interview  
complete) '  
    3 = '3 Residential Care Resident not nursing home (FQ only) '  
    4 = '4 Nursing Home Resident';  
  
VALUE R1DRES_R  
    1 = ' 1 Case recoded from nursing home resident to other residential  
care '  
   -1 = '-1 Inapplicable';  
  
VALUE HT1DLVNG  
    1 = '1 Alone '  
    2 = '2 With spouse/partner only [spouse/partner in household] '  
    3 = '3 With spouse/partner and with others '  
    4 = '4 With others only '  
   -1 = '-1 Inapplicable '  
   -9 = '-9 Missing' ;  
  
VALUE DLVNGARR  
1 = '1 Alone '  
2 = '2 With spouse/partner only [spouse/partner in household] '  
3 = '3 With spouse/partner and with others '  
4 = '4 With others only '  
-1 = '-1 Inapplicable '  
-9 = '-9 Missing ' ;  
  
VALUE WORDLIST  
    1 = ' 1 YES '  
    2 = ' 2 NO '  
    3 = ' 3 NO WORDS REMEMBERED '  
    4 = ' 4 REFUSED '  
   -1 = '-1 Inapplicable (nursing home resident or residential care FQ  
only) '  
   -9 = '-9 Missing' ;  
  
VALUE WORDREC  
    1 = ' 1 LIST 1 '  
    2 = ' 2 LIST 2 '  
    3 = ' 3 LIST 3 '  
   -1 = '-1 Inapplicable '  
   -9 = '-9 Missing';  
  
VALUE WORDRECO  
    1 = ' 1 NO WORDS REMEMBERED '  
    2 = ' 2 NO '  
   -1 = '-1 Inapplicable '  
   -2 = '-2 Proxy says cannot ask SP '  
   -3 = '-3 Proxy says can ask SP but SP unable to answer'
```

## SAS ALGORITHM FOR DEMENTIA

```
-7 = '-7 SP refused activity'  
-9 = '-9 Missing';
```

### VALUE WORDRECP

```
1 = '1 REFUSED WORD RECALL TASK'  
2 = '2 NO'  
-1 = '-1 Inapplicable '  
-2 = '-2 Proxy says cannot ask SP'  
-3 = '-3 Proxy says can ask SP but SP unable to answer'  
-7 = '-7 SP refused activity'  
-9 = '-9 Missing';
```

### VALUE WORDRECN

```
1 = ' 1 YES '  
2 = ' 2 NO '  
-1 = '-1 Inapplicable '  
-2 = '-2 Proxy says cannot ask SP'  
-3 = '-3 Proxy says can ask SP but SP unable to answer'  
-7 = '-7 SP refused activity'  
-9 = '-9 Missing';
```

### VALUE WORDRE\_N

```
-1 = '-1 Inapplicable '  
-2 = '-2 Proxy says cannot ask SP'  
-3 = '-3 Proxy says can ask SP but SP unable to answer'  
-7 = '-7 SP refused activity'  
-9 = '-9 Missing';
```

### VALUE WORDRE\_P

```
1 = ' 1 YES '  
2 = ' 2 NO '  
-1 = '-1 Inapplicable '  
-2 = '-2 Proxy says cannot ask SP'  
-3 = '-3 Proxy says can ask SP but SP unable to answer'  
-7 = '-7 SP refused activity'  
-9 = '-9 Missing';
```

### VALUE WORDRECC

```
-1 = '-1 Inapplicable '  
-2 = '-2 Proxy says cannot ask SP'  
-3 = '-3 Proxy says can ask SP but SP unable to answer'  
-7 = '-7 SP refused activity'  
-9 = '-9 Missing';
```

### VALUE CLOCKSC

```
-1 = '-1 Inapplicable '  
-2 = '-2 Proxy says cannot ask SP'  
-3 = '-3 Proxy says can ask SP but SP unable to answer'  
-4 = '-4 SP did not attempt to draw clock'  
-7 = '-7 SP refused to draw clock'  
-9 = '-9 Missing';
```

### VALUE MDOUTSLF

```
1 = " 1 Did not do by self in last month"  
2 = " 2 Did by self in last month/no difficulty"  
3 = " 3 Did by self in last month/difficulty"  
4 = " 4 DKRF did by self in last month/no difficulty"
```

## SAS ALGORITHM FOR DEMENTIA

```
5 = " 5 DKRF did by self in last month/difficulty"  
6 = " 6 Did by self in last month/DKRF difficulty"  
7 = " 7 DKRF did by self in last month/DKRF difficulty"  
8 = " 8 Not done in last month"  
-1 = "-1 Inapplicable "  
-9 = '-9 Missing';
```

### VALUE MDOUTDEV

```
8 = " 8 Not done in last month"  
1 = " 1 No use of devices to go outside in last month"  
2 = " 2 Use of devices to go outside in last month"  
3 = " 3 DKRF if used devices to go outside in last month"  
4 = " 4 DKRF if used devices in last month"  
-1 = "-1 Inapplicable "  
-9 = '-9 Missing';
```

### VALUE MDOUTHLP

```
8 = " 8 Not done in last month"  
1 = " 1 No help to go outside in last month"  
2 = " 2 Had help to go outside in last month"  
3 = " 3 DKRF if had help to go outside in last month"  
-1 = "-1 Inapplicable "  
-9 = '-9 Missing';
```

### VALUE MODINSLF

```
8 = " 8 Not done in last month"  
1 = " 1 Did not do by self in last month"  
2 = " 2 Did by self in last month/no difficulty"  
3 = " 3 Did by self in last month/difficulty"  
4 = " 4 DKRF did by self in last month/no difficulty"  
5 = " 5 DKRF did by self in last month/difficulty"  
6 = " 6 Did by self in last month/DKRF difficulty"  
7 = " 7 DKRF did by self in last month/DKRF difficulty"  
-1 = "-1 Inapplicable"  
-9 = '-9 Missing';
```

### VALUE MODINDEV

```
8 = " 8 Not done in last month"  
1 = " 1 No use of devices inside in last month"  
2 = " 2 Use of devices inside in last month"  
3 = " 3 DKRF if used devices inside in last month"  
4 = " 4 DKRF on use of devices "  
-1 = "-1 Inapplicable ";
```

### VALUE MODINHLP

```
8 = " 8 Not done in last month"  
1 = " 1 No help to go around inside in last month"  
2 = " 2 Had help to go around inside in last month"  
3 = " 3 DKRF if had help to go around inside in last month"  
-1 = "-1 Inapplicable";
```

### VALUE MDBEDSLF

```
8 = " 8 Not done in last month"  
1 = " 1 Did not do by self in last month"  
2 = " 2 Did by self in last month/no difficulty"  
3 = " 3 Did by self in last month/difficulty"  
4 = " 4 DKRF did by self in last month/no difficulty"
```

## SAS ALGORITHM FOR DEMENTIA

```
5 = " 5 DKRF did by self in last month/difficulty"
6 = " 6 Did by self in last month/DKRF difficulty"
7 = " 7 DKRF did by self in last month/DKRF difficulty"
-1 = "-1 Inapplicable"
-9 = '-9 Missing';

VALUE MDBEDDEV
1 = " 1 No use of cane or walker to get out of bed in last month"
2 = " 2 Use of cane or walker to get out of bed in last month"
3 = " 3 DKRF if used cane or walker to get out of bed in last month "
4 = " 4 DKRF if used cane or walker in last month"
-1 = "-1 Inapplicable ";

VALUE MDBEDHLP
1 = " 1 No help to get out of bed in last month"
2 = " 2 Had help to get out of bed in last month"
3 = " 3 DKRF if had help to get out of bed in last month"
-1 = "-1 Inapplicable" ;

VALUE DMDHLPYR
1 = " 1 No mobility help in last year"
2 = " 2 Mobility help in last year"
-7 = " -7 RF"
-8 = " -8 DK"
-1 = " -1 Inapplicable ";

VALUE DMDHLPST
0 = ' 0 less than 1 month of help'
1 = ' 1 1 month of help'
2 = ' 2 2 months of help'
3 = ' 3 3 months of help'
4 = ' 4 4 months of help'
5 = ' 5 5 months of help'
6 = ' 6 6 months of help'
7 = ' 7 7 months of help'
8 = ' 8 8 months of help'
9 = ' 9 9 months of help'
10 = '10 10 months of help'
11 = '11 11 months of help'
-7 = '-7 help last month but RF number of months of help in year'
-8 = '-8 help last month but DK number of months of help in year'
-1 = " -1 Inapplicable ";

VALUE DMDHLPEN
0 = ' 0 less than 1 month since help ended'
1 = ' 1 1 month since help ended'
2 = ' 2 2 months since help ended'
3 = ' 3 3 months since help ended'
4 = ' 4 4 months since help ended'
5 = ' 5 5 months since help ended'
6 = ' 6 6 months since help ended'
7 = ' 7 7 months since help ended'
8 = ' 8 8 months since help ended'
9 = ' 9 9 months since help ended'
10 = '10 10 months since help ended'
11 = '11 11 months since help ended'
-7 = '-7 no help last month and RF number of months since help ended'
```



## SAS ALGORITHM FOR DEMENTIA

```
-8 = '-8 no help last month and DK number of months since help ended'  
-1 = '-1 Inapplicable ';
```

### VALUE DMHLPYRS

```
0 = '0 none or less than 1 year'  
997 = '997 since birth'  
-7 = '-7 RF'  
-8 = '-8 DK'  
-1 = '-1 Inapplicable '  
-9 = '-9 Missing';
```

### VALUE DMDDEVYR

```
1 = ' 1 No Mobility device use in last year'  
2 = ' 2 Mobility device use in last year'  
-1 = '-1 Inapplicable '  
-7 = '-7 RF'  
-8 = '-8 DK'  
-9 = '-9 Missing';
```

### VALUE DMDEVST

```
0 = ' 0 less than 1 month of mobility device use'  
1 = ' 1 1 month of mobility device use'  
2 = ' 2 2 months of mobility device use'  
3 = ' 3 3 months of mobility device use'  
4 = ' 4 4 months of mobility device use'  
5 = ' 5 5 months of mobility device use'  
6 = ' 6 6 months of mobility device use'  
7 = ' 7 7 months of mobility device use'  
8 = ' 8 8 months of mobility device use'  
9 = ' 9 9 months of mobility device use'  
10 = '10 10 months of mobility device use'  
11 = '11 11 months of mobility device use'  
-7 = '-7 used last month but RF number of months of use in year'  
-8 = '-8 used last month but DK number of months of use in year'  
-1 = '-1 Inapplicable ';
```

### VALUE DMDEVEND

```
1 = ' 1 1 month since mobility device use ended'  
2 = ' 2 2 months since mobility device use ended'  
3 = ' 3 3 months since mobility device use ended'  
4 = ' 4 4 months since mobility device use ended'  
5 = ' 5 5 months since mobility device use ended'  
6 = ' 6 6 months since mobility device use ended'  
7 = ' 7 7 months since mobility device use ended'  
8 = ' 8 8 months since mobility device use ended'  
9 = ' 9 9 months since mobility device use ended'  
10 = '10 10 months since mobility device use ended'  
11 = '11 11 months since mobility device use ended'  
-7 = '-7 no use last month and RF number of months since device use  
ended'  
-8 = '-8 no use last month and DK number of months since device use  
ended'  
-1 = '-1 Inapplicable ';
```

```
;
```

### VALUE DMDEVYRS

```
0 = '0 none or less than 1 year'
```

## SAS ALGORITHM FOR DEMENTIA

```
997 = '997 since birth'
-7 = '-7 DK'
-8 = '-8 RF'
-1 = '-1 Inapplicable '
;

VALUE HADLSLF
1 = ' 1 Did not do by self in last month'
2 = ' 2 Did by self in last month/no difficulty'
3 = ' 3 Did by self in last month/difficulty'
4 = ' 4 DKRF did by self in last month/no difficulty'
5 = ' 5 DKRF did by self in last month/difficulty'
6 = ' 6 Did by self in last month/DKRF difficulty'
7 = ' 7 DKRF did by self in last month/DKRF difficulty'
8 = ' 8 Not done in last month'
-1 = '-1 Inapplicable' ;

VALUE HADLOTH
1 = ' 1 Health/functioning reason only'
2 = ' 2 Other reason only'
3 = ' 3 Both health/functioning and other reason'
4 = ' 4 Service/someone from the place SP lives'
-7 = '-7 RF'
-8 = '-8 DK'
-1 = '-1 Inapplicable' ;

VALUE HADSHSLF
1 = ' 1 Did not do by self in last month'
2 = ' 2 Did by self in last month/no difficulty'
3 = ' 3 Did by self in last month/difficulty'
4 = ' 4 DKRF did by self in last month/no difficulty'
5 = ' 5 DKRF did by self in last month/difficulty'
6 = ' 6 Did by self in last month/DKRF difficulty'
7 = ' 7 DKRF did by self in last month/DKRF difficulty'
8 = ' 8 Not done in last month'
-1 = '-1 Inapplicable' ;

VALUE HADSHOTH
1 = ' 1 Health/functioning reason only'
2 = ' 2 Other reason only'
3 = ' 3 Both health/functioning and other reason'
4 = ' 4 Service/someone from the place SP lives'
-7 = '-7 RF'
-8 = '-8 DK'
-1 = '-1 Inapplicable ' ;

VALUE HADMLSFLF
1 = ' 1 Did not do by self in last month'
2 = ' 2 Did by self in last month/no difficulty'
3 = ' 3 Did by self in last month/difficulty'
4 = ' 4 DKRF did by self in last month/no difficulty'
5 = ' 5 DKRF did by self in last month/difficulty'
6 = ' 6 Did by self in last month/DKRF difficulty'
7 = ' 7 DKRF did by self in last month/DKRF difficulty'
8 = ' 8 Not done in last month'
-1 = '-1 Inapplicable' ;
```

## SAS ALGORITHM FOR DEMENTIA

### VALUE HADMLOTH

```
1 = ' 1 Health/functioning reason only'  
2 = ' 2 Other reason only'  
3 = ' 3 Both health/functioning and other reason'  
4 = ' 4 Service/someone from the place SP lives'  
-7 = '-7 RF'  
-8 = '-8 DK'  
-1 = '-1 Inapplicable'  
-9 = '-9 Missing' ;
```

### VALUE HADBBSLF

```
1 = ' 1 Did not do by self in last month'  
2 = ' 2 Did by self in last month/no difficulty'  
3 = ' 3 Did by self in last month/difficulty'  
4 = ' 4 DKRF did by self in last month/no difficulty'  
5 = ' 5 DKRF did by self in last month/difficulty'  
6 = ' 6 Did by self in last month/DKRF difficulty'  
7 = ' 7 DKRF did by self in last month/DKRF difficulty'  
8 = ' 8 Not done in last month'  
-1 = 'Inapplicable' ;
```

### VALUE HADBBOTH

```
1 = ' 1 Health/functioning reason only'  
2 = ' 2 Other reason only'  
3 = ' 3 Both health/functioning and other reason'  
4 = ' 4 Service/someone from the place SP lives'  
-7 = '-7 RF'  
-8 = '-8 DK'  
-1 = '-1 Inapplicable' ;
```

### VALUE SCEATDEV

```
1 = ' 1 No use of adapted utensils in last month'  
2 = ' 2 Use of adapted utensils in last month'  
3 = ' 3 RFDK if used adapted utensils in last month'  
8 = ' 8 Not done in last month'  
-1 = '-1 Inapplicable'  
-9 = '-9 Missing' ;
```

### VALUE SCEATHLP

```
1 = ' 1 No help eating in last month'  
2 = ' 2 Help eating in last month'  
3 = ' 3 DKRF help eating in last month'  
8 = ' 8 Not done in last month'  
-1 = '-1 Inapplicable'  
-9 = '-9 Missing' ;
```

### VALUE SCEATDIF

```
1 = ' 1 Did not do by self in last month'  
2 = ' 2 No difficulty by self (and when using utensils)'  
3 = ' 3 Difficulty by self (and when using utensils)'  
6 = ' 6 Did by self in last month/DKRF difficulty'  
7 = ' 7 DKRF did by self in last month/DKRF difficulty'  
8 = ' 8 Not done in last month'  
-1 = '-1 Inapplicable'  
-9 = '-9 Missing' ;
```

### VALUE SCDBADEV

## SAS ALGORITHM FOR DEMENTIA

```
1 = ' 1 No use of grab bars or bath seats in last month'
2 = ' 2 Use of grab bars or bath seats in last month'
3 = ' 3 DKRF if use of grab bars or bath seats in last month'
4 = ' 4 DKRF if had grab bars or bath seats in last month'
9 = ' 9 No grab bars or bath seats or washes up (does not shower or
bathe) or has no shower or bathtub'
-1 = '-1 Inapplicable'
-9 = '-9 Missing'      ;

VALUE SCBTHHLP
1 = ' 1 No help bathing in last month'
2 = ' 2 Had help bathing in last month'
3 = ' 3 DKRF if had help bathing in last month'
-1 = '-1 Inapplicable'
-9 = '-9 Missing'      ;

VALUE SCDBADIF
1 = ' 1 Did not do by self in last month'
2 = ' 2 No difficulty by self (and when using grab bars or tub seat)'
3 = ' 3 Difficulty by self (and when using grab bars or tub seat)'
6 = ' 6 Did by self in last month/DKRF difficulty '
7 = ' 7 DKRF did by self in last month/DKRF difficulty'
-1 = '-1 Inapplicable'
-9 = '-9 Missing'      ;

VALUE SCTLTDEV
1 = " 1 No use of toileting devices in last month"
2 = " 2 Use of toileting devices in last month"
3 = ' 3 DKRF of some and no use of other toileting devices in last month'
-1 = '-1 Inapplicable'
-9 = '-9 Missing'      ;

VALUE SCTLTHLP
1 = ' 1 No help toileting in last month'
2 = ' 2 Had help toileting in last month'
3 = ' 3 DKRF if had help toileting in last month'
-1 = '-1 Inapplicable'
-9 = '-9 Missing';

VALUE SCDTODIF
1 = ' 1 Did not do by self in last month'
2 = ' 2 No difficulty by self (and when using toileting devices)'
3 = ' 3 Difficulty by self (and when using toileting devices)'
6 = ' 6 Did by self in last month/DKRF difficulty'
7 = ' 7 DKRF did by self in last month/DKRF difficulty'
-1 = '-1 Inapplicable'
-9 = '-9 Missing';

VALUE DDRDEV
1 = ' 1 No use of dressing devices in last month'
2 = ' 2 Use of dressing devices in last month'
3 = ' 3 DKRF if use of dressing devices in last month'
8 = ' 8 Not done in last month '
9 = ' 9 DKRF if dressed in last month'
-1 = '-1 Inapplicable'
-9 = '-9 Missing';
```

## SAS ALGORITHM FOR DEMENTIA

```
VALUE DDRHLP
1 = ' 1 No help dressing in last month'
2 = ' 2 Had help dressing in last month'
3 = ' 3 DKRF if had help dressing in last month'
8 = ' 8 Not done in last month '
9 = ' 9 DKRF if dressed in last month'
-1 = '-1 Inapplicable'
-9 = '-9 Missing';
```

```
VALUE DDRDIF
1 = ' 1 Did not do by self in last month'
2 = ' 2 No difficulty by self (and when using dressing devices)'
3 = ' 3 Difficulty by self (and when using dressing devices)'
6 = ' 6 Did by self in last month/DKRF difficulty'
7 = ' 7 DKRF did by self in last month/DKRF difficulty'
8 = ' 8 Not done in last month'
-1 = '-1 Inapplicable'
-9 = '-9 Missing';
```

```
VALUE DSDHLPYR
1 = ' 1 No self care help in last year'
2 = ' 2 Self care help in last year'
-1 = '-1 Inapplicable'
-7 = '-7 DK'
-8 = '-8 RF'
-9 = '-9 Missing';
```

```
VALUE DHLPST
0 = ' 0 - less than 1 month of self care help'
1 = ' 1 - 1 month of self care help'
2 = ' 2 - 2 months of self care help'
3 = ' 3 - 3 months of self care help'
4 = ' 4 - 4 months of self care help'
5 = ' 5 - 5 months of self care help'
6 = ' 6 - 6 months of self care help'
7 = ' 7 - 7 months of self care help'
8 = ' 8 - 8 months of self care help'
9 = ' 9 - 9 months of self care help'
10 = '10 - 10 months of self care help'
11 = '11 - 11 months of self care help'
-7 = '-7 - help in last month but RF number of months of help in last
year'
-8 = '-8 - help in last month but DK number of months of help in last
year'
-1 = '-1 - Inapplicable'
-9 = '-9 - Missing';
```

```
VALUE DHLPEND
1 = ' 1 - 1 month since self care help ended'
2 = ' 2 - 2 months since self care help ended'
3 = ' 3 - 3 months since self care help ended'
4 = ' 4 - 4 months since self care help ended'
5 = ' 5 - 5 months since self care help ended'
6 = ' 6 - 6 months since self care help ended'
7 = ' 7 - 7 months since self care help ended'
8 = ' 8 - 8 months since self care help ended'
9 = ' 9 - 9 months since self care help ended'
```

## SAS ALGORITHM FOR DEMENTIA

```
10 = '10 - 10 months since self care help ended'
11 = '11 - 11 months since self care help ended'
-7 = '-7 - no help last month and RF number of months since help ended'
-8 = '-8 - no help last month and DK number of months since help ended'
-1 = '-1 - Inapplicable'
-9 = '-9 - Missing';

VALUE DSHLPYRS
  0 = ' 0 None or less than 1 year of self care help'
 -7 = '-7 RF'
 -8 = '-8 DK'
 -1 = '-1 Inapplicable'
 -9 = '-9 Missing'      ;

VALUE DPMSLF
  1 = ' 1 Did not do by self in last month'
  2 = ' 2 Did by self in last month/no difficulty'
  3 = ' 3 Did by self in last month/difficulty'
  4 = ' 4 DKRF did by self in last month/no difficulty'
  5 = ' 5 DKRF did by self in last month/difficulty'
  6 = ' 6 Did by self in last month/DKRF difficulty'
  7 = ' 7 DKRF did by self in last month/DKRF difficulty'
  8 = ' 8 not done in last month'
  9 = ' 9 no or DKRF if medications taken in last month'
 -1 = '-1 Inapplicable'
 -9 = '-9 Missing'      ;

VALUE DFQTYPE
  0 = ' 0 Missing'
  2 = ' 2 Assisted Living or Continuing Care Retirement Community'
  3 = ' 3 Special care, memory care, Alheimers unit'
  4 = ' 4 Nursing home'
  8 = ' 8 DKRF'
  9 = ' 9 Independent living or other'
 -1 = '-1 Inapplicable'
 -9 = '-9 Missing'      ;

VALUE DPMOTH
  1 = ' 1 Health/functioning reason only'
  2 = ' 2 Other reason only'
  3 = ' 3 Both health/functioning and other'
  4 = ' 4 Service/someone from the place SP lives'
 -7 = '-7 RF'
 -8 = '-8 DK'
 -1 = '-1 Inapplicable'
 -9 = '-9 Missing'      ;

/* PE BOOKLET */
VALUE PE_STAT
  1 = '1 Booklet with recorded information on at least 1 test SP was
eligible for
      (balance stands, walking course, chair stands, grip strength, peak
air flow)'
  2 = ' 2 No recorded information'
 -1 = '-1 Inapplicable (nursing home or residential care FQ only)'
```

## SAS ALGORITHM FOR DEMENTIA

```
-9 = '-9 Missing';

VALUE BALSTAND
0 = ' 0 Not eligible balance stands'
1 = ' 1 Administer balance stands'
-9 = '-9 Residential care with no SP interview'
-1 = '-1 Inapplicable (nursing home resident)' ;

VALUE WALKADMN
0 = ' 0 Not eligible walking'
1 = ' 1 Administer walking'
-1 = '-9 Inapplicable (nursing home resident)'
-9 = '-1 Missing';

VALUE CHSTAND
0 = ' 0 Not eligible chair stands'
1 = ' 1 Administer chair stands'
-1 = '-9 Inapplicable (nursing home resident)'
-9 = '-1 Missing';

VALUE GRSTADMN
0 = ' 0 Not eligible grip strength'
1 = ' 1 Administer grip strength on right hand'
2 = ' 2 Administer grip strength on left hand'
-1 = '-1 Inapplicable (nursing home resident)'
-9 = '-9 Missing';

VALUE DWORK
1 = ' 1 Works'
2 = ' 2 Out of labor force including retired'
3 = ' 3 Other'
-7 = '-7 Missing';

VALUE ELAGE2US
0 = ' 0 less than age 1'
997 = '997 born in US'
-7 = ' -7 DK'
-8 = ' -8 RF'
-1 = ' -1 Inapplicable'
-9 = ' -9 Missing';

VALUE DSAMERES
1 = ' 1 Lives in same City and State as at age 15'
2 = ' 2 Lives in same state but different City (or DKRF city) as age 15'
3 = ' 3 Does not live in same State as age 15'
-7 = '-7 RF'
-8 = '-8 DK'
-1 = '-1 Inapplicable'
-9 = '-9 Missing' ;

VALUE RACEHISP
1 = ' 1 White, non-hispanic'
2 = ' 2 Black, non-hispanic'
3 = ' 3 Other (Am Indian/Asian/Native Hawaiian/Pacific Islander/other
specify), non-Hispanic'
4 = ' 4 Hispanic'
5 = ' 5 more than one DKRF primary'
```

## SAS ALGORITHM FOR DEMENTIA

```
6 = ' 6 DKRF'  
-9 = '-9 Missing';
```

```
VALUE $DISP  
  '10' = "10 Not Available "  
  '11' = "11 Ready"  
  '12' = "12 Started "  
  '20' = "20 Final "  
  '24' = "24 Not Required "  
  '60' = "60 Complete "  
  '61' = "61 Complete, NH facility"  
  '63' = "63 Complete SP, FQ not complete"  
  '64' = "64 Complete FQ, SP not complete"  
  '75' = "75 Physically/mentally unable to participate, no proxy"  
  '76' = "76 Too ill to participate, no proxy"  
  '77' = "77 Refusal, SP"  
  '78' = "78 Language barrier"  
  '79' = "79 Unable to locate"  
  '80' = "80 Unavailable during field period"  
  '82' = "82 Outside of PSU"  
  '83' = "83 Ineligible"  
  '85' = "85 Refusal, facility"  
  '86' = "86 Deceased"  
  '87' = "87 Refusal, proxy"  
  '88' = "88 Work stopped" ;
```

```
VALUE DISP_a  
 10 = "10 Not Available"  
 11 = "11 Ready"  
 12 = "12 Started"  
 20 = "20 Final"  
 24 = "24 Not Required"  
 60 = "60 Complete"  
 61 = "61 Complete, NH facility"  
 63 = "63 Complete SP, FQ not complete"  
 64 = "64 Complete FQ, SP not complete "  
 75 = "75 Physically/mentally unable to participate, no proxy"  
 76 = "76 Too ill to participate, no proxy"  
 77 = "77 Refusal, SP"  
 78 = "78 Language barrier"  
 79 = "79 Unable to locate"  
 80 = "80 Unavailable during field period"  
 82 = "82 Outside of PSU"  
 83 = "83 Ineligible"  
 85 = "85 Refusal, facility"  
 86 = "86 Deceased"  
 87 = "87 Refusal, proxy"  
 88 = "88 Work stopped" ;
```

```
VALUE DISP_  
 10 = "10 Not Available"  
 11 = "11 Ready"  
 12 = "12 Started"  
 20 = "20 Final"  
 24 = "24 Not Required";
```

```
VALUE $STAT_DT
```



## SAS ALGORITHM FOR DEMENTIA

```
'4' = " 4 April"  
'5' = " 5 May"  
'6' = " 6 June"  
'7' = " 7 July"  
'8' = " 8 August"  
'9' = " 9 September"  
'10' = "10 October"  
'11' = "11 November"  
'99' = "99 Prior to start of field work"  
'-1' = '-1 - Inapplicable';
```

```
VALUE STAT_DTa  
 4 = " 4 April"  
 5 = " 5 May"  
 6 = " 6 June"  
 7 = " 7 July"  
 8 = " 8 August"  
 9 = " 9 September"  
10 = "10 October"  
11 = "11 November"  
99 = "99 Prior to start of field work"  
-1 = '-1 - Inapplicable';
```

```
VALUE DOPAGECT  
-7 = '-7 - DK'  
-8 = '-8 - RF'  
-1 = '-1 - Inapplicable'  
-9 = '-9 - Missing'  
 1 = " 1 - UNDER 20"  
 2 = " 2 - 20-24"  
 3 = " 3 - 25-29"  
 4 = " 4 - 30-34"  
 5 = " 5 - 35-39"  
 6 = " 6 - 40-44"  
 7 = " 7 - 45-49"  
 8 = " 8 - 50-54"  
 9 = " 9 - 55-59"  
10 = "10 - 60-64"  
11 = "11 - 65-69"  
12 = "12 - 70-74"  
13 = "13 - 75-79"  
14 = "14 - 80-84"  
15 = "15 - 85-89"  
16 = "16 - 90 +";
```

```
VALUE DOPAGE2C  
-7 = '-7 - DK'  
-8 = '-8 - RF'  
-1 = '-1 - Inapplicable'  
-9 = '-9 - Missing'  
 1 = " 1 - UNDER 20"  
 2 = " 2 - 20-24"  
 3 = " 3 - 25-29"  
 4 = " 4 - 30-34"  
 5 = " 5 - 35-39"  
 6 = " 6 - 40-44"  
 7 = " 7 - 45-49"
```

## SAS ALGORITHM FOR DEMENTIA

```
8 = " 8 - 50-54"  
9 = " 9 - 55-59"  
10 = "10 - 60-65"  
11 = "11 - 66-69"  
12 = "12 - 70-74"  
13 = "13 - 75-79"  
14 = "14 - 80-84"  
15 = "15 - 85-89"  
16 = "16 - 90 +" ;  
  
VALUE DOPAGE3C  
1 = '1- UNDER 30'  
2 = '2- 30-39'  
3 = '3- 40-49'  
4 = '4- 50-59'  
5 = '5- 60-69'  
6 = '6- 70-79'  
7 = '7- 80-89'  
8 = '8- 90 +'  
-7 = '-7 - DK'  
-8 = '-8 - RF'  
-1 = '-1 - Inapplicable'  
-9 = '-9 - Missing';  
  
VALUE DSPSAGEC  
-7 = '-7 - RF'  
-8 = '-8 - DK'  
-1 = '-1 - Inapplicable'  
-9 = '-9 - Missing'  
1 = " 1 - UNDER 50"  
2 = " 2 - 50-54"  
3 = " 3 - 55-59"  
4 = " 4 - 60-64"  
5 = " 5 - 65-69"  
6 = " 6 - 70-74"  
7 = " 7 - 75-79"  
8 = " 8 - 80-84"  
9 = " 9 - 85-89"  
10 = "10 - 90 +" ;  
  
VALUE DINTAGEC  
1 = "1 - 65-69"  
2 = "2 - 70-74"  
3 = "3 - 75-79"  
4 = "4 - 80-84"  
5 = "5 - 85-89"  
6 = "6 - 90 +" ;  
  
VALUE DCLCKSC  
0 = '0 Not recognizable as a clock'  
1 = '1 Severely distorted depiction of a clock'  
2 = '2 Moderately distorted depiction of a clock'  
3 = '3 Mildly distorted depiction of a clock'  
4 = '4 Reasonably accurate depiction of a clock'  
5 = '5 Accurate depiction of a clock (circular or square)'  
-7 = '-7 SP refused to draw clock'
```

## SAS ALGORITHM FOR DEMENTIA

```
-8 = '-8 DK'  
-1 = '-1 Inapplicable'  
-2 = '-2 Proxy says cannot ask SP'  
-3 = '-3 Proxy says can ask SP but SP unable to answer'  
-4 = '-4 SP did not attempt to draw clock'  
-9 = '-9 Missing';
```

```
VALUE DCLCKCL  
  1 = '1 Very clear'  
  2 = '2 Somewhat clear'  
  3 = '3 Somewhat unclear'  
  4 = '4 Very unclear'  
  5 = '5 Blank'  
-7 = '-7 SP refused to draw clock'  
-8 = '-8 DK'  
-1 = '-1 Inapplicable'  
-2 = '-2 Proxy says cannot ask SP'  
-3 = '-3 Proxy says can ask SP but SP unable to answer'  
-4 = '-4 SP did not attempt to draw clock'  
-9 = '-9 Missing';
```

```
VALUE W000001W  
 12 = "12 STARTED"  
 20 = "20 COMPLETE"  
 21 = "21 INELIGIBLE - NOT 65+" ;
```

```
VALUE W000002W  
-7 = '-7 RF'  
-8 = '-8 DK'  
-1 = '-1 Inapplicable'  
-9 = '-9 Missing'  
 1 = " 1 MALE"  
 2 = " 2 FEMALE" ;
```

```
VALUE W000003W  
 1 = "1 Black"  
 2 = "2 Hispanic"  
 3 = "3 White" ;
```

```
VALUE W000004W  
 12 = "12 Started"  
 20 = "20 Complete" ;
```

```
VALUE W000005W  
-7 = '-7 RF'  
-8 = '-8 DK'  
-1 = '-1 Inapplicable'  
-9 = '-9 Missing'  
 1 = " 1 YES"  
 2 = " 2 NO" ;
```

```
VALUE W000006W  
 1 = "1 Person"  
 2 = "2 Agency" ;
```

```
VALUE W000007W  
 1 = "1 Yes"
```

## SAS ALGORITHM FOR DEMENTIA

```
2 = "2 Do not change this person's details"  
3 = "3 Mark person for removal" ;
```

```
VALUE W000008W
```

```
1 = " 1 - UNDER 20"  
2 = " 2 - 20-24"  
3 = " 3 - 25-29"  
4 = " 4 - 30-34"  
5 = " 5 - 35-39"  
6 = " 6 - 40-44"  
7 = " 7 - 45-49"  
8 = " 8 - 50-54"  
9 = " 9 - 55-59"  
10 = "10 - 60-65"  
11 = "11 - 66-69"  
12 = "12 - 70-74"  
13 = "13 - 75-79"  
14 = "14 - 80-85"  
15 = "15 - 86-89"  
16 = "16 - 90-94"  
17 = "17 - 95-99"  
18 = "18 - 100 +" ;
```

```
VALUE W000009W
```

```
1 = " 1 SAMPLE PERSON"  
2 = " 2 SPOUSE/ PARTNER"  
3 = " 3 DAUGHTER"  
4 = " 4 SON"  
5 = " 5 DAUGHTER-IN-LAW"  
6 = " 6 SON-IN-LAW"  
7 = " 7 STEPDAUGHTER"  
8 = " 8 STEPSON"  
9 = " 9 SISTER"  
10 = "10 BROTHER"  
11 = "11 SISTER-IN-LAW"  
12 = "12 BROTHER-IN-LAW"  
13 = "13 MOTHER"  
14 = "14 STEPMOTHER"  
15 = "15 MOTHER-IN-LAW"  
16 = "16 FATHER"  
17 = "17 STEPFATHER"  
18 = "18 FATHER-IN-LAW"  
19 = "19 GRANDDAUGHTER"  
20 = "20 GRANDSON"  
21 = "21 NIECE"  
22 = "22 NEPHEW"  
23 = "23 AUNT"  
24 = "24 UNCLE"  
25 = "25 COUSIN"  
26 = "26 STEPDAUGHTER'S SON/ DAUGHTER"  
27 = "27 STEPSON'S SON/ DAUGHTER"  
28 = "28 DAUGHTER-IN-LAW'S SON/ DAUGHTER"  
29 = "29 SON-IN-LAW'S SON/ DAUGHTER"  
30 = "30 BOARDER/RENTER"  
31 = "31 PAID AIDE/ HOUSEKEEPER/ EMPLOYEE"  
32 = "32 ROOMMATE"  
33 = "33 EX-WIFE/ EX-HUSBAND"
```

## SAS ALGORITHM FOR DEMENTIA

```
34 = "34 BOYFRIEND/ GIRLFRIEND"  
35 = "35 NEIGHBOR"  
36 = "36 FRIEND"  
37 = "37 STAFF PERSON AT THE PLACE SP LIVES"  
38 = "38 CO-WORKER"  
39 = "39 MINISTER, PRIEST, OR OTHER CLERGY"  
40 = "40 PSYCHIATRIST, PSYCHOLOGIST, COUNSELOR, OR THERAPIST"  
91 = "91 OTHER RELATIVE"  
92 = "92 OTHER NONRELATIVE" ;
```

VALUE W000010W

```
1 = " 1 MARRIED"  
2 = " 2 LIVING WITH A PARTNER"  
3 = " 3 SEPARATED"  
4 = " 4 DIVORCED"  
5 = " 5 WIDOWED"  
6 = " 6 NEVER MARRIED"  
-7 = '-7 RF'  
-8 = '-8 DK'  
-1 = '-1 INAPPLICABLE'  
-9 = '-9 MISSING';
```

VALUE W000011W

```
1 = " 1 HOME"  
2 = " 2 CELL PHONE"  
3 = " 3 WORK/OFFICE"  
4 = " 4 NEIGHBOR'S"  
5 = " 5 FRIEND'S"  
6 = " 6 RELATIVE'S"  
91 = "91 OTHER (SPECIFY)" ;
```

VALUE W000012W

```
-7 = '-7 RF'  
-8 = '-8 DK'  
-1 = '-1 Inapplicable'  
-9 = '-9 Missing'  
1 = " 1 NO SCHOOLING COMPLETED"  
2 = " 2 1ST-8TH GRADE"  
3 = " 3 9TH-12TH GRADE (NO DIPLOMA)"  
4 = " 4 HIGH SCHOOL GRADUATE (HIGH SCHOOL DIPLOMA OR EQUIVALENT)"  
5 = " 5 VOCATIONAL, TECHNICAL, BUSINESS, OR TRADE SCHOOL CERTIFICATE OR  
DIPLOMA (BEYOND HIGH SCHOOL LEVEL)"  
6 = " 6 SOME COLLEGE BUT NO DEGREE"  
7 = " 7 ASSOCIATE'S DEGREE"  
8 = " 8 BACHELOR'S DEGREE"  
9 = " 9 MASTER'S, PROFESSIONAL, OR DOCTORAL DEGREE";
```

VALUE W000013W

```
1 = " 1 REGULAR"  
2 = " 2 VARIED"  
-7 = '-7 RF'  
-8 = '-8 DK'  
-1 = '-1 INAPPLICABLE'  
-9 = '-9 MISSING' ;
```

VALUE W000014W

```
1 = " 1 SP AND/OR FAMILY"
```

## SAS ALGORITHM FOR DEMENTIA

```
2 = " 2 GOVERNMENT PROGRAM"
3 = " 3 INSURANCE"
91 = "91 OTHER (SPECIFY)" ;

VALUE W000015W
1 = " 1 HOURLY"
2 = " 2 WEEKLY"
3 = " 3 MONTHLY"
-7 = '-7 RF'
-8 = '-8 DK'
-1 = '-1 INAPPLICABLE'
-9 = '-9 MISSING' ;

VALUE W000016W
1 = " 1 MEDICAID"
2 = " 2 MEDICARE"
3 = " 3 STATE PROGRAM"
91 = "91 OTHER (SPECIFY)"
-7 = '-7 RF'
-8 = '-8 DK'
-1 = '-1 INAPPLICABLE'
-9 = '-9 MISSING' ;

VALUE W000017W
1 = "1 Yes"
2 = "2 No"
3 = "3 Refused" ;

VALUE W000018W
5 = " 5 DAUGHTER-IN-LAW"
6 = " 6 SON-IN-LAW"
9 = " 9 SISTER"
10 = "10 BROTHER"
11 = "11 SISTER-IN-LAW"
12 = "12 BROTHER-IN-LAW"
13 = "13 MOTHER"
14 = "14 STEPMOTHER"
15 = "15 MOTHER-IN-LAW"
16 = "16 FATHER"
17 = "17 STEPFATHER"
18 = "18 FATHER-IN-LAW"
19 = "19 GRANDDAUGHTER"
20 = "20 GRANDSON"
21 = "21 NIECE"
22 = "22 NEPHEW"
23 = "23 AUNT"
24 = "24 UNCLE"
25 = "25 COUSIN"
26 = "26 STEPDAUGHTER'S SON/ DAUGHTER"
27 = "27 STEPSON'S SON/ DAUGHTER"
28 = "28 DAUGHTER-IN-LAW'S SON/ DAUGHTER"
29 = "29 SON-IN-LAW'S SON/ DAUGHTER"
30 = "30 BOARDER/ RENTER"
31 = "31 PAID AIDE/ HOUSEKEEPER/ EMPLOYEE"
32 = "32 ROOMMATE"
33 = "33 EX-WIFE/ EX-HUSBAND"
34 = "34 BOYFRIEND/ GIRLFRIEND"
```

## SAS ALGORITHM FOR DEMENTIA

```
35 = "35 NEIGHBOR"  
36 = "36 FRIEND"  
91 = "91 OTHER RELATIVE"  
92 = "92 OTHER NONRELATIVE" ;  
  
VALUE W000019W  
5 = " 5 DAUGHTER-IN-LAW"  
6 = " 6 SON-IN-LAW"  
9 = " 9 SISTER"  
10 = "10 BROTHER"  
11 = "11 SISTER-IN-LAW"  
12 = "12 BROTHER-IN-LAW"  
13 = "13 MOTHER"  
14 = "14 STEPMOTHER"  
15 = "15 MOTHER-IN-LAW"  
16 = "16 FATHER"  
17 = "17 STEPFATHER"  
18 = "18 FATHER-IN-LAW"  
19 = "19 GRANDDAUGHTER"  
20 = "20 GRANDSON"  
21 = "21 NIECE"  
22 = "22 NEPHEW"  
23 = "23 AUNT"  
24 = "24 UNCLE"  
25 = "25 COUSIN"  
26 = "26 STEPDAUGHTER'S SON/ DAUGHTER"  
27 = "27 STEPSON'S SON/ DAUGHTER"  
28 = "28 DAUGHTER-IN-LAW'S SON/ DAUGHTER"  
29 = "29 SON-IN-LAW'S SON/ DAUGHTER"  
30 = "30 BOARDER/ RENTER"  
31 = "31 PAID AIDE/ HOUSEKEEPER/ EMPLOYEE"  
32 = "32 ROOMMATE"  
33 = "33 EX-WIFE/ EX-HUSBAND"  
34 = "34 BOYFRIEND/ GIRLFRIEND"  
35 = "35 NEIGHBOR"  
36 = "36 FRIEND"  
37 = "37 STAFF PERSON AT THE PLACE SP LIVES"  
38 = "38 CO-WORKER"  
39 = "39 MINISTER, PRIEST, OR OTHER CLERGY"  
40 = "40 PSYCHIATRIST, PSYCHOLOGIST, COUNSELOR, OR THERAPIST"  
91 = "91 OTHER RELATIVE"  
92 = "92 OTHER NONRELATIVE" ;  
  
VALUE W000020W  
-7 = '-7 RF'  
-8 = '-8 DK'  
-1 = '-1 Inapplicable'  
-9 = '-9 Missing'  
1 = "1 HOME"  
2 = "2 MULTI-UNIT"  
3 = "3 OTHER" ;  
  
VALUE W000021W  
-7 = '-7 RF'  
-8 = '-8 DK'  
-1 = '-1 Inapplicable'  
-9 = '-9 Missing'
```

## SAS ALGORITHM FOR DEMENTIA

```
1 = " 1 BUILDING HAS ONE FLOOR"
2 = " 2 BUILDING HAS MULTIPLE FLOORS" ;

VALUE W000022W
  1 = "1 REQUIRED"
 24 = "24 NOT REQUIRED" ;

VALUE W000023W
  1 = "1 NURSING HOME"
  2 = "2 OTHER FACILITY" ;

VALUE W000024W
  1 = " 1 HOME"
  2 = " 2 APARTMENT"
  3 = " 3 ROOM"
  4 = " 4 UNIT"
  5 = " 5 SUITE"
  6 = " 6 SOMETHING ELSE (SPECIFY)" ;

VALUE W000025W
-1 = '-1 Inapplicable'
-9 = '-9 Missing'
  1 = "1 SAMPLE PERSON (SP)"
  2 = "2 PROXY" ;

VALUE W000026W
  1 = " 1 DEMENTIA OR COGNITIVE IMPAIRMENT REPORTED BY PROXY"
  2 = " 2 SP TOO ILL"
  3 = " 3 SP SPEECH IMPAIRED"
  4 = " 4 SP HEARING IMPAIRED"
  5 = " 5 LANGUAGE BARRIER"
  6 = " 6 TEMPORARILY UNAVAILABLE"
 91 = "91 OTHER (SPECIFY)" ;

VALUE W000027W
  1 = "1 CONSENT TO RECORDING"
  7 = "7 REFUSE CONSENT TO RECORD" ;

VALUE W000028W
-7 = '-7 RF'
-8 = '-8 DK'
-1 = '-1 Inapplicable'
-9 = '-9 Missing'
  1 = " 1 SELF"
  2 = " 2 SPOUSE/ PARTNER"
  3 = " 3 DAUGHTER"
  4 = " 4 SON"
  5 = " 5 DAUGHTER-IN-LAW"
  6 = " 6 SON-IN-LAW"
  7 = " 7 STEPDAUGHTER"
  8 = " 8 STEPSON"
  9 = " 9 SISTER"
 10 = "10 BROTHER"
 11 = "11 SISTER-IN-LAW"
 12 = "12 BROTHER-IN-LAW"
 13 = "13 MOTHER"
 14 = "14 STEPMOTHER"
```



## SAS ALGORITHM FOR DEMENTIA

```
15 = "15 MOTHER-IN-LAW"  
16 = "16 FATHER"  
17 = "17 STEPFATHER"  
18 = "18 FATHER-IN-LAW"  
19 = "19 GRANDDAUGHTER"  
20 = "20 GRANDSON"  
21 = "21 NIECE"  
22 = "22 NEPHEW"  
23 = "23 AUNT"  
24 = "24 UNCLE"  
25 = "25 COUSIN"  
26 = "26 STEPDAUGHTER'S SON/ DAUGHTER"  
27 = "27 STEPSON'S SON/ DAUGHTER"  
28 = "28 DAUGHTER-IN-LAW'S SON/ DAUGHTER"  
29 = "29 SON-IN-LAW'S SON/ DAUGHTER"  
30 = "30 BOARDER/RENTER"  
31 = "31 PAID AIDE/ HOUSEKEEPER/ EMPLOYEE"  
32 = "32 ROOMMATE"  
33 = "33 EX-WIFE/ EX-HUSBAND"  
34 = "34 BOYFRIEND/ GIRLFRIEND"  
35 = "35 NEIGHBOR"  
36 = "36 FRIEND"  
37 = "37 STAFF PERSON FROM THE PLACE SP LIVES"  
38 = "38 CO-WORKER"  
39 = "39 MINISTER, PRIEST, OR OTHER CLERGY"  
40 = "40 PSYCHIATRIST, PSYCHOLOGIST, COUNSELOR, OR THERAPIST"  
91 = "91 OTHER RELATIVE"  
92 = "92 OTHER NONRELATIVE" ;
```

VALUE W000029W

```
-7 = '-7 RF'  
-8 = '-8 DK'  
-1 = '-1 Inapplicable'  
-9 = '-9 Missing'  
1 = " 1 VERY FAMILIAR"  
2 = " 2 SOMEWHAT FAMILIAR"  
3 = " 3 A LITTLE FAMILIAR"  
4 = " 4 NOT AT ALL FAMILIAR" ;
```

VALUE W000030W

```
-7 = '-7 RF'  
-8 = '-8 DK'  
-1 = '-1 Inapplicable'  
-9 = '-9 Missing'  
1 = " 1 FREE-STANDING (DETACHED) SINGLE HOUSE"  
2 = " 2 SINGLE HOUSE BUT ATTACHED TO OTHERS (ROW HOUSE, TOWNHOUSE,  
DUPLEX, TRIPLEX, OR TRIPLE DECKER) "  
3 = " 3 MOBILE HOME OR TRAILER"  
4 = " 4 MULTI-UNIT (2+) BUILDING"  
91 = "91 OTHER (SPECIFY) " ;
```

VALUE W000031W

```
-7 = '-7 RF'  
-8 = '-8 DK'  
-1 = '-1 Inapplicable'  
-9 = '-9 Missing'  
1 = " 1 EXCELLENT"
```

## SAS ALGORITHM FOR DEMENTIA

```
2 = " 2 VERY GOOD"
3 = " 3 GOOD"
4 = " 4 FAIR"
5 = " 5 POOR"      ;

VALUE W000032W
1 = " 1 SKIN CANCER"
2 = " 2 BREAST CANCER"
3 = " 3 PROSTATE CANCER"
4 = " 4 BLADDER CANCER"
5 = " 5 CERVICAL/OVARIAN/UTERINE CANCER"
6 = " 6 COLON CANCER"
7 = " 7 KIDNEY CANCER"
91 = "91 OTHER TYPE OF CANCER"      ;

VALUE W000033W
-7 = '-7 RF'
-8 = '-8 DK'
-1 = '-1 Inapplicable'
-9 = '-9 Missing'
1 = " 1 NOT AT ALL"
2 = " 2 SEVERAL DAYS"
3 = " 3 MORE THAN HALF THE DAYS"
4 = " 4 NEARLY EVERY DAY"      ;

VALUE W000034W
-7 = '-7 RF'
-8 = '-8 DK'
-1 = '-1 Inapplicable'
-9 = '-9 Missing'
1 = " 1 EVERY NIGHT"
2 = " 2 MOST NIGHTS"
3 = " 3 SOME NIGHTS"
4 = " 4 RARELY"
5 = " 5 NEVER"      ;

VALUE W000035W
-7 = '-7 RF'
-8 = '-8 DK'
-1 = '-1 Inapplicable'
-9 = '-9 Missing'
1 = " 1 EVERY NIGHT"
2 = " 2 MOST NIGHTS "
3 = " 3 SOME NIGHTS"
4 = " 4 RARELY"
5 = " 5 NEVER"
7 = " 7 DON'T WAKE UP/NOT A PROBLEM"      ;

VALUE W000036W
-7 = '-7 RF'
-8 = '-8 DK'
-1 = '-1 Inapplicable'
-9 = '-9 Missing'
1 = " 1 MONTHS"
2 = " 2 YEARS"      ;

VALUE W000037W
```

## SAS ALGORITHM FOR DEMENTIA

```
-7 = '-7 RF'  
-8 = '-8 DK'  
-1 = '-1 Inapplicable'  
-9 = '-9 Missing'  
1 = " 1 PRIVATE RESIDENCE"  
2 = " 2 A GROUP HOME, BOARD AND CARE, OR SUPERVISED HOUSING"  
3 = " 3 ASSISTED LIVING FACILITY OR CONTINUING CARE RETIREMENT  
COMMUNITY (CCRC) "  
4 = " 4 RELIGIOUS GROUP QUARTERS"  
91 = "91 OTHER (SPECIFY) "  
;
```

VALUE W000038W

```
-7 = '-7 RF'  
-8 = '-8 DK'  
-1 = '-1 Inapplicable'  
-9 = '-9 Missing'  
1 = " 1 YES"  
2 = " 2 NO"  
7 = " 7 PLACE DOES NOT HAVE A NAME" ;
```

VALUE W000039W

```
-7 = '-7 RF'  
-8 = '-8 DK'  
-1 = '-1 Inapplicable'  
-9 = '-9 Missing'  
1 = " 1 APARTMENT"  
2 = " 2 ROOM"  
3 = " 3 UNIT"  
4 = " 4 SUITE"  
91 = "91 SOMETHING ELSE (SPECIFY) " ;
```

VALUE W000040W

```
-7 = '-7 RF'  
-8 = '-8 DK'  
-1 = '-1 Inapplicable'  
-9 = '-9 Missing'  
1 = " 1 PRIVATE RESIDENCE"  
2 = " 2 A GROUP HOME, BOARD AND CARE, OR SUPERVISED HOUSING"  
3 = " 3 ASSISTED LIVING FACILITY OR CONTINUING CARE RETIREMENT  
COMMUNITY (CCRC) "  
5 = " 5 NURSING HOME"  
91 = "91 OTHER (SPECIFY) " ;
```

VALUE W000041W

```
3 = " 3 DAUGHTER"  
4 = " 4 SON"  
5 = " 5 DAUGHTER-IN-LAW"  
6 = " 6 SON-IN-LAW"  
7 = " 7 STEPDAUGHTER"  
8 = " 8 STEPSON"  
9 = " 9 SISTER"  
10 = "10 BROTHER"  
11 = "11 SISTER-IN-LAW"
```

## SAS ALGORITHM FOR DEMENTIA

```
12 = "12 BROTHER-IN-LAW"
13 = "13 MOTHER"
14 = "14 STEPMOTHER"
15 = "15 MOTHER-IN-LAW"
16 = "16 FATHER"
17 = "17 STEPFATHER"
18 = "18 FATHER-IN-LAW"
19 = "19 GRANDDAUGHTER"
20 = "20 GRANDSON"
21 = "21 NIECE"
22 = "22 NEPHEW"
23 = "23 AUNT"
24 = "24 UNCLE"
25 = "25 COUSIN"
26 = "26 STEPDAUGHTER'S SON/ DAUGHTER"
27 = "27 STEPSON'S SON/ DAUGHTER"
28 = "28 DAUGHTER-IN-LAW'S SON/ DAUGHTER"
29 = "29 SON-IN-LAW'S SON/ DAUGHTER"
30 = "30 BOARDER/ RENTER"
31 = "31 PAID AIDE/ HOUSEKEEPER/ EMPLOYEE"
32 = "32 ROOMMATE"
33 = "33 EX-WIFE/ EX-HUSBAND"
34 = "34 BOYFRIEND/ GIRLFRIEND"
36 = "36 FRIEND"
91 = "91 OTHER RELATIVE"
92 = "92 OTHER NONRELATIVE" ;

VALUE W000042W
  3 = "3 DAUGHTER"
  4 = "4 SON"
  7 = "7 STEPDAUGHTER"
  8 = "8 STEPSON" ;

VALUE W000043W
  1 = " 1 SocialNetwork: Person 1"
  2 = " 2 SocialNetwork: Person 2"
  3 = " 3 SocialNetwork: Person 3"
  4 = " 4 SocialNetwork: Person 4"
  5 = " 5 SocialNetwork: Person 5"
  6 = " 6 SocialNetwork: Person 6"
  7 = " 7 SocialNetwork: Person 7"
  8 = " 8 SocialNetwork: Person 8"
  9 = " 9 SocialNetwork: Person 9"
 10 = "10 SocialNetwork: Person 10"
 11 = "11 SocialNetwork: Person 11"
 12 = "12 SocialNetwork: Person 12"
 13 = "13 SocialNetwork: Person 13"
 14 = "14 SocialNetwork: Person 14"
 15 = "15 SocialNetwork: Person 15"
 16 = "16 SocialNetwork: Person 16"
 17 = "17 SocialNetwork: Person 17"
 18 = "18 SocialNetwork: Person 18"
 19 = "19 SocialNetwork: Person 19"
 20 = "20 SocialNetwork: Person 20"
 21 = "21 SocialNetwork: Person 21"
 22 = "22 SocialNetwork: Person 22" ;
```

## SAS ALGORITHM FOR DEMENTIA

```
VALUE W000044W
-7 = '-7 RF'
-8 = '-8 DK'
-1 = '-1 Inapplicable'
-9 = '-9 Missing'
 1 = " 1 COMMON OR SHARED ENTRANCE"
 2 = " 2 ENTRANCE DIRECTLY INTO HOME" ;
```

```
VALUE W000045W
-7 = '-7 RF'
-8 = '-8 DK'
-1 = '-1 Inapplicable'
-9 = '-9 Missing'
 1 = " 1 - 1"
 2 = " 2 - 2"
 3 = " 3 - 3"
 4 = " 4 - 4+" ;
```

```
VALUE W000046W
-7 = '-7 RF'
-8 = '-8 DK'
-1 = '-1 Inapplicable'
-9 = '-9 Missing'
 1 = " 1 ALL ITEMS HERE"
 2 = " 2 ADDED ONE OR MORE ITEMS" ;
```

```
VALUE W000047W
-7 = '-7 RF'
-8 = '-8 DK'
-1 = '-1 Inapplicable'
-9 = '-9 Missing'
 1 = " 1 MORE THAN $500"
 2 = " 2 LESS THAN $500"
 3 = " 3 JUST ABOUT $500" ;
```

```
VALUE W000048W
-7 = '-7 RF'
-8 = '-8 DK'
-1 = '-1 Inapplicable'
-9 = '-9 Missing'
 1 = " 1 MORE THAN $1,000"
 2 = " 2 LESS THAN $1,000"
 3 = " 3 JUST ABOUT $1,000" ;
```

```
VALUE W000049W
-7 = '-7 RF'
-8 = '-8 DK'
-1 = '-1 Inapplicable'
-9 = '-9 Missing'
 1 = " 1 MORE THAN $100"
 2 = " 2 LESS THAN $100"
 3 = " 3 JUST ABOUT $100" ;
```

```
VALUE W000050W
-7 = '-7 RF'
-8 = '-8 DK'
-1 = '-1 Inapplicable'
```

## SAS ALGORITHM FOR DEMENTIA

```
-9 = '-9 Missing'  
1 = " 1 YES"  
2 = " 2 NO"  
7 = " 7 YES, DOESNT KNOW HOW TO USE A COMPUTER" ;  
  
VALUE W000051W  
-7 = '-7 RF'  
-8 = '-8 DK'  
-1 = '-1 Inapplicable'  
-9 = '-9 Missing'  
1 = " 1 MOST DAYS"  
2 = " 2 SOME DAYS"  
3 = " 3 RARELY" ;  
  
VALUE W000052W  
-7 = '-7 RF'  
-8 = '-8 DK'  
-1 = '-1 Inapplicable'  
-9 = '-9 Missing'  
1 = " 1 EXCELLENT"  
2 = " 2 VERY GOOD"  
3 = " 3 GOOD"  
4 = " 4 FAIR"  
5 = " 5 POOR" ;  
  
VALUE W000053W  
-7 = '-7 RF'  
-8 = '-8 DK'  
-1 = '-1 Inapplicable'  
-9 = '-9 Missing'  
1 = " 1 YES"  
2 = " 2 NO"  
7 = " 7 DEAF" ;  
  
VALUE W000054W  
-7 = '-7 RF'  
-8 = '-8 DK'  
-1 = '-1 Inapplicable'  
-9 = '-9 Missing'  
1 = " 1 YES"  
2 = " 2 NO"  
7 = " 7 BLIND" ;  
  
VALUE W000055W  
-7 = '-7 RF'  
-8 = '-8 DK'  
-1 = '-1 Inapplicable'  
-9 = '-9 Missing'  
1 = " 1 EVERY DAY (7 DAYS A WEEK)"  
2 = " 2 MOST DAYS (5-6 DAYS A WEEK)"  
3 = " 3 SOME DAYS (2-4 DAYS A WEEK)"  
4 = " 4 RARELY (ONCE A WEEK OR LESS)"  
5 = " 5 NEVER" ;  
  
VALUE W000056W  
-7 = '-7 RF'  
-8 = '-8 DK'
```

## SAS ALGORITHM FOR DEMENTIA

```
-1 = '-1 Inapplicable'  
-9 = '-9 Missing'  
1 = " 1 BACK"  
2 = " 2 HIPS"  
3 = " 3 KNEES"  
4 = " 4 FEET"  
5 = " 5 HANDS"  
6 = " 6 WRISTS"  
7 = " 7 SHOULDERS"  
8 = " 8 HEAD"  
9 = " 9 NECK"  
10 = "10 ARMS"  
11 = "11 LEGS"  
12 = "12 STOMACH"  
91 = "91 OTHER PLACES (SPECIFY)" ;
```

VALUE W000057W

```
-7 = '-7 RF'  
-8 = '-8 DK'  
-1 = '-1 Inapplicable'  
-9 = '-9 Missing'  
1 = " 1 YES, A CHANGE"  
2 = " 2 NO, NO CHANGE"  
3 = " 3 DEMENTIA/ALZHEIMER'S REPORTED BY PROXY" ;
```

VALUE W000058W

```
-7 = '-7 RF'  
-8 = '-8 DK'  
-1 = '-1 Inapplicable'  
-9 = '-9 Missing'  
1 = " 1 SP HAS DEMENTIA/ALZHEIMER'S/ NOT ABLE"  
2 = " 2 SP IS UNABLE TO SPEAK"  
3 = " 3 SP IS UNABLE TO HEAR"  
4 = " 4 SP REFUSED"  
5 = " 5 PROXY REFUSED"  
6 = " 6 SP NOT PRESENT"  
7 = " 7 SP TOO ILL"  
8 = " 8 SP LANGUAGE BARRIER"  
91 = "91 OTHER (SPECIFY)" ;
```

VALUE W000059W

```
-7 = '-7 RF'  
-8 = '-8 DK'  
-1 = '-1 Inapplicable'  
-9 = '-9 Missing'  
1 = " 1 MUCH BETTER"  
2 = " 2 BETTER"  
3 = " 3 SAME"  
4 = " 4 WORSE"  
5 = " 5 MUCH WORSE" ;
```

VALUE W000060W

```
-7 = '-7 RF'  
-8 = '-8 DK'  
-1 = '-1 Inapplicable'  
-9 = '-9 Missing'  
1 = " 1 YES"
```

## SAS ALGORITHM FOR DEMENTIA

```
2 = " 2 NO/DON'T KNOW" ;

VALUE W000061W
-7 = '-7 RF'
-8 = '-8 DK'
-1 = '-1 Inapplicable'
-9 = '-9 Missing'
1 = " 1 CONTINUE WITH ACTIVITY"
2 = " 2 SP REFUSES ACTIVITY" ;

VALUE W000062W
-8 = '-8 DK'
-1 = '-1 Inapplicable'
-9 = '-9 Missing'
1 = " 1 Word[1]"
2 = " 2 Word[2]"
3 = " 3 Word[3]"
4 = " 4 Word[4]"
5 = " 5 Word[5]"
6 = " 6 Word[6]"
7 = " 7 Word[7]"
8 = " 8 Word[8]"
9 = " 9 Word[9]"
10 = "10 Word[10]"
91 = "91 NO WORDS REMEMBERED"
92 = "92 REFUSED" ;

VALUE W000063W
-7 = '-7 RF'
-8 = '-8 DK'
-1 = '-1 Inapplicable'
-9 = '-9 Missing'
1 = " 1 DIFFICULTY HEARING ANY OF THE WORDS"
2 = " 2 INTERRUPTION OCCURRED WHILE LIST WAS BEING READ"
91 = "91 OTHER PROBLEM (SPECIFY)"
92 = "92 NO PROBLEMS OCCURRED" ;

VALUE W000064W
-7 = '-7 RF'
-8 = '-8 DK'
-1 = '-1 Inapplicable'
-9 = '-9 Missing'
1 = " 1 SP ATTEMPTED CLOCK DRAWING"
2 = " 2 SP DID NOT ATTEMPT CLOCK DRAWING"
97 = "97 SP REFUSED CLOCK DRAWING" ;

VALUE W000065W
1 = "1 LAST NAME CORRECT"
2 = "2 LAST NAME NOT CORRECT/DK LAST NAME"
3 = "3 FIRST NAME CORRECT"
4 = "4 FIRST NAME NOT CORRECT/DK FIRST NAME" ;

VALUE W000066W
-7 = '-7 RF'
-8 = '-8 DK'
-1 = '-1 Inapplicable'
-9 = '-9 Missing'
```



## SAS ALGORITHM FOR DEMENTIA

```
1 = " 1 EVERY DAY (7 DAYS A WEEK)"
2 = " 2 MOST DAYS (5-6 DAYS A WEEK)"
3 = " 3 SOME DAYS (2-4 DAYS A WEEK)"
4 = " 4 RARELY (ONCE A WEEK OR LESS)"
5 = " 5 NEVER" ;

VALUE W000067W
-7 = '-7 RF'
-8 = '-8 DK'
-1 = '-1 Inapplicable'
-9 = '-9 Missing'
1 = " 1 EVERY TIME"
2 = " 2 MOST TIMES"
3 = " 3 SOMETIMES"
4 = " 4 RARELY"
5 = " 5 NEVER" ;

VALUE W000068W
1 = " 1 HelperMember: Person 1"
2 = " 2 HelperMember: Person 2"
3 = " 3 HelperMember: Person 3"
4 = " 4 HelperMember: Person 4"
5 = " 5 HelperMember: Person 5"
6 = " 6 HelperMember: Person 6"
7 = " 7 HelperMember: Person 7"
8 = " 8 HelperMember: Person 8"
9 = " 9 HelperMember: Person 9"
10 = "10 HelperMember: Person 10"
11 = "11 HelperMember: Person 11"
12 = "12 HelperMember: Person 12"
13 = "13 HelperMember: Person 13"
14 = "14 HelperMember: Person 14"
15 = "15 HelperMember: Person 15"
16 = "16 HelperMember: Person 16"
17 = "17 HelperMember: Person 17"
18 = "18 HelperMember: Person 18"
19 = "19 HelperMember: Person 19"
20 = "20 HelperMember: Person 20"
21 = "21 HelperMember: Person 21"
22 = "22 HelperMember: Person 22"
23 = "23 HelperMember: Person 23"
24 = "24 HelperMember: Person 24"
25 = "25 HelperMember: Person 25" ;

VALUE W000069W
-7 = '-7 RF'
-8 = '-8 DK'
-1 = '-1 Inapplicable'
-9 = '-9 Missing'
1 = " 1 MOST TIMES"
2 = " 2 SOMETIMES"
3 = " 3 RARELY"
4 = " 4 NEVER" ;

VALUE W000070W
-7 = '-7 RF'
-8 = '-8 DK'
```

## SAS ALGORITHM FOR DEMENTIA

```
-1 = '-1 Inapplicable'  
-9 = '-9 Missing'  
1 = " 1 NONE"  
2 = " 2 A LITTLE"  
3 = " 3 SOME"  
4 = " 4 A LOT" ;  
  
VALUE W000071W  
-7 = '-7 RF'  
-8 = '-8 DK'  
-1 = '-1 Inapplicable'  
-9 = '-9 Missing'  
1 = " 1 MORE OFTEN"  
2 = " 2 LESS OFTEN"  
3 = " 3 ABOUT THE SAME" ;  
  
VALUE W000072W  
-7 = '-7 RF'  
-8 = '-8 DK'  
-1 = '-1 Inapplicable'  
-9 = '-9 Missing'  
1 = " 1 YES, A YEAR OR MORE"  
2 = " 2 NO, LESS THAN A YEAR" ;  
  
VALUE W000073W  
-7 = '-7 RF'  
-8 = '-8 DK'  
-1 = '-1 Inapplicable'  
-9 = '-9 Missing'  
1 = " 1 JANUARY"  
2 = " 2 FEBRUARY"  
3 = " 3 MARCH"  
4 = " 4 APRIL"  
5 = " 5 MAY"  
6 = " 6 JUNE"  
7 = " 7 JULY"  
8 = " 8 AUGUST"  
9 = " 9 SEPTEMBER"  
10 = "10 OCTOBER"  
11 = "11 NOVEMBER"  
12 = "12 DECEMBER" ;  
  
VALUE W000074W  
-7 = '-7 RF'  
-8 = '-8 DK'  
-1 = '-1 Inapplicable'  
-9 = '-9 Missing'  
1 = " 1 MONTH AND YEAR"  
2 = " 2 NUMBER OF MONTHS AGO"  
3 = " 3 NUMBER OF YEARS AGO"  
4 = " 4 AGE WHEN LAST DROVE"  
7 = " 7 NEVER DROVE" ;  
  
VALUE W000075W  
-7 = '-7 RF'  
-8 = '-8 DK'  
-1 = '-1 Inapplicable'
```

## SAS ALGORITHM FOR DEMENTIA

```
-9 = '-9 Missing'
1 = " 1 YES"
2 = " 2 NO"
7 = " 7 {NO, NO RAIN OR BAD WEATHER}" ;

VALUE W000076W
-7 = '-7 RF'
-8 = '-8 DK'
-1 = '-1 Inapplicable'
-9 = '-9 Missing'
1 = " 1 ALWAYS DID IT BY SELF"
2 = " 2 ALWAYS DID IT TOGETHER WITH SOMEONE ELSE"
3 = " 3 SOMEONE ELSE ALWAYS DID IT"
4 = " 4 IT VARIED (MORE THAN ONE WAY)"
5 = " 5 NOT DONE IN LAST MONTH" ;

VALUE W000077W
-7 = '-7 RF'
-8 = '-8 DK'
-1 = '-1 Inapplicable'
-9 = '-9 Missing'
1 = " 1 MACHINE IN HOME"
2 = " 2 MACHINE ELSEWHERE IN BUILDING"
3 = " 3 LAUNDROMAT"
4 = " 4 SINK IN HOME"
5 = " 5 SINK ELSEWHERE IN BUILDING"
91 = "91 OTHER (SPECIFY)" ;

VALUE W000078W
-7 = '-7 RF'
-8 = '-8 DK'
-1 = '-1 Inapplicable'
-9 = '-9 Missing'
1 = " 1 HEALTH OR FUNCTIONING (INCLUDES AGE, MEMORY, VISION, HEALTH
CONDITION/DISEASE NAMES, SURGERY, UNABLE TO DRIVE)"
2 = " 2 OTHER REASON (INCLUDES SHARED ACTIVITY, ALWAYS DONE THIS WAY,
SOMEONE ELSE WANTED TO DO IT, PAY SOMEONE, DOESNT LIKE TO D"
;

VALUE W000079W
-7 = '-7 RF'
-8 = '-8 DK'
-1 = '-1 Inapplicable'
-9 = '-9 Missing'
1 = " 1 MORE OFTEN"
2 = " 2 LESS OFTEN"
3 = " 3 SAME" ;

VALUE W000080W
-7 = '-7 RF'
-8 = '-8 DK'
-1 = '-1 Inapplicable'
-9 = '-9 Missing'
1 = " 1 CASH"
2 = " 2 CHECK"
3 = " 3 DEBIT OR GIFT CARD"
4 = " 4 CREDIT CARD"
```

## SAS ALGORITHM FOR DEMENTIA

```
5 = " 5 FOOD STAMPS"
6 = " 6 SOMEONE ELSE PAYS"
91 = "91 OTHER" ;

VALUE W000081W
-7 = '-7 RF'
-8 = '-8 DK'
-1 = '-1 Inapplicable'
-9 = '-9 Missing'
1 = " 1 {DROVE}"
2 = " 2 GOT A RIDE FROM A FAMILY MEMBER OR FRIEND OR SOMEONE PAID TO
HELP"
3 = " 3 {USED A VAN OR SHUTTLE SERVICE PROVIDED BY THE PLACE SP LIVES}"
4 = " 4 USED A VAN OR SHUTTLE SERVICE FOR PEOPLE WITH DISABILITIES OR
SENIORS {NOT PROVIDED BY THE PLACE SP LIVES}"
5 = " 5 TOOK PUBLIC TRANSPORTATION (THE BUS, SUBWAY, TRAIN, OR TRAM)"
6 = " 6 TOOK A TAXI"
7 = " 7 WALKED"
8 = " 8 HOME VISIT"
91 = "91 OTHER (SPECIFY)" ;

VALUE W000082W
1 = " 1 HelperMeals: Person 1"
2 = " 2 HelperMeals: Person 2"
3 = " 3 HelperMeals: Person 3"
4 = " 4 HelperMeals: Person 4"
5 = " 5 HelperMeals: Person 5"
6 = " 6 HelperMeals: Person 6"
7 = " 7 HelperMeals: Person 7"
8 = " 8 HelperMeals: Person 8"
9 = " 9 HelperMeals: Person 9"
10 = "10 HelperMeals: Person 10"
11 = "11 HelperMeals: Person 11"
12 = "12 HelperMeals: Person 12"
13 = "13 HelperMeals: Person 13"
14 = "14 HelperMeals: Person 14"
15 = "15 HelperMeals: Person 15"
16 = "16 HelperMeals: Person 16"
17 = "17 HelperMeals: Person 17"
18 = "18 HelperMeals: Person 18"
19 = "19 HelperMeals: Person 19"
20 = "20 HelperMeals: Person 20"
21 = "21 HelperMeals: Person 21"
22 = "22 HelperMeals: Person 22"
23 = "23 HelperMeals: Person 23"
24 = "24 HelperMeals: Person 24"
25 = "25 HelperMeals: Person 25" ;

VALUE W000083W
-7 = '-7 RF'
-8 = '-8 DK'
-1 = '-1 Inapplicable'
-9 = '-9 Missing'
1 = " 1 YES"
2 = " 2 NO"
7 = " 7 ALWAYS FED THROUGH IV OR TUBE" ;
```

## SAS ALGORITHM FOR DEMENTIA

VALUE W000084W

-7 = '-7 RF'  
-8 = '-8 DK'  
-1 = '-1 Inapplicable'  
-9 = '-9 Missing'  
1 = " 1 EVERY TIME"  
2 = " 2 MOST TIMES"  
3 = " 3 SOMETIMES"  
4 = " 4 RARELY" ;

VALUE W000085W

-7 = '-7 RF'  
-8 = '-8 DK'  
-1 = '-1 Inapplicable'  
-9 = '-9 Missing'  
1 = " 1 SHOWERED"  
2 = " 2 TOOK BATHS IN A TUB"  
3 = " 3 WASHED UP SOME OTHER WAY" ;

VALUE W000086W

-7 = '-7 RF'  
-8 = '-8 DK'  
-1 = '-1 Inapplicable'  
-9 = '-9 Missing'  
1 = " 1 {SHOWERING}"  
2 = " 2 {TAKING BATHS}"  
3 = " 3 {WASHING UP SOME OTHER WAY}" ;

VALUE W000087W

-7 = '-7 RF'  
-8 = '-8 DK'  
-1 = '-1 Inapplicable'  
-9 = '-9 Missing'  
1 = " 1 LOCAL STORE OR PHARMACY"  
2 = " 2 BY MAIL"  
3 = " 3 HEALTHCARE PROVIDER/HOSPITAL"  
91 = "91 SOMEWHERE ELSE (SPECIFY)" ;

VALUE W000088W

-7 = '-7 RF'  
-8 = '-8 DK'  
-1 = '-1 Inapplicable'  
-9 = '-9 Missing'  
1 = " 1 PICKED THEM UP BY SELF"  
2 = " 2 HAD THEM DELIVERED"  
3 = " 3 HAD SOMEONE ELSE PICK THEM UP" ;

VALUE W000089W

-7 = '-7 RF'  
-8 = '-8 DK'  
-1 = '-1 Inapplicable'  
-9 = '-9 Missing'  
1 = " 1 ^fdrove"  
2 = " 2 GOT A RIDE FROM A FAMILY MEMBER OR FRIEND OR SOMEONE PAID TO  
HELP"  
3 = " 3 ^fservice"  
4 = " 4 ^fnotprov"

## SAS ALGORITHM FOR DEMENTIA

```
5 = " 5 TOOK PUBLIC TRANSPORTATION (THE BUS, SUBWAY, TRAIN, OR TRAM)"  
6 = " 6 TOOK A TAXI"  
91 = "91 OTHER (SPECIFY)" ;
```

```
VALUE W000090W  
1 = " 1 HelperSatInwDoctor: Person 1"  
2 = " 2 HelperSatInwDoctor: Person 2"  
3 = " 3 HelperSatInwDoctor: Person 3"  
4 = " 4 HelperSatInwDoctor: Person 4"  
5 = " 5 HelperSatInwDoctor: Person 5"  
6 = " 6 HelperSatInwDoctor: Person 6"  
7 = " 7 HelperSatInwDoctor: Person 7"  
8 = " 8 HelperSatInwDoctor: Person 8"  
9 = " 9 HelperSatInwDoctor: Person 9"  
10 = "10 HelperSatInwDoctor: Person 10"  
11 = "11 HelperSatInwDoctor: Person 11"  
12 = "12 HelperSatInwDoctor: Person 12"  
13 = "13 HelperSatInwDoctor: Person 13"  
14 = "14 HelperSatInwDoctor: Person 14"  
15 = "15 HelperSatInwDoctor: Person 15"  
16 = "16 HelperSatInwDoctor: Person 16"  
17 = "17 HelperSatInwDoctor: Person 17"  
18 = "18 HelperSatInwDoctor: Person 18"  
19 = "19 HelperSatInwDoctor: Person 19"  
20 = "20 HelperSatInwDoctor: Person 20"  
21 = "21 HelperSatInwDoctor: Person 21"  
22 = "22 HelperSatInwDoctor: Person 22"  
23 = "23 HelperSatInwDoctor: Person 23"  
24 = "24 HelperSatInwDoctor: Person 24"  
25 = "25 HelperSatInwDoctor: Person 25" ;
```

```
VALUE W000091W  
-7 = '-7 RF'  
-8 = '-8 DK'  
-1 = '-1 Inapplicable'  
-9 = '-9 Missing'  
1 = " 1 VERY IMPORTANT"  
2 = " 2 SOMEWHAT IMPORTANT"  
3 = " 3 NOT SO IMPORTANT" ;
```

```
VALUE W000092W  
-7 = '-7 RF'  
-8 = '-8 DK'  
-1 = '-1 Inapplicable'  
-9 = '-9 Missing'  
1 = " 1 YES"  
2 = " 2 NO"  
3 = " 3 CAN'T DO/DON'T DO" ;
```

```
VALUE W000093W  
-7 = '-7 RF'  
-8 = '-8 DK'  
-1 = '-1 Inapplicable'  
-9 = '-9 Missing'  
1 = " 1 LEFT"  
2 = " 2 RIGHT"  
3 = " 3 BOTH" ;
```

## SAS ALGORITHM FOR DEMENTIA

```
VALUE W000094W
-7 = '-7 RF'
-8 = '-8 DK'
-1 = '-1 Inapplicable'
-9 = '-9 Missing'
 1 = " 1 LEFT SIDE"
 2 = " 2 RIGHT SIDE"
 3 = " 3 BOTH SIDES"      ;

VALUE W000095W
-7 = '-7 RF'
-8 = '-8 DK'
-1 = '-1 Inapplicable'
-9 = '-9 Missing'
 1 = " 1 ONE SIDE"
 2 = " 2 BOTH SIDES"      ;

VALUE W000096W
-7 = '-7 RF'
-8 = '-8 DK'
-1 = '-1 Inapplicable'
-9 = '-9 Missing'
 1 = " 1 WELL OFF"
 2 = " 2 ABOVE AVERAGE"
 3 = " 3 AVERAGE"
 4 = " 4 BELOW AVERAGE"
 5 = " 5 POOR"           ;

VALUE W000097W
-7 = '-7 RF'
-8 = '-8 DK'
-1 = '-1 Inapplicable'
-9 = '-9 Missing'
 1 = " 1 MOTHER ONLY"
 2 = " 2 FATHER ONLY"
 3 = " 3 ANOTHER RELATIVE"
 4 = " 4 NON-RELATIVES"
 5 = " 5 VARIED/MOVED AROUND"      ;

VALUE W000098W
 1 = " 1 Contact: Person 1"
 2 = " 2 Contact: Person 2"
 3 = " 3 Contact: Person 3"
 4 = " 4 Contact: Person 4"
 5 = " 5 Contact: Person 5"
 6 = " 6 Contact: Person 6"
 7 = " 7 Contact: Person 7"
 8 = " 8 Contact: Person 8"
 9 = " 9 Contact: Person 9"
10 = "10 Contact: Person 10"
11 = "11 Contact: Person 11"
12 = "12 Contact: Person 12"
13 = "13 Contact: Person 13"
14 = "14 Contact: Person 14"
15 = "15 Contact: Person 15"
16 = "16 Contact: Person 16"
```

## SAS ALGORITHM FOR DEMENTIA

```
17 = "17 Contact: Person 17"  
18 = "18 Contact: Person 18"  
19 = "19 Contact: Person 19"  
20 = "20 Contact: Person 20"  
21 = "21 Contact: Person 21"  
22 = "22 Contact: Person 22" ;  
  
VALUE W000099W  
-7 = '-7 RF'  
-8 = '-8 DK'  
-1 = '-1 Inapplicable'  
-9 = '-9 Missing'  
1 = " 1 AGREE A LOT"  
2 = " 2 AGREE A LITTLE"  
3 = " 3 DO NOT AGREE" ;  
  
VALUE W000100W  
-7 = '-7 RF'  
-8 = '-8 DK'  
-1 = '-1 Inapplicable'  
-9 = '-9 Missing'  
1 = " 1 WHITE/CAUCASIAN"  
2 = " 2 BLACK/AFRICAN AMERICAN"  
3 = " 3 AMERICAN INDIAN"  
4 = " 4 ALASKA NATIVE"  
5 = " 5 ASIAN"  
6 = " 6 NATIVE HAWAIIAN"  
7 = " 7 PACIFIC ISLANDER"  
8 = " 8 OTHER (SPECIFY)" ;  
  
VALUE W000101W  
-7 = '-7 RF'  
-8 = '-8 DK'  
-1 = '-1 Inapplicable'  
-9 = '-9 Missing'  
1 = " 1 {WHITE}"  
2 = " 2 {BLACK}"  
3 = " 3 {AMERICAN INDIAN}"  
4 = " 4 {ALASKAN NATIVE}"  
5 = " 5 {ASIAN}"  
6 = " 6 {NATIVE HAWAIIAN}"  
7 = " 7 {PACIFIC ISLANDER}"  
8 = " 8 {OTHER}" ;  
  
VALUE W000102W  
-7 = '-7 RF'  
-8 = '-8 DK'  
-1 = '-1 Inapplicable'  
-9 = '-9 Missing'  
1 = " 1 MEXICAN AMERICAN/CHICANO"  
2 = " 2 PUERTO RICAN"  
3 = " 3 CUBAN AMERICAN"  
4 = " 4 OTHER (SPECIFY)" ;  
  
VALUE W000103W  
-7 = '-7 RF'  
-8 = '-8 DK'
```



## SAS ALGORITHM FOR DEMENTIA

```
-1 = '-1 Inapplicable'  
-9 = '-9 Missing'  
1 = " 1 VERY WELL"  
2 = " 2 WELL"  
3 = " 3 NOT WELL"  
4 = " 4 NOT AT ALL" ;  
  
VALUE W000104W  
-7 = '-7 RF'  
-8 = '-8 DK'  
-1 = '-1 Inapplicable'  
-9 = '-9 Missing'  
1 = " 1 NOVEMBER 1941 OR EARLIER"  
2 = " 2 WORLD WAR II (DECEMBER 1941-DECEMBER 1946)"  
3 = " 3 JANUARY 1947 - JUNE 1950"  
4 = " 4 KOREAN WAR (JULY 1950 - JANUARY 1955)"  
5 = " 5 FEBRUARY 1955 - JULY 1964"  
6 = " 6 VIETNAM ERA (AUGUST 1964 - APRIL 1975)"  
7 = " 7 MAY 1975 - JULY 1990"  
8 = " 8 AUGUST 1990 - AUGUST 2001 (INCLUDING PERSIAN GULF WAR)"  
9 = " 9 SEPTEMBER 2001 OR LATER" ;  
  
VALUE W000105W  
-7 = '-7 RF'  
-8 = '-8 DK'  
-1 = '-1 Inapplicable'  
-9 = '-9 Missing'  
1 = " 1 AGREE A LOT"  
2 = " 2 AGREE A LITTLE"  
3 = " 3 AGREE NOT AT ALL" ;  
  
VALUE W000106W  
-7 = '-7 RF'  
-8 = '-8 DK'  
-1 = '-1 Inapplicable'  
-9 = '-9 Missing'  
1 = " 1 NURSING HOME CARE"  
2 = " 2 ASSISTED LIVING"  
3 = " 3 CARE BY HOME HEALTH PROVIDERS IN HOME" ;  
  
VALUE W000107W  
-7 = '-7 RF'  
-8 = '-8 DK'  
-1 = '-1 Inapplicable'  
-9 = '-9 Missing'  
1 = " 1 less than $1,000,"  
2 = " 2 $1,000 to less than $2,000,"  
3 = " 3 $2,000 to less than $3,000,"  
4 = " 4 $3,000 to less than $5,000, or"  
5 = " 5 $5,000 or more?" ;  
  
VALUE W000108W  
-7 = '-7 RF'  
-8 = '-8 DK'  
-1 = '-1 Inapplicable'  
-9 = '-9 Missing'  
1 = " 1 NUMBER OF YEARS"
```

## SAS ALGORITHM FOR DEMENTIA

```
2 = " 2 AGE" ;

VALUE W000109W
-7 = '-7 RF'
-8 = '-8 DK'
-1 = '-1 Inapplicable'
-9 = '-9 Missing'
1 = " 1 YES"
2 = " 2 NO"
3 = " 3 RETIRED/DON'T WORK ANYMORE" ;

VALUE W000110W
-7 = '-7 RF'
-8 = '-8 DK'
-1 = '-1 Inapplicable'
-9 = '-9 Missing'
1 = " 1 EVERY WEEK"
2 = " 2 EVERY TWO WEEKS"
3 = " 3 TWO TIMES A MONTH"
4 = " 4 OTHER SCHEDULE (SPECIFY)" ;

VALUE W000111W
-7 = '-7 RF'
-8 = '-8 DK'
-1 = '-1 Inapplicable'
-9 = '-9 Missing'
1 = " 1 ENTER PAYCHECK AMOUNT"
2 = " 2 ENTER PAY PER HOUR"
3 = " 3 ENTER PAY PER DAY" ;

VALUE W000112W
-7 = '-7 RF'
-8 = '-8 DK'
-1 = '-1 Inapplicable'
-9 = '-9 Missing'
1 = " 1 ENTER OCCUPATION"
2 = " 2 NEVER WORKED ENTIRE LIFE"
3 = " 3 HOMEMAKER/RAISED CHILDREN/WORKED IN THE HOME" ;

VALUE W000113W
-7 = '-7 RF'
-8 = '-8 DK'
-1 = '-1 Inapplicable'
-9 = '-9 Missing'
1 = " 1 SAME KIND OF WORK"
2 = " 2 SOMETHING DIFFERENT" ;

VALUE W000114W
-7 = '-7 RF'
-8 = '-8 DK'
-1 = '-1 Inapplicable'
-9 = '-9 Missing'
1 = " 1 OWN"
2 = " 2 RENT"
3 = " 3 SOME OTHER ARRANGEMENT" ;

VALUE W000115W
```

## SAS ALGORITHM FOR DEMENTIA

```
-7 = '-7 RF'
-8 = '-8 DK'
-1 = '-1 Inapplicable'
-9 = '-9 Missing'
 1 = " 1 PAID OFF"
 2 = " 2 STILL MAKE PAYMENTS"
 3 = " 3 REVERSE MORTGAGE" ;

VALUE W000116W
-7 = '-7 RF'
-8 = '-8 DK'
-1 = '-1 Inapplicable'
-9 = '-9 Missing'
 1 = " 1 less than $250,"
 2 = " 2 $250-$499,"
 3 = " 3 $500-$999, or"
 4 = " 4 $1,000 or more?" ;

VALUE W000117W
-7 = '-7 RF'
-8 = '-8 DK'
-1 = '-1 Inapplicable'
-9 = '-9 Missing'
 1 = " 1 5 YEARS"
 2 = " 2 10 YEARS"
 3 = " 3 LONGER THAN 10 YEARS" ;

VALUE W000118W
-7 = '-7 RF'
-8 = '-8 DK'
-1 = '-1 Inapplicable'
-9 = '-9 Missing'
 1 = " 1 less than $50,000,"
 2 = " 2 between $50,000 and $100,000, or"
 3 = " 3 over $100,000?" ;

VALUE W000119W
-7 = '-7 RF'
-8 = '-8 DK'
-1 = '-1 Inapplicable'
-9 = '-9 Missing'
 1 = " 1 less than $50,000,"
 2 = " 2 $50,000-$74,999,"
 3 = " 3 $75,000-$99,999,"
 4 = " 4 $100,000-$199,999,"
 5 = " 5 $200,000-$299,999,"
 6 = " 6 $300,000-$499,999,"
 7 = " 7 $500,000-$749,999, or"
 8 = " 8 $750,000 or more?" ;

VALUE W000120W
-7 = '-7 RF'
-8 = '-8 DK'
-1 = '-1 Inapplicable'
-9 = '-9 Missing'
 1 = " 1 YES, SP RECEIVED PAYMENT FROM SOURCE"
```

## SAS ALGORITHM FOR DEMENTIA

```
2 = " 2 ^HH.fOption2Response"  
3 = " 3 NO PAYMENT RECEIVED FROM THIS SOURCE" ;  
  
VALUE W000121W  
-7 = '-7 RF'  
-8 = '-8 DK'  
-1 = '-1 Inapplicable'  
-9 = '-9 Missing'  
1 = " 1 MAIL"  
2 = " 2 DIRECT DEPOSIT" ;  
  
VALUE W000122W  
-7 = '-7 RF'  
-8 = '-8 DK'  
-1 = '-1 Inapplicable'  
-9 = '-9 Missing'  
1 = " 1 YES, SP HAS 401K, 403B, IRA, OR KEOGH"  
2 = " 2 ^HH.fOption2ResponseIA7"  
3 = " 3 NO ACCOUNTS OF THIS TYPE" ;  
  
VALUE W000123W  
-7 = '-7 RF'  
-8 = '-8 DK'  
-1 = '-1 Inapplicable'  
-9 = '-9 Missing'  
1 = " 1 YES, SP HAS ASSET"  
2 = " 2 ^HH.fOption2ResponseIA8"  
3 = " 3 ^HH.fOption3Response"  
4 = " 4 NO ASSET OF THIS TYPE" ;  
  
VALUE W000124W  
-7 = '-7 RF'  
-8 = '-8 DK'  
-1 = '-1 Inapplicable'  
-9 = '-9 Missing'  
1 = " 1 YES, SP HAS ASSET"  
2 = " 2 ^HH.fOption2ResponseIA8"  
3 = " 3 ^HH.fOption3Response"  
4 = " 4 NO ASSETS OF THIS TYPE" ;  
  
VALUE W000125W  
-7 = '-7 RF'  
-8 = '-8 DK'  
-1 = '-1 Inapplicable'  
-9 = '-9 Missing'  
1 = " 1 ENTER COMBINED AMOUNT"  
2 = " 2 ENTER SP AND SPOUSE/PARTNER AMOUNTS SEPARATELY" ;  
  
VALUE W000126W  
-7 = '-7 RF'  
-8 = '-8 DK'  
-1 = '-1 Inapplicable'  
-9 = '-9 Missing'  
1 = " 1 less than $1,200,"  
2 = " 2 $1,200-$1,599,"  
3 = " 3 $1,600-$1,999,"  
4 = " 4 $2,000-$2,499, or"
```

## SAS ALGORITHM FOR DEMENTIA

```
5 = " 5 $2,500 or more?" ;

VALUE W000127W
-7 = '-7 RF'
-8 = '-8 DK'
-1 = '-1 Inapplicable'
-9 = '-9 Missing'
1 = " 1 less than $600,"
2 = " 2 $600-$899,"
3 = " 3 $900-$1,099,"
4 = " 4 $1,100-$1,499, or"
5 = " 5 $1,500 or more?" ;

VALUE W000128W
-7 = '-7 RF'
-8 = '-8 DK'
-1 = '-1 Inapplicable'
-9 = '-9 Missing'
1 = " 1 less than $300,"
2 = " 2 $300-$699,"
3 = " 3 $700-$999, or"
4 = " 4 $1000 or more?" ;

VALUE W000129W
-7 = '-7 RF'
-8 = '-8 DK'
-1 = '-1 Inapplicable'
-9 = '-9 Missing'
1 = " 1 less than $100,"
2 = " 2 $100-$199,"
3 = " 3 $200-$399,"
4 = " 4 $400-$699, or"
5 = " 5 $700 or more?" ;

VALUE W000130W
-7 = '-7 RF'
-8 = '-8 DK'
-1 = '-1 Inapplicable'
-9 = '-9 Missing'
1 = " 1 less than $600,"
2 = " 2 $600-$799,"
3 = " 3 $800-$999,"
4 = " 4 $1000-$1199, or"
5 = " 5 $1200 or more?" ;

VALUE W000131W
-7 = '-7 RF'
-8 = '-8 DK'
-1 = '-1 Inapplicable'
-9 = '-9 Missing'
1 = " 1 less than $500,"
2 = " 2 $500-$699,"
3 = " 3 $700-$899,"
4 = " 4 $900-$1,099, or"
5 = " 5 $1,100 or more?" ;

VALUE W000132W
```

## SAS ALGORITHM FOR DEMENTIA

```
-7 = '-7 RF'
-8 = '-8 DK'
-1 = '-1 Inapplicable'
-9 = '-9 Missing'
 1 = " 1 less than $600,"
 2 = " 2 $600-$1,099,"
 3 = " 3 $1,100-$2,099,"
 4 = " 4 $2,100-$4,499, or"
 5 = " 5 $4,500 or more?" ;

VALUE W000133W
-7 = '-7 RF'
-8 = '-8 DK'
-1 = '-1 Inapplicable'
-9 = '-9 Missing'
 1 = " 1 less than $400,"
 2 = " 2 $400-$799,"
 3 = " 3 $800-$1,499,"
 4 = " 4 $1,500-$3,399, or"
 5 = " 5 $3,400 or more?" ;

VALUE W000134W
-7 = '-7 RF'
-8 = '-8 DK'
-1 = '-1 Inapplicable'
-9 = '-9 Missing'
 1 = " 1 less than $16,000,"
 2 = " 2 $16,000-$49,999,"
 3 = " 3 $50,000-$118,999,"
 4 = " 4 $119,000-$224,999, or"
 5 = " 5 $225,000 or more?" ;

VALUE W000135W
-7 = '-7 RF'
-8 = '-8 DK'
-1 = '-1 Inapplicable'
-9 = '-9 Missing'
 1 = " 1 less than $10,000,"
 2 = " 2 $10,000-$27,999,"
 3 = " 3 $28,000-$54,999,"
 4 = " 4 $55,000-$143,999, or"
 5 = " 5 $144,000 or more?" ;

VALUE W000136W
-7 = '-7 RF'
-8 = '-8 DK'
-1 = '-1 Inapplicable'
-9 = '-9 Missing'
 1 = " 1 less than $200,"
 2 = " 2 $200-$299,"
 3 = " 3 $300-$699,"
 4 = " 4 $700-$1,499, or"
 5 = " 5 $1,500 or more?" ;

VALUE W000137W
-7 = '-7 RF'
-8 = '-8 DK'
```

## SAS ALGORITHM FOR DEMENTIA

```
-1 = '-1 Inapplicable'
-9 = '-9 Missing'
 1 = " 1 less than $100,"
 2 = " 2 $100-$199,"
 3 = " 3 $200-$399,"
 4 = " 4 $400-$1,099, or"
 5 = " 5 $1,100 or more?" ;

VALUE W000138W
-7 = '-7 RF'
-8 = '-8 DK'
-1 = '-1 Inapplicable'
-9 = '-9 Missing'
 1 = " 1 less than $2,400,"
 2 = " 2 $2,400-$3,599,"
 3 = " 3 $3,600-$8,399,"
 4 = " 4 $8,400-$17,999, or"
 5 = " 5 $18,000 or more?" ;

VALUE W000139W
-7 = '-7 RF'
-8 = '-8 DK'
-1 = '-1 Inapplicable'
-9 = '-9 Missing'
 1 = " 1 less than $1,200,"
 2 = " 2 $1,200-$2,399,"
 3 = " 3 $2,400-$4,799,"
 4 = " 4 $4,800-$13,199, or"
 5 = " 5 $13,200 or more?" ;

VALUE W000140W
-7 = '-7 RF'
-8 = '-8 DK'
-1 = '-1 Inapplicable'
-9 = '-9 Missing'
 1 = " 1 less than $62,000,"
 2 = " 2 $62,000-$85,999,"
 3 = " 3 $86,000-$149,999,"
 4 = " 4 $150,000-$434,999, or"
 5 = " 5 $435,000 or more?" ;

VALUE W000141W
-7 = '-7 RF'
-8 = '-8 DK'
-1 = '-1 Inapplicable'
-9 = '-9 Missing'
 1 = " 1 less than $1,000,"
 2 = " 2 $1,000-$1,999,"
 3 = " 3 $2,000-$19,999,"
 4 = " 4 $20,000-$49,999, or"
 5 = " 5 $50,000 or more?" ;

VALUE W000142W
-7 = '-7 RF'
-8 = '-8 DK'
-1 = '-1 Inapplicable'
```

## SAS ALGORITHM FOR DEMENTIA

```
-9 = '-9 Missing'  
1 = " 1 less than $77,000,"  
2 = " 2 $77,000-$79,999,"  
3 = " 3 $80,000-$171,999,"  
4 = " 4 $172,000-$199,999, or"  
5 = " 5 $200,000 or more?" ;
```

VALUE W000143W

```
-7 = '-7 RF'  
-8 = '-8 DK'  
-1 = '-1 Inapplicable'  
-9 = '-9 Missing'  
1 = " 1 less than $1,000,"  
2 = " 2 $1,000-$15,999,"  
3 = " 3 $16,000-$33,999,"  
4 = " 4 $34,000-$55,999, or"  
5 = " 5 $56,000 or more?" ;
```

VALUE W000144W

```
-7 = '-7 RF'  
-8 = '-8 DK'  
-1 = '-1 Inapplicable'  
-9 = '-9 Missing'  
1 = " 1 less than $11,000,"  
2 = " 2 $11,000-$22,999,"  
3 = " 3 $23,000-$44,999,"  
4 = " 4 $45,000-$112,999, or"  
5 = " 5 $113,000 or more?" ;
```

VALUE W000145W

```
-7 = '-7 RF'  
-8 = '-8 DK'  
-1 = '-1 Inapplicable'  
-9 = '-9 Missing'  
1 = " 1 less than $1,000,"  
2 = " 2 $1,000-$5,999,"  
3 = " 3 $6,000-$13,999,"  
4 = " 4 $14,000-$35,999, or"  
5 = " 5 $36,000 or more?" ;
```

VALUE W000146W

```
-7 = '-7 RF'  
-8 = '-8 DK'  
-1 = '-1 Inapplicable'  
-9 = '-9 Missing'  
1 = " 1 less than $10,000,"  
2 = " 2 $10,000-$22,999,"  
3 = " 3 $23,000-$55,999,"  
4 = " 4 $56,000-$80,999, or"  
5 = " 5 $81,000 or more?" ;
```

VALUE W000147W

```
-7 = '-7 RF'  
-8 = '-8 DK'  
-1 = '-1 Inapplicable'  
-9 = '-9 Missing'  
1 = " 1 less than $600,"
```



## SAS ALGORITHM FOR DEMENTIA

```
2 = " 2 $600-$999,"
3 = " 3 $1,000-$2,999,"
4 = " 4 $3,000-$10,999, or"
5 = " 5 $11,000 or more?" ;

VALUE W000148W
-7 = '-7 RF'
-8 = '-8 DK'
-1 = '-1 Inapplicable'
-9 = '-9 Missing'
1 = " 1 less than $500,"
2 = " 2 $500-$999,"
3 = " 3 $1,000-$3,999,"
4 = " 4 $4,000-$15,999, or"
5 = " 5 $16,000 or more?" ;

VALUE W000149W
-7 = '-7 RF'
-8 = '-8 DK'
-1 = '-1 Inapplicable'
-9 = '-9 Missing'
1 = " 1 less than $200,"
2 = " 2 $200-$999,"
3 = " 3 $1,000-$3,999,"
4 = " 4 $4,000-$6,999, or"
5 = " 5 $7,000 or more?" ;

VALUE W000150W
-7 = '-7 RF'
-8 = '-8 DK'
-1 = '-1 Inapplicable'
-9 = '-9 Missing'
1 = " 1 less than $30,000,"
2 = " 2 $30,000-$151,999,"
3 = " 3 $152,000-$367,999,"
4 = " 4 $368,000-$956,999, or"
5 = " 5 $957,000 or more?" ;

VALUE W000151W
-7 = '-7 RF'
-8 = '-8 DK'
-1 = '-1 Inapplicable'
-9 = '-9 Missing'
1 = " 1 less than $30,000,"
2 = " 2 $30,000-$88,999,"
3 = " 3 $89,000-$295,999,"
4 = " 4 $296,000-$360,999, or"
5 = " 5 $361,000 or more?" ;

VALUE W000152W
-7 = '-7 RF'
-8 = '-8 DK'
-1 = '-1 Inapplicable'
-9 = '-9 Missing'
1 = " 1 less than $7,200,"
2 = " 2 $7,200-$16,799,"
3 = " 3 $16,800-$40,799,"
```

## SAS ALGORITHM FOR DEMENTIA

```
4 = " 4 $40,800-$86,399, or"  
5 = " 5 $86,400 or more?" ;  
  
VALUE W000153W  
-7 = '-7 RF'  
-8 = '-8 DK'  
-1 = '-1 Inapplicable'  
-9 = '-9 Missing'  
1 = " 1 less than $6,000,"  
2 = " 2 $6,000-$11,999,"  
3 = " 3 $12,000-$23,999,"  
4 = " 4 $24,000-$47,999, or"  
5 = " 5 $48,000 or more?" ;  
  
VALUE W000154W  
-7 = '-7 RF'  
-8 = '-8 DK'  
-1 = '-1 Inapplicable'  
-9 = '-9 Missing'  
1 = " 1 less than $27,600,"  
2 = " 2 $27,600-$41,999,"  
3 = " 3 $42,000-$63,999,"  
4 = " 4 $64,000-$107,999, or"  
5 = " 5 $108,000 or more?" ;  
  
VALUE W000155W  
-7 = '-7 RF'  
-8 = '-8 DK'  
-1 = '-1 Inapplicable'  
-9 = '-9 Missing'  
1 = " 1 less than $14,000,"  
2 = " 2 $14,000-$21,999,"  
3 = " 3 $22,000-$35,999,"  
4 = " 4 $36,000-$48,999, or"  
5 = " 5 $49,000 or more?" ;  
  
VALUE W000156W  
-7 = '-7 RF'  
-8 = '-8 DK'  
-1 = '-1 Inapplicable'  
-9 = '-9 Missing'  
1 = " 1 less than $2,500,"  
2 = " 2 $2,500-$4,999,"  
3 = " 3 $5,000-$7,499,"  
4 = " 4 $7,500-$9,999,"  
5 = " 5 $10,000-$19,999, or"  
6 = " 6 $20,000 or more?" ;  
  
VALUE W000157W  
-7 = '-7 RF'  
-8 = '-8 DK'  
-1 = '-1 Inapplicable'  
-9 = '-9 Missing'  
1 = " 1 PAY OFF BALANCE"  
2 = " 2 PAY MINIMUM"  
3 = " 3 PAY MORE THAN MINIMUM, BUT NOT ENTIRE BALANCE"  
4 = " 4 DON'T HAVE ANY CREDIT CARDS" ;
```

## SAS ALGORITHM FOR DEMENTIA

```
VALUE W000158W
-7 = '-7 RF'
-8 = '-8 DK'
-1 = '-1 Inapplicable'
-9 = '-9 Missing'
1 = " 1 less than $1,000,"
2 = " 2 over $1,000 but less than $2,000,"
3 = " 3 over $2,000 but less than $4,000,"
4 = " 4 over $4,000 but less than $6,000,"
5 = " 5 over $6,000 but less than $10,000,"
6 = " 6 over $10,000 but less than $20,000, or"
7 = " 7 $20,000 or more?" ;
```

```
VALUE W000159W
-7 = '-7 RF'
-8 = '-8 DK'
-1 = '-1 Inapplicable'
-9 = '-9 Missing'
1 = " 1 MOST"
2 = " 2 SOME"
3 = " 3 A LITTLE" ;
```

```
VALUE W000160W
-7 = '-7 RF'
-8 = '-8 DK'
-1 = '-1 Inapplicable'
-9 = '-9 Missing'
1 = " 1 less than $500,"
2 = " 2 over $500 but less than $1,000,"
3 = " 3 over $1,000 but less than $2,000,"
4 = " 4 over $2,000 but less than $4,000,"
5 = " 5 over $4,000 but less than $6,000,"
6 = " 6 over $6,000 but less than $10,000,"
7 = " 7 over $10,000 but less than $20,000, or"
8 = " 8 $20,000 or more?" ;
```

```
VALUE W000161W
-7 = '-7 RF'
-8 = '-8 DK'
-1 = '-1 Inapplicable'
-9 = '-9 Missing'
1 = " 1 CHILD/CHILDREN"
2 = " 2 SOMEONE ELSE" ;
```

```
VALUE W000162W
-7 = '-7 RF'
-8 = '-8 DK'
-1 = '-1 Inapplicable'
-9 = '-9 Missing'
1 = " 1 HelperChildRel: Person 1"
2 = " 2 HelperChildRel: Person 2"
3 = " 3 HelperChildRel: Person 3"
4 = " 4 HelperChildRel: Person 4"
5 = " 5 HelperChildRel: Person 5"
6 = " 6 HelperChildRel: Person 6"
7 = " 7 HelperChildRel: Person 7"
```

## SAS ALGORITHM FOR DEMENTIA

```
      8 = " 8 HelperChildRel: Person 8"  
      9 = " 9 HelperChildRel: Person 9"  
     10 = "10 HelperChildRel: Person 10"  
     11 = "11 HelperChildRel: Person 11"  
     12 = "12 HelperChildRel: Person 12"  
     13 = "13 HelperChildRel: Person 13"  
     14 = "14 HelperChildRel: Person 14"  
     15 = "15 HelperChildRel: Person 15"  
     16 = "16 HelperChildRel: Person 16"  
     17 = "17 HelperChildRel: Person 17"  
     18 = "18 HelperChildRel: Person 18"  
     19 = "19 HelperChildRel: Person 19"  
     20 = "20 HelperChildRel: Person 20"  
     21 = "21 HelperChildRel: Person 21"  
     22 = "22 HelperChildRel: Person 22"  
     23 = "23 HelperChildRel: Person 23"  
     24 = "24 HelperChildRel: Person 24" ;  
  
VALUE W000163W  
-7 = '-7 RF'  
-8 = '-8 DK'  
-1 = '-1 Inapplicable'  
-9 = '-9 Missing'  
 1 = " 1 CHILD/CHILDREN"  
 2 = " 2 GRANDCHILD/GRANDCHILDREN"  
 3 = " 3 SOMEONE ELSE" ;  
  
VALUE W000164W  
-7 = '-7 RF'  
-8 = '-8 DK'  
-1 = '-1 Inapplicable'  
-9 = '-9 Missing'  
 1 = " 1 NEARLY EVERY DAY"  
 2 = " 2 MORE THAN HALF THE DAYS"  
 3 = " 3 SEVERAL DAYS (LESS THAN HALF)"  
 4 = " 4 A FEW DAYS" ;  
  
VALUE W000165W  
-7 = '-7 RF'  
-8 = '-8 DK'  
-1 = '-1 Inapplicable'  
-9 = '-9 Missing'  
 1 = " 1 INCLUDED"  
 2 = " 2 EXTRA CHARGE" ;  
  
VALUE W000166W  
-7 = '-7 RF'  
-8 = '-8 DK'  
-1 = '-1 Inapplicable'  
-9 = '-9 Missing'  
 1 = " 1 YES, PHONE NUMBER PROVIDED"  
 2 = " 2 NO PHONE NUMBER AVAILABLE"  
 3 = " 3 REFUSED TO GIVE PHONE NUMBER" ;  
  
VALUE W000167W  
-7 = '-7 RF'  
-8 = '-8 DK'
```

## SAS ALGORITHM FOR DEMENTIA

```
-1 = '-1 Inapplicable'  
-9 = '-9 Missing'  
1 = " 1 HOME"  
2 = " 2 CELL PHONE"  
3 = " 3 WORK PHONE"  
91 = "91 SOMEWHERE ELSE (SPECIFY)" ;  
  
VALUE W000168W  
-7 = '-7 RF'  
-8 = '-8 DK'  
-1 = '-1 Inapplicable'  
-9 = '-9 Missing'  
1 = " 1 Yes" ;  
  
VALUE I000001W  
12 = "12 STARTED"  
20 = "20 COMPLETE"  
21 = "21 INELIGIBLE - NOT 65+" ;  
  
VALUE I000002W  
12 = "12 Started"  
20 = "20 Complete" ;  
  
VALUE I000003W  
-7 = '-7 RF'  
-8 = '-8 DK'  
-1 = '-1 Inapplicable'  
-9 = '-9 Missing'  
24 = "24 Notrequired" ;  
  
VALUE I000004W  
-7 = '-7 RF'  
-8 = '-8 DK'  
-1 = '-1 Inapplicable'  
-9 = '-9 Missing'  
1 = " 1 YES"  
2 = " 2 NO" ;  
  
VALUE I000005W  
-7 = '-7 RF'  
-8 = '-8 DK'  
-1 = '-1 Inapplicable'  
-9 = '-9 Missing'  
1 = " 1 IN PERSON"  
2 = " 2 TELEPHONE" ;  
  
VALUE I000006W  
-7 = '-7 RF'  
-8 = '-8 DK'  
-1 = '-1 Inapplicable'  
-9 = '-9 Missing'  
1 = " 1 Friendly and interested"  
2 = " 2 Cooperative but not particularly interested"  
3 = " 3 Impatient and restless"  
4 = " 4 Hostile" ;  
  
VALUE I000007W
```

## SAS ALGORITHM FOR DEMENTIA

```
-7 = '-7 RF'
-8 = '-8 DK'
-1 = '-1 Inapplicable'
-9 = '-9 Missing'
 1 = " 1 Good"
 2 = " 2 Fair"
 3 = " 3 Poor"      ;

VALUE I000008W
-7 = '-7 RF'
-8 = '-8 DK'
-1 = '-1 Inapplicable'
-9 = '-9 Missing'
 1 = " 1 All of the time"
 2 = " 2 Most of the time"
 3 = " 3 Some of the time"
 4 = " 4 Only for the cognition and/or performance parts"
 5 = " 5 None of the time"      ;

VALUE I000009W
-7 = '-7 RF'
-8 = '-8 DK'
-1 = '-1 Inapplicable'
-9 = '-9 Missing'
 1 = " 1 YES"
 2 = " 2 NO"
 3 = " 3 Interview was conducted by telephone"      ;

VALUE I000010W
-7 = '-7 RF'
-8 = '-8 DK'
-1 = '-1 Inapplicable'
-9 = '-9 Missing'
 1 = " 1 Spouse/Partner"
 2 = " 2 Child of SP"
 3 = " 3 Other relative"
 4 = " 4 Friend/Neighbor"
 5 = " 5 Staff person from place SP lives"
 6 = " 6 Personal helper/aide"
91 = "91 Other"      ;

VALUE I000011W
-7 = '-7 RF'
-8 = '-8 DK'
-1 = '-1 Inapplicable'
-9 = '-9 Missing'
 1 = " 1 Yes"
 2 = " 2 No"
 3 = " 3 Not Administered"      ;

VALUE I000012W
-7 = '-7 RF'
-8 = '-8 DK'
-1 = '-1 Inapplicable'
-9 = '-9 Missing'
 1 = " 1 SP/Proxy too tired to complete in 1 session"
 2 = " 2 SP/Proxy felt poorly/ill / SP's health"
```

## SAS ALGORITHM FOR DEMENTIA

```
3 = " 3 Schedule conflict for respondent"
91 = "91 Other(Specify)" ;

VALUE I000013W
-7 = '-7 RF'
-8 = '-8 DK'
-1 = '-1 Inapplicable'
-9 = '-9 Missing'
1 = " 1 Not at all cluttered"
2 = " 2 Somewhat cluttered"
3 = " 3 Very cluttered"
4 = " 4 Could not see other rooms" ;

VALUE I000014W
-7 = '-7 RF'
-8 = '-8 DK'
-1 = '-1 Inapplicable'
-9 = '-9 Missing'
1 = " 1 NONE"
2 = " 2 A LITTLE"
3 = " 3 SOME"
4 = " 4 A LOT" ;

VALUE I000015W
-7 = '-7 RF'
-8 = '-8 DK'
-1 = '-1 Inapplicable'
-9 = '-9 Missing'
1 = " 1 YES"
2 = " 2 NO"
7 = " 7 Could not observe" ;

VALUE I000016W
-7 = '-7 RF'
-8 = '-8 DK'
-1 = '-1 Inapplicable'
-9 = '-9 Missing'
1 = " 1 IN PERSON"
2 = " 2 BY PHONE" ;

VALUE F000001W
-7 = '-7 RF'
-8 = '-8 DK'
-1 = '-1 Inapplicable'
-9 = '-9 Missing'
1 = " 1 MALE"
2 = " 2 FEMALE" ;

VALUE F000002W
-7 = '-7 RF'
-8 = '-8 DK'
-1 = '-1 Inapplicable'
-9 = '-9 Missing'
1 = " 1 Yes" ;

VALUE F000003W
-7 = '-7 RF'
```

## SAS ALGORITHM FOR DEMENTIA

```
-8 = '-8 DK'
-1 = '-1 Inapplicable'
-9 = '-9 Missing'
1 = " 1 CONSENT TO RECORDING"
7 = " 7 REFUSE CONSENT TO RECORD" ;

VALUE F000004W
-7 = '-7 RF'
-8 = '-8 DK'
-1 = '-1 Inapplicable'
-9 = '-9 Missing'
1 = " 1 FREE STANDING NURSING HOME"
2 = " 2 FREE STANDING ASSISTED LIVING FACILITY"
3 = " 3 NURSING HOME AND ASSISTED LIVING FACILITY"
4 = " 4 CONTINUING CARE RETIREMENT COMMUNITY (CCRC)"
5 = " 5 ADULT FAMILY CARE HOME"
6 = " 6 GROUP HOME"
7 = " 7 BOARD AND CARE HOME"
8 = " 8 RETIREMENT COMMUNITY OR SENIOR HOUSING (NOT CCRC)"
91 = "91 OTHER (SPECIFY)" ;

VALUE F000005W
-7 = '-7 RF'
-8 = '-8 DK'
-1 = '-1 Inapplicable'
-9 = '-9 Missing'
1 = " 1 YES"
2 = " 2 NO" ;

VALUE F000006W
-7 = '-7 RF'
-8 = '-8 DK'
-1 = '-1 Inapplicable'
-9 = '-9 Missing'
1 = " 1 INDEPENDENT LIVING"
2 = " 2 ASSISTED LIVING"
3 = " 3 SPECIAL CARE, MEMORY CARE, OR ALZHEIMER'S UNIT"
4 = " 4 NURSING HOME"
91 = "91 OTHER (SPECIFY)" ;

VALUE F000007W
-7 = '-7 RF'
-8 = '-8 DK'
-1 = '-1 Inapplicable'
-9 = '-9 Missing'
1 = " 1 ASSISTED LIVING"
2 = " 2 NURSING HOME" ;

VALUE F000008W
-7 = '-7 RF'
-8 = '-8 DK'
-1 = '-1 Inapplicable'
-9 = '-9 Missing'
1 = " 1 ASSISTED LIVING"
2 = " 2 NURSING HOME"
3 = " 3 BOTH" ;
```



## SAS ALGORITHM FOR DEMENTIA

```
VALUE F000009W
  -7 = '-7 RF'
  -8 = '-8 DK'
  -1 = '-1 Inapplicable'
  -9 = '-9 Missing'
  1 = " 1 YES, SERVICE PROVIDED AS PART OF PACKAGE"
  2 = " 2 YES, SERVICE PROVIDED AT AN EXTRA CHARGE"
  3 = " 3 NO, SERVICE NOT PROVIDED"
;

VALUE F000010W
  -7 = '-7 RF'
  -8 = '-8 DK'
  -1 = '-1 Inapplicable'
  -9 = '-9 Missing'
  1 = " 1 SP/FAMILY"
  2 = " 2 SOCIAL SECURITY/SSI"
  3 = " 3 MEDICAID"
  4 = " 4 MEDICARE"
  5 = " 5 OTHER SOURCE"
;

VALUE F000011W
  -7 = '-7 RF'
  -8 = '-8 DK'
  -1 = '-1 Inapplicable'
  -9 = '-9 Missing'
  1 = " 1 INDEPENDENT LIVING"
  2 = " 2 ASSISTED LIVING"
  3 = " 3 SPECIAL CARE UNIT ASSISTED LIVING"
  4 = " 4 NURSING HOME"
  5 = " 5 SPECIAL CARE UNIT NURSING HOME"
  6 = " 6 OTHER (SPECIFY)" ;

VALUE F000012W
  12 = "12 STARTED"
  20 = "20 COMPLETED"
  24 = "24 NOT REQUIRED" ;

VALUE F000013W
  61 = "61 COMPLETE, NH FACILITY" ;

VALUE F000014W
  1 = "1 NURSING HOME"
  2 = "2 OTHER FACILITY" ;

*****;
VALUE BA1SS
  1 = '1 Eligible and recorded result for SxS Balance'
  2 = '2 Eligible and no recorded result for SxS Balance'
  4 = '4 Not Eligible due to exclusion criteria'
  -1 = '-1 Inapplicable'
  -9 = '-9 Missing';

VALUE BA1STAN
  1 = '1 Eligible and recorded result for Semi Tandem Balance'
  2 = '2 Eligible and no recorded result for Semi Tandem Balance'
```

## SAS ALGORITHM FOR DEMENTIA

```
3 = '3 Not administered because did not complete prior balance test'  
4 = '4 Not Eligible due to exclusion criteria'  
-1 = '-1 Inapplicable'  
-9 = '-9 Missing';
```

### VALUE BA1TAN

```
1 = '1 Eligible and recorded result for Full tandem Balance'  
2 = '2 Eligible and no recorded result for Full tandem Balance'  
3 = '3 Not administered because did not complete prior balance tests'  
4 = '4 Not Eligible due to exclusion criteria'  
-1 = '-1 Inapplicable'  
-9 = '-9 Missing';
```

### VALUE BA1OP

```
1 = '1 Eligible and recorded result for One leg eyes open Balance'  
2 = '2 Eligible and no recorded result for One leg eyes open Balance'  
3 = '3 Not administered because did not complete prior balance tests'  
4 = '4 Not Eligible due to exclusion criteria'  
-1 = '-1 Inapplicable'  
-9 = '-9 Missing';
```

### VALUE BA1CL

```
1 = '1 Eligible and recorded result for One leg eyes closed Balance'  
2 = '2 Eligible and no recorded result for One leg eyes closed Balance'  
3 = '3 Not administered because did not complete prior balance tests'  
4 = '4 Not Eligible due to exclusion criteria'  
-1 = '-1 Inapplicable'  
-9 = '-9 Missing';
```

### VALUE WA1WLK

```
1 = '1 Eligible and recorded result for walking course'  
2 = '2 Eligible and no recorded result for walking course'  
4 = '4 Not Eligible due to exclusion criteria'  
5 = '5 Not Eligible on exclusion criteria but recorded result (SP changed  
mind)'  
-1 = '-1 Inapplicable '  
-9 = '-9 Missing';
```

### VALUE CH1SCH

```
1 = '1 Eligible and recorded result for single chair stand'  
2 = '2 Eligible and no recorded result for single chair stand'  
4 = '4 Not Eligible due to exclusion criteria'  
-1 = '-1 Inapplicable'  
-9 = '-9 Missing';
```

### VALUE CH1RSH

```
1 = '1 Eligible and recorded result for repeated chair stand'  
2 = '2 Eligible and no recorded result for repeated chair stand'  
3 = '3 Not administered because did not complete single chair stand w/o  
arms'  
4 = '4 Not Eligible due to exclusion criteria'  
-1 = '-1 Inapplicable'  
-9 = '-9 Missing';
```

### VALUE GR1GRIP

```
1 = '1 Eligible and recorded result for grip strength'  
2 = '2 Eligible and no recorded result for grip strength'
```

## SAS ALGORITHM FOR DEMENTIA

```
4 = '4 Not Eligible due to exclusion criteria'  
-1 = '-1 Inapplicable'  
-9 = '-9 Missing';
```

### VALUE WC1WAIST

```
1 = '1 Eligible and recorded result for waist circumference'  
2 = '2 Eligible and no recorded result for waist circumference'  
-1 = '-1 Inapplicable'  
-9 = '-9 Missing';
```

### VALUE PK1PEAK

```
1 = '1 Eligible and recorded result for peak air flow'  
2 = '2 Eligible and no recorded result for peak air flow'  
-1 = '-1 Inapplicable'  
-9 = '-9 Missing';
```

### VALUE PA25FMT

```
-1 = '-1 Inapplicable'  
-9 = '-9 Missing'  
111= '111 Sleeping Napping'  
131= '131 Eating'  
132= '132 Going out to eat'  
199= '199 Other self care activities'  
211= '211 Work and work-related activities'  
221= '221 Other income generating activities'  
241= '241 Volunteering'  
299= '299 Other productive activities'  
321= '321 Shopping for non-durable goods'  
399= '399 Other shopping'  
411= '411 Food and drink preparation'  
434= '434 Outdoor Maintenance'  
439= '439 Household chores (can not tell if indoor/outdoor)'  
441= '441 Animal and pet care'  
442= '442 Walking and exercising pets'  
449= '449 Other animal and pet care'  
451= '451 Vehicle maintenance and repair'  
471= '471 Financial management'  
499= '499 Other household activities'  
511= '511 Physical care and assistance to others'  
599= '599 Other physical care'  
611= '611 Socializing with others in person'  
612= '612 Socializing with others on the phone'  
616= '616 Socializing and communicating on the computer'  
621= '621 Watching TV and movies'  
631= '631 Doing puzzles or games not on computer or online'  
632= '632 Gambling not online or at a casino'  
636= '636 Doing puzzles or games on a computer or online'  
641= '641 Arts and crafts or hobbies'  
642= '642 Reading'  
643= '643 Writing'  
644= '644 Listening to music'  
646= '646 Computer or online leisure activities'  
651= '651 Smoking or other tobacco use'  
652= '652 Drinking alcohol'  
661= '661 Doing nothing/relaxing'  
669= '669 No activity'
```

## SAS ALGORITHM FOR DEMENTIA

```
699= '699 Other non active leisure'  
711= '711 Playing sports'  
712= '712 Walking or jogging'  
713= '713 Other outdoor recreating activities'  
714= '714 Attending sporting events'  
718= '718 Watching sporting events'  
721= '721 Attending arts including plays and concerts'  
723= '723 Attending movies'  
724= '724 Attending casinos'  
737= '737 Travel for leisure'  
799= '799 Other active leisure'  
811= '811 Attending religious activities'  
812= '812 Other religious and spiritual activities'  
821= '821 Attending meetings or events'  
899= '899 Other organizational activity'  
991= '991 Other miscellaneous'  
992= '992 No favorite activity'  
997= '997 Refused'  
998= '998 Don't Know'  
999= '999 Not Codeable';
```

### VALUE \$PA25FM

```
'-1' = '-1 Inapplicable'  
'-9' = '-9 Missing'  
'111' = '111 Sleeping Napping'  
'131' = '131 Eating'  
'132' = '132 Going out to eat'  
'199' = '199 Other self care activities'  
'211' = '211 Work and work-related activities'  
'221' = '221 Other income generating activities'  
'241' = '241 Volunteering'  
'299' = '299 Other productive activities'  
'321' = '321 Shopping for non-durable goods'  
'399' = '399 Other shopping'  
'411' = '411 Food and drink preparation'  
'434' = '434 Outdoor Maintenance'  
'439' = '439 Household chores (can not tell if indoor/outdoor)'  
'441' = '441 Animal and pet care'  
'442' = '442 Walking and exercising pets'  
'449' = '449 Other animal and pet care'  
'451' = '451 Vehicle maintenance and repair'  
'471' = '471 Financial management'  
'499' = '499 Other household activities'  
'511' = '511 Physical care and assistance to others'  
'599' = '599 Other physical care'  
'611' = '611 Socializing with others in person'  
'612' = '612 Socializing with others on the phone'  
'616' = '616 Socializing and communicating on the computer'  
'621' = '621 Watching TV and movies'  
'631' = '631 Doing puzzles or games not on computer or online'  
'632' = '632 Gambling not online or at a casino'  
'636' = '636 Doing puzzles or games on a computer or online'  
'641' = '641 Arts and crafts or hobbies'  
'642' = '642 Reading'  
'643' = '643 Writing'  
'644' = '644 Listening to music'  
'646' = '646 Computer or online leisure activities'
```

## SAS ALGORITHM FOR DEMENTIA

```
'651' = '651 Smoking or other tobacco use'
'652' = '652 Drinking alcohol'
'661' = '661 Doing nothing/relaxing'
'669' = '669 No activity'
'699' = '699 Other non active leisure'
'711' = '711 Playing sports'
'712' = '712 Walking or jogging'
'713' = '713 Other outdoor recreating activities'
'714' = '714 Attending sporting events'
'718' = '718 Watching sporting events'
'721' = '721 Attending arts including plays and concerts'
'723' = '723 Attending movies'
'724' = '724 Attending casinos'
'737' = '737 Travel for leisure'
'799' = '799 Other active leisure'
'811' = '811 Attending religious activities'
'812' = '812 Other religious and spiritual activities'
'821' = '821 Attending meetings or events'
'899' = '899 Other organizational activity'
'991' = '991 Other miscellaneous'
'992' = '992 No favorite activity'
'997' = '997 Refused'
'998' = '998 Don't Know'
'999' = '999 Not Codeable';

/* ADD NEW FORMATS FOR THE PE DATA. */

VALUE PE_COMP
  1 = '1 Completed      '
  2 = '2 Attempted     '
  3 = '3 Not attempted'
 -1 = '-1 Inapplicable'
 -9 = '-9 Missing';

VALUE PE_YES
  1-HIGH = '1 Yes'
 -1 = '-1 Inapplicable'
 -9 = '-9 Missing';

VALUE WalkAid
  1 = '1 none'
  2 = '2 cane'
  3 = '3 walker or rollator'
  9 = '4 other'
 -1 = '-1 Inapplicable'
 -7 = '-7 RF'
 -8 = '-8 DK'
 -9 = '-9 Missing';

VALUE CH_ARMS
  1 = '1 with arms'
  2 = '2 without arms'
 -1 = '-1 Inapplicable'
 -9 = '-9 Missing';

VALUE RGT_LFT
```

## SAS ALGORITHM FOR DEMENTIA

```
1 = '1 Right'  
2 = '2 Left'  
-1 = '-1 Inapplicable'  
-9 = '-9 Missing';
```

```
VALUE PERSON  
1 = '1 Interviewer'  
2 = '2 Sample person'  
-1 = '-1 Inapplicable'  
-9 = '-9 Missing';
```

```
VALUE STAND  
1 = '1 Standing'  
2 = '2 Sitting'  
3 = '3 Lying down'  
-1 = '-1 Inapplicable'  
-9 = '-9 Missing';
```

```
VALUE EFFORT  
1 = '1 Full effort'  
2 = '2 Less effort for health reason'  
3 = '3 Less effort for other reason'  
-1 = '-1 Inapplicable'  
-9 = '-9 Missing';
```

```
VALUE A0001AB  
1 = "1 AM"  
2 = "2 PM"  
-1 = '-1 Inapplicable'  
-9 = '-9 Missing';
```

```
VALUE A0003BA  
1 = "1 Completed, held for 10 seconds"  
2 = "2 Attempted, not held for 10 seconds"  
3 = "3 Not attempted"  
-1 = '-1 Inapplicable'  
-9 = '-9 Missing';
```

```
VALUE A0019BA  
1 = "1 Completed, held for 30 seconds"  
2 = "2 Attempted, not held for 30 seconds"  
3 = "3 Not attempted"  
-1 = '-1 Inapplicable'  
-9 = '-9 Missing';
```

```
VALUE A0002WA  
1 = "1 Yes, there is space to set up the walking course"  
2 = "2 No, there is not space to set up the walking course"  
-1 = '-1 Inapplicable'  
-9 = '-9 Missing';
```

```
VALUE A0004WA  
1 = "1 None"  
2 = "2 Cane"  
3 = "3 Walker or rollator"  
9 = "9 Other, specify"  
-1 = '-1 Inapplicable'
```

## SAS ALGORITHM FOR DEMENTIA

```
-7 = '-7 RF'
-8 = '-8 DK'
-9 = '-9 Missing';

VALUE A0004CH
  1 = "1 No, chair stand not completed"
  2 = "2 Yes, chair stand completed"
-1 = '-1 Inapplicable'
-9 = '-9 Missing';

VALUE A0008CH
  1 = "1 With arms"
  2 = "2 Without arms"
-1 = '-1 Inapplicable'
-9 = '-9 Missing';

VALUE A0014CH
  1 = "1 1 Chair stand completed"
  2 = "2 2 Chair stands completed"
  3 = "3 3 Chair stands completed"
  4 = "4 4 Chair stands completed"
-1 = '-1 Inapplicable'
-9 = '-9 Missing';

VALUE OCCCODE
1 = '1 Management Occupations: 0010-0430'
2 = '2 Business and Financial Operations Occupations: 0500-0950'
3 = '3 Computer and mathematical occupations: 1000-1240'
4 = '4 Architecture and Engineering Occupations: 1300-1560'
5 = '5 Life, Physical, and Social Science Occupations: 1600-1965'
6 = '6 Community and Social Service Occupations: 2000-2060'
7 = '7 Legal Occupations: 2100-2160'
8 = '8 Education, Training, and Library Occupations: 2200-2550'
9 = '9 Arts, Design, Entertainment, Sports, and Media Occupations: 2600-2960'
10 = '10 Healthcare Practitioners and Technical Occupations: 3000-3540'
11 = '11 Healthcare Support Occupations: 3600-3655'
12 = '12 Protective Service Occupations: 3700-3955'
13 = '13 Food Preparation and Serving Related Occupations: 4000-4160'
14 = '14 Building and Grounds Cleaning and Maintenance Occupations: 4200-4250'
15 = '15 Personal Care and Service Occupations: 4300-4650'
16 = '16 Sales and Related Occupations: 4700-4965'
17 = '17 Office and Administrative Support Occupations: 5000-5940'
18 = '18 Farming, Fishing, and Forestry Occupations: 6000-6130'
19 = '19 Construction and Extraction Occupations: 6200-6940'
20 = '20 Installation, Maintenance, and Repair Occupations: 7000-7630'
21 = '21 Production Occupations: 7700-8965'
22 = '22 Transportation and Material Moving Occupations: 9000-9750'
23 = '23 Military Specific Occupations: 9800-9830'
24 = '24 NSOC: No current occ (Unemployed, no work in the last 5 years, never worked): 9920'
25 = '25 Blank field'
26 = '26 Code did not match'
94 = '94 Uncodable'
95 = '95 Never Worked Entire Life'
96 = '96 Homemaker/Raised Children'
```

## SAS ALGORITHM FOR DEMENTIA

```
-7 = '-7 RF'
-8 = '-8 DK'
-1 = '-1 Inapplicable'
-9 = '-9 Missing';

VALUE R1DSPPBM
-1="-1: Inapplicable"
1="1: PROXY INTERVIEW"
2="2: MISSING WALK AND REPEAT CHAIR AND BALANCE"
3="3: MISSING WALK AND REPEAT CHAIR"
4="4: MISSING WALK AND BALANCE"
5="5: MISSING REPEAT CHAIR AND BALANCE"
6="6: MISSING WALK"
7="7: MISSING REPEAT CHAIR"
8="8: MISSING BALANCE"
9="9: NO SPACE"
10="10: NO CHAIR"
11="11: NO SPACE WALK AND NO CHAIR"
12="12: NO SPACE WALK AND NON-SAFETY MISSING"
13="13: NO CHAIR AND NON-SAFETY MISSING"
14="14: NON-SAFETY WALK"
15="15: NON-SAFETY CHAIR"
16="16: NON-SAFETY BALANCE"
17="17: NON-SAFETY WALK AND CHAIR"
18="18: NON-SAFETY WALK AND BALANCE"
19="19: NON-SAFETY CHAIR AND BALANCE"
20="20: NON-SAFETY WALK AND CHAIR AND BALANCE"
;

VALUE dchntinhh
 1 = ' 1 Child identified in interview but not enumerated to OP File'
-1 = '-1 Inapplicable';

VALUE STAT1A
 0 = "0 No"
 1 = "1 Yes"
-1 = '-1 Inapplicable'
-9 = '-9 Missing';

VALUE $SPOUSEID
 '-1' = "-1 Inapplicable"
 '-9' = "-9 Missing";

RUN;

/*=====*/

/* NHATS_Round_2_Combined_PROC_FORMAT_Statement_v2.sas*/

PROC FORMAT ;

VALUE release
 1 = '1 Main Sample'
 2 = '2 Reserve Sample'
 9 = '9 New Release Sample';

VALUE STAT_DTa
```



## SAS ALGORITHM FOR DEMENTIA

```
4 = " 4 April"  
5 = " 5 May"  
6 = " 6 June"  
7 = " 7 July"  
8 = " 8 August"  
9 = " 9 September"  
10 = "10 October"  
11 = "11 November"  
99 = "99 Prior to start of field work"  
-1 = '-1 Inapplicable';
```

VALUE \$DISP

```
'10' = "10 Not Available "  
'11' = "11 Ready"  
'12' = "12 Started "  
'20' = "20 Final "  
'24' = "24 Not Required "  
'60' = "60 Complete "  
'61' = "61 Complete, NH facility"  
'62' = "62 Complete SP Deceased, Proxy Intv"  
'63' = "63 Complete SP, FQ not complete"  
'64' = "64 Complete FQ, SP not complete"  
'75' = "75 Physically/mentally unable to participate, no proxy"  
'76' = "76 Too ill to participate, no proxy"  
'77' = "77 Refusal, SP"  
'78' = "78 Language barrier"  
'79' = "79 Unable to locate"  
'80' = "80 Unavailable during field period"  
'82' = "82 Outside of PSU"  
'83' = "83 Ineligible"  
'85' = "85 Refusal, facility"  
'86' = "86 Deceased"  
'87' = "87 Refusal, proxy"  
'88' = "88 Work stopped" ;
```

VALUE DISP\_a

```
10 = "10 Not Available"  
11 = "11 Ready"  
12 = "12 Started"  
20 = "20 Final"  
24 = "24 Not Required"  
60 = "60 Complete"  
61 = "61 Complete, NH facility"  
62 = "62 Complete SP Deceased, Proxy Intv"  
63 = "63 Complete SP, FQ not complete"  
64 = "64 Complete FQ, SP not complete "  
75 = "75 Physically/mentally unable to participate, no proxy"  
76 = "76 Too ill to participate, no proxy"  
77 = "77 Refusal, SP"  
78 = "78 Language barrier"  
79 = "79 Unable to locate"  
80 = "80 Unavailable during field period"  
82 = "82 Outside of PSU"  
83 = "83 Ineligible"  
85 = "85 Refusal, facility"  
86 = "86 Deceased"  
87 = "87 Refusal, proxy"
```

## SAS ALGORITHM FOR DEMENTIA

```
      88 = "88 Work stopped"      ;

VALUE DISP_
  10 = "10 Not Available"
  11 = "11 Ready"
  12 = "12 Started"
  20 = "20 Final"
  24 = "24 Not Required";

VALUE DISP_F
  -1 = '-1 Inapplicable'
  10 = "10 Not Available"
  11 = "11 Ready"
  12 = "12 Started"
  20 = "20 Final"
  24 = "24 Not Required"
  60 = "60 Complete"
  61 = "61 Complete, NH facility"
  62 = "62 Complete SP Deceased, Proxy Intv"
  63 = "63 Complete SP, FQ not complete"
  64 = "64 Complete FQ, SP not complete "
  75 = "75 Physically/mentally unable to participate, no proxy"
  76 = "76 Too ill to participate, no proxy"
  77 = "77 Refusal, SP"
  78 = "78 Language barrier"
  79 = "79 Unable to locate"
  80 = "80 Unavailable during field period"
  82 = "82 Outside of PSU"
  83 = "83 Ineligible"
  85 = "85 Refusal, facility"
  86 = "86 Deceased"
  87 = "87 Refusal, proxy"
  88 = "88 Work stopped"
  89 = "89 Final, Other Specify";

VALUE RFDK
  -7 = '-7 RF'
  -8 = '-8 DK'
  -1 = '-1 Inapplicable (nursing home resident or residential care no FQ)'
  -9 = '-9 Missing';

VALUE $RFDK_F
  '-7' = '-7 RF'
  '-8' = '-8 DK'
  '-1' = '-1 Inapplicable'
  '-9' = '-9 Missing';

VALUE RFDK_F
  -7 = '-7 RF'
  -8 = '-8 DK'
  -1 = '-1 Inapplicable'
  -9 = '-9 Missing';

VALUE RFDK_B
  -1 = '-1 Inapplicable'
  1 = '1 Yes-Breakoff';
```

## SAS ALGORITHM FOR DEMENTIA

```
VALUE $RFDK_C
  '-1' = '-1 Inapplicable'
  'CL' = 'CL - Closing'
  'EW' = 'EW - Economic Well-Being'
  'FQ' = 'FQ - Facility Questionnaire'
  'HL' = 'HL - Helper'
  'HW' = 'HW - Height and Weight'
  'IP' = 'IP - Insurance Plans'
  'LF' = 'LF - Labor Force'
  'PA' = 'PA - Participation'
  'PE' = 'PE - Performance'
  'WB' = 'WB - Well-being' ;

VALUE $RFDK_2C
  '-1' = '-1 Inapplicable'
  '-7' = '-7 RF'
  '-8' = '-8 DK'
  '-9' = '-9 Missing';

VALUE RFDK_Y
  1 = ' 1 Yes'
  -7 = '-7 RF'
  -8 = '-8 DK'
  -1 = '-1 Inapplicable'
  -9 = '-9 Missing';

VALUE RFDK_YN
  1 = ' 1 Yes'
  2 = ' 2 No'
  -7 = '-7 RF'
  -8 = '-8 DK'
  -1 = '-1 Inapplicable'
  -9 = '-9 Missing';

VALUE DSTRP_G
  -7 = '-7 RF'
  -8 = '-8 DK'
  -1 = '-1 Inapplicable'
  -9 = '-9 Missing'
  1 = '1 X condition and word color condition accuracy below threshold
      (less than .42)'
  2 = '2 word condition only below threshold (less than .42)'
  3 = '3 X condition and word color condition meet criteria for accuracy'
  4 = '4 fewer than 50% of X and word color condition trials answered'
  999 = '999 X condition only below threshold (less than .42)';

VALUE DSTRP_R
  -7 = '-7 RF'
  -8 = '-8 DK'
  -1 = '-1 Inapplicable'
  -999 = '-999 Inapplicable'
  other = 'Values ranging between -.353 and 1.115';

VALUE DSTRP_M
  -7 = '-7 RF'
  -8 = '-8 DK'
  -1 = '-1 Inapplicable'
```

## SAS ALGORITHM FOR DEMENTIA

```
-999 = '-999 Inapplicable'  
other = 'Values ranging between -544.732 and 924.863';
```

### VALUE FQ\_4F

```
-7 = '-7 RF'  
-8 = '-8 DK'  
-1 = '-1 Inapplicable'  
-9 = '-9 Missing'  
    1='1 YES'  
    2='2 NO';
```

### VALUE CHILDDDEC

```
1 = '1 CHILD DECEASED'  
-7 = '-7 RF'  
-8 = '-8 DK'  
-1 = '-1 Inapplicable'  
-9 = '-9 Missing';
```

### VALUE W200001W

```
12 = "12 STARTED"  
20 = "20 COMPLETE"  
21 = "21 INELIGIBLE - NOT 65+" ;
```

### VALUE W200008x

```
-7 = '-7 RF'  
-8 = '-8 DK'  
-1 = '-1 Inapplicable'  
-9 = '-9 Missing'  
1 = "1 UNDER 20"  
2 = "2 20-24"  
3 = "3 25-29"  
4 = "4 30-34"  
5 = "5 35-39"  
6 = "6 40-44"  
7 = "7 45-49"  
8 = "8 50-54"  
9 = "9 55-59"  
10 = "10 60-64"  
11 = "11 65-69"  
12 = "12 70-74"  
13 = "13 75-79"  
14 = "14 80-84"  
15 = "15 85-89"  
16 = "16 90 +";
```

### VALUE W200009W

```
-7 = '-7 RF'  
-8 = '-8 DK'  
-1 = '-1 Inapplicable'  
-9 = '-9 Missing'  
1 = "1 SAMPLE PERSON"  
2 = "2 SPOUSE/ PARTNER"  
3 = "3 DAUGHTER"  
4 = "4 SON"  
5 = "5 DAUGHTER-IN-LAW"  
6 = "6 SON-IN-LAW"  
7 = "7 STEPDAUGHTER"
```

## SAS ALGORITHM FOR DEMENTIA

```
8 = "8 STEPSON"  
9 = "9 SISTER"  
10 = "10 BROTHER"  
11 = "11 SISTER-IN-LAW"  
12 = "12 BROTHER-IN-LAW"  
13 = "13 MOTHER"  
14 = "14 STEPMOTHER"  
15 = "15 MOTHER-IN-LAW"  
16 = "16 FATHER"  
17 = "17 STEPFATHER"  
18 = "18 FATHER-IN-LAW"  
19 = "19 GRANDDAUGHTER"  
20 = "20 GRANDSON"  
21 = "21 NIECE"  
22 = "22 NEPHEW"  
23 = "23 AUNT"  
24 = "24 UNCLE"  
25 = "25 COUSIN"  
26 = "26 STEPDAUGHTER'S SON/ DAUGHTER"  
27 = "27 STEPSON'S SON/ DAUGHTER"  
28 = "28 DAUGHTER-IN-LAW'S SON/ DAUGHTER"  
29 = "29 SON-IN-LAW'S SON/ DAUGHTER"  
30 = "30 BOARDER/RENTER"  
31 = "31 PAID AIDE/ HOUSEKEEPER/ EMPLOYEE"  
32 = "32 ROOMMATE"  
33 = "33 EX-WIFE/ EX-HUSBAND"  
34 = "34 BOYFRIEND/ GIRLFRIEND"  
35 = "35 NEIGHBOR"  
36 = "36 FRIEND"  
37 = "37 SOMEONE/SERVICE AT THE PLACE SP LIVES/LIVED"  
38 = "38 CO-WORKER"  
39 = "39 MINISTER, PRIEST, OR OTHER CLERGY"  
40 = "40 PSYCHIATRIST, PSYCHOLOGIST, COUNSELOR, OR THERAPIST"  
41 = "41 DECEASED SPOUSE/PARTNER"  
91 = "91 OTHER RELATIVE"  
92 = "92 OTHER NONRELATIVE" ;
```

```
VALUE W200002W
```

```
-7 = '-7 RF'  
-8 = '-8 DK'  
-1 = '-1 Inapplicable'  
-9 = '-9 Missing'  
1 = "1 MALE"  
2 = "2 FEMALE";
```

```
VALUE W200005W
```

```
-7 = '-7 RF'  
-8 = '-8 DK'  
-1 = '-1 Inapplicable'  
-9 = '-9 Missing'  
1 = "1 NO SCHOOLING COMPLETED"  
2 = "2 1ST-8TH GRADE"  
3 = "3 9TH-12TH GRADE (NO DIPLOMA)"  
4 = "4 HIGH SCHOOL GRADUATE (HIGH SCHOOL DIPLOMA OR EQUIVALENT)"  
5 = "5 VOCATIONAL, TECHNICAL, BUSINESS, OR TRADE SCHOOL CERTIFICATE OR  
DIPLOMA (BEYOND HIGH SCHOOL LEVEL)"  
6 = "6 SOME COLLEGE BUT NO DEGREE"
```

## SAS ALGORITHM FOR DEMENTIA

```
7 = "7 ASSOCIATE'S DEGREE"  
8 = "8 BACHELOR'S DEGREE"  
9 = "9 MASTER'S, PROFESSIONAL, OR DOCTORAL DEGREE" ;
```

```
VALUE W200010W  
-7 = '-7 RF'  
-8 = '-8 DK'  
-1 = '-1 Inapplicable'  
-9 = '-9 Missing'  
1 = "1 MARRIED"  
2 = "2 LIVING WITH A PARTNER"  
3 = "3 SEPARATED"  
4 = "4 DIVORCED"  
5 = "5 WIDOWED"  
6 = "6 NEVER MARRIED";
```

```
VALUE W200011W  
-7 = '-7 RF'  
-8 = '-8 DK'  
-1 = '-1 Inapplicable'  
-9 = '-9 Missing'  
1 = "1 YES"  
2 = "2 NO"  
7 = "7 PREVIOUSLY REPORTED" ;
```

```
VALUE W200012W  
-7 = '-7 RF'  
-8 = '-8 DK'  
-1 = '-1 Inapplicable'  
-9 = '-9 Missing'  
1 = "1 REGULAR"  
2 = "2 VARIED" ;
```

```
VALUE W200013W  
-7 = '-7 RF'  
-8 = '-8 DK'  
-1 = '-1 Inapplicable'  
-9 = '-9 Missing'  
1 = "1 SP AND/OR FAMILY"  
2 = "2 GOVERNMENT PROGRAM"  
3 = "3 INSURANCE"  
91 = "91 OTHER (SPECIFY)" ;
```

```
VALUE W200015W  
-7 = '-7 RF'  
-8 = '-8 DK'  
-1 = '-1 Inapplicable'  
-9 = '-9 Missing'  
1='1 HOURLY'  
2='2 WEEKLY'  
3='3 MONTHLY'  
4='4 DID NOT PAY IN LAST MONTH';
```

```
VALUE W200016W  
-7 = '-7 RF'  
-8 = '-8 DK'  
-1 = '-1 Inapplicable'  
-9 = '-9 Missing'
```

## SAS ALGORITHM FOR DEMENTIA

```
1 = "1 MEDICAID"  
2 = "2 MEDICARE"  
3 = "3 STATE PROGRAM"  
91 = "91 OTHER (SPECIFY)" ;
```

```
VALUE W200018W  
-7 = '-7 RF'  
-8 = '-8 DK'  
-1 = '-1 Inapplicable'  
-9 = '-9 Missing'  
1 = "1 FREE-STANDING (DETACHED) SINGLE HOUSE"  
2 = "2 SINGLE HOUSE BUT ATTACHED TO OTHERS (ROW HOUSE, TOWNHOUSE, DUPLEX,  
TRIPLEX, OR TRIPLE DECKER)"  
3 = "3 MOBILE HOME OR TRAILER"  
4 = "4 MULTI-UNIT (2+) BUILDING"  
91 = "91 OTHER (SPECIFY)" ;
```

```
VALUE W200020W  
-7 = '-7 RF'  
-8 = '-8 DK'  
-1 = '-1 Inapplicable'  
-9 = '-9 Missing'  
1 = "1 HOME"  
2 = "2 MULTI-UNIT"  
3 = "3 OTHER" ;
```

```
VALUE W200021W  
-7 = '-7 RF'  
-8 = '-8 DK'  
-1 = '-1 Inapplicable'  
-9 = '-9 Missing'  
1 = "1 BUILDING HAS ONE FLOOR"  
2 = "2 BUILDING HAS MULTIPLE FLOORS" ;
```

```
VALUE W200022W  
-7 = '-7 RF'  
-8 = '-8 DK'  
-1 = '-1 Inapplicable'  
-9 = '-9 Missing'  
1 = "1 HOME"  
2 = "2 APARTMENT"  
3 = "3 ROOM"  
4 = "4 UNIT"  
5 = "5 SUITE"  
6 = "6 SOMETHING ELSE (SPECIFY)" ;
```

```
VALUE W200030W  
-7 = '-7 RF'  
-8 = '-8 DK'  
-1 = '-1 Inapplicable'  
-9 = '-9 Missing'  
1 = "1 SAMPLE PERSON (SP)"  
2 = "2 PROXY" ;
```

```
VALUE W200032W  
-7 = '-7 RF'  
-8 = '-8 DK'
```

## SAS ALGORITHM FOR DEMENTIA

```
-1 = '-1 Inapplicable'  
-9 = '-9 Missing'  
1 = "1 HOSPITAL"  
2 = "2 NURSING HOME/REHAB CENTER"  
91 = "91 OTHER (SPECIFY)" ;
```

VALUE W200035W

```
-1 = '-1 Inapplicable'  
-9 = '-9 Missing'  
1 = "1 SELF"  
2 = "2 SPOUSE/ PARTNER"  
3 = "3 DAUGHTER"  
4 = "4 SON"  
5 = "5 DAUGHTER-IN-LAW"  
6 = "6 SON-IN-LAW"  
7 = "7 STEPDAUGHTER"  
8 = "8 STEPSON"  
9 = "9 SISTER"  
10 = "10 BROTHER"  
11 = "11 SISTER-IN-LAW"  
12 = "12 BROTHER-IN-LAW"  
13 = "13 MOTHER"  
14 = "14 STEPMOTHER"  
15 = "15 MOTHER-IN-LAW"  
16 = "16 FATHER"  
17 = "17 STEPFATHER"  
18 = "18 FATHER-IN-LAW"  
19 = "19 GRANDDAUGHTER"  
20 = "20 GRANDSON"  
21 = "21 NIECE"  
22 = "22 NEPHEW"  
23 = "23 AUNT"  
24 = "24 UNCLE"  
25 = "25 COUSIN"  
26 = "26 STEPDAUGHTER'S SON/ DAUGHTER"  
27 = "27 STEPSON'S SON/ DAUGHTER"  
28 = "28 DAUGHTER-IN-LAW'S SON/ DAUGHTER"  
29 = "29 SON-IN-LAW'S SON/ DAUGHTER"  
30 = "30 BOARDER/RENTER"  
31 = "31 PAID AIDE/ HOUSEKEEPER/ EMPLOYEE"  
32 = "32 ROOMMATE"  
33 = "33 EX-WIFE/ EX-HUSBAND"  
34 = "34 BOYFRIEND/ GIRLFRIEND"  
35 = "35 NEIGHBOR"  
36 = "36 FRIEND"  
37 = "37 SOMEONE/SERVICE FROM THE PLACE SP LIVES/DIED"  
38 = "38 CO-WORKER"  
39 = "39 MINISTER, PRIEST, OR OTHER CLERGY"  
40 = "40 PSYCHIATRIST, PSYCHOLOGIST, COUNSELOR, OR THERAPIST"  
91 = "91 OTHER RELATIVE"  
92 = "92 OTHER NONRELATIVE" ;
```

VALUE W200036W

```
-7 = '-7 RF'  
-8 = '-8 DK'  
-1 = '-1 Inapplicable'  
-9 = '-9 Missing'
```



## SAS ALGORITHM FOR DEMENTIA

```
1 = "1 VERY FAMILIAR"  
2 = "2 SOMEWHAT FAMILIAR"  
3 = "3 A LITTLE FAMILIAR"  
4 = "4 NOT AT ALL FAMILIAR" ;
```

```
VALUE W200037W  
-7 = '-7 RF'  
-8 = '-8 DK'  
-1 = '-1 Inapplicable'  
-9 = '-9 Missing'  
1 = "1 YES, SAME ADDRESS"  
2 = "2 NO, DIFFERENT ADDRESS"  
3 = "3 YES, SAME ADDRESS WITH MINOR CORRECTIONS" ;
```

```
VALUE W200038W  
-7 = '-7 RF'  
-8 = '-8 DK'  
-1 = '-1 Inapplicable'  
-9 = '-9 Missing'  
1 = "1 JANUARY"  
2 = "2 FEBRUARY"  
3 = "3 MARCH"  
4 = "4 APRIL"  
5 = "5 MAY"  
6 = "6 JUNE"  
7 = "7 JULY"  
8 = "8 AUGUST"  
9 = "9 SEPTEMBER"  
10 = "10 OCTOBER"  
11 = "11 NOVEMBER"  
12 = "12 DECEMBER" ;
```

```
VALUE W200039W  
-7 = '-7 RF'  
-8 = '-8 DK'  
-1 = '-1 Inapplicable'  
-9 = '-9 Missing'  
1 = "1 2011"  
2 = "2 2012"  
3 = "3 YEAR2013"  
4 = "4 YEAR2014"  
5 = "5 YEAR2015"  
6 = "6 YEAR2016"  
7 = "7 YEAR2017"  
8 = "8 YEAR2018"  
9 = "9 YEAR2019"  
10 = "10 YEAR2020" ;
```

```
VALUE W200040W  
-7 = '-7 RF'  
-8 = '-8 DK'  
-1 = '-1 Inapplicable'  
-9 = '-9 Missing'  
1 = "1 2011"  
2 = "2 2012" ;
```

```
VALUE W200041W
```

## SAS ALGORITHM FOR DEMENTIA

```
-7 = '-7 RF'  
-8 = '-8 DK'  
-1 = '-1 Inapplicable'  
-9 = '-9 Missing'  
1 = "1 AT SPS OR SOMEONE ELSE'S HOME"  
2 = "2 IN A HOSPITAL"  
3 = "3 IN A NURSING HOME"  
4 = "4 IN A HOSPICE RESIDENCE"  
5 = "5 IN TRANSIT (AMBULANCE TO HOSPITAL)"  
91 = "91 SOMEWHERE ELSE (SPECIFY)";
```

VALUE W200042W

```
-7 = '-7 RF'  
-8 = '-8 DK'  
-1 = '-1 Inapplicable'  
-9 = '-9 Missing'  
1 = "1 SP'S HOME"  
2 = "2 SOMEONE ELSE'S HOME" ;
```

VALUE W200043W

```
-7 = '-7 RF'  
-8 = '-8 DK'  
-1 = '-1 Inapplicable'  
-9 = '-9 Missing'  
1 = "1 INTENSIVE CARE UNIT"  
2 = "2 PALLIATIVE CARE UNIT"  
3 = "3 INPATIENT HOSPICE UNIT"  
4 = "4 EMERGENCY ROOM"  
5 = "5 ANOTHER KIND OF UNIT" ;
```

VALUE W200044W

```
-7 = '-7 RF'  
-8 = '-8 DK'  
-1 = '-1 Inapplicable'  
-9 = '-9 Missing'  
1 = "1 HOSPICE AT A HOSPITAL"  
2 = "2 HOSPICE AT A NURSING HOME"  
3 = "3 RESIDENTIAL HOSPICE"  
4 = "4 OTHER HOSPICE" ;
```

VALUE W200045W

```
-7 = '-7 RF'  
-8 = '-8 DK'  
-1 = '-1 Inapplicable'  
-9 = '-9 Missing'  
1 = "1 DAYS"  
2 = "2 WEEKS"  
3 = "3 MONTHS"  
4 = "4 YEARS" ;
```

VALUE W200046W

```
-7 = '-7 RF'  
-8 = '-8 DK'  
-1 = '-1 Inapplicable'  
-9 = '-9 Missing'  
1 = "1 AT SP'S HOME"  
2 = "2 IN A HOSPITAL"
```

## SAS ALGORITHM FOR DEMENTIA

```
3 = "3 IN A NURSING HOME"  
4 = "4 IN A HOSPICE RESIDENCE"  
91 = "91 SOMEWHERE ELSE (SPECIFY)" ;  
  
VALUE W200047W  
-7 = '-7 RF'  
-8 = '-8 DK'  
-1 = '-1 Inapplicable'  
-9 = '-9 Missing'  
1 = "1 EVERY DAY"  
2 = "2 MOST DAYS"  
3 = "3 SOME DAYS"  
4 = "4 RARELY"  
5 = "5 NOT AT ALL" ;  
  
VALUE W200048W  
-7 = '-7 RF'  
-8 = '-8 DK'  
-1 = '-1 Inapplicable'  
-9 = '-9 Missing'  
1 = "1 LESS THAN WAS NEEDED"  
2 = "2 MORE THAN WAS NEEDED"  
3 = "3 ABOUT RIGHT AMOUNT" ;  
  
VALUE W200049W  
-7 = '-7 RF'  
-8 = '-8 DK'  
-1 = '-1 Inapplicable'  
-9 = '-9 Missing'  
1 = "1 YES"  
2 = "2 NO"  
3 = "3 DOES NOT APPLY/NO CARE IN LAST MONTH OF LIFE" ;  
  
VALUE W200050W  
-7 = '-7 RF'  
-8 = '-8 DK'  
-1 = '-1 Inapplicable'  
-9 = '-9 Missing'  
1 = "1 ALWAYS"  
2 = "2 USUALLY"  
3 = "3 SOMETIMES"  
4 = "4 NEVER"  
5 = "5 DOES NOT APPLY/NO CARE IN LAST MONTH OF LIFE" ;  
  
VALUE W200051W  
-7 = '-7 RF'  
-8 = '-8 DK'  
-1 = '-1 Inapplicable'  
-9 = '-9 Missing'  
1 = "1 EXCELLENT"  
2 = "2 VERY GOOD"  
3 = "3 GOOD"  
4 = "4 FAIR"  
5 = "5 POOR" ;  
  
VALUE W200052W  
-7 = '-7 RF'
```

## SAS ALGORITHM FOR DEMENTIA

```
-8 = '-8 DK'  
-1 = '-1 Inapplicable'  
-9 = '-9 Missing'  
1 = "1 NOT AT ALL"  
2 = "2 SEVERAL DAYS"  
3 = "3 MORE THAN HALF THE DAYS"  
4 = "4 NEARLY EVERY DAY" ;
```

VALUE W200053W

```
-7 = '-7 RF'  
-8 = '-8 DK'  
-1 = '-1 Inapplicable'  
-9 = '-9 Missing'  
1 = "1 EVERY NIGHT (7 NIGHTS A WEEK)"  
2 = "2 MOST NIGHTS (5-6 NIGHTS A WEEK)"  
3 = "3 SOME NIGHTS (2-4 NIGHTS A WEEK)"  
4 = "4 RARELY (ONCE A WEEK OR LESS)"  
5 = "5 NEVER" ;
```

VALUE W200054W

```
-7 = '-7 RF'  
-8 = '-8 DK'  
-1 = '-1 Inapplicable'  
-9 = '-9 Missing'  
1 = "1 EVERY NIGHT (7 NIGHTS A WEEK)"  
2 = "2 MOST NIGHTS (5-6 NIGHTS A WEEK)"  
3 = "3 SOME NIGHTS (2-4 NIGHTS A WEEK)"  
4 = "4 RARELY (ONCE A WEEK OR LESS)"  
5 = "5 NEVER"  
7 = "7 DON'T WAKE UP/NOT A PROBLEM" ;
```

VALUE W200055W

```
-7 = '-7 RF'  
-8 = '-8 DK'  
-1 = '-1 Inapplicable'  
-9 = '-9 Missing'  
1 = "1 PRIVATE RESIDENCE"  
2 = "2 A GROUP HOME, BOARD AND CARE, OR SUPERVISED HOUSING"  
3 = "3 ASSISTED LIVING FACILITY OR CONTINUING CARE RETIREMENT COMMUNITY  
(CCRC)"  
4 = "4 RELIGIOUS GROUP QUARTERS"  
91 = "91 OTHER (SPECIFY)" ;
```

VALUE W200056W

```
-7 = '-7 RF'  
-8 = '-8 DK'  
-1 = '-1 Inapplicable'  
-9 = '-9 Missing'  
1 = "1 YES"  
2 = "2 NO"  
7 = "7 PLACE DOES NOT HAVE A NAME" ;
```

VALUE W200057W

```
-7 = '-7 RF'  
-8 = '-8 DK'  
-1 = '-1 Inapplicable'  
-9 = '-9 Missing'
```

## SAS ALGORITHM FOR DEMENTIA

```
1 = "1 APARTMENT"  
2 = "2 ROOM"  
3 = "3 UNIT"  
4 = "4 SUITE"  
91 = "91 SOMETHING ELSE (SPECIFY)" ;
```

```
VALUE W200058W
```

```
-7 = '-7 RF'  
-8 = '-8 DK'  
-1 = '-1 Inapplicable'  
-9 = '-9 Missing'  
1 = "1 YES"  
2 = "2 NO, DIFFERENT PERSON"  
3 = "3 NO, NAME MISPELLED" ;
```

```
VALUE W200060W
```

```
-7 = '-7 RF'  
-8 = '-8 DK'  
-1 = '-1 Inapplicable'  
-9 = '-9 Missing'  
1 = "1 PRIVATE RESIDENCE"  
2 = "2 A GROUP HOME, BOARD AND CARE, OR SUPERVISED HOUSING"  
3 = "3 ASSISTED LIVING FACILITY OR CONTINUING CARE RETIREMENT COMMUNITY  
(CCRC)"  
5 = "5 NURSING HOME"  
91 = "91 OTHER (SPECIFY)" ;
```

```
VALUE W200061W
```

```
-7 = '-7 RF'  
-8 = '-8 DK'  
-1 = '-1 Inapplicable'  
-9 = '-9 Missing'  
1 = "1 SEPARATION OR DIVORCE"  
2 = "2 DECEASED"  
3 = "3 MOVED ELSEWHERE"  
5 = "5 LAST INTERVIEW INFORMATION INCORRECT"  
8 = "8 OTHER REASON" ;
```

```
VALUE W200067W
```

```
-7 = '-7 RF'  
-8 = '-8 DK'  
-1 = '-1 Inapplicable'  
-9 = '-9 Missing'  
1 = "1 COMMON OR SHARED ENTRANCE"  
2 = "2 ENTRANCE DIRECTLY INTO HOME" ;
```

```
VALUE W200068W
```

```
-7 = '-7 RF'  
-8 = '-8 DK'  
-1 = '-1 Inapplicable'  
-9 = '-9 Missing'  
1 = "1"  
2 = "2"  
3 = "3"  
4 = "4+" ;
```

```
VALUE W200069W
```

## SAS ALGORITHM FOR DEMENTIA

```
-7 = '-7 RF'  
-8 = '-8 DK'  
-1 = '-1 Inapplicable'  
-9 = '-9 Missing'  
1 = "1 ALL ITEMS HERE"  
2 = "2 ADDED ONE OR MORE ITEMS" ;
```

```
VALUE W200070W
```

```
-7 = '-7 RF'  
-8 = '-8 DK'  
-1 = '-1 Inapplicable'  
-9 = '-9 Missing'  
1 = "1 MORE THAN $500"  
2 = "2 LESS THAN $500"  
3 = "3 JUST ABOUT $500" ;
```

```
VALUE W200071W
```

```
-7 = '-7 RF'  
-8 = '-8 DK'  
-1 = '-1 Inapplicable'  
-9 = '-9 Missing'  
1 = "1 MORE THAN $1,000"  
2 = "2 LESS THAN $1,000"  
3 = "3 JUST ABOUT $1,000" ;
```

```
VALUE W200072W
```

```
-7 = '-7 RF'  
-8 = '-8 DK'  
-1 = '-1 Inapplicable'  
-9 = '-9 Missing'  
1 = "1 MORE THAN $100"  
2 = "2 LESS THAN $100"  
3 = "3 JUST ABOUT $100" ;
```

```
VALUE W200073W
```

```
-7 = '-7 RF'  
-8 = '-8 DK'  
-1 = '-1 Inapplicable'  
-9 = '-9 Missing'  
1 = "1 YES"  
2 = "2 NO"  
7 = "7 YES, DOESNT KNOW HOW TO USE A COMPUTER" ;
```

```
VALUE W200074W
```

```
-7 = '-7 RF'  
-8 = '-8 DK'  
-1 = '-1 Inapplicable'  
-9 = '-9 Missing'  
1 = "1 MOST DAYS"  
2 = "2 SOME DAYS"  
3 = "3 RARELY" ;
```

```
VALUE W200076W
```

```
-7 = '-7 RF'  
-8 = '-8 DK'  
-1 = '-1 Inapplicable'  
-9 = '-9 Missing'
```

## SAS ALGORITHM FOR DEMENTIA

```
1 = "1 YES"
2 = "2 NO"
7 = "7 DEAF" ;

VALUE W200077W
-7 = '-7 RF'
-8 = '-8 DK'
-1 = '-1 Inapplicable'
-9 = '-9 Missing'
1 = "1 YES"
2 = "2 NO"
7 = "7 BLIND" ;

VALUE W200078W
-7 = '-7 RF'
-8 = '-8 DK'
-1 = '-1 Inapplicable'
-9 = '-9 Missing'
1 = "1 EVERY DAY (7 DAYS A WEEK)"
2 = "2 MOST DAYS (5-6 DAYS A WEEK)"
3 = "3 SOME DAYS (2-4 DAYS A WEEK)"
4 = "4 RARELY (ONCE A WEEK OR LESS)"
5 = "5 NEVER" ;

VALUE W200080W
-7 = '-7 RF'
-8 = '-8 DK'
-1 = '-1 Inapplicable'
-9 = '-9 Missing'
1 = "1 YES, A CHANGE"
2 = "2 NO, NO CHANGE"
3 = "3 DEMENTIA/ALZHEIMER'S REPORTED BY PROXY" ;

VALUE W200081W
-7 = '-7 RF'
-8 = '-8 DK'
-1 = '-1 Inapplicable'
-9 = '-9 Missing'
1 = "1 SP HAS DEMENTIA/ALZHEIMER'S/ NOT ABLE"
2 = "2 SP IS UNABLE TO SPEAK"
3 = "3 SP IS UNABLE TO HEAR"
4 = "4 SP REFUSED"
5 = "5 PROXY REFUSED"
6 = "6 SP NOT PRESENT"
7 = "7 SP TOO ILL"
8 = "8 SP LANGUAGE BARRIER"
91 = "91 OTHER (SPECIFY)" ;

VALUE W200082W
-7 = '-7 RF'
-8 = '-8 DK'
-1 = '-1 Inapplicable'
-9 = '-9 Missing'
1 = "1 MUCH BETTER"
2 = "2 BETTER"
3 = "3 SAME"
4 = "4 WORSE"
```

## SAS ALGORITHM FOR DEMENTIA

```
5 = "5 MUCH WORSE" ;

VALUE W200083W
-7 = '-7 RF'
-8 = '-8 DK'
-1 = '-1 Inapplicable'
-9 = '-9 Missing'
1 = "1 YES"
2 = "2 NO/DON'T KNOW" ;

VALUE W200084W
-7 = '-7 RF'
-8 = '-8 DK'
-1 = '-1 Inapplicable'
-9 = '-9 Missing'
1 = "1 CONTINUE WITH ACTIVITY"
2 = "2 SP REFUSES ACTIVITY" ;

VALUE W200085W
-1 = '-1 Inapplicable'
-9 = '-9 Missing'
1 = "Word[1]"
2 = "Word[2]"
3 = "Word[3]"
4 = "Word[4]"
5 = "Word[5]"
6 = "Word[6]"
7 = "Word[7]"
8 = "Word[8]"
9 = "Word[9]"
10 = "Word[10]"
91 = "91 NO WORDS REMEMBERED"
92 = "92 REFUSED" ;

VALUE W200086W
-7 = '-7 RF'
-8 = '-8 DK'
-1 = '-1 Inapplicable'
-9 = '-9 Missing'
1 = "1 DIFFICULTY HEARING ANY OF THE WORDS"
2 = "2 INTERRUPTION OCCURRED WHILE LIST WAS BEING READ"
91 = "91 OTHER PROBLEM (SPECIFY)"
92 = "92 NO PROBLEMS OCCURRED"
97 = "97 SP REFUSED WORD RECALL TASK" ;

VALUE W200087W
-1 = '-1 Inapplicable'
-9 = '-9 Missing'
1 = "1 SP ATTEMPTED CLOCK DRAWING"
2 = "2 SP DID NOT ATTEMPT CLOCK DRAWING"
97 = "3 SP REFUSED CLOCK DRAWING" ;

VALUE W200089W
-7 = '-7 RF'
-8 = '-8 DK'
-1 = '-1 Inapplicable'
-9 = '-9 Missing'
```



## SAS ALGORITHM FOR DEMENTIA

```
1 = "1 EVERY DAY (7 DAYS A WEEK)"
2 = "2 MOST DAYS (5-6 DAYS A WEEK)"
3 = "3 SOME DAYS (2-4 DAYS A WEEK)"
4 = "4 RARELY (ONCE A WEEK OR LESS)"
5 = "5 NEVER" ;

VALUE W200090W
-7 = '-7 RF'
-8 = '-8 DK'
-1 = '-1 Inapplicable'
-9 = '-9 Missing'
1 = "1 EVERY TIME"
2 = "2 MOST TIMES"
3 = "3 SOMETIMES"
4 = "4 RARELY"
5 = "5 NEVER" ;

VALUE W200092W
-7 = '-7 RF'
-8 = '-8 DK'
-1 = '-1 Inapplicable'
-9 = '-9 Missing'
1 = "1 MOST TIMES"
2 = "2 SOMETIMES"
3 = "3 RARELY"
4 = "4 NEVER" ;

VALUE W200093W
-7 = '-7 RF'
-8 = '-8 DK'
-1 = '-1 Inapplicable'
-9 = '-9 Missing'
1 = "1 NONE"
2 = "2 A LITTLE"
3 = "3 SOME"
4 = "4 A LOT" ;

VALUE W200094W
-7 = '-7 RF'
-8 = '-8 DK'
-1 = '-1 Inapplicable'
-9 = '-9 Missing'
1 = "1 MORE OFTEN"
2 = "2 LESS OFTEN"
3 = "3 ABOUT THE SAME" ;

VALUE W200095W
-7 = '-7 RF'
-8 = '-8 DK'
-1 = '-1 Inapplicable'
-9 = '-9 Missing'
1 = "1 JANUARY"
2 = "2 FEBRUARY"
3 = "3 MARCH"
4 = "4 APRIL"
5 = "5 MAY"
6 = "6 JUNE"
```

## SAS ALGORITHM FOR DEMENTIA

```
7 = "7 JULY"  
8 = "8 AUGUST"  
9 = "9 SEPTEMBER"  
10 = "10 OCTOBER"  
11 = "11 NOVEMBER"  
12 = "12 DECEMBER"  
90 = "90 LAST INTERVIEW INFORMATION INCORRECT" ;  
  
VALUE W200096W  
-7 = '-7 RF'  
-8 = '-8 DK'  
-1 = '-1 Inapplicable'  
-9 = '-9 Missing'  
1 = "1 YES"  
2 = "2 NO"  
90 = "90 LAST INTERVIEW INFORMATION INCORRECT" ;  
  
VALUE W200097W  
-7 = '-7 RF'  
-8 = '-8 DK'  
-1 = '-1 Inapplicable'  
-9 = '-9 Missing'  
1 = "1 YES"  
2 = "2 NO / NO LONGER DRIVE" ;  
  
VALUE W200098W  
-7 = '-7 RF'  
-8 = '-8 DK'  
-1 = '-1 Inapplicable'  
-9 = '-9 Missing'  
1 = "1 YES"  
2 = "2 NO"  
7 = "7 NO, NO RAIN OR BAD WEATHER" ;  
  
VALUE W200099W  
-7 = '-7 RF'  
-8 = '-8 DK'  
-1 = '-1 Inapplicable'  
-9 = '-9 Missing'  
1 = "1 ALWAYS DID IT BY SELF"  
2 = "2 ALWAYS DID IT TOGETHER WITH SOMEONE ELSE"  
3 = "3 SOMEONE ELSE ALWAYS DID IT"  
4 = "4 IT VARIED (MORE THAN ONE WAY)"  
5 = "5 NOT DONE IN LAST MONTH" ;  
  
VALUE W200102W  
-7 = '-7 RF'  
-8 = '-8 DK'  
-1 = '-1 Inapplicable'  
-9 = '-9 Missing'  
1 = "1 MORE OFTEN"  
2 = "2 LESS OFTEN"  
3 = "3 SAME" ;  
  
VALUE W200106W  
-7 = '-7 RF'  
-8 = '-8 DK'
```

## SAS ALGORITHM FOR DEMENTIA

```
-1 = '-1 Inapplicable'  
-9 = '-9 Missing'  
1 = "1 YES"  
2 = "2 NO"  
7 = "7 ALWAYS FED THROUGH IV OR TUBE" ;
```

VALUE W200107W

```
-7 = '-7 RF'  
-8 = '-8 DK'  
-1 = '-1 Inapplicable'  
-9 = '-9 Missing'  
1 = "1 EVERY TIME"  
2 = "2 MOST TIMES"  
3 = "3 SOMETIMES"  
4 = "4 RARELY" ;
```

VALUE W200109W

```
-7 = '-7 RF'  
-8 = '-8 DK'  
-1 = '-1 Inapplicable'  
-9 = '-9 Missing'  
1 = "1 SHOWERING"  
2 = "2 TAKING BATHS"  
3 = "3 WASHING UP SOME OTHER WAY" ;
```

VALUE W200114W

```
-7 = '-7 RF'  
-8 = '-8 DK'  
-1 = '-1 Inapplicable'  
-9 = '-9 Missing'  
1 = "1 VERY IMPORTANT"  
2 = "2 SOMEWHAT IMPORTANT"  
3 = "3 NOT SO IMPORTANT" ;
```

VALUE W200115W

```
-7 = '-7 RF'  
-8 = '-8 DK'  
-1 = '-1 Inapplicable'  
-9 = '-9 Missing'  
1 = "1 YES"  
2 = "2 NO"  
95 = "95 NO ACTIVITY LISTED" ;
```

VALUE W200116W

```
-7 = '-7 RF'  
-8 = '-8 DK'  
-1 = '-1 Inapplicable'  
-9 = '-9 Missing'  
1 = "1 LEFT"  
2 = "2 RIGHT"  
3 = "3 BOTH" ;
```

VALUE W200117W

```
-7 = '-7 RF'  
-8 = '-8 DK'  
-1 = '-1 Inapplicable'
```

## SAS ALGORITHM FOR DEMENTIA

```
-9 = '-9 Missing'  
1 = "1 LEFT SIDE"  
2 = "2 RIGHT SIDE"  
3 = "3 BOTH SIDES" ;
```

```
VALUE W200118W  
-7 = '-7 RF'  
-8 = '-8 DK'  
-1 = '-1 Inapplicable'  
-9 = '-9 Missing'  
1 = "1 ONE SIDE"  
2 = "2 BOTH SIDES" ;
```

```
VALUE W200119W  
-7 = '-7 RF'  
-8 = '-8 DK'  
-1 = '-1 Inapplicable'  
-9 = '-9 Missing'  
1 = "1 RECEIVE ALL TREATMENTS"  
2 = "2 STOP/REJECT ALL TREATMENTS" ;
```

```
VALUE W200120W  
-7 = '-7 RF'  
-8 = '-8 DK'  
-1 = '-1 Inapplicable'  
-9 = '-9 Missing'  
1 = "1 LIVING IN THEIR OWN HOME WITH HELP FROM FRIENDS AND FAMILY"  
2 = "2 LIVING IN THEIR OWN HOME WITH HELP FROM SOMEONE PAID TO COME IN"  
3 = "3 LIVING WITH AN ADULT CHILD"  
4 = "4 LIVING IN AN ASSISTED LIVING FACILITY OR CONTINUING CARE  
RESIDENCE"  
5 = "5 LIVING IN A NURSING HOME" ;
```

```
VALUE W200121W  
-7 = '-7 RF'  
-8 = '-8 DK'  
-1 = '-1 Inapplicable'  
-9 = '-9 Missing'  
1 = "1 YES"  
2 = "2 NO"  
3 = "3 DOESNT HAVE ANY MONEY TO PAY A CAREGIVER"  
4 = "4 WOULD NOT USE A PAID CAREGIVER" ;
```

```
VALUE W200122W  
-7 = '-7 RF'  
-8 = '-8 DK'  
-1 = '-1 Inapplicable'  
-9 = '-9 Missing'  
1 = "1 MAKE DECISIONS WITHOUT MUCH ADVICE FROM THEM"  
2 = "2 GET THEIR ADVICE AND THEN MAKE DECISIONS"  
3 = "3 MAKE DECISIONS TOGETHER"  
4 = "4 LEAVE DECISIONS UP TO THEM" ;
```

```
VALUE W200123W  
-7 = '-7 RF'  
-8 = '-8 DK'  
-1 = '-1 Inapplicable'
```

## SAS ALGORITHM FOR DEMENTIA

```
-9 = '-9 Missing'  
1 = "1 HANDLE MOSTLY BY SELF"  
2 = "2 HANDLE TOGETHER WITH FAMILY OR CLOSE FRIENDS"  
3 = "3 FAMILY OR CLOSE FRIENDS MOSTLY HANDLE THESE THINGS"  
4 = "4 IT VARIES" ;
```

VALUE W200124W

```
-7 = '-7 RF'  
-8 = '-8 DK'  
-1 = '-1 Inapplicable'  
-9 = '-9 Missing'  
1 = "1 NEVER"  
2 = "2 RARELY"  
3 = "3 SOMETIMES"  
4 = "4 OFTEN" ;
```

VALUE W200126W

```
-7 = '-7 RF'  
-8 = '-8 DK'  
-1 = '-1 Inapplicable'  
-9 = '-9 Missing'  
1 = "1 AGREE A LOT"  
2 = "2 AGREE A LITTLE"  
3 = "3 DO NOT AGREE" ;
```

VALUE W200127W

```
-7 = '-7 RF'  
-8 = '-8 DK'  
-1 = '-1 Inapplicable'  
-9 = '-9 Missing'  
1 = "1 AGREE A LOT"  
2 = "2 AGREE A LITTLE"  
3 = "3 AGREE NOT AT ALL" ;
```

VALUE W200129W

```
-7 = '-7 RF'  
-8 = '-8 DK'  
-1 = '-1 Inapplicable'  
-9 = '-9 Missing'  
1 = "1 less than $1,000,"  
2 = "2 $1,000 to less than $2,000,"  
3 = "3 $2,000 to less than $3,000,"  
4 = "4 $3,000 to less than $5,000, or"  
5 = "5 $5,000 or more?" ;
```

VALUE W200131W

```
-7 = '-7 RF'  
-8 = '-8 DK'  
-1 = '-1 Inapplicable'  
-9 = '-9 Missing'  
1 = "1 YES"  
2 = "2 NO"  
3 = "3 RETIRED/DON'T WORK ANYMORE" ;
```

VALUE W200132W

```
-7 = '-7 RF'  
-8 = '-8 DK'
```

## SAS ALGORITHM FOR DEMENTIA

```
-1 = '-1 Inapplicable'  
-9 = '-9 Missing'  
1 = "1 EVERY WEEK"  
2 = "2 EVERY TWO WEEKS"  
3 = "3 TWO TIMES A MONTH"  
4 = "4 ONCE A MONTH"  
5 = "5 DAILY"  
91 = "91 OTHER SCHEDULE (SPECIFY)" ;
```

```
VALUE W200133W
```

```
-7 = '-7 RF'  
-8 = '-8 DK'  
-1 = '-1 Inapplicable'  
-9 = '-9 Missing'  
1 = "1 OWN"  
2 = "2 RENT"  
3 = "3 SOME OTHER ARRANGEMENT" ;
```

```
VALUE W200134W
```

```
-7 = '-7 RF'  
-8 = '-8 DK'  
-1 = '-1 Inapplicable'  
-9 = '-9 Missing'  
1 = "1 PAID OFF"  
2 = "2 STILL MAKE PAYMENTS"  
3 = "3 REVERSE MORTGAGE" ;
```

```
VALUE W200135W
```

```
-7 = '-7 RF'  
-8 = '-8 DK'  
-1 = '-1 Inapplicable'  
-9 = '-9 Missing'  
1 = "1 less than $250,"  
2 = "2 $250-$499,"  
3 = "3 $500-$999, or"  
4 = "4 $1,000 or more?" ;
```

```
VALUE W200136W
```

```
-7 = '-7 RF'  
-8 = '-8 DK'  
-1 = '-1 Inapplicable'  
-9 = '-9 Missing'  
1 = "1 5 YEARS"  
2 = "2 10 YEARS"  
3 = "3 LONGER THAN 10 YEARS" ;
```

```
VALUE W200137W
```

```
-7 = '-7 RF'  
-8 = '-8 DK'  
-1 = '-1 Inapplicable'  
-9 = '-9 Missing'  
1 = "1 less than $50,000,"  
2 = "2 between $50,000 and $100,000, or"  
3 = "3 over $100,000?" ;
```

```
VALUE W200138W
```

```
-7 = '-7 RF'
```

## SAS ALGORITHM FOR DEMENTIA

```
-8 = '-8 DK'  
-1 = '-1 Inapplicable'  
-9 = '-9 Missing'  
1 = "1 less than $50,000,"  
2 = "2 $50,000-$74,999,"  
3 = "3 $75,000-$99,999,"  
4 = "4 $100,000-$199,999,"  
5 = "5 $200,000-$299,999,"  
6 = "6 $300,000-$499,999,"  
7 = "7 $500,000-$749,999, or"  
8 = "8 $750,000 or more?" ;
```

VALUE W200139W

```
-7 = '-7 RF'  
-8 = '-8 DK'  
-1 = '-1 Inapplicable'  
-9 = '-9 Missing'  
1 = "1 PAY OFF BALANCE"  
2 = "2 PAY MINIMUM"  
3 = "3 PAY MORE THAN MINIMUM, BUT NOT ENTIRE BALANCE"  
4 = "4 DON'T HAVE ANY CREDIT CARDS" ;
```

VALUE W200140W

```
-7 = '-7 RF'  
-8 = '-8 DK'  
-1 = '-1 Inapplicable'  
-9 = '-9 Missing'  
1 = "1 less than $1,000,"  
2 = "2 $1,000 - $1,999,"  
3 = "3 $2,000 - $3,999,"  
4 = "4 $4,000 - $5,999,"  
5 = "5 $6,000 - $9,999,"  
6 = "6 $10,000 - $19,999, or"  
7 = "7 $20,000 or more?" ;
```

VALUE W200141W

```
-7 = '-7 RF'  
-8 = '-8 DK'  
-1 = '-1 Inapplicable'  
-9 = '-9 Missing'  
1 = "1 MOST"  
2 = "2 SOME"  
3 = "3 A LITTLE" ;
```

VALUE W200142W

```
-7 = '-7 RF'  
-8 = '-8 DK'  
-1 = '-1 Inapplicable'  
-9 = '-9 Missing'  
1 = "1 less than $500,"  
2 = "2 $500 - $999,"  
3 = "3 $1,000 - $1,999,"  
4 = "4 $2,000 - $3,999,"  
5 = "5 $4,000 - $5,999,"  
6 = "6 $6,000 - $9,999,"  
7 = "7 $10,000 - $19,999, or"  
8 = "8 $20,000 or more?" ;
```

## SAS ALGORITHM FOR DEMENTIA

```
VALUE W200146W
-7 = '-7 RF'
-8 = '-8 DK'
-1 = '-1 Inapplicable'
-9 = '-9 Missing'
1 = "1 NEARLY EVERY DAY"
2 = "2 MORE THAN HALF THE DAYS"
3 = "3 SEVERAL DAYS (LESS THAN HALF)"
4 = "4 A FEW DAYS" ;
```

```
VALUE W200147W
-7 = '-7 RF'
-8 = '-8 DK'
-1 = '-1 Inapplicable'
-9 = '-9 Missing'
1 = "1 INCLUDED"
2 = "2 EXTRA CHARGE" ;
```

```
VALUE W200148W
-7 = '-7 RF'
-8 = '-8 DK'
-1 = '-1 Inapplicable'
-9 = '-9 Missing'
1 = "1 Yes" ;
```

```
VALUE F200006W
-7 = '-7 RF'
-8 = '-8 DK'
-1 = '-1 Inapplicable'
-9 = '-9 Missing'
1 = "1 FREE STANDING NURSING HOME"
2 = "2 FREE STANDING ASSISTED LIVING FACILITY"
3 = "3 NURSING HOME AND ASSISTED LIVING FACILITY"
4 = "4 CONTINUING CARE RETIREMENT COMMUNITY (CCRC)"
5 = "5 ADULT FAMILY CARE HOME"
6 = "6 GROUP HOME"
7 = "7 BOARD AND CARE HOME"
8 = "8 RETIREMENT COMMUNITY OR SENIOR HOUSING (NOT CCRC)"
91 = "91 OTHER (SPECIFY)" ;
```

```
VALUE F200007W
-7 = '-7 RF'
-8 = '-8 DK'
-1 = '-1 Inapplicable'
-9 = '-9 Missing'
1 = "1 YES"
2 = "2 NO" ;
```

```
VALUE F200008W
-7 = '-7 RF'
-8 = '-8 DK'
-1 = '-1 Inapplicable'
-9 = '-9 Missing'
1 = "1 INDEPENDENT LIVING"
2 = "2 ASSISTED LIVING"
3 = "3 SPECIAL CARE, MEMORY CARE, OR ALZHEIMER'S UNIT"
```



## SAS ALGORITHM FOR DEMENTIA

```
4 = "4 NURSING HOME"  
91 = "91 OTHER (SPECIFY)" ;
```

```
VALUE F200009W
```

```
-7 = '-7 RF'  
-8 = '-8 DK'  
-1 = '-1 Inapplicable'  
-9 = '-9 Missing'  
1 = "1 ASSISTED LIVING"  
2 = "2 NURSING HOME" ;
```

```
VALUE F200011W
```

```
-7 = '-7 RF'  
-8 = '-8 DK'  
-1 = '-1 Inapplicable'  
-9 = '-9 Missing'  
1 = "1 YES, SERVICE PROVIDED AS PART OF PACKAGE"  
2 = "2 YES, SERVICE PROVIDED AT AN EXTRA CHARGE"  
3 = "3 NO, SERVICE NOT PROVIDED" ;
```

```
VALUE F200012W
```

```
-7 = '-7 RF'  
-8 = '-8 DK'  
-1 = '-1 Inapplicable'  
-9 = '-9 Missing'  
1 = "1 SP/FAMILY"  
2 = "2 SOCIAL SECURITY/SSI"  
3 = "3 MEDICAID"  
4 = "4 MEDICARE"  
5 = "5 OTHER SOURCE" ;
```

```
VALUE I200002W
```

```
-7 = '-7 RF'  
-8 = '-8 DK'  
-1 = '-1 Inapplicable'  
-9 = '-9 Missing'  
1 = "1 Yes"  
2 = "2 No" ;
```

```
VALUE I200003W
```

```
-7 = '-7 RF'  
-8 = '-8 DK'  
-1 = '-1 Inapplicable'  
-9 = '-9 Missing'  
1 = "1 English"  
2 = "2 Spanish"  
3 = "3 Other (specify)" ;
```

```
VALUE I200005W
```

```
-7 = '-7 RF'  
-8 = '-8 DK'  
-1 = '-1 Inapplicable'  
-9 = '-9 Missing'  
1 = "1 Friendly and interested"  
2 = "2 Cooperative but not particularly interested"  
3 = "3 Impatient and restless"  
4 = "4 Hostile" ;
```

## SAS ALGORITHM FOR DEMENTIA

VALUE I200006W

-7 = '-7 RF'  
-8 = '-8 DK'  
-1 = '-1 Inapplicable'  
-9 = '-9 Missing'  
1 = "1 Good"  
2 = "2 Fair"  
3 = "3 Poor" ;

VALUE I200008W

-7 = '-7 RF'  
-8 = '-8 DK'  
-1 = '-1 Inapplicable'  
-9 = '-9 Missing'  
1 = "1 All of the time"  
2 = "2 Most of the time"  
3 = "3 Some of the time"  
4 = "4 Only for the cognition and/or performance parts"  
5 = "5 None of the time" ;

VALUE I200010W

-7 = '-7 RF'  
-8 = '-8 DK'  
-1 = '-1 Inapplicable'  
-9 = '-9 Missing'  
1 = "1 Yes"  
2 = "2 No"  
3 = "3 Interview was conducted by telephone" ;

VALUE I200012W

-7 = '-7 RF'  
-8 = '-8 DK'  
-1 = '-1 Inapplicable'  
-9 = '-9 Missing'  
1 = "1 Yes"  
2 = "2 No"  
3 = "3 Not Administered" ;

VALUE I200013W

-7 = '-7 RF'  
-8 = '-8 DK'  
-1 = '-1 Inapplicable'  
-9 = '-9 Missing'  
1 = "1 Yes"  
2 = "2 No" ;

VALUE I200016W

-7 = '-7 RF'  
-8 = '-8 DK'  
-1 = '-1 Inapplicable'  
-9 = '-9 Missing'  
1 = "1 Yes"  
2 = "2 No"  
3 = "3 Entire interview conducted by telephone" ;

VALUE I200017W

## SAS ALGORITHM FOR DEMENTIA

```
-7 = '-7 RF'  
-8 = '-8 DK'  
-1 = '-1 Inapplicable'  
-9 = '-9 Missing'  
1 = "1 Not at all cluttered"  
2 = "2 Somewhat cluttered"  
3 = "3 Very cluttered"  
4 = "4 Could not see other rooms" ;
```

```
VALUE I200018W
```

```
-7 = '-7 RF'  
-8 = '-8 DK'  
-1 = '-1 Inapplicable'  
-9 = '-9 Missing'  
1 = "1 None"  
2 = "2 A little"  
3 = "3 Some"  
4 = "4 A lot"  
5 = "5 Could not observe" ;
```

```
VALUE I200019W
```

```
-7 = '-7 RF'  
-8 = '-8 DK'  
-1 = '-1 Inapplicable'  
-9 = '-9 Missing'  
1 = "1 Yes"  
2 = "2 No"  
7 = "7 Could not observe" ;
```

```
/* DERIVED VARIABLE FORMATS */
```

```
VALUE LVGARRG
```

```
1 = '1 Alone'  
2 = '2 With spouse/partner only (spouse/partner in household)'  
3 = '3 With spouse/partner and with others'  
4 = '4 With others only'  
-1 = '-1 Inapplicable'  
-9 = '-9 Missing';
```

```
VALUE DOUTSFDF
```

```
8 = '8 Not done in last month'  
1 = '1 Did not do by self in last month'  
2 = '2 Did by self in last month/No Difficulty'  
3 = '3 Did by self in last month/Difficulty'  
4 = '4 DKRF Did by self in last month/No Difficulty'  
5 = '5 DKRF Did by self in last month/Difficulty'  
6 = '6 Did by self in last month/DKRF Difficulty'  
7 = '7 DKRF Did by self in last month/DKRF Difficulty'  
-1 = '-1 Inapplicable'  
-9 = '-9 Missing';
```

```
VALUE DOUTDEVI
```

```
8 = '8 Not done in last month'  
1 = '1 No use of devices to go outside in last month'  
2 = '2 Use of devices to go outside in last month'  
3 = '3 DKRF If used devices to go outside in last month'  
4 = '4 DKRF If used devices in last month'
```

## SAS ALGORITHM FOR DEMENTIA

```
-1 = '-1 Inapplicable'  
-9 = '-9 Missing';
```

### VALUE DOUTHELP

```
8 = '8 Not done in last month'  
1 = '1 NO HELP TO GO OUTSIDE IN LAST MONTH'  
2 = '2 HAD HELP TO GO OUTSIDE IN LAST MONTH'  
3 = '3 DKRF IF HAD HELP TO GO OUTSIDE IN LAST MONTH'  
-1 = '-1 Inapplicable'  
-9 = '-9 Missing';
```

### VALUE DINSDSFD

```
8 = '8 Not done in last month'  
1 = '1 Did not do by self in last month'  
2 = '2 Did by self in last month/No Difficulty'  
3 = '3 Did by self in last month/Difficulty'  
4 = '4 DKRF Did by self in last month/No Difficulty'  
5 = '5 DKRF Did by self in last month/Difficulty'  
6 = '6 Did by self in last month/DKRF Difficulty'  
7 = '7 DKRF Did by self in last month/DKRF Difficulty'  
-1 = '-1 Inapplicable'  
-9 = '-9 Missing';
```

### VALUE DINSDDDEV

```
8 = '8 Not done in last month'  
1 = '1 No use of devices inside in last month'  
2 = '2 Use of devices inside in last month'  
3 = '3 DKRF If used devices inside in last month'  
4 = '4 DKRF On Use of devices'  
-1 = '-1 Inapplicable'  
-9 = '-9 Missing';
```

### VALUE dinsdhlp

```
8 = '8 Not done in last month'  
1 = '1 No help to go around inside in last month'  
2 = '2 Had help to go around inside in last month'  
3 = '3 DKRF If had help to go around inside in last month'  
-1 = '-1 Inapplicable'  
-9 = '-9 Missing';
```

### VALUE dbedsfd

```
1 = '1 Did not do by self in last month'  
2 = '2 Did by self in last month/No Difficulty'  
3 = '3 Did by self in last month/Difficulty'  
4 = '4 DKRF Did by self in last month/No Difficulty'  
5 = '5 DKRF Did by self in last month/Difficulty'  
6 = '6 Did by self in last month/DKRF Difficulty'  
7 = '7 DKRF Did by self in last month/DKRF Difficulty'  
-1 = '-1 Inapplicable'  
-9 = '-9 Missing';
```

### VALUE dbeddevi

```
1 = '1 No use of cane or walker to get out of bed in last month'  
2 = '2 Use of cane or walker to get out of bed in last month'  
3 = '3 DKRF If Used cane or walker to get out of bed in last month'  
4 = '4 DKRF If used cane or walker in last month'  
-1 = '-1 Inapplicable'
```

## SAS ALGORITHM FOR DEMENTIA

```
-9 = '-9 Missing';
```

### VALUE dbedhelp

```
1 = '1 No help to get out of bed in last month'  
2 = '2 Had help to get out of bed in last month'  
3 = '3 DKRF If had help to get out of bed in last month'  
-1 = '-1 Inapplicable'  
-9 = '-9 Missing';
```

### VALUE dlaunbfd

```
1 = '1 Did not do by self in last month'  
2 = '2 Did by self in last month/No Difficulty'  
3 = '3 Did by self in last month/Difficulty'  
4 = '4 DKRF Did by self in last month/No Difficulty'  
5 = '5 DKRF Did by self in last month/Difficulty'  
6 = '6 Did by self in last month/DKRF Difficulty'  
7 = '7 DKRF Did by self in last month/DKRF Difficulty'  
8 = '8 Not done in last month'  
-1 = '-1 Inapplicable'  
-9 = '-9 Missing';
```

### VALUE dlaunrea

```
1= '1 Health/functioning reason only'  
2= '2 Other reason only'  
3= '3 Both health/functioning and other'  
4= '4 Service/someone from the place SP lives'  
-7 = '-7 RF'  
-8 = '-8 DK'  
-1 = '-1 Inapplicable'  
-9 = '-9 Missing';
```

### VALUE dshopsfd

```
1 = '1 Did not do by self in last month'  
2 = '2 Did by self in last month/No Difficulty'  
3 = '3 Did by self in last month/Difficulty'  
4 = '4 DKRF Did by self in last month/No Difficulty'  
5 = '5 DKRF Did by self in last month/Difficulty'  
6 = '6 Did by self in last month/DKRF Difficulty'  
7 = '7 DKRF Did by self in last month/DKRF Difficulty'  
8 = '8 Not done in last month'  
-1 = '-1 Inapplicable'  
-9 = '-9 Missing';
```

### VALUE dshoprea

```
1= '1 Health/functioning reason only'  
2= '2 Other reason only'  
3= '3 Both health/functioning and other'  
4= '4 Service/someone from the place SP lives'  
-7 = '-7 RF'  
-8 = '-8 DK'  
-1 = '-1 Inapplicable'  
-9 = '-9 Missing';
```

### VALUE dmealsfd

## SAS ALGORITHM FOR DEMENTIA

```
1 = '1 Did not do by self in last month'  
2 = '2 Did by self in last month/No Difficulty'  
3 = '3 Did by self in last month/Difficulty'  
4 = '4 DKRF Did by self in last month/No Difficulty'  
5 = '5 DKRF Did by self in last month/Difficulty'  
6 = '6 Did by self in last month/DKRF Difficulty'  
7 = '7 DKRF Did by self in last month/DKRF Difficulty'  
8 = '8 Not done in last month'  
-1 = '-1 Inapplicable'  
-9 = '-9 Missing';
```

### VALUE dmealrea

```
1= '1 Health/functioning reason only'  
2= '2 Other reason only'  
3= '3 Both health/functioning and other'  
4= '4 Service/someone from the place SP lives'  
-7 = '-7 RF'  
-8 = '-8 DK'  
-1 = '-1 Inapplicable'  
-9 = '-9 Missing';
```

### VALUE dbanksfd

```
1 = '1 Did not do by self in last month'  
2 = '2 Did by self in last month/No Difficulty'  
3 = '3 Did by self in last month/Difficulty'  
4 = '4 DKRF Did by self in last month/No Difficulty'  
5 = '5 DKRF Did by self in last month/Difficulty'  
6 = '6 Did by self in last month/DKRF Difficulty'  
7 = '7 DKRF Did by self in last month/DKRF Difficulty'  
8 = '8 Not done in last month'  
-7 = '-7 RF'  
-8 = '-8 DK'  
-1 = '-1 Inapplicable'  
-9 = '-9 Missing';
```

### VALUE dbankrea

```
1= '1 Health/functioning reason only'  
2= '2 Other reason only'  
3= '3 Both health/functioning and other'  
4= '4 Service/someone from the place SP lives'  
-7 = '-7 RF'  
-8 = '-8 DK'  
-1 = '-1 Inapplicable'  
-9 = '-9 Missing';
```

### VALUE deatdevi

```
1 = '1 No use of adapted utensils in last month'  
2 = '2 Use of adapted utensils in last month'  
8 = '8 Not done in last month'  
3 = '3 DKRF If used adapted utensils in last month'  
-1 = '-1 Inapplicable'  
-9 = '-9 Missing';
```

### VALUE deathelp

```
1 = '1 No help eating in last month'  
2 = '2 Had help eating in last month'  
3 = '3 DKRF If had help eating in last month'
```

## SAS ALGORITHM FOR DEMENTIA

```
8 = '8 Not done in last month'  
-1 = '-1 Inapplicable'  
-9 = '-9 Missing';
```

### VALUE deatsfdf

```
1 = '1 Did not do by self in last month'  
2 = '2 No Difficulty by self (and when using utensils)'  
3 = '3 Difficulty by self (and when using utensils)'  
6 = '6 Did by self in last month/DKRF Difficulty'  
7 = '7 DKRF Did by self in last month/DKRF Difficulty'  
8 = '8 Not done in last month'  
-1 = '-1 Inapplicable'  
-9 = '-9 Missing';
```

### VALUE dbathdev

```
1 = '1 No use of grab bars or bath seats in last month'  
2 = '2 Use of grab bars or bath seats in last month'  
3 = '3 DKRF If use of grab bars or bath seats in last month'  
4 = '4 DKRF If had grab bars or bath seats in last month'  
9 = '9 No bars/seats/shower/tub or washes up other way'  
-1 = '-1 Inapplicable'  
-9 = '-9 Missing';
```

### VALUE dbathhel

```
1 = '1 No help bathing in last month'  
2 = '2 Had help bathing in last month'  
3 = '3 DKRF If had help bathing in last month'  
-1 = '-1 Inapplicable'  
-9 = '-9 Missing';
```

### VALUE dbathsfd

```
1 = '1 Did not do by self in last month'  
2 = '2 No Difficulty by self (and when using grab bars or tub seat)'  
3 = '3 Difficulty by self (and when using grab bars or tub seat)'  
6 = '6 Did by self in last month/DKRF Difficulty'  
7 = '7 DKRF Did by self in last month/DKRF Difficulty'  
-1 = '-1 Inapplicable'  
-9 = '-9 Missing';
```

### VALUE dtoildev

```
1 = '1 No use of toileting devices in last month'  
2 = '2 Use of toileting devices in last month'  
3 = '3 DKRF of some and no use of other toileting devices in last month'  
-1 = '-1 Inapplicable'  
-9 = '-9 Missing';
```

### VALUE dtoilhel

```
1 = '1 No help toileting in last month'  
2 = '2 Had help toileting in last month'  
3 = '3 DKRF If had help toileting in last month'  
-1 = '-1 Inapplicable'  
-9 = '-9 Missing';
```

### VALUE dtoilsfd

```
1 = '1 Did not do by self in last month'  
2 = '2 No Difficulty by self (and when using toileting devices)'  
3 = '3 Difficulty by self (and when using toileting devices)'
```

## SAS ALGORITHM FOR DEMENTIA

```
6 = '6 Did by self in last month/DKRF Difficulty'  
7 = '7 DKRF Did by self in last month/DKRF Difficulty'  
-1 = '-1 Inapplicable'  
-9 = '-9 Missing';
```

```
VALUE ddresdev  
8 = '8 Not done in last month'  
9 = '9 DKRF If dressed in last month'  
2 = '2 Use of dressing devices in last month'  
1 = '1 No Use of dressing devices in last month'  
3 = '3 DKRF If use of dressing devices in last month'  
-1 = '-1 Inapplicable'  
-9 = '-9 Missing';
```

```
VALUE ddreshel  
8 = '8 Not done in last month'  
9 = '9 DKRF If dressed in last month'  
1 = '1 No help dressing in last month'  
2 = '2 Had help dressing in last month'  
3 = '3 DKRF if had help dressing in last month'  
-1 = '-1 Inapplicable'  
-9 = '-9 Missing';
```

```
VALUE ddressfd  
1 = '1 Did not do by self in last month'  
2 = '2 No Difficulty by self (and when using dressing devices)'  
3 = '3 Difficulty by self (and when using dressing devices)'  
6 = '6 Did by self in last month/DKRF Difficulty'  
7 = '7 DKRF Did by self in last month/DKRF Difficulty'  
8 = '8 Not done in last month'  
-1 = '-1 Inapplicable'  
-9 = '-9 Missing';
```

```
VALUE dmedssfd  
1 = '1 Did not do by self in last month'  
2 = '2 Did by self in last month/No Difficulty'  
3 = '3 Did by self in last month/Difficulty'  
4 = '4 DKRF Did by self in last month/No Difficulty'  
5 = '5 DKRF Did by self in last month/Difficulty'  
6 = '6 Did by self in last month/DKRF Difficulty'  
7 = '7 DKRF Did by self in last month/DKRF Difficulty'  
8 = '8 Not done in last month'  
9 = '9 No or DKRF if medications taken in last month'  
-1 = '-1 Inapplicable'  
-9 = '-9 Missing';
```

```
VALUE dmedsrea  
1 = '1 HEALTH/FUNCTIONING REASON ONLY'  
2 = '2 OTHER REASON ONLY'  
3 = '3 BOTH HEALTH/FUNCTIONING AND OTHER'  
4 = '4 SERVICE/SOMEONE FROM THE PLACE SP LIVES'  
-7 = '-7 RF'  
-8 = '-8 DK'  
-1 = '-1 Inapplicable'  
-9 = '-9 Missing';
```

```
VALUE dmarstat  
1 = '1 Married'
```



## SAS ALGORITHM FOR DEMENTIA

```
2 = '2 Living with a partner'
3 = '3 Separated'
4 = '4 Divorced'
5 = '5 Widowed'
6 = '6 Never married'
-7 = '-7 RF'
-8 = '-8 DK'
-1 = '-1 Inapplicable'
-9 = '-9 Missing';

VALUE DSPSAGEC
-7 = '-7 RF'
-8 = '-8 DK'
-1 = '-1 Inapplicable'
-9 = '-9 Missing'
1 = " 1 UNDER 50"
2 = " 2 50-54"
3 = " 3 55-59"
4 = " 4 60-64"
5 = " 5 65-69"
6 = " 6 70-74"
7 = " 7 75-79"
8 = " 8 80-84"
9 = " 9 85-89"
10 = "10 90 +" ;

VALUE f_dresid
1 = '1 Community '
2 = '2 Residential care not nursing home (SP interview)'
3 = '3 Residential care not nursing home (FQ only)'
4 = '4 Nursing home (SP interview)'
5 = '5 Nursing home (FQ only)'
6 = '6 Deceased'
7 = '7 Residential care not nursing home in R1 and R2 (FQ only)'
8 = '8 Nursing home in R1 and R2 (FQ only)' ;

VALUE QUARTILE
-9="-9 Missing"
-1="-1 Inapplicable";

VALUE SPPB
-9="-9 Missing"
-1="-1 Inapplicable";

VALUE SPPB_MIS
-9="-9 Missing"
-1="-1 Inapplicable"
1="1 PROXY INTERVIEW"
2="2 MISSING WALK AND REPEAT CHAIR AND BALANCE"
3="3 MISSING WALK AND REPEAT CHAIR"
4="4 MISSING WALK AND BALANCE"
5="5 MISSING REPEAT CHAIR AND BALANCE"
6="6 MISSING WALK"
7="7 MISSING REPEAT CHAIR"
8="8 MISSING BALANCE"
9="9 NO SPACE"
10="10 NO CHAIR"
11="11 NO SPACE WALK AND NO CHAIR"
12="12 NO SPACE WALK AND NON-SAFETY MISSING"
```

## SAS ALGORITHM FOR DEMENTIA

```
13="13 NO CHAIR AND NON-SAFETY MISSING"  
14="14 NON-SAFETY WALK"  
15="15 NON-SAFETY CHAIR"  
16="16 NON-SAFETY BALANCE"  
17="17 NON-SAFETY WALK AND CHAIR"  
18="18 NON-SAFETY WALK AND BALANCE"  
19="19 NON-SAFETY CHAIR AND BALANCE"  
20="20 NON SAFETY WALK AND CHAIR AND BALANCE";
```

### VALUE DCLCKSC

```
0 = '0 Not recognizable as a clock'  
1 = '1 Severely distorted depiction of a clock'  
2 = '2 Moderately distorted depiction of a clock'  
3 = '3 Mildly distorted depiction of a clock'  
4 = '4 Reasonably accurate depiction of a clock'  
5 = '5 Accurate depiction of a clock (circular or square)'  
-7 = '-7 SP refused to draw clock'  
-8 = '-8 DK'  
-1 = '-1 Inapplicable'  
-2 = '-2 Proxy says cannot ask SP'  
-3 = '-3 Proxy says can ask SP but SP unable to answer'  
-4 = '-4 SP did not attempt to draw clock'  
-9 = '-9 Missing';
```

### VALUE DCLCKCL

```
1 = '1 Very clear'  
2 = '2 Somewhat clear'  
3 = '3 Somewhat unclear'  
4 = '4 Very unclear'  
5 = '5 Blank'  
-7 = '-7 SP refused to draw clock'  
-8 = '-8 DK'  
-1 = '-1 Inapplicable'  
-2 = '-2 Proxy says cannot ask SP'  
-3 = '-3 Proxy says can ask SP but SP unable to answer'  
-4 = '-4 SP did not attempt to draw clock'  
-9 = '-9 Missing';
```

### VALUE RESULT

```
-9='-9: MISSING'  
1='1: COMPLETED W RESULTS'  
2='2: COMPLETED MISSING RESULTS'  
3='3: ATTEMPTED W RESULTS'  
4='4: ATTEMPTED MISSING RESULTS'  
5='5: NOT ATTEMPTED SAFETY'  
6='6: NOT ATTEMPTED NOT SAFETY REASON'  
7='7: NO CHAIR/NO SPACE'  
9='9: NOT ATTEMPTED/MISSING';
```

### VALUE RESULT\_SCH

```
-9='-9: MISSING'  
1='1: COMPLETED W/OUT ARMS'  
2='2: COMPLETED W ARMS'  
3='3: ATTEMPTED W RESULTS'  
4='4: ATTEMPTED MISSING RESULTS'  
5='5: NOT ATTEMPTED SAFETY'  
6='6: NOT ATTEMPTED NOT SAFETY REASON'
```

## SAS ALGORITHM FOR DEMENTIA

```
7='7: NO CHAIR/SAFETY REASON'  
8='8: NO CHAIR/NOT SAFETY REAS'  
9='9: NOT ATTEMPTED/MISSING'  
10='10: CH4=1 SINGLE CHAIR NOT COMPL';
```

```
VALUE RESULT_RCH  
-9='-9: MISSING'  
1='1: COMPLETED W/OUT ARMS'  
2='2: COMPLETED MISSING RESULTS'  
3='3: ATTEMPTED W RESULTS'  
4='4: ATTEMPTED MISSING RESULTS'  
5='5: NOT ATTEMPTED SAFETY'  
6='6: NOT ATTEMPTED NOT SAFETY REASON'  
9='9: NO CHAIR OR NOT ATTEMPTED/MISSING';
```

```
VALUE ZEROSCORE  
1="1: NOT ELIGIBLE DUE TO EXCLUSION CRITERIA"  
2="2: NOT ATTEMPTED FOR SAFETY REASON"  
3="3: ATTEMPTED CHAIR STANDS/NOT ATTEMPTED FOR SAFETY"  
4="4: ATTEMPTED"  
5="5: NEW WALKING EXCLUSION"  
9="9: NOT ASSIGNED A ZERO SCORE";
```

```
VALUE D_LMLLOC  
1 = '1 Community'  
2 = '2 Residential Care'  
-1 = '-1 Inapplicable'  
-9 = '-9 Missing';
```

```
VALUE D_LOCSP  
-7 = '-7 RF'  
-8 = '-8 DK'  
-1 = '-1 Inapplicable'  
-9 = '-9 Missing'  
1 = "1 Independent Living/Housing/Retirement"  
2 = "2 Assisted Living/Personal Care"  
3 = "3 Special Care, Memory or Alzheimer's Unit"  
4 = "4 Nursing Home"  
8 = "8 Not Reported" ;
```

```
VALUE PA25FMT  
-1 = '-1 Inapplicable'  
-9 = '-9 Missing'  
111= '111 Sleeping Napping'  
131= '131 Eating'  
132= '132 Going out to eat'  
199= '199 Other self care activities'  
211= '211 Work and work-related activities'  
221= '221 Other income generating activities'  
241= '241 Volunteering'  
299= '299 Other productive activities'  
321= '321 Shopping for non-durable goods'  
399= '399 Other shopping'  
411= '411 Food and drink preparation'  
434= '434 Outdoor Maintenance'  
439= '439 Household chores (cannot tell if indoor/outdoor)'  
441= '441 Animal and pet care'
```

## SAS ALGORITHM FOR DEMENTIA

```
442= '442 Walking and exercising pets'
449= '449 Other animal and pet care'
451= '451 Vehicle maintenance and repair'
471= '471 Financial management'
499= '499 Other household activities'
511= '511 Physical care and assistance to others'
599= '599 Other physical care'
611= '611 Socializing with others in person'
612= '612 Socializing with others on the phone'
616= '616 Socializing and communicating on the computer'
621= '621 Watching TV and movies'
631= '631 Doing puzzles or games not on computer or online'
632= '632 Gambling not online or at a casino'
636= '636 Doing puzzles or games on a computer or online'
641= '641 Arts and crafts or hobbies'
642= '642 Reading'
643= '643 Writing'
644= '644 Listening to music'
646= '646 Computer or online leisure activities'
651= '651 Smoking or other tobacco use'
652= '652 Drinking alcohol'
661= '661 Doing nothing/relaxing'
669= '669 No activity'
699= '699 Other non active leisure'
711= '711 Playing sports'
712= '712 Walking or jogging'
713= '713 Other outdoor recreating activities'
714= '714 Attending sporting events'
715= '715 Other physical activity, exercise, yoga, swimming, working out,
dancing'
718= '718 Watching sporting events'
721= '721 Attending arts including plays and concerts'
723= '723 Attending movies'
724= '724 Attending casinos'
737= '737 Travel for leisure'
799= '799 Other active leisure'
811= '811 Attending religious activities'
812= '812 Other religious and spiritual activities'
821= '821 Attending meetings or events'
899= '899 Other organizational activity'
991= '991 Other miscellaneous'
992= '992 No favorite activity'
997= '997 Refused'
998= '998 Dont Know'
999= '999 Not Codeable';

      VALUE OCC_CODE
1      ='1 Management Occupations: 0010-0430'
2      ='2 Business and Financial Operations Occupations: 0500-0950'
3      ='3 Computer and mathematical occupations: 1000-1240'
4      ='4 Architecture and Engineering Occupations: 1300-1560'
5      ='5 Life, Physical, and Social Science Occupations: 1600-1965'
6      ='6 Community and Social Service Occupations: 2000-2060'
7      ='7 Legal Occupations: 2100-2160'
8      ='8 Education, Training, and Library Occupations: 2200-2550'
9      ='9 Arts, Design, Entertainment, Sports, and Media Occupations: 2600-
2960'
```

## SAS ALGORITHM FOR DEMENTIA

```

10 = '10 Healthcare Practitioners and Technical Occupations: 3000-3540'
11 = '11 Healthcare Support Occupations: 3600-3655'
12 = '12 Protective Service Occupations: 3700-3955'
13 = '13 Food Preparation and Serving Related Occupations: 4000-4160'
14 = '14 Building and Grounds Cleaning and Maintenance Occupations: 4200-
4250'
15 = '15 Personal Care and Service Occupations: 4300-4650'
16 = '16 Sales and Related Occupations: 4700-4965'
17 = '17 Office and Administrative Support Occupations: 5000-5940'
18 = '18 Farming, Fishing, and Forestry Occupations: 6000-6130'
19 = '19 Construction and Extraction Occupations: 6200-6940'
20 = '20 Installation, Maintenance, and Repair Occupations: 7000-7630'
21 = '21 Production Occupations: 7700-8965'
22 = '22 Transportation and Material Moving Occupations: 9000-9750'
23 = '23 Military Specific Occupations: 9800-9830'
24 = '24 No current occ (Unemployed, no work in the last 5 years, never
worked): 9920'
25 = '25 Blank field'
26 = '26 Code did not match'
94 = '94 Uncodable'
95 = '95 Never Worked Entire Life'
96 = '96 Homemaker/Raised Children'
-7 = '-7 RF'
-8 = '-8 DK'
-1 = '-1 Inapplicable'
-9 = '-9 Missing';

```

Value fl\_Dfac

```

1 = '1 Should have routed as facility but did not'
2 = '2 Routed as facility but determined not facility resident'
-1 = '-1 Inapplicable';

```

VALUE PE\_RSLT

```

-9='-9 Missing'
-1 = '-1 Inapplicable'
1='1 Completed'
2='2 Attempted'
3='3 Not attempted' ;

```

VALUE dosfacd /\* FOR FQ2dosfacd \*/

```

-9= "-9 Missing"
-8 = "-8 DK"
-1 = "-1 INAPPLICABLE"
1 = " 1 FREE STANDING NURSING HOME"
2 = " 2 FREE STANDING ASSISTED LIVING FACILITY / RESIDENTIAL CARE
FACILITY"
3 = " 3 NURSING HOME AND ASSISTED LIVING FACILITY"
4 = " 4 CONTINUING CARE RETIREMENT COMMUNITY (CCRC)"
5 = " 5 ADULT FAMILY CARE HOME"
6 = " 6 GROUP HOME"
7 = " 7 BOARD AND CARE HOME / PERSONAL CARE HOME"
8 = " 8 RETIREMENT COMMUNITY OR SENIOR HOUSING (NOT CCRC)"
9 = " 9 INDEPENDENT LIVING"
10 = " 10 ASSISTED AND INDEPENDENT/RETIREMENT (NO NURSING HOME)"
11 = " 11 HOUSING (APT, CONDO, ETC.)";

```

VALUE dosfaca /\* FOR FQ2dosfaca \*/

```

-9= "-9 Missing"
-8 = "-8 DK"

```

## SAS ALGORITHM FOR DEMENTIA

```
-1 = "-1 INAPPLICABLE"
1 = " 1 INDEPENDENT LIVING / HOUSING / RETIREMENT "
2 = " 2 ASSISTED LIVING / PERSONAL CARE"
3 = " 3 SPECIAL CARE, MEMORY CARE, OR ALZHEIMER'S UNIT"
4 = " 4 NURSING HOME" ;

VALUE INAP_YN
1 = ' 1 Yes'
2 = ' 2 No'
-1 = '-1 Inapplicable' ;

VALUE CENDIV /* RE1DCENSNDIV - Updated for R2 - Re-Release */
1 = '1 Northeast Region: New England Division (ME, NH, VT, MA, RI, CT) '
2 = '2 Northeast Region: Middle Atlantic Division (NY, NJ, PA) '
3 = '3 Midwest Region: East North Central Division (OH, IN, IL, MI, WI) '
4 = '4 Midwest Region: West North Central Division (MN, IA, MO, ND, SD,
NE, KS) '
5 = '5 South Region: South Atlantic Division (DE, MD, DC, VA, WV, NC,
SC, GA, FL) '
6 = '6 South Region: East South Central Division (KY, TN, AL, MS) '
7 = '7 South Region: West South Central Division (AR, LA, OK, TX) '
8 = '8 West Region: Mountain Division (MT, ID, WY, CO, NM, AZ, UT, NV) '
9 = '9 West Region: Pacific Division (WA, OR, CA, AK, HI) '
-9 = '-9 Missing';

VALUE W000002W
-7 = '-7 RF'
-8 = '-8 DK'
-1 = '-1 Inapplicable'
-9 = '-9 Missing'
1 = "1 MALE"
2 = "2 FEMALE" ;

VALUE W000005W
1 = ' 1 Yes'
2 = ' 2 No'
-7 = '-7 RF'
-8 = '-8 DK'
-1 = '-1 Inapplicable'
-9 = '-9 Missing';

VALUE R1DRESID
1 = '1 Community '
2 = '2 Residential Care Resident not nursing home (SP interview
complete) '
3 = '3 Residential Care Resident not nursing home (FQ only) '
4 = '4 Nursing Home Resident';

VALUE W200016W
-7 = '-7 RF'
-8 = '-8 DK'
-1 = '-1 Inapplicable'
-9 = '-9 Missing'
1 = "1 MEDICAID"
2 = "2 MEDICARE"
3 = "3 STATE PROGRAM"
91 = "91 OTHER (SPECIFY)" ;
```

## SAS ALGORITHM FOR DEMENTIA

```
    VALUE W200012W
-7 = '-7 RF'
-8 = '-8 DK'
-1 = '-1 Inapplicable'
-9 = '-9 Missing'
 1 = "1 REGULAR"
 2 = "2 VARIED" ;

VALUE W200061W
-7 = '-7 RF'
-8 = '-8 DK'
-1 = '-1 Inapplicable'
-9 = '-9 Missing'
 1 = "1 SEPARATION OR DIVORCE"
 2 = "2 DECEASED"
 3 = "3 MOVED ELSEWHERE"
 5 = "5 LAST INTERVIEW INFORMATION INCORRECT"
 8 = "8 OTHER REASON" ;

VALUE d2hrsmth
-13= '-13 Deceased '
-12= '-12 Zero days/wk'
-11= '-11 Hours missing'
-10= '-10 Days missing'
-9 = ' -9 Days and hrs missing'
-1 = ' -1 Inapplicable'
-7 = ' -7 RF'
-8 = ' -8 DK'
 0-<1  = '<1'
 1-<10 = ' 1-<10'
10-<20 = '10-<20'
20-<30 = '20-<30'
30-<40 = '30-<40'
40-<60 = '40-<60'
60-<120 = '60-<120'
120-<180 = '120-<180'
180-744 = '180-744 (24/7)'
 9999 = '9999 Not codeable, <1 hour/day' ;

VALUE dhrsmth
-11= '-11:hours missing'
-10= '-10:days missing'
-9 = '-9:days and hrs missing'
-1 = '-1 Inapplicable'
-7 = '-7 RF'
-8 = '-8 DK'
 0-<1  = '<1'
 1-<10 = ' 1-<10'
10-<20 = '10-<20'
20-<30 = '20-<30'
30-<40 = '30-<40'
40-<60 = '40-<60'
60-<120 = '60-<120'
120-<180 = '120-<180'
180-744 = '180-744 (24/7)'
 9999 = '9999 Not codeable, <1 hour/day' ;
```

## SAS ALGORITHM FOR DEMENTIA

```
Value dmissadd
-1='-1 not applicable'
1='1 no flags and added at CL section'
2='2 no flags and added at DT section'
3='3 no flags and added at EW section'
4='4 no flags and added at HA section'
5='5 no flags and added at HO section'
6='6 no flags and added at MC section'
7='7 no flags and added at MO section'
8='8 no flags and added at PA section'
9='9 no flags and added at PE section'
10='10 no flags and added at SC section'
11='11 no flags and added at SN section';

Value d2mssadd
-1='-1 not applicable'
0='0 no flags and added at undetermined section'
1='1 no flags and added at CL section'
2='2 no flags and added at DT section'
3='3 no flags and added at EW section'
4='4 no flags and added at HA section'
5='5 no flags and added at HO section'
6='6 no flags and added at MC section'
7='7 no flags and added at MO section'
8='8 no flags and added at PA section'
9='9 no flags and added at PE section'
10='10 no flags and added at SC section'
11='11 no flags and added at SN section'
12='12 no flags and added at CS section'
13='13 no flags and added at HH section'
14='14 no flags and added at IS section';

Value dopage3c
-9='-9 Missing'
-8='-8 RF'
-7='-7 DK'
-1='-1 Inapplicable'
1='1 UNDER 30'
2='2 30-39'
3='3 40-49'
4='4 50-59'
5='5 60-69'
6='6 70-79'
7='7 80-89'
8='8 90 +';

Value dopagect
-9='-9 Missing'
-8='-8 DK'
-7='-7 RF'
-1='-1 Inapplicable'
1='1 UNDER 20'
2='2 20-24'
3='3 25-29'
4='4 30-34'
5='5 35-39'
6='6 40-44'
```



## SAS ALGORITHM FOR DEMENTIA

```
7='7 45-49'  
8='8 50-54'  
9='9 55-59'  
10='10 60-64'  
11='11 65-69'  
12='12 70-74'  
13='13 75-79'  
14='14 80-84'  
15='15 85-89'  
16='16 90 +';
```

```
VALUE W200008W
```

```
-7 = '-7 RF'  
-8 = '-8 DK'  
-1 = '-1 Inapplicable'  
-9 = '-9 Missing'  
1 = "1 UNDER 20"  
2 = "2 20-24"  
3 = "3 25-29"  
4 = "4 30-34"  
5 = "5 35-39"  
6 = "6 40-44"  
7 = "7 45-49"  
8 = "8 50-54"  
9 = "9 55-59"  
10 = "10 60-65"  
11 = "11 66-69"  
12 = "12 70-74"  
13 = "13 75-79"  
14 = "14 80-85"  
15 = "15 86-89"  
16 = "16 90-94"  
17 = "17 95-99"  
18 = "18 100 +"
```

```
;
```

```
VALUE NumCigs
```

```
-7 = '-7 RF'  
-8 = '-8 DK'  
-1 = '-1 Inapplicable'  
-9 = '-9 Missing'  
999 = '999 SP smokes less than 1 cigarette / day';
```

```
VALUE dlmlint
```

```
1 = '1 Last month of life interview'  
-1 = '-1 Inapplicable' ;
```

```
VALUE d2intvra
```

```
1 = '1 65 to 69'  
2 = '2 70 to 74'  
3 = '3 75 to 79'  
4 = '4 80 to 84'  
5 = '5 85 to 89'  
6 = '6 90+'  
-7 = '-7 RF'  
-8 = '-8 DK'
```

## SAS ALGORITHM FOR DEMENTIA

```
-1 = '-1 Inapplicable'
-9 = '-9 Missing' ;

VALUE dad8dem
  1 = '1 DEMENTIA RESPONSE TO ANY AD8 ITEMS IN PRIOR ROUND'
-1 = '-1 Inapplicable' ;

VALUE dwrdinon
  1 = '1 NO WORDS REMEMBERED'
-1 = '-1 Inapplicable'
-9 = '-9 Missing' ;

VALUE dwrdirre
  1 = '1 REFUSED WORD RECALL TASK'
-1 = '-1 Inapplicable'
-9 = '-9 Missing' ;

VALUE A0001AB
  1 = "1 AM"
  2 = "2 PM"
-1 = '-1 Inapplicable'
-9 = '-9 Missing';

VALUE A0002WA
  1 = "1 Yes, there is space to set up the walking course"
  2 = "2 No, there is not space to set up the walking course"
-1 = '-1 Inapplicable'
-9 = '-9 Missing';

VALUE A0004WA
  1 = "1 None"
  2 = "2 Cane"
  3 = "3 Walker or rollator"
  9 = "9 Other, specify"
-1 = '-1 Inapplicable'
-7 = '-7 RF'
-8 = '-8 DK'
-9 = '-9 Missing';

VALUE A0004CH
  1 = "1 No, chair stand not completed"
  2 = "2 Yes, chair stand completed"
-1 = '-1 Inapplicable'
-9 = '-9 Missing';

VALUE A0008CH
  1 = "1 With arms"
  2 = "2 Without arms"
-1 = '-1 Inapplicable'
-9 = '-9 Missing';

VALUE A0014CH
  1 = "1 1 Chair stand completed"
  2 = "2 2 Chair stands completed"
  3 = "3 3 Chair stands completed"
  4 = "4 4 Chair stands completed"
-1 = '-1 Inapplicable'
```

## SAS ALGORITHM FOR DEMENTIA

```
-9 = '-9 Missing';
```

### VALUE BA1SS

```
1 = '1 Eligible and recorded result for SxS Balance'  
2 = '2 Eligible and no recorded result for SxS Balance'  
4 = '4 Not Eligible due to exclusion criteria'  
-1 = '-1 Inapplicable'  
-9 = '-9 Missing';
```

### VALUE BA1STAN

```
1 = '1 Eligible and recorded result for Semi Tandem Balance'  
2 = '2 Eligible and no recorded result for Semi Tandem Balance'  
3 = '3 Not administered because did not complete prior balance test'  
4 = '4 Not Eligible due to exclusion criteria'  
-1 = '-1 Inapplicable'  
-9 = '-9 Missing';
```

### VALUE BA1TAN

```
1 = '1 Eligible and recorded result for full tandem balance'  
2 = '2 Eligible and no recorded result for full tandem balance'  
3 = '3 Not administered because did not complete prior balance tests'  
4 = '4 Not Eligible due to exclusion criteria'  
-1 = '-1 Inapplicable'  
-9 = '-9 Missing';
```

### VALUE BA1OP

```
1 = '1 Eligible and recorded result for one leg eyes open balance'  
2 = '2 Eligible and no recorded result for one leg eyes open balance'  
3 = '3 Not administered because did not complete prior balance tests'  
4 = '4 Not Eligible due to exclusion criteria'  
-1 = '-1 Inapplicable'  
-9 = '-9 Missing';
```

### VALUE BA1CL

```
1 = '1 Eligible and recorded result for one leg eyes closed balance'  
2 = '2 Eligible and no recorded result for one leg eyes closed balance'  
3 = '3 Not administered because did not complete prior balance tests'  
4 = '4 Not Eligible due to exclusion criteria'  
-1 = '-1 Inapplicable'  
-9 = '-9 Missing';
```

### VALUE WA1WLK

```
1 = '1 Eligible and recorded result for walking course'  
2 = '2 Eligible and no recorded result for walking course'  
4 = '4 Not Eligible due to exclusion criteria'  
5 = '5 Not Eligible on exclusion criteria but recorded result (SP changed  
mind)'  
-1 = '-1 Inapplicable '  
-9 = '-9 Missing';
```

### VALUE CH1SCH

```
1 = '1 Eligible and recorded result for single chair stand'  
2 = '2 Eligible and no recorded result for single chair stand'  
4 = '4 Not Eligible due to exclusion criteria'  
-1 = '-1 Inapplicable'  
-9 = '-9 Missing';
```

## SAS ALGORITHM FOR DEMENTIA

```
VALUE CH1RSH
  1 = '1 Eligible and recorded result for repeated chair stand'
  2 = '2 Eligible and no recorded result for repeated chair stand'
  3 = '3 Not administered because did not complete single chair stand w/o
arms'
  4 = '4 Not Eligible due to exclusion criteria'
 -1 = '-1 Inapplicable'
 -9 = '-9 Missing';

VALUE GR1GRIP
  1 = '1 Eligible and recorded result for grip strength'
  2 = '2 Eligible and no recorded result for grip strength'
  4 = '4 Not Eligible due to exclusion criteria'
 -1 = '-1 Inapplicable'
 -9 = '-9 Missing';

VALUE WC1WAIST
  1 = '1 Eligible and recorded result for waist circumference'
  2 = '2 Eligible and no recorded result for waist circumference'
 -1 = '-1 Inapplicable'
 -9 = '-9 Missing';

VALUE PK1PEAK
  1 = '1 Eligible and recorded result for peak air flow'
  2 = '2 Eligible and no recorded result for peak air flow'
 -1 = '-1 Inapplicable'
 -9 = '-9 Missing';

VALUE RGT_LFT
  1 = '1 Right'
  2 = '2 Left'
 -1 = '-1 Inapplicable'
 -9 = '-9 Missing';

VALUE PERSON
  1 = '1 Interviewer'
  2 = '2 Sample person'
 -1 = '-1 Inapplicable'
 -9 = '-9 Missing';

VALUE STAND
  1 = '1 Standing'
  2 = '2 Sitting'
  3 = '3 Lying down'
 -1 = '-1 Inapplicable'
 -9 = '-9 Missing';

VALUE EFFORT
  1 = '1 Full effort'
  2 = '2 Less effort for health reason'
  3 = '3 Less effort for other reason'
 -1 = '-1 Inapplicable'
 -9 = '-9 Missing';

VALUE WORDREC
  1 = ' 1 LIST 1'
  2 = ' 2 LIST 2'
  3 = ' 3 LIST 3'
```

## SAS ALGORITHM FOR DEMENTIA

```
-1 = '-1 Inapplicable '  
-9 = '-9 Missing';  
VALUE WORDRE_N  
  -1 = '-1 Inapplicable'  
  -2 = '-2 Proxy says cannot ask SP'  
  -3 = '-3 Proxy says can ask SP but SP unable to answer'  
  -7 = '-7 SP refused activity'  
  -9 = '-9 Missing';  
  
VALUE DMH_GRP  
  1 = "1 Help started"  
  2 = "2 Help ended"  
  3 = "3 Help both interviews with gap"  
  4 = "4 Help both interviews with no gap"  
  5 = "5 Help between interviews only (month ended missing)"  
  6 = "6 No help either interview or between"  
 11 = "11 Help started (month started missing)"  
 21 = "21 Help ended (month ended missing)"  
 41 = "41 Help both interviews (DK whether gap)"  
 61 = "61 No help either interview (DK whether help between)"  
  -9 = "-9 Missing"  
  -1 = "-1 Inapplicable"  
 -999 = "-999 Not determined" ;  
  
VALUE DMU_GRP  
  1 = "1 Use started"  
  2 = "2 Use ended"  
  3 = "3 Use both interviews with gap"  
  4 = "4 Use both interviews with no gap"  
  5 = "5 Use between interviews only (month ended missing)"  
  6 = "6 No use either interview or between"  
 11 = "11 Use started (month started missing)"  
 21 = "21 Use ended (month ended missing)"  
 41 = "41 Use both interviews (DK whether gap)"  
 61 = "61 No use either interview (DK whether use between)"  
  -9 = "-9 Missing"  
  -1 = "-1 Inapplicable"  
 -999 = "-999 Not determined" ;  
  
VALUE DS_GRP  
  1 = "1 Help started"  
  2 = "2 Help ended"  
  3 = "3 Help both interviews with gap"  
  4 = "4 Help both interviews with no gap"  
  5 = "5 Help between interviews only"  
  6 = "6 No help either interview or between"  
 11 = "11 Help started (month started missing)"  
 21 = "21 Help ended (month ended missing)"  
 41 = "41 Help both interviews (DK whether gap)"  
 61 = "61 No help either interview (DK whether help between)"  
  -9 = "-9 Missing"  
  -1 = "-1 Inapplicable"  
 -999 = "-999 Not determined" ;  
  
VALUE DMDSINTV  
  0 = "0 Less than 1 month"  
  1 = "1 Month"
```

## SAS ALGORITHM FOR DEMENTIA

```
2 = "2 Months"  
3 = "3 Months"  
4 = "4 Months"  
5 = "5 Months"  
6 = "6 Months"  
7 = "7 Months"  
8 = "8 Months"  
9 = "9 Months"  
10 = "10 Months"  
11 = "11 Months"  
12 = "12 Months"  
13 = "13 Months"  
14 = "14 Months"  
15 = "15 Months"  
16 = "16 Months"  
17 = "17 Months"  
18 = "18 Months"  
19 = "19 Months"  
20 = "20 Months"  
90 = "90 Last round disputed"  
-1 = "-1 Inapplicable"  
-7 = "-7 Refused"  
-8 = "-8 Dont know"  
-9 = "-9 Missing" ;
```

```
VALUE DMDS_DUR  
0 = "0 Less than 1 month"  
1 = "1 Month"  
2 = "2 Months"  
3 = "3 Months"  
4 = "4 Months"  
5 = "5 Months"  
6 = "6 Months"  
7 = "7 Months"  
8 = "8 Months"  
9 = "9 Months"  
10 = "10 Months"  
11 = "11 Months"  
12 = "12 Months"  
13 = "13 Months"  
14 = "14 Months"  
15 = "15 Months"  
16 = "16 Months"  
17 = "17 Months"  
90 = "90 Last round disputed"  
-1 = "-1 Inapplicable"  
-7 = "-7 Refused"  
-8 = "-8 Dont know"  
-9 = "-9 Missing"  
-10 = "-10 Not ascertained"  
-12 = "-12 Outside of range"  
-13 = "-13 None" ;
```

```
VALUE DMDSFLG  
-1 = "-1 Inapplicable"  
1 = "1 No SP interview last round"  
2 = "2 Died and month death missing"
```

## SAS ALGORITHM FOR DEMENTIA

```

    3 = "3 Died <=1 month after last interview"
    4 = "4 Died 12-13 months after last interview"
    5 = "5 Died and not mobile (fl2notmobile=1)"
    6 = "6 Died and not alert (fl2notalert =1)"
    7 = "7 Skipped 1 or more help questions" ;

run;

/*=====*/

/* NHATS_Round_3_Combined_PROC_FORMAT_Statement.sas */

PROC FORMAT ;

    VALUE release
        1 = '1 Main Sample'
        2 = '2 Reserve Sample'
        9 = '9 New Release Sample';

    VALUE STAT_DTa
        4 = " 4 April"
        5 = " 5 May"
        6 = " 6 June"
        7 = " 7 July"
        8 = " 8 August"
        9 = " 9 September"
       10 = "10 October"
       11 = "11 November"
       99 = "99 Prior to start of field work"
       -1 = '-1 Inapplicable';

    VALUE $DISP
        '10' = "10 Not Available "
        '11' = "11 Ready"
        '12' = "12 Started "
        '20' = "20 Final "
        '24' = "24 Not Required "
        '60' = "60 Complete "
        '61' = "61 Complete, NH facility"
        '62' = "62 Complete SP Deceased, Proxy Intv"
        '63' = "63 Complete SP, FQ not complete"
        '64' = "64 Complete FQ, SP not complete"
        '75' = "75 Physically/mentally unable to participate, no proxy"
        '76' = "76 Too ill to participate, no proxy"
        '77' = "77 Refusal, SP"
        '78' = "78 Language barrier"
        '79' = "79 Unable to locate"
        '80' = "80 Unavailable during field period"
        '82' = "82 Outside of PSU"
        '83' = "83 Ineligible"
        '85' = "85 Refusal, facility"
        '86' = "86 Deceased"
        '87' = "87 Refusal, proxy"
        '88' = "88 Work stopped" ;

    VALUE DISP_a
        10 = "10 Not Available"
```

## SAS ALGORITHM FOR DEMENTIA

```
11 = "11 Ready"
12 = "12 Started"
20 = "20 Final"
24 = "24 Not Required"
60 = "60 Complete"
61 = "61 Complete, NH facility"
62 = "62 Complete SP Deceased, Proxy Intv"
63 = "63 Complete SP, FQ not complete"
64 = "64 Complete FQ, SP not complete "
75 = "75 Physically/mentally unable to participate, no proxy"
76 = "76 Too ill to participate, no proxy"
77 = "77 Refusal, SP"
78 = "78 Language barrier"
79 = "79 Unable to locate"
80 = "80 Unavailable during field period"
82 = "82 Outside of PSU"
83 = "83 Ineligible"
85 = "85 Refusal, facility"
86 = "86 Deceased"
87 = "87 Refusal, proxy"
88 = "88 Work stopped" ;

VALUE DISP_
10 = "10 Not Available"
11 = "11 Ready"
12 = "12 Started"
20 = "20 Final"
24 = "24 Not Required";

VALUE DISP_F
-1 = '-1 Inapplicable'
10 = "10 Not Available"
11 = "11 Ready"
12 = "12 Started"
20 = "20 Final"
24 = "24 Not Required"
60 = "60 Complete"
61 = "61 Complete, NH facility"
62 = "62 Complete SP Deceased, Proxy Intv"
63 = "63 Complete SP, FQ not complete"
64 = "64 Complete FQ, SP not complete "
75 = "75 Physically/mentally unable to participate, no proxy"
76 = "76 Too ill to participate, no proxy"
77 = "77 Refusal, SP"
78 = "78 Language barrier"
79 = "79 Unable to locate"
80 = "80 Unavailable during field period"
82 = "82 Outside of PSU"
83 = "83 Ineligible"
85 = "85 Refusal, facility"
86 = "86 Deceased"
87 = "87 Refusal, proxy"
88 = "88 Work stopped"
89 = "89 Final, Other Specify";

VALUE RFDK
-7 = '-7 RF'
```



## SAS ALGORITHM FOR DEMENTIA

```
-8 = '-8 DK'  
-1 = '-1 Inapplicable'  
-9 = '-9 Missing';
```

```
VALUE $RFDK_F  
'-7' = '-7 RF'  
'-8' = '-8 DK'  
'-1' = '-1 Inapplicable'  
'-9' = '-9 Missing';
```

```
VALUE RFDK_F  
-7 = '-7 RF'  
-8 = '-8 DK'  
-1 = '-1 Inapplicable'  
-9 = '-9 Missing';
```

```
VALUE RFDK_B  
-1 = '-1 Inapplicable'  
1 = '1 Yes-Breakoff';
```

```
VALUE $RFDK_C  
'-1' = '-1 Inapplicable'  
'CL' = 'CL - Closing'  
'EW' = 'EW - Economic Well-Being'  
'FQ' = 'FQ - Facility Questionnaire'  
'HL' = 'HL - Helper'  
'HW' = 'HW - Height and Weight'  
'IP' = 'IP - Insurance Plans'  
'LF' = 'LF - Labor Force'  
'PA' = 'PA - Participation'  
'PE' = 'PE - Performance'  
'WB' = 'WB - Well-being' ;
```

```
VALUE $RFDK_2C  
'-1' = '-1 Inapplicable'  
'-7' = '-7 RF'  
'-8' = '-8 DK'  
'-9' = '-9 Missing';
```

```
VALUE RFDK_Y  
1 = '1 Yes'  
-7 = '-7 RF'  
-8 = '-8 DK'  
-1 = '-1 Inapplicable'  
-9 = '-9 Missing';
```

```
VALUE RFDK_YN  
1 = '1 Yes'  
2 = '2 No'  
-7 = '-7 RF'  
-8 = '-8 DK'  
-1 = '-1 Inapplicable'  
-9 = '-9 Missing';
```

```
VALUE DSTRP_G  
-7 = '-7 RF'  
-8 = '-8 DK'
```

## SAS ALGORITHM FOR DEMENTIA

```
-1 = '-1 Inapplicable'  
-9 = '-9 Missing'  
1 = '1 X condition and word color condition accuracy below threshold  
(less than .42)'  
2 = '2 word condition only below threshold (less than .42)'  
3 = '3 X condition and word color condition meet criteria for accuracy'  
4 = '4 fewer than 50% of X and word color condition trials answered'  
999 = '999 X condition only below threshold (less than .42)';
```

```
VALUE DSTRP_R  
-7 = '-7 RF'  
-8 = '-8 DK'  
-1 = '-1 Inapplicable'  
-999 = '-999 Inapplicable'  
other = 'Values ranging between -.353 and 1.115';
```

```
VALUE DSTRP_M  
-7 = '-7 RF'  
-8 = '-8 DK'  
-1 = '-1 Inapplicable'  
-999 = '-999 Inapplicable'  
other = 'Values ranging between -544.732 and 924.863';
```

```
VALUE FQ_4F  
-7 = '-7 RF'  
-8 = '-8 DK'  
-1 = '-1 Inapplicable'  
-9 = '-9 Missing'  
    1='1 YES'  
    2='2 NO';
```

```
VALUE CHILDDC  
1 = '1 CHILD DECEASED'  
-7 = '-7 RF'  
-8 = '-8 DK'  
-1 = '-1 Inapplicable'  
-9 = '-9 Missing';
```

```
VALUE W200001W  
12 = "12 STARTED"  
20 = "20 COMPLETE"  
21 = "21 INELIGIBLE - NOT 65+" ;
```

```
VALUE W200008x  
-7 = '-7 RF'  
-8 = '-8 DK'  
-1 = '-1 Inapplicable'  
-9 = '-9 Missing'  
1 = "1 UNDER 20"  
2 = "2 20-24"  
3 = "3 25-29"  
4 = "4 30-34"  
5 = "5 35-39"  
6 = "6 40-44"  
7 = "7 45-49"  
8 = "8 50-54"  
9 = "9 55-59"
```

## SAS ALGORITHM FOR DEMENTIA

```
10 = "10 60-64"  
11 = "11 65-69"  
12 = "12 70-74"  
13 = "13 75-79"  
14 = "14 80-84"  
15 = "15 85-89"  
16 = "16 90 +";  
  
VALUE W200009W  
-7 = '-7 RF'  
-8 = '-8 DK'  
-1 = '-1 Inapplicable'  
-9 = '-9 Missing'  
1 = "1 SAMPLE PERSON"  
2 = "2 SPOUSE/ PARTNER"  
3 = "3 DAUGHTER"  
4 = "4 SON"  
5 = "5 DAUGHTER-IN-LAW"  
6 = "6 SON-IN-LAW"  
7 = "7 STEPDAUGHTER"  
8 = "8 STEPSON"  
9 = "9 SISTER"  
10 = "10 BROTHER"  
11 = "11 SISTER-IN-LAW"  
12 = "12 BROTHER-IN-LAW"  
13 = "13 MOTHER"  
14 = "14 STEPMOTHER"  
15 = "15 MOTHER-IN-LAW"  
16 = "16 FATHER"  
17 = "17 STEPFATHER"  
18 = "18 FATHER-IN-LAW"  
19 = "19 GRANDDAUGHTER"  
20 = "20 GRANDSON"  
21 = "21 NIECE"  
22 = "22 NEPHEW"  
23 = "23 AUNT"  
24 = "24 UNCLE"  
25 = "25 COUSIN"  
26 = "26 STEPDAUGHTER'S SON/ DAUGHTER"  
27 = "27 STEPSON'S SON/ DAUGHTER"  
28 = "28 DAUGHTER-IN-LAW'S SON/ DAUGHTER"  
29 = "29 SON-IN-LAW'S SON/ DAUGHTER"  
30 = "30 BOARDER/RENTER"  
31 = "31 PAID AIDE/ HOUSEKEEPER/ EMPLOYEE"  
32 = "32 ROOMMATE"  
33 = "33 EX-WIFE/ EX-HUSBAND"  
34 = "34 BOYFRIEND/ GIRLFRIEND"  
35 = "35 NEIGHBOR"  
36 = "36 FRIEND"  
37 = "37 SOMEONE/SERVICE AT THE PLACE SP LIVES/LIVED"  
38 = "38 CO-WORKER"  
39 = "39 MINISTER, PRIEST, OR OTHER CLERGY"  
40 = "40 PSYCHIATRIST, PSYCHOLOGIST, COUNSELOR, OR THERAPIST"  
41 = "41 DECEASED SPOUSE/PARTNER"  
91 = "91 OTHER RELATIVE"  
92 = "92 OTHER NONRELATIVE" ;
```

## SAS ALGORITHM FOR DEMENTIA

```
VALUE W200002W
-7 = '-7 RF'
-8 = '-8 DK'
-1 = '-1 Inapplicable'
-9 = '-9 Missing'
 1 = "1 MALE"
 2 = "2 FEMALE";

VALUE W200005W
-7 = '-7 RF'
-8 = '-8 DK'
-1 = '-1 Inapplicable'
-9 = '-9 Missing'
 1 = "1 NO SCHOOLING COMPLETED"
 2 = "2 1ST-8TH GRADE"
 3 = "3 9TH-12TH GRADE (NO DIPLOMA)"
 4 = "4 HIGH SCHOOL GRADUATE (HIGH SCHOOL DIPLOMA OR EQUIVALENT)"
 5 = "5 VOCATIONAL, TECHNICAL, BUSINESS, OR TRADE SCHOOL CERTIFICATE OR
DIPLOMA (BEYOND HIGH SCHOOL LEVEL)"
 6 = "6 SOME COLLEGE BUT NO DEGREE"
 7 = "7 ASSOCIATE'S DEGREE"
 8 = "8 BACHELOR'S DEGREE"
 9 = "9 MASTER'S, PROFESSIONAL, OR DOCTORAL DEGREE" ;

VALUE W200010W
-7 = '-7 RF'
-8 = '-8 DK'
-1 = '-1 Inapplicable'
-9 = '-9 Missing'
 1 = "1 MARRIED"
 2 = "2 LIVING WITH A PARTNER"
 3 = "3 SEPARATED"
 4 = "4 DIVORCED"
 5 = "5 WIDOWED"
 6 = "6 NEVER MARRIED";

VALUE W200011W
-7 = '-7 RF'
-8 = '-8 DK'
-1 = '-1 Inapplicable'
-9 = '-9 Missing'
 1 = "1 YES"
 2 = "2 NO"
 7 = "7 PREVIOUSLY REPORTED" ;

VALUE W200012W
-7 = '-7 RF'
-8 = '-8 DK'
-1 = '-1 Inapplicable'
-9 = '-9 Missing'
 1 = "1 REGULAR"
 2 = "2 VARIED" ;

VALUE W200013W
-7 = '-7 RF'
-8 = '-8 DK'
-1 = '-1 Inapplicable'
-9 = '-9 Missing'
```

## SAS ALGORITHM FOR DEMENTIA

```
1 = "1 SP AND/OR FAMILY"  
2 = "2 GOVERNMENT PROGRAM"  
3 = "3 INSURANCE"  
91 = "91 OTHER (SPECIFY)" ;
```

```
VALUE W200015W  
-7 = '-7 RF'  
-8 = '-8 DK'  
-1 = '-1 Inapplicable'  
-9 = '-9 Missing'  
1='1 HOURLY'  
2='2 WEEKLY'  
3='3 MONTHLY'  
4='4 DID NOT PAY IN LAST MONTH'  
91 = "91 OTHER (SPECIFY)" ;
```

```
VALUE W200016W  
-7 = '-7 RF'  
-8 = '-8 DK'  
-1 = '-1 Inapplicable'  
-9 = '-9 Missing'  
1 = "1 MEDICAID"  
2 = "2 MEDICARE"  
3 = "3 STATE PROGRAM"  
91 = "91 OTHER (SPECIFY)" ;
```

```
VALUE W200018W  
-7 = '-7 RF'  
-8 = '-8 DK'  
-1 = '-1 Inapplicable'  
-9 = '-9 Missing'  
1 = "1 FREE-STANDING (DETACHED) SINGLE HOUSE"  
2 = "2 SINGLE HOUSE BUT ATTACHED TO OTHERS (ROW HOUSE, TOWNHOUSE, DUPLEX,  
TRIPLEX, OR TRIPLE DECKER)"  
3 = "3 MOBILE HOME OR TRAILER"  
4 = "4 MULTI-UNIT (2+) BUILDING"  
91 = "91 OTHER (SPECIFY)" ;
```

```
VALUE W200020W  
-7 = '-7 RF'  
-8 = '-8 DK'  
-1 = '-1 Inapplicable'  
-9 = '-9 Missing'  
1 = "1 HOME"  
2 = "2 MULTI-UNIT"  
3 = "3 OTHER" ;
```

```
VALUE W200021W  
-7 = '-7 RF'  
-8 = '-8 DK'  
-1 = '-1 Inapplicable'  
-9 = '-9 Missing'  
1 = "1 BUILDING HAS ONE FLOOR"  
2 = "2 BUILDING HAS MULTIPLE FLOORS" ;
```

```
VALUE W200022W  
-7 = '-7 RF'
```

## SAS ALGORITHM FOR DEMENTIA

```
-8 = '-8 DK'  
-1 = '-1 Inapplicable'  
-9 = '-9 Missing'  
1 = "1 HOME"  
2 = "2 APARTMENT"  
3 = "3 ROOM"  
4 = "4 UNIT"  
5 = "5 SUITE"  
6 = "6 SOMETHING ELSE (SPECIFY)" ;
```

VALUE W200030W

```
-7 = '-7 RF'  
-8 = '-8 DK'  
-1 = '-1 Inapplicable'  
-9 = '-9 Missing'  
1 = "1 SAMPLE PERSON (SP)"  
2 = "2 PROXY" ;
```

VALUE W200032W

```
-7 = '-7 RF'  
-8 = '-8 DK'  
-1 = '-1 Inapplicable'  
-9 = '-9 Missing'  
1 = "1 HOSPITAL"  
2 = "2 NURSING HOME/REHAB CENTER"  
91 = "91 OTHER (SPECIFY)" ;
```

VALUE W200035W

```
-1 = '-1 Inapplicable'  
-9 = '-9 Missing'  
1 = "1 SELF"  
2 = "2 SPOUSE/ PARTNER"  
3 = "3 DAUGHTER"  
4 = "4 SON"  
5 = "5 DAUGHTER-IN-LAW"  
6 = "6 SON-IN-LAW"  
7 = "7 STEPDAUGHTER"  
8 = "8 STEPSON"  
9 = "9 SISTER"  
10 = "10 BROTHER"  
11 = "11 SISTER-IN-LAW"  
12 = "12 BROTHER-IN-LAW"  
13 = "13 MOTHER"  
14 = "14 STEPMOTHER"  
15 = "15 MOTHER-IN-LAW"  
16 = "16 FATHER"  
17 = "17 STEPFATHER"  
18 = "18 FATHER-IN-LAW"  
19 = "19 GRANDDAUGHTER"  
20 = "20 GRANDSON"  
21 = "21 NIECE"  
22 = "22 NEPHEW"  
23 = "23 AUNT"  
24 = "24 UNCLE"  
25 = "25 COUSIN"  
26 = "26 STEPDAUGHTER'S SON/ DAUGHTER"  
27 = "27 STEPSON'S SON/ DAUGHTER"
```

## SAS ALGORITHM FOR DEMENTIA

```
28 = "28 DAUGHTER-IN-LAW'S SON/ DAUGHTER"  
29 = "29 SON-IN-LAW'S SON/ DAUGHTER"  
30 = "30 BOARDER/RENTER"  
31 = "31 PAID AIDE/ HOUSEKEEPER/ EMPLOYEE"  
32 = "32 ROOMMATE"  
33 = "33 EX-WIFE/ EX-HUSBAND"  
34 = "34 BOYFRIEND/ GIRLFRIEND"  
35 = "35 NEIGHBOR"  
36 = "36 FRIEND"  
37 = "37 SOMEONE/SERVICE FROM THE PLACE SP LIVES/DIED"  
38 = "38 CO-WORKER"  
39 = "39 MINISTER, PRIEST, OR OTHER CLERGY"  
40 = "40 PSYCHIATRIST, PSYCHOLOGIST, COUNSELOR, OR THERAPIST"  
91 = "91 OTHER RELATIVE"  
92 = "92 OTHER NONRELATIVE" ;
```

VALUE W200036W

```
-7 = '-7 RF'  
-8 = '-8 DK'  
-1 = '-1 Inapplicable'  
-9 = '-9 Missing'  
1 = "1 VERY FAMILIAR"  
2 = "2 SOMEWHAT FAMILIAR"  
3 = "3 A LITTLE FAMILIAR"  
4 = "4 NOT AT ALL FAMILIAR" ;
```

VALUE W200037W

```
-7 = '-7 RF'  
-8 = '-8 DK'  
-1 = '-1 Inapplicable'  
-9 = '-9 Missing'  
1 = "1 YES, SAME ADDRESS"  
2 = "2 NO, DIFFERENT ADDRESS"  
3 = "3 YES, SAME ADDRESS WITH MINOR CORRECTIONS" ;
```

VALUE W200038W

```
-7 = '-7 RF'  
-8 = '-8 DK'  
-1 = '-1 Inapplicable'  
-9 = '-9 Missing'  
1 = "1 JANUARY"  
2 = "2 FEBRUARY"  
3 = "3 MARCH"  
4 = "4 APRIL"  
5 = "5 MAY"  
6 = "6 JUNE"  
7 = "7 JULY"  
8 = "8 AUGUST"  
9 = "9 SEPTEMBER"  
10 = "10 OCTOBER"  
11 = "11 NOVEMBER"  
12 = "12 DECEMBER" ;
```

VALUE W200039W

```
-7 = '-7 RF'  
-8 = '-8 DK'  
-1 = '-1 Inapplicable'
```

## SAS ALGORITHM FOR DEMENTIA

```
-9 = '-9 Missing'  
1 = "1 2011"  
2 = "2 2012"  
3 = "3 YEAR2013"  
4 = "4 YEAR2014"  
5 = "5 YEAR2015"  
6 = "6 YEAR2016"  
7 = "7 YEAR2017"  
8 = "8 YEAR2018"  
9 = "9 YEAR2019"  
10 = "10 YEAR2020" ;
```

VALUE W200040W

```
-7 = '-7 RF'  
-8 = '-8 DK'  
-1 = '-1 Inapplicable'  
-9 = '-9 Missing'  
1 = "1 2011"  
2 = "2 2012" ;
```

VALUE W200041W

```
-7 = '-7 RF'  
-8 = '-8 DK'  
-1 = '-1 Inapplicable'  
-9 = '-9 Missing'  
1 = "1 AT SPS OR SOMEONE ELSE'S HOME"  
2 = "2 IN A HOSPITAL"  
3 = "3 IN A NURSING HOME"  
4 = "4 IN A HOSPICE RESIDENCE"  
5 = "5 IN TRANSIT (AMBULANCE TO HOSPITAL)"  
91 = "91 SOMEWHERE ELSE (SPECIFY)";
```

VALUE W200042W

```
-7 = '-7 RF'  
-8 = '-8 DK'  
-1 = '-1 Inapplicable'  
-9 = '-9 Missing'  
1 = "1 SP'S HOME"  
2 = "2 SOMEONE ELSE'S HOME" ;
```

VALUE W200043W

```
-7 = '-7 RF'  
-8 = '-8 DK'  
-1 = '-1 Inapplicable'  
-9 = '-9 Missing'  
1 = "1 INTENSIVE CARE UNIT"  
2 = "2 PALLIATIVE CARE UNIT"  
3 = "3 INPATIENT HOSPICE UNIT"  
4 = "4 EMERGENCY ROOM"  
5 = "5 ANOTHER KIND OF UNIT" ;
```

VALUE W200044W

```
-7 = '-7 RF'  
-8 = '-8 DK'  
-1 = '-1 Inapplicable'  
-9 = '-9 Missing'  
1 = "1 HOSPICE AT A HOSPITAL"
```



## SAS ALGORITHM FOR DEMENTIA

```
2 = "2 HOSPICE AT A NURSING HOME"  
3 = "3 RESIDENTIAL HOSPICE"  
4 = "4 OTHER HOSPICE" ;
```

```
VALUE W200045W  
-7 = '-7 RF'  
-8 = '-8 DK'  
-1 = '-1 Inapplicable'  
-9 = '-9 Missing'  
1 = "1 DAYS"  
2 = "2 WEEKS"  
3 = "3 MONTHS"  
4 = "4 YEARS" ;
```

```
VALUE W200046W  
-7 = '-7 RF'  
-8 = '-8 DK'  
-1 = '-1 Inapplicable'  
-9 = '-9 Missing'  
1 = "1 AT SP'S HOME"  
2 = "2 IN A HOSPITAL"  
3 = "3 IN A NURSING HOME"  
4 = "4 IN A HOSPICE RESIDENCE"  
91 = "91 SOMEWHERE ELSE (SPECIFY)" ;
```

```
VALUE W200047W  
-7 = '-7 RF'  
-8 = '-8 DK'  
-1 = '-1 Inapplicable'  
-9 = '-9 Missing'  
1 = "1 EVERY DAY"  
2 = "2 MOST DAYS"  
3 = "3 SOME DAYS"  
4 = "4 RARELY"  
5 = "5 NOT AT ALL" ;
```

```
VALUE W200048W  
-7 = '-7 RF'  
-8 = '-8 DK'  
-1 = '-1 Inapplicable'  
-9 = '-9 Missing'  
1 = "1 LESS THAN WAS NEEDED"  
2 = "2 MORE THAN WAS NEEDED"  
3 = "3 ABOUT RIGHT AMOUNT" ;
```

```
VALUE W200049W  
-7 = '-7 RF'  
-8 = '-8 DK'  
-1 = '-1 Inapplicable'  
-9 = '-9 Missing'  
1 = "1 YES"  
2 = "2 NO"  
3 = "3 DOES NOT APPLY/NO CARE IN LAST MONTH OF LIFE" ;
```

```
VALUE W200050W  
-7 = '-7 RF'  
-8 = '-8 DK'
```

## SAS ALGORITHM FOR DEMENTIA

```
-1 = '-1 Inapplicable'  
-9 = '-9 Missing'  
1 = "1 ALWAYS"  
2 = "2 USUALLY"  
3 = "3 SOMETIMES"  
4 = "4 NEVER"  
5 = "5 DOES NOT APPLY/NO CARE IN LAST MONTH OF LIFE" ;
```

```
VALUE W200051W
```

```
-7 = '-7 RF'  
-8 = '-8 DK'  
-1 = '-1 Inapplicable'  
-9 = '-9 Missing'  
1 = "1 EXCELLENT"  
2 = "2 VERY GOOD"  
3 = "3 GOOD"  
4 = "4 FAIR"  
5 = "5 POOR" ;
```

```
VALUE W200052W
```

```
-7 = '-7 RF'  
-8 = '-8 DK'  
-1 = '-1 Inapplicable'  
-9 = '-9 Missing'  
1 = "1 NOT AT ALL"  
2 = "2 SEVERAL DAYS"  
3 = "3 MORE THAN HALF THE DAYS"  
4 = "4 NEARLY EVERY DAY" ;
```

```
VALUE W200053W
```

```
-7 = '-7 RF'  
-8 = '-8 DK'  
-1 = '-1 Inapplicable'  
-9 = '-9 Missing'  
1 = "1 EVERY NIGHT (7 NIGHTS A WEEK)"  
2 = "2 MOST NIGHTS (5-6 NIGHTS A WEEK)"  
3 = "3 SOME NIGHTS (2-4 NIGHTS A WEEK)"  
4 = "4 RARELY (ONCE A WEEK OR LESS)"  
5 = "5 NEVER" ;
```

```
VALUE W200054W
```

```
-7 = '-7 RF'  
-8 = '-8 DK'  
-1 = '-1 Inapplicable'  
-9 = '-9 Missing'  
1 = "1 EVERY NIGHT (7 NIGHTS A WEEK)"  
2 = "2 MOST NIGHTS (5-6 NIGHTS A WEEK)"  
3 = "3 SOME NIGHTS (2-4 NIGHTS A WEEK)"  
4 = "4 RARELY (ONCE A WEEK OR LESS)"  
5 = "5 NEVER"  
7 = "7 DON'T WAKE UP/NOT A PROBLEM" ;
```

```
VALUE W200055W
```

```
-7 = '-7 RF'  
-8 = '-8 DK'  
-1 = '-1 Inapplicable'  
-9 = '-9 Missing'
```

## SAS ALGORITHM FOR DEMENTIA

```
1 = "1 PRIVATE RESIDENCE"  
2 = "2 A GROUP HOME, BOARD AND CARE, OR SUPERVISED HOUSING"  
3 = "3 ASSISTED LIVING FACILITY OR CONTINUING CARE RETIREMENT COMMUNITY  
(CCRC) "  
4 = "4 RELIGIOUS GROUP QUARTERS"  
91 = "91 OTHER (SPECIFY)" ;
```

```
VALUE W200056W  
-7 = '-7 RF'  
-8 = '-8 DK'  
-1 = '-1 Inapplicable'  
-9 = '-9 Missing'  
1 = "1 YES"  
2 = "2 NO"  
7 = "7 PLACE DOES NOT HAVE A NAME" ;
```

```
VALUE W200057W  
-7 = '-7 RF'  
-8 = '-8 DK'  
-1 = '-1 Inapplicable'  
-9 = '-9 Missing'  
1 = "1 APARTMENT"  
2 = "2 ROOM"  
3 = "3 UNIT"  
4 = "4 SUITE"  
91 = "91 SOMETHING ELSE (SPECIFY)" ;
```

```
VALUE W200058W  
-7 = '-7 RF'  
-8 = '-8 DK'  
-1 = '-1 Inapplicable'  
-9 = '-9 Missing'  
1 = "1 YES"  
2 = "2 NO, DIFFERENT PERSON"  
3 = "3 NO, NAME MISPELLED" ;
```

```
VALUE W200060W  
-7 = '-7 RF'  
-8 = '-8 DK'  
-1 = '-1 Inapplicable'  
-9 = '-9 Missing'  
1 = "1 PRIVATE RESIDENCE"  
2 = "2 A GROUP HOME, BOARD AND CARE, OR SUPERVISED HOUSING"  
3 = "3 ASSISTED LIVING FACILITY OR CONTINUING CARE RETIREMENT COMMUNITY  
(CCRC) "  
5 = "5 NURSING HOME"  
91 = "91 OTHER (SPECIFY)" ;
```

```
VALUE W200061W  
-7 = '-7 RF'  
-8 = '-8 DK'  
-1 = '-1 Inapplicable'  
-9 = '-9 Missing'  
1 = "1 SEPARATION OR DIVORCE"  
2 = "2 DECEASED"  
3 = "3 MOVED ELSEWHERE"  
5 = "5 LAST INTERVIEW INFORMATION INCORRECT"
```

## SAS ALGORITHM FOR DEMENTIA

```
      8 = "8 OTHER REASON" ;

VALUE W200067W
-7 = '-7 RF'
-8 = '-8 DK'
-1 = '-1 Inapplicable'
-9 = '-9 Missing'
 1 = "1 COMMON OR SHARED ENTRANCE"
 2 = "2 ENTRANCE DIRECTLY INTO HOME" ;

VALUE W200068W
-7 = '-7 RF'
-8 = '-8 DK'
-1 = '-1 Inapplicable'
-9 = '-9 Missing'
 1 = "1"
 2 = "2"
 3 = "3"
 4 = "4+" ;

VALUE W200069W
-7 = '-7 RF'
-8 = '-8 DK'
-1 = '-1 Inapplicable'
-9 = '-9 Missing'
 1 = "1 ALL ITEMS HERE"
 2 = "2 ADDED ONE OR MORE ITEMS" ;

VALUE W200070W
-7 = '-7 RF'
-8 = '-8 DK'
-1 = '-1 Inapplicable'
-9 = '-9 Missing'
 1 = "1 MORE THAN $500"
 2 = "2 LESS THAN $500"
 3 = "3 JUST ABOUT $500" ;

VALUE W200071W
-7 = '-7 RF'
-8 = '-8 DK'
-1 = '-1 Inapplicable'
-9 = '-9 Missing'
 1 = "1 MORE THAN $1,000"
 2 = "2 LESS THAN $1,000"
 3 = "3 JUST ABOUT $1,000" ;

VALUE W200072W
-7 = '-7 RF'
-8 = '-8 DK'
-1 = '-1 Inapplicable'
-9 = '-9 Missing'
 1 = "1 MORE THAN $100"
 2 = "2 LESS THAN $100"
 3 = "3 JUST ABOUT $100" ;

VALUE W200073W
-7 = '-7 RF'
```

## SAS ALGORITHM FOR DEMENTIA

```
-8 = '-8 DK'  
-1 = '-1 Inapplicable'  
-9 = '-9 Missing'  
1 = "1 YES"  
2 = "2 NO"  
7 = "7 YES, DOESNT KNOW HOW TO USE A COMPUTER" ;
```

```
VALUE W200074W
```

```
-7 = '-7 RF'  
-8 = '-8 DK'  
-1 = '-1 Inapplicable'  
-9 = '-9 Missing'  
1 = "1 MOST DAYS"  
2 = "2 SOME DAYS"  
3 = "3 RARELY" ;
```

```
VALUE W200076W
```

```
-7 = '-7 RF'  
-8 = '-8 DK'  
-1 = '-1 Inapplicable'  
-9 = '-9 Missing'  
1 = "1 YES"  
2 = "2 NO"  
7 = "7 DEAF" ;
```

```
VALUE W200077W
```

```
-7 = '-7 RF'  
-8 = '-8 DK'  
-1 = '-1 Inapplicable'  
-9 = '-9 Missing'  
1 = "1 YES"  
2 = "2 NO"  
7 = "7 BLIND" ;
```

```
VALUE W200078W
```

```
-7 = '-7 RF'  
-8 = '-8 DK'  
-1 = '-1 Inapplicable'  
-9 = '-9 Missing'  
1 = "1 EVERY DAY (7 DAYS A WEEK)"  
2 = "2 MOST DAYS (5-6 DAYS A WEEK)"  
3 = "3 SOME DAYS (2-4 DAYS A WEEK)"  
4 = "4 RARELY (ONCE A WEEK OR LESS)"  
5 = "5 NEVER" ;
```

```
VALUE W200080W
```

```
-7 = '-7 RF'  
-8 = '-8 DK'  
-1 = '-1 Inapplicable'  
-9 = '-9 Missing'  
1 = "1 YES, A CHANGE"  
2 = "2 NO, NO CHANGE"  
3 = "3 DEMENTIA/ALZHEIMER'S REPORTED BY PROXY" ;
```

```
VALUE W200081W
```

```
-7 = '-7 RF'  
-8 = '-8 DK'
```

## SAS ALGORITHM FOR DEMENTIA

```
-1 = '-1 Inapplicable'  
-9 = '-9 Missing'  
1 = "1 SP HAS DEMENTIA/ALZHEIMER'S/ NOT ABLE"  
2 = "2 SP IS UNABLE TO SPEAK"  
3 = "3 SP IS UNABLE TO HEAR"  
4 = "4 SP REFUSED"  
5 = "5 PROXY REFUSED"  
6 = "6 SP NOT PRESENT"  
7 = "7 SP TOO ILL"  
8 = "8 SP LANGUAGE BARRIER"  
91 = "91 OTHER (SPECIFY)" ;
```

VALUE W200082W

```
-7 = '-7 RF'  
-8 = '-8 DK'  
-1 = '-1 Inapplicable'  
-9 = '-9 Missing'  
1 = "1 MUCH BETTER"  
2 = "2 BETTER"  
3 = "3 SAME"  
4 = "4 WORSE"  
5 = "5 MUCH WORSE" ;
```

VALUE W200083W

```
-7 = '-7 RF'  
-8 = '-8 DK'  
-1 = '-1 Inapplicable'  
-9 = '-9 Missing'  
1 = "1 YES"  
2 = "2 NO/DON'T KNOW" ;
```

VALUE W200084W

```
-7 = '-7 RF'  
-8 = '-8 DK'  
-1 = '-1 Inapplicable'  
-9 = '-9 Missing'  
1 = "1 CONTINUE WITH ACTIVITY"  
2 = "2 SP REFUSES ACTIVITY" ;
```

VALUE W200085W

```
-1 = '-1 Inapplicable'  
-9 = '-9 Missing'  
1 = "Word[1]"  
2 = "Word[2]"  
3 = "Word[3]"  
4 = "Word[4]"  
5 = "Word[5]"  
6 = "Word[6]"  
7 = "Word[7]"  
8 = "Word[8]"  
9 = "Word[9]"  
10 = "Word[10]"  
91 = "91 NO WORDS REMEMBERED"  
92 = "92 REFUSED" ;
```

VALUE W200086W

```
-7 = '-7 RF'
```

## SAS ALGORITHM FOR DEMENTIA

```
-8 = '-8 DK'  
-1 = '-1 Inapplicable'  
-9 = '-9 Missing'  
1 = "1 DIFFICULTY HEARING ANY OF THE WORDS"  
2 = "2 INTERRUPTION OCCURRED WHILE LIST WAS BEING READ"  
91 = "91 OTHER PROBLEM (SPECIFY)"  
92 = "92 NO PROBLEMS OCCURRED"  
97 = "97 SP REFUSED WORD RECALL TASK" ;
```

VALUE W200087W

```
-1 = '-1 Inapplicable'  
-9 = '-9 Missing'  
1 = "1 SP ATTEMPTED CLOCK DRAWING"  
2 = "2 SP DID NOT ATTEMPT CLOCK DRAWING"  
97 = "3 SP REFUSED CLOCK DRAWING" ;
```

VALUE W200089W

```
-7 = '-7 RF'  
-8 = '-8 DK'  
-1 = '-1 Inapplicable'  
-9 = '-9 Missing'  
1 = "1 EVERY DAY (7 DAYS A WEEK)"  
2 = "2 MOST DAYS (5-6 DAYS A WEEK)"  
3 = "3 SOME DAYS (2-4 DAYS A WEEK)"  
4 = "4 RARELY (ONCE A WEEK OR LESS)"  
5 = "5 NEVER" ;
```

VALUE W200090W

```
-7 = '-7 RF'  
-8 = '-8 DK'  
-1 = '-1 Inapplicable'  
-9 = '-9 Missing'  
1 = "1 EVERY TIME"  
2 = "2 MOST TIMES"  
3 = "3 SOMETIMES"  
4 = "4 RARELY"  
5 = "5 NEVER" ;
```

VALUE W200092W

```
-7 = '-7 RF'  
-8 = '-8 DK'  
-1 = '-1 Inapplicable'  
-9 = '-9 Missing'  
1 = "1 MOST TIMES"  
2 = "2 SOMETIMES"  
3 = "3 RARELY"  
4 = "4 NEVER" ;
```

VALUE W200093W

```
-7 = '-7 RF'  
-8 = '-8 DK'  
-1 = '-1 Inapplicable'  
-9 = '-9 Missing'  
1 = "1 NONE"  
2 = "2 A LITTLE"  
3 = "3 SOME"  
4 = "4 A LOT" ;
```

## SAS ALGORITHM FOR DEMENTIA

```
VALUE W200094W
-7 = '-7 RF'
-8 = '-8 DK'
-1 = '-1 Inapplicable'
-9 = '-9 Missing'
1 = "1 MORE OFTEN"
2 = "2 LESS OFTEN"
3 = "3 ABOUT THE SAME" ;

VALUE W200095W
-7 = '-7 RF'
-8 = '-8 DK'
-1 = '-1 Inapplicable'
-9 = '-9 Missing'
1 = "1 JANUARY"
2 = "2 FEBRUARY"
3 = "3 MARCH"
4 = "4 APRIL"
5 = "5 MAY"
6 = "6 JUNE"
7 = "7 JULY"
8 = "8 AUGUST"
9 = "9 SEPTEMBER"
10 = "10 OCTOBER"
11 = "11 NOVEMBER"
12 = "12 DECEMBER"
90 = "90 LAST INTERVIEW INFORMATION INCORRECT" ;

VALUE W200096W
-7 = '-7 RF'
-8 = '-8 DK'
-1 = '-1 Inapplicable'
-9 = '-9 Missing'
1 = "1 YES"
2 = "2 NO"
90 = "90 LAST INTERVIEW INFORMATION INCORRECT" ;

VALUE W200097W
-7 = '-7 RF'
-8 = '-8 DK'
-1 = '-1 Inapplicable'
-9 = '-9 Missing'
1 = "1 YES"
2 = "2 NO / NO LONGER DRIVE" ;

VALUE W200098W
-7 = '-7 RF'
-8 = '-8 DK'
-1 = '-1 Inapplicable'
-9 = '-9 Missing'
1 = "1 YES"
2 = "2 NO"
7 = "7 NO, NO RAIN OR BAD WEATHER" ;

VALUE W200099W
-7 = '-7 RF'
```



## SAS ALGORITHM FOR DEMENTIA

```
-8 = '-8 DK'  
-1 = '-1 Inapplicable'  
-9 = '-9 Missing'  
1 = "1 ALWAYS DID IT BY SELF"  
2 = "2 ALWAYS DID IT TOGETHER WITH SOMEONE ELSE"  
3 = "3 SOMEONE ELSE ALWAYS DID IT"  
4 = "4 IT VARIED (MORE THAN ONE WAY)"  
5 = "5 NOT DONE IN LAST MONTH" ;
```

VALUE W200102W

```
-7 = '-7 RF'  
-8 = '-8 DK'  
-1 = '-1 Inapplicable'  
-9 = '-9 Missing'  
1 = "1 MORE OFTEN"  
2 = "2 LESS OFTEN"  
3 = "3 SAME" ;
```

VALUE W200106W

```
-7 = '-7 RF'  
-8 = '-8 DK'  
-1 = '-1 Inapplicable'  
-9 = '-9 Missing'  
1 = "1 YES"  
2 = "2 NO"  
7 = "7 ALWAYS FED THROUGH IV OR TUBE" ;
```

VALUE W200107W

```
-7 = '-7 RF'  
-8 = '-8 DK'  
-1 = '-1 Inapplicable'  
-9 = '-9 Missing'  
1 = "1 EVERY TIME"  
2 = "2 MOST TIMES"  
3 = "3 SOMETIMES"  
4 = "4 RARELY" ;
```

VALUE W200109W

```
-7 = '-7 RF'  
-8 = '-8 DK'  
-1 = '-1 Inapplicable'  
-9 = '-9 Missing'  
1 = "1 SHOWERING"  
2 = "2 TAKING BATHS"  
3 = "3 WASHING UP SOME OTHER WAY" ;
```

VALUE W200114W

```
-7 = '-7 RF'  
-8 = '-8 DK'  
-1 = '-1 Inapplicable'  
-9 = '-9 Missing'  
1 = "1 VERY IMPORTANT"  
2 = "2 SOMEWHAT IMPORTANT"  
3 = "3 NOT SO IMPORTANT" ;
```

VALUE W200115W

## SAS ALGORITHM FOR DEMENTIA

```
-7 = '-7 RF'  
-8 = '-8 DK'  
-1 = '-1 Inapplicable'  
-9 = '-9 Missing'  
1 = "1 YES"  
2 = "2 NO"  
95 = "95 NO ACTIVITY LISTED" ;
```

```
VALUE W200116W
```

```
-7 = '-7 RF'  
-8 = '-8 DK'  
-1 = '-1 Inapplicable'  
-9 = '-9 Missing'  
1 = "1 LEFT"  
2 = "2 RIGHT"  
3 = "3 BOTH" ;
```

```
VALUE W200117W
```

```
-7 = '-7 RF'  
-8 = '-8 DK'  
-1 = '-1 Inapplicable'  
-9 = '-9 Missing'  
1 = "1 LEFT SIDE"  
2 = "2 RIGHT SIDE"  
3 = "3 BOTH SIDES" ;
```

```
VALUE W200118W
```

```
-7 = '-7 RF'  
-8 = '-8 DK'  
-1 = '-1 Inapplicable'  
-9 = '-9 Missing'  
1 = "1 ONE SIDE"  
2 = "2 BOTH SIDES" ;
```

```
VALUE W200119W
```

```
-7 = '-7 RF'  
-8 = '-8 DK'  
-1 = '-1 Inapplicable'  
-9 = '-9 Missing'  
1 = "1 RECEIVE ALL TREATMENTS"  
2 = "2 STOP/REJECT ALL TREATMENTS" ;
```

```
VALUE W200120W
```

```
-7 = '-7 RF'  
-8 = '-8 DK'  
-1 = '-1 Inapplicable'  
-9 = '-9 Missing'  
1 = "1 LIVING IN THEIR OWN HOME WITH HELP FROM FRIENDS AND FAMILY"  
2 = "2 LIVING IN THEIR OWN HOME WITH HELP FROM SOMEONE PAID TO COME IN"  
3 = "3 LIVING WITH AN ADULT CHILD"  
4 = "4 LIVING IN AN ASSISTED LIVING FACILITY OR CONTINUING CARE  
RESIDENCE"  
5 = "5 LIVING IN A NURSING HOME" ;
```

```
VALUE W200121W
```

```
-7 = '-7 RF'  
-8 = '-8 DK'
```

## SAS ALGORITHM FOR DEMENTIA

```
-1 = '-1 Inapplicable'  
-9 = '-9 Missing'  
1 = "1 YES"  
2 = "2 NO"  
3 = "3 DOESNT HAVE ANY MONEY TO PAY A CAREGIVER"  
4 = "4 WOULD NOT USE A PAID CAREGIVER" ;
```

VALUE W200122W

```
-7 = '-7 RF'  
-8 = '-8 DK'  
-1 = '-1 Inapplicable'  
-9 = '-9 Missing'  
1 = "1 MAKE DECISIONS WITHOUT MUCH ADVICE FROM THEM"  
2 = "2 GET THEIR ADVICE AND THEN MAKE DECISIONS"  
3 = "3 MAKE DECISIONS TOGETHER"  
4 = "4 LEAVE DECISIONS UP TO THEM" ;
```

VALUE W200123W

```
-7 = '-7 RF'  
-8 = '-8 DK'  
-1 = '-1 Inapplicable'  
-9 = '-9 Missing'  
1 = "1 HANDLE MOSTLY BY SELF"  
2 = "2 HANDLE TOGETHER WITH FAMILY OR CLOSE FRIENDS"  
3 = "3 FAMILY OR CLOSE FRIENDS MOSTLY HANDLE THESE THINGS"  
4 = "4 IT VARIES" ;
```

VALUE W200124W

```
-7 = '-7 RF'  
-8 = '-8 DK'  
-1 = '-1 Inapplicable'  
-9 = '-9 Missing'  
1 = "1 NEVER"  
2 = "2 RARELY"  
3 = "3 SOMETIMES"  
4 = "4 OFTEN" ;
```

VALUE W200126W

```
-7 = '-7 RF'  
-8 = '-8 DK'  
-1 = '-1 Inapplicable'  
-9 = '-9 Missing'  
1 = "1 AGREE A LOT"  
2 = "2 AGREE A LITTLE"  
3 = "3 DO NOT AGREE" ;
```

VALUE W200127W

```
-7 = '-7 RF'  
-8 = '-8 DK'  
-1 = '-1 Inapplicable'  
-9 = '-9 Missing'  
1 = "1 AGREE A LOT"  
2 = "2 AGREE A LITTLE"  
3 = "3 AGREE NOT AT ALL" ;
```

VALUE W200129W

```
-7 = '-7 RF'
```

## SAS ALGORITHM FOR DEMENTIA

```
-8 = '-8 DK'  
-1 = '-1 Inapplicable'  
-9 = '-9 Missing'  
1 = "1 less than $1,000,"  
2 = "2 $1,000 to less than $2,000,"  
3 = "3 $2,000 to less than $3,000,"  
4 = "4 $3,000 to less than $5,000, or"  
5 = "5 $5,000 or more?" ;
```

VALUE W200131W

```
-7 = '-7 RF'  
-8 = '-8 DK'  
-1 = '-1 Inapplicable'  
-9 = '-9 Missing'  
1 = "1 YES"  
2 = "2 NO"  
3 = "3 RETIRED/DON'T WORK ANYMORE" ;
```

VALUE W200132W

```
-7 = '-7 RF'  
-8 = '-8 DK'  
-1 = '-1 Inapplicable'  
-9 = '-9 Missing'  
1 = "1 EVERY WEEK"  
2 = "2 EVERY TWO WEEKS"  
3 = "3 TWO TIMES A MONTH"  
4 = "4 ONCE A MONTH"  
5 = "5 DAILY"  
91 = "91 OTHER SCHEDULE (SPECIFY)" ;
```

VALUE W200133W

```
-7 = '-7 RF'  
-8 = '-8 DK'  
-1 = '-1 Inapplicable'  
-9 = '-9 Missing'  
1 = "1 OWN"  
2 = "2 RENT"  
3 = "3 SOME OTHER ARRANGEMENT" ;
```

VALUE W200134W

```
-7 = '-7 RF'  
-8 = '-8 DK'  
-1 = '-1 Inapplicable'  
-9 = '-9 Missing'  
1 = "1 PAID OFF"  
2 = "2 STILL MAKE PAYMENTS"  
3 = "3 REVERSE MORTGAGE" ;
```

VALUE W200135W

```
-7 = '-7 RF'  
-8 = '-8 DK'  
-1 = '-1 Inapplicable'  
-9 = '-9 Missing'  
1 = "1 less than $250,"  
2 = "2 $250-$499,"  
3 = "3 $500-$999, or"  
4 = "4 $1,000 or more?" ;
```

## SAS ALGORITHM FOR DEMENTIA

VALUE W200136W

-7 = '-7 RF'  
-8 = '-8 DK'  
-1 = '-1 Inapplicable'  
-9 = '-9 Missing'  
1 = "1 5 YEARS"  
2 = "2 10 YEARS"  
3 = "3 LONGER THAN 10 YEARS" ;

VALUE W200137W

-7 = '-7 RF'  
-8 = '-8 DK'  
-1 = '-1 Inapplicable'  
-9 = '-9 Missing'  
1 = "1 less than \$50,000,"  
2 = "2 between \$50,000 and \$100,000, or"  
3 = "3 over \$100,000?" ;

VALUE W200138W

-7 = '-7 RF'  
-8 = '-8 DK'  
-1 = '-1 Inapplicable'  
-9 = '-9 Missing'  
1 = "1 less than \$50,000,"  
2 = "2 \$50,000-\$74,999,"  
3 = "3 \$75,000-\$99,999,"  
4 = "4 \$100,000-\$199,999,"  
5 = "5 \$200,000-\$299,999,"  
6 = "6 \$300,000-\$499,999,"  
7 = "7 \$500,000-\$749,999, or"  
8 = "8 \$750,000 or more?" ;

VALUE W200139W

-7 = '-7 RF'  
-8 = '-8 DK'  
-1 = '-1 Inapplicable'  
-9 = '-9 Missing'  
1 = "1 PAY OFF BALANCE"  
2 = "2 PAY MINIMUM"  
3 = "3 PAY MORE THAN MINIMUM, BUT NOT ENTIRE BALANCE"  
4 = "4 DON'T HAVE ANY CREDIT CARDS" ;

VALUE W200140W

-7 = '-7 RF'  
-8 = '-8 DK'  
-1 = '-1 Inapplicable'  
-9 = '-9 Missing'  
1 = "1 less than \$1,000,"  
2 = "2 \$1,000 - \$1,999,"  
3 = "3 \$2,000 - \$3,999,"  
4 = "4 \$4,000 - \$5,999,"  
5 = "5 \$6,000 - \$9,999,"  
6 = "6 \$10,000 - \$19,999, or"  
7 = "7 \$20,000 or more?" ;

VALUE W200141W

## SAS ALGORITHM FOR DEMENTIA

```
-7 = '-7 RF'  
-8 = '-8 DK'  
-1 = '-1 Inapplicable'  
-9 = '-9 Missing'  
1 = "1 MOST"  
2 = "2 SOME"  
3 = "3 A LITTLE" ;
```

VALUE W200142W

```
-7 = '-7 RF'  
-8 = '-8 DK'  
-1 = '-1 Inapplicable'  
-9 = '-9 Missing'  
1 = "1 less than $500,"  
2 = "2 $500 - $999,"  
3 = "3 $1,000 - $1,999,"  
4 = "4 $2,000 - $3,999,"  
5 = "5 $4,000 - $5,999,"  
6 = "6 $6,000 - $9,999,"  
7 = "7 $10,000 - $19,999, or"  
8 = "8 $20,000 or more?" ;
```

VALUE W200146W

```
-7 = '-7 RF'  
-8 = '-8 DK'  
-1 = '-1 Inapplicable'  
-9 = '-9 Missing'  
1 = "1 NEARLY EVERY DAY"  
2 = "2 MORE THAN HALF THE DAYS"  
3 = "3 SEVERAL DAYS (LESS THAN HALF)"  
4 = "4 A FEW DAYS" ;
```

VALUE W200147W

```
-7 = '-7 RF'  
-8 = '-8 DK'  
-1 = '-1 Inapplicable'  
-9 = '-9 Missing'  
1 = "1 INCLUDED"  
2 = "2 EXTRA CHARGE" ;
```

VALUE W200148W

```
-7 = '-7 RF'  
-8 = '-8 DK'  
-1 = '-1 Inapplicable'  
-9 = '-9 Missing'  
1 = "1 Yes" ;
```

VALUE F200006W

```
-7 = '-7 RF'  
-8 = '-8 DK'  
-1 = '-1 Inapplicable'  
-9 = '-9 Missing'  
1 = "1 FREE STANDING NURSING HOME"  
2 = "2 FREE STANDING ASSISTED LIVING FACILITY"  
3 = "3 NURSING HOME AND ASSISTED LIVING FACILITY"  
4 = "4 CONTINUING CARE RETIREMENT COMMUNITY (CCRC)"  
5 = "5 ADULT FAMILY CARE HOME"
```

## SAS ALGORITHM FOR DEMENTIA

```
6 = "6 GROUP HOME"  
7 = "7 BOARD AND CARE HOME"  
8 = "8 RETIREMENT COMMUNITY OR SENIOR HOUSING (NOT CCRC)"  
91 = "91 OTHER (SPECIFY)" ;
```

```
VALUE F200007W  
-7 = '-7 RF'  
-8 = '-8 DK'  
-1 = '-1 Inapplicable'  
-9 = '-9 Missing'  
1 = "1 YES"  
2 = "2 NO" ;
```

```
VALUE F200008W  
-7 = '-7 RF'  
-8 = '-8 DK'  
-1 = '-1 Inapplicable'  
-9 = '-9 Missing'  
1 = "1 INDEPENDENT LIVING"  
2 = "2 ASSISTED LIVING"  
3 = "3 SPECIAL CARE, MEMORY CARE, OR ALZHEIMER'S UNIT"  
4 = "4 NURSING HOME"  
91 = "91 OTHER (SPECIFY)" ;
```

```
VALUE F200009W  
-7 = '-7 RF'  
-8 = '-8 DK'  
-1 = '-1 Inapplicable'  
-9 = '-9 Missing'  
1 = "1 ASSISTED LIVING"  
2 = "2 NURSING HOME" ;
```

```
VALUE F200011W  
-7 = '-7 RF'  
-8 = '-8 DK'  
-1 = '-1 Inapplicable'  
-9 = '-9 Missing'  
1 = "1 YES, SERVICE PROVIDED AS PART OF PACKAGE"  
2 = "2 YES, SERVICE PROVIDED AT AN EXTRA CHARGE"  
3 = "3 NO, SERVICE NOT PROVIDED" ;
```

```
VALUE F200012W  
-7 = '-7 RF'  
-8 = '-8 DK'  
-1 = '-1 Inapplicable'  
-9 = '-9 Missing'  
1 = "1 SP/FAMILY"  
2 = "2 SOCIAL SECURITY/SSI"  
3 = "3 MEDICAID"  
4 = "4 MEDICARE"  
5 = "5 OTHER SOURCE" ;
```

```
VALUE I200002W  
-7 = '-7 RF'  
-8 = '-8 DK'  
-1 = '-1 Inapplicable'  
-9 = '-9 Missing'
```

## SAS ALGORITHM FOR DEMENTIA

```
1 = "1 Yes"
2 = "2 No" ;

VALUE I200003W
-7 = '-7 RF'
-8 = '-8 DK'
-1 = '-1 Inapplicable'
-9 = '-9 Missing'
1 = "1 English"
2 = "2 Spanish"
3 = "3 Other (specify)" ;

VALUE I200005W
-7 = '-7 RF'
-8 = '-8 DK'
-1 = '-1 Inapplicable'
-9 = '-9 Missing'
1 = "1 Friendly and interested"
2 = "2 Cooperative but not particularly interested"
3 = "3 Impatient and restless"
4 = "4 Hostile" ;

VALUE I200006W
-7 = '-7 RF'
-8 = '-8 DK'
-1 = '-1 Inapplicable'
-9 = '-9 Missing'
1 = "1 Good"
2 = "2 Fair"
3 = "3 Poor" ;

VALUE I200008W
-7 = '-7 RF'
-8 = '-8 DK'
-1 = '-1 Inapplicable'
-9 = '-9 Missing'
1 = "1 All of the time"
2 = "2 Most of the time"
3 = "3 Some of the time"
4 = "4 Only for the cognition and/or performance parts"
5 = "5 None of the time" ;

VALUE I200010W
-7 = '-7 RF'
-8 = '-8 DK'
-1 = '-1 Inapplicable'
-9 = '-9 Missing'
1 = "1 Yes"
2 = "2 No"
3 = "3 Interview was conducted by telephone" ;

VALUE I200012W
-7 = '-7 RF'
-8 = '-8 DK'
-1 = '-1 Inapplicable'
-9 = '-9 Missing'
1 = "1 Yes"
```



## SAS ALGORITHM FOR DEMENTIA

```
2 = "2 No"  
3 = "3 Not Administered" ;
```

```
VALUE I200013W
```

```
-7 = '-7 RF'  
-8 = '-8 DK'  
-1 = '-1 Inapplicable'  
-9 = '-9 Missing'  
1 = "1 Yes"  
2 = "2 No" ;
```

```
VALUE I200016W
```

```
-7 = '-7 RF'  
-8 = '-8 DK'  
-1 = '-1 Inapplicable'  
-9 = '-9 Missing'  
1 = "1 Yes"  
2 = "2 No"  
3 = "3 Entire interview conducted by telephone" ;
```

```
VALUE I200017W
```

```
-7 = '-7 RF'  
-8 = '-8 DK'  
-1 = '-1 Inapplicable'  
-9 = '-9 Missing'  
1 = "1 Not at all cluttered"  
2 = "2 Somewhat cluttered"  
3 = "3 Very cluttered"  
4 = "4 Could not see other rooms" ;
```

```
VALUE I200018W
```

```
-7 = '-7 RF'  
-8 = '-8 DK'  
-1 = '-1 Inapplicable'  
-9 = '-9 Missing'  
1 = "1 None"  
2 = "2 A little"  
3 = "3 Some"  
4 = "4 A lot"  
5 = "5 Could not observe" ;
```

```
VALUE I200019W
```

```
-7 = '-7 RF'  
-8 = '-8 DK'  
-1 = '-1 Inapplicable'  
-9 = '-9 Missing'  
1 = "1 Yes"  
2 = "2 No"  
7 = "7 Could not observe" ;
```

```
/* DERIVED VARIABLE FORMATS */
```

```
VALUE LVGARRG
```

```
1 = '1 Alone'  
2 = '2 With spouse/partner only (spouse/partner in household)'  
3 = '3 With spouse/partner and with others'  
4 = '4 With others only'
```

## SAS ALGORITHM FOR DEMENTIA

```
-1 = '-1 Inapplicable'  
-9 = '-9 Missing';
```

### VALUE DOUTSFDF

```
8 = '8 Not done in last month'  
1 = '1 Did not do by self in last month'  
2 = '2 Did by self in last month/No Difficulty'  
3 = '3 Did by self in last month/Difficulty'  
4 = '4 DKRF Did by self in last month/No Difficulty'  
5 = '5 DKRF Did by self in last month/Difficulty'  
6 = '6 Did by self in last month/DKRF Difficulty'  
7 = '7 DKRF Did by self in last month/DKRF Difficulty'  
-1 = '-1 Inapplicable'  
-9 = '-9 Missing';
```

### VALUE DOUTDEVI

```
8 = '8 Not done in last month'  
1 = '1 No use of devices to go outside in last month'  
2 = '2 Use of devices to go outside in last month'  
3 = '3 DKRF If used devices to go outside in last month'  
4 = '4 DKRF If used devices in last month'  
-1 = '-1 Inapplicable'  
-9 = '-9 Missing';
```

### VALUE DOUTHELP

```
8 = '8 Not done in last month'  
1 = '1 No help to go outside in last month'  
2 = '2 Had help to go outside in last month'  
3 = '3 DKRF If had help to go outside in last month'  
-1 = '-1 Inapplicable'  
-9 = '-9 Missing';
```

### VALUE DINSDFSDF

```
8 = '8 Not done in last month'  
1 = '1 Did not do by self in last month'  
2 = '2 Did by self in last month/No Difficulty'  
3 = '3 Did by self in last month/Difficulty'  
4 = '4 DKRF Did by self in last month/No Difficulty'  
5 = '5 DKRF Did by self in last month/Difficulty'  
6 = '6 Did by self in last month/DKRF Difficulty'  
7 = '7 DKRF Did by self in last month/DKRF Difficulty'  
-1 = '-1 Inapplicable'  
-9 = '-9 Missing';
```

### VALUE DINSDDDEV

```
8 = '8 Not done in last month'  
1 = '1 No use of devices inside in last month'  
2 = '2 Use of devices inside in last month'  
3 = '3 DKRF If used devices inside in last month'  
4 = '4 DKRF On use of devices'  
-1 = '-1 Inapplicable'  
-9 = '-9 Missing';
```

### VALUE dinsdhlp

```
8 = '8 Not done in last month'  
1 = '1 No help to go around inside in last month'  
2 = '2 Had help to go around inside in last month'
```

## SAS ALGORITHM FOR DEMENTIA

```
3 = '3 DKRF If had help to go around inside in last month'  
-1 = '-1 Inapplicable'  
-9 = '-9 Missing';
```

### VALUE dbedsfd

```
1 = '1 Did not do by self in last month'  
2 = '2 Did by self in last month/No Difficulty'  
3 = '3 Did by self in last month/Difficulty'  
4 = '4 DKRF Did by self in last month/No Difficulty'  
5 = '5 DKRF Did by self in last month/Difficulty'  
6 = '6 Did by self in last month/DKRF Difficulty'  
7 = '7 DKRF Did by self in last month/DKRF Difficulty'  
-1 = '-1 Inapplicable'  
-9 = '-9 Missing';
```

### VALUE dbeddevi

```
1 = '1 No use of cane or walker to get out of bed in last month'  
2 = '2 Use of cane or walker to get out of bed in last month'  
3 = '3 DKRF If Used cane or walker to get out of bed in last month'  
4 = '4 DKRF If used cane or walker in last month'  
-1 = '-1 Inapplicable'  
-9 = '-9 Missing';
```

### VALUE dbedhelp

```
1 = '1 No help to get out of bed in last month'  
2 = '2 Had help to get out of bed in last month'  
3 = '3 DKRF If had help to get out of bed in last month'  
-1 = '-1 Inapplicable'  
-9 = '-9 Missing';
```

### VALUE dlaunsfd

```
1 = '1 Did not do by self in last month'  
2 = '2 Did by self in last month/No Difficulty'  
3 = '3 Did by self in last month/Difficulty'  
4 = '4 DKRF Did by self in last month/No Difficulty'  
5 = '5 DKRF Did by self in last month/Difficulty'  
6 = '6 Did by self in last month/DKRF Difficulty'  
7 = '7 DKRF Did by self in last month/DKRF Difficulty'  
8 = '8 Not done in last month'  
-1 = '-1 Inapplicable'  
-9 = '-9 Missing';
```

### VALUE dlaunrea

```
1= '1 Health/functioning reason only'  
2= '2 Other reason only'  
3= '3 Both health/functioning and other'  
4= '4 Service/someone from the place SP lives'  
-7 = '-7 RF'  
-8 = '-8 DK'  
-1 = '-1 Inapplicable'  
-9 = '-9 Missing';
```

### VALUE dshopsfd

```
1 = '1 Did not do by self in last month'
```

## SAS ALGORITHM FOR DEMENTIA

```
2 = '2 Did by self in last month/No Difficulty'  
3 = '3 Did by self in last month/Difficulty'  
4 = '4 DKRF Did by self in last month/No Difficulty'  
5 = '5 DKRF Did by self in last month/Difficulty'  
6 = '6 Did by self in last month/DKRF Difficulty'  
7 = '7 DKRF Did by self in last month/DKRF Difficulty'  
8 = '8 Not done in last month'  
-1 = '-1 Inapplicable'  
-9 = '-9 Missing';
```

### VALUE dshoprea

```
1= '1 Health/functioning reason only'  
2= '2 Other reason only'  
3= '3 Both health/functioning and other'  
4= '4 Service/someone from the place SP lives'  
-7 = '-7 RF'  
-8 = '-8 DK'  
-1 = '-1 Inapplicable'  
-9 = '-9 Missing';
```

### VALUE dmealsfd

```
1 = '1 Did not do by self in last month'  
2 = '2 Did by self in last month/No Difficulty'  
3 = '3 Did by self in last month/Difficulty'  
4 = '4 DKRF Did by self in last month/No Difficulty'  
5 = '5 DKRF Did by self in last month/Difficulty'  
6 = '6 Did by self in last month/DKRF Difficulty'  
7 = '7 DKRF Did by self in last month/DKRF Difficulty'  
8 = '8 Not done in last month'  
-1 = '-1 Inapplicable'  
-9 = '-9 Missing';
```

### VALUE dmealrea

```
1= '1 Health/functioning reason only'  
2= '2 Other reason only'  
3= '3 Both health/functioning and other'  
4= '4 Service/someone from the place SP lives'  
-7 = '-7 RF'  
-8 = '-8 DK'  
-1 = '-1 Inapplicable'  
-9 = '-9 Missing';
```

### VALUE dbanksfd

```
1 = '1 Did not do by self in last month'  
2 = '2 Did by self in last month/No Difficulty'  
3 = '3 Did by self in last month/Difficulty'  
4 = '4 DKRF Did by self in last month/No Difficulty'  
5 = '5 DKRF Did by self in last month/Difficulty'  
6 = '6 Did by self in last month/DKRF Difficulty'  
7 = '7 DKRF Did by self in last month/DKRF Difficulty'  
8 = '8 Not done in last month'  
-7 = '-7 RF'  
-8 = '-8 DK'  
-1 = '-1 Inapplicable'  
-9 = '-9 Missing';
```

### VALUE dbankrea

## SAS ALGORITHM FOR DEMENTIA

```
1= '1 Health/functioning reason only'  
2= '2 Other reason only'  
3= '3 Both health/functioning and other'  
4= '4 Service/someone from the place SP lives'  
-7 = '-7 RF'  
-8 = '-8 DK'  
-1 = '-1 Inapplicable'  
-9 = '-9 Missing';
```

```
VALUE deatdevi  
1 = '1 No use of adapted utensils in last month'  
2 = '2 Use of adapted utensils in last month'  
8 = '8 Not done in last month'  
3 = '3 DKRF If used adapted utensils in last month'  
-1 = '-1 Inapplicable'  
-9 = '-9 Missing';
```

```
VALUE deathelp  
1 = '1 No help eating in last month'  
2 = '2 Had help eating in last month'  
3 = '3 DKRF If had help eating in last month'  
8 = '8 Not done in last month'  
-1 = '-1 Inapplicable'  
-9 = '-9 Missing';
```

```
VALUE deatsfdf  
1 = '1 Did not do by self in last month'  
2 = '2 No Difficulty by self (and when using utensils)'  
3 = '3 Difficulty by self (and when using utensils)'  
6 = '6 Did by self in last month/DKRF Difficulty'  
7 = '7 DKRF Did by self in last month/DKRF Difficulty'  
8 = '8 Not done in last month'  
-1 = '-1 Inapplicable'  
-9 = '-9 Missing';
```

```
VALUE dbathdev  
1 = '1 No use of grab bars or bath seats in last month'  
2 = '2 Use of grab bars or bath seats in last month'  
3 = '3 DKRF If use of grab bars or bath seats in last month'  
4 = '4 DKRF If had grab bars or bath seats in last month'  
9 = '9 No bars/seats/shower/tub or washes up other way'  
-1 = '-1 Inapplicable'  
-9 = '-9 Missing';
```

```
VALUE dbathhel  
1 = '1 No help bathing in last month'  
2 = '2 Had help bathing in last month'  
3 = '3 DKRF If had help bathing in last month'  
-1 = '-1 Inapplicable'  
-9 = '-9 Missing';
```

```
VALUE dbathsfd  
1 = '1 Did not do by self in last month'  
2 = '2 No Difficulty by self (and when using grab bars or tub seat)'  
3 = '3 Difficulty by self (and when using grab bars or tub seat)'  
6 = '6 Did by self in last month/DKRF Difficulty'  
7 = '7 DKRF Did by self in last month/DKRF Difficulty'
```

## SAS ALGORITHM FOR DEMENTIA

```
-1 = '-1 Inapplicable'  
-9 = '-9 Missing';
```

### VALUE dtoildev

```
1 = '1 No use of toileting devices in last month'  
2 = '2 Use of toileting devices in last month'  
3 = '3 DKRF of some and no use of other toileting devices in last month'  
-1 = '-1 Inapplicable'  
-9 = '-9 Missing';
```

### VALUE dtoilhel

```
1 = '1 No help toileting in last month'  
2 = '2 Had help toileting in last month'  
3 = '3 DKRF If had help toileting in last month'  
-1 = '-1 Inapplicable'  
-9 = '-9 Missing';
```

### VALUE dtoilsfd

```
1 = '1 Did not do by self in last month'  
2 = '2 No Difficulty by self (and when using toileting devices)'  
3 = '3 Difficulty by self (and when using toileting devices)'  
6 = '6 Did by self in last month/DKRF Difficulty'  
7 = '7 DKRF Did by self in last month/DKRF Difficulty'  
-1 = '-1 Inapplicable'  
-9 = '-9 Missing';
```

### VALUE ddresdev

```
8 = '8 Not done in last month'  
9 = '9 DKRF If dressed in last month'  
2 = '2 Use of dressing devices in last month'  
1 = '1 No use of dressing devices in last month'  
3 = '3 DKRF If use of dressing devices in last month'  
-1 = '-1 Inapplicable'  
-9 = '-9 Missing';
```

### VALUE ddreshel

```
8 = '8 Not done in last month'  
9 = '9 DKRF If dressed in last month'  
1 = '1 No help dressing in last month'  
2 = '2 Had help dressing in last month'  
3 = '3 DKRF If had help dressing in last month'  
-1 = '-1 Inapplicable'  
-9 = '-9 Missing';
```

### VALUE ddressfd

```
1 = '1 Did not do by self in last month'  
2 = '2 No Difficulty by self (and when using dressing devices)'  
3 = '3 Difficulty by self (and when using dressing devices)'  
6 = '6 Did by self in last month/DKRF Difficulty'  
7 = '7 DKRF Did by self in last month/DKRF Difficulty'  
8 = '8 Not done in last month'  
-1 = '-1 Inapplicable'  
-9 = '-9 Missing';
```

### VALUE dmedssfd

```
1 = '1 Did not do by self in last month'  
2 = '2 Did by self in last month/No Difficulty'  
3 = '3 Did by self in last month/Difficulty'
```

## SAS ALGORITHM FOR DEMENTIA

```
4 = '4 DKRF Did by self in last month/No Difficulty'  
5 = '5 DKRF Did by self in last month/Difficulty'  
6 = '6 Did by self in last month/DKRF Difficulty'  
7 = '7 DKRF Did by self in last month/DKRF Difficulty'  
8 = '8 Not done in last month'  
9 = '9 No or DKRF if medications taken in last month'  
-1 = '-1 Inapplicable'  
-9 = '-9 Missing';
```

### VALUE dmedsrea

```
1 = '1 HEALTH/FUNCTIONING REASON ONLY'  
2 = '2 OTHER REASON ONLY'  
3 = '3 BOTH HEALTH/FUNCTIONING AND OTHER'  
4 = '4 SERVICE/SOMEONE FROM THE PLACE SP LIVES'  
-7 = '-7 RF'  
-8 = '-8 DK'  
-1 = '-1 Inapplicable'  
-9 = '-9 Missing';
```

### VALUE dmarstat

```
1 = '1 Married'  
2 = '2 Living with a partner'  
3 = '3 Separated'  
4 = '4 Divorced'  
5 = '5 Widowed'  
6 = '6 Never married'  
-7 = '-7 RF'  
-8 = '-8 DK'  
-1 = '-1 Inapplicable'  
-9 = '-9 Missing';
```

### VALUE DSPSAGEC

```
-7 = '-7 RF'  
-8 = '-8 DK'  
-1 = '-1 Inapplicable'  
-9 = '-9 Missing'  
1 = " 1 UNDER 50"  
2 = " 2 50-54"  
3 = " 3 55-59"  
4 = " 4 60-64"  
5 = " 5 65-69"  
6 = " 6 70-74"  
7 = " 7 75-79"  
8 = " 8 80-84"  
9 = " 9 85-89"  
10 = "10 90 +" ;
```

### VALUE f\_dresid

```
1 = '1 Community '  
2 = '2 Residential care not nursing home (SP interview)'  
3 = '3 Residential care not nursing home (FQ only)'  
4 = '4 Nursing home (SP interview)'  
5 = '5 Nursing home (FQ only)'  
6 = '6 Deceased'  
7 = '7 Residential care not nursing home in R1 and R2 (FQ only)'  
8 = '8 Nursing home in R1 and R2 (FQ only)';
```

### VALUE f3dresid

```
-1='-1 Inapplicable'
```

## SAS ALGORITHM FOR DEMENTIA

```
    1 = '1 Community '  
    2 = '2 Residential care not nursing home (SP interview) '  
    3 = '3 Residential care not nursing home (FQ only) '  
    4 = '4 Nursing home (SP interview) '  
    5 = '5 Nursing home (FQ only) '  
    6 = '6 Deceased '  
    7 = '7 Residential care not nursing home in R1 and R3 (FQ only) '  
    8 = '8 Nursing home in R1 and R3 (FQ only) ' ;  
  
VALUE QUARTILE  
-9="-9 Missing"  
-1="-1 Inapplicable";  
  
VALUE SPPB  
-9="-9 Missing"  
-1="-1 Inapplicable";  
VALUE SPPB_MIS  
-9="-9 Missing"  
-1="-1 Inapplicable"  
1="1 PROXY INTERVIEW"  
2="2 MISSING WALK AND REPEAT CHAIR AND BALANCE"  
3="3 MISSING WALK AND REPEAT CHAIR"  
4="4 MISSING WALK AND BALANCE"  
5="5 MISSING REPEAT CHAIR AND BALANCE"  
6="6 MISSING WALK"  
7="7 MISSING REPEAT CHAIR"  
8="8 MISSING BALANCE"  
9="9 NO SPACE"  
10="10 NO CHAIR"  
11="11 NO SPACE WALK AND NO CHAIR"  
12="12 NO SPACE WALK AND NON-SAFETY MISSING"  
13="13 NO CHAIR AND NON-SAFETY MISSING"  
14="14 NON-SAFETY WALK"  
15="15 NON-SAFETY CHAIR"  
16="16 NON-SAFETY BALANCE"  
17="17 NON-SAFETY WALK AND CHAIR"  
18="18 NON-SAFETY WALK AND BALANCE"  
19="19 NON-SAFETY CHAIR AND BALANCE"  
20="20 NON SAFETY WALK AND CHAIR AND BALANCE";  
  
VALUE DCLCKSC  
0 = '0 Not recognizable as a clock '  
1 = '1 Severely distorted depiction of a clock '  
2 = '2 Moderately distorted depiction of a clock '  
3 = '3 Mildly distorted depiction of a clock '  
4 = '4 Reasonably accurate depiction of a clock '  
5 = '5 Accurate depiction of a clock (circular or square) '  
-7 = '-7 SP refused to draw clock '  
-8 = '-8 DK '  
-1 = '-1 Inapplicable '  
-2 = '-2 Proxy says cannot ask SP '  
-3 = '-3 Proxy says can ask SP but SP unable to answer '  
-4 = '-4 SP did not attempt to draw clock '  
-9 = '-9 Missing';  
  
VALUE DCLCKCL  
1 = '1 Very clear '
```



## SAS ALGORITHM FOR DEMENTIA

```
2 = '2 Somewhat clear'  
3 = '3 Somewhat unclear'  
4 = '4 Very unclear'  
5 = '5 Blank'  
-7 = '-7 SP refused to draw clock'  
-8 = '-8 DK'  
-1 = '-1 Inapplicable'  
-2 = '-2 Proxy says cannot ask SP'  
-3 = '-3 Proxy says can ask SP but SP unable to answer'  
-4 = '-4 SP did not attempt to draw clock'  
-9 = '-9 Missing';
```

### VALUE RESULT

```
-9='-9: MISSING'  
1='1: COMPLETED W RESULTS'  
2='2: COMPLETED MISSING RESULTS'  
3='3: ATTEMPTED W RESULTS'  
4='4: ATTEMPTED MISSING RESULTS'  
5='5: NOT ATTEMPTED SAFETY'  
6='6: NOT ATTEMPTED NOT SAFETY REASON'  
7='7: NO CHAIR/NO SPACE'  
9='9: NOT ATTEMPTED/MISSING';
```

### VALUE RESULT\_SCH

```
-9='-9: MISSING'  
1='1: COMPLETED W/OUT ARMS'  
2='2: COMPLETED W ARMS'  
3='3: ATTEMPTED W RESULTS'  
4='4: ATTEMPTED MISSING RESULTS'  
5='5: NOT ATTEMPTED SAFETY'  
6='6: NOT ATTEMPTED NOT SAFETY REASON'  
7='7: NO CHAIR/SAFETY REASON'  
8='8: NO CHAIR/NOT SAFETY REAS'  
9='9: NOT ATTEMPTED/MISSING'  
10='10: CH4=1 SINGLE CHAIR NOT COMPL';
```

### VALUE RESULT\_RCH

```
-9='-9: MISSING'  
1='1: COMPLETED W/OUT ARMS'  
2='2: COMPLETED MISSING RESULTS'  
3='3: ATTEMPTED W RESULTS'  
4='4: ATTEMPTED MISSING RESULTS'  
5='5: NOT ATTEMPTED SAFETY'  
6='6: NOT ATTEMPTED NOT SAFETY REASON'  
9='9: NO CHAIR OR NOT ATTEMPTED/MISSING';
```

### VALUE ZEROSCORE

```
1="1: NOT ELIGIBLE DUE TO EXCLUSION CRITERIA"  
2="2: NOT ATTEMPTED FOR SAFETY REASON"  
3="3: ATTEMPTED CHAIR STANDS/NOT ATTEMPTED FOR SAFETY"  
4="4: ATTEMPTED"  
5="5: NEW WALKING EXCLUSION"  
9="9: NOT ASSIGNED A ZERO SCORE";
```

### VALUE D\_LMLLOC

```
1 = '1 Community'  
2 = '2 Residential Care'
```

## SAS ALGORITHM FOR DEMENTIA

```
-1 = '-1 Inapplicable'  
-9 = '-9 Missing';
```

### VALUE D\_LOCSP

```
-7 = '-7 RF'  
-8 = '-8 DK'  
-1 = '-1 Inapplicable'  
-9 = '-9 Missing'  
1 = "1 Independent Living/Housing/Retirement"  
2 = "2 Assisted Living/Personal Care"  
3 = "3 Special Care, Memory or Alzheimer's Unit"  
4 = "4 Nursing Home"  
8 = "8 Not Reported" ;
```

### VALUE PA25FMT

```
-1 = '-1 Inapplicable'  
-9 = '-9 Missing'  
111= '111 Sleeping Napping'  
131= '131 Eating'  
132= '132 Going out to eat'  
199= '199 Other self care activities'  
211= '211 Work and work-related activities'  
221= '221 Other income generating activities'  
241= '241 Volunteering'  
299= '299 Other productive activities'  
321= '321 Shopping for non-durable goods'  
399= '399 Other shopping'  
411= '411 Food and drink preparation'  
434= '434 Outdoor Maintenance'  
439= '439 Household chores (cannot tell if indoor/outdoor)'  
441= '441 Animal and pet care'  
442= '442 Walking and exercising pets'  
449= '449 Other animal and pet care'  
451= '451 Vehicle maintenance and repair'  
471= '471 Financial management'  
499= '499 Other household activities'  
511= '511 Physical care and assistance to others'  
599= '599 Other physical care'  
611= '611 Socializing with others in person'  
612= '612 Socializing with others on the phone'  
616= '616 Socializing and communicating on the computer'  
621= '621 Watching TV and movies'  
631= '631 Doing puzzles or games not on computer or online'  
632= '632 Gambling not online or at a casino'  
636= '636 Doing puzzles or games on a computer or online'  
641= '641 Arts and crafts or hobbies'  
642= '642 Reading'  
643= '643 Writing'  
644= '644 Listening to music'  
646= '646 Computer or online leisure activities'  
651= '651 Smoking or other tobacco use'  
652= '652 Drinking alcohol'  
661= '661 Doing nothing/relaxing'  
669= '669 No activity'  
699= '699 Other non active leisure'  
711= '711 Playing sports'  
712= '712 Walking or jogging'
```

## SAS ALGORITHM FOR DEMENTIA

```
713= '713 Other outdoor recreating activities'  
714= '714 Attending sporting events'  
715= '715 Other physical activity, exercise, yoga, swimming, working out,  
dancing'  
718= '718 Watching sporting events'  
721= '721 Attending arts including plays and concerts'  
723= '723 Attending movies'  
724= '724 Attending casinos'  
737= '737 Travel for leisure'  
799= '799 Other active leisure'  
811= '811 Attending religious activities'  
812= '812 Other religious and spiritual activities'  
821= '821 Attending meetings or events'  
899= '899 Other organizational activity'  
991= '991 Other miscellaneous'  
992= '992 No favorite activity'  
997= '997 Refused'  
998= '998 Dont Know'  
999= '999 Not Codeable';  
  
VALUE OCC_CODE  
1 = '1 Management Occupations: 0010-0430'  
2 = '2 Business and Financial Operations Occupations: 0500-0950'  
3 = '3 Computer and mathematical occupations: 1000-1240'  
4 = '4 Architecture and Engineering Occupations: 1300-1560'  
5 = '5 Life, Physical, and Social Science Occupations: 1600-1965'  
6 = '6 Community and Social Service Occupations: 2000-2060'  
7 = '7 Legal Occupations: 2100-2160'  
8 = '8 Education, Training, and Library Occupations: 2200-2550'  
9 = '9 Arts, Design, Entertainment, Sports, and Media Occupations: 2600-  
2960'  
10 = '10 Healthcare Practitioners and Technical Occupations: 3000-3540'  
11 = '11 Healthcare Support Occupations: 3600-3655'  
12 = '12 Protective Service Occupations: 3700-3955'  
13 = '13 Food Preparation and Serving Related Occupations: 4000-4160'  
14 = '14 Building and Grounds Cleaning and Maintenance Occupations: 4200-  
4250'  
15 = '15 Personal Care and Service Occupations: 4300-4650'  
16 = '16 Sales and Related Occupations: 4700-4965'  
17 = '17 Office and Administrative Support Occupations: 5000-5940'  
18 = '18 Farming, Fishing, and Forestry Occupations: 6000-6130'  
19 = '19 Construction and Extraction Occupations: 6200-6940'  
20 = '20 Installation, Maintenance, and Repair Occupations: 7000-7630'  
21 = '21 Production Occupations: 7700-8965'  
22 = '22 Transportation and Material Moving Occupations: 9000-9750'  
23 = '23 Military Specific Occupations: 9800-9830'  
24 = '24 No current occ (Unemployed, no work in the last 5 years, never  
worked): 9920'  
25 = '25 Blank field'  
26 = '26 Code did not match'  
94 = '94 Uncodable'  
95 = '95 Never Worked Entire Life'  
96 = '96 Homemaker/Raised Children'  
-7 = '-7 RF'  
-8 = '-8 DK'  
-1 = '-1 Inapplicable'  
-9 = '-9 Missing';
```

## SAS ALGORITHM FOR DEMENTIA

```

Value fl_Dfac
1 = '1 Should have routed as facility but did not'
2 = '2 Routed as facility but determined not facility resident'
-1 = '-1 Inapplicable';
VALUE PE_RSLT
  -9='-9 Missing'
  -1 = '-1 Inapplicable'
  1='1 Completed'
  2='2 Attempted'
  3='3 Not attempted' ;
VALUE dosfacd /* FOR FQ2dosfacd */
  -9= "-9 Missing"
  -8 = "-8 DK"
  -1 = "-1 INAPPLICABLE"
  1 = " 1 FREE STANDING NURSING HOME"
  2 = " 2 FREE STANDING ASSISTED LIVING FACILITY / RESIDENTIAL CARE
FACILITY"
  3 = " 3 NURSING HOME AND ASSISTED LIVING FACILITY"
  4 = " 4 CONTINUING CARE RETIREMENT COMMUNITY (CCRC)"
  5 = " 5 ADULT FAMILY CARE HOME"
  6 = " 6 GROUP HOME"
  7 = " 7 BOARD AND CARE HOME / PERSONAL CARE HOME"
  8 = " 8 RETIREMENT COMMUNITY OR SENIOR HOUSING (NOT CCRC)"
  9 = " 9 INDEPENDENT LIVING"
  10 = " 10 ASSISTED AND INDEPENDENT/RETIREMENT (NO NURSING HOME)"
  11 = " 11 HOUSING (APT, CONDO, ETC.)";
;
VALUE dosfaca /* FOR FQ2dosfaca */
  -9= "-9 Missing"
  -8 = "-8 DK"
  -1 = "-1 INAPPLICABLE"
  1 = " 1 INDEPENDENT LIVING / HOUSING / RETIREMENT "
  2 = " 2 ASSISTED LIVING / PERSONAL CARE"
  3 = " 3 SPECIAL CARE, MEMORY CARE, OR ALZHEIMER'S UNIT"
  4 = " 4 NURSING HOME" ;

VALUE INAP_YN
  1 = ' 1 Yes'
  2 = ' 2 No'
  -1 = '-1 Inapplicable' ;
VALUE CENDIV /* RE1DCENSDIV -Updated for R2 - Re-Release */
  1 = '1 Northeast Region: New England Division (ME, NH, VT, MA, RI, CT)'
  2 = '2 Northeast Region: Middle Atlantic Division (NY, NJ, PA)'
  3 = '3 Midwest Region: East North Central Division (OH, IN, IL, MI, WI)'
  4 = '4 Midwest Region: West North Central Division (MN, IA, MO, ND, SD,
NE, KS)'
  5 = '5 South Region: South Atlantic Division (DE, MD, DC, VA, WV, NC,
SC, GA, FL)'
  6 = '6 South Region: East South Central Division (KY, TN, AL, MS)'
  7 = '7 South Region: West South Central Division (AR, LA, OK, TX)'
  8 = '8 West Region: Mountain Division (MT, ID, WY, CO, NM, AZ, UT, NV)'
  9 = '9 West Region: Pacific Division (WA, OR, CA, AK, HI)'
  -9 = '-9 Missing';

VALUE W000002W
  -7 = '-7 RF'

```

## SAS ALGORITHM FOR DEMENTIA

```
-8 = '-8 DK'  
-1 = '-1 Inapplicable'  
-9 = '-9 Missing'  
1 = "1 MALE"  
2 = "2 FEMALE" ;
```

```
VALUE W000005W
```

```
1 = ' 1 Yes'  
2 = ' 2 No'  
-7 = '-7 RF'  
-8 = '-8 DK'  
-1 = '-1 Inapplicable'  
-9 = '-9 Missing';
```

```
VALUE R1DRESID
```

```
1 = '1 Community '  
2 = '2 Residential Care Resident not nursing home (SP interview  
complete)'  
3 = '3 Residential Care Resident not nursing home (FQ only)'  
4 = '4 Nursing Home Resident';
```

```
VALUE W200016W
```

```
-7 = '-7 RF'  
-8 = '-8 DK'  
-1 = '-1 Inapplicable'  
-9 = '-9 Missing'  
1 = "1 MEDICAID"  
2 = "2 MEDICARE"  
3 = "3 STATE PROGRAM"  
91 = "91 OTHER (SPECIFY)" ;
```

```
VALUE W200012W
```

```
-7 = '-7 RF'  
-8 = '-8 DK'  
-1 = '-1 Inapplicable'  
-9 = '-9 Missing'  
1 = "1 REGULAR"  
2 = "2 VARIED" ;
```

```
VALUE W200061W
```

```
-7 = '-7 RF'  
-8 = '-8 DK'  
-1 = '-1 Inapplicable'  
-9 = '-9 Missing'  
1 = "1 SEPARATION OR DIVORCE"  
2 = "2 DECEASED"  
3 = "3 MOVED ELSEWHERE"  
5 = "5 LAST INTERVIEW INFORMATION INCORRECT"  
8 = "8 OTHER REASON" ;
```

```
VALUE d2hrsmth
```

```
-13= '-13 Deceased '  
-12= '-12 Zero days/wk'  
-11= '-11 Hours missing'  
-10= '-10 Days missing'  
-9 = ' -9 Days and hrs missing'  
-1 = ' -1 Inapplicable'
```

## SAS ALGORITHM FOR DEMENTIA

```
-7 = ' -7 RF'  
-8 = ' -8 DK'  
0-<1 = '<1'  
1-<10 = ' 1-<10'  
10-<20 = '10-<20'  
20-<30 = '20-<30'  
30-<40 = '30-<40'  
40-<60 = '40-<60'  
60-<120 = '60-<120'  
120-<180 = '120-<180'  
180-744 = '180-744 (24/7)'  
9999 = '9999 Not codeable, <1 hour/day' ;
```

### VALUE dhrrsmth

```
-11 = '-11:hours missing'  
-10 = '-10:days missing'  
-9 = '-9:days and hrs missing'  
-1 = '-1 Inapplicable'  
-7 = ' -7 RF'  
-8 = ' -8 DK'  
0-<1 = '<1'  
1-<10 = ' 1-<10'  
10-<20 = '10-<20'  
20-<30 = '20-<30'  
30-<40 = '30-<40'  
40-<60 = '40-<60'  
60-<120 = '60-<120'  
120-<180 = '120-<180'  
180-744 = '180-744 (24/7)'  
9999 = '9999 Not codeable, <1 hour/day' ;
```

### Value dmissadd

```
-1 = '-1 not applicable'  
1 = '1 no flags and added at CL section'  
2 = '2 no flags and added at DT section'  
3 = '3 no flags and added at EW section'  
4 = '4 no flags and added at HA section'  
5 = '5 no flags and added at HO section'  
6 = '6 no flags and added at MC section'  
7 = '7 no flags and added at MO section'  
8 = '8 no flags and added at PA section'  
9 = '9 no flags and added at PE section'  
10 = '10 no flags and added at SC section'  
11 = '11 no flags and added at SN section';
```

### Value d2mssadd

```
-1 = '-1 Inapplicable'  
0 = '0 no flags and added at undetermined section'  
1 = '1 no flags and added at CL section'  
2 = '2 no flags and added at DT section'  
3 = '3 no flags and added at EW section'  
4 = '4 no flags and added at HA section'  
5 = '5 no flags and added at HO section'  
6 = '6 no flags and added at MC section'  
7 = '7 no flags and added at MO section'  
8 = '8 no flags and added at PA section'  
9 = '9 no flags and added at PE section'
```

## SAS ALGORITHM FOR DEMENTIA

```
10='10 no flags and added at SC section'  
11='11 no flags and added at SN section'  
12='12 no flags and added at CS section'  
13='13 no flags and added at HH section'  
14='14 no flags and added at IS section';
```

Value dopage3c

```
-9='-9 Missing'  
-8='-8 RF'  
-7='-7 DK'  
-1='-1 Inapplicable'  
1='1 UNDER 30'  
2='2 30-39'  
3='3 40-49'  
4='4 50-59'  
5='5 60-69'  
6='6 70-79'  
7='7 80-89'  
8='8 90 +';
```

Value dopagect

```
-9='-9 Missing'  
-8='-8 DK'  
-7='-7 RF'  
-1='-1 Inapplicable'  
1='1 UNDER 20'  
2='2 20-24'  
3='3 25-29'  
4='4 30-34'  
5='5 35-39'  
6='6 40-44'  
7='7 45-49'  
8='8 50-54'  
9='9 55-59'  
10='10 60-64'  
11='11 65-69'  
12='12 70-74'  
13='13 75-79'  
14='14 80-84'  
15='15 85-89'  
16='16 90 +';
```

VALUE W200008W

```
-7 = '-7 RF'  
-8 = '-8 DK'  
-1 = '-1 Inapplicable'  
-9 = '-9 Missing'  
1 = "1 UNDER 20"  
2 = "2 20-24"  
3 = "3 25-29"  
4 = "4 30-34"  
5 = "5 35-39"  
6 = "6 40-44"  
7 = "7 45-49"  
8 = "8 50-54"  
9 = "9 55-59"
```

## SAS ALGORITHM FOR DEMENTIA

```
10 = "10 60-65"  
11 = "11 66-69"  
12 = "12 70-74"  
13 = "13 75-79"  
14 = "14 80-85"  
15 = "15 86-89"  
16 = "16 90-94"  
17 = "17 95-99"  
18 = "18 100 +"  
;  
VALUE NumCigs  
-7 = '-7 RF'  
-8 = '-8 DK'  
-1 = '-1 Inapplicable'  
-9 = '-9 Missing'  
999 = '999 SP smokes less than 1 cigarette / day';  
  
VALUE dlmlint  
1 = '1 Last month of life interview'  
-1 = '-1 Inapplicable' ;  
  
VALUE d2intvra  
1 = '1 65 to 69'  
2 = '2 70 to 74'  
3 = '3 75 to 79'  
4 = '4 80 to 84'  
5 = '5 85 to 89'  
6 = '6 90+'  
-7 = '-7 RF'  
-8 = '-8 DK'  
-1 = '-1 Inapplicable'  
-9 = '-9 Missing' ;  
  
VALUE dad8dem  
1 = '1 DEMENTIA RESPONSE TO ANY AD8 ITEMS IN PRIOR ROUNDS'  
-1 = '-1 Inapplicable' ;  
  
VALUE dwrdirre  
1 = '1 NO WORDS REMEMBERED'  
-1 = '-1 Inapplicable'  
-9 = '-9 Missing' ;  
  
VALUE dwrdirre  
1 = '1 REFUSED WORD RECALL TASK'  
-1 = '-1 Inapplicable'  
-9 = '-9 Missing' ;  
  
VALUE A0001AB  
1 = "1 AM"  
2 = "2 PM"  
-1 = '-1 Inapplicable'  
-9 = '-9 Missing';  
  
VALUE A0002WA  
1 = "1 Yes, there is space to set up the walking course"  
2 = "2 No, there is not space to set up the walking course"
```



## SAS ALGORITHM FOR DEMENTIA

```
-1 = '-1 Inapplicable'  
-9 = '-9 Missing';
```

### VALUE A0004WA

```
1 = "1 None"  
2 = "2 Cane"  
3 = "3 Walker or rollator"  
9 = "9 Other, specify"  
-1 = '-1 Inapplicable'  
-7 = '-7 RF'  
-8 = '-8 DK'  
-9 = '-9 Missing';
```

### VALUE A0004CH

```
1 = "1 No, chair stand not completed"  
2 = "2 Yes, chair stand completed"  
-1 = '-1 Inapplicable'  
-9 = '-9 Missing';
```

### VALUE A0008CH

```
1 = "1 With arms"  
2 = "2 Without arms"  
-1 = '-1 Inapplicable'  
-9 = '-9 Missing';
```

### VALUE A0014CH

```
1 = "1 1 Chair stand completed"  
2 = "2 2 Chair stands completed"  
3 = "3 3 Chair stands completed"  
4 = "4 4 Chair stands completed"  
-1 = '-1 Inapplicable'  
-9 = '-9 Missing';
```

### VALUE BA1SS

```
1 = '1 Eligible and recorded result for SxS Balance'  
2 = '2 Eligible and no recorded result for SxS Balance'  
4 = '4 Not Eligible due to exclusion criteria'  
-1 = '-1 Inapplicable'  
-9 = '-9 Missing';
```

### VALUE BA1STAN

```
1 = '1 Eligible and recorded result for Semi Tandem Balance'  
2 = '2 Eligible and no recorded result for Semi Tandem Balance'  
3 = '3 Not administered because did not complete prior balance test'  
4 = '4 Not Eligible due to exclusion criteria'  
-1 = '-1 Inapplicable'  
-9 = '-9 Missing';
```

### VALUE BA1TAN

```
1 = '1 Eligible and recorded result for full tandem balance'  
2 = '2 Eligible and no recorded result for full tandem balance'  
3 = '3 Not administered because did not complete prior balance tests'  
4 = '4 Not Eligible due to exclusion criteria'  
-1 = '-1 Inapplicable'  
-9 = '-9 Missing';
```

### VALUE BA1OP

## SAS ALGORITHM FOR DEMENTIA

```
1 = '1 Eligible and recorded result for one leg eyes open balance'  
2 = '2 Eligible and no recorded result for one leg eyes open balance'  
3 = '3 Not administered because did not complete prior balance tests'  
4 = '4 Not Eligible due to exclusion criteria'  
-1 = '-1 Inapplicable'  
-9 = '-9 Missing';
```

### VALUE BA1CL

```
1 = '1 Eligible and recorded result for one leg eyes closed balance'  
2 = '2 Eligible and no recorded result for one leg eyes closed balance'  
3 = '3 Not administered because did not complete prior balance tests'  
4 = '4 Not Eligible due to exclusion criteria'  
-1 = '-1 Inapplicable'  
-9 = '-9 Missing';
```

### VALUE WA1WLK

```
1 = '1 Eligible and recorded result for walking course'  
2 = '2 Eligible and no recorded result for walking course'  
4 = '4 Not Eligible due to exclusion criteria'  
5 = '5 Not Eligible on exclusion criteria but recorded result (SP changed  
mind)'  
-1 = '-1 Inapplicable '  
-9 = '-9 Missing';
```

### VALUE CH1SCH

```
1 = '1 Eligible and recorded result for single chair stand'  
2 = '2 Eligible and no recorded result for single chair stand'  
4 = '4 Not Eligible due to exclusion criteria'  
-1 = '-1 Inapplicable'  
-9 = '-9 Missing';
```

### VALUE CH1RSH

```
1 = '1 Eligible and recorded result for repeated chair stand'  
2 = '2 Eligible and no recorded result for repeated chair stand'  
3 = '3 Not administered because did not complete single chair stand w/o  
arms'  
4 = '4 Not Eligible due to exclusion criteria'  
-1 = '-1 Inapplicable'  
-9 = '-9 Missing';
```

### VALUE GR1GRIP

```
1 = '1 Eligible and recorded result for grip strength'  
2 = '2 Eligible and no recorded result for grip strength'  
4 = '4 Not Eligible due to exclusion criteria'  
-1 = '-1 Inapplicable'  
-9 = '-9 Missing';
```

### VALUE WC1WAIST

```
1 = '1 Eligible and recorded result for waist circumference'  
2 = '2 Eligible and no recorded result for waist circumference'  
-1 = '-1 Inapplicable'  
-9 = '-9 Missing';
```

### VALUE PK1PEAK

```
1 = '1 Eligible and recorded result for peak air flow'  
2 = '2 Eligible and no recorded result for peak air flow'  
-1 = '-1 Inapplicable'
```

## SAS ALGORITHM FOR DEMENTIA

```
-9 = '-9 Missing';
```

```
VALUE RGT_LFT
```

```
1 = '1 Right'  
2 = '2 Left'  
-1 = '-1 Inapplicable'  
-9 = '-9 Missing';
```

```
VALUE PERSON
```

```
1 = '1 Interviewer'  
2 = '2 Sample person'  
-1 = '-1 Inapplicable'  
-9 = '-9 Missing';
```

```
VALUE STAND
```

```
1 = '1 Standing'  
2 = '2 Sitting'  
3 = '3 Lying down'  
-1 = '-1 Inapplicable'  
-9 = '-9 Missing';
```

```
VALUE EFFORT
```

```
1 = '1 Full effort'  
2 = '2 Less effort for health reason'  
3 = '3 Less effort for other reason'  
-1 = '-1 Inapplicable'  
-9 = '-9 Missing';
```

```
VALUE WORDREC
```

```
1 = ' 1 LIST 1'  
2 = ' 2 LIST 2'  
3 = ' 3 LIST 3'  
-1 = '-1 Inapplicable '  
-9 = '-9 Missing';
```

```
VALUE WORDRE_N
```

```
-1 = '-1 Inapplicable'  
-2 = '-2 Proxy says cannot ask SP'  
-3 = '-3 Proxy says can ask SP but SP unable to answer'  
-7 = '-7 SP refused activity'  
-9 = '-9 Missing';
```

```
VALUE DMH_GRP
```

```
1 = "1 Help started"  
2 = "2 Help ended"  
3 = "3 Help both interviews with gap"  
4 = "4 Help both interviews with no gap"  
5 = "5 Help between interviews only (month ended missing)"  
6 = "6 No help either interview or between"  
11 = "11 Help started (month started missing)"  
21 = "21 Help ended (month ended missing)"  
41 = "41 Help both interviews (DK whether gap)"  
61 = "61 No help either interview (DK whether help between)"  
-9 = "-9 Missing"  
-1 = "-1 Inapplicable"  
-999 = "-999 Not determined" ;
```

```
VALUE DMU_GRP
```

```
1 = "1 Use started"
```

## SAS ALGORITHM FOR DEMENTIA

```
2 = "2 Use ended"  
3 = "3 Use both interviews with gap"  
4 = "4 Use both interviews with no gap"  
5 = "5 Use between interviews only (month ended missing)"  
6 = "6 No use either interview or between"  
11 = "11 Use started (month started missing)"  
21 = "21 Use ended (month ended missing)"  
41 = "41 Use both interviews (DK whether gap)"  
61 = "61 No use either interview (DK whether use between)"  
-9 = "-9 Missing"  
-1 = "-1 Inapplicable"  
-999 = "-999 Not determined" ;  
  
VALUE DS_GRP  
1 = "1 Help started"  
2 = "2 Help ended"  
3 = "3 Help both interviews with gap"  
4 = "4 Help both interviews with no gap"  
5 = "5 Help between interviews only"  
6 = "6 No help either interview or between"  
11 = "11 Help started (month started missing)"  
21 = "21 Help ended (month ended missing)"  
41 = "41 Help both interviews (DK whether gap)"  
61 = "61 No help either interview (DK whether help between)"  
-9 = "-9 Missing"  
-1 = "-1 Inapplicable"  
-999 = "-999 Not determined" ;  
  
VALUE DMDSINTV  
0 = "0 Less than 1 month"  
1 = "1 Month"  
2 = "2 Months"  
3 = "3 Months"  
4 = "4 Months"  
5 = "5 Months"  
6 = "6 Months"  
7 = "7 Months"  
8 = "8 Months"  
9 = "9 Months"  
10 = "10 Months"  
11 = "11 Months"  
12 = "12 Months"  
13 = "13 Months"  
14 = "14 Months"  
15 = "15 Months"  
16 = "16 Months"  
17 = "17 Months"  
18 = "18 Months"  
19 = "19 Months"  
20 = "20 Months"  
21 = "21 Months"  
22 = "22 Months"  
23 = "23 Months"  
24 = "24 Months"  
90 = "90 Last round disputed"  
-1 = "-1 Inapplicable"  
-7 = "-7 Refused"
```

## SAS ALGORITHM FOR DEMENTIA

```
-8 = "-8 Dont know"
-9 = "-9 Missing" ;

VALUE DMDS_DUR
  0 = "0 Less than 1 month"
  1 = "1 Month"
  2 = "2 Months"
  3 = "3 Months"
  4 = "4 Months"
  5 = "5 Months"
  6 = "6 Months"
  7 = "7 Months"
  8 = "8 Months"
  9 = "9 Months"
 10 = "10 Months"
 11 = "11 Months"
 12 = "12 Months"
 13 = "13 Months"
 14 = "14 Months"
 15 = "15 Months"
 16 = "16 Months"
 17 = "17 Months"
 90 = "90 Last round disputed"
-1 = "-1 Inapplicable"
-7 = "-7 Refused"
-8 = "-8 Dont know"
-9 = "-9 Missing"
-10 = "-10 Not ascertained"
-12 = "-12 Outside of range"
-13 = "-13 None"
-999 = "-999 Not determined" ;

VALUE DMDSFLG
-1 = "-1 Inapplicable"
 1 = "1 No SP interview last round"
 2 = "2 Died and month death missing"
 3 = "3 Died <=1 month after last interview"
 4 = "4 Died 12-13 months after last interview"
 5 = "5 Died and not mobile (fl2notmobile=1)"
 6 = "6 Died and not alert (fl2notalert =1)"
 7 = "7 Skipped 1 or more help questions" ;

VALUE DMDS3FLG
-1 = "-1 Inapplicable"
 1 = "1 No SP interview last round"
 2 = "2 Died and month death missing"
 3 = "3 Died <=1 month after last interview"
 4 = "4 Died 12-13 months after last interview"
 5 = "5 Died and not mobile (fl3notmobile=1)"
 6 = "6 Died and not alert (fl3notalert =1)"
 7 = "7 Skipped 1 or more help questions" ;

VALUE SP30051W
-7 = '-7 RF'
-8 = '-8 DK'
-1 = '-1 Inapplicable'
-9 = '-9 Missing'
 1 = "1 EXCELLENT"
 2 = "2 VERY GOOD"
```

## SAS ALGORITHM FOR DEMENTIA

```
3 = "3 GOOD"
4 = "4 FAIR"
5 = "5 POOR"
6 = "6 DOES NOT APPLY/NO CARE IN LAST MONTH OF LIFE"
;
VALUE SP3019aW
  -7 = '-7 RF'
-8 = '-8 DK'
-1 = '-1 Inapplicable'
-9 = '-9 Missing'
1 = "1 JANUARY"
2 = "2 FEBRUARY"
3 = "3 MARCH"
4 = "4 APRIL"
5 = "5 MAY"
6 = "6 JUNE"
7 = "7 JULY"
8 = "8 AUGUST"
9 = "9 SEPTEMBER"
10 = "10 OCTOBER"
11 = "11 NOVEMBER"
12 = "12 DECEMBER"
90 = "90 LAST INTERVIEW INFORMATION INCORRECT"
;
VALUE RACEHISP
  1 = ' 1 White, non-hispanic'
  2 = ' 2 Black, non-hispanic'
  3 = ' 3 Other (Am Indian/Asian/Native Hawaiian/Pacific Islander/other
specify), non-Hispanic'
  4 = ' 4 Hispanic'
  5 = ' 5 More than one DKRF primary'
  6 = ' 6 DKRF'
  -9 = '-9 Missing';

/* The following may not need to be included on the public release file but
are
      needed for internal Westat File processing */

VALUE SPPB_MISSING
  -7 = '-7 RF'
-8 = '-8 DK'
-9 = '-9 Missing'
-1="1 Inapplicable"
1="1 PROXY INTERVIEW"
2="2 MISSING WALK AND REPEAT CHAIR AND BALANCE"
3="3 MISSING WALK AND REPEAT CHAIR"
4="4 MISSING WALK AND BALANCE"
5="5 MISSING REPEAT CHAIR AND BALANCE"
6="6 MISSING WALK"
7="7 MISSING REPEAT CHAIR"
8="8 MISSING BALANCE"
9="9 NO SPACE"
10="10 NO CHAIR"
11="11 NO SPACE WALK AND NO CHAIR"
12="12 NO SPACE WALK AND NON-SAFETY MISSING"
13="13 NO CHAIR AND NON-SAFETY MISSING"
14="14 NON-SAFETY WALK"
```

## SAS ALGORITHM FOR DEMENTIA

```
15="15 NON-SAFETY CHAIR"  
16="16 NON-SAFETY BALANCE"  
17="17 NON-SAFETY WALK AND CHAIR"  
18="18 NON-SAFETY WALK AND BALANCE"  
19="19 NON-SAFETY CHAIR AND BALANCE"  
20="20 NON SAFETY WALK AND CHAIR AND BALANCE";  
  
VALUE QUARTILES  
-9="-9 Missing"  
-1="-1 Inapplicable"  
;  
VALUE SP30025W  
-7 = '-7 RF'  
-8 = '-8 DK'  
-1 = '-1 Inapplicable'  
-9 = '-9 Missing'  
1 = "1 FREE-STANDING (DETACHED) SINGLE HOUSE"  
2 = "2 SINGLE HOUSE BUT ATTACHED TO OTHERS (ROW HOUSE, TOWNHOUSE, DUPLEX,  
TRIPLEX, OR TRIPLE DECKER)"  
3 = "3 MOBILE HOME OR TRAILER"  
4 = "4 MULTI-UNIT (2+) BUILDING"  
91 = "91 OTHER (SPECIFY)"  
;  
VALUE SP30046W  
-7 = '-7 RF'  
-8 = '-8 DK'  
-1 = '-1 Inapplicable'  
-9 = '-9 Missing'  
1 = "1 AT SP'S HOME"  
2 = "2 IN A HOSPITAL"  
3 = "3 IN A NURSING HOME"  
4 = "4 IN A HOSPICE RESIDENCE"  
5 = "5 AT SOMEONE ELSE'S HOME"  
91 = "91 SOMEWHERE ELSE (SPECIFY)"  
;  
VALUE SP30076W  
-7 = '-7 RF'  
-8 = '-8 DK'  
-1 = '-1 Inapplicable'  
-9 = '-9 Missing'  
1 = "1 YES"  
2 = "2 NO"  
7 = "7 YES, DOESNT KNOW HOW TO USE"  
;  
VALUE W300151W  
-7 = '-7 RF'  
-8 = '-8 DK'  
-1 = '-1 Inapplicable'  
-9 = '-9 Missing'  
1 = "1 VERY GOOD"  
2 = "2 GOOD"  
3 = "3 FAIR"  
4 = "4 POOR"  
5 = "5 VERY POOR" ;  
  
VALUE SP30076H  
-7 = '-7 RF'
```

## SAS ALGORITHM FOR DEMENTIA

```

-8 = '-8 DK'
-1 = '-1 Inapplicable'
-9 = '-9 Missing'
95 = "95 NO USUAL NUMBER OF HOURS OR DIFFERENT FROM DAY TO DAY" ;
VALUE SP30076G
-7 = '-7 RF'
-8 = '-8 DK'
-1 = '-1 Inapplicable'
-9 = '-9 Missing'
95 = "95 NO USUAL TIME OR DIFFERENT FROM DAY TO DAY" ;
VALUE SP30076I
-7 = '-7 RF'
-8 = '-8 DK'
-1 = '-1 Inapplicable'
-9 = '-9 Missing'
95 = "95 NO USUAL NUMBER OF HOURS OR DIFFERENT FROM NIGHT TO NIGHT"
;

VALUE SP30076J
-7 = '-7 RF'
-8 = '-8 DK'
-1 = '-1 Inapplicable'
-9 = '-9 Missing'
95 = "95 NO USUAL TIME OR DIFFERENT FROM NIGHT TO NIGHT" ;
VALUE SP30076K
-7 = '-7 RF'
-8 = '-8 DK'
-1 = '-1 Inapplicable'
-9 = '-9 Missing'
0 = "0 LESS THAN AN HOUR"
90 = "90 FELL ASLEEP RIGHT AWAY"
95 = "95 NO USUAL AMOUNT OF TIME TO FALL ASLEEP OR DIFFERENT FROM
NIGHT TO NIGHT" ;
VALUE SP30155W
-7 = '-7 RF'
-8 = '-8 DK'
-1 = '-1 Inapplicable'
-9 = '-9 Missing'
1 = "1 NAPS PLANNED"
2 = "2 FELL ASLEEP WITHOUT MEANING TO"
3 = "3 BOTH (SOME PLANNED/SOME NOT)"
;

VALUE SP30120W
-7 = '-7 RF'
-8 = '-8 DK'
-1 = '-1 Inapplicable'
-9 = '-9 Missing'
1 = "1 OFTEN"
2 = "2 SOMETIMES"
3 = "3 RARELY"
4 = "4 NEVER" ;
Value HOURSF
-13='-13 SP deceased/section not administered'
-12='-12 Valid skip/staff'
-11='-11 Hours missing'
-10='-10 Days missing'
-9='-9 Days and hrs missing'
-1='-1 Inapplicable'

```



## SAS ALGORITHM FOR DEMENTIA

```
0- 1='0-<1'  
1.01- 10='1-<10'  
10.01- 20='10-<20'  
20.01- 30='20-<30'  
30.01-40='30-<40'  
40.01-60='40-<60'  
60.01-120='60-<120'  
120.01-180='120-<180'  
180.01-744='180-744 (24/7)'  
9999='9999 Not codeable, <1 hour/day';  
VALUE SP30120W  
-7 = '-7 RF'  
-8 = '-8 DK'  
-1 = '-1 Inapplicable'  
-9 = '-9 Missing'  
1 = "1 OFTEN"  
2 = "2 SOMETIMES"  
3 = "3 RARELY"  
4 = "4 NEVER"  
;  
VALUE SP30118W  
-7 = '-7 RF'  
-8 = '-8 DK'  
-1 = '-1 Inapplicable'  
-9 = '-9 Missing'  
1 = "1 A LOT"  
2 = "2 SOME"  
3 = "3 A LITTLE"  
4 = "4 NOT AT ALL"  
;  
VALUE SP30141W  
-7 = '-7 RF'  
-8 = '-8 DK'  
-1 = '-1 Inapplicable'  
-9 = '-9 Missing'  
1 = "less than $27,600,"  
2 = "$27,600-$41,999,"  
3 = "$42,000-$63,999,"  
4 = "$64,000-$107,999, or"  
5 = "$108,000 or more?"  
;  
VALUE SP30142W  
-7 = '-7 RF'  
-8 = '-8 DK'  
-1 = '-1 Inapplicable'  
-9 = '-9 Missing'  
1 = "less than $14,000,"  
2 = "$14,000-$21,999,"  
3 = "$22,000-$35,999,"  
4 = "$36,000-$48,999, or"  
5 = "$49,000 or more?"  
;  
VALUE INVENT  
-7 = '-7 RF'  
-8 = '-8 DK'  
-1 = '-1 Inapplicable'
```

## SAS ALGORITHM FOR DEMENTIA

```
-9 = '-9 Missing'  
104="104-Arthritis"  
107="107-Lung Disease"  
109="109-Dementia or Alzheimer's disease"  
110="110-Cancer"  
113="113-Other serious disease, illness, health problem"  
114="114-Knee surgery/problem"  
115="115-Hip repair or replacement/problem"  
117="117-Back or Spine Surgery/problem"  
121="121-Sleep Problems"  
201="201-Hearing problems"  
202="202-Sight problems"  
205="205-Pain"  
301="301-Breathing problems"  
302="302-Upper body strength movement"  
303="303-Lower body strength movement"  
304="304-Low energy"  
305="305-Balance or coordination problems"  
306="306-Walking distances"  
307="307-Climbing stairs"  
308="308-Lifting and carrying items"  
309="309-Kneeling"  
310="310-Bending"  
311="311-Reaching"  
312="312-Opening Jars"  
313="313-Grasping"  
401="401-Memory"  
501="501-Getting out of bed"  
502="502-Getting around inside"  
503="503-Getting outside"  
504="504-Travel/transportation"  
601="601-Eating"  
602="602-Washing"  
603="603-Toileting"  
604="604-Dressing"  
605="605-Grooming"  
701="701-Laundry"  
702="702-Shopping"  
703="703-Cooking"  
705="705-Money matters"  
706="706-Indoor cleaning and maintenance"  
707="707-Outdoor cleaning and maintenance"  
801="801-Medications"  
802="802-Doctor visits"  
804="804-Other medical self-care"  
1211="1211-Working"  
1442="1442-Walking/exercising pets"  
1451="1451-Vehicle repair and maintenance"  
1461="1461-Appliance tool, and toy use, set-up, repair, &  
maintenance"  
1462="1462-Computer use, set-up, repair, maintenance, and  
education"  
1473="1473-Household organization"  
1512="1512-Looking after someone else"  
1611="1611-Socializing and communicating with others-in person"  
1612="1612-Socializing and communication with others by talking  
on telephone"
```

## SAS ALGORITHM FOR DEMENTIA

```
occasions"    1613="1613-Attending or hosting party, wedding or social
              1614="1614-Reading and sorting through the mail"
              1621="1621-Watch television and movies"
              1631="1631-Games & puzzles"
              1641="1641-Arts and crafts, collecting, and hobbies, making
music"
              1642="1642-Reading"
              1643="1642-Writing (personal, not on computer)"
              1644="1644-Listening to recorded music or radio"
              1711="1711-Playing/practicing sports or taking physical activity
class/lessons"
              1712="1712-Walking/jogging for exercise or pleasure or working
out"
              1713="1713-Other outdoor recreation activities"
              1813="1813-Religious & spiritual volunteer activities"
              1901="1901-Other, no existing code"
              1998="1998-Don't know"
              1999="1999-Refused/blank";
```

```
VALUE Imp_Flg
  -7 = '-7 RF'
  -8 = '-8 DK'
  -1 = '-1 Inapplicable'
  -9 = '-9 Missing'
   0 = "0 No"
   1 = "1 Yes" ;
```

**run;**

```
/*=====*/
```

```
/* NHATS_Round_4_Combined_PROC_FORMAT_Statement.sas */
```

**PROC FORMAT ;**

```
VALUE release
  1 = '1 Main Sample'
  2 = '2 Reserve Sample'
  9 = '9 New Release Sample';
```

```
VALUE STAT_DTa
  4 = " 4 April"
  5 = " 5 May"
  6 = " 6 June"
  7 = " 7 July"
  8 = " 8 August"
  9 = " 9 September"
 10 = "10 October"
 11 = "11 November"
 99 = "99 Prior to start of field work"
 -1 = '-1 Inapplicable';
```

```
VALUE $DISP
  '10' = "10 Not Available "
  '11' = "11 Ready"
  '12' = "12 Started "
```

## SAS ALGORITHM FOR DEMENTIA

```
'20' = "20 Final "  
'24' = "24 Not Required "  
'60' = "60 Complete "  
'61' = "61 Complete, NH facility"  
'62' = "62 Complete SP Deceased, Proxy Intv"  
'63' = "63 Complete SP, FQ not complete"  
'64' = "64 Complete FQ, SP not complete"  
'75' = "75 Physically/mentally unable to participate, no proxy"  
'76' = "76 Too ill to participate, no proxy"  
'77' = "77 Refusal, SP"  
'78' = "78 Language barrier"  
'79' = "79 Unable to locate"  
'80' = "80 Unavailable during field period"  
'82' = "82 Outside of PSU"  
'83' = "83 Ineligible"  
'85' = "85 Refusal, facility"  
'86' = "86 Deceased"  
'87' = "87 Refusal, proxy"  
'88' = "88 Work stopped" ;
```

VALUE DISP\_a

```
10 = "10 Not Available"  
11 = "11 Ready"  
12 = "12 Started"  
20 = "20 Final"  
24 = "24 Not Required"  
60 = "60 Complete"  
61 = "61 Complete, NH facility"  
62 = "62 Complete SP Deceased, Proxy Intv"  
63 = "63 Complete SP, FQ not complete"  
64 = "64 Complete FQ, SP not complete "  
75 = "75 Physically/mentally unable to participate, no proxy"  
76 = "76 Too ill to participate, no proxy"  
77 = "77 Refusal, SP"  
78 = "78 Language barrier"  
79 = "79 Unable to locate"  
80 = "80 Unavailable during field period"  
82 = "82 Outside of PSU"  
83 = "83 Ineligible"  
85 = "85 Refusal, facility"  
86 = "86 Deceased"  
87 = "87 Refusal, proxy"  
88 = "88 Work stopped" ;
```

VALUE DISP\_

```
10 = "10 Not Available"  
11 = "11 Ready"  
12 = "12 Started"  
20 = "20 Final"  
24 = "24 Not Required";
```

VALUE DISP\_F

```
-1 = '-1 Inapplicable'  
10 = "10 Not Available"  
11 = "11 Ready"  
12 = "12 Started"  
20 = "20 Final"
```

## SAS ALGORITHM FOR DEMENTIA

```
24 = "24 Not Required"  
60 = "60 Complete"  
61 = "61 Complete, NH facility"  
62 = "62 Complete SP Deceased, Proxy Intv"  
63 = "63 Complete SP, FQ not complete"  
64 = "64 Complete FQ, SP not complete "  
75 = "75 Physically/mentally unable to participate, no proxy"  
76 = "76 Too ill to participate, no proxy"  
77 = "77 Refusal, SP"  
78 = "78 Language barrier"  
79 = "79 Unable to locate"  
80 = "80 Unavailable during field period"  
82 = "82 Outside of PSU"  
83 = "83 Ineligible"  
85 = "85 Refusal, facility"  
86 = "86 Deceased"  
87 = "87 Refusal, proxy"  
88 = "88 Work stopped"  
89 = "89 Final, Other Specify";
```

```
VALUE RFDK
```

```
-7 = '-7 RF'  
-8 = '-8 DK'  
-1 = '-1 Inapplicable'  
-9 = '-9 Missing';
```

```
VALUE $RFDK_F
```

```
'-7' = '-7 RF'  
'-8' = '-8 DK'  
'-1' = '-1 Inapplicable'  
'-9' = '-9 Missing';
```

```
VALUE RFDK_F
```

```
-7 = '-7 RF'  
-8 = '-8 DK'  
-1 = '-1 Inapplicable'  
-9 = '-9 Missing';
```

```
VALUE RFDK_B
```

```
-1 = '-1 Inapplicable'  
1 = '1 Yes-Breakoff';
```

```
VALUE $RFDK_C
```

```
'-1' = '-1 Inapplicable'  
'CL' = 'CL - Closing'  
'EW' = 'EW - Economic Well-Being'  
'FQ' = 'FQ - Facility Questionnaire'  
'HL' = 'HL - Helper'  
'HW' = 'HW - Height and Weight'  
'IP' = 'IP - Insurance Plans'  
'LF' = 'LF - Labor Force'  
'PA' = 'PA - Participation'  
'PE' = 'PE - Performance'  
'WB' = 'WB - Well-being' ;
```

```
VALUE $RFDK_2C
```

```
'-1' = '-1 Inapplicable'
```

## SAS ALGORITHM FOR DEMENTIA

```
'-7' = '-7 RF'  
'-8' = '-8 DK'  
'-9' = '-9 Missing';
```

```
VALUE $RFDK_3C  
  '-1 ' = '-1 Inapplicable'  
  '-7 ' = '-7 RF'  
  '-8 ' = '-8 DK'  
  '-9 ' = '-9 Missing';
```

```
VALUE RFDK_Y  
  1 = ' 1 Yes'  
 -7 = '-7 RF'  
 -8 = '-8 DK'  
 -1 = '-1 Inapplicable'  
 -9 = '-9 Missing';
```

```
VALUE RFDK_YN  
  1 = ' 1 Yes'  
  2 = ' 2 No'  
 -7 = '-7 RF'  
 -8 = '-8 DK'  
 -1 = '-1 Inapplicable'  
 -9 = '-9 Missing';
```

```
VALUE DSTRP_G  
 -7 = '-7 RF'  
 -8 = '-8 DK'  
 -1 = '-1 Inapplicable'  
 -9 = '-9 Missing'  
  1 = '1 X condition and word color condition accuracy below threshold  
(less than .42)'  
  2 = '2 word condition only below threshold (less than .42)'  
  3 = '3 X condition and word color condition meet criteria for accuracy'  
  4 = '4 fewer than 50% of X and word color condition trials answered'  
 999 = '999 X condition only below threshold (less than .42)';
```

```
VALUE DSTRP_R  
 -7 = '-7 RF'  
 -8 = '-8 DK'  
 -1 = '-1 Inapplicable'  
 -999 = '-999 Inapplicable'  
 other = 'Values ranging between -.353 and 1.115';
```

```
VALUE DSTRP_M  
 -7 = '-7 RF'  
 -8 = '-8 DK'  
 -1 = '-1 Inapplicable'  
 -999 = '-999 Inapplicable'  
 other = 'Values ranging between -544.732 and 924.863';
```

```
VALUE FQ_4F  
 -7 = '-7 RF'  
 -8 = '-8 DK'  
 -1 = '-1 Inapplicable'  
 -9 = '-9 Missing'  
  1 = '1 YES'
```

## SAS ALGORITHM FOR DEMENTIA

```
2='2 NO';
```

```
VALUE CHILDDDEC
```

```
1 = '1 CHILD DECEASED'  
-7 = '-7 RF'  
-8 = '-8 DK'  
-1 = '-1 Inapplicable'  
-9 = '-9 Missing';
```

```
VALUE W200001W
```

```
12 = "12 STARTED"  
20 = "20 COMPLETE"  
21 = "21 INELIGIBLE - NOT 65+" ;
```

```
VALUE W200008x
```

```
-7 = '-7 RF'  
-8 = '-8 DK'  
-1 = '-1 Inapplicable'  
-9 = '-9 Missing'  
1 = "1 UNDER 20"  
2 = "2 20-24"  
3 = "3 25-29"  
4 = "4 30-34"  
5 = "5 35-39"  
6 = "6 40-44"  
7 = "7 45-49"  
8 = "8 50-54"  
9 = "9 55-59"  
10 = "10 60-64"  
11 = "11 65-69"  
12 = "12 70-74"  
13 = "13 75-79"  
14 = "14 80-84"  
15 = "15 85-89"  
16 = "16 90 +";
```

```
VALUE W200009W
```

```
-7 = '-7 RF'  
-8 = '-8 DK'  
-1 = '-1 Inapplicable'  
-9 = '-9 Missing'  
1 = "1 SAMPLE PERSON"  
2 = "2 SPOUSE/ PARTNER"  
3 = "3 DAUGHTER"  
4 = "4 SON"  
5 = "5 DAUGHTER-IN-LAW"  
6 = "6 SON-IN-LAW"  
7 = "7 STEPDAUGHTER"  
8 = "8 STEPSON"  
9 = "9 SISTER"  
10 = "10 BROTHER"  
11 = "11 SISTER-IN-LAW"  
12 = "12 BROTHER-IN-LAW"  
13 = "13 MOTHER"  
14 = "14 STEPMOTHER"  
15 = "15 MOTHER-IN-LAW"  
16 = "16 FATHER"
```

## SAS ALGORITHM FOR DEMENTIA

```
17 = "17 STEPFATHER"  
18 = "18 FATHER-IN-LAW"  
19 = "19 GRANDDAUGHTER"  
20 = "20 GRANDSON"  
21 = "21 NIECE"  
22 = "22 NEPHEW"  
23 = "23 AUNT"  
24 = "24 UNCLE"  
25 = "25 COUSIN"  
26 = "26 STEPDAUGHTER'S SON/ DAUGHTER"  
27 = "27 STEPSON'S SON/ DAUGHTER"  
28 = "28 DAUGHTER-IN-LAW'S SON/ DAUGHTER"  
29 = "29 SON-IN-LAW'S SON/ DAUGHTER"  
30 = "30 BOARDER/RENTER"  
31 = "31 PAID AIDE/ HOUSEKEEPER/ EMPLOYEE"  
32 = "32 ROOMMATE"  
33 = "33 EX-WIFE/ EX-HUSBAND"  
34 = "34 BOYFRIEND/ GIRLFRIEND"  
35 = "35 NEIGHBOR"  
36 = "36 FRIEND"  
37 = "37 SOMEONE/SERVICE AT THE PLACE SP LIVES/LIVED"  
38 = "38 CO-WORKER"  
39 = "39 MINISTER, PRIEST, OR OTHER CLERGY"  
40 = "40 PSYCHIATRIST, PSYCHOLOGIST, COUNSELOR, OR THERAPIST"  
41 = "41 DECEASED SPOUSE/PARTNER"  
91 = "91 OTHER RELATIVE"  
92 = "92 OTHER NONRELATIVE" ;
```

```
VALUE W200002W
```

```
-7 = '-7 RF'  
-8 = '-8 DK'  
-1 = '-1 Inapplicable'  
-9 = '-9 Missing'  
1 = "1 MALE"  
2 = "2 FEMALE";
```

```
VALUE W200005W
```

```
-7 = '-7 RF'  
-8 = '-8 DK'  
-1 = '-1 Inapplicable'  
-9 = '-9 Missing'  
1 = "1 NO SCHOOLING COMPLETED"  
2 = "2 1ST-8TH GRADE"  
3 = "3 9TH-12TH GRADE (NO DIPLOMA)"  
4 = "4 HIGH SCHOOL GRADUATE (HIGH SCHOOL DIPLOMA OR EQUIVALENT)"  
5 = "5 VOCATIONAL, TECHNICAL, BUSINESS, OR TRADE SCHOOL CERTIFICATE OR  
DIPLOMA (BEYOND HIGH SCHOOL LEVEL)"  
6 = "6 SOME COLLEGE BUT NO DEGREE"  
7 = "7 ASSOCIATE'S DEGREE"  
8 = "8 BACHELOR'S DEGREE"  
9 = "9 MASTER'S, PROFESSIONAL, OR DOCTORAL DEGREE" ;
```

```
VALUE W200010W
```

```
-7 = '-7 RF'  
-8 = '-8 DK'  
-1 = '-1 Inapplicable'  
-9 = '-9 Missing'
```



## SAS ALGORITHM FOR DEMENTIA

```
1 = "1 MARRIED"  
2 = "2 LIVING WITH A PARTNER"  
3 = "3 SEPARATED"  
4 = "4 DIVORCED"  
5 = "5 WIDOWED"  
6 = "6 NEVER MARRIED";
```

```
VALUE W200011W
```

```
-7 = '-7 RF'  
-8 = '-8 DK'  
-1 = '-1 Inapplicable'  
-9 = '-9 Missing'  
1 = "1 YES"  
2 = "2 NO"  
7 = "7 PREVIOUSLY REPORTED" ;
```

```
VALUE W200012W
```

```
-7 = '-7 RF'  
-8 = '-8 DK'  
-1 = '-1 Inapplicable'  
-9 = '-9 Missing'  
1 = "1 REGULAR"  
2 = "2 VARIED" ;
```

```
VALUE W200013W
```

```
-7 = '-7 RF'  
-8 = '-8 DK'  
-1 = '-1 Inapplicable'  
-9 = '-9 Missing'  
1 = "1 SP AND/OR FAMILY"  
2 = "2 GOVERNMENT PROGRAM"  
3 = "3 INSURANCE"  
91 = "91 OTHER (SPECIFY)" ;
```

```
VALUE W200015W
```

```
-7 = '-7 RF'  
-8 = '-8 DK'  
-1 = '-1 Inapplicable'  
-9 = '-9 Missing'  
1='1 HOURLY'  
2='2 WEEKLY'  
3='3 MONTHLY'  
4='4 DID NOT PAY IN LAST MONTH'  
91 = "91 OTHER (SPECIFY)" ;
```

```
VALUE W200016W
```

```
-7 = '-7 RF'  
-8 = '-8 DK'  
-1 = '-1 Inapplicable'  
-9 = '-9 Missing'  
1 = "1 MEDICAID"  
2 = "2 MEDICARE"  
3 = "3 STATE PROGRAM"  
91 = "91 OTHER (SPECIFY)" ;
```

```
VALUE W200018W
```

```
-7 = '-7 RF'  
-8 = '-8 DK'
```

## SAS ALGORITHM FOR DEMENTIA

```
-1 = '-1 Inapplicable'  
-9 = '-9 Missing'  
1 = "1 FREE-STANDING (DETACHED) SINGLE HOUSE"  
2 = "2 SINGLE HOUSE BUT ATTACHED TO OTHERS (ROW HOUSE, TOWNHOUSE, DUPLEX,  
TRIPLEX, OR TRIPLE DECKER)"  
3 = "3 MOBILE HOME OR TRAILER"  
4 = "4 MULTI-UNIT (2+) BUILDING"  
91 = "91 OTHER (SPECIFY)" ;
```

VALUE W200020W

```
-7 = '-7 RF'  
-8 = '-8 DK'  
-1 = '-1 Inapplicable'  
-9 = '-9 Missing'  
1 = "1 HOME"  
2 = "2 MULTI-UNIT"  
3 = "3 OTHER" ;
```

VALUE W200021W

```
-7 = '-7 RF'  
-8 = '-8 DK'  
-1 = '-1 Inapplicable'  
-9 = '-9 Missing'  
1 = "1 BUILDING HAS ONE FLOOR"  
2 = "2 BUILDING HAS MULTIPLE FLOORS" ;
```

VALUE W200022W

```
-7 = '-7 RF'  
-8 = '-8 DK'  
-1 = '-1 Inapplicable'  
-9 = '-9 Missing'  
1 = "1 HOME"  
2 = "2 APARTMENT"  
3 = "3 ROOM"  
4 = "4 UNIT"  
5 = "5 SUITE"  
6 = "6 SOMETHING ELSE (SPECIFY)" ;
```

VALUE W200030W

```
-7 = '-7 RF'  
-8 = '-8 DK'  
-1 = '-1 Inapplicable'  
-9 = '-9 Missing'  
1 = "1 SAMPLE PERSON (SP)"  
2 = "2 PROXY" ;
```

VALUE W200032W

```
-7 = '-7 RF'  
-8 = '-8 DK'  
-1 = '-1 Inapplicable'  
-9 = '-9 Missing'  
1 = "1 HOSPITAL"  
2 = "2 NURSING HOME/REHAB CENTER"  
91 = "91 OTHER (SPECIFY)" ;
```

VALUE W200035W

```
-1 = '-1 Inapplicable'
```

## SAS ALGORITHM FOR DEMENTIA

```
-9 = '-9 Missing'  
1 = "1 SELF"  
2 = "2 SPOUSE/ PARTNER"  
3 = "3 DAUGHTER"  
4 = "4 SON"  
5 = "5 DAUGHTER-IN-LAW"  
6 = "6 SON-IN-LAW"  
7 = "7 STEPDAUGHTER"  
8 = "8 STEPSON"  
9 = "9 SISTER"  
10 = "10 BROTHER"  
11 = "11 SISTER-IN-LAW"  
12 = "12 BROTHER-IN-LAW"  
13 = "13 MOTHER"  
14 = "14 STEPMOTHER"  
15 = "15 MOTHER-IN-LAW"  
16 = "16 FATHER"  
17 = "17 STEPFATHER"  
18 = "18 FATHER-IN-LAW"  
19 = "19 GRANDDAUGHTER"  
20 = "20 GRANDSON"  
21 = "21 NIECE"  
22 = "22 NEPHEW"  
23 = "23 AUNT"  
24 = "24 UNCLE"  
25 = "25 COUSIN"  
26 = "26 STEPDAUGHTER'S SON/ DAUGHTER"  
27 = "27 STEPSON'S SON/ DAUGHTER"  
28 = "28 DAUGHTER-IN-LAW'S SON/ DAUGHTER"  
29 = "29 SON-IN-LAW'S SON/ DAUGHTER"  
30 = "30 BOARDER/RENTER"  
31 = "31 PAID AIDE/ HOUSEKEEPER/ EMPLOYEE"  
32 = "32 ROOMMATE"  
33 = "33 EX-WIFE/ EX-HUSBAND"  
34 = "34 BOYFRIEND/ GIRLFRIEND"  
35 = "35 NEIGHBOR"  
36 = "36 FRIEND"  
37 = "37 SOMEONE/SERVICE FROM THE PLACE SP LIVES/DIED"  
38 = "38 CO-WORKER"  
39 = "39 MINISTER, PRIEST, OR OTHER CLERGY"  
40 = "40 PSYCHIATRIST, PSYCHOLOGIST, COUNSELOR, OR THERAPIST"  
91 = "91 OTHER RELATIVE"  
92 = "92 OTHER NONRELATIVE" ;
```

VALUE W200036W

```
-7 = '-7 RF'  
-8 = '-8 DK'  
-1 = '-1 Inapplicable'  
-9 = '-9 Missing'  
1 = "1 VERY FAMILIAR"  
2 = "2 SOMEWHAT FAMILIAR"  
3 = "3 A LITTLE FAMILIAR"  
4 = "4 NOT AT ALL FAMILIAR" ;
```

VALUE W200037W

```
-7 = '-7 RF'  
-8 = '-8 DK'
```

## SAS ALGORITHM FOR DEMENTIA

```
-1 = '-1 Inapplicable'  
-9 = '-9 Missing'  
1 = "1 YES, SAME ADDRESS"  
2 = "2 NO, DIFFERENT ADDRESS"  
3 = "3 YES, SAME ADDRESS WITH MINOR CORRECTIONS" ;
```

VALUE W200038W

```
-7 = '-7 RF'  
-8 = '-8 DK'  
-1 = '-1 Inapplicable'  
-9 = '-9 Missing'  
1 = "1 JANUARY"  
2 = "2 FEBRUARY"  
3 = "3 MARCH"  
4 = "4 APRIL"  
5 = "5 MAY"  
6 = "6 JUNE"  
7 = "7 JULY"  
8 = "8 AUGUST"  
9 = "9 SEPTEMBER"  
10 = "10 OCTOBER"  
11 = "11 NOVEMBER"  
12 = "12 DECEMBER" ;
```

VALUE W200039W

```
-7 = '-7 RF'  
-8 = '-8 DK'  
-1 = '-1 Inapplicable'  
-9 = '-9 Missing'  
1 = "1 2011"  
2 = "2 2012"  
3 = "3 YEAR2013"  
4 = "4 YEAR2014"  
5 = "5 YEAR2015"  
6 = "6 YEAR2016"  
7 = "7 YEAR2017"  
8 = "8 YEAR2018"  
9 = "9 YEAR2019"  
10 = "10 YEAR2020" ;
```

VALUE W200040W

```
-7 = '-7 RF'  
-8 = '-8 DK'  
-1 = '-1 Inapplicable'  
-9 = '-9 Missing'  
1 = "1 2011"  
2 = "2 2012" ;
```

VALUE W200041W

```
-7 = '-7 RF'  
-8 = '-8 DK'  
-1 = '-1 Inapplicable'  
-9 = '-9 Missing'  
1 = "1 AT SPS OR SOMEONE ELSE'S HOME"  
2 = "2 IN A HOSPITAL"  
3 = "3 IN A NURSING HOME"  
4 = "4 IN A HOSPICE RESIDENCE"
```

## SAS ALGORITHM FOR DEMENTIA

```
5 = "5 IN TRANSIT (AMBULANCE TO HOSPITAL)"  
91 = "91 SOMEWHERE ELSE (SPECIFY)";
```

```
VALUE W200042W  
-7 = '-7 RF'  
-8 = '-8 DK'  
-1 = '-1 Inapplicable'  
-9 = '-9 Missing'  
1 = "1 SP'S HOME"  
2 = "2 SOMEONE ELSE'S HOME" ;
```

```
VALUE W200043W  
-7 = '-7 RF'  
-8 = '-8 DK'  
-1 = '-1 Inapplicable'  
-9 = '-9 Missing'  
1 = "1 INTENSIVE CARE UNIT"  
2 = "2 PALLIATIVE CARE UNIT"  
3 = "3 INPATIENT HOSPICE UNIT"  
4 = "4 EMERGENCY ROOM"  
5 = "5 ANOTHER KIND OF UNIT" ;
```

```
VALUE W200044W  
-7 = '-7 RF'  
-8 = '-8 DK'  
-1 = '-1 Inapplicable'  
-9 = '-9 Missing'  
1 = "1 HOSPICE AT A HOSPITAL"  
2 = "2 HOSPICE AT A NURSING HOME"  
3 = "3 RESIDENTIAL HOSPICE"  
4 = "4 OTHER HOSPICE" ;
```

```
VALUE W200045W  
-7 = '-7 RF'  
-8 = '-8 DK'  
-1 = '-1 Inapplicable'  
-9 = '-9 Missing'  
1 = "1 DAYS"  
2 = "2 WEEKS"  
3 = "3 MONTHS"  
4 = "4 YEARS" ;
```

```
VALUE W200046W  
-7 = '-7 RF'  
-8 = '-8 DK'  
-1 = '-1 Inapplicable'  
-9 = '-9 Missing'  
1 = "1 AT SP'S HOME"  
2 = "2 IN A HOSPITAL"  
3 = "3 IN A NURSING HOME"  
4 = "4 IN A HOSPICE RESIDENCE"  
91 = "91 SOMEWHERE ELSE (SPECIFY)" ;
```

```
VALUE W200047W  
-7 = '-7 RF'  
-8 = '-8 DK'  
-1 = '-1 Inapplicable'
```

## SAS ALGORITHM FOR DEMENTIA

```
-9 = '-9 Missing'  
1 = "1 EVERY DAY"  
2 = "2 MOST DAYS"  
3 = "3 SOME DAYS"  
4 = "4 RARELY"  
5 = "5 NOT AT ALL" ;
```

VALUE W200048W

```
-7 = '-7 RF'  
-8 = '-8 DK'  
-1 = '-1 Inapplicable'  
-9 = '-9 Missing'  
1 = "1 LESS THAN WAS NEEDED"  
2 = "2 MORE THAN WAS NEEDED"  
3 = "3 ABOUT RIGHT AMOUNT" ;
```

VALUE W200049W

```
-7 = '-7 RF'  
-8 = '-8 DK'  
-1 = '-1 Inapplicable'  
-9 = '-9 Missing'  
1 = "1 YES"  
2 = "2 NO"  
3 = "3 DOES NOT APPLY/NO CARE IN LAST MONTH OF LIFE" ;
```

VALUE W200050W

```
-7 = '-7 RF'  
-8 = '-8 DK'  
-1 = '-1 Inapplicable'  
-9 = '-9 Missing'  
1 = "1 ALWAYS"  
2 = "2 USUALLY"  
3 = "3 SOMETIMES"  
4 = "4 NEVER"  
5 = "5 DOES NOT APPLY/NO CARE IN LAST MONTH OF LIFE" ;
```

VALUE W200051W

```
-7 = '-7 RF'  
-8 = '-8 DK'  
-1 = '-1 Inapplicable'  
-9 = '-9 Missing'  
1 = "1 EXCELLENT"  
2 = "2 VERY GOOD"  
3 = "3 GOOD"  
4 = "4 FAIR"  
5 = "5 POOR" ;
```

VALUE W200052W

```
-7 = '-7 RF'  
-8 = '-8 DK'  
-1 = '-1 Inapplicable'  
-9 = '-9 Missing'  
1 = "1 NOT AT ALL"  
2 = "2 SEVERAL DAYS"  
3 = "3 MORE THAN HALF THE DAYS"  
4 = "4 NEARLY EVERY DAY" ;
```

## SAS ALGORITHM FOR DEMENTIA

VALUE W200053W

-7 = '-7 RF'  
-8 = '-8 DK'  
-1 = '-1 Inapplicable'  
-9 = '-9 Missing'  
1 = "1 EVERY NIGHT (7 NIGHTS A WEEK)"  
2 = "2 MOST NIGHTS (5-6 NIGHTS A WEEK)"  
3 = "3 SOME NIGHTS (2-4 NIGHTS A WEEK)"  
4 = "4 RARELY (ONCE A WEEK OR LESS)"  
5 = "5 NEVER" ;

VALUE W200054W

-7 = '-7 RF'  
-8 = '-8 DK'  
-1 = '-1 Inapplicable'  
-9 = '-9 Missing'  
1 = "1 EVERY NIGHT (7 NIGHTS A WEEK)"  
2 = "2 MOST NIGHTS (5-6 NIGHTS A WEEK)"  
3 = "3 SOME NIGHTS (2-4 NIGHTS A WEEK)"  
4 = "4 RARELY (ONCE A WEEK OR LESS)"  
5 = "5 NEVER"  
7 = "7 DON'T WAKE UP/NOT A PROBLEM" ;

VALUE W200055W

-7 = '-7 RF'  
-8 = '-8 DK'  
-1 = '-1 Inapplicable'  
-9 = '-9 Missing'  
1 = "1 PRIVATE RESIDENCE"  
2 = "2 A GROUP HOME, BOARD AND CARE, OR SUPERVISED HOUSING"  
3 = "3 ASSISTED LIVING FACILITY OR CONTINUING CARE RETIREMENT COMMUNITY (CCRC)"  
4 = "4 RELIGIOUS GROUP QUARTERS"  
91 = "91 OTHER (SPECIFY)" ;

VALUE W200056W

-7 = '-7 RF'  
-8 = '-8 DK'  
-1 = '-1 Inapplicable'  
-9 = '-9 Missing'  
1 = "1 YES"  
2 = "2 NO"  
7 = "7 PLACE DOES NOT HAVE A NAME" ;

VALUE W200057W

-7 = '-7 RF'  
-8 = '-8 DK'  
-1 = '-1 Inapplicable'  
-9 = '-9 Missing'  
1 = "1 APARTMENT"  
2 = "2 ROOM"  
3 = "3 UNIT"  
4 = "4 SUITE"  
91 = "91 SOMETHING ELSE (SPECIFY)" ;

VALUE W200058W

-7 = '-7 RF'

## SAS ALGORITHM FOR DEMENTIA

```
-8 = '-8 DK'  
-1 = '-1 Inapplicable'  
-9 = '-9 Missing'  
1 = "1 YES"  
2 = "2 NO, DIFFERENT PERSON"  
3 = "3 NO, NAME MISPELLED" ;
```

```
VALUE W200060W  
-7 = '-7 RF'  
-8 = '-8 DK'  
-1 = '-1 Inapplicable'  
-9 = '-9 Missing'  
1 = "1 PRIVATE RESIDENCE"  
2 = "2 A GROUP HOME, BOARD AND CARE, OR SUPERVISED HOUSING"  
3 = "3 ASSISTED LIVING FACILITY OR CONTINUING CARE RETIREMENT COMMUNITY  
(CCRC)"  
5 = "5 NURSING HOME"  
91 = "91 OTHER (SPECIFY)" ;
```

```
VALUE W200061W  
-7 = '-7 RF'  
-8 = '-8 DK'  
-1 = '-1 Inapplicable'  
-9 = '-9 Missing'  
1 = "1 SEPARATION OR DIVORCE"  
2 = "2 DECEASED"  
3 = "3 MOVED ELSEWHERE"  
5 = "5 LAST INTERVIEW INFORMATION INCORRECT"  
8 = "8 OTHER REASON" ;
```

```
VALUE W200067W  
-7 = '-7 RF'  
-8 = '-8 DK'  
-1 = '-1 Inapplicable'  
-9 = '-9 Missing'  
1 = "1 COMMON OR SHARED ENTRANCE"  
2 = "2 ENTRANCE DIRECTLY INTO HOME" ;
```

```
VALUE W200068W  
-7 = '-7 RF'  
-8 = '-8 DK'  
-1 = '-1 Inapplicable'  
-9 = '-9 Missing'  
1 = "1"  
2 = "2"  
3 = "3"  
4 = "4+" ;
```

```
VALUE W200069W  
-7 = '-7 RF'  
-8 = '-8 DK'  
-1 = '-1 Inapplicable'  
-9 = '-9 Missing'  
1 = "1 ALL ITEMS HERE"  
2 = "2 ADDED ONE OR MORE ITEMS" ;
```

```
VALUE W200070W
```



## SAS ALGORITHM FOR DEMENTIA

```
-7 = '-7 RF'  
-8 = '-8 DK'  
-1 = '-1 Inapplicable'  
-9 = '-9 Missing'  
1 = "1 MORE THAN $500"  
2 = "2 LESS THAN $500"  
3 = "3 JUST ABOUT $500" ;
```

VALUE W200071W

```
-7 = '-7 RF'  
-8 = '-8 DK'  
-1 = '-1 Inapplicable'  
-9 = '-9 Missing'  
1 = "1 MORE THAN $1,000"  
2 = "2 LESS THAN $1,000"  
3 = "3 JUST ABOUT $1,000" ;
```

VALUE W200072W

```
-7 = '-7 RF'  
-8 = '-8 DK'  
-1 = '-1 Inapplicable'  
-9 = '-9 Missing'  
1 = "1 MORE THAN $100"  
2 = "2 LESS THAN $100"  
3 = "3 JUST ABOUT $100" ;
```

VALUE W200073W

```
-7 = '-7 RF'  
-8 = '-8 DK'  
-1 = '-1 Inapplicable'  
-9 = '-9 Missing'  
1 = "1 YES"  
2 = "2 NO"  
7 = "7 YES, DOESNT KNOW HOW TO USE A COMPUTER" ;
```

VALUE W200074W

```
-7 = '-7 RF'  
-8 = '-8 DK'  
-1 = '-1 Inapplicable'  
-9 = '-9 Missing'  
1 = "1 MOST DAYS"  
2 = "2 SOME DAYS"  
3 = "3 RARELY" ;
```

VALUE W200076W

```
-7 = '-7 RF'  
-8 = '-8 DK'  
-1 = '-1 Inapplicable'  
-9 = '-9 Missing'  
1 = "1 YES"  
2 = "2 NO"  
7 = "7 DEAF" ;
```

VALUE W200077W

```
-7 = '-7 RF'  
-8 = '-8 DK'  
-1 = '-1 Inapplicable'
```

## SAS ALGORITHM FOR DEMENTIA

```
-9 = '-9 Missing'  
1 = "1 YES"  
2 = "2 NO"  
7 = "7 BLIND" ;
```

VALUE W200078W

```
-7 = '-7 RF'  
-8 = '-8 DK'  
-1 = '-1 Inapplicable'  
-9 = '-9 Missing'  
1 = "1 EVERY DAY (7 DAYS A WEEK)"  
2 = "2 MOST DAYS (5-6 DAYS A WEEK)"  
3 = "3 SOME DAYS (2-4 DAYS A WEEK)"  
4 = "4 RARELY (ONCE A WEEK OR LESS)"  
5 = "5 NEVER" ;
```

VALUE W200080W

```
-7 = '-7 RF'  
-8 = '-8 DK'  
-1 = '-1 Inapplicable'  
-9 = '-9 Missing'  
1 = "1 YES, A CHANGE"  
2 = "2 NO, NO CHANGE"  
3 = "3 DEMENTIA/ALZHEIMER'S REPORTED BY PROXY" ;
```

VALUE W200081W

```
-7 = '-7 RF'  
-8 = '-8 DK'  
-1 = '-1 Inapplicable'  
-9 = '-9 Missing'  
1 = "1 SP HAS DEMENTIA/ALZHEIMER'S/ NOT ABLE"  
2 = "2 SP IS UNABLE TO SPEAK"  
3 = "3 SP IS UNABLE TO HEAR"  
4 = "4 SP REFUSED"  
5 = "5 PROXY REFUSED"  
6 = "6 SP NOT PRESENT"  
7 = "7 SP TOO ILL"  
8 = "8 SP LANGUAGE BARRIER"  
91 = "91 OTHER (SPECIFY)" ;
```

VALUE W200082W

```
-7 = '-7 RF'  
-8 = '-8 DK'  
-1 = '-1 Inapplicable'  
-9 = '-9 Missing'  
1 = "1 MUCH BETTER"  
2 = "2 BETTER"  
3 = "3 SAME"  
4 = "4 WORSE"  
5 = "5 MUCH WORSE" ;
```

VALUE W200083W

```
-7 = '-7 RF'  
-8 = '-8 DK'  
-1 = '-1 Inapplicable'  
-9 = '-9 Missing'  
1 = "1 YES"
```

## SAS ALGORITHM FOR DEMENTIA

```
2 = "2 NO/DON'T KNOW" ;

VALUE W200084W
-7 = '-7 RF'
-8 = '-8 DK'
-1 = '-1 Inapplicable'
-9 = '-9 Missing'
1 = "1 CONTINUE WITH ACTIVITY"
2 = "2 SP REFUSES ACTIVITY" ;

VALUE W200085W
-1 = '-1 Inapplicable'
-9 = '-9 Missing'
1 = "Word[1]"
2 = "Word[2]"
3 = "Word[3]"
4 = "Word[4]"
5 = "Word[5]"
6 = "Word[6]"
7 = "Word[7]"
8 = "Word[8]"
9 = "Word[9]"
10 = "Word[10]"
91 = "91 NO WORDS REMEMBERED"
92 = "92 REFUSED" ;

VALUE W200086W
-7 = '-7 RF'
-8 = '-8 DK'
-1 = '-1 Inapplicable'
-9 = '-9 Missing'
1 = "1 DIFFICULTY HEARING ANY OF THE WORDS"
2 = "2 INTERRUPTION OCCURRED WHILE LIST WAS BEING READ"
91 = "91 OTHER PROBLEM (SPECIFY)"
92 = "92 NO PROBLEMS OCCURRED"
97 = "97 SP REFUSED WORD RECALL TASK" ;

VALUE W200087W
-1 = '-1 Inapplicable'
-9 = '-9 Missing'
1 = "1 SP ATTEMPTED CLOCK DRAWING"
2 = "2 SP DID NOT ATTEMPT CLOCK DRAWING"
97 = "3 SP REFUSED CLOCK DRAWING" ;

VALUE W200089W
-7 = '-7 RF'
-8 = '-8 DK'
-1 = '-1 Inapplicable'
-9 = '-9 Missing'
1 = "1 EVERY DAY (7 DAYS A WEEK)"
2 = "2 MOST DAYS (5-6 DAYS A WEEK)"
3 = "3 SOME DAYS (2-4 DAYS A WEEK)"
4 = "4 RARELY (ONCE A WEEK OR LESS)"
5 = "5 NEVER" ;

VALUE W200090W
-7 = '-7 RF'
```

## SAS ALGORITHM FOR DEMENTIA

```
-8 = '-8 DK'  
-1 = '-1 Inapplicable'  
-9 = '-9 Missing'  
1 = "1 EVERY TIME"  
2 = "2 MOST TIMES"  
3 = "3 SOMETIMES"  
4 = "4 RARELY"  
5 = "5 NEVER" ;
```

```
VALUE W200092W
```

```
-7 = '-7 RF'  
-8 = '-8 DK'  
-1 = '-1 Inapplicable'  
-9 = '-9 Missing'  
1 = "1 MOST TIMES"  
2 = "2 SOMETIMES"  
3 = "3 RARELY"  
4 = "4 NEVER" ;
```

```
VALUE W200093W
```

```
-7 = '-7 RF'  
-8 = '-8 DK'  
-1 = '-1 Inapplicable'  
-9 = '-9 Missing'  
1 = "1 NONE"  
2 = "2 A LITTLE"  
3 = "3 SOME"  
4 = "4 A LOT" ;
```

```
VALUE W200094W
```

```
-7 = '-7 RF'  
-8 = '-8 DK'  
-1 = '-1 Inapplicable'  
-9 = '-9 Missing'  
1 = "1 MORE OFTEN"  
2 = "2 LESS OFTEN"  
3 = "3 ABOUT THE SAME" ;
```

```
VALUE W200095W
```

```
-7 = '-7 RF'  
-8 = '-8 DK'  
-1 = '-1 Inapplicable'  
-9 = '-9 Missing'  
1 = "1 JANUARY"  
2 = "2 FEBRUARY"  
3 = "3 MARCH"  
4 = "4 APRIL"  
5 = "5 MAY"  
6 = "6 JUNE"  
7 = "7 JULY"  
8 = "8 AUGUST"  
9 = "9 SEPTEMBER"  
10 = "10 OCTOBER"  
11 = "11 NOVEMBER"  
12 = "12 DECEMBER"  
90 = "90 LAST INTERVIEW INFORMATION INCORRECT" ;
```

## SAS ALGORITHM FOR DEMENTIA

```
VALUE W200096W
-7 = '-7 RF'
-8 = '-8 DK'
-1 = '-1 Inapplicable'
-9 = '-9 Missing'
1 = "1 YES"
2 = "2 NO"
90 = "90 LAST INTERVIEW INFORMATION INCORRECT" ;
```

```
VALUE W200097W
-7 = '-7 RF'
-8 = '-8 DK'
-1 = '-1 Inapplicable'
-9 = '-9 Missing'
1 = "1 YES"
2 = "2 NO / NO LONGER DRIVE" ;
```

```
VALUE W200098W
-7 = '-7 RF'
-8 = '-8 DK'
-1 = '-1 Inapplicable'
-9 = '-9 Missing'
1 = "1 YES"
2 = "2 NO"
7 = "7 NO, NO RAIN OR BAD WEATHER" ;
```

```
VALUE W200099W
-7 = '-7 RF'
-8 = '-8 DK'
-1 = '-1 Inapplicable'
-9 = '-9 Missing'
1 = "1 ALWAYS DID IT BY SELF"
2 = "2 ALWAYS DID IT TOGETHER WITH SOMEONE ELSE"
3 = "3 SOMEONE ELSE ALWAYS DID IT"
4 = "4 IT VARIED (MORE THAN ONE WAY)"
5 = "5 NOT DONE IN LAST MONTH" ;
```

```
VALUE W200102W
-7 = '-7 RF'
-8 = '-8 DK'
-1 = '-1 Inapplicable'
-9 = '-9 Missing'
1 = "1 MORE OFTEN"
2 = "2 LESS OFTEN"
3 = "3 SAME" ;
```

```
VALUE W200106W
-7 = '-7 RF'
-8 = '-8 DK'
-1 = '-1 Inapplicable'
-9 = '-9 Missing'
1 = "1 YES"
2 = "2 NO"
7 = "7 ALWAYS FED THROUGH IV OR TUBE" ;
```

```
VALUE W200107W
-7 = '-7 RF'
```

## SAS ALGORITHM FOR DEMENTIA

```
-8 = '-8 DK'  
-1 = '-1 Inapplicable'  
-9 = '-9 Missing'  
1 = "1 EVERY TIME"  
2 = "2 MOST TIMES"  
3 = "3 SOMETIMES"  
4 = "4 RARELY" ;
```

VALUE W200109W

```
-7 = '-7 RF'  
-8 = '-8 DK'  
-1 = '-1 Inapplicable'  
-9 = '-9 Missing'  
1 = "1 SHOWERING"  
2 = "2 TAKING BATHS"  
3 = "3 WASHING UP SOME OTHER WAY" ;
```

VALUE W200114W

```
-7 = '-7 RF'  
-8 = '-8 DK'  
-1 = '-1 Inapplicable'  
-9 = '-9 Missing'  
1 = "1 VERY IMPORTANT"  
2 = "2 SOMEWHAT IMPORTANT"  
3 = "3 NOT SO IMPORTANT" ;
```

VALUE W200115W

```
-7 = '-7 RF'  
-8 = '-8 DK'  
-1 = '-1 Inapplicable'  
-9 = '-9 Missing'  
1 = "1 YES"  
2 = "2 NO"  
95 = "95 NO ACTIVITY LISTED" ;
```

VALUE W200116W

```
-7 = '-7 RF'  
-8 = '-8 DK'  
-1 = '-1 Inapplicable'  
-9 = '-9 Missing'  
1 = "1 LEFT"  
2 = "2 RIGHT"  
3 = "3 BOTH" ;
```

VALUE W200117W

```
-7 = '-7 RF'  
-8 = '-8 DK'  
-1 = '-1 Inapplicable'  
-9 = '-9 Missing'  
1 = "1 LEFT SIDE"  
2 = "2 RIGHT SIDE"  
3 = "3 BOTH SIDES" ;
```

VALUE W200118W

```
-7 = '-7 RF'  
-8 = '-8 DK'
```

## SAS ALGORITHM FOR DEMENTIA

```
-1 = '-1 Inapplicable'  
-9 = '-9 Missing'  
1 = "1 ONE SIDE"  
2 = "2 BOTH SIDES" ;
```

```
VALUE W200119W  
-7 = '-7 RF'  
-8 = '-8 DK'  
-1 = '-1 Inapplicable'  
-9 = '-9 Missing'  
1 = "1 RECEIVE ALL TREATMENTS"  
2 = "2 STOP/REJECT ALL TREATMENTS" ;
```

```
VALUE W200120W  
-7 = '-7 RF'  
-8 = '-8 DK'  
-1 = '-1 Inapplicable'  
-9 = '-9 Missing'  
1 = "1 LIVING IN THEIR OWN HOME WITH HELP FROM FRIENDS AND FAMILY"  
2 = "2 LIVING IN THEIR OWN HOME WITH HELP FROM SOMEONE PAID TO COME IN"  
3 = "3 LIVING WITH AN ADULT CHILD"  
4 = "4 LIVING IN AN ASSISTED LIVING FACILITY OR CONTINUING CARE  
RESIDENCE"  
5 = "5 LIVING IN A NURSING HOME" ;
```

```
VALUE W200121W  
-7 = '-7 RF'  
-8 = '-8 DK'  
-1 = '-1 Inapplicable'  
-9 = '-9 Missing'  
1 = "1 YES"  
2 = "2 NO"  
3 = "3 DOESNT HAVE ANY MONEY TO PAY A CAREGIVER"  
4 = "4 WOULD NOT USE A PAID CAREGIVER" ;
```

```
VALUE W200122W  
-7 = '-7 RF'  
-8 = '-8 DK'  
-1 = '-1 Inapplicable'  
-9 = '-9 Missing'  
1 = "1 MAKE DECISIONS WITHOUT MUCH ADVICE FROM THEM"  
2 = "2 GET THEIR ADVICE AND THEN MAKE DECISIONS"  
3 = "3 MAKE DECISIONS TOGETHER"  
4 = "4 LEAVE DECISIONS UP TO THEM" ;
```

```
VALUE W200123W  
-7 = '-7 RF'  
-8 = '-8 DK'  
-1 = '-1 Inapplicable'  
-9 = '-9 Missing'  
1 = "1 HANDLE MOSTLY BY SELF"  
2 = "2 HANDLE TOGETHER WITH FAMILY OR CLOSE FRIENDS"  
3 = "3 FAMILY OR CLOSE FRIENDS MOSTLY HANDLE THESE THINGS"  
4 = "4 IT VARIES" ;
```

```
VALUE W200124W  
-7 = '-7 RF'
```

## SAS ALGORITHM FOR DEMENTIA

```
-8 = '-8 DK'  
-1 = '-1 Inapplicable'  
-9 = '-9 Missing'  
1 = "1 NEVER"  
2 = "2 RARELY"  
3 = "3 SOMETIMES"  
4 = "4 OFTEN" ;
```

```
VALUE W200126W
```

```
-7 = '-7 RF'  
-8 = '-8 DK'  
-1 = '-1 Inapplicable'  
-9 = '-9 Missing'  
1 = "1 AGREE A LOT"  
2 = "2 AGREE A LITTLE"  
3 = "3 DO NOT AGREE" ;
```

```
VALUE W200127W
```

```
-7 = '-7 RF'  
-8 = '-8 DK'  
-1 = '-1 Inapplicable'  
-9 = '-9 Missing'  
1 = "1 AGREE A LOT"  
2 = "2 AGREE A LITTLE"  
3 = "3 AGREE NOT AT ALL" ;
```

```
VALUE W200129W
```

```
-7 = '-7 RF'  
-8 = '-8 DK'  
-1 = '-1 Inapplicable'  
-9 = '-9 Missing'  
1 = "1 less than $1,000,"  
2 = "2 $1,000 to less than $2,000,"  
3 = "3 $2,000 to less than $3,000,"  
4 = "4 $3,000 to less than $5,000, or"  
5 = "5 $5,000 or more?" ;
```

```
VALUE W200131W
```

```
-7 = '-7 RF'  
-8 = '-8 DK'  
-1 = '-1 Inapplicable'  
-9 = '-9 Missing'  
1 = "1 YES"  
2 = "2 NO"  
3 = "3 RETIRED/DON'T WORK ANYMORE" ;
```

```
VALUE W200132W
```

```
-7 = '-7 RF'  
-8 = '-8 DK'  
-1 = '-1 Inapplicable'  
-9 = '-9 Missing'  
1 = "1 EVERY WEEK"  
2 = "2 EVERY TWO WEEKS"  
3 = "3 TWO TIMES A MONTH"  
4 = "4 ONCE A MONTH"  
5 = "5 DAILY"  
91 = "91 OTHER SCHEDULE (SPECIFY)" ;
```



## SAS ALGORITHM FOR DEMENTIA

```
VALUE W200133W
-7 = '-7 RF'
-8 = '-8 DK'
-1 = '-1 Inapplicable'
-9 = '-9 Missing'
 1 = "1 OWN"
 2 = "2 RENT"
 3 = "3 SOME OTHER ARRANGEMENT" ;

VALUE W200134W
-7 = '-7 RF'
-8 = '-8 DK'
-1 = '-1 Inapplicable'
-9 = '-9 Missing'
 1 = "1 PAID OFF"
 2 = "2 STILL MAKE PAYMENTS"
 3 = "3 REVERSE MORTGAGE" ;

VALUE W200135W
-7 = '-7 RF'
-8 = '-8 DK'
-1 = '-1 Inapplicable'
-9 = '-9 Missing'
 1 = "1 less than $250,"
 2 = "2 $250-$499,"
 3 = "3 $500-$999, or"
 4 = "4 $1,000 or more?" ;

VALUE W200136W
-7 = '-7 RF'
-8 = '-8 DK'
-1 = '-1 Inapplicable'
-9 = '-9 Missing'
 1 = "1 5 YEARS"
 2 = "2 10 YEARS"
 3 = "3 LONGER THAN 10 YEARS" ;

VALUE W200137W
-7 = '-7 RF'
-8 = '-8 DK'
-1 = '-1 Inapplicable'
-9 = '-9 Missing'
 1 = "1 less than $50,000,"
 2 = "2 between $50,000 and $100,000, or"
 3 = "3 over $100,000?" ;

VALUE W200138W
-7 = '-7 RF'
-8 = '-8 DK'
-1 = '-1 Inapplicable'
-9 = '-9 Missing'
 1 = "1 less than $50,000,"
 2 = "2 $50,000-$74,999,"
 3 = "3 $75,000-$99,999,"
 4 = "4 $100,000-$199,999,"
 5 = "5 $200,000-$299,999,"
```

## SAS ALGORITHM FOR DEMENTIA

```
6 = "6 $300,000-$499,999,"  
7 = "7 $500,000-$749,999, or"  
8 = "8 $750,000 or more?" ;
```

VALUE W200139W

```
-7 = '-7 RF'  
-8 = '-8 DK'  
-1 = '-1 Inapplicable'  
-9 = '-9 Missing'  
1 = "1 PAY OFF BALANCE"  
2 = "2 PAY MINIMUM"  
3 = "3 PAY MORE THAN MINIMUM, BUT NOT ENTIRE BALANCE"  
4 = "4 DON'T HAVE ANY CREDIT CARDS" ;
```

VALUE W200140W

```
-7 = '-7 RF'  
-8 = '-8 DK'  
-1 = '-1 Inapplicable'  
-9 = '-9 Missing'  
1 = "1 less than $1,000,"  
2 = "2 $1,000 - $1,999,"  
3 = "3 $2,000 - $3,999,"  
4 = "4 $4,000 - $5,999,"  
5 = "5 $6,000 - $9,999,"  
6 = "6 $10,000 - $19,999, or"  
7 = "7 $20,000 or more?" ;
```

VALUE W200141W

```
-7 = '-7 RF'  
-8 = '-8 DK'  
-1 = '-1 Inapplicable'  
-9 = '-9 Missing'  
1 = "1 MOST"  
2 = "2 SOME"  
3 = "3 A LITTLE" ;
```

VALUE W200142W

```
-7 = '-7 RF'  
-8 = '-8 DK'  
-1 = '-1 Inapplicable'  
-9 = '-9 Missing'  
1 = "1 less than $500,"  
2 = "2 $500 - $999,"  
3 = "3 $1,000 - $1,999,"  
4 = "4 $2,000 - $3,999,"  
5 = "5 $4,000 - $5,999,"  
6 = "6 $6,000 - $9,999,"  
7 = "7 $10,000 - $19,999, or"  
8 = "8 $20,000 or more?" ;
```

VALUE W200146W

```
-7 = '-7 RF'  
-8 = '-8 DK'  
-1 = '-1 Inapplicable'  
-9 = '-9 Missing'  
1 = "1 NEARLY EVERY DAY"  
2 = "2 MORE THAN HALF THE DAYS"
```

## SAS ALGORITHM FOR DEMENTIA

```
3 = "3 SEVERAL DAYS (LESS THAN HALF)"  
4 = "4 A FEW DAYS" ;
```

```
VALUE W200147W  
-7 = '-7 RF'  
-8 = '-8 DK'  
-1 = '-1 Inapplicable'  
-9 = '-9 Missing'  
1 = "1 INCLUDED"  
2 = "2 EXTRA CHARGE" ;
```

```
VALUE W200148W  
-7 = '-7 RF'  
-8 = '-8 DK'  
-1 = '-1 Inapplicable'  
-9 = '-9 Missing'  
1 = "1 Yes" ;
```

```
VALUE F200006W  
-7 = '-7 RF'  
-8 = '-8 DK'  
-1 = '-1 Inapplicable'  
-9 = '-9 Missing'  
1 = "1 FREE STANDING NURSING HOME"  
2 = "2 FREE STANDING ASSISTED LIVING FACILITY"  
3 = "3 NURSING HOME AND ASSISTED LIVING FACILITY"  
4 = "4 CONTINUING CARE RETIREMENT COMMUNITY (CCRC)"  
5 = "5 ADULT FAMILY CARE HOME"  
6 = "6 GROUP HOME"  
7 = "7 BOARD AND CARE HOME"  
8 = "8 RETIREMENT COMMUNITY OR SENIOR HOUSING (NOT CCRC)"  
91 = "91 OTHER (SPECIFY)" ;
```

```
VALUE F200007W  
-7 = '-7 RF'  
-8 = '-8 DK'  
-1 = '-1 Inapplicable'  
-9 = '-9 Missing'  
1 = "1 YES"  
2 = "2 NO" ;
```

```
VALUE F200008W  
-7 = '-7 RF'  
-8 = '-8 DK'  
-1 = '-1 Inapplicable'  
-9 = '-9 Missing'  
1 = "1 INDEPENDENT LIVING"  
2 = "2 ASSISTED LIVING"  
3 = "3 SPECIAL CARE, MEMORY CARE, OR ALZHEIMER'S UNIT"  
4 = "4 NURSING HOME"  
91 = "91 OTHER (SPECIFY)" ;
```

```
VALUE F200009W  
-7 = '-7 RF'  
-8 = '-8 DK'  
-1 = '-1 Inapplicable'  
-9 = '-9 Missing'
```

## SAS ALGORITHM FOR DEMENTIA

```
1 = "1 ASSISTED LIVING"  
2 = "2 NURSING HOME" ;
```

```
VALUE F200011W
```

```
-7 = '-7 RF'  
-8 = '-8 DK'  
-1 = '-1 Inapplicable'  
-9 = '-9 Missing'  
1 = "1 YES, SERVICE PROVIDED AS PART OF PACKAGE"  
2 = "2 YES, SERVICE PROVIDED AT AN EXTRA CHARGE"  
3 = "3 NO, SERVICE NOT PROVIDED" ;
```

```
VALUE F200012W
```

```
-7 = '-7 RF'  
-8 = '-8 DK'  
-1 = '-1 Inapplicable'  
-9 = '-9 Missing'  
1 = "1 SP/FAMILY"  
2 = "2 SOCIAL SECURITY/SSI"  
3 = "3 MEDICAID"  
4 = "4 MEDICARE"  
5 = "5 OTHER SOURCE" ;
```

```
VALUE I200002W
```

```
-7 = '-7 RF'  
-8 = '-8 DK'  
-1 = '-1 Inapplicable'  
-9 = '-9 Missing'  
1 = "1 Yes"  
2 = "2 No" ;
```

```
VALUE I200003W
```

```
-7 = '-7 RF'  
-8 = '-8 DK'  
-1 = '-1 Inapplicable'  
-9 = '-9 Missing'  
1 = "1 English"  
2 = "2 Spanish"  
3 = "3 Other (specify)" ;
```

```
VALUE I200005W
```

```
-7 = '-7 RF'  
-8 = '-8 DK'  
-1 = '-1 Inapplicable'  
-9 = '-9 Missing'  
1 = "1 Friendly and interested"  
2 = "2 Cooperative but not particularly interested"  
3 = "3 Impatient and restless"  
4 = "4 Hostile" ;
```

```
VALUE I200006W
```

```
-7 = '-7 RF'  
-8 = '-8 DK'  
-1 = '-1 Inapplicable'  
-9 = '-9 Missing'  
1 = "1 Good"  
2 = "2 Fair"
```

## SAS ALGORITHM FOR DEMENTIA

```
3 = "3 Poor" ;

VALUE I200008W
-7 = '-7 RF'
-8 = '-8 DK'
-1 = '-1 Inapplicable'
-9 = '-9 Missing'
1 = "1 All of the time"
2 = "2 Most of the time"
3 = "3 Some of the time"
4 = "4 Only for the cognition and/or performance parts"
5 = "5 None of the time" ;

VALUE I200010W
-7 = '-7 RF'
-8 = '-8 DK'
-1 = '-1 Inapplicable'
-9 = '-9 Missing'
1 = "1 Yes"
2 = "2 No"
3 = "3 Interview was conducted by telephone" ;

VALUE I200012W
-7 = '-7 RF'
-8 = '-8 DK'
-1 = '-1 Inapplicable'
-9 = '-9 Missing'
1 = "1 Yes"
2 = "2 No"
3 = "3 Not Administered" ;

VALUE I200013W
-7 = '-7 RF'
-8 = '-8 DK'
-1 = '-1 Inapplicable'
-9 = '-9 Missing'
1 = "1 Yes"
2 = "2 No" ;

VALUE I200016W
-7 = '-7 RF'
-8 = '-8 DK'
-1 = '-1 Inapplicable'
-9 = '-9 Missing'
1 = "1 Yes"
2 = "2 No"
3 = "3 Entire interview conducted by telephone" ;

VALUE I200017W
-7 = '-7 RF'
-8 = '-8 DK'
-1 = '-1 Inapplicable'
-9 = '-9 Missing'
1 = "1 Not at all cluttered"
2 = "2 Somewhat cluttered"
3 = "3 Very cluttered"
4 = "4 Could not see other rooms" ;
```

## SAS ALGORITHM FOR DEMENTIA

```
VALUE I200018W
-7 = '-7 RF'
-8 = '-8 DK'
-1 = '-1 Inapplicable'
-9 = '-9 Missing'
1 = "1 None"
2 = "2 A little"
3 = "3 Some"
4 = "4 A lot"
5 = "5 Could not observe" ;
```

```
VALUE I200019W
-7 = '-7 RF'
-8 = '-8 DK'
-1 = '-1 Inapplicable'
-9 = '-9 Missing'
1 = "1 Yes"
2 = "2 No"
7 = "7 Could not observe" ;
```

/\* DERIVED VARIABLE FORMATS \*/

```
VALUE LVGARRG
1 = '1 Alone'
2 = '2 With spouse/partner only (spouse/partner in household]'
3 = '3 With spouse/partner and with others'
4 = '4 With others only'
-1 = '-1 Inapplicable'
-9 = '-9 Missing';
```

```
VALUE DOUTSFDF
8 = '8 Not done in last month'
1 = '1 Did not do by self in last month'
2 = '2 Did by self in last month/No Difficulty'
3 = '3 Did by self in last month/Difficulty'
4 = '4 DKRF Did by self in last month/No Difficulty'
5 = '5 DKRF Did by self in last month/Difficulty'
6 = '6 Did by self in last month/DKRF Difficulty'
7 = '7 DKRF Did by self in last month/DKRF Difficulty'
-1 = '-1 Inapplicable'
-9 = '-9 Missing';
```

```
VALUE DOUTDEVI
8 = '8 Not done in last month'
1 = '1 No use of devices to go outside in last month'
2 = '2 Use of devices to go outside in last month'
3 = '3 DKRF If used devices to go outside in last month'
4 = '4 DKRF If used devices in last month'
-1 = '-1 Inapplicable'
-9 = '-9 Missing';
```

```
VALUE DOUTHELP
8 = '8 Not done in last month'
1 = '1 No help to go outside in last month'
2 = '2 Had help to go outside in last month'
3 = '3 DKRF If had help to go outside in last month'
```

## SAS ALGORITHM FOR DEMENTIA

```
-1 = '-1 Inapplicable'  
-9 = '-9 Missing';
```

### VALUE DINSDFSFD

```
8 = '8 Not done in last month'  
1 = '1 Did not do by self in last month'  
2 = '2 Did by self in last month/No Difficulty'  
3 = '3 Did by self in last month/Difficulty'  
4 = '4 DKRF Did by self in last month/No Difficulty'  
5 = '5 DKRF Did by self in last month/Difficulty'  
6 = '6 Did by self in last month/DKRF Difficulty'  
7 = '7 DKRF Did by self in last month/DKRF Difficulty'  
-1 = '-1 Inapplicable'  
-9 = '-9 Missing';
```

### VALUE DINSDDDEV

```
8 = '8 Not done in last month'  
1 = '1 No use of devices inside in last month'  
2 = '2 Use of devices inside in last month'  
3 = '3 DKRF If used devices inside in last month'  
4 = '4 DKRF On use of devices'  
-1 = '-1 Inapplicable'  
-9 = '-9 Missing';
```

### VALUE dinsdhlp

```
8 = '8 Not done in last month'  
1 = '1 No help to go around inside in last month'  
2 = '2 Had help to go around inside in last month'  
3 = '3 DKRF If had help to go around inside in last month'  
-1 = '-1 Inapplicable'  
-9 = '-9 Missing';
```

### VALUE dbedsdfd

```
1 = '1 Did not do by self in last month'  
2 = '2 Did by self in last month/No Difficulty'  
3 = '3 Did by self in last month/Difficulty'  
4 = '4 DKRF Did by self in last month/No Difficulty'  
5 = '5 DKRF Did by self in last month/Difficulty'  
6 = '6 Did by self in last month/DKRF Difficulty'  
7 = '7 DKRF Did by self in last month/DKRF Difficulty'  
-1 = '-1 Inapplicable'  
-9 = '-9 Missing';
```

### VALUE dbeddevi

```
1 = '1 No use of cane or walker to get out of bed in last month'  
2 = '2 Use of cane or walker to get out of bed in last month'  
3 = '3 DKRF If Used cane or walker to get out of bed in last month'  
4 = '4 DKRF If used cane or walker in last month'  
-1 = '-1 Inapplicable'  
-9 = '-9 Missing';
```

### VALUE dbedhlp

```
1 = '1 No help to get out of bed in last month'  
2 = '2 Had help to get out of bed in last month'  
3 = '3 DKRF If had help to get out of bed in last month'  
-1 = '-1 Inapplicable'  
-9 = '-9 Missing';
```

## SAS ALGORITHM FOR DEMENTIA

VALUE dlaunsfd

```
1 = '1 Did not do by self in last month'  
2 = '2 Did by self in last month/No Difficulty'  
3 = '3 Did by self in last month/Difficulty'  
4 = '4 DKRF Did by self in last month/No Difficulty'  
5 = '5 DKRF Did by self in last month/Difficulty'  
6 = '6 Did by self in last month/DKRF Difficulty'  
7 = '7 DKRF Did by self in last month/DKRF Difficulty'  
8 = '8 Not done in last month'  
-1 = '-1 Inapplicable'  
-9 = '-9 Missing';
```

VALUE dlaunrea

```
1= '1 Health/functioning reason only'  
2= '2 Other reason only'  
3= '3 Both health/functioning and other'  
4= '4 Service/someone from the place SP lives'  
-7 = '-7 RF'  
-8 = '-8 DK'  
-1 = '-1 Inapplicable'  
-9 = '-9 Missing';
```

VALUE dshopsfd

```
1 = '1 Did not do by self in last month'  
2 = '2 Did by self in last month/No Difficulty'  
3 = '3 Did by self in last month/Difficulty'  
4 = '4 DKRF Did by self in last month/No Difficulty'  
5 = '5 DKRF Did by self in last month/Difficulty'  
6 = '6 Did by self in last month/DKRF Difficulty'  
7 = '7 DKRF Did by self in last month/DKRF Difficulty'  
8 = '8 Not done in last month'  
-1 = '-1 Inapplicable'  
-9 = '-9 Missing';
```

VALUE dshoprea

```
1= '1 Health/functioning reason only'  
2= '2 Other reason only'  
3= '3 Both health/functioning and other'  
4= '4 Service/someone from the place SP lives'  
-7 = '-7 RF'  
-8 = '-8 DK'  
-1 = '-1 Inapplicable'  
-9 = '-9 Missing';
```

VALUE dmealsfd

```
1 = '1 Did not do by self in last month'  
2 = '2 Did by self in last month/No Difficulty'  
3 = '3 Did by self in last month/Difficulty'  
4 = '4 DKRF Did by self in last month/No Difficulty'  
5 = '5 DKRF Did by self in last month/Difficulty'  
6 = '6 Did by self in last month/DKRF Difficulty'  
7 = '7 DKRF Did by self in last month/DKRF Difficulty'  
8 = '8 Not done in last month'
```



## SAS ALGORITHM FOR DEMENTIA

```
-1 = '-1 Inapplicable'  
-9 = '-9 Missing';
```

```
VALUE dmealrea  
1= '1 Health/functioning reason only'  
2= '2 Other reason only'  
3= '3 Both health/functioning and other'  
4= '4 Service/someone from the place SP lives'  
-7 = '-7 RF'  
-8 = '-8 DK'  
-1 = '-1 Inapplicable'  
-9 = '-9 Missing';
```

```
VALUE dbanksfd  
1 = '1 Did not do by self in last month'  
2 = '2 Did by self in last month/No Difficulty'  
3 = '3 Did by self in last month/Difficulty'  
4 = '4 DKRF Did by self in last month/No Difficulty'  
5 = '5 DKRF Did by self in last month/Difficulty'  
6 = '6 Did by self in last month/DKRF Difficulty'  
7 = '7 DKRF Did by self in last month/DKRF Difficulty'  
8 = '8 Not done in last month'  
-7 = '-7 RF'  
-8 = '-8 DK'  
-1 = '-1 Inapplicable'  
-9 = '-9 Missing';
```

```
VALUE dbankrea  
1= '1 Health/functioning reason only'  
2= '2 Other reason only'  
3= '3 Both health/functioning and other'  
4= '4 Service/someone from the place SP lives'  
-7 = '-7 RF'  
-8 = '-8 DK'  
-1 = '-1 Inapplicable'  
-9 = '-9 Missing';
```

```
VALUE deatdevi  
1 = '1 No use of adapted utensils in last month'  
2 = '2 Use of adapted utensils in last month'  
8 = '8 Not done in last month'  
3 = '3 DKRF If used adapted utensils in last month'  
-1 = '-1 Inapplicable'  
-9 = '-9 Missing';
```

```
VALUE deathelp  
1 = '1 No help eating in last month'  
2 = '2 Had help eating in last month'  
3 = '3 DKRF If had help eating in last month'  
8 = '8 Not done in last month'  
-1 = '-1 Inapplicable'  
-9 = '-9 Missing';
```

```
VALUE deatsfdf  
1 = '1 Did not do by self in last month'  
2 = '2 No Difficulty by self (and when using utensils)'  
3 = '3 Difficulty by self (and when using utensils)'
```

## SAS ALGORITHM FOR DEMENTIA

```
6 = '6 Did by self in last month/DKRF Difficulty'  
7 = '7 DKRF Did by self in last month/DKRF Difficulty'  
8 = '8 Not done in last month'  
-1 = '-1 Inapplicable'  
-9 = '-9 Missing';
```

### VALUE dbathdev

```
1 = '1 No use of grab bars or bath seats in last month'  
2 = '2 Use of grab bars or bath seats in last month'  
3 = '3 DKRF If use of grab bars or bath seats in last month'  
4 = '4 DKRF If had grab bars or bath seats in last month'  
9 = '9 No bars/seats/shower/tub or washes up other way'  
-1 = '-1 Inapplicable'  
-9 = '-9 Missing';
```

### VALUE dbathhel

```
1 = '1 No help bathing in last month'  
2 = '2 Had help bathing in last month'  
3 = '3 DKRF If had help bathing in last month'  
-1 = '-1 Inapplicable'  
-9 = '-9 Missing';
```

### VALUE dbathsfd

```
1 = '1 Did not do by self in last month'  
2 = '2 No Difficulty by self (and when using grab bars or tub seat)'  
3 = '3 Difficulty by self (and when using grab bars or tub seat)'  
6 = '6 Did by self in last month/DKRF Difficulty'  
7 = '7 DKRF Did by self in last month/DKRF Difficulty'  
-1 = '-1 Inapplicable'  
-9 = '-9 Missing';
```

### VALUE dtoildev

```
1 = '1 No use of toileting devices in last month'  
2 = '2 Use of toileting devices in last month'  
3 = '3 DKRF of some and no use of other toileting devices in last month'  
-1 = '-1 Inapplicable'  
-9 = '-9 Missing';
```

### VALUE dtoilhel

```
1 = '1 No help toileting in last month'  
2 = '2 Had help toileting in last month'  
3 = '3 DKRF If had help toileting in last month'  
-1 = '-1 Inapplicable'  
-9 = '-9 Missing';
```

### VALUE dtoilsfd

```
1 = '1 Did not do by self in last month'  
2 = '2 No Difficulty by self (and when using toileting devices)'  
3 = '3 Difficulty by self (and when using toileting devices)'  
6 = '6 Did by self in last month/DKRF Difficulty'  
7 = '7 DKRF Did by self in last month/DKRF Difficulty'  
-1 = '-1 Inapplicable'  
-9 = '-9 Missing';
```

### VALUE ddresdev

```
8 = '8 Not done in last month'  
9 = '9 DKRF If dressed in last month'
```

## SAS ALGORITHM FOR DEMENTIA

```
2 = '2 Use of dressing devices in last month'  
1 = '1 No use of dressing devices in last month'  
3 = '3 DKRF If use of dressing devices in last month'  
-1 = '-1 Inapplicable'  
-9 = '-9 Missing';
```

### VALUE ddreshel

```
8 = '8 Not done in last month'  
9 = '9 DKRF If dressed in last month'  
1 = '1 No help dressing in last month'  
2 = '2 Had help dressing in last month'  
3 = '3 DKRF If had help dressing in last month'  
-1 = '-1 Inapplicable'  
-9 = '-9 Missing';
```

### VALUE ddressfd

```
1 = '1 Did not do by self in last month'  
2 = '2 No Difficulty by self (and when using dressing devices)'  
3 = '3 Difficulty by self (and when using dressing devices)'  
6 = '6 Did by self in last month/DKRF Difficulty'  
7 = '7 DKRF Did by self in last month/DKRF Difficulty'  
8 = '8 Not done in last month'  
-1 = '-1 Inapplicable'  
-9 = '-9 Missing';
```

### VALUE dmedssfd

```
1 = '1 Did not do by self in last month'  
2 = '2 Did by self in last month/No Difficulty'  
3 = '3 Did by self in last month/Difficulty'  
4 = '4 DKRF Did by self in last month/No Difficulty'  
5 = '5 DKRF Did by self in last month/Difficulty'  
6 = '6 Did by self in last month/DKRF Difficulty'  
7 = '7 DKRF Did by self in last month/DKRF Difficulty'  
8 = '8 Not done in last month'  
9 = '9 No or DKRF if medications taken in last month'  
-1 = '-1 Inapplicable'  
-9 = '-9 Missing';
```

### VALUE dmedsrea

```
1 = '1 HEALTH/FUNCTIONING REASON ONLY'  
2 = '2 OTHER REASON ONLY'  
3 = '3 BOTH HEALTH/FUNCTIONING AND OTHER'  
4 = '4 SERVICE/SOMEONE FROM THE PLACE SP LIVES'  
-7 = '-7 RF'  
-8 = '-8 DK'  
-1 = '-1 Inapplicable'  
-9 = '-9 Missing';
```

### VALUE dmarstat

```
1 = '1 Married'  
2 = '2 Living with a partner'  
3 = '3 Separated'  
4 = '4 Divorced'  
5 = '5 Widowed'  
6 = '6 Never married'  
-7 = '-7 RF'  
-8 = '-8 DK'  
-1 = '-1 Inapplicable'
```

## SAS ALGORITHM FOR DEMENTIA

```
-9 = '-9 Missing';
VALUE DSPSAGEC
  -7 = '-7 RF'
  -8 = '-8 DK'
  -1 = '-1 Inapplicable'
  -9 = '-9 Missing'
  1 = " 1 UNDER 50"
  2 = " 2 50-54"
  3 = " 3 55-59"
  4 = " 4 60-64"
  5 = " 5 65-69"
  6 = " 6 70-74"
  7 = " 7 75-79"
  8 = " 8 80-84"
  9 = " 9 85-89"
 10 = "10 90 +" ;
VALUE dresid
  1 = '1 Community '
  2 = '2 Residential Care Resident not nursing home (SP interview
complete)'
  3 = '3 Residential Care Resident not nursing home (FQ only)'
  4 = '4 Nursing Home Resident';
VALUE f_dresid
  1 = '1 Community '
  2 = '2 Residential care not nursing home (SP interview)'
  3 = '3 Residential care not nursing home (FQ only)'
  4 = '4 Nursing home (SP interview)'
  5 = '5 Nursing home (FQ only)'
  6 = '6 Deceased'
  7 = '7 Residential care not nursing home in R1 and R2 (FQ only)'
  8 = '8 Nursing home in R1 and R2 (FQ only)' ;
VALUE f2dresid
  -1='-1 Inapplicable'
  1 = '1 Community '
  2 = '2 Residential care not nursing home (SP interview)'
  3 = '3 Residential care not nursing home (FQ only)'
  4 = '4 Nursing home (SP interview)'
  5 = '5 Nursing home (FQ only)'
  6 = '6 Deceased'
  7 = '7 Residential care not nursing home in R1 and R2 (FQ only)'
  8 = '8 Nursing home in R1 and R2 (FQ only)' ;
VALUE f3dresid
  -1='-1 Inapplicable'
  1 = '1 Community '
  2 = '2 Residential care not nursing home (SP interview)'
  3 = '3 Residential care not nursing home (FQ only)'
  4 = '4 Nursing home (SP interview)'
  5 = '5 Nursing home (FQ only)'
  6 = '6 Deceased'
  7 = '7 Residential care not nursing home in R1 and R3 (FQ only)'
  8 = '8 Nursing home in R1 and R3 (FQ only)' ;
VALUE f4dresid
  -1='-1 Inapplicable'
  1 = '1 Community '
  2 = '2 Residential care not nursing home (SP interview)'
  3 = '3 Residential care not nursing home (FQ only)'
  4 = '4 Nursing home (SP interview)'
```

## SAS ALGORITHM FOR DEMENTIA

```
5 = '5 Nursing home (FQ only)'  
6 = '6 Deceased'  
7 = '7 Residential care not nursing home in R1 and R4 (FQ only)'  
8 = '8 Nursing home in R1 and R4 (FQ only)';
```

### VALUE QUARTILE

```
-9="-9 Missing"  
-1="-1 Inapplicable";
```

### VALUE SPPB

```
-9="-9 Missing"  
-1="-1 Inapplicable";
```

### VALUE SPPB\_MIS

```
-9="-9 Missing"  
-1="-1 Inapplicable"  
1="1 PROXY INTERVIEW"  
2="2 MISSING WALK AND REPEAT CHAIR AND BALANCE"  
3="3 MISSING WALK AND REPEAT CHAIR"  
4="4 MISSING WALK AND BALANCE"  
5="5 MISSING REPEAT CHAIR AND BALANCE"  
6="6 MISSING WALK"  
7="7 MISSING REPEAT CHAIR"  
8="8 MISSING BALANCE"  
9="9 NO SPACE"  
10="10 NO CHAIR"  
11="11 NO SPACE WALK AND NO CHAIR"  
12="12 NO SPACE WALK AND NON-SAFETY MISSING"  
13="13 NO CHAIR AND NON-SAFETY MISSING"  
14="14 NON-SAFETY WALK"  
15="15 NON-SAFETY CHAIR"  
16="16 NON-SAFETY BALANCE"  
17="17 NON-SAFETY WALK AND CHAIR"  
18="18 NON-SAFETY WALK AND BALANCE"  
19="19 NON-SAFETY CHAIR AND BALANCE"  
20="20 NON SAFETY WALK AND CHAIR AND BALANCE";
```

### VALUE DCLCKSC

```
0 = '0 Not recognizable as a clock'  
1 = '1 Severely distorted depiction of a clock'  
2 = '2 Moderately distorted depiction of a clock'  
3 = '3 Mildly distorted depiction of a clock'  
4 = '4 Reasonably accurate depiction of a clock'  
5 = '5 Accurate depiction of a clock (circular or square)'  
-7 = '-7 SP refused to draw clock'  
-8 = '-8 DK'  
-1 = '-1 Inapplicable'  
-2 = '-2 Proxy says cannot ask SP'  
-3 = '-3 Proxy says can ask SP but SP unable to answer'  
-4 = '-4 SP did not attempt to draw clock'  
-9 = '-9 Missing';
```

### VALUE DCLCKCL

```
1 = '1 Very clear'  
2 = '2 Somewhat clear'  
3 = '3 Somewhat unclear'  
4 = '4 Very unclear'  
5 = '5 Blank'
```

## SAS ALGORITHM FOR DEMENTIA

```
-7 = '-7 SP refused to draw clock'  
-8 = '-8 DK'  
-1 = '-1 Inapplicable'  
-2 = '-2 Proxy says cannot ask SP'  
-3 = '-3 Proxy says can ask SP but SP unable to answer'  
-4 = '-4 SP did not attempt to draw clock'  
-9 = '-9 Missing';
```

### VALUE RESULT

```
-9='-9: MISSING'  
1='1: COMPLETED W RESULTS'  
2='2: COMPLETED MISSING RESULTS'  
3='3: ATTEMPTED W RESULTS'  
4='4: ATTEMPTED MISSING RESULTS'  
5='5: NOT ATTEMPTED SAFETY'  
6='6: NOT ATTEMPTED NOT SAFETY REASON'  
7='7: NO CHAIR/NO SPACE'  
9='9: NOT ATTEMPTED/MISSING';
```

### VALUE RESULT\_SCH

```
-9='-9: MISSING'  
1='1: COMPLETED W/OUT ARMS'  
2='2: COMPLETED W ARMS'  
3='3: ATTEMPTED W RESULTS'  
4='4: ATTEMPTED MISSING RESULTS'  
5='5: NOT ATTEMPTED SAFETY'  
6='6: NOT ATTEMPTED NOT SAFETY REASON'  
7='7: NO CHAIR/SAFETY REASON'  
8='8: NO CHAIR/NOT SAFETY REAS'  
9='9: NOT ATTEMPTED/MISSING'  
10='10: CH4=1 SINGLE CHAIR NOT COMPL';
```

### VALUE RESULT\_RCH

```
-9='-9: MISSING'  
1='1: COMPLETED W/OUT ARMS'  
2='2: COMPLETED MISSING RESULTS'  
3='3: ATTEMPTED W RESULTS'  
4='4: ATTEMPTED MISSING RESULTS'  
5='5: NOT ATTEMPTED SAFETY'  
6='6: NOT ATTEMPTED NOT SAFETY REASON'  
9='9: NO CHAIR OR NOT ATTEMPTED/MISSING';
```

### VALUE ZEROSCORE

```
1="1: NOT ELIGIBLE DUE TO EXCLUSION CRITERIA"  
2="2: NOT ATTEMPTED FOR SAFETY REASON"  
3="3: ATTEMPTED CHAIR STANDS/NOT ATTEMPTED FOR SAFETY"  
4="4: ATTEMPTED"  
5="5: NEW WALKING EXCLUSION"  
9="9: NOT ASSIGNED A ZERO SCORE";
```

### VALUE D\_LMLLOC

```
1 = '1 Community'  
2 = '2 Residential Care'  
-1 = '-1 Inapplicable'  
-9 = '-9 Missing';
```

### VALUE D\_LOCSP

## SAS ALGORITHM FOR DEMENTIA

```
-7 = '-7 RF'
-8 = '-8 DK'
-1 = '-1 Inapplicable'
-9 = '-9 Missing'
 1 = "1 Independent Living/Housing/Retirement"
 2 = "2 Assisted Living/Personal Care"
 3 = "3 Special Care, Memory or Alzheimer's Unit"
 4 = "4 Nursing Home"
 8 = "8 Not Reported" ;

VALUE PA25FMT
-1 = '-1 Inapplicable'
-9 = '-9 Missing'
111= '111 Sleeping Napping'
131= '131 Eating'
132= '132 Going out to eat'
199= '199 Other self care activities'
211= '211 Work and work-related activities'
221= '221 Other income generating activities'
241= '241 Volunteering'
299= '299 Other productive activities'
321= '321 Shopping for non-durable goods'
399= '399 Other shopping'
411= '411 Food and drink preparation'
434= '434 Outdoor Maintenance'
439= '439 Household chores (cannot tell if indoor/outdoor)'
441= '441 Animal and pet care'
442= '442 Walking and exercising pets'
449= '449 Other animal and pet care'
451= '451 Vehicle maintenance and repair'
471= '471 Financial management'
499= '499 Other household activities'
511= '511 Physical care and assistance to others'
599= '599 Other physical care'
611= '611 Socializing with others in person'
612= '612 Socializing with others on the phone'
616= '616 Socializing and communicating on the computer'
621= '621 Watching TV and movies'
631= '631 Doing puzzles or games not on computer or online'
632= '632 Gambling not online or at a casino'
636= '636 Doing puzzles or games on a computer or online'
641= '641 Arts and crafts or hobbies'
642= '642 Reading'
643= '643 Writing'
644= '644 Listening to music'
646= '646 Computer or online leisure activities'
651= '651 Smoking or other tobacco use'
652= '652 Drinking alcohol'
661= '661 Doing nothing/relaxing'
669= '669 No activity'
699= '699 Other non active leisure'
711= '711 Playing sports'
712= '712 Walking or jogging'
713= '713 Other outdoor recreating activities'
714= '714 Attending sporting events'
715= '715 Other physical activity, exercise, yoga, swimming, working out,
dancing'
```

## SAS ALGORITHM FOR DEMENTIA

718= '718 Watching sporting events'  
721= '721 Attending arts including plays and concerts'  
723= '723 Attending movies'  
724= '724 Attending casinos'  
737= '737 Travel for leisure'  
799= '799 Other active leisure'  
811= '811 Attending religious activities'  
812= '812 Other religious and spiritual activities'  
821= '821 Attending meetings or events'  
899= '899 Other organizational activity'  
991= '991 Other miscellaneous'  
992= '992 No favorite activity'  
997= '997 Refused'  
998= '998 Dont Know'  
999= '999 Not Codeable';

### VALUE OCC\_CODE

1 = '1 Management Occupations: 0010-0430'  
2 = '2 Business and Financial Operations Occupations: 0500-0950'  
3 = '3 Computer and mathematical occupations: 1000-1240'  
4 = '4 Architecture and Engineering Occupations: 1300-1560'  
5 = '5 Life, Physical, and Social Science Occupations: 1600-1965'  
6 = '6 Community and Social Service Occupations: 2000-2060'  
7 = '7 Legal Occupations: 2100-2160'  
8 = '8 Education, Training, and Library Occupations: 2200-2550'  
9 = '9 Arts, Design, Entertainment, Sports, and Media Occupations: 2600-2960'  
10 = '10 Healthcare Practitioners and Technical Occupations: 3000-3540'  
11 = '11 Healthcare Support Occupations: 3600-3655'  
12 = '12 Protective Service Occupations: 3700-3955'  
13 = '13 Food Preparation and Serving Related Occupations: 4000-4160'  
14 = '14 Building and Grounds Cleaning and Maintenance Occupations: 4200-4250'  
15 = '15 Personal Care and Service Occupations: 4300-4650'  
16 = '16 Sales and Related Occupations: 4700-4965'  
17 = '17 Office and Administrative Support Occupations: 5000-5940'  
18 = '18 Farming, Fishing, and Forestry Occupations: 6000-6130'  
19 = '19 Construction and Extraction Occupations: 6200-6940'  
20 = '20 Installation, Maintenance, and Repair Occupations: 7000-7630'  
21 = '21 Production Occupations: 7700-8965'  
22 = '22 Transportation and Material Moving Occupations: 9000-9750'  
23 = '23 Military Specific Occupations: 9800-9830'  
24 = '24 No current occ (Unemployed, no work in the last 5 years, never worked): 9920'  
25 = '25 Blank field'  
26 = '26 Code did not match'  
94 = '94 Uncodable'  
95 = '95 Never Worked Entire Life'  
96 = '96 Homemaker/Raised Children'  
-7 = '-7 RF'  
-8 = '-8 DK'  
-1 = '-1 Inapplicable'  
-9 = '-9 Missing';

### Value fl\_Dfac

1 = '1 Should have routed as facility but did not'  
2 = '2 Routed as facility but determined not facility resident'



## SAS ALGORITHM FOR DEMENTIA

```
-1 = '-1 Inapplicable';
VALUE PE_RSLT
  -9='-9 Missing'
  -1 = '-1 Inapplicable'
  1='1 Completed'
  2='2 Attempted'
  3='3 Not attempted' ;
VALUE dosfacd /* FOR FQ2dosfacd */
  -9= "-9 Missing"
  -8 = "-8 DK"
  -1 = "-1 INAPPLICABLE"
  1 = " 1 FREE STANDING NURSING HOME"
  2 = " 2 FREE STANDING ASSISTED LIVING FACILITY / RESIDENTIAL CARE
FACILITY"
  3 = " 3 NURSING HOME AND ASSISTED LIVING FACILITY"
  4 = " 4 CONTINUING CARE RETIREMENT COMMUNITY (CCRC)"
  5 = " 5 ADULT FAMILY CARE HOME"
  6 = " 6 GROUP HOME"
  7 = " 7 BOARD AND CARE HOME / PERSONAL CARE HOME"
  8 = " 8 RETIREMENT COMMUNITY OR SENIOR HOUSING (NOT CCRC)"
  9 = " 9 INDEPENDENT LIVING"
  10 = " 10 ASSISTED AND INDEPENDENT/RETIREMENT (NO NURSING HOME)"
  11 = " 11 HOUSING (APT, CONDO, ETC.)";
;
VALUE dosfaca /* FOR FQ2dosfaca */
  -9= "-9 Missing"
  -8 = "-8 DK"
  -1 = "-1 INAPPLICABLE"
  1 = " 1 INDEPENDENT LIVING / HOUSING / RETIREMENT "
  2 = " 2 ASSISTED LIVING / PERSONAL CARE"
  3 = " 3 SPECIAL CARE, MEMORY CARE, OR ALZHEIMER'S UNIT"
  4 = " 4 NURSING HOME" ;

VALUE INAP_YN
  1 = ' 1 Yes'
  2 = ' 2 No'
  -1 = '-1 Inapplicable' ;
VALUE CENDIV /* RE1DCENSDIV - Updated for R2 - Re-Release */
  1 = '1 Northeast Region: New England Division (ME, NH, VT, MA, RI, CT)'
  2 = '2 Northeast Region: Middle Atlantic Division (NY, NJ, PA)'
  3 = '3 Midwest Region: East North Central Division (OH, IN, IL, MI, WI)'
  4 = '4 Midwest Region: West North Central Division (MN, IA, MO, ND, SD,
NE, KS)'
  5 = '5 South Region: South Atlantic Division (DE, MD, DC, VA, WV, NC,
SC, GA, FL)'
  6 = '6 South Region: East South Central Division (KY, TN, AL, MS)'
  7 = '7 South Region: West South Central Division (AR, LA, OK, TX)'
  8 = '8 West Region: Mountain Division (MT, ID, WY, CO, NM, AZ, UT, NV)'
  9 = '9 West Region: Pacific Division (WA, OR, CA, AK, HI)'
  -9 = '-9 Missing';

VALUE W000002W
  -7 = '-7 RF'
  -8 = '-8 DK'
  -1 = '-1 Inapplicable'
  -9 = '-9 Missing'
  1 = "1 MALE"
```

## SAS ALGORITHM FOR DEMENTIA

```
    2 = "2 FEMALE" ;

VALUE W000005W
  1 = ' 1 Yes'
  2 = ' 2 No'
 -7 = '-7 RF'
 -8 = '-8 DK'
 -1 = '-1 Inapplicable'
 -9 = '-9 Missing';

VALUE R1DRESID
  1 = '1 Community '
  2 = '2 Residential Care Resident not nursing home (SP interview
complete)'
  3 = '3 Residential Care Resident not nursing home (FQ only)'
  4 = '4 Nursing Home Resident';

VALUE W200016W
 -7 = '-7 RF'
 -8 = '-8 DK'
 -1 = '-1 Inapplicable'
 -9 = '-9 Missing'
  1 = "1 MEDICAID"
  2 = "2 MEDICARE"
  3 = "3 STATE PROGRAM"
 91 = "91 OTHER (SPECIFY)" ;

VALUE W200012W
 -7 = '-7 RF'
 -8 = '-8 DK'
 -1 = '-1 Inapplicable'
 -9 = '-9 Missing'
  1 = "1 REGULAR"
  2 = "2 VARIED" ;

VALUE W200061W
 -7 = '-7 RF'
 -8 = '-8 DK'
 -1 = '-1 Inapplicable'
 -9 = '-9 Missing'
  1 = "1 SEPARATION OR DIVORCE"
  2 = "2 DECEASED"
  3 = "3 MOVED ELSEWHERE"
  5 = "5 LAST INTERVIEW INFORMATION INCORRECT"
  8 = "8 OTHER REASON" ;

VALUE d2hrsmth
 -13= '-13 Deceased '
 -12= '-12 Zero days/wk'
 -11= '-11 Hours missing'
 -10= '-10 Days missing'
 -9 = ' -9 Days and hrs missing'
 -1 = ' -1 Inapplicable'
 -7 = ' -7 RF'
 -8 = ' -8 DK'
 0-<1 = '<1'
 1-<10 = ' 1-<10'
```

## SAS ALGORITHM FOR DEMENTIA

```
10-<20 = '10-<20'  
20-<30 = '20-<30'  
30-<40 = '30-<40'  
40-<60 = '40-<60'  
60-<120 = '60-<120'  
120-<180 = '120-<180'  
180-744 = '180-744 (24/7)'  
9999 = '9999 Not codeable, <1 hour/day' ;
```

VALUE dhrrsmth

```
-11 = '-11:hours missing'  
-10 = '-10:days missing'  
-9 = '-9:days and hrs missing'  
-1 = '-1 Inapplicable'  
-7 = '-7 RF'  
-8 = '-8 DK'  
0-<1 = '<1'  
1-<10 = ' 1-<10'  
10-<20 = '10-<20'  
20-<30 = '20-<30'  
30-<40 = '30-<40'  
40-<60 = '40-<60'  
60-<120 = '60-<120'  
120-<180 = '120-<180'  
180-744 = '180-744 (24/7)'  
9999 = '9999 Not codeable, <1 hour/day' ;
```

Value dmissadd

```
-1 = '-1 Inapplicable'  
1 = '1 no flags and added at CL section'  
2 = '2 no flags and added at DT section'  
3 = '3 no flags and added at EW section'  
4 = '4 no flags and added at HA section'  
5 = '5 no flags and added at HO section'  
6 = '6 no flags and added at MC section'  
7 = '7 no flags and added at MO section'  
8 = '8 no flags and added at PA section'  
9 = '9 no flags and added at PE section'  
10 = '10 no flags and added at SC section'  
11 = '11 no flags and added at SN section';
```

Value d2mssadd

```
-1 = '-1 Inapplicable'  
0 = '0 no flags and added at undetermined section'  
1 = '1 no flags and added at CL section'  
2 = '2 no flags and added at DT section'  
3 = '3 no flags and added at EW section'  
4 = '4 no flags and added at HA section'  
5 = '5 no flags and added at HO section'  
6 = '6 no flags and added at MC section'  
7 = '7 no flags and added at MO section'  
8 = '8 no flags and added at PA section'  
9 = '9 no flags and added at PE section'  
10 = '10 no flags and added at SC section'  
11 = '11 no flags and added at SN section'  
12 = '12 no flags and added at CS section'  
13 = '13 no flags and added at HH section'
```

## SAS ALGORITHM FOR DEMENTIA

```
14='14 no flags and added at IS section';
```

```
Value d4mssadd
```

```
-1='-1 Inapplicable'  
0='0 no flags and added at undetermined section'  
1='1 no flags and added at CL section'  
2='2 no flags and added at DT section'  
3='3 no flags and added at EW section'  
4='4 no flags and added at HA section'  
5='5 no flags and added at HO section'  
6='6 no flags and added at MC section'  
7='7 no flags and added at MO section'  
8='8 no flags and added at PA section'  
9='9 no flags and added at PE section'  
10='10 no flags and added at SC section'  
11='11 no flags and added at SN section'  
12='12 no flags and added at CS section'  
13='13 no flags and added at HH section'  
14='14 no flags and added at IS section'  
15='15 no flags and added at HL section'  
16='16 no flags and added at SL section';
```

```
Value dopage3c
```

```
-9='-9 Missing'  
-8='-8 RF'  
-7='-7 DK'  
-1='-1 Inapplicable'  
1='1 UNDER 30'  
2='2 30-39'  
3='3 40-49'  
4='4 50-59'  
5='5 60-69'  
6='6 70-79'  
7='7 80-89'  
8='8 90 +';
```

```
Value dopagect
```

```
-9='-9 Missing'  
-8='-8 DK'  
-7='-7 RF'  
-1='-1 Inapplicable'  
1='1 UNDER 20'  
2='2 20-24'  
3='3 25-29'  
4='4 30-34'  
5='5 35-39'  
6='6 40-44'  
7='7 45-49'  
8='8 50-54'  
9='9 55-59'  
10='10 60-64'  
11='11 65-69'  
12='12 70-74'  
13='13 75-79'  
14='14 80-84'  
15='15 85-89'  
16='16 90 +';
```

## SAS ALGORITHM FOR DEMENTIA

```
VALUE W200008W
-7 = '-7 RF'
-8 = '-8 DK'
-1 = '-1 Inapplicable'
-9 = '-9 Missing'
1 = "1 UNDER 20"
2 = "2 20-24"
3 = "3 25-29"
4 = "4 30-34"
5 = "5 35-39"
6 = "6 40-44"
7 = "7 45-49"
8 = "8 50-54"
9 = "9 55-59"
10 = "10 60-65"
11 = "11 66-69"
12 = "12 70-74"
13 = "13 75-79"
14 = "14 80-85"
15 = "15 86-89"
16 = "16 90-94"
17 = "17 95-99"
18 = "18 100 +"
;
VALUE NumCigs
-7 = '-7 RF'
-8 = '-8 DK'
-1 = '-1 Inapplicable'
-9 = '-9 Missing'
999 = '999 SP smokes less than 1 cigarette / day';

VALUE dlmlint
1 = '1 Last month of life interview'
-1 = '-1 Inapplicable' ;

VALUE d2intvra
1 = '1 65 to 69'
2 = '2 70 to 74'
3 = '3 75 to 79'
4 = '4 80 to 84'
5 = '5 85 to 89'
6 = '6 90+'
-7 = '-7 RF'
-8 = '-8 DK'
-1 = '-1 Inapplicable'
-9 = '-9 Missing' ;

VALUE dad8dem
1 = '1 DEMENTIA RESPONSE TO ANY AD8 ITEMS IN PRIOR ROUNDS'
-1 = '-1 Inapplicable' ;

VALUE dwrardinon
1 = '1 NO WORDS REMEMBERED'
-1 = '-1 Inapplicable'
```

## SAS ALGORITHM FOR DEMENTIA

```
-9 = '-9 Missing'      ;

VALUE dwrdirre
  1 = '1 REFUSED WORD RECALL TASK'
 -1 = '-1 Inapplicable'
 -9 = '-9 Missing'      ;

VALUE A0001AB
  1 = "1 AM"
  2 = "2 PM"
 -1 = '-1 Inapplicable'
 -9 = '-9 Missing';

VALUE A0002WA
  1 = "1 Yes, there is space to set up the walking course"
  2 = "2 No, there is not space to set up the walking course"
 -1 = '-1 Inapplicable'
 -9 = '-9 Missing';

VALUE A0004WA
  1 = "1 None"
  2 = "2 Cane"
  3 = "3 Walker or rollator"
  9 = "9 Other, specify"
 -1 = '-1 Inapplicable'
 -7 = '-7 RF'
 -8 = '-8 DK'
 -9 = '-9 Missing';

VALUE A0004CH
  1 = "1 No, chair stand not completed"
  2 = "2 Yes, chair stand completed"
 -1 = '-1 Inapplicable'
 -9 = '-9 Missing';

VALUE A0008CH
  1 = "1 With arms"
  2 = "2 Without arms"
 -1 = '-1 Inapplicable'
 -9 = '-9 Missing';

VALUE A0014CH
  1 = "1 1 Chair stand completed"
  2 = "2 2 Chair stands completed"
  3 = "3 3 Chair stands completed"
  4 = "4 4 Chair stands completed"
 -1 = '-1 Inapplicable'
 -9 = '-9 Missing';

VALUE BA1SS
  1 = '1 Eligible and recorded result for SxS Balance'
  2 = '2 Eligible and no recorded result for SxS Balance'
  4 = '4 Not Eligible due to exclusion criteria'
 -1 = '-1 Inapplicable'
 -9 = '-9 Missing';

VALUE BA1STAN
```

## SAS ALGORITHM FOR DEMENTIA

```
1 = '1 Eligible and recorded result for Semi Tandem Balance'  
2 = '2 Eligible and no recorded result for Semi Tandem Balance'  
3 = '3 Not administered because did not complete prior balance test'  
4 = '4 Not Eligible due to exclusion criteria'  
-1 = '-1 Inapplicable'  
-9 = '-9 Missing';
```

### VALUE BA1TAN

```
1 = '1 Eligible and recorded result for full tandem balance'  
2 = '2 Eligible and no recorded result for full tandem balance'  
3 = '3 Not administered because did not complete prior balance tests'  
4 = '4 Not Eligible due to exclusion criteria'  
-1 = '-1 Inapplicable'  
-9 = '-9 Missing';
```

### VALUE BA1OP

```
1 = '1 Eligible and recorded result for one leg eyes open balance'  
2 = '2 Eligible and no recorded result for one leg eyes open balance'  
3 = '3 Not administered because did not complete prior balance tests'  
4 = '4 Not Eligible due to exclusion criteria'  
-1 = '-1 Inapplicable'  
-9 = '-9 Missing';
```

### VALUE BA1CL

```
1 = '1 Eligible and recorded result for one leg eyes closed balance'  
2 = '2 Eligible and no recorded result for one leg eyes closed balance'  
3 = '3 Not administered because did not complete prior balance tests'  
4 = '4 Not Eligible due to exclusion criteria'  
-1 = '-1 Inapplicable'  
-9 = '-9 Missing';
```

### VALUE WA1WLK

```
1 = '1 Eligible and recorded result for walking course'  
2 = '2 Eligible and no recorded result for walking course'  
4 = '4 Not Eligible due to exclusion criteria'  
5 = '5 Not Eligible on exclusion criteria but recorded result (SP changed  
mind)'  
-1 = '-1 Inapplicable '  
-9 = '-9 Missing';
```

### VALUE CH1SCH

```
1 = '1 Eligible and recorded result for single chair stand'  
2 = '2 Eligible and no recorded result for single chair stand'  
4 = '4 Not Eligible due to exclusion criteria'  
-1 = '-1 Inapplicable'  
-9 = '-9 Missing';
```

### VALUE CH1RSH

```
1 = '1 Eligible and recorded result for repeated chair stand'  
2 = '2 Eligible and no recorded result for repeated chair stand'  
3 = '3 Not administered because did not complete single chair stand w/o  
arms'  
4 = '4 Not Eligible due to exclusion criteria'  
-1 = '-1 Inapplicable'  
-9 = '-9 Missing';
```

### VALUE GR1GRIP

## SAS ALGORITHM FOR DEMENTIA

```
1 = '1 Eligible and recorded result for grip strength'  
2 = '2 Eligible and no recorded result for grip strength'  
4 = '4 Not Eligible due to exclusion criteria'  
-1 = '-1 Inapplicable'  
-9 = '-9 Missing';
```

### VALUE WC1WAIST

```
1 = '1 Eligible and recorded result for waist circumference'  
2 = '2 Eligible and no recorded result for waist circumference'  
-1 = '-1 Inapplicable'  
-9 = '-9 Missing';
```

### VALUE PK1PEAK

```
1 = '1 Eligible and recorded result for peak air flow'  
2 = '2 Eligible and no recorded result for peak air flow'  
-1 = '-1 Inapplicable'  
-9 = '-9 Missing';
```

### VALUE RGT\_LFT

```
1 = '1 Right'  
2 = '2 Left'  
-1 = '-1 Inapplicable'  
-9 = '-9 Missing';
```

### VALUE PERSON

```
1 = '1 Interviewer'  
2 = '2 Sample person'  
-1 = '-1 Inapplicable'  
-9 = '-9 Missing';
```

### VALUE STAND

```
1 = '1 Standing'  
2 = '2 Sitting'  
3 = '3 Lying down'  
-1 = '-1 Inapplicable'  
-9 = '-9 Missing';
```

### VALUE EFFORT

```
1 = '1 Full effort'  
2 = '2 Less effort for health reason'  
3 = '3 Less effort for other reason'  
-1 = '-1 Inapplicable'  
-9 = '-9 Missing';
```

### VALUE WORDREC

```
1 = ' 1 LIST 1'  
2 = ' 2 LIST 2'  
3 = ' 3 LIST 3'  
-1 = '-1 Inapplicable '  
-9 = '-9 Missing';
```

### VALUE WORDRE\_N

```
-1 = '-1 Inapplicable'  
-2 = '-2 Proxy says cannot ask SP'  
-3 = '-3 Proxy says can ask SP but SP unable to answer'  
-7 = '-7 SP refused activity'  
-9 = '-9 Missing';
```

### VALUE DMH\_GRP



## SAS ALGORITHM FOR DEMENTIA

```
1 = "1 Help started"
2 = "2 Help ended"
3 = "3 Help both interviews with gap"
4 = "4 Help both interviews with no gap"
5 = "5 Help between interviews only (month ended missing)"
6 = "6 No help either interview or between"
11 = "11 Help started (month started missing)"
21 = "21 Help ended (month ended missing)"
41 = "41 Help both interviews (DK whether gap)"
61 = "61 No help either interview (DK whether help between)"
-9 = "-9 Missing"
-1 = "-1 Inapplicable"
-999 = "-999 Not determined" ;

VALUE DMU_GRP
1 = "1 Use started"
2 = "2 Use ended"
3 = "3 Use both interviews with gap"
4 = "4 Use both interviews with no gap"
5 = "5 Use between interviews only (month ended missing)"
6 = "6 No use either interview or between"
11 = "11 Use started (month started missing)"
21 = "21 Use ended (month ended missing)"
41 = "41 Use both interviews (DK whether gap)"
61 = "61 No use either interview (DK whether use between)"
-9 = "-9 Missing"
-1 = "-1 Inapplicable"
-999 = "-999 Not determined" ;

VALUE DS_GRP
1 = "1 Help started"
2 = "2 Help ended"
3 = "3 Help both interviews with gap"
4 = "4 Help both interviews with no gap"
5 = "5 Help between interviews only"
6 = "6 No help either interview or between"
11 = "11 Help started (month started missing)"
21 = "21 Help ended (month ended missing)"
41 = "41 Help both interviews (DK whether gap)"
61 = "61 No help either interview (DK whether help between)"
-9 = "-9 Missing"
-1 = "-1 Inapplicable"
-999 = "-999 Not determined" ;

VALUE DMDSINTV
0 = "0 Less than 1 month"
1 = "1 Month"
2 = "2 Months"
3 = "3 Months"
4 = "4 Months"
5 = "5 Months"
6 = "6 Months"
7 = "7 Months"
8 = "8 Months"
9 = "9 Months"
10 = "10 Months"
11 = "11 Months"
```

## SAS ALGORITHM FOR DEMENTIA

```
12 = "12 Months"  
13 = "13 Months"  
14 = "14 Months"  
15 = "15 Months"  
16 = "16 Months"  
17 = "17 Months"  
18 = "18 Months"  
19 = "19 Months"  
20 = "20 Months"  
90 = "90 Last round disputed"  
-1 = "-1 Inapplicable"  
-7 = "-7 Refused"  
-8 = "-8 Dont know"  
-9 = "-9 Missing" ;
```

```
VALUE DMDS_DUR  
0 = "0 Less than 1 month"  
1 = "1 Month"  
2 = "2 Months"  
3 = "3 Months"  
4 = "4 Months"  
5 = "5 Months"  
6 = "6 Months"  
7 = "7 Months"  
8 = "8 Months"  
9 = "9 Months"  
10 = "10 Months"  
11 = "11 Months"  
12 = "12 Months"  
13 = "13 Months"  
14 = "14 Months"  
15 = "15 Months"  
16 = "16 Months"  
17 = "17 Months"  
90 = "90 Last round disputed"  
-1 = "-1 Inapplicable"  
-7 = "-7 Refused"  
-8 = "-8 Dont know"  
-9 = "-9 Missing"  
-10 = "-10 Not ascertained"  
-12 = "-12 Outside of range"  
-13 = "-13 None" ;
```

```
VALUE DMDSFLG  
-1 = "-1 Inapplicable"  
1 = "1 No SP interview last round"  
2 = "2 Died and month death missing"  
3 = "3 Died <=1 month after last interview"  
4 = "4 Died 12-13 months after last interview"  
5 = "5 Died and not mobile (fl2notmobile=1)"  
6 = "6 Died and not alert (fl2notalert =1)"  
7 = "7 Skipped 1 or more help questions" ;
```

```
VALUE SP30051W  
-7 = '-7 RF'  
-8 = '-8 DK'  
-1 = '-1 Inapplicable'  
-9 = '-9 Missing'
```

## SAS ALGORITHM FOR DEMENTIA

```
1 = "1 EXCELLENT"
2 = "2 VERY GOOD"
3 = "3 GOOD"
4 = "4 FAIR"
5 = "5 POOR"
6 = "6 DOES NOT APPLY/NO CARE IN LAST MONTH OF LIFE"
;
VALUE SP3019aW
  -7 = '-7 RF'
-8 = '-8 DK'
-1 = '-1 Inapplicable'
-9 = '-9 Missing'
  1 = "1 JANUARY"
  2 = "2 FEBRUARY"
  3 = "3 MARCH"
  4 = "4 APRIL"
  5 = "5 MAY"
  6 = "6 JUNE"
  7 = "7 JULY"
  8 = "8 AUGUST"
  9 = "9 SEPTEMBER"
 10 = "10 OCTOBER"
 11 = "11 NOVEMBER"
 12 = "12 DECEMBER"
 90 = "90 LAST INTERVIEW INFORMATION INCORRECT"
;
VALUE RACEHISP
  1 = ' 1 White, non-hispanic'
  2 = ' 2 Black, non-hispanic'
  3 = ' 3 Other (Am Indian/Asian/Native Hawaiian/Pacific Islander/other
specify), non-Hispanic'
  4 = ' 4 Hispanic'
  5 = ' 5 More than one DKRF primary'
  6 = ' 6 DKRF'
 -9 = '-9 Missing';

/* The following may not need to be included on the public release file but
are
      needed for internal Westat File processing */

VALUE SPPB_MISSING
  -7 = '-7 RF'
-8 = '-8 DK'
-9 = '-9 Missing'
-1="-1 Inapplicable"
 1="1 PROXY INTERVIEW"
 2="2 MISSING WALK AND REPEAT CHAIR AND BALANCE"
 3="3 MISSING WALK AND REPEAT CHAIR"
 4="4 MISSING WALK AND BALANCE"
 5="5 MISSING REPEAT CHAIR AND BALANCE"
 6="6 MISSING WALK"
 7="7 MISSING REPEAT CHAIR"
 8="8 MISSING BALANCE"
 9="9 NO SPACE"
10="10 NO CHAIR"
11="11 NO SPACE WALK AND NO CHAIR"
12="12 NO SPACE WALK AND NON-SAFETY MISSING"
```

## SAS ALGORITHM FOR DEMENTIA

```
13="13 NO CHAIR AND NON-SAFETY MISSING"
14="14 NON-SAFETY WALK"
15="15 NON-SAFETY CHAIR"
16="16 NON-SAFETY BALANCE"
17="17 NON-SAFETY WALK AND CHAIR"
18="18 NON-SAFETY WALK AND BALANCE"
19="19 NON-SAFETY CHAIR AND BALANCE"
20="20 NON SAFETY WALK AND CHAIR AND BALANCE";

VALUE QUARTILES
-9="-9 Missing"
-1="-1 Inapplicable"
;

VALUE SP30025W
  -7 = '-7 RF'
  -8 = '-8 DK'
  -1 = '-1 Inapplicable'
  -9 = '-9 Missing'
  1 = "1 FREE-STANDING (DETACHED) SINGLE HOUSE"
  2 = "2 SINGLE HOUSE BUT ATTACHED TO OTHERS (ROW HOUSE, TOWNHOUSE, DUPLEX,
TRIPLEX, OR TRIPLE DECKER)"
  3 = "3 MOBILE HOME OR TRAILER"
  4 = "4 MULTI-UNIT (2+) BUILDING"
  91 = "91 OTHER (SPECIFY)"
;

VALUE SP30046W
  -7 = '-7 RF'
  -8 = '-8 DK'
  -1 = '-1 Inapplicable'
  -9 = '-9 Missing'
  1 = "1 AT SP'S HOME"
  2 = "2 IN A HOSPITAL"
  3 = "3 IN A NURSING HOME"
  4 = "4 IN A HOSPICE RESIDENCE"
  5 = "5 AT SOMEONE ELSE'S HOME"
  91 = "91 SOMEWHERE ELSE (SPECIFY)"
;

VALUE SP30076W
  -7 = '-7 RF'
  -8 = '-8 DK'
  -1 = '-1 Inapplicable'
  -9 = '-9 Missing'
  1 = "1 YES"
  2 = "2 NO"
  7 = "7 YES, DOESNT KNOW HOW TO USE"
;

VALUE W300151W
  -7 = '-7 RF'
  -8 = '-8 DK'
  -1 = '-1 Inapplicable'
  -9 = '-9 Missing'
  1 = "1 VERY GOOD"
  2 = "2 GOOD"
  3 = "3 FAIR"
  4 = "4 POOR"
  5 = "5 VERY POOR" ;
```

## SAS ALGORITHM FOR DEMENTIA

```

VALUE SP30076H
  -7 = '-7 RF'
  -8 = '-8 DK'
  -1 = '-1 Inapplicable'
  -9 = '-9 Missing'
95 = "95 NO USUAL NUMBER OF HOURS OR DIFFERENT FROM DAY TO DAY" ;
VALUE SP30076G
  -7 = '-7 RF'
  -8 = '-8 DK'
  -1 = '-1 Inapplicable'
  -9 = '-9 Missing'
95 = "95 NO USUAL TIME OR DIFFERENT FROM DAY TO DAY" ;
VALUE SP30076I
  -7 = '-7 RF'
  -8 = '-8 DK'
  -1 = '-1 Inapplicable'
  -9 = '-9 Missing'
95 = "95 NO USUAL NUMBER OF HOURS OR DIFFERENT FROM NIGHT TO NIGHT"
;

VALUE SP30076J
  -7 = '-7 RF'
  -8 = '-8 DK'
  -1 = '-1 Inapplicable'
  -9 = '-9 Missing'
95 = "95 NO USUAL TIME OR DIFFERENT FROM NIGHT TO NIGHT" ;
VALUE SP30076K
  -7 = '-7 RF'
  -8 = '-8 DK'
  -1 = '-1 Inapplicable'
  -9 = '-9 Missing'
  0 = "0 LESS THAN AN HOUR"
90 = "90 FELL ASLEEP RIGHT AWAY"
95 = "95 NO USUAL AMOUNT OF TIME TO FALL ASLEEP OR DIFFERENT FROM
NIGHT TO NIGHT" ;
VALUE SP30155W
  -7 = '-7 RF'
  -8 = '-8 DK'
  -1 = '-1 Inapplicable'
  -9 = '-9 Missing'
  1 = "1 NAPS PLANNED"
  2 = "2 FELL ASLEEP WITHOUT MEANING TO"
  3 = "3 BOTH (SOME PLANNED/SOME NOT)"
;

VALUE SP30120W
  -7 = '-7 RF'
  -8 = '-8 DK'
  -1 = '-1 Inapplicable'
  -9 = '-9 Missing'
  1 = "1 OFTEN"
  2 = "2 SOMETIMES"
  3 = "3 RARELY"
  4 = "4 NEVER" ;
Value HOURSF
-13='-13 SP deceased/section not administered'
-12='-12 Valid skip/staff'
-11='-11 Hours missing'

```

## SAS ALGORITHM FOR DEMENTIA

```
-10='-10 Days missing'  
-9='-9 Days and hrs missing'  
-1='-1 Inapplicable'  
0- 1='0-<1'  
1.01- 10='1-<10'  
10.01- 20='10-<20'  
20.01- 30='20-<30'  
30.01-40='30-<40'  
40.01-60='40-<60'  
60.01-120='60-<120'  
120.01-180='120-<180'  
180.01-744='180-744 (24/7)'  
9999='9999 Not codeable, <1 hour/day';  
VALUE SP30120W  
-7 = '-7 RF'  
-8 = '-8 DK'  
-1 = '-1 Inapplicable'  
-9 = '-9 Missing'  
1 = "1 OFTEN"  
2 = "2 SOMETIMES"  
3 = "3 RARELY"  
4 = "4 NEVER"  
;  
VALUE SP30118W  
-7 = '-7 RF'  
-8 = '-8 DK'  
-1 = '-1 Inapplicable'  
-9 = '-9 Missing'  
1 = "1 A LOT"  
2 = "2 SOME"  
3 = "3 A LITTLE"  
4 = "4 NOT AT ALL"  
;  
VALUE SP30141W  
-7 = '-7 RF'  
-8 = '-8 DK'  
-1 = '-1 Inapplicable'  
-9 = '-9 Missing'  
1 = "less than $27,600,"  
2 = "$27,600-$41,999,"  
3 = "$42,000-$63,999,"  
4 = "$64,000-$107,999, or"  
5 = "$108,000 or more?"  
;  
VALUE SP30142W  
-7 = '-7 RF'  
-8 = '-8 DK'  
-1 = '-1 Inapplicable'  
-9 = '-9 Missing'  
1 = "less than $14,000,"  
2 = "$14,000-$21,999,"  
3 = "$22,000-$35,999,"  
4 = "$36,000-$48,999, or"  
5 = "$49,000 or more?"  
;  
VALUE INVENT
```

## SAS ALGORITHM FOR DEMENTIA

```
-7 = '-7 RF'  
-8 = '-8 DK'  
-1 = '-1 Inapplicable'  
-9 = '-9 Missing'  
104="104-Arthritis"  
107="107-Lung Disease"  
109="109-Dementia or Alzheimer's disease"  
110="110-Cancer"  
113="113-Other serious disease, illness, health problem"  
114="114-Knee surgery/problem"  
115="115-Hip repair or replacement/problem"  
117="117-Back or Spine Surgery/problem"  
121="121-Sleep Problems"  
201="201-Hearing problems"  
202="202-Sight problems"  
205="205-Pain"  
301="301-Breathing problems"  
302="302-Upper body strength movement"  
303="303-Lower body strength movement"  
304="304-Low energy"  
305="305-Balance or coordination problems"  
306="306-Walking distances"  
307="307-Climbing stairs"  
308="308-Lifting and carrying items"  
309="309-Kneeling"  
310="310-Bending"  
311="311-Reaching"  
312="312-Opening Jars"  
313="313-Grasping"  
401="401-Memory"  
501="501-Getting out of bed"  
502="502-Getting around inside"  
503="503-Getting outside"  
504="504-Travel/transportation"  
601="601-Eating"  
602="602-Washing"  
603="603-Toileting"  
604="604-Dressing"  
605="605-Grooming"  
701="701-Laundry"  
702="702-Shopping"  
703="703-Cooking"  
705="705-Money matters"  
706="706-Indoor cleaning and maintenance"  
707="707-Outdoor cleaning and maintenance"  
801="801-Medications"  
802="802-Doctor visits"  
804="804-Other medical self-care"  
1211="1211-Working"  
1442="1442-Walking/exercising pets"  
1451="1451-Vehicle repair and maintenance"  
1461="1461-Appliance tool, and toy use, set-up, repair, &  
maintenance"  
1462="1462-Computer use, set-up, repair, maintenance, and  
education"  
1473="1473-Household organization"  
1512="1512-Looking after someone else"
```

## SAS ALGORITHM FOR DEMENTIA

```
1611="1611-Socializing and communicating with others-in person"
1612="1612-Socializing and communication with others by talking
on telephone"
1613="1613-Attending or hosting party, wedding or social
occasions"
1614="1614-Reading and sorting through the mail"
1621="1621-Watch television and movies"
1631="1631-Games & puzzles"
1641="1641-Arts and crafts, collecting, and hobbies, making
music"
1642="1642-Reading"
1643="1642-Writing (personal, not on computer)"
1644="1644-Listening to recorded music or radio"
1711="1711-Playing/practicing sports or taking physical activity
class/lessons"
1712="1712-Walking/jogging for exercise or pleasure or working
out"
1713="1713-Other outdoor recreation activities"
1813="1813-Religious & spiritual volunteer activities"
1901="1901-Other, no existing code"
1998="1998-Don't know"
1999="1999-Refused/blank";
```

```
VALUE Imp_Flg
-7 = '-7 RF'
-8 = '-8 DK'
-1 = '-1 Inapplicable'
-9 = '-9 Missing'
0 = "0 No"
1 = "1 Yes" ;
```

```
VALUE DMH_GRP
1 = "1 Help started"
2 = "2 Help ended"
3 = "3 Help both interviews with gap"
4 = "4 Help both interviews with no gap"
5 = "5 Help between interviews only (month ended missing)"
6 = "6 No help either interview or between"
11 = "11 Help started (month started missing)"
21 = "21 Help ended (month ended missing)"
41 = "41 Help both interviews (DK whether gap)"
61 = "61 No help either interview (DK whether help between)"
-9 = "-9 Missing"
-1 = "-1 Inapplicable"
-999 = "-999 Not determined" ;
```

```
VALUE DMU_GRP
1 = "1 Use started"
2 = "2 Use ended"
3 = "3 Use both interviews with gap"
4 = "4 Use both interviews with no gap"
5 = "5 Use between interviews only (month ended missing)"
6 = "6 No use either interview or between"
11 = "11 Use started (month started missing)"
21 = "21 Use ended (month ended missing)"
41 = "41 Use both interviews (DK whether gap)"
61 = "61 No use either interview (DK whether use between)"
```



## SAS ALGORITHM FOR DEMENTIA

```
-9 = "-9 Missing"
-1 = "-1 Inapplicable"
-999 = "-999 Not determined" ;

VALUE DS_GRP
  1 = "1 Help started"
  2 = "2 Help ended"
  3 = "3 Help both interviews with gap"
  4 = "4 Help both interviews with no gap"
  5 = "5 Help between interviews only"
  6 = "6 No help either interview or between"
  11 = "11 Help started (month started missing)"
  21 = "21 Help ended (month ended missing)"
  41 = "41 Help both interviews (DK whether gap)"
  61 = "61 No help either interview (DK whether help between)"
  -9 = "-9 Missing"
  -1 = "-1 Inapplicable"
  -999 = "-999 Not determined" ;

VALUE DMDSINTV
  0 = "0 Less than 1 month"
  1 = "1 Month"
  2 = "2 Months"
  3 = "3 Months"
  4 = "4 Months"
  5 = "5 Months"
  6 = "6 Months"
  7 = "7 Months"
  8 = "8 Months"
  9 = "9 Months"
  10 = "10 Months"
  11 = "11 Months"
  12 = "12 Months"
  13 = "13 Months"
  14 = "14 Months"
  15 = "15 Months"
  16 = "16 Months"
  17 = "17 Months"
  18 = "18 Months"
  19 = "19 Months"
  20 = "20 Months"
  21 = "21 Months"
  22 = "22 Months"
  23 = "23 Months"
  24 = "24 Months"
  90 = "90 Last round disputed"
  -1 = "-1 Inapplicable"
  -7 = "-7 Refused"
  -8 = "-8 Dont know"
  -9 = "-9 Missing" ;

VALUE DMDS_DUR
  0 = "0 Less than 1 month"
  1 = "1 Month"
  2 = "2 Months"
  3 = "3 Months"
  4 = "4 Months"
```

## SAS ALGORITHM FOR DEMENTIA

```
    5 = "5 Months"
    6 = "6 Months"
    7 = "7 Months"
    8 = "8 Months"
    9 = "9 Months"
   10 = "10 Months"
   11 = "11 Months"
   12 = "12 Months"
   13 = "13 Months"
   14 = "14 Months"
   15 = "15 Months"
   16 = "16 Months"
   17 = "17 Months"
   90 = "90 Last round disputed"
  -1 = "-1 Inapplicable"
  -7 = "-7 Refused"
  -8 = "-8 Dont know"
  -9 = "-9 Missing"
 -10 = "-10 Not ascertained"
 -12 = "-12 Outside of range"
 -13 = "-13 None"
-999 = "-999 Not determined" ;

VALUE  DMDSFLG
  -1 = "-1 Inapplicable"
   1 = "1 No SP interview last round"
   2 = "2 Died and month death missing"
   3 = "3 Died <=1 month after last interview"
   4 = "4 Died 12-13 months after last interview"
   5 = "5 Died and not mobile (fl2notmobile=1)"
   6 = "6 Died and not alert (fl2notalert =1)"
   7 = "7 Skipped 1 or more help questions" ;

VALUE  DMDS3FLG
  -1 = "-1 Inapplicable"
   1 = "1 No SP interview last round"
   2 = "2 Died and month death missing"
   3 = "3 Died <=1 month after last interview"
   4 = "4 Died 12-13 months after last interview"
   5 = "5 Died and not mobile (fl3notmobile=1)"
   6 = "6 Died and not alert (fl3notalert =1)"
   7 = "7 Skipped 1 or more help questions" ;

VALUE  DMDS4FLG
  -1 = "-1 Inapplicable"
   1 = "1 No SP interview last round"
   2 = "2 Died and month death missing"
   3 = "3 Died <=1 month after last interview"
   4 = "4 Died 12-13 months after last interview"
   5 = "5 Died and not mobile (fl4notmobile=1)"
   6 = "6 Died and not alert (fl4notalert =1)"
   7 = "7 Skipped 1 or more help questions" ;

run;

/*=====*/

/* NHATS_Round_5_Combined_PROC_FORMAT_Statement.sas */
```

## SAS ALGORITHM FOR DEMENTIA

PROC FORMAT ;

```
VALUE release
  -1 = '-1 Inapplicable'
  1 = '1 Main Sample'
  2 = '2 Reserve Sample'
  9 = '9 New Release Sample';
```

```
VALUE STAT_DTa
  4 = " 4 April"
  5 = " 5 May"
  6 = " 6 June"
  7 = " 7 July"
  8 = " 8 August"
  9 = " 9 September"
 10 = "10 October"
 11 = "11 November"
 99 = "99 Prior to start of field work"
-1 = '-1 Inapplicable';
```

```
VALUE $DISP
  '10' = "10 Not Available "
  '11' = "11 Ready"
  '12' = "12 Started "
  '20' = "20 Final "
  '24' = "24 Not Required "
  '60' = "60 Complete "
  '61' = "61 Complete, NH facility"
  '62' = "62 Complete SP Deceased, Proxy Intv"
  '63' = "63 Complete SP, FQ not complete"
  '64' = "64 Complete FQ, SP not complete"
  '75' = "75 Physically/mentally unable to participate, no proxy"
  '76' = "76 Too ill to participate, no proxy"
  '77' = "77 Refusal, SP"
  '78' = "78 Language barrier"
  '79' = "79 Unable to locate"
  '80' = "80 Unavailable during field period"
  '82' = "82 Outside of PSU"
  '83' = "83 Ineligible"
  '85' = "85 Refusal, facility"
  '86' = "86 Deceased"
  '87' = "87 Refusal, proxy"
  '88' = "88 Work stopped" ;
```

```
VALUE DISP_a
  10 = "10 Not Available"
  11 = "11 Ready"
  12 = "12 Started"
  20 = "20 Final"
  24 = "24 Not Required"
  60 = "60 Complete"
  61 = "61 Complete, NH facility"
  62 = "62 Complete SP Deceased, Proxy Intv"
  63 = "63 Complete SP, FQ not complete"
  64 = "64 Complete FQ, SP not complete "
```

## SAS ALGORITHM FOR DEMENTIA

```
75 = "75 Physically/mentally unable to participate, no proxy"  
76 = "76 Too ill to participate, no proxy"  
77 = "77 Refusal, SP"  
78 = "78 Language barrier"  
79 = "79 Unable to locate"  
80 = "80 Unavailable during field period"  
82 = "82 Outside of PSU"  
83 = "83 Ineligible"  
85 = "85 Refusal, facility"  
86 = "86 Deceased"  
87 = "87 Refusal, proxy"  
88 = "88 Work stopped" ;  
  
VALUE DISP_  
10 = "10 Not Available"  
11 = "11 Ready"  
12 = "12 Started"  
20 = "20 Final"  
24 = "24 Not Required";  
  
VALUE DISP_F  
-1 = '-1 Inapplicable'  
10 = "10 Not Available"  
11 = "11 Ready"  
12 = "12 Started"  
20 = "20 Final"  
24 = "24 Not Required"  
60 = "60 Complete"  
61 = "61 Complete, NH facility"  
62 = "62 Complete SP Deceased, Proxy Intv"  
63 = "63 Complete SP, FQ not complete"  
64 = "64 Complete FQ, SP not complete "  
75 = "75 Physically/mentally unable to participate, no proxy"  
76 = "76 Too ill to participate, no proxy"  
77 = "77 Refusal, SP"  
78 = "78 Language barrier"  
79 = "79 Unable to locate"  
80 = "80 Unavailable during field period"  
81 = "81 Final deceased, new sample only"  
82 = "82 Outside of PSU"  
83 = "83 Ineligible"  
85 = "85 Refusal, facility"  
86 = "86 Deceased"  
87 = "87 Refusal, proxy"  
88 = "88 Work stopped"  
89 = "89 Final, Other Specify";  
  
VALUE RFDK  
-7 = '-7 RF'  
-8 = '-8 DK'  
-1 = '-1 Inapplicable'  
-9 = '-9 Missing';  
  
VALUE $RFDK_F  
'-7' = '-7 RF'  
'-8' = '-8 DK'  
'-1' = '-1 Inapplicable'
```

## SAS ALGORITHM FOR DEMENTIA

```
'-9' = '-9 Missing';
```

```
VALUE RFDK_F
```

```
-7 = '-7 RF'
```

```
-8 = '-8 DK'
```

```
-1 = '-1 Inapplicable'
```

```
-9 = '-9 Missing';
```

```
VALUE RFDK_I
```

```
0 = '0 No'
```

```
1 = '1 Yes'
```

```
-7 = '-7 RF'
```

```
-8 = '-8 DK'
```

```
-1 = '-1 Inapplicable'
```

```
-9 = '-9 Missing';
```

```
VALUE RFDK_B
```

```
-1 = '-1 Inapplicable'
```

```
1 = '1 Yes-Breakoff';
```

```
VALUE $RFDK_C
```

```
'-1' = '-1 Inapplicable'
```

```
'CL' = 'CL - Closing'
```

```
'EW' = 'EW - Economic Well-Being'
```

```
'FQ' = 'FQ - Facility Questionnaire'
```

```
'HL' = 'HL - Helper'
```

```
'HW' = 'HW - Height and Weight'
```

```
'IP' = 'IP - Insurance Plans'
```

```
'LF' = 'LF - Labor Force'
```

```
'PA' = 'PA - Participation'
```

```
'PE' = 'PE - Performance'
```

```
'WB' = 'WB - Well-being' ;
```

```
VALUE $RFDK_2C
```

```
'-1' = '-1 Inapplicable'
```

```
'-7' = '-7 RF'
```

```
'-8' = '-8 DK'
```

```
'-9' = '-9 Missing';
```

```
VALUE RFDK_Y
```

```
1 = '1 Yes'
```

```
-7 = '-7 RF'
```

```
-8 = '-8 DK'
```

```
-1 = '-1 Inapplicable'
```

```
-9 = '-9 Missing';
```

```
VALUE RFDK_YN
```

```
1 = '1 Yes'
```

```
2 = '2 No'
```

```
-7 = '-7 RF'
```

```
-8 = '-8 DK'
```

```
-1 = '-1 Inapplicable'
```

```
-9 = '-9 Missing';
```

```
VALUE DSTRP_G
```

```
-7 = '-7 RF'
```

```
-8 = '-8 DK'
```

## SAS ALGORITHM FOR DEMENTIA

```
-1 = '-1 Inapplicable'  
-9 = '-9 Missing'  
1 = '1 X condition and word color condition accuracy below threshold  
(less than .42)'  
2 = '2 word condition only below threshold (less than .42)'  
3 = '3 X condition and word color condition meet criteria for accuracy'  
4 = '4 fewer than 50% of X and word color condition trials answered'  
999 = '999 X condition only below threshold (less than .42)';
```

```
VALUE DSTRP_R
```

```
-7 = '-7 RF'  
-8 = '-8 DK'  
-1 = '-1 Inapplicable'  
-999 = '-999 Inapplicable'  
other = 'Values ranging between -.353 and 1.115';
```

```
VALUE DSTRP_M
```

```
-7 = '-7 RF'  
-8 = '-8 DK'  
-1 = '-1 Inapplicable'  
-999 = '-999 Inapplicable'  
other = 'Values ranging between -544.732 and 924.863';
```

```
VALUE FQ_4F
```

```
-7 = '-7 RF'  
-8 = '-8 DK'  
-1 = '-1 Inapplicable'  
-9 = '-9 Missing'  
    1='1 YES'  
    2='2 NO';
```

```
VALUE CHILDDC
```

```
1 = '1 CHILD DECEASED'  
-7 = '-7 RF'  
-8 = '-8 DK'  
-1 = '-1 Inapplicable'  
-9 = '-9 Missing';
```

```
VALUE W200001W
```

```
12 = "12 STARTED"  
20 = "20 COMPLETE"  
21 = "21 INELIGIBLE - NOT 65+" ;
```

```
VALUE W200008x
```

```
-7 = '-7 RF'  
-8 = '-8 DK'  
-1 = '-1 Inapplicable'  
-9 = '-9 Missing'  
1 = "1 UNDER 20"  
2 = "2 20-24"  
3 = "3 25-29"  
4 = "4 30-34"  
5 = "5 35-39"  
6 = "6 40-44"  
7 = "7 45-49"  
8 = "8 50-54"  
9 = "9 55-59"
```

## SAS ALGORITHM FOR DEMENTIA

```
10 = "10 60-64"  
11 = "11 65-69"  
12 = "12 70-74"  
13 = "13 75-79"  
14 = "14 80-84"  
15 = "15 85-89"  
16 = "16 90 +";  
  
VALUE W200009W  
-7 = '-7 RF'  
-8 = '-8 DK'  
-1 = '-1 Inapplicable'  
-9 = '-9 Missing'  
1 = "1 SAMPLE PERSON"  
2 = "2 SPOUSE/ PARTNER"  
3 = "3 DAUGHTER"  
4 = "4 SON"  
5 = "5 DAUGHTER-IN-LAW"  
6 = "6 SON-IN-LAW"  
7 = "7 STEPDAUGHTER"  
8 = "8 STEPSON"  
9 = "9 SISTER"  
10 = "10 BROTHER"  
11 = "11 SISTER-IN-LAW"  
12 = "12 BROTHER-IN-LAW"  
13 = "13 MOTHER"  
14 = "14 STEPMOTHER"  
15 = "15 MOTHER-IN-LAW"  
16 = "16 FATHER"  
17 = "17 STEPFATHER"  
18 = "18 FATHER-IN-LAW"  
19 = "19 GRANDDAUGHTER"  
20 = "20 GRANDSON"  
21 = "21 NIECE"  
22 = "22 NEPHEW"  
23 = "23 AUNT"  
24 = "24 UNCLE"  
25 = "25 COUSIN"  
26 = "26 STEPDAUGHTER'S SON/ DAUGHTER"  
27 = "27 STEPSON'S SON/ DAUGHTER"  
28 = "28 DAUGHTER-IN-LAW'S SON/ DAUGHTER"  
29 = "29 SON-IN-LAW'S SON/ DAUGHTER"  
30 = "30 BOARDER/RENTER"  
31 = "31 PAID AIDE/ HOUSEKEEPER/ EMPLOYEE"  
32 = "32 ROOMMATE"  
33 = "33 EX-WIFE/ EX-HUSBAND"  
34 = "34 BOYFRIEND/ GIRLFRIEND"  
35 = "35 NEIGHBOR"  
36 = "36 FRIEND"  
37 = "37 SOMEONE/SERVICE AT THE PLACE SP LIVES/LIVED"  
38 = "38 CO-WORKER"  
39 = "39 MINISTER, PRIEST, OR OTHER CLERGY"  
40 = "40 PSYCHIATRIST, PSYCHOLOGIST, COUNSELOR, OR THERAPIST"  
41 = "41 DECEASED SPOUSE/PARTNER"  
91 = "91 OTHER RELATIVE"  
92 = "92 OTHER NONRELATIVE" ;
```

## SAS ALGORITHM FOR DEMENTIA

```
VALUE W200002W
-7 = '-7 RF'
-8 = '-8 DK'
-1 = '-1 Inapplicable'
-9 = '-9 Missing'
 1 = "1 MALE"
 2 = "2 FEMALE";

VALUE W200005W
-7 = '-7 RF'
-8 = '-8 DK'
-1 = '-1 Inapplicable'
-9 = '-9 Missing'
 1 = "1 NO SCHOOLING COMPLETED"
 2 = "2 1ST-8TH GRADE"
 3 = "3 9TH-12TH GRADE (NO DIPLOMA)"
 4 = "4 HIGH SCHOOL GRADUATE (HIGH SCHOOL DIPLOMA OR EQUIVALENT)"
 5 = "5 VOCATIONAL, TECHNICAL, BUSINESS, OR TRADE SCHOOL CERTIFICATE OR
DIPLOMA (BEYOND HIGH SCHOOL LEVEL)"
 6 = "6 SOME COLLEGE BUT NO DEGREE"
 7 = "7 ASSOCIATE'S DEGREE"
 8 = "8 BACHELOR'S DEGREE"
 9 = "9 MASTER'S, PROFESSIONAL, OR DOCTORAL DEGREE" ;

VALUE W200010W
-7 = '-7 RF'
-8 = '-8 DK'
-1 = '-1 Inapplicable'
-9 = '-9 Missing'
 1 = "1 MARRIED"
 2 = "2 LIVING WITH A PARTNER"
 3 = "3 SEPARATED"
 4 = "4 DIVORCED"
 5 = "5 WIDOWED"
 6 = "6 NEVER MARRIED";

VALUE W200011W
-7 = '-7 RF'
-8 = '-8 DK'
-1 = '-1 Inapplicable'
-9 = '-9 Missing'
 1 = "1 YES"
 2 = "2 NO"
 7 = "7 PREVIOUSLY REPORTED" ;

VALUE W200012W
-7 = '-7 RF'
-8 = '-8 DK'
-1 = '-1 Inapplicable'
-9 = '-9 Missing'
 1 = "1 REGULAR"
 2 = "2 VARIED" ;

VALUE W200013W
-7 = '-7 RF'
-8 = '-8 DK'
-1 = '-1 Inapplicable'
-9 = '-9 Missing'
```



## SAS ALGORITHM FOR DEMENTIA

```
1 = "1 SP AND/OR FAMILY"  
2 = "2 GOVERNMENT PROGRAM"  
3 = "3 INSURANCE"  
91 = "91 OTHER (SPECIFY)" ;
```

```
VALUE W200015W  
-7 = '-7 RF'  
-8 = '-8 DK'  
-1 = '-1 Inapplicable'  
-9 = '-9 Missing'  
1='1 HOURLY'  
2='2 WEEKLY'  
3='3 MONTHLY'  
4='4 DID NOT PAY IN LAST MONTH'  
91 = "91 OTHER (SPECIFY)" ;
```

```
VALUE W200016W  
-7 = '-7 RF'  
-8 = '-8 DK'  
-1 = '-1 Inapplicable'  
-9 = '-9 Missing'  
1 = "1 MEDICAID"  
2 = "2 MEDICARE"  
3 = "3 STATE PROGRAM"  
91 = "91 OTHER (SPECIFY)" ;
```

```
VALUE W200018W  
-7 = '-7 RF'  
-8 = '-8 DK'  
-1 = '-1 Inapplicable'  
-9 = '-9 Missing'  
1 = "1 FREE-STANDING (DETACHED) SINGLE HOUSE"  
2 = "2 SINGLE HOUSE BUT ATTACHED TO OTHERS (ROW HOUSE, TOWNHOUSE, DUPLEX,  
TRIPLEX, OR TRIPLE DECKER)"  
3 = "3 MOBILE HOME OR TRAILER"  
4 = "4 MULTI-UNIT (2+) BUILDING"  
91 = "91 OTHER (SPECIFY)" ;
```

```
VALUE W200020W  
-7 = '-7 RF'  
-8 = '-8 DK'  
-1 = '-1 Inapplicable'  
-9 = '-9 Missing'  
1 = "1 HOME"  
2 = "2 MULTI-UNIT"  
3 = "3 OTHER" ;
```

```
VALUE W200021W  
-7 = '-7 RF'  
-8 = '-8 DK'  
-1 = '-1 Inapplicable'  
-9 = '-9 Missing'  
1 = "1 BUILDING HAS ONE FLOOR"  
2 = "2 BUILDING HAS MULTIPLE FLOORS" ;
```

```
VALUE W200022W  
-7 = '-7 RF'
```

## SAS ALGORITHM FOR DEMENTIA

```
-8 = '-8 DK'  
-1 = '-1 Inapplicable'  
-9 = '-9 Missing'  
1 = "1 HOME"  
2 = "2 APARTMENT"  
3 = "3 ROOM"  
4 = "4 UNIT"  
5 = "5 SUITE"  
6 = "6 SOMETHING ELSE (SPECIFY)" ;
```

VALUE W200030W

```
-7 = '-7 RF'  
-8 = '-8 DK'  
-1 = '-1 Inapplicable'  
-9 = '-9 Missing'  
1 = "1 SAMPLE PERSON (SP)"  
2 = "2 PROXY" ;
```

VALUE W200032W

```
-7 = '-7 RF'  
-8 = '-8 DK'  
-1 = '-1 Inapplicable'  
-9 = '-9 Missing'  
1 = "1 HOSPITAL"  
2 = "2 NURSING HOME/REHAB CENTER"  
91 = "91 OTHER (SPECIFY)" ;
```

VALUE W200035W

```
-1 = '-1 Inapplicable'  
-9 = '-9 Missing'  
1 = "1 SELF"  
2 = "2 SPOUSE/ PARTNER"  
3 = "3 DAUGHTER"  
4 = "4 SON"  
5 = "5 DAUGHTER-IN-LAW"  
6 = "6 SON-IN-LAW"  
7 = "7 STEPDAUGHTER"  
8 = "8 STEPSON"  
9 = "9 SISTER"  
10 = "10 BROTHER"  
11 = "11 SISTER-IN-LAW"  
12 = "12 BROTHER-IN-LAW"  
13 = "13 MOTHER"  
14 = "14 STEPMOTHER"  
15 = "15 MOTHER-IN-LAW"  
16 = "16 FATHER"  
17 = "17 STEPFATHER"  
18 = "18 FATHER-IN-LAW"  
19 = "19 GRANDDAUGHTER"  
20 = "20 GRANDSON"  
21 = "21 NIECE"  
22 = "22 NEPHEW"  
23 = "23 AUNT"  
24 = "24 UNCLE"  
25 = "25 COUSIN"  
26 = "26 STEPDAUGHTER'S SON/ DAUGHTER"  
27 = "27 STEPSON'S SON/ DAUGHTER"
```

## SAS ALGORITHM FOR DEMENTIA

```
28 = "28 DAUGHTER-IN-LAW'S SON/ DAUGHTER"  
29 = "29 SON-IN-LAW'S SON/ DAUGHTER"  
30 = "30 BOARDER/RENTER"  
31 = "31 PAID AIDE/ HOUSEKEEPER/ EMPLOYEE"  
32 = "32 ROOMMATE"  
33 = "33 EX-WIFE/ EX-HUSBAND"  
34 = "34 BOYFRIEND/ GIRLFRIEND"  
35 = "35 NEIGHBOR"  
36 = "36 FRIEND"  
37 = "37 SOMEONE/SERVICE FROM THE PLACE SP LIVES/DIED"  
38 = "38 CO-WORKER"  
39 = "39 MINISTER, PRIEST, OR OTHER CLERGY"  
40 = "40 PSYCHIATRIST, PSYCHOLOGIST, COUNSELOR, OR THERAPIST"  
91 = "91 OTHER RELATIVE"  
92 = "92 OTHER NONRELATIVE" ;
```

VALUE W200036W

```
-7 = '-7 RF'  
-8 = '-8 DK'  
-1 = '-1 Inapplicable'  
-9 = '-9 Missing'  
1 = "1 VERY FAMILIAR"  
2 = "2 SOMEWHAT FAMILIAR"  
3 = "3 A LITTLE FAMILIAR"  
4 = "4 NOT AT ALL FAMILIAR" ;
```

VALUE W200037W

```
-7 = '-7 RF'  
-8 = '-8 DK'  
-1 = '-1 Inapplicable'  
-9 = '-9 Missing'  
1 = "1 YES, SAME ADDRESS"  
2 = "2 NO, DIFFERENT ADDRESS"  
3 = "3 YES, SAME ADDRESS WITH MINOR CORRECTIONS" ;
```

VALUE W200038W

```
-7 = '-7 RF'  
-8 = '-8 DK'  
-1 = '-1 Inapplicable'  
-9 = '-9 Missing'  
1 = "1 JANUARY"  
2 = "2 FEBRUARY"  
3 = "3 MARCH"  
4 = "4 APRIL"  
5 = "5 MAY"  
6 = "6 JUNE"  
7 = "7 JULY"  
8 = "8 AUGUST"  
9 = "9 SEPTEMBER"  
10 = "10 OCTOBER"  
11 = "11 NOVEMBER"  
12 = "12 DECEMBER" ;
```

VALUE W200039W

```
-7 = '-7 RF'  
-8 = '-8 DK'  
-1 = '-1 Inapplicable'
```

## SAS ALGORITHM FOR DEMENTIA

```
-9 = '-9 Missing'  
1 = "1 2011"  
2 = "2 2012"  
3 = "3 YEAR2013"  
4 = "4 YEAR2014"  
5 = "5 YEAR2015"  
6 = "6 YEAR2016"  
7 = "7 YEAR2017"  
8 = "8 YEAR2018"  
9 = "9 YEAR2019"  
10 = "10 YEAR2020" ;
```

VALUE W200040W

```
-7 = '-7 RF'  
-8 = '-8 DK'  
-1 = '-1 Inapplicable'  
-9 = '-9 Missing'  
1 = "1 2011"  
2 = "2 2012" ;
```

VALUE W200041W

```
-7 = '-7 RF'  
-8 = '-8 DK'  
-1 = '-1 Inapplicable'  
-9 = '-9 Missing'  
1 = "1 AT SPS OR SOMEONE ELSE'S HOME"  
2 = "2 IN A HOSPITAL"  
3 = "3 IN A NURSING HOME"  
4 = "4 IN A HOSPICE RESIDENCE"  
5 = "5 IN TRANSIT (AMBULANCE TO HOSPITAL)"  
91 = "91 SOMEWHERE ELSE (SPECIFY)";
```

VALUE W200042W

```
-7 = '-7 RF'  
-8 = '-8 DK'  
-1 = '-1 Inapplicable'  
-9 = '-9 Missing'  
1 = "1 SP'S HOME"  
2 = "2 SOMEONE ELSE'S HOME" ;
```

VALUE W200043W

```
-7 = '-7 RF'  
-8 = '-8 DK'  
-1 = '-1 Inapplicable'  
-9 = '-9 Missing'  
1 = "1 INTENSIVE CARE UNIT"  
2 = "2 PALLIATIVE CARE UNIT"  
3 = "3 INPATIENT HOSPICE UNIT"  
4 = "4 EMERGENCY ROOM"  
5 = "5 ANOTHER KIND OF UNIT" ;
```

VALUE W200044W

```
-7 = '-7 RF'  
-8 = '-8 DK'  
-1 = '-1 Inapplicable'  
-9 = '-9 Missing'  
1 = "1 HOSPICE AT A HOSPITAL"
```

## SAS ALGORITHM FOR DEMENTIA

```
2 = "2 HOSPICE AT A NURSING HOME"  
3 = "3 RESIDENTIAL HOSPICE"  
4 = "4 OTHER HOSPICE" ;  
  
VALUE W200045W  
-7 = '-7 RF'  
-8 = '-8 DK'  
-1 = '-1 Inapplicable'  
-9 = '-9 Missing'  
1 = "1 DAYS"  
2 = "2 WEEKS"  
3 = "3 MONTHS"  
4 = "4 YEARS" ;  
  
VALUE W200046W  
-7 = '-7 RF'  
-8 = '-8 DK'  
-1 = '-1 Inapplicable'  
-9 = '-9 Missing'  
1 = "1 AT SP'S HOME"  
2 = "2 IN A HOSPITAL"  
3 = "3 IN A NURSING HOME"  
4 = "4 IN A HOSPICE RESIDENCE"  
91 = "91 SOMEWHERE ELSE (SPECIFY)" ;  
  
VALUE W200047W  
-7 = '-7 RF'  
-8 = '-8 DK'  
-1 = '-1 Inapplicable'  
-9 = '-9 Missing'  
1 = "1 EVERY DAY"  
2 = "2 MOST DAYS"  
3 = "3 SOME DAYS"  
4 = "4 RARELY"  
5 = "5 NOT AT ALL" ;  
  
VALUE W200048W  
-7 = '-7 RF'  
-8 = '-8 DK'  
-1 = '-1 Inapplicable'  
-9 = '-9 Missing'  
1 = "1 LESS THAN WAS NEEDED"  
2 = "2 MORE THAN WAS NEEDED"  
3 = "3 ABOUT RIGHT AMOUNT" ;  
  
VALUE W200049W  
-7 = '-7 RF'  
-8 = '-8 DK'  
-1 = '-1 Inapplicable'  
-9 = '-9 Missing'  
1 = "1 YES"  
2 = "2 NO"  
3 = "3 DOES NOT APPLY/NO CARE IN LAST MONTH OF LIFE" ;  
  
VALUE W200050W  
-7 = '-7 RF'  
-8 = '-8 DK'
```

## SAS ALGORITHM FOR DEMENTIA

```
-1 = '-1 Inapplicable'  
-9 = '-9 Missing'  
1 = "1 ALWAYS"  
2 = "2 USUALLY"  
3 = "3 SOMETIMES"  
4 = "4 NEVER"  
5 = "5 DOES NOT APPLY/NO CARE IN LAST MONTH OF LIFE" ;
```

VALUE W200051W

```
-7 = '-7 RF'  
-8 = '-8 DK'  
-1 = '-1 Inapplicable'  
-9 = '-9 Missing'  
1 = "1 EXCELLENT"  
2 = "2 VERY GOOD"  
3 = "3 GOOD"  
4 = "4 FAIR"  
5 = "5 POOR" ;
```

VALUE W200052W

```
-7 = '-7 RF'  
-8 = '-8 DK'  
-1 = '-1 Inapplicable'  
-9 = '-9 Missing'  
1 = "1 NOT AT ALL"  
2 = "2 SEVERAL DAYS"  
3 = "3 MORE THAN HALF THE DAYS"  
4 = "4 NEARLY EVERY DAY" ;
```

VALUE W200053W

```
-7 = '-7 RF'  
-8 = '-8 DK'  
-1 = '-1 Inapplicable'  
-9 = '-9 Missing'  
1 = "1 EVERY NIGHT (7 NIGHTS A WEEK)"  
2 = "2 MOST NIGHTS (5-6 NIGHTS A WEEK)"  
3 = "3 SOME NIGHTS (2-4 NIGHTS A WEEK)"  
4 = "4 RARELY (ONCE A WEEK OR LESS)"  
5 = "5 NEVER" ;
```

VALUE W200054W

```
-7 = '-7 RF'  
-8 = '-8 DK'  
-1 = '-1 Inapplicable'  
-9 = '-9 Missing'  
1 = "1 EVERY NIGHT (7 NIGHTS A WEEK)"  
2 = "2 MOST NIGHTS (5-6 NIGHTS A WEEK)"  
3 = "3 SOME NIGHTS (2-4 NIGHTS A WEEK)"  
4 = "4 RARELY (ONCE A WEEK OR LESS)"  
5 = "5 NEVER"  
7 = "7 DON'T WAKE UP/NOT A PROBLEM" ;
```

VALUE W200055W

```
-7 = '-7 RF'  
-8 = '-8 DK'  
-1 = '-1 Inapplicable'  
-9 = '-9 Missing'
```

## SAS ALGORITHM FOR DEMENTIA

```
1 = "1 PRIVATE RESIDENCE"  
2 = "2 A GROUP HOME, BOARD AND CARE, OR SUPERVISED HOUSING"  
3 = "3 ASSISTED LIVING FACILITY OR CONTINUING CARE RETIREMENT COMMUNITY  
(CCRC) "  
4 = "4 RELIGIOUS GROUP QUARTERS"  
91 = "91 OTHER (SPECIFY)" ;
```

```
VALUE W200056W  
-7 = '-7 RF'  
-8 = '-8 DK'  
-1 = '-1 Inapplicable'  
-9 = '-9 Missing'  
1 = "1 YES"  
2 = "2 NO"  
7 = "7 PLACE DOES NOT HAVE A NAME" ;
```

```
VALUE W200057W  
-7 = '-7 RF'  
-8 = '-8 DK'  
-1 = '-1 Inapplicable'  
-9 = '-9 Missing'  
1 = "1 APARTMENT"  
2 = "2 ROOM"  
3 = "3 UNIT"  
4 = "4 SUITE"  
91 = "91 SOMETHING ELSE (SPECIFY)" ;
```

```
VALUE W200058W  
-7 = '-7 RF'  
-8 = '-8 DK'  
-1 = '-1 Inapplicable'  
-9 = '-9 Missing'  
1 = "1 YES"  
2 = "2 NO, DIFFERENT PERSON"  
3 = "3 NO, NAME MISPELLED" ;
```

```
VALUE W200060W  
-7 = '-7 RF'  
-8 = '-8 DK'  
-1 = '-1 Inapplicable'  
-9 = '-9 Missing'  
1 = "1 PRIVATE RESIDENCE"  
2 = "2 A GROUP HOME, BOARD AND CARE, OR SUPERVISED HOUSING"  
3 = "3 ASSISTED LIVING FACILITY OR CONTINUING CARE RETIREMENT COMMUNITY  
(CCRC) "  
5 = "5 NURSING HOME"  
91 = "91 OTHER (SPECIFY)" ;
```

```
VALUE W200061W  
-7 = '-7 RF'  
-8 = '-8 DK'  
-1 = '-1 Inapplicable'  
-9 = '-9 Missing'  
1 = "1 SEPARATION OR DIVORCE"  
2 = "2 DECEASED"  
3 = "3 MOVED ELSEWHERE"  
5 = "5 LAST INTERVIEW INFORMATION INCORRECT"
```

## SAS ALGORITHM FOR DEMENTIA

```
      8 = "8 OTHER REASON" ;

VALUE W200067W
-7 = '-7 RF'
-8 = '-8 DK'
-1 = '-1 Inapplicable'
-9 = '-9 Missing'
 1 = "1 COMMON OR SHARED ENTRANCE"
 2 = "2 ENTRANCE DIRECTLY INTO HOME" ;

VALUE W200068W
-7 = '-7 RF'
-8 = '-8 DK'
-1 = '-1 Inapplicable'
-9 = '-9 Missing'
 1 = "1"
 2 = "2"
 3 = "3"
 4 = "4+" ;

VALUE W200069W
-7 = '-7 RF'
-8 = '-8 DK'
-1 = '-1 Inapplicable'
-9 = '-9 Missing'
 1 = "1 ALL ITEMS HERE"
 2 = "2 ADDED ONE OR MORE ITEMS" ;

VALUE W200070W
-7 = '-7 RF'
-8 = '-8 DK'
-1 = '-1 Inapplicable'
-9 = '-9 Missing'
 1 = "1 MORE THAN $500"
 2 = "2 LESS THAN $500"
 3 = "3 JUST ABOUT $500" ;

VALUE W200071W
-7 = '-7 RF'
-8 = '-8 DK'
-1 = '-1 Inapplicable'
-9 = '-9 Missing'
 1 = "1 MORE THAN $1,000"
 2 = "2 LESS THAN $1,000"
 3 = "3 JUST ABOUT $1,000" ;

VALUE W200072W
-7 = '-7 RF'
-8 = '-8 DK'
-1 = '-1 Inapplicable'
-9 = '-9 Missing'
 1 = "1 MORE THAN $100"
 2 = "2 LESS THAN $100"
 3 = "3 JUST ABOUT $100" ;

VALUE W200073W
-7 = '-7 RF'
```



## SAS ALGORITHM FOR DEMENTIA

```
-8 = '-8 DK'  
-1 = '-1 Inapplicable'  
-9 = '-9 Missing'  
1 = "1 YES"  
2 = "2 NO"  
7 = "7 YES, DOESNT KNOW HOW TO USE A COMPUTER" ;
```

```
VALUE W200074W
```

```
-7 = '-7 RF'  
-8 = '-8 DK'  
-1 = '-1 Inapplicable'  
-9 = '-9 Missing'  
1 = "1 MOST DAYS"  
2 = "2 SOME DAYS"  
3 = "3 RARELY" ;
```

```
VALUE W200076W
```

```
-7 = '-7 RF'  
-8 = '-8 DK'  
-1 = '-1 Inapplicable'  
-9 = '-9 Missing'  
1 = "1 YES"  
2 = "2 NO"  
7 = "7 DEAF" ;
```

```
VALUE W200077W
```

```
-7 = '-7 RF'  
-8 = '-8 DK'  
-1 = '-1 Inapplicable'  
-9 = '-9 Missing'  
1 = "1 YES"  
2 = "2 NO"  
7 = "7 BLIND" ;
```

```
VALUE W200078W
```

```
-7 = '-7 RF'  
-8 = '-8 DK'  
-1 = '-1 Inapplicable'  
-9 = '-9 Missing'  
1 = "1 EVERY DAY (7 DAYS A WEEK)"  
2 = "2 MOST DAYS (5-6 DAYS A WEEK)"  
3 = "3 SOME DAYS (2-4 DAYS A WEEK)"  
4 = "4 RARELY (ONCE A WEEK OR LESS)"  
5 = "5 NEVER" ;
```

```
VALUE W200080W
```

```
-7 = '-7 RF'  
-8 = '-8 DK'  
-1 = '-1 Inapplicable'  
-9 = '-9 Missing'  
1 = "1 YES, A CHANGE"  
2 = "2 NO, NO CHANGE"  
3 = "3 DEMENTIA/ALZHEIMER'S REPORTED BY PROXY" ;
```

```
VALUE W200081W
```

```
-7 = '-7 RF'  
-8 = '-8 DK'
```

## SAS ALGORITHM FOR DEMENTIA

```
-1 = '-1 Inapplicable'  
-9 = '-9 Missing'  
1 = "1 SP HAS DEMENTIA/ALZHEIMER'S/ NOT ABLE"  
2 = "2 SP IS UNABLE TO SPEAK"  
3 = "3 SP IS UNABLE TO HEAR"  
4 = "4 SP REFUSED"  
5 = "5 PROXY REFUSED"  
6 = "6 SP NOT PRESENT"  
7 = "7 SP TOO ILL"  
8 = "8 SP LANGUAGE BARRIER"  
91 = "91 OTHER (SPECIFY)" ;
```

VALUE W200082W

```
-7 = '-7 RF'  
-8 = '-8 DK'  
-1 = '-1 Inapplicable'  
-9 = '-9 Missing'  
1 = "1 MUCH BETTER"  
2 = "2 BETTER"  
3 = "3 SAME"  
4 = "4 WORSE"  
5 = "5 MUCH WORSE" ;
```

VALUE W200083W

```
-7 = '-7 RF'  
-8 = '-8 DK'  
-1 = '-1 Inapplicable'  
-9 = '-9 Missing'  
1 = "1 YES"  
2 = "2 NO/DON'T KNOW" ;
```

VALUE W200084W

```
-7 = '-7 RF'  
-8 = '-8 DK'  
-1 = '-1 Inapplicable'  
-9 = '-9 Missing'  
1 = "1 CONTINUE WITH ACTIVITY"  
2 = "2 SP REFUSES ACTIVITY" ;
```

VALUE W200085W

```
-1 = '-1 Inapplicable'  
-9 = '-9 Missing'  
1 = "Word[1]"  
2 = "Word[2]"  
3 = "Word[3]"  
4 = "Word[4]"  
5 = "Word[5]"  
6 = "Word[6]"  
7 = "Word[7]"  
8 = "Word[8]"  
9 = "Word[9]"  
10 = "Word[10]"  
91 = "91 NO WORDS REMEMBERED"  
92 = "92 REFUSED" ;
```

VALUE W200086W

```
-7 = '-7 RF'
```

## SAS ALGORITHM FOR DEMENTIA

```
-8 = '-8 DK'  
-1 = '-1 Inapplicable'  
-9 = '-9 Missing'  
1 = "1 DIFFICULTY HEARING ANY OF THE WORDS"  
2 = "2 INTERRUPTION OCCURRED WHILE LIST WAS BEING READ"  
91 = "91 OTHER PROBLEM (SPECIFY)"  
92 = "92 NO PROBLEMS OCCURRED"  
97 = "97 SP REFUSED WORD RECALL TASK" ;
```

VALUE W200087W

```
-1 = '-1 Inapplicable'  
-9 = '-9 Missing'  
1 = "1 SP ATTEMPTED CLOCK DRAWING"  
2 = "2 SP DID NOT ATTEMPT CLOCK DRAWING"  
97 = "3 SP REFUSED CLOCK DRAWING" ;
```

VALUE W200089W

```
-7 = '-7 RF'  
-8 = '-8 DK'  
-1 = '-1 Inapplicable'  
-9 = '-9 Missing'  
1 = "1 EVERY DAY (7 DAYS A WEEK)"  
2 = "2 MOST DAYS (5-6 DAYS A WEEK)"  
3 = "3 SOME DAYS (2-4 DAYS A WEEK)"  
4 = "4 RARELY (ONCE A WEEK OR LESS)"  
5 = "5 NEVER" ;
```

VALUE W200090W

```
-7 = '-7 RF'  
-8 = '-8 DK'  
-1 = '-1 Inapplicable'  
-9 = '-9 Missing'  
1 = "1 EVERY TIME"  
2 = "2 MOST TIMES"  
3 = "3 SOMETIMES"  
4 = "4 RARELY"  
5 = "5 NEVER" ;
```

VALUE W200092W

```
-7 = '-7 RF'  
-8 = '-8 DK'  
-1 = '-1 Inapplicable'  
-9 = '-9 Missing'  
1 = "1 MOST TIMES"  
2 = "2 SOMETIMES"  
3 = "3 RARELY"  
4 = "4 NEVER" ;
```

VALUE W200093W

```
-7 = '-7 RF'  
-8 = '-8 DK'  
-1 = '-1 Inapplicable'  
-9 = '-9 Missing'  
1 = "1 NONE"  
2 = "2 A LITTLE"  
3 = "3 SOME"  
4 = "4 A LOT" ;
```

## SAS ALGORITHM FOR DEMENTIA

```
VALUE W200094W
-7 = '-7 RF'
-8 = '-8 DK'
-1 = '-1 Inapplicable'
-9 = '-9 Missing'
1 = "1 MORE OFTEN"
2 = "2 LESS OFTEN"
3 = "3 ABOUT THE SAME" ;

VALUE W200095W
-7 = '-7 RF'
-8 = '-8 DK'
-1 = '-1 Inapplicable'
-9 = '-9 Missing'
1 = "1 JANUARY"
2 = "2 FEBRUARY"
3 = "3 MARCH"
4 = "4 APRIL"
5 = "5 MAY"
6 = "6 JUNE"
7 = "7 JULY"
8 = "8 AUGUST"
9 = "9 SEPTEMBER"
10 = "10 OCTOBER"
11 = "11 NOVEMBER"
12 = "12 DECEMBER"
90 = "90 LAST INTERVIEW INFORMATION INCORRECT" ;

VALUE W200096W
-7 = '-7 RF'
-8 = '-8 DK'
-1 = '-1 Inapplicable'
-9 = '-9 Missing'
1 = "1 YES"
2 = "2 NO"
90 = "90 LAST INTERVIEW INFORMATION INCORRECT" ;

VALUE W200097W
-7 = '-7 RF'
-8 = '-8 DK'
-1 = '-1 Inapplicable'
-9 = '-9 Missing'
1 = "1 YES"
2 = "2 NO / NO LONGER DRIVE" ;

VALUE W200098W
-7 = '-7 RF'
-8 = '-8 DK'
-1 = '-1 Inapplicable'
-9 = '-9 Missing'
1 = "1 YES"
2 = "2 NO"
7 = "7 NO, NO RAIN OR BAD WEATHER" ;

VALUE W200099W
-7 = '-7 RF'
```

## SAS ALGORITHM FOR DEMENTIA

```
-8 = '-8 DK'
-1 = '-1 Inapplicable'
-9 = '-9 Missing'
 1 = "1 ALWAYS DID IT BY SELF"
 2 = "2 ALWAYS DID IT TOGETHER WITH SOMEONE ELSE"
 3 = "3 SOMEONE ELSE ALWAYS DID IT"
 4 = "4 IT VARIED (MORE THAN ONE WAY)"
 5 = "5 NOT DONE IN LAST MONTH" ;

VALUE W200102W
-7 = '-7 RF'
-8 = '-8 DK'
-1 = '-1 Inapplicable'
-9 = '-9 Missing'
 1 = "1 MORE OFTEN"
 2 = "2 LESS OFTEN"
 3 = "3 SAME" ;

VALUE W200106W
-7 = '-7 RF'
-8 = '-8 DK'
-1 = '-1 Inapplicable'
-9 = '-9 Missing'
 1 = "1 YES"
 2 = "2 NO"
 7 = "7 ALWAYS FED THROUGH IV OR TUBE" ;

VALUE W200107W
-7 = '-7 RF'
-8 = '-8 DK'
-1 = '-1 Inapplicable'
-9 = '-9 Missing'
 1 = "1 EVERY TIME"
 2 = "2 MOST TIMES"
 3 = "3 SOMETIMES"
 4 = "4 RARELY" ;

VALUE W200109W
-7 = '-7 RF'
-8 = '-8 DK'
-1 = '-1 Inapplicable'
-9 = '-9 Missing'
 1 = "1 SHOWERING"
 2 = "2 TAKING BATHS"
 3 = "3 WASHING UP SOME OTHER WAY" ;

VALUE W200114W
-7 = '-7 RF'
-8 = '-8 DK'
-1 = '-1 Inapplicable'
-9 = '-9 Missing'
 1 = "1 VERY IMPORTANT"
 2 = "2 SOMEWHAT IMPORTANT"
 3 = "3 NOT SO IMPORTANT" ;

VALUE W200115W
-7 = '-7 RF'
```

## SAS ALGORITHM FOR DEMENTIA

```
-8 = '-8 DK'  
-1 = '-1 Inapplicable'  
-9 = '-9 Missing'  
1 = "1 YES"  
2 = "2 NO"  
95 = "95 NO ACTIVITY LISTED" ;
```

```
VALUE W200116W
```

```
-7 = '-7 RF'  
-8 = '-8 DK'  
-1 = '-1 Inapplicable'  
-9 = '-9 Missing'  
1 = "1 LEFT"  
2 = "2 RIGHT"  
3 = "3 BOTH" ;
```

```
VALUE W200117W
```

```
-7 = '-7 RF'  
-8 = '-8 DK'  
-1 = '-1 Inapplicable'  
-9 = '-9 Missing'  
1 = "1 LEFT SIDE"  
2 = "2 RIGHT SIDE"  
3 = "3 BOTH SIDES" ;
```

```
VALUE W200118W
```

```
-7 = '-7 RF'  
-8 = '-8 DK'  
-1 = '-1 Inapplicable'  
-9 = '-9 Missing'  
1 = "1 ONE SIDE"  
2 = "2 BOTH SIDES" ;
```

```
VALUE W200119W
```

```
-7 = '-7 RF'  
-8 = '-8 DK'  
-1 = '-1 Inapplicable'  
-9 = '-9 Missing'  
1 = "1 RECEIVE ALL TREATMENTS"  
2 = "2 STOP/REJECT ALL TREATMENTS" ;
```

```
VALUE W200120W
```

```
-7 = '-7 RF'  
-8 = '-8 DK'  
-1 = '-1 Inapplicable'  
-9 = '-9 Missing'  
1 = "1 LIVING IN THEIR OWN HOME WITH HELP FROM FRIENDS AND FAMILY"  
2 = "2 LIVING IN THEIR OWN HOME WITH HELP FROM SOMEONE PAID TO COME IN"  
3 = "3 LIVING WITH AN ADULT CHILD"  
4 = "4 LIVING IN AN ASSISTED LIVING FACILITY OR CONTINUING CARE
```

```
RESIDENCE"
```

```
5 = "5 LIVING IN A NURSING HOME" ;
```

```
VALUE W200121W
```

```
-7 = '-7 RF'  
-8 = '-8 DK'  
-1 = '-1 Inapplicable'
```

## SAS ALGORITHM FOR DEMENTIA

```
-9 = '-9 Missing'  
1 = "1 YES"  
2 = "2 NO"  
3 = "3 DOESNT HAVE ANY MONEY TO PAY A CAREGIVER"  
4 = "4 WOULD NOT USE A PAID CAREGIVER" ;
```

VALUE W200122W

```
-7 = '-7 RF'  
-8 = '-8 DK'  
-1 = '-1 Inapplicable'  
-9 = '-9 Missing'  
1 = "1 MAKE DECISIONS WITHOUT MUCH ADVICE FROM THEM"  
2 = "2 GET THEIR ADVICE AND THEN MAKE DECISIONS"  
3 = "3 MAKE DECISIONS TOGETHER"  
4 = "4 LEAVE DECISIONS UP TO THEM" ;
```

VALUE W200123W

```
-7 = '-7 RF'  
-8 = '-8 DK'  
-1 = '-1 Inapplicable'  
-9 = '-9 Missing'  
1 = "1 HANDLE MOSTLY BY SELF"  
2 = "2 HANDLE TOGETHER WITH FAMILY OR CLOSE FRIENDS"  
3 = "3 FAMILY OR CLOSE FRIENDS MOSTLY HANDLE THESE THINGS"  
4 = "4 IT VARIES" ;
```

VALUE W200124W

```
-7 = '-7 RF'  
-8 = '-8 DK'  
-1 = '-1 Inapplicable'  
-9 = '-9 Missing'  
1 = "1 NEVER"  
2 = "2 RARELY"  
3 = "3 SOMETIMES"  
4 = "4 OFTEN" ;
```

VALUE W200126W

```
-7 = '-7 RF'  
-8 = '-8 DK'  
-1 = '-1 Inapplicable'  
-9 = '-9 Missing'  
1 = "1 AGREE A LOT"  
2 = "2 AGREE A LITTLE"  
3 = "3 DO NOT AGREE" ;
```

VALUE W200127W

```
-7 = '-7 RF'  
-8 = '-8 DK'  
-1 = '-1 Inapplicable'  
-9 = '-9 Missing'  
1 = "1 AGREE A LOT"  
2 = "2 AGREE A LITTLE"  
3 = "3 AGREE NOT AT ALL" ;
```

VALUE W200129W

```
-7 = '-7 RF'  
-8 = '-8 DK'
```

## SAS ALGORITHM FOR DEMENTIA

```
-1 = '-1 Inapplicable'  
-9 = '-9 Missing'  
1 = "1 less than $1,000,"  
2 = "2 $1,000 to less than $2,000,"  
3 = "3 $2,000 to less than $3,000,"  
4 = "4 $3,000 to less than $5,000, or"  
5 = "5 $5,000 or more?" ;
```

VALUE W200131W

```
-7 = '-7 RF'  
-8 = '-8 DK'  
-1 = '-1 Inapplicable'  
-9 = '-9 Missing'  
1 = "1 YES"  
2 = "2 NO"  
3 = "3 RETIRED/DON'T WORK ANYMORE" ;
```

VALUE W200132W

```
-7 = '-7 RF'  
-8 = '-8 DK'  
-1 = '-1 Inapplicable'  
-9 = '-9 Missing'  
1 = "1 EVERY WEEK"  
2 = "2 EVERY TWO WEEKS"  
3 = "3 TWO TIMES A MONTH"  
4 = "4 ONCE A MONTH"  
5 = "5 DAILY"  
91 = "91 OTHER SCHEDULE (SPECIFY)" ;
```

VALUE W200133W

```
-7 = '-7 RF'  
-8 = '-8 DK'  
-1 = '-1 Inapplicable'  
-9 = '-9 Missing'  
1 = "1 OWN"  
2 = "2 RENT"  
3 = "3 SOME OTHER ARRANGEMENT" ;
```

VALUE W200134W

```
-7 = '-7 RF'  
-8 = '-8 DK'  
-1 = '-1 Inapplicable'  
-9 = '-9 Missing'  
1 = "1 PAID OFF"  
2 = "2 STILL MAKE PAYMENTS"  
3 = "3 REVERSE MORTGAGE" ;
```

VALUE W200135W

```
-7 = '-7 RF'  
-8 = '-8 DK'  
-1 = '-1 Inapplicable'  
-9 = '-9 Missing'  
1 = "1 less than $250,"  
2 = "2 $250-$499,"  
3 = "3 $500-$999, or"  
4 = "4 $1,000 or more?" ;
```

VALUE W500135W



## SAS ALGORITHM FOR DEMENTIA

```
-7 = '-7 RF'
-8 = '-8 DK'
-1 = '-1 Inapplicable'
-9 = '-9 Missing'
1 = "1 less than $250"
2 = "2 $250 to less than $500"
3 = "3 $500 to less than $1,000"
4 = "4 $1,000 to less than $3,000"
5 = "5 $3,000 to less than $5,000"
6 = "6 $5,000 or more?" ;

VALUE W200136W
-7 = '-7 RF'
-8 = '-8 DK'
-1 = '-1 Inapplicable'
-9 = '-9 Missing'
1 = "1 5 YEARS"
2 = "2 10 YEARS"
3 = "3 LONGER THAN 10 YEARS" ;

VALUE W200137W
-7 = '-7 RF'
-8 = '-8 DK'
-1 = '-1 Inapplicable'
-9 = '-9 Missing'
1 = "1 less than $50,000,"
2 = "2 between $50,000 and $100,000, or"
3 = "3 over $100,000?" ;

VALUE W200138W
-7 = '-7 RF'
-8 = '-8 DK'
-1 = '-1 Inapplicable'
-9 = '-9 Missing'
1 = "1 less than $50,000,"
2 = "2 $50,000-$74,999,"
3 = "3 $75,000-$99,999,"
4 = "4 $100,000-$199,999,"
5 = "5 $200,000-$299,999,"
6 = "6 $300,000-$499,999,"
7 = "7 $500,000-$749,999, or"
8 = "8 $750,000 or more?" ;

VALUE W200139W
-7 = '-7 RF'
-8 = '-8 DK'
-1 = '-1 Inapplicable'
-9 = '-9 Missing'
1 = "1 PAY OFF BALANCE"
2 = "2 PAY MINIMUM"
3 = "3 PAY MORE THAN MINIMUM, BUT NOT ENTIRE BALANCE"
4 = "4 DON'T HAVE ANY CREDIT CARDS" ;

VALUE W200140W
-7 = '-7 RF'
-8 = '-8 DK'
-1 = '-1 Inapplicable'
-9 = '-9 Missing'
```

## SAS ALGORITHM FOR DEMENTIA

```
1 = "1 less than $1,000,"  
2 = "2 $1,000 - $1,999,"  
3 = "3 $2,000 - $3,999,"  
4 = "4 $4,000 - $5,999,"  
5 = "5 $6,000 - $9,999,"  
6 = "6 $10,000 - $19,999, or"  
7 = "7 $20,000 or more?" ;
```

VALUE W200141W

```
-7 = '-7 RF'  
-8 = '-8 DK'  
-1 = '-1 Inapplicable'  
-9 = '-9 Missing'  
1 = "1 MOST"  
2 = "2 SOME"  
3 = "3 A LITTLE" ;
```

VALUE W200142W

```
-7 = '-7 RF'  
-8 = '-8 DK'  
-1 = '-1 Inapplicable'  
-9 = '-9 Missing'  
1 = "1 less than $500,"  
2 = "2 $500 - $999,"  
3 = "3 $1,000 - $1,999,"  
4 = "4 $2,000 - $3,999,"  
5 = "5 $4,000 - $5,999,"  
6 = "6 $6,000 - $9,999,"  
7 = "7 $10,000 - $19,999, or"  
8 = "8 $20,000 or more?" ;
```

VALUE W200146W

```
-7 = '-7 RF'  
-8 = '-8 DK'  
-1 = '-1 Inapplicable'  
-9 = '-9 Missing'  
1 = "1 NEARLY EVERY DAY"  
2 = "2 MORE THAN HALF THE DAYS"  
3 = "3 SEVERAL DAYS (LESS THAN HALF)"  
4 = "4 A FEW DAYS" ;
```

VALUE W200147W

```
-7 = '-7 RF'  
-8 = '-8 DK'  
-1 = '-1 Inapplicable'  
-9 = '-9 Missing'  
1 = "1 INCLUDED"  
2 = "2 EXTRA CHARGE" ;
```

VALUE W200148W

```
-7 = '-7 RF'  
-8 = '-8 DK'  
-1 = '-1 Inapplicable'  
-9 = '-9 Missing'  
1 = "1 Yes" ;
```

VALUE F200006W

## SAS ALGORITHM FOR DEMENTIA

```
-7 = '-7 RF'  
-8 = '-8 DK'  
-1 = '-1 Inapplicable'  
-9 = '-9 Missing'  
1 = "1 FREE STANDING NURSING HOME"  
2 = "2 FREE STANDING ASSISTED LIVING FACILITY"  
3 = "3 NURSING HOME AND ASSISTED LIVING FACILITY"  
4 = "4 CONTINUING CARE RETIREMENT COMMUNITY (CCRC)"  
5 = "5 ADULT FAMILY CARE HOME"  
6 = "6 GROUP HOME"  
7 = "7 BOARD AND CARE HOME"  
8 = "8 RETIREMENT COMMUNITY OR SENIOR HOUSING (NOT CCRC)"  
91 = "91 OTHER (SPECIFY)" ;
```

VALUE F200007W

```
-7 = '-7 RF'  
-8 = '-8 DK'  
-1 = '-1 Inapplicable'  
-9 = '-9 Missing'  
1 = "1 YES"  
2 = "2 NO" ;
```

VALUE F200008W

```
-7 = '-7 RF'  
-8 = '-8 DK'  
-1 = '-1 Inapplicable'  
-9 = '-9 Missing'  
1 = "1 INDEPENDENT LIVING"  
2 = "2 ASSISTED LIVING"  
3 = "3 SPECIAL CARE, MEMORY CARE, OR ALZHEIMER'S UNIT"  
4 = "4 NURSING HOME"  
91 = "91 OTHER (SPECIFY)" ;
```

VALUE F200009W

```
-7 = '-7 RF'  
-8 = '-8 DK'  
-1 = '-1 Inapplicable'  
-9 = '-9 Missing'  
1 = "1 ASSISTED LIVING"  
2 = "2 NURSING HOME" ;
```

VALUE F200011W

```
-7 = '-7 RF'  
-8 = '-8 DK'  
-1 = '-1 Inapplicable'  
-9 = '-9 Missing'  
1 = "1 YES, SERVICE PROVIDED AS PART OF PACKAGE"  
2 = "2 YES, SERVICE PROVIDED AT AN EXTRA CHARGE"  
3 = "3 NO, SERVICE NOT PROVIDED" ;
```

VALUE F200012W

```
-7 = '-7 RF'  
-8 = '-8 DK'  
-1 = '-1 Inapplicable'  
-9 = '-9 Missing'  
1 = "1 SP/FAMILY"  
2 = "2 SOCIAL SECURITY/SSI"
```

## SAS ALGORITHM FOR DEMENTIA

```
3 = "3 MEDICAID"
4 = "4 MEDICARE"
5 = "5 OTHER SOURCE" ;

VALUE I200002W
-7 = '-7 RF'
-8 = '-8 DK'
-1 = '-1 Inapplicable'
-9 = '-9 Missing'
1 = "1 Yes"
2 = "2 No" ;

VALUE I200003W
-7 = '-7 RF'
-8 = '-8 DK'
-1 = '-1 Inapplicable'
-9 = '-9 Missing'
1 = "1 English"
2 = "2 Spanish"
3 = "3 Other (specify)" ;

VALUE I200005W
-7 = '-7 RF'
-8 = '-8 DK'
-1 = '-1 Inapplicable'
-9 = '-9 Missing'
1 = "1 Friendly and interested"
2 = "2 Cooperative but not particularly interested"
3 = "3 Impatient and restless"
4 = "4 Hostile" ;

VALUE I200006W
-7 = '-7 RF'
-8 = '-8 DK'
-1 = '-1 Inapplicable'
-9 = '-9 Missing'
1 = "1 Good"
2 = "2 Fair"
3 = "3 Poor" ;

VALUE I200008W
-7 = '-7 RF'
-8 = '-8 DK'
-1 = '-1 Inapplicable'
-9 = '-9 Missing'
1 = "1 All of the time"
2 = "2 Most of the time"
3 = "3 Some of the time"
4 = "4 Only for the cognition and/or performance parts"
5 = "5 None of the time" ;

VALUE I200010W
-7 = '-7 RF'
-8 = '-8 DK'
-1 = '-1 Inapplicable'
-9 = '-9 Missing'
1 = "1 Yes"
```

## SAS ALGORITHM FOR DEMENTIA

```
2 = "2 No"  
3 = "3 Interview was conducted by telephone" ;
```

```
VALUE I200012W  
-7 = '-7 RF'  
-8 = '-8 DK'  
-1 = '-1 Inapplicable'  
-9 = '-9 Missing'  
1 = "1 Yes"  
2 = "2 No"  
3 = "3 Not Administered" ;
```

```
VALUE I200013W  
-7 = '-7 RF'  
-8 = '-8 DK'  
-1 = '-1 Inapplicable'  
-9 = '-9 Missing'  
1 = "1 Yes"  
2 = "2 No" ;
```

```
VALUE I200016W  
-7 = '-7 RF'  
-8 = '-8 DK'  
-1 = '-1 Inapplicable'  
-9 = '-9 Missing'  
1 = "1 Yes"  
2 = "2 No"  
3 = "3 Entire interview conducted by telephone" ;
```

```
VALUE I200017W  
-7 = '-7 RF'  
-8 = '-8 DK'  
-1 = '-1 Inapplicable'  
-9 = '-9 Missing'  
1 = "1 Not at all cluttered"  
2 = "2 Somewhat cluttered"  
3 = "3 Very cluttered"  
4 = "4 Could not see other rooms" ;
```

```
VALUE I200018W  
-7 = '-7 RF'  
-8 = '-8 DK'  
-1 = '-1 Inapplicable'  
-9 = '-9 Missing'  
1 = "1 None"  
2 = "2 A little"  
3 = "3 Some"  
4 = "4 A lot"  
5 = "5 Could not observe" ;
```

```
VALUE I200019W  
-7 = '-7 RF'  
-8 = '-8 DK'  
-1 = '-1 Inapplicable'  
-9 = '-9 Missing'  
1 = "1 Yes"  
2 = "2 No"
```

## SAS ALGORITHM FOR DEMENTIA

```
7 = "7 Could not observe" ;

/* DERIVED VARIABLE FORMATS */
VALUE LVGARRG
  1 = '1 Alone'
  2 = '2 With spouse/partner only (spouse/partner in household)'
  3 = '3 With spouse/partner and with others'
  4 = '4 With others only'
  -1 = '-1 Inapplicable'
  -9 = '-9 Missing';

VALUE DOUTSFDF
  8 = '8 Not done in last month'
  1 = '1 Did not do by self in last month'
  2 = '2 Did by self in last month/No Difficulty'
  3 = '3 Did by self in last month/Difficulty'
  4 = '4 DKRF Did by self in last month/No Difficulty'
  5 = '5 DKRF Did by self in last month/Difficulty'
  6 = '6 Did by self in last month/DKRF Difficulty'
  7 = '7 DKRF Did by self in last month/DKRF Difficulty'
  -1 = '-1 Inapplicable'
  -9 = '-9 Missing';

VALUE DOUTDEVI
  8 = '8 Not done in last month'
  1 = '1 No use of devices to go outside in last month'
  2 = '2 Use of devices to go outside in last month'
  3 = '3 DKRF If used devices to go outside in last month'
  4 = '4 DKRF If used devices in last month'
  -1 = '-1 Inapplicable'
  -9 = '-9 Missing';

VALUE DOUTHELP
  8 = '8 Not done in last month'
  1 = '1 No help to go outside in last month'
  2 = '2 Had help to go outside in last month'
  3 = '3 DKRF If had help to go outside in last month'
  -1 = '-1 Inapplicable'
  -9 = '-9 Missing';

VALUE DINSDFSFD
  8 = '8 Not done in last month'
  1 = '1 Did not do by self in last month'
  2 = '2 Did by self in last month/No Difficulty'
  3 = '3 Did by self in last month/Difficulty'
  4 = '4 DKRF Did by self in last month/No Difficulty'
  5 = '5 DKRF Did by self in last month/Difficulty'
  6 = '6 Did by self in last month/DKRF Difficulty'
  7 = '7 DKRF Did by self in last month/DKRF Difficulty'
  -1 = '-1 Inapplicable'
  -9 = '-9 Missing';

VALUE DINSDDDEV
  8 = '8 Not done in last month'
  1 = '1 No use of devices inside in last month'
  2 = '2 Use of devices inside in last month'
  3 = '3 DKRF If used devices inside in last month'
```

## SAS ALGORITHM FOR DEMENTIA

```
4 = '4 DKRF On use of devices'  
-1 = '-1 Inapplicable'  
-9 = '-9 Missing';
```

### VALUE dindsdhlp

```
8 = '8 Not done in last month'  
1 = '1 No help to go around inside in last month'  
2 = '2 Had help to go around inside in last month'  
3 = '3 DKRF If had help to go around inside in last month'  
-1 = '-1 Inapplicable'  
-9 = '-9 Missing';
```

### VALUE dbedsdfd

```
1 = '1 Did not do by self in last month'  
2 = '2 Did by self in last month/No Difficulty'  
3 = '3 Did by self in last month/Difficulty'  
4 = '4 DKRF Did by self in last month/No Difficulty'  
5 = '5 DKRF Did by self in last month/Difficulty'  
6 = '6 Did by self in last month/DKRF Difficulty'  
7 = '7 DKRF Did by self in last month/DKRF Difficulty'  
-1 = '-1 Inapplicable'  
-9 = '-9 Missing';
```

### VALUE dbeddevi

```
1 = '1 No use of cane or walker to get out of bed in last month'  
2 = '2 Use of cane or walker to get out of bed in last month'  
3 = '3 DKRF If Used cane or walker to get out of bed in last month'  
4 = '4 DKRF If used cane or walker in last month'  
-1 = '-1 Inapplicable'  
-9 = '-9 Missing';
```

### VALUE dbedhelp

```
1 = '1 No help to get out of bed in last month'  
2 = '2 Had help to get out of bed in last month'  
3 = '3 DKRF If had help to get out of bed in last month'  
-1 = '-1 Inapplicable'  
-9 = '-9 Missing';
```

### VALUE dlaunbfd

```
1 = '1 Did not do by self in last month'  
2 = '2 Did by self in last month/No Difficulty'  
3 = '3 Did by self in last month/Difficulty'  
4 = '4 DKRF Did by self in last month/No Difficulty'  
5 = '5 DKRF Did by self in last month/Difficulty'  
6 = '6 Did by self in last month/DKRF Difficulty'  
7 = '7 DKRF Did by self in last month/DKRF Difficulty'  
8 = '8 Not done in last month'  
-1 = '-1 Inapplicable'  
-9 = '-9 Missing';
```

### VALUE dlaunrea

```
1= '1 Health/functioning reason only'  
2= '2 Other reason only'  
3= '3 Both health/functioning and other'
```

## SAS ALGORITHM FOR DEMENTIA

```
4= '4 Service/someone from the place SP lives'  
-7 = '-7 RF'  
-8 = '-8 DK'  
-1 = '-1 Inapplicable'  
-9 = '-9 Missing';
```

### VALUE dshopsfd

```
1 = '1 Did not do by self in last month'  
2 = '2 Did by self in last month/No Difficulty'  
3 = '3 Did by self in last month/Difficulty'  
4 = '4 DKRF Did by self in last month/No Difficulty'  
5 = '5 DKRF Did by self in last month/Difficulty'  
6 = '6 Did by self in last month/DKRF Difficulty'  
7 = '7 DKRF Did by self in last month/DKRF Difficulty'  
8 = '8 Not done in last month'  
-1 = '-1 Inapplicable'  
-9 = '-9 Missing';
```

### VALUE dshoprea

```
1= '1 Health/functioning reason only'  
2= '2 Other reason only'  
3= '3 Both health/functioning and other'  
4= '4 Service/someone from the place SP lives'  
-7 = '-7 RF'  
-8 = '-8 DK'  
-1 = '-1 Inapplicable'  
-9 = '-9 Missing';
```

### VALUE dmealsfd

```
1 = '1 Did not do by self in last month'  
2 = '2 Did by self in last month/No Difficulty'  
3 = '3 Did by self in last month/Difficulty'  
4 = '4 DKRF Did by self in last month/No Difficulty'  
5 = '5 DKRF Did by self in last month/Difficulty'  
6 = '6 Did by self in last month/DKRF Difficulty'  
7 = '7 DKRF Did by self in last month/DKRF Difficulty'  
8 = '8 Not done in last month'  
-1 = '-1 Inapplicable'  
-9 = '-9 Missing';
```

### VALUE dmealrea

```
1= '1 Health/functioning reason only'  
2= '2 Other reason only'  
3= '3 Both health/functioning and other'  
4= '4 Service/someone from the place SP lives'  
-7 = '-7 RF'  
-8 = '-8 DK'  
-1 = '-1 Inapplicable'  
-9 = '-9 Missing';
```

### VALUE dbanksfd

```
1 = '1 Did not do by self in last month'  
2 = '2 Did by self in last month/No Difficulty'  
3 = '3 Did by self in last month/Difficulty'  
4 = '4 DKRF Did by self in last month/No Difficulty'  
5 = '5 DKRF Did by self in last month/Difficulty'  
6 = '6 Did by self in last month/DKRF Difficulty'
```



## SAS ALGORITHM FOR DEMENTIA

```
7 = '7 DKRF Did by self in last month/DKRF Difficulty'  
8 = '8 Not done in last month'  
-7 = '-7 RF'  
-8 = '-8 DK'  
-1 = '-1 Inapplicable'  
-9 = '-9 Missing';
```

### VALUE dbankrea

```
1= '1 Health/functioning reason only'  
2= '2 Other reason only'  
3= '3 Both health/functioning and other'  
4= '4 Service/someone from the place SP lives'  
-7 = '-7 RF'  
-8 = '-8 DK'  
-1 = '-1 Inapplicable'  
-9 = '-9 Missing';
```

### VALUE deatdevi

```
1 = '1 No use of adapted utensils in last month'  
2 = '2 Use of adapted utensils in last month'  
8 = '8 Not done in last month'  
3 = '3 DKRF If used adapted utensils in last month'  
-1 = '-1 Inapplicable'  
-9 = '-9 Missing';
```

### VALUE deathelp

```
1 = '1 No help eating in last month'  
2 = '2 Had help eating in last month'  
3 = '3 DKRF If had help eating in last month'  
8 = '8 Not done in last month'  
-1 = '-1 Inapplicable'  
-9 = '-9 Missing';
```

### VALUE deatsfdf

```
1 = '1 Did not do by self in last month'  
2 = '2 No Difficulty by self (and when using utensils)'  
3 = '3 Difficulty by self (and when using utensils)'  
6 = '6 Did by self in last month/DKRF Difficulty'  
7 = '7 DKRF Did by self in last month/DKRF Difficulty'  
8 = '8 Not done in last month'  
-1 = '-1 Inapplicable'  
-9 = '-9 Missing';
```

### VALUE dbathdev

```
1 = '1 No use of grab bars or bath seats in last month'  
2 = '2 Use of grab bars or bath seats in last month'  
3 = '3 DKRF If use of grab bars or bath seats in last month'  
4 = '4 DKRF If had grab bars or bath seats in last month'  
9 = '9 No bars/seats/shower/tub or washes up other way'  
-1 = '-1 Inapplicable'  
-9 = '-9 Missing';
```

### VALUE dbathhel

```
1 = '1 No help bathing in last month'  
2 = '2 Had help bathing in last month'  
3 = '3 DKRF If had help bathing in last month'  
-1 = '-1 Inapplicable'
```

## SAS ALGORITHM FOR DEMENTIA

```
-9 = '-9 Missing';
```

```
VALUE dbathsfd
```

```
1 = '1 Did not do by self in last month'  
2 = '2 No Difficulty by self (and when using grab bars or tub seat)'  
3 = '3 Difficulty by self (and when using grab bars or tub seat)'  
6 = '6 Did by self in last month/DKRF Difficulty'  
7 = '7 DKRF Did by self in last month/DKRF Difficulty'  
-1 = '-1 Inapplicable'  
-9 = '-9 Missing';
```

```
VALUE dtoildev
```

```
1 = '1 No use of toileting devices in last month'  
2 = '2 Use of toileting devices in last month'  
3 = '3 DKRF of some and no use of other toileting devices in last month'  
-1 = '-1 Inapplicable'  
-9 = '-9 Missing';
```

```
VALUE dtoilhel
```

```
1 = '1 No help toileting in last month'  
2 = '2 Had help toileting in last month'  
3 = '3 DKRF If had help toileting in last month'  
-1 = '-1 Inapplicable'  
-9 = '-9 Missing';
```

```
VALUE dtoolsfd
```

```
1 = '1 Did not do by self in last month'  
2 = '2 No Difficulty by self (and when using toileting devices)'  
3 = '3 Difficulty by self (and when using toileting devices)'  
6 = '6 Did by self in last month/DKRF Difficulty'  
7 = '7 DKRF Did by self in last month/DKRF Difficulty'  
-1 = '-1 Inapplicable'  
-9 = '-9 Missing';
```

```
VALUE ddresdev
```

```
8 = '8 Not done in last month'  
9 = '9 DKRF If dressed in last month'  
2 = '2 Use of dressing devices in last month'  
1 = '1 No use of dressing devices in last month'  
3 = '3 DKRF If use of dressing devices in last month'  
-1 = '-1 Inapplicable'  
-9 = '-9 Missing';
```

```
VALUE ddreshel
```

```
8 = '8 Not done in last month'  
9 = '9 DKRF If dressed in last month'  
1 = '1 No help dressing in last month'  
2 = '2 Had help dressing in last month'  
3 = '3 DKRF If had help dressing in last month'  
-1 = '-1 Inapplicable'  
-9 = '-9 Missing';
```

```
VALUE ddressfd
```

```
1 = '1 Did not do by self in last month'  
2 = '2 No Difficulty by self (and when using dressing devices)'  
3 = '3 Difficulty by self (and when using dressing devices)'  
6 = '6 Did by self in last month/DKRF Difficulty'
```

## SAS ALGORITHM FOR DEMENTIA

```
7 = '7 DKRF Did by self in last month/DKRF Difficulty'
8 = '8 Not done in last month'
-1 = '-1 Inapplicable'
-9 = '-9 Missing';

VALUE dmedssfd
1 = '1 Did not do by self in last month'
2 = '2 Did by self in last month/No Difficulty'
3 = '3 Did by self in last month/Difficulty'
4 = '4 DKRF Did by self in last month/No Difficulty'
5 = '5 DKRF Did by self in last month/Difficulty'
6 = '6 Did by self in last month/DKRF Difficulty'
7 = '7 DKRF Did by self in last month/DKRF Difficulty'
8 = '8 Not done in last month'
9 = '9 No or DKRF if medications taken in last month'
-1 = '-1 Inapplicable'
-9 = '-9 Missing';

VALUE dmedsrea
1 = '1 Health/functioning reason only'
2 = '2 Other reason only'
3 = '3 Both health/functioning and other'
4 = '4 Service/someone from the place SP lives'
-7 = '-7 RF'
-8 = '-8 DK'
-1 = '-1 Inapplicable'
-9 = '-9 Missing';

VALUE dmarstat
1 = '1 Married'
2 = '2 Living with a partner'
3 = '3 Separated'
4 = '4 Divorced'
5 = '5 Widowed'
6 = '6 Never married'
-7 = '-7 RF'
-8 = '-8 DK'
-1 = '-1 Inapplicable'
-9 = '-9 Missing';

VALUE DSPSAGEC
-7 = '-7 RF'
-8 = '-8 DK'
-1 = '-1 Inapplicable'
-9 = '-9 Missing'
1 = " 1 UNDER 50"
2 = " 2 50-54"
3 = " 3 55-59"
4 = " 4 60-64"
5 = " 5 65-69"
6 = " 6 70-74"
7 = " 7 75-79"
8 = " 8 80-84"
9 = " 9 85-89"
10 = "10 90 +" ;

VALUE dresid
-1 = '-1 Inapplicable'
1 = '1 Community '
```

## SAS ALGORITHM FOR DEMENTIA

```
2 = '2 Residential Care Resident not nursing home (SP interview
complete) '
3 = '3 Residential Care Resident not nursing home (FQ only) '
4 = '4 Nursing Home Resident';
VALUE f_dresid
  -1 = '-1 Inapplicable'
  1 = '1 Community '
  2 = '2 Residential care not nursing home (SP interview) '
  3 = '3 Residential care not nursing home (FQ only) '
  4 = '4 Nursing home (SP interview) '
  5 = '5 Nursing home (FQ only) '
  6 = '6 Deceased'
  7 = '7 Residential care not nursing home in R1 and R5 (FQ only) '
  8 = '8 Nursing home in R1 and R5 (FQ only) ' ;
VALUE f2dresid
  -1='-1 Inapplicable'
  1 = '1 Community '
  2 = '2 Residential care not nursing home (SP interview) '
  3 = '3 Residential care not nursing home (FQ only) '
  4 = '4 Nursing home (SP interview) '
  5 = '5 Nursing home (FQ only) '
  6 = '6 Deceased'
  7 = '7 Residential care not nursing home in R1 and R2 (FQ only) '
  8 = '8 Nursing home in R1 and R2 (FQ only) ' ;
VALUE f3dresid
  -1='-1 Inapplicable'
  1 = '1 Community '
  2 = '2 Residential care not nursing home (SP interview) '
  3 = '3 Residential care not nursing home (FQ only) '
  4 = '4 Nursing home (SP interview) '
  5 = '5 Nursing home (FQ only) '
  6 = '6 Deceased'
  7 = '7 Residential care not nursing home in R1 and R3 (FQ only) '
  8 = '8 Nursing home in R1 and R3 (FQ only) ' ;
VALUE f4dresid
  -1='-1 Inapplicable'
  1 = '1 Community '
  2 = '2 Residential care not nursing home (SP interview) '
  3 = '3 Residential care not nursing home (FQ only) '
  4 = '4 Nursing home (SP interview) '
  5 = '5 Nursing home (FQ only) '
  6 = '6 Deceased'
  7 = '7 Residential care not nursing home in R1 and R4 (FQ only) '
  8 = '8 Nursing home in R1 and R4 (FQ only) ' ;

VALUE QUARTILE
-9="-9 Missing"
-1="-1 Inapplicable";

VALUE SPPB
-9="-9 Missing"
-1="-1 Inapplicable";

VALUE DCLCKSC
  0 = "0 Not recognizable as a clock"
  1 = "1 Severely distorted depiction of a clock"
```

## SAS ALGORITHM FOR DEMENTIA

```
2 = "2 Moderately distorted depiction of a clock"  
3 = "3 Mildly distorted depiction of a clock"  
4 = "4 Reasonably accurate depiction of a clock"  
5 = "5 Accurate depiction of a clock (circular or square)"  
-7 = "-7 SP refused to draw clock"  
-8 = "-8 DK"  
-1 = "-1 Inapplicable"  
-2 = "-2 Proxy says cannot ask SP"  
-3 = "-3 Proxy says can ask SP but SP unable to answer"  
-4 = "-4 SP did not attempt to draw clock"  
-9 = "-9 Missing";
```

### VALUE DCLCKCL

```
1 = '1 Very clear'  
2 = '2 Somewhat clear'  
3 = '3 Somewhat unclear'  
4 = '4 Very unclear'  
5 = '5 Blank'  
-7 = '-7 SP refused to draw clock'  
-8 = '-8 DK'  
-1 = '-1 Inapplicable'  
-2 = '-2 Proxy says cannot ask SP'  
-3 = '-3 Proxy says can ask SP but SP unable to answer'  
-4 = '-4 SP did not attempt to draw clock'  
-9 = '-9 Missing';
```

### VALUE RESULT

```
-9='-9: MISSING'  
1='1: COMPLETED W RESULTS'  
2='2: COMPLETED MISSING RESULTS'  
3='3: ATTEMPTED W RESULTS'  
4='4: ATTEMPTED MISSING RESULTS'  
5='5: NOT ATTEMPTED SAFETY'  
6='6: NOT ATTEMPTED NOT SAFETY REASON'  
7='7: NO CHAIR/NO SPACE'  
9='9: NOT ATTEMPTED/MISSING';
```

### VALUE RESULT\_SCH

```
-9='-9: MISSING'  
1='1: COMPLETED W/OUT ARMS'  
2='2: COMPLETED W ARMS'  
3='3: ATTEMPTED W RESULTS'  
4='4: ATTEMPTED MISSING RESULTS'  
5='5: NOT ATTEMPTED SAFETY'  
6='6: NOT ATTEMPTED NOT SAFETY REASON'  
7='7: NO CHAIR/SAFETY REASON'  
8='8: NO CHAIR/NOT SAFETY REAS'  
9='9: NOT ATTEMPTED/MISSING'  
10='10: CH4=1 SINGLE CHAIR NOT COMPL';
```

### VALUE RESULT\_RCH

```
-9='-9: MISSING'  
1='1: COMPLETED W/OUT ARMS'  
2='2: COMPLETED MISSING RESULTS'  
3='3: ATTEMPTED W RESULTS'  
4='4: ATTEMPTED MISSING RESULTS'  
5='5: NOT ATTEMPTED SAFETY'
```

## SAS ALGORITHM FOR DEMENTIA

```
6='6: NOT ATTEMPTED NOT SAFETY REASON'  
9='9: NO CHAIR OR NOT ATTEMPTED/MISSING';
```

```
VALUE ZEROSCORE
```

```
1="1: NOT ELIGIBLE DUE TO EXCLUSION CRITERIA"  
2="2: NOT ATTEMPTED FOR SAFETY REASON"  
3="3: ATTEMPTED CHAIR STANDS/NOT ATTEMPTED FOR SAFETY"  
4="4: ATTEMPTED"  
5="5: NEW WALKING EXCLUSION"  
9="9: NOT ASSIGNED A ZERO SCORE";
```

```
VALUE D_LMLLOC
```

```
1 = '1 Community'  
2 = '2 Residential Care'  
-1 = '-1 Inapplicable'  
-9 = '-9 Missing';
```

```
VALUE D_LOCS
```

```
-7 = '-7 RF'  
-8 = '-8 DK'  
-1 = '-1 Inapplicable'  
-9 = '-9 Missing'  
1 = "1 Independent Living/Housing/Retirement"  
2 = "2 Assisted Living/Personal Care"  
3 = "3 Special Care, Memory or Alzheimer's Unit"  
4 = "4 Nursing Home"  
8 = "8 Not Reported" ;
```

```
VALUE PA25FMT
```

```
-1 = '-1 Inapplicable'  
-8 = '-8 DK'  
-9 = '-9 Missing'  
111= '111 Sleeping Napping'  
131= '131 Eating'  
132= '132 Going out to eat'  
199= '199 Other self care activities'  
211= '211 Work and work-related activities'  
221= '221 Other income generating activities'  
241= '241 Volunteering'  
299= '299 Other productive activities'  
321= '321 Shopping for non-durable goods'  
399= '399 Other shopping'  
411= '411 Food and drink preparation'  
434= '434 Outdoor Maintenance'  
439= '439 Household chores (cannot tell if indoor/outdoor)'  
441= '441 Animal and pet care'  
442= '442 Walking and exercising pets'  
449= '449 Other animal and pet care'  
451= '451 Vehicle maintenance and repair'  
471= '471 Financial management'  
499= '499 Other household activities'  
511= '511 Physical care and assistance to others'  
599= '599 Other physical care'  
611= '611 Socializing with others in person'  
612= '612 Socializing with others on the phone'  
616= '616 Socializing and communicating on the computer'  
621= '621 Watching TV and movies'
```

## SAS ALGORITHM FOR DEMENTIA

```
631= '631 Doing puzzles or games not on computer or online'
632= '632 Gambling not online or at a casino'
636= '636 Doing puzzles or games on a computer or online'
641= '641 Arts and crafts or hobbies'
642= '642 Reading'
643= '643 Writing'
644= '644 Listening to music'
646= '646 Computer or online leisure activities'
651= '651 Smoking or other tobacco use'
652= '652 Drinking alcohol'
661= '661 Doing nothing/relaxing'
669= '669 No activity'
699= '699 Other non active leisure'
711= '711 Playing sports'
712= '712 Walking or jogging'
713= '713 Other outdoor recreating activities'
714= '714 Attending sporting events'
715= '715 Other physical activity, exercise, yoga, swimming, working out,
dancing'
718= '718 Watching sporting events'
721= '721 Attending arts including plays and concerts'
723= '723 Attending movies'
724= '724 Attending casinos'
737= '737 Travel for leisure'
799= '799 Other active leisure'
811= '811 Attending religious activities'
812= '812 Other religious and spiritual activities'
821= '821 Attending meetings or events'
899= '899 Other organizational activity'
991= '991 Other miscellaneous'
992= '992 No favorite activity'
997= '997 Refused'
998= '998 Dont Know'
999= '999 Not Codeable';

      VALUE OCC_CODE
1    ='1 Management Occupations: 0010-0430'
2    ='2 Business and Financial Operations Occupations: 0500-0950'
3    ='3 Computer and mathematical occupations: 1000-1240'
4    ='4 Architecture and Engineering Occupations: 1300-1560'
5    ='5 Life, Physical, and Social Science Occupations: 1600-1965'
6    ='6 Community and Social Service Occupations: 2000-2060'
7    ='7 Legal Occupations: 2100-2160'
8    ='8 Education, Training, and Library Occupations: 2200-2550'
9    ='9 Arts, Design, Entertainment, Sports, and Media Occupations: 2600-
2960'
10   ='10 Healthcare Practitioners and Technical Occupations: 3000-3540'
11   ='11 Healthcare Support Occupations: 3600-3655'
12   ='12 Protective Service Occupations: 3700-3955'
13   ='13 Food Preparation and Serving Related Occupations: 4000-4160'
14   ='14 Building and Grounds Cleaning and Maintenance Occupations: 4200-
4250'
15   ='15 Personal Care and Service Occupations: 4300-4650'
16   ='16 Sales and Related Occupations: 4700-4965'
17   ='17 Office and Administrative Support Occupations: 5000-5940'
18   ='18 Farming, Fishing, and Forestry Occupations: 6000-6130'
19   ='19 Construction and Extraction Occupations: 6200-6940'
```

## SAS ALGORITHM FOR DEMENTIA

```
20 = '20 Installation, Maintenance, and Repair Occupations: 7000-7630'
21 = '21 Production Occupations: 7700-8965'
22 = '22 Transportation and Material Moving Occupations: 9000-9750'
23 = '23 Military Specific Occupations: 9800-9830'
24 = '24 No current occ (Unemployed, no work in the last 5 years, never
worked): 9920'
25 = '25 Blank field'
26 = '26 Code did not match'
94 = '94 Uncodable'
95 = '95 Never Worked Entire Life'
96 = '96 Homemaker/Raised Children'
-7 = '-7 RF'
-8 = '-8 DK'
-1 = '-1 Inapplicable'
-9 = '-9 Missing';

Value fl_Dfac
1 = '1 Should have routed as facility but did not'
2 = '2 Routed as facility but determined not facility resident'
-1 = '-1 Inapplicable';
VALUE PE_RSLT
-9='-9 Missing'
-1 = '-1 Inapplicable'
1='1 Completed'
2='2 Attempted'
3='3 Not attempted' ;
VALUE dosfacd /* FOR FQ2dosfacd */
-9= "-9 Missing"
-8 = "-8 DK"
-1 = "-1 INAPPLICABLE"
1 = " 1 FREE STANDING NURSING HOME"
2 = " 2 FREE STANDING ASSISTED LIVING FACILITY / RESIDENTIAL CARE
FACILITY"
3 = " 3 NURSING HOME AND ASSISTED LIVING FACILITY"
4 = " 4 CONTINUING CARE RETIREMENT COMMUNITY (CCRC)"
5 = " 5 ADULT FAMILY CARE HOME"
6 = " 6 GROUP HOME"
7 = " 7 BOARD AND CARE HOME / PERSONAL CARE HOME"
8 = " 8 RETIREMENT COMMUNITY OR SENIOR HOUSING (NOT CCRC)"
9 = " 9 INDEPENDENT LIVING"
10 = " 10 ASSISTED AND INDEPENDENT/RETIREMENT (NO NURSING HOME)"
11 = " 11 HOUSING (APT, CONDO, ETC.)";
;
VALUE dosfaca /* FOR FQ2dosfaca */
-9= "-9 Missing"
-8 = "-8 DK"
-1 = "-1 INAPPLICABLE"
1 = " 1 INDEPENDENT LIVING / HOUSING / RETIREMENT "
2 = " 2 ASSISTED LIVING / PERSONAL CARE"
3 = " 3 SPECIAL CARE, MEMORY CARE, OR ALZHEIMER'S UNIT"
4 = " 4 NURSING HOME" ;

VALUE INAP_YN
1 = ' 1 Yes'
2 = ' 2 No'
-1 = '-1 Inapplicable' ;
VALUE CENDIV /* RE1DCENSDIV - Updated for R2 - Re-Release */
```



## SAS ALGORITHM FOR DEMENTIA

```
1 = '1 Northeast Region: New England Division (ME, NH, VT, MA, RI, CT)'  
2 = '2 Northeast Region: Middle Atlantic Division (NY, NJ, PA)'  
3 = '3 Midwest Region: East North Central Division (OH, IN, IL, MI, WI)'  
4 = '4 Midwest Region: West North Central Division (MN, IA, MO, ND, SD,  
NE, KS)'  
5 = '5 South Region: South Atlantic Division (DE, MD, DC, VA, WV, NC,  
SC, GA, FL)'  
6 = '6 South Region: East South Central Division (KY, TN, AL, MS)'  
7 = '7 South Region: West South Central Division (AR, LA, OK, TX)'  
8 = '8 West Region: Mountain Division (MT, ID, WY, CO, NM, AZ, UT, NV)'  
9 = '9 West Region: Pacific Division (WA, OR, CA, AK, HI)'  
-9 = '-9 Missing';
```

```
VALUE W000002W  
-7 = '-7 RF'  
-8 = '-8 DK'  
-1 = '-1 Inapplicable'  
-9 = '-9 Missing'  
1 = "1 MALE"  
2 = "2 FEMALE" ;
```

```
VALUE W000005W  
1 = ' 1 Yes'  
2 = ' 2 No'  
-7 = '-7 RF'  
-8 = '-8 DK'  
-1 = '-1 Inapplicable'  
-9 = '-9 Missing';
```

```
VALUE R1DRESID  
-1 = '-1 Inapplicable'  
1 = '1 Community '  
2 = '2 Residential Care Resident not nursing home (SP interview  
complete)'  
3 = '3 Residential Care Resident not nursing home (FQ only)'  
4 = '4 Nursing Home Resident';
```

```
VALUE W200016W  
-7 = '-7 RF'  
-8 = '-8 DK'  
-1 = '-1 Inapplicable'  
-9 = '-9 Missing'  
1 = "1 MEDICAID"  
2 = "2 MEDICARE"  
3 = "3 STATE PROGRAM"  
91 = "91 OTHER (SPECIFY)" ;
```

```
VALUE W200012W  
-7 = '-7 RF'  
-8 = '-8 DK'  
-1 = '-1 Inapplicable'  
-9 = '-9 Missing'  
1 = "1 REGULAR"  
2 = "2 VARIED" ;
```

```
VALUE W200061W  
-7 = '-7 RF'
```

## SAS ALGORITHM FOR DEMENTIA

```
-8 = '-8 DK'  
-1 = '-1 Inapplicable'  
-9 = '-9 Missing'  
1 = "1 SEPARATION OR DIVORCE"  
2 = "2 DECEASED"  
3 = "3 MOVED ELSEWHERE"  
5 = "5 LAST INTERVIEW INFORMATION INCORRECT"  
8 = "8 OTHER REASON" ;
```

VALUE d2hrsmth

```
-13= '-13 Deceased '  
-12= '-12 Zero days/wk'  
-11= '-11 Hours missing'  
-10= '-10 Days missing'  
-9 = ' -9 Days and hrs missing'  
-1 = ' -1 Inapplicable'  
-7 = ' -7 RF'  
-8 = ' -8 DK'  
0-<1 = '<1'  
1-<10 = ' 1-<10 '  
10-<20 = '10-<20 '  
20-<30 = '20-<30 '  
30-<40 = '30-<40 '  
40-<60 = '40-<60 '  
60-<120 = '60-<120 '  
120-<180='120-<180 '  
180-744='180-744 (24/7) '  
9999='9999 Not codeable, <1 hour/day' ;
```

VALUE dhrsmth

```
-11= '-11:hours missing'  
-10= '-10:days missing'  
-9 = '-9:days and hrs missing'  
-1 = '-1 Inapplicable'  
-7 = '-7 RF'  
-8 = '-8 DK'  
0-<1 = '<1'  
1-<10 = ' 1-<10 '  
10-<20 = '10-<20 '  
20-<30 = '20-<30 '  
30-<40 = '30-<40 '  
40-<60 = '40-<60 '  
60-<120 = '60-<120 '  
120-<180='120-<180 '  
180-744='180-744 (24/7) '  
9999='9999 Not codeable, <1 hour/day' ;
```

Value dmissadd

```
-1='-1 Inapplicable'  
1='1 no flags and added at CL section'  
2='2 no flags and added at DT section'  
3='3 no flags and added at EW section'  
4='4 no flags and added at HA section'  
5='5 no flags and added at HO section'  
6='6 no flags and added at MC section'  
7='7 no flags and added at MO section'  
8='8 no flags and added at PA section'
```

## SAS ALGORITHM FOR DEMENTIA

```
9='9 no flags and added at PE section'  
10='10 no flags and added at SC section'  
11='11 no flags and added at SN section';
```

Value d2mssadd

```
-1='-1 Inapplicable'  
0='0 no flags and added at undetermined section'  
1='1 no flags and added at CL section'  
2='2 no flags and added at DT section'  
3='3 no flags and added at EW section'  
4='4 no flags and added at HA section'  
5='5 no flags and added at HO section'  
6='6 no flags and added at MC section'  
7='7 no flags and added at MO section'  
8='8 no flags and added at PA section'  
9='9 no flags and added at PE section'  
10='10 no flags and added at SC section'  
11='11 no flags and added at SN section'  
12='12 no flags and added at CS section'  
13='13 no flags and added at HH section'  
14='14 no flags and added at IS section';
```

Value dopage3c

```
-9='-9 Missing'  
-8='-8 RF'  
-7='-7 DK'  
-1='-1 Inapplicable'  
1='1 UNDER 30'  
2='2 30-39'  
3='3 40-49'  
4='4 50-59'  
5='5 60-69'  
6='6 70-79'  
7='7 80-89'  
8='8 90 +';
```

Value dopagect

```
-9='-9 Missing'  
-8='-8 DK'  
-7='-7 RF'  
-1='-1 Inapplicable'  
1='1 UNDER 20'  
2='2 20-24'  
3='3 25-29'  
4='4 30-34'  
5='5 35-39'  
6='6 40-44'  
7='7 45-49'  
8='8 50-54'  
9='9 55-59'  
10='10 60-64'  
11='11 65-69'  
12='12 70-74'  
13='13 75-79'  
14='14 80-84'  
15='15 85-89'  
16='16 90 +';
```

## SAS ALGORITHM FOR DEMENTIA

```
VALUE W200008W
-7 = '-7 RF'
-8 = '-8 DK'
-1 = '-1 Inapplicable'
-9 = '-9 Missing'
1 = "1 UNDER 20"
2 = "2 20-24"
3 = "3 25-29"
4 = "4 30-34"
5 = "5 35-39"
6 = "6 40-44"
7 = "7 45-49"
8 = "8 50-54"
9 = "9 55-59"
10 = "10 60-65"
11 = "11 66-69"
12 = "12 70-74"
13 = "13 75-79"
14 = "14 80-85"
15 = "15 86-89"
16 = "16 90-94"
17 = "17 95-99"
18 = "18 100 +"
;
VALUE NumCigs
-7 = '-7 RF'
-8 = '-8 DK'
-1 = '-1 Inapplicable'
-9 = '-9 Missing'
999 = '999 SP smokes less than 1 cigarette / day';

VALUE dlmlint
1 = '1 Last month of life interview'
-1 = '-1 Inapplicable' ;

VALUE d2intvra
1 = '1 65 to 69'
2 = '2 70 to 74'
3 = '3 75 to 79'
4 = '4 80 to 84'
5 = '5 85 to 89'
6 = '6 90+'
-7 = '-7 RF'
-8 = '-8 DK'
-1 = '-1 Inapplicable'
-9 = '-9 Missing' ;

VALUE dad8dem
1 = '1 DEMENTIA RESPONSE TO ANY AD8 ITEMS IN PRIOR ROUNDS'
-1 = '-1 Inapplicable' ;

VALUE dwrardinon
1 = '1 No words remembered'
-1 = '-1 Inapplicable'
```

## SAS ALGORITHM FOR DEMENTIA

```
-9 = '-9 Missing'      ;

VALUE dwrdirre
  1 = '1 Refused word recall task'
 -1 = '-1 Inapplicable'
 -9 = '-9 Missing'      ;

VALUE A0001AB
  1 = "1 AM"
  2 = "2 PM"
 -1 = '-1 Inapplicable'
 -9 = '-9 Missing';

VALUE A0002WA
  1 = "1 Yes, there is space to set up the walking course"
  2 = "2 No, there is not space to set up the walking course"
 -1 = '-1 Inapplicable'
 -9 = '-9 Missing';

VALUE A0004WA
  1 = "1 None"
  2 = "2 Cane"
  3 = "3 Walker or rollator"
  9 = "9 Other, specify"
 -1 = '-1 Inapplicable'
 -7 = '-7 RF'
 -8 = '-8 DK'
 -9 = '-9 Missing';

VALUE A0004CH
  1 = "1 No, chair stand not completed"
  2 = "2 Yes, chair stand completed"
 -1 = '-1 Inapplicable'
 -9 = '-9 Missing';

VALUE A0008CH
  1 = "1 With arms"
  2 = "2 Without arms"
 -1 = '-1 Inapplicable'
 -9 = '-9 Missing';

VALUE A0014CH
  1 = "1 1 Chair stand completed"
  2 = "2 2 Chair stands completed"
  3 = "3 3 Chair stands completed"
  4 = "4 4 Chair stands completed"
 -1 = '-1 Inapplicable'
 -9 = '-9 Missing';

VALUE BA1SS
  1 = '1 Eligible and recorded result for SxS Balance'
  2 = '2 Eligible and no recorded result for SxS Balance'
  4 = '4 Not Eligible due to exclusion criteria'
 -1 = '-1 Inapplicable'
 -9 = '-9 Missing';

VALUE BA1STAN
```

## SAS ALGORITHM FOR DEMENTIA

```
1 = '1 Eligible and recorded result for Semi Tandem Balance'  
2 = '2 Eligible and no recorded result for Semi Tandem Balance'  
3 = '3 Not administered because did not complete prior balance test'  
4 = '4 Not Eligible due to exclusion criteria'  
-1 = '-1 Inapplicable'  
-9 = '-9 Missing';
```

### VALUE BA1TAN

```
1 = '1 Eligible and recorded result for full tandem balance'  
2 = '2 Eligible and no recorded result for full tandem balance'  
3 = '3 Not administered because did not complete prior balance tests'  
4 = '4 Not Eligible due to exclusion criteria'  
-1 = '-1 Inapplicable'  
-9 = '-9 Missing';
```

### VALUE BA1OP

```
1 = '1 Eligible and recorded result for one leg eyes open balance'  
2 = '2 Eligible and no recorded result for one leg eyes open balance'  
3 = '3 Not administered because did not complete prior balance tests'  
4 = '4 Not Eligible due to exclusion criteria'  
-1 = '-1 Inapplicable'  
-9 = '-9 Missing';
```

### VALUE BA1CL

```
1 = '1 Eligible and recorded result for one leg eyes closed balance'  
2 = '2 Eligible and no recorded result for one leg eyes closed balance'  
3 = '3 Not administered because did not complete prior balance tests'  
4 = '4 Not Eligible due to exclusion criteria'  
-1 = '-1 Inapplicable'  
-9 = '-9 Missing';
```

### VALUE WA1WLK

```
1 = '1 Eligible and recorded result for walking course'  
2 = '2 Eligible and no recorded result for walking course'  
4 = '4 Not Eligible due to exclusion criteria'  
5 = '5 Not Eligible on exclusion criteria but recorded result (SP changed  
mind)'  
-1 = '-1 Inapplicable '  
-9 = '-9 Missing';
```

### VALUE CH1SCH

```
1 = '1 Eligible and recorded result for single chair stand'  
2 = '2 Eligible and no recorded result for single chair stand'  
4 = '4 Not Eligible due to exclusion criteria'  
-1 = '-1 Inapplicable'  
-9 = '-9 Missing';
```

### VALUE CH1RSH

```
1 = '1 Eligible and recorded result for repeated chair stand'  
2 = '2 Eligible and no recorded result for repeated chair stand'  
3 = '3 Not administered because did not complete single chair stand w/o  
arms'  
4 = '4 Not Eligible due to exclusion criteria'  
-1 = '-1 Inapplicable'  
-9 = '-9 Missing';
```

### VALUE GR1GRIP

## SAS ALGORITHM FOR DEMENTIA

```
1 = '1 Eligible and recorded result for grip strength'  
2 = '2 Eligible and no recorded result for grip strength'  
4 = '4 Not Eligible due to exclusion criteria'  
-1 = '-1 Inapplicable'  
-9 = '-9 Missing';
```

### VALUE WC1WAIST

```
1 = '1 Eligible and recorded result for waist circumference'  
2 = '2 Eligible and no recorded result for waist circumference'  
-1 = '-1 Inapplicable'  
-9 = '-9 Missing';
```

### VALUE PK1PEAK

```
1 = '1 Eligible and recorded result for peak air flow'  
2 = '2 Eligible and no recorded result for peak air flow'  
-1 = '-1 Inapplicable'  
-9 = '-9 Missing';
```

### VALUE RGT\_LFT

```
1 = '1 Right'  
2 = '2 Left'  
-1 = '-1 Inapplicable'  
-9 = '-9 Missing';
```

### VALUE PERSON

```
1 = '1 Interviewer'  
2 = '2 Sample person'  
-1 = '-1 Inapplicable'  
-9 = '-9 Missing';
```

### VALUE STAND

```
1 = '1 Standing'  
2 = '2 Sitting'  
3 = '3 Lying down'  
-1 = '-1 Inapplicable'  
-9 = '-9 Missing';
```

### VALUE EFFORT

```
1 = '1 Full effort'  
2 = '2 Less effort for health reason'  
3 = '3 Less effort for other reason'  
-1 = '-1 Inapplicable'  
-9 = '-9 Missing';
```

### VALUE WORDREC

```
1 = ' 1 LIST 1'  
2 = ' 2 LIST 2'  
3 = ' 3 LIST 3'  
-1 = '-1 Inapplicable '  
-9 = '-9 Missing';
```

### VALUE WORDRE\_N

```
-1 = '-1 Inapplicable'  
-2 = '-2 Proxy says cannot ask SP'  
-3 = '-3 Proxy says can ask SP but SP unable to answer'  
-7 = '-7 SP refused activity'  
-9 = '-9 Missing';
```

## SAS ALGORITHM FOR DEMENTIA

```
        VALUE SP30051W
-7 = '-7 RF'
-8 = '-8 DK'
-1 = '-1 Inapplicable'
-9 = '-9 Missing'
 1 = "1 EXCELLENT"
 2 = "2 VERY GOOD"
 3 = "3 GOOD"
 4 = "4 FAIR"
 5 = "5 POOR"
 6 = "6 DOES NOT APPLY/NO CARE IN LAST MONTH OF LIFE"
;
        VALUE SP3019aW
        -7 = '-7 RF'
-8 = '-8 DK'
-1 = '-1 Inapplicable'
-9 = '-9 Missing'
 1 = "1 JANUARY"
 2 = "2 FEBRUARY"
 3 = "3 MARCH"
 4 = "4 APRIL"
 5 = "5 MAY"
 6 = "6 JUNE"
 7 = "7 JULY"
 8 = "8 AUGUST"
 9 = "9 SEPTEMBER"
10 = "10 OCTOBER"
11 = "11 NOVEMBER"
12 = "12 DECEMBER"
90 = "90 LAST INTERVIEW INFORMATION INCORRECT"
;
        VALUE RACEHISP
          1 = ' 1 White, non-hispanic'
          2 = ' 2 Black, non-hispanic'
          3 = ' 3 Other (Am Indian/Asian/Native Hawaiian/Pacific Islander/other
specify), non-Hispanic'
          4 = ' 4 Hispanic'
          5 = ' 5 More than one DKRF primary'
          6 = ' 6 DKRF'
          -9 = '-9 Missing';

        VALUE SPPB_MIS
        -7 = '-7 RF'
-8 = '-8 DK'
-9 = '-9 Missing'
-1="-1 Inapplicable"
 1="1 Proxy interview"
 2="2 Missing walk and repeat chair and balance"
 3="3 Missing walk and repeat chair"
 4="4 Missing walk and balance"
 5="5 Missing repeat chair and balance"
 6="6 Missing walk"
 7="7 Missing repeat chair"
 8="8 Missing balance"
 9="9 No space"
10="10 No chair"
11="11 No space walk and no chair"
```



## SAS ALGORITHM FOR DEMENTIA

```
12="12 No space walk and non-safety missing"
13="13 No chair and non-safety missing"
14="14 Non-safety walk"
15="15 Non-safety chair"
16="16 Non-safety balance"
17="17 Non-safety walk and chair"
18="18 Non-safety walk and balance"
19="19 Non-safety chair and balance"
20="20 Non-safety walk and chair and balance";

VALUE QUARTILES
-9="-9 Missing"
-1="-1 Inapplicable"
;
VALUE SP30025W
  -7 = '-7 RF'
  -8 = '-8 DK'
  -1 = '-1 Inapplicable'
  -9 = '-9 Missing'
  1 = "1 FREE-STANDING (DETACHED) SINGLE HOUSE"
  2 = "2 SINGLE HOUSE BUT ATTACHED TO OTHERS (ROW HOUSE, TOWNHOUSE, DUPLEX,
TRIPLEX, OR TRIPLE DECKER)"
  3 = "3 MOBILE HOME OR TRAILER"
  4 = "4 MULTI-UNIT (2+) BUILDING"
  91 = "91 OTHER (SPECIFY)"
;
VALUE SP30046W
  -7 = '-7 RF'
  -8 = '-8 DK'
  -1 = '-1 Inapplicable'
  -9 = '-9 Missing'
  1 = "1 AT SP'S HOME"
  2 = "2 IN A HOSPITAL"
  3 = "3 IN A NURSING HOME"
  4 = "4 IN A HOSPICE RESIDENCE"
  5 = "5 AT SOMEONE ELSE'S HOME"
  91 = "91 SOMEWHERE ELSE (SPECIFY)"
;
VALUE SP30076W
  -7 = '-7 RF'
  -8 = '-8 DK'
  -1 = '-1 Inapplicable'
  -9 = '-9 Missing'
  1 = "1 YES"
  2 = "2 NO"
  7 = "7 YES, DOESNT KNOW HOW TO USE"
;
VALUE W300151W
  -7 = '-7 RF'
  -8 = '-8 DK'
  -1 = '-1 Inapplicable'
  -9 = '-9 Missing'
  1 = "1 VERY GOOD"
  2 = "2 GOOD"
  3 = "3 FAIR"
  4 = "4 POOR"
  5 = "5 VERY POOR" ;
```

## SAS ALGORITHM FOR DEMENTIA

```

VALUE SP30076H
  -7 = '-7 RF'
  -8 = '-8 DK'
  -1 = '-1 Inapplicable'
  -9 = '-9 Missing'
95 = "95 NO USUAL NUMBER OF HOURS OR DIFFERENT FROM DAY TO DAY" ;
VALUE SP30076G
  -7 = '-7 RF'
  -8 = '-8 DK'
  -1 = '-1 Inapplicable'
  -9 = '-9 Missing'
95 = "95 NO USUAL TIME OR DIFFERENT FROM DAY TO DAY" ;
VALUE SP30076I
  -7 = '-7 RF'
  -8 = '-8 DK'
  -1 = '-1 Inapplicable'
  -9 = '-9 Missing'
95 = "95 NO USUAL NUMBER OF HOURS OR DIFFERENT FROM NIGHT TO NIGHT"
;
VALUE SP30076J
  -7 = '-7 RF'
  -8 = '-8 DK'
  -1 = '-1 Inapplicable'
  -9 = '-9 Missing'
95 = "95 NO USUAL TIME OR DIFFERENT FROM NIGHT TO NIGHT" ;
VALUE SP30076K
  -7 = '-7 RF'
  -8 = '-8 DK'
  -1 = '-1 Inapplicable'
  -9 = '-9 Missing'
  0 = "0 LESS THAN AN HOUR"
90 = "90 FELL ASLEEP RIGHT AWAY"
95 = "95 NO USUAL AMOUNT OF TIME TO FALL ASLEEP OR DIFFERENT FROM
NIGHT TO NIGHT" ;
VALUE SP30155W
  -7 = '-7 RF'
  -8 = '-8 DK'
  -1 = '-1 Inapplicable'
  -9 = '-9 Missing'
  1 = "1 NAPS PLANNED"
  2 = "2 FELL ASLEEP WITHOUT MEANING TO"
  3 = "3 BOTH (SOME PLANNED/SOME NOT)" ;
VALUE SP30120W
  -7 = '-7 RF'
  -8 = '-8 DK'
  -1 = '-1 Inapplicable'
  -9 = '-9 Missing'
  1 = "1 OFTEN"
  2 = "2 SOMETIMES"
  3 = "3 RARELY"
  4 = "4 NEVER" ;
Value HOURSF
-13='-13 SP deceased/section not administered'
-12='-12 Valid skip/staff'
-11='-11 Hours missing'
-10='-10 Days missing'

```

## SAS ALGORITHM FOR DEMENTIA

```
-9='-9 Days and hrs missing'
-1='-1 Inapplicable'
0- 1='0-<1'
1.01- 10='1-<10'
10.01- 20='10-<20'
20.01- 30='20-<30'
30.01-40='30-<40'
40.01-60='40-<60'
60.01-120='60-<120'
120.01-180='120-<180'
180.01-744='180-744 (24/7)'
9999='9999 Not codeable, <1 hour/day';
VALUE SP30120W
-7 = '-7 RF'
-8 = '-8 DK'
-1 = '-1 Inapplicable'
-9 = '-9 Missing'
1 = "1 OFTEN"
2 = "2 SOMETIMES"
3 = "3 RARELY"
4 = "4 NEVER"
;
VALUE SP30118W
-7 = '-7 RF'
-8 = '-8 DK'
-1 = '-1 Inapplicable'
-9 = '-9 Missing'
1 = "1 A LOT"
2 = "2 SOME"
3 = "3 A LITTLE"
4 = "4 NOT AT ALL" ;
VALUE SP30141W
-7 = '-7 RF'
-8 = '-8 DK'
-1 = '-1 Inapplicable'
-9 = '-9 Missing'
1 = "less than $27,600,"
2 = "$27,600-$41,999,"
3 = "$42,000-$63,999,"
4 = "$64,000-$107,999, or"
5 = "$108,000 or more?" ;
VALUE SP30142W
-7 = '-7 RF'
-8 = '-8 DK'
-1 = '-1 Inapplicable'
-9 = '-9 Missing'
1 = "less than $14,000,"
2 = "$14,000-$21,999,"
3 = "$22,000-$35,999,"
4 = "$36,000-$48,999, or"
5 = "$49,000 or more?" ;
VALUE INVENT
-7 = '-7 RF'
-8 = '-8 DK'
-1 = '-1 Inapplicable'
-9 = '-9 Missing'
104="104-Arthritis"
```

## SAS ALGORITHM FOR DEMENTIA

107="107-Lung Disease"  
109="109-Dementia or Alzheimer's disease"  
110="110-Cancer"  
113="113-Other serious disease, illness, health problem"  
114="114-Knee surgery/problem"  
115="115-Hip repair or replacement/problem"  
117="117-Back or Spine Surgery/problem"  
121="121-Sleep Problems"  
201="201-Hearing problems"  
202="202-Sight problems"  
205="205-Pain"  
301="301-Breathing problems"  
302="302-Upper body strength movement"  
303="303-Lower body strength movement"  
304="304-Low energy"  
305="305-Balance or coordination problems"  
306="306-Walking distances"  
307="307-Climbing stairs"  
308="308-Lifting and carrying items"  
309="309-Kneeling"  
310="310-Bending"  
311="311-Reaching"  
312="312-Opening Jars"  
313="313-Grasping"  
401="401-Memory"  
501="501-Getting out of bed"  
502="502-Getting around inside"  
503="503-Getting outside"  
504="504-Travel/transportation"  
601="601-Eating"  
602="602-Washing"  
603="603-Toileting"  
604="604-Dressing"  
605="605-Grooming"  
701="701-Laundry"  
702="702-Shopping"  
703="703-Cooking"  
705="705-Money matters"  
706="706-Indoor cleaning and maintenance"  
707="707-Outdoor cleaning and maintenance"  
801="801-Medications"  
802="802-Doctor visits"  
804="804-Other medical self-care"  
1211="1211-Working"  
1442="1442-Walking/exercising pets"  
1451="1451-Vehicle repair and maintenance"  
1461="1461-Appliance tool, and toy use, set-up, repair, &  
maintenance"  
1462="1462-Computer use, set-up, repair, maintenance, and  
education"  
1473="1473-Household organization"  
1512="1512-Looking after someone else"  
1611="1611-Socializing and communicating with others-in person"  
1612="1612-Socializing and communication with others by talking  
on telephone"  
1613="1613-Attending or hosting party, wedding or social  
occasions"

## SAS ALGORITHM FOR DEMENTIA

```
1614="1614-Reading and sorting through the mail"
1621="1621-Watch television and movies"
1631="1631-Games & puzzles"
1641="1641-Arts and crafts, collecting, and hobbies, making
music"
1642="1642-Reading"
1643="1642-Writing (personal, not on computer)"
1644="1644-Listening to recorded music or radio"
1711="1711-Playing/practicing sports or taking physical activity
class/lessons"
1712="1712-Walking/jogging for exercise or pleasure or working
out"
1713="1713-Other outdoor recreation activities"
1813="1813-Religious & spiritual volunteer activities"
1901="1901-Other, no existing code"
1998="1998-Don't know"
1999="1999-Refused/blank";

VALUE W500058W
-7 = '-7 RF'
-8 = '-8 DK'
-1 = '-1 Inapplicable'
-9 = '-9 Missing'
1 = "1 MONTHS"
2 = "2 YEARS" ;

VALUE W500103W
-7 = '-7 RF'
-8 = '-8 DK'
-1 = '-1 Inapplicable'
-9 = '-9 Missing'
1 = "1 YES, A YEAR OR MORE"
2 = "2 NO, LESS THAN A YEAR" ;

VALUE W500105W
-7 = '-7 RF'
-8 = '-8 DK'
-1 = '-1 Inapplicable'
-9 = '-9 Missing'
1 = "1 MONTH AND YEAR"
2 = "2 NUMBER OF MONTHS AGO"
3 = "3 NUMBER OF YEARS AGO"
4 = "4 AGE WHEN LAST DROVE"
7 = "7 NEVER DROVE" ;

VALUE W500123W
-7 = '-7 RF'
-8 = '-8 DK'
-1 = '-1 Inapplicable'
-9 = '-9 Missing'
1 = "1 STILL FAVORITE ACTIVITY"
2 = "2 HAS A NEW FAVORITE ACTIVITY"
95 = "95 NO FAVORITE ACTIVITY" ;

VALUE W500124W
-7 = '-7 RF'
-8 = '-8 DK'
-1 = '-1 Inapplicable'
-9 = '-9 Missing'
1 = "1 LESS THAN 1 MONTH"
2 = "2 1 TO 3 MONTHS"
3 = "3 4 TO 5 MONTHS"
```

## SAS ALGORITHM FOR DEMENTIA

```
    4 = "4 6 OR MORE MONTHS" ;
VALUE W500125W
-7 = '-7 RF'
-8 = '-8 DK'
-1 = '-1 Inapplicable'
-9 = '-9 Missing'
  1 = "1 LESS THAN 1 WEEK"
  2 = "2 1 TO 2 WEEKS"
  3 = "3 3 TO 4 WEEKS" ;
VALUE W500126W
-7 = '-7 RF'
-8 = '-8 DK'
-1 = '-1 Inapplicable'
-9 = '-9 Missing'
  1 = "1 A FRACTURE, SPRAIN, OR INJURY"
  2 = "2 A HIP, KNEE, OR OTHER JOINT REPLACEMENT"
  3 = "3 ANOTHER MUSCULOSKELETAL CONDITION"
  4 = "4 A STROKE OR TIA"
  5 = "5 A HEART ATTACK"
  6 = "6 ANOTHER HEART CONDITION OR VASCULAR DISEASE"
  7 = "7 A BREATHING CONDITION"
  8 = "8 A NEUROLOGICAL CONDITION LIKE MS OR PARKINSONS"
  9 = "9 CANCER"
 94 = "94 ANOTHER CONDITION (SPECIFY)"
 95 = "95 NO MEDICAL CONDITION (IF VOLUNTEERED)" ;
VALUE W500128W
-7 = '-7 RF'
-8 = '-8 DK'
-1 = '-1 Inapplicable'
-9 = '-9 Missing'
  1 = "1 DIFFICULTY CHEWING OR SWALLOWING"
  2 = "2 DIFFICULTY SPEAKING OR BEING UNDERSTOOD"
  3 = "3 PAIN LEVEL"
  4 = "4 PROBLEM WITH BREATHING"
  5 = "5 PROBLEM WITH STRENGTH (MUSCLE WEAKNESS)"
  6 = "6 PROBLEM WITH MOVEMENT (RANGE OF MOTION)"
  7 = "7 LOW ENERGY LEVEL"
  8 = "8 PROBLEM WITH BALANCE OR COORDINATION"
  9 = "9 PROBLEM WITH FALLS"
 10 = "10 PROBLEM WITH MEMORY"
 95 = "95 NONE OF THESE PROBLEMS" ;
VALUE W500131W
-7 = '-7 RF'
-8 = '-8 DK'
-1 = '-1 Inapplicable'
-9 = '-9 Missing'
  1 = "1 AS AN OVERNIGHT PATIENT IN A HOSPITAL, NURSING HOME OR REHAD
FACILITY"
  2 = "2 AT AN OUTPATIENT CENTER, CLINIC, DRs OR THERAPISTs OFFICE"
  3 = "3 HOME"
  4 = "4 SOMEWHERE ELSE" ;
VALUE W500132W
-7 = '-7 RF'
-8 = '-8 DK'
-1 = '-1 Inapplicable'
-9 = '-9 Missing'
  1 = "1 IMPROVED"
```

## SAS ALGORITHM FOR DEMENTIA

```
    2 = "2 GOT WORSE"
    3 = "3 STAYED ABOUT THE SAME"
    4 = "4 VARIED/UP AND DOWN (IF VOLUNTEERED)" ;
VALUE W500133W
-7 = '-7 RF'
-8 = '-8 DK'
-1 = '-1 Inapplicable'
-9 = '-9 Missing'
 1 = "1 A LOT"
 2 = "2 SOMEWHAT"
 3 = "3 A LITTLE" ;

VALUE W500137W
-7 = '-7 RF'
-8 = '-8 DK'
-1 = '-1 Inapplicable'
-9 = '-9 Missing'
 1 = "1 WELL OFF"
 2 = "2 ABOVE AVERAGE"
 3 = "3 AVERAGE"
 4 = "4 BELOW AVERAGE"
 5 = "5 POOR" ;
VALUE W500010W
-7 = '-7 RF'
-8 = '-8 DK'
-1 = '-1 Inapplicable'
-9 = '-9 Missing'
 1 = "1 MOTHER ONLY"
 2 = "2 FATHER ONLY"
 3 = "3 ANOTHER RELATIVE"
 4 = "4 NON-RELATIVES"
 5 = "5 VARIED/MOVED AROUND" ;
VALUE W500142W
-7 = '-7 RF'
-8 = '-8 DK'
-1 = '-1 Inapplicable'
-9 = '-9 Missing'
 1 = "1 VERY WELL"
 2 = "2 WELL"
 3 = "3 NOT WELL"
 4 = "4 NOT AT ALL" ;
VALUE W500147W
-7 = '-7 RF'
-8 = '-8 DK'
-1 = '-1 Inapplicable'
-9 = '-9 Missing'
 1 = "1 NUMBER OF YEARS"
 2 = "2 AGE" ;
VALUE W500150W
-7 = '-7 RF'
-8 = '-8 DK'
-1 = '-1 Inapplicable'
-9 = '-9 Missing'
 1 = "1 ENTER PAYCHECK AMOUNT"
 2 = "2 ENTER PAY PER HOUR"
 3 = "3 ENTER PAY PER DAY" ;
VALUE W500151W
```

## SAS ALGORITHM FOR DEMENTIA

```
-7 = '-7 RF'
-8 = '-8 DK'
-1 = '-1 Inapplicable'
-9 = '-9 Missing'
  1 = "1 ENTER OCCUPATION"
  2 = "2 NEVER WORKED ENTIRE LIFE"
  3 = "3 HOMEMAKER/RAISED CHILDREN/WORKED IN THE HOME" ;
VALUE W500152W
-7 = '-7 RF'
-8 = '-8 DK'
-1 = '-1 Inapplicable'
-9 = '-9 Missing'
  1 = "1 SAME KIND OF WORK"
  2 = "2 SOMETHING DIFFERENT" ;
VALUE W500160W
-7 = '-7 RF'
-8 = '-8 DK'
-1 = '-1 Inapplicable'
-9 = '-9 Missing'
  1 = "1 MAIL"
  2 = "2 DIRECT DEPOSIT"
  3 = "3 PREPAID CARD" ;
VALUE W500165W
-7 = '-7 RF'
-8 = '-8 DK'
-1 = '-1 Inapplicable'
-9 = '-9 Missing'
  1 = "1 ENTER COMBINED AMOUNT"
  2 = "2 ENTER SP AND SPOUSE/PARTNER AMOUNTS SEPARATELY" ;
VALUE W500166W
-7 = '-7 RF'
-8 = '-8 DK'
-1 = '-1 Inapplicable'
-9 = '-9 Missing'
  1 = "1 LESS THAN $1,300"
  2 = "2 $1,300 TO LESS THAN $1,700"
  3 = "3 $1,700 TO LESS THAN $2,200"
  4 = "4 $2,200 TO LESS THAN $2,600"
  5 = "5 $2,600 OR MORE" ;
VALUE W500167W
-7 = '-7 RF'
-8 = '-8 DK'
-1 = '-1 Inapplicable'
-9 = '-9 Missing'
  1 = "1 LESS THAN $700"
  2 = "2 $700 TO LESS THAN $1,000"
  3 = "3 $1,000 TO LESS THAN $1,300"
  4 = "4 $1,300 TO LESS THAN $1,600"
  5 = "5 $1,600 OR MORE" ;
VALUE W500168W
-7 = '-7 RF'
-8 = '-8 DK'
-1 = '-1 Inapplicable'
-9 = '-9 Missing'
  1 = "1 LESS THAN $300"
  2 = "2 $300 TO LESS THAN $700"
  3 = "3 $700 TO LESS THAN $1,000"
```



## SAS ALGORITHM FOR DEMENTIA

```
    4 = "4 $1,000 OR MORE" ;
VALUE W500169W
-7 = '-7 RF'
-8 = '-8 DK'
-1 = '-1 Inapplicable'
-9 = '-9 Missing'
    1 = "1 LESS THAN $100"
    2 = "2 $100 TO LESS THAN $200"
    3 = "3 $200 TO LESS THAN $400"
    4 = "4 $400 TO LESS THAN $700"
    5 = "5 $700 OR MORE" ;
VALUE W500170W
-7 = '-7 RF'
-8 = '-8 DK'
-1 = '-1 Inapplicable'
-9 = '-9 Missing'
    1 = "1 LESS THAN $1,000"
    2 = "2 $1,000 TO LESS THAN $1,400"
    3 = "3 $1,400 TO LESS THAN $1,800"
    4 = "4 $1,800 TO LESS THAN $2,200"
    5 = "5 $2,200 OR MORE" ;
VALUE W500171W
-7 = '-7 RF'
-8 = '-8 DK'
-1 = '-1 Inapplicable'
-9 = '-9 Missing'
    1 = "1 LESS THAN $500"
    2 = "2 $500 TO LESS THAN $700"
    3 = "3 $700 TO LESS THAN $900"
    4 = "4 $900 TO LESS THAN $1,100"
    5 = "5 $1,100 OR MORE" ;
VALUE W500172W
-7 = '-7 RF'
-8 = '-8 DK'
-1 = '-1 Inapplicable'
-9 = '-9 Missing'
    1 = "1 LESS THAN $600"
    2 = "2 $600 TO LESS THAN $1,300"
    3 = "3 $1,300 TO LESS THAN $2,100"
    4 = "4 $2,100 TO LESS THAN $5,900"
    5 = "5 $5,900 OR MORE" ;
VALUE W500173W
-7 = '-7 RF'
-8 = '-8 DK'
-1 = '-1 Inapplicable'
-9 = '-9 Missing'
    1 = "1 LESS THAN $400"
    2 = "2 $400 TO LESS THAN $900"
    3 = "3 $900 TO LESS THAN $1,600"
    4 = "4 $1,600 TO LESS THAN $3,800"
    5 = "5 $3,800 OR MORE" ;
VALUE W500174W
-7 = '-7 RF'
-8 = '-8 DK'
-1 = '-1 Inapplicable'
-9 = '-9 Missing'
    1 = "1 LESS THAN $34,000"
```

## SAS ALGORITHM FOR DEMENTIA

```
2 = "2 $34,000 TO LESS THAN $82,000"  
3 = "3 $82,000 TO LESS THAN $175,000"  
4 = "4 $175,000 TO LESS THAN $413,000"  
5 = "5 $413,000 OR MORE" ;  
VALUE W500175W  
-7 = '-7 RF'  
-8 = '-8 DK'  
-1 = '-1 Inapplicable'  
-9 = '-9 Missing'  
1 = "1 LESS THAN $20,000"  
2 = "2 $20,000 TO LESS THAN $47,000"  
3 = "3 $47,000 TO LESS THAN $92,000"  
4 = "4 $92,000 TO LESS THAN $218,000"  
5 = "5 $218,000 OR MORE" ;  
VALUE W500176W  
-7 = '-7 RF'  
-8 = '-8 DK'  
-1 = '-1 Inapplicable'  
-9 = '-9 Missing'  
1 = "1 LESS THAN $200"  
2 = "2 $200 TO LESS THAN $500"  
3 = "3 $500 TO LESS THAN $1,000"  
4 = "4 $1,000 TO LESS THAN $2,500"  
5 = "5 $2,500 OR MORE" ;  
VALUE W500177W  
-7 = '-7 RF'  
-8 = '-8 DK'  
-1 = '-1 Inapplicable'  
-9 = '-9 Missing'  
1 = "1 LESS THAN $100"  
2 = "2 $100 TO LESS THAN $300"  
3 = "3 $300 TO LESS THAN $700"  
4 = "4 $700 TO LESS THAN $1,700"  
5 = "5 $1,700 OR MORE" ;  
VALUE W500178W  
-7 = '-7 RF'  
-8 = '-8 DK'  
-1 = '-1 Inapplicable'  
-9 = '-9 Missing'  
1 = "1 LESS THAN $2,400"  
2 = "2 $2,400 TO LESS THAN $6,000"  
3 = "3 $6,000 TO LESS THAN $12,000"  
4 = "4 $12,000 TO LESS THAN $30,000"  
5 = "5 $30,000 OR MORE" ;  
VALUE W500179W  
-7 = '-7 RF'  
-8 = '-8 DK'  
-1 = '-1 Inapplicable'  
-9 = '-9 Missing'  
1 = "1 LESS THAN $1,200"  
2 = "2 $1,200 TO LESS THAN $3,600"  
3 = "3 $3,600 TO LESS THAN $8,400"  
4 = "4 $8,400 TO LESS THAN $20,400"  
5 = "5 $20,400 OR MORE" ;  
VALUE W500180W  
-7 = '-7 RF'  
-8 = '-8 DK'
```

## SAS ALGORITHM FOR DEMENTIA

```
-1 = '-1 Inapplicable'
-9 = '-9 Missing'
 1 = "1 LESS THAN $9,000"
 2 = "2 $9,000 TO LESS THAN $18,000"
 3 = "3 $18,000 TO LESS THAN $93,000"
 4 = "4 $93,000 TO LESS THAN $350,000"
 5 = "5 $350,000 OR MORE" ;

VALUE W500181W
-7 = '-7 RF'
-8 = '-8 DK'
-1 = '-1 Inapplicable'
-9 = '-9 Missing'
 1 = "1 LESS THAN $600"
 2 = "2 $600 TO LESS THAN $5,000"
 3 = "3 $5,000 TO LESS THAN $16,000"
 4 = "4 $16,000 TO LESS THAN $62,000"
 5 = "5 $62,000 OR MORE" ;

VALUE W500182W
-7 = '-7 RF'
-8 = '-8 DK'
-1 = '-1 Inapplicable'
-9 = '-9 Missing'
 1 = "1 LESS THAN $8,000"
 2 = "2 $8,000 TO LESS THAN $62,000"
 3 = "3 $62,000 TO LESS THAN $192,000"
 4 = "4 $192,000 TO LESS THAN $213,000"
 5 = "5 $213,000 OR MORE" ;

VALUE W500183W
-7 = '-7 RF'
-8 = '-8 DK'
-1 = '-1 Inapplicable'
-9 = '-9 Missing'
 1 = "1 LESS THAN $300"
 2 = "2 $300 TO LESS THAN $2,500"
 3 = "3 $2,500 TO LESS THAN $8,000"
 4 = "4 $8,000 TO LESS THAN $37,000"
 5 = "5 $37,000 OR MORE" ;

VALUE W500184W
-7 = '-7 RF'
-8 = '-8 DK'
-1 = '-1 Inapplicable'
-9 = '-9 Missing'
 1 = "1 LESS THAN $11,000"
 2 = "2 $11,000 TO LESS THAN $25,000"
 3 = "3 $25,000 TO LESS THAN $50,000"
 4 = "4 $50,000 TO LESS THAN $108,000"
 5 = "5 $108,000 OR MORE" ;

VALUE W500185W
-7 = '-7 RF'
-8 = '-8 DK'
-1 = '-1 Inapplicable'
-9 = '-9 Missing'
 1 = "1 LESS THAN $2,000"
 2 = "2 $2,000 TO LESS THAN $7,000"
 3 = "3 $7,000 TO LESS THAN $17,000"
 4 = "4 $17,000 TO LESS THAN $57,000"
 5 = "5 $57,000 OR MORE" ;
```

## SAS ALGORITHM FOR DEMENTIA

```
VALUE W500186W
-7 = '-7 RF'
-8 = '-8 DK'
-1 = '-1 Inapplicable'
-9 = '-9 Missing'
 1 = "1 LESS THAN $8,000"
 2 = "2 $8,000 TO LESS THAN $13,000"
 3 = "3 $13,000 TO LESS THAN $28,000"
 4 = "4 $28,000 TO LESS THAN $54,000"
 5 = "5 $54,000 OR MORE" ;

VALUE W500187W
-7 = '-7 RF'
-8 = '-8 DK'
-1 = '-1 Inapplicable'
-9 = '-9 Missing'
 1 = "1 LESS THAN $500"
 2 = "2 $500 TO LESS THAN $1,900"
 3 = "3 $1,900 TO LESS THAN $5,000"
 4 = "4 $5,000 TO LESS THAN $20,000"
 5 = "5 $20,000 OR MORE" ;

VALUE W500188W
-7 = '-7 RF'
-8 = '-8 DK'
-1 = '-1 Inapplicable'
-9 = '-9 Missing'
 1 = "1 LESS THAN $200"
 2 = "2 $200 TO LESS THAN $1,000"
 3 = "3 $1,000 TO LESS THAN $4,000"
 4 = "4 $4,000 TO LESS THAN $16,000"
 5 = "5 $16,000 OR MORE" ;

VALUE W500189W
-7 = '-7 RF'
-8 = '-8 DK'
-1 = '-1 Inapplicable'
-9 = '-9 Missing'
 1 = "1 LESS THAN $400"
 2 = "2 $400 TO LESS THAN $1,000"
 3 = "3 $1,000 TO LESS THAN $2,000"
 4 = "4 $2,000 TO LESS THAN $11,000"
 5 = "5 $11,000 OR MORE" ;

VALUE W500190W
-7 = '-7 RF'
-8 = '-8 DK'
-1 = '-1 Inapplicable'
-9 = '-9 Missing'
 1 = "1 LESS THAN $30,000"
 2 = "2 $30,000 TO LESS THAN $101,000"
 3 = "3 $101,000 TO LESS THAN $247,000"
 4 = "4 $247,000 TO LESS THAN $703,000"
 5 = "5 $703,000 OR MORE" ;

VALUE W500191W
-7 = '-7 RF'
-8 = '-8 DK'
-1 = '-1 Inapplicable'
-9 = '-9 Missing'
 1 = "1 LESS THAN $18,000"
 2 = "2 $18,000 TO LESS THAN $68,000"
```

## SAS ALGORITHM FOR DEMENTIA

```
3 = "3 $68,000 TO LESS THAN $122,000"  
4 = "4 $122,000 TO LESS THAN $293,000"  
5 = "5 $293,000 OR MORE" ;  
VALUE W500192W  
-7 = '-7 RF'  
-8 = '-8 DK'  
-1 = '-1 Inapplicable'  
-9 = '-9 Missing'  
1 = "1 LESS THAN $3,600"  
2 = "2 $3,600 TO LESS THAN $12,000"  
3 = "3 $12,000 TO LESS THAN $25,000"  
4 = "4 $25,000 TO LESS THAN $64,000"  
5 = "5 $64,000 OR MORE" ;  
VALUE W500193W  
-7 = '-7 RF'  
-8 = '-8 DK'  
-1 = '-1 Inapplicable'  
-9 = '-9 Missing'  
1 = "1 LESS THAN $3,600"  
2 = "2 $3,600 TO LESS THAN $7,200"  
3 = "3 $7,200 TO LESS THAN $14,000"  
4 = "4 $14,000 TO LESS THAN $38,000"  
5 = "5 $38,000 OR MORE" ;  
VALUE W500194W  
-7 = '-7 RF'  
-8 = '-8 DK'  
-1 = '-1 Inapplicable'  
-9 = '-9 Missing'  
1 = "1 LESS THAN $30,000"  
2 = "2 $30,000 TO LESS THAN $43,000"  
3 = "3 $43,000 TO LESS THAN $66,000"  
4 = "4 $66,000 TO LESS THAN $109,000"  
5 = "5 $109,000 OR MORE" ;  
VALUE W500195W  
-7 = '-7 RF'  
-8 = '-8 DK'  
-1 = '-1 Inapplicable'  
-9 = '-9 Missing'  
1 = "1 LESS THAN $18,000"  
2 = "2 $18,000 TO LESS THAN $22,000"  
3 = "3 $22,000 TO LESS THAN $36,000"  
4 = "4 $36,000 TO LESS THAN $56,000"  
5 = "5 $56,000 OR MORE" ;  
VALUE W500209W  
-7 = '-7 RF'  
-8 = '-8 DK'  
-1 = '-1 Inapplicable'  
-9 = '-9 Missing'  
1 = "1 YES"  
2 = "2 NO"  
3 = "3 CANT DO - DONT DO" ;  
VALUE W500196W  
-7 = '-7 RF'  
-8 = '-8 DK'  
-1 = '-1 Inapplicable'  
-9 = '-9 Missing'  
1 = "1 LESS THAN $2,500"
```

## SAS ALGORITHM FOR DEMENTIA

```
2 = "2 $2,500 TO LESS THAN $5,000"
3 = "3 $5,000 TO LESS THAN $10,000"
4 = "4 $10,000 TO LESS THAN $20,000"
5 = "5 $20,000 TO LESS THAN $50,000"
6 = "6 $50,000 OR MORE" ;
VALUE dage2us
  0 = "0 Less than age 1"
  997 = "997 Born in US"
  -9 = "-9 Missing"
  -8 = "-8 DK"
  -7 = "-7 RF"
  -1 = "-1 Inapplicable";
VALUE locsp
  -9 = "-9 Missing"
  -8 = "-8 DK"
  -7 = "-7 RF"
  -1 = "-1 Inapplicable"
  1 = "1 Independent Living"
  2 = "2 Assisted Living"
  3 = "3 Special Care Unit"
  4 = "4 Nursing Home"
  8 = "8 Not Reported" ;

VALUE resid
  -9 = '-9 Missing'
  -8 = "-8 DK"
  -7 = "-7 RF"
  -1 = "-1 Inapplicable"
  1 = "Community"
  2 = "Residential care not nursing home (SP interview)"
  3 = "Residential care not nursing home (FQ only)"
  4 = "Nursing home (SP interview)"
  5 = "Nursing home (FQ only)"
  6 = "Deceased"
  7 = "Residential care not nursing home in R1 and R2 (FQ only)"
  8 = "Nursing home in R1 and R2 (FQ only)";

VALUE residlml
  1 = "1 Community"
  2 = "2 Residential care"
  -1 = "-1 Inapplicable"
  -9 = '-9 Missing';

VALUE SP50139W
  1 = "1 White/Caucasian"
  2 = "2 Black/African American"
  3 = "3 Other"
  -7 = '-7 RF'
  -8 = '-8 DK'
  -9 = '-9 Missing';

VALUE Locat15w
  1= "1 Lives in same City and State as at age 15"
  2= "2 Lives in same state but different City (or DKRF city) as age
15"
  3= "3 Does not live in same State as age 15"
  -1= "-1 Inapplicable"
```

## SAS ALGORITHM FOR DEMENTIA

```
-7 = '-7 RF'
-8 = '-8 DK'
-9 = '-9 Missing';
Value dresnew
  1 = "1 same residence as last int"
  2 = "2 new residence since last int"
-1= "-1 Inapplicable"
-7 = '-7 RF'
-8 = '-8 DK'
-9 = '-9 Missing';

Value dcontnew
  1 = "1 Continuing sample from R1"
  2 = "2 New sample in R5"
-1= "-1 Inapplicable"
-7 = '-7 RF'
-8 = '-8 DK'
-9 = '-9 Missing';

VALUE DMDDEVYR
  1 = ' 1 No Mobility device use in last year/since last interview'
  2 = ' 2 Mobility device use in last year/since last interview'
-1 = '-1 Inapplicable '
-7 = '-7 RF'
-8 = '-8 DK'
-9 = '-9 Missing';

VALUE DMDEVST
  0 = '0 less than 1 month of mobility device use'
  1 = '1 month of mobility device use'
  2 = '2 months of mobility device use'
  3 = '3 months of mobility device use'
  4 = '4 months of mobility device use'
  5 = '5 months of mobility device use'
  6 = '6 months of mobility device use'
  7 = '7 months of mobility device use'
  8 = '8 months of mobility device use'
  9 = '9 months of mobility device use'
 10 = '10 months of mobility device use'
 11 = '11 months of mobility device use'
-7 = '-7 used last month but RF number of months of use in year'
-8 = '-8 used last month but DK number of months of use in year'
-1 = '-1 Inapplicable '
-2 = '-2 Not asked of continuing sample';

VALUE DMDEVEND
  0 = '0 Between 11 and 12 months since device use ended'
  1 = '1 month since mobility device use ended'
  2 = '2 months since mobility device use ended'
  3 = '3 months since mobility device use ended'
  4 = '4 months since mobility device use ended'
  5 = '5 months since mobility device use ended'
  6 = '6 months since mobility device use ended'
  7 = '7 months since mobility device use ended'
  8 = '8 months since mobility device use ended'
  9 = '9 months since mobility device use ended'
 10 = '10 months since mobility device use ended'
```

## SAS ALGORITHM FOR DEMENTIA

```
11 = '11 months since mobility device use ended'  
-7 = '-7 no use last month and RF number of months since device use  
ended'  
-8 = '-8 no use last month and DK number of months since device use  
ended'  
-1 = '-1 Inapplicable '  
-2 = '-2 Not asked of continuing sample' ;  
VALUE DMDHLPYR  
1 = " 1 No mobility help in last year/since last interview"  
2 = " 2 Mobility help in last year/since last interview"  
-7 = " -7 RF"  
-8 = " -8 DK"  
-1 = " -1 Inapplicable "  
-2 = '-2 Not asked of continuing sample' ;  
  
VALUE DMDHLPST  
0 = '0 less than 1 month of help'  
1 = '1 month of help'  
2 = '2 months of help'  
3 = '3 months of help'  
4 = '4 months of help'  
5 = '5 months of help'  
6 = '6 months of help'  
7 = '7 months of help'  
8 = '8 months of help'  
9 = '9 months of help'  
10 = '10 months of help'  
11 = '11 months of help'  
-7 = '-7 help last month but RF number of months of help in year'  
-8 = '-8 help last month but DK number of months of help in year'  
-1 = " -1 Inapplicable "  
-2 = " -2 Not asked of continuing sample " ;  
VALUE DMDHLPEN  
0 = '0 less than 1 month since help ended'  
1 = '1 month since help ended'  
2 = '2 months since help ended'  
3 = '3 months since help ended'  
4 = '4 months since help ended'  
5 = '5 months since help ended'  
6 = '6 months since help ended'  
7 = '7 months since help ended'  
8 = '8 months since help ended'  
9 = '9 months since help ended'  
10 = '10 months since help ended'  
11 = '11 months since help ended'  
-7 = '-7 no help last month and RF number of months since help ended'  
-8 = '-8 no help last month and DK number of months since help ended'  
-1 = '-1 Inapplicable '  
-2 = '-2 Not asked of continuing sample';  
VALUE DMHLPYRS  
0 = '0 none or less than 1 year'  
997 = '997 since birth'  
-7 = '-7 RF'  
-8 = '-8 DK'  
-1 = '-1 Inapplicable '  
-2 = '-2 Not asked of continuing sample'  
-9 = '-9 Missing';
```



## SAS ALGORITHM FOR DEMENTIA

```
VALUE DSDHLPYR
  1 = ' 1 No self care help in last year/since last interview'
  2 = ' 2 Self care help in last year/since last interview'
-1 = '-1 Inapplicable'
-7 = '-7 DK'
-8 = '-8 RF'
-9 = '-9 Missing';

VALUE DSHLPND
  0 = ' 0 Between 11 and 12 months since self care help ended'
  1 = ' 1 Month since self care help ended'
  2 = ' 2 Months since self care help ended'
  3 = ' 3 Months since self care help ended'
  4 = ' 4 Months since self care help ended'
  5 = ' 5 Months since self care help ended'
  6 = ' 6 Months since self care help ended'
  7 = ' 7 Months since self care help ended'
  8 = ' 8 Months since self care help ended'
  9 = ' 9 Months since self care help ended'
 10 = '10 Months since self care help ended'
 11 = '11 Months since self care help ended'
-7 = '-7 No help last month and RF number of months since help ended'
-8 = '-8 No help last month and DK number of months since help ended'
-1 = '-1 Inapplicable'
  -2 = '-2 Not asked of continuing sample'
-9 = '-9 Missing'      ;

VALUE DSHLPYRS
  0 = ' 0 None or less than 1 year of self care help'
-7 = '-7 RF'
-8 = '-8 DK'
-1 = '-1 Inapplicable'
  -2 = '-2 Not asked of continuing sample'
-9 = '-9 Missing'
 997 = '997 since birth';

VALUE SP5RH7W
-7 = '-7 RF'
-8 = '-8 DK'
-1 = '-1 Inapplicable'
-9 = '-9 Missing'
  1 = "1 As an overnight patient in a hospital, nursing home, or
rehab facility"
  2 = "2 At an outpatient center, clinic, or doctors office or
therapists office"
  3 = "3 At home"
  4 = "4 Somewhere else"  ;

VALUE SP5LF5W
-7 = '-7 RF'
-8 = '-8 DK'
-1 = '-1 Inapplicable'
-9 = '-9 Missing'
997 = "997 Number of hours vary each week"  ;

VALUE DMH_GRP
  1 = "1 Help started"
  2 = "2 Help ended"
  3 = "3 Help both interviews with gap"
  4 = "4 Help both interviews with no gap"
```

## SAS ALGORITHM FOR DEMENTIA

```

    5 = "5 Help between interviews only (month ended missing)"
    6 = "6 No help either interview or between"
    11 = "11 Help started (month started missing)"
    21 = "21 Help ended (month ended missing)"
    41 = "41 Help both interviews (DK whether gap)"
    61 = "61 No help either interview (DK whether help between)"
    -9 = "-9 Missing"
    -1 = "-1 Inapplicable"
        -3 = "-3 Not asked of new sample"
-999 = "-999 Not determined" ;

VALUE DMU_GRP
    1 = "1 Use started"
    2 = "2 Use ended"
    3 = "3 Use both interviews with gap"
    4 = "4 Use both interviews with no gap"
    5 = "5 Use between interviews only (month ended missing)"
    6 = "6 No use either interview or between"
    11 = "11 Use started (month started missing)"
    21 = "21 Use ended (month ended missing)"
    41 = "41 Use both interviews (DK whether gap)"
    61 = "61 No use either interview (DK whether use between)"
    -9 = "-9 Missing"
    -1 = "-1 Inapplicable"
        -3 = "-3 Not asked of new sample"
-999 = "-999 Not determined" ;

VALUE DMDS5FLG
    -1 = "-1 Inapplicable"
        -3 = "-3 Not asked of new sample"
    0 = "0 No current SP interview"
    1 = "1 No SP interview last round"
    2 = "2 Died and month death missing"
    3 = "3 Died <=1 month after last interview"
    4 = "4 Died 12-13 months after last interview"
    7 = "7 Skipped 1 or more help questions" ;

VALUE DS_GRP
    1 = "1 Help started"
    2 = "2 Help ended"
    3 = "3 Help both interviews with gap"
    4 = "4 Help both interviews with no gap"
    5 = "5 Help between interviews only"
    6 = "6 No help either interview or between"
    11 = "11 Help started (month started missing)"
    21 = "21 Help ended (month ended missing)"
    41 = "41 Help both interviews (DK whether gap)"
    61 = "61 No help either interview (DK whether help between)"
    -9 = "-9 Missing"
    -1 = "-1 Inapplicable"
        -3 = "-3 Not asked of new sample"
-999 = "-999 Not determined" ;

value groupmo 1 = "1 Started"
              2 = "2 Ended"
              3 = "3 Both times with gap"
              4 = "4 Both times no gap"
              5 = "5 Between only (end missing)"
              6 = "6 Neither time AND not between"

```

## SAS ALGORITHM FOR DEMENTIA

```

    11 = "11 Started (start missing)"
    21 = "21 Ended (end missing)"
    41 = "41 Both times (gap missing)"
    61 = "61 Neither time (between missing)"
        -1= "-1 Inapplicable"
        -3=" -3 Not asked of new sample"
        -7= "-7 RF"
        -8= "-8 DK"
        -9= "-9 Missing"
    -999 = "-999 Not determined"
    -99 = "-99 Partial" ;

VALUE nw_mths  0 = "0 Less than 1 month"
  1 ="1 month"
  2 ="2 months"
  3 ="3 months"
  4 ="4 months"
  5 ="5 months"
  6 ="6 months"
  7 ="7 months"
  8 ="8 months"
  9 ="9 months"
 10= "10 months"
 11= "11 months"
 12= "12 months"
 13= "13 months"
 14= "14 months"
 15= "15 months"
 16= "16 months"
 17= "17 months"
 18= "18 months"
 19= "19 months"
 20= "20 months"
 90= "90 Last round disputed"
 999= "999 No months"
 -1= "-1 Inapplicable"
   -3=" -3 Not asked of new sample"
 -7= "-7 RF"
 -8= "-8 DK"
 -9= "-9 Missing"
-10= "-10 Not ascertained"
-12= "-12 Outside of range (greater than months between
interviews)"
-13= "-13 None"
-999= "-999 Not determined"
-99= "-99 Partial";
    VALUE chntinh
  1 ="1 Yes, not in household"
 -1= "-1 Inapplicable"
 -7= "-7 RF"
 -8= "-8 DK"
 -9= "-9 Missing";
Value d4mssadd
  -1=' -1 Inapplicable'
  0='0 no flags and added at undetermined section'
  1='1 no flags and added at CL section'
  2='2 no flags and added at DT section'

```

## SAS ALGORITHM FOR DEMENTIA

```
3='3 no flags and added at EW section'  
4='4 no flags and added at HA section'  
5='5 no flags and added at HO section'  
6='6 no flags and added at MC section'  
7='7 no flags and added at MO section'  
8='8 no flags and added at PA section'  
9='9 no flags and added at PE section'  
10='10 no flags and added at SC section'  
11='11 no flags and added at SN section'  
12='12 no flags and added at CS section'  
13='13 no flags and added at HH section'  
14='14 no flags and added at IS section'  
15='15 no flags and added at HL section'  
16='16 no flags and added at SL section';  
VALUE HA5DWHL  
1 = "1 Meals on wheels last month"  
-1 = "-1 Inapplicable";  
VALUE HA5DTKO  
1 = "1 Restaurant or take out last month"  
-1 = "-1 Inapplicable";  
VALUE RE5BLDG  
-7 = '-7 RF'  
-8 = '-8 DK'  
-1 = '-1 Inapplicable'  
-9 = '-9 Missing'  
1 = "1 Building has one floor"  
2 = "2 Building has multiple floors" ;  
  
run;  
  
/*=====*/  
/* NHATS_Round_6_Combined_PROC_FORMAT_Statement.sas */  
  
PROC FORMAT ;  
  
VALUE release  
-1 = '-1 Inapplicable'  
1 = '1 Main Sample'  
2 = '2 Reserve Sample'  
9 = '9 New Release Sample';  
  
VALUE STAT_DTa  
4 = " 4 April"  
5 = " 5 May"  
6 = " 6 June"  
7 = " 7 July"  
8 = " 8 August"  
9 = " 9 September"  
10 = "10 October"  
11 = "11 November"  
99 = "99 Prior to start of field work"  
-1 = '-1 Inapplicable';  
  
VALUE $DISP  
'10' = "10 Not Available "  
'11' = "11 Ready"  
'12' = "12 Started "
```

## SAS ALGORITHM FOR DEMENTIA

```
'20' = "20 Final "  
'24' = "24 Not Required "  
'60' = "60 Complete "  
'61' = "61 Complete, NH facility"  
'62' = "62 Complete SP Deceased, Proxy Intv"  
'63' = "63 Complete SP, FQ not complete"  
'64' = "64 Complete FQ, SP not complete"  
'75' = "75 Physically/mentally unable to participate, no proxy"  
'76' = "76 Too ill to participate, no proxy"  
'77' = "77 Refusal, SP"  
'78' = "78 Language barrier"  
'79' = "79 Unable to locate"  
'80' = "80 Unavailable during field period"  
'82' = "82 Outside of PSU"  
'83' = "83 Ineligible"  
'85' = "85 Refusal, facility"  
'86' = "86 Deceased"  
'87' = "87 Refusal, proxy"  
'88' = "88 Work stopped" ;
```

VALUE DISP\_a

```
10 = "10 Not Available"  
11 = "11 Ready"  
12 = "12 Started"  
20 = "20 Final"  
24 = "24 Not Required"  
60 = "60 Complete"  
61 = "61 Complete, NH facility"  
62 = "62 Complete SP Deceased, Proxy Intv"  
63 = "63 Complete SP, FQ not complete"  
64 = "64 Complete FQ, SP not complete "  
75 = "75 Physically/mentally unable to participate, no proxy"  
76 = "76 Too ill to participate, no proxy"  
77 = "77 Refusal, SP"  
78 = "78 Language barrier"  
79 = "79 Unable to locate"  
80 = "80 Unavailable during field period"  
82 = "82 Outside of PSU"  
83 = "83 Ineligible"  
85 = "85 Refusal, facility"  
86 = "86 Deceased"  
87 = "87 Refusal, proxy"  
88 = "88 Work stopped" ;
```

VALUE DISP\_

```
10 = "10 Not Available"  
11 = "11 Ready"  
12 = "12 Started"  
20 = "20 Final"  
24 = "24 Not Required";
```

VALUE DISP\_F

```
-1 = '-1 Inapplicable'  
10 = "10 Not Available"  
11 = "11 Ready"  
12 = "12 Started"  
20 = "20 Final"
```

## SAS ALGORITHM FOR DEMENTIA

```
24 = "24 Not Required"  
60 = "60 Complete"  
61 = "61 Complete, NH facility"  
62 = "62 Complete SP Deceased, Proxy Intv"  
63 = "63 Complete SP, FQ not complete"  
64 = "64 Complete FQ, SP not complete "  
75 = "75 Physically/mentally unable to participate, no proxy"  
76 = "76 Too ill to participate, no proxy"  
77 = "77 Refusal, SP"  
78 = "78 Language barrier"  
79 = "79 Unable to locate"  
80 = "80 Unavailable during field period"  
81 = "81 Final deceased, new sample only"  
82 = "82 Outside of PSU"  
83 = "83 Ineligible"  
85 = "85 Refusal, facility"  
86 = "86 Deceased"  
87 = "87 Refusal, proxy"  
88 = "88 Work stopped"  
89 = "89 Final, Other Specify";
```

```
VALUE RFDK
```

```
-7 = '-7 RF'  
-8 = '-8 DK'  
-1 = '-1 Inapplicable'  
-9 = '-9 Missing';
```

```
VALUE $RFDK_F
```

```
'-7' = '-7 RF'  
'-8' = '-8 DK'  
'-1' = '-1 Inapplicable'  
'-9' = '-9 Missing';
```

```
VALUE RFDK_F
```

```
-7 = '-7 RF'  
-8 = '-8 DK'  
-1 = '-1 Inapplicable'  
-9 = '-9 Missing';
```

```
VALUE RFDK_B
```

```
-1 = '-1 Inapplicable'  
1 = '1 Yes-Breakoff';
```

```
VALUE $RFDK_C
```

```
'-1' = '-1 Inapplicable'  
'CL' = 'CL - Closing'  
'EW' = 'EW - Economic Well-Being'  
'FQ' = 'FQ - Facility Questionnaire'  
'HL' = 'HL - Helper'  
'HW' = 'HW - Height and Weight'  
'IP' = 'IP - Insurance Plans'  
'LF' = 'LF - Labor Force'  
'PA' = 'PA - Participation'  
'PE' = 'PE - Performance'  
'WB' = 'WB - Well-being' ;
```

```
VALUE $RFDK_2C
```

## SAS ALGORITHM FOR DEMENTIA

```
'-1' = '-1 Inapplicable'  
'-7' = '-7 RF'  
'-8' = '-8 DK'  
'-9' = '-9 Missing';
```

```
VALUE RFDK_Y  
 1 = ' 1 Yes'  
-7 = '-7 RF'  
-8 = '-8 DK'  
-1 = '-1 Inapplicable'  
-9 = '-9 Missing';
```

```
VALUE RFDK_I  
 0 = ' 0 No'  
 1 = ' 1 Yes'  
-7 = '-7 RF'  
-8 = '-8 DK'  
-1 = '-1 Inapplicable'  
-9 = '-9 Missing';
```

```
VALUE RFDK_YN  
 1 = ' 1 Yes'  
 2 = ' 2 No'  
-7 = '-7 RF'  
-8 = '-8 DK'  
-1 = '-1 Inapplicable'  
-9 = '-9 Missing';
```

```
VALUE DSTRP_G  
-7 = '-7 RF'  
-8 = '-8 DK'  
-1 = '-1 Inapplicable'  
-9 = '-9 Missing'  
 1 = '1 X condition and word color condition accuracy below threshold  
(less than .42)'  
 2 = '2 word condition only below threshold (less than .42)'  
 3 = '3 X condition and word color condition meet criteria for accuracy'  
 4 = '4 fewer than 50% of X and word color condition trials answered'  
999 = '999 X condition only below threshold (less than .42)';
```

```
VALUE DSTRP_R  
-7 = '-7 RF'  
-8 = '-8 DK'  
-1 = '-1 Inapplicable'  
-999 = '-999 Inapplicable'  
other = 'Values ranging between -.353 and 1.115';
```

```
VALUE DSTRP_M  
-7 = '-7 RF'  
-8 = '-8 DK'  
-1 = '-1 Inapplicable'  
-999 = '-999 Inapplicable'  
other = 'Values ranging between -544.732 and 924.863';
```

```
VALUE FQ_4F  
-7 = '-7 RF'  
-8 = '-8 DK'
```

## SAS ALGORITHM FOR DEMENTIA

```
-1 = '-1 Inapplicable'  
-9 = '-9 Missing'  
 1='1 YES'  
 2='2 NO';
```

```
VALUE CHILDDDEC  
 1 = '1 CHILD DECEASED'  
-7 = '-7 RF'  
-8 = '-8 DK'  
-1 = '-1 Inapplicable'  
-9 = '-9 Missing';
```

```
VALUE W200001W  
 12 = "12 STARTED"  
 20 = "20 COMPLETE"  
 21 = "21 INELIGIBLE - NOT 65+" ;
```

```
VALUE W200008x  
-7 = '-7 RF'  
-8 = '-8 DK'  
-1 = '-1 Inapplicable'  
-9 = '-9 Missing'  
 1 = "1 UNDER 20"  
 2 = "2 20-24"  
 3 = "3 25-29"  
 4 = "4 30-34"  
 5 = "5 35-39"  
 6 = "6 40-44"  
 7 = "7 45-49"  
 8 = "8 50-54"  
 9 = "9 55-59"  
10 = "10 60-64"  
11 = "11 65-69"  
12 = "12 70-74"  
13 = "13 75-79"  
14 = "14 80-84"  
15 = "15 85-89"  
16 = "16 90 +";
```

```
VALUE W200009W  
-7 = '-7 RF'  
-8 = '-8 DK'  
-1 = '-1 Inapplicable'  
-9 = '-9 Missing'  
 1 = "1 SAMPLE PERSON"  
 2 = "2 SPOUSE/ PARTNER"  
 3 = "3 DAUGHTER"  
 4 = "4 SON"  
 5 = "5 DAUGHTER-IN-LAW"  
 6 = "6 SON-IN-LAW"  
 7 = "7 STEPDAUGHTER"  
 8 = "8 STEPSON"  
 9 = "9 SISTER"  
10 = "10 BROTHER"  
11 = "11 SISTER-IN-LAW"  
12 = "12 BROTHER-IN-LAW"  
13 = "13 MOTHER"
```



## SAS ALGORITHM FOR DEMENTIA

```
14 = "14 STEPMOTHER"  
15 = "15 MOTHER-IN-LAW"  
16 = "16 FATHER"  
17 = "17 STEPFATHER"  
18 = "18 FATHER-IN-LAW"  
19 = "19 GRANDDAUGHTER"  
20 = "20 GRANDSON"  
21 = "21 NIECE"  
22 = "22 NEPHEW"  
23 = "23 AUNT"  
24 = "24 UNCLE"  
25 = "25 COUSIN"  
26 = "26 STEPDAUGHTER'S SON/ DAUGHTER"  
27 = "27 STEPSON'S SON/ DAUGHTER"  
28 = "28 DAUGHTER-IN-LAW'S SON/ DAUGHTER"  
29 = "29 SON-IN-LAW'S SON/ DAUGHTER"  
30 = "30 BOARDER/RENTER"  
31 = "31 PAID AIDE/ HOUSEKEEPER/ EMPLOYEE"  
32 = "32 ROOMMATE"  
33 = "33 EX-WIFE/ EX-HUSBAND"  
34 = "34 BOYFRIEND/ GIRLFRIEND"  
35 = "35 NEIGHBOR"  
36 = "36 FRIEND"  
37 = "37 SOMEONE/SERVICE AT THE PLACE SP LIVES/LIVED"  
38 = "38 CO-WORKER"  
39 = "39 MINISTER, PRIEST, OR OTHER CLERGY"  
40 = "40 PSYCHIATRIST, PSYCHOLOGIST, COUNSELOR, OR THERAPIST"  
41 = "41 DECEASED SPOUSE/PARTNER"  
91 = "91 OTHER RELATIVE"  
92 = "92 OTHER NONRELATIVE" ;
```

```
VALUE W200002W
```

```
-7 = '-7 RF'  
-8 = '-8 DK'  
-1 = '-1 Inapplicable'  
-9 = '-9 Missing'  
1 = "1 MALE"  
2 = "2 FEMALE";
```

```
VALUE W200005W
```

```
-7 = '-7 RF'  
-8 = '-8 DK'  
-1 = '-1 Inapplicable'  
-9 = '-9 Missing'  
1 = "1 NO SCHOOLING COMPLETED"  
2 = "2 1ST-8TH GRADE"  
3 = "3 9TH-12TH GRADE (NO DIPLOMA)"  
4 = "4 HIGH SCHOOL GRADUATE (HIGH SCHOOL DIPLOMA OR EQUIVALENT)"  
5 = "5 VOCATIONAL, TECHNICAL, BUSINESS, OR TRADE SCHOOL CERTIFICATE OR  
DIPLOMA (BEYOND HIGH SCHOOL LEVEL)"  
6 = "6 SOME COLLEGE BUT NO DEGREE"  
7 = "7 ASSOCIATE'S DEGREE"  
8 = "8 BACHELOR'S DEGREE"  
9 = "9 MASTER'S, PROFESSIONAL, OR DOCTORAL DEGREE" ;
```

```
VALUE W200010W
```

```
-7 = '-7 RF'
```

## SAS ALGORITHM FOR DEMENTIA

```
-8 = '-8 DK'
-1 = '-1 Inapplicable'
-9 = '-9 Missing'
 1 = "1 MARRIED"
 2 = "2 LIVING WITH A PARTNER"
 3 = "3 SEPARATED"
 4 = "4 DIVORCED"
 5 = "5 WIDOWED"
 6 = "6 NEVER MARRIED";

VALUE W200011W
-7 = '-7 RF'
-8 = '-8 DK'
-1 = '-1 Inapplicable'
-9 = '-9 Missing'
 1 = "1 YES"
 2 = "2 NO"
 7 = "7 PREVIOUSLY REPORTED" ;

VALUE W200012W
-7 = '-7 RF'
-8 = '-8 DK'
-1 = '-1 Inapplicable'
-9 = '-9 Missing'
 1 = "1 REGULAR"
 2 = "2 VARIED" ;

VALUE W200013W
-7 = '-7 RF'
-8 = '-8 DK'
-1 = '-1 Inapplicable'
-9 = '-9 Missing'
 1 = "1 SP AND/OR FAMILY"
 2 = "2 GOVERNMENT PROGRAM"
 3 = "3 INSURANCE"
91 = "91 OTHER (SPECIFY)" ;

VALUE W200015W
-7 = '-7 RF'
-8 = '-8 DK'
-1 = '-1 Inapplicable'
-9 = '-9 Missing'
 1='1 HOURLY'
 2='2 WEEKLY'
 3='3 MONTHLY'
 4='4 DID NOT PAY IN LAST MONTH'
 91 = "91 OTHER (SPECIFY)" ;

VALUE W200016W
-7 = '-7 RF'
-8 = '-8 DK'
-1 = '-1 Inapplicable'
-9 = '-9 Missing'
 1 = "1 MEDICAID"
 2 = "2 MEDICARE"
 3 = "3 STATE PROGRAM"
91 = "91 OTHER (SPECIFY)" ;
```

## SAS ALGORITHM FOR DEMENTIA

```
VALUE W200018W
-7 = '-7 RF'
-8 = '-8 DK'
-1 = '-1 Inapplicable'
-9 = '-9 Missing'
1 = "1 FREE-STANDING (DETACHED) SINGLE HOUSE"
2 = "2 SINGLE HOUSE BUT ATTACHED TO OTHERS (ROW HOUSE, TOWNHOUSE, DUPLEX,
TRIPLEX, OR TRIPLE DECKER)"
3 = "3 MOBILE HOME OR TRAILER"
4 = "4 MULTI-UNIT (2+) BUILDING"
91 = "91 OTHER (SPECIFY)" ;

VALUE W200020W
-7 = '-7 RF'
-8 = '-8 DK'
-1 = '-1 Inapplicable'
-9 = '-9 Missing'
1 = "1 HOME"
2 = "2 MULTI-UNIT"
3 = "3 OTHER" ;

VALUE W200021W
-7 = '-7 RF'
-8 = '-8 DK'
-1 = '-1 Inapplicable'
-9 = '-9 Missing'
1 = "1 BUILDING HAS ONE FLOOR"
2 = "2 BUILDING HAS MULTIPLE FLOORS" ;

VALUE W200022W
-7 = '-7 RF'
-8 = '-8 DK'
-1 = '-1 Inapplicable'
-9 = '-9 Missing'
1 = "1 HOME"
2 = "2 APARTMENT"
3 = "3 ROOM"
4 = "4 UNIT"
5 = "5 SUITE"
6 = "6 SOMETHING ELSE (SPECIFY)" ;

VALUE W200030W
-7 = '-7 RF'
-8 = '-8 DK'
-1 = '-1 Inapplicable'
-9 = '-9 Missing'
1 = "1 SAMPLE PERSON (SP)"
2 = "2 PROXY" ;

VALUE W200032W
-7 = '-7 RF'
-8 = '-8 DK'
-1 = '-1 Inapplicable'
-9 = '-9 Missing'
1 = "1 HOSPITAL"
2 = "2 NURSING HOME/REHAB CENTER"
91 = "91 OTHER (SPECIFY)" ;
```

## SAS ALGORITHM FOR DEMENTIA

```
VALUE W200035W
-1 = '-1 Inapplicable'
-9 = '-9 Missing'
 1 = "1 SELF"
 2 = "2 SPOUSE/ PARTNER"
 3 = "3 DAUGHTER"
 4 = "4 SON"
 5 = "5 DAUGHTER-IN-LAW"
 6 = "6 SON-IN-LAW"
 7 = "7 STEPDAUGHTER"
 8 = "8 STEPSON"
 9 = "9 SISTER"
10 = "10 BROTHER"
11 = "11 SISTER-IN-LAW"
12 = "12 BROTHER-IN-LAW"
13 = "13 MOTHER"
14 = "14 STEPMOTHER"
15 = "15 MOTHER-IN-LAW"
16 = "16 FATHER"
17 = "17 STEPFATHER"
18 = "18 FATHER-IN-LAW"
19 = "19 GRANDDAUGHTER"
20 = "20 GRANDSON"
21 = "21 NIECE"
22 = "22 NEPHEW"
23 = "23 AUNT"
24 = "24 UNCLE"
25 = "25 COUSIN"
26 = "26 STEPDAUGHTER'S SON/ DAUGHTER"
27 = "27 STEPSON'S SON/ DAUGHTER"
28 = "28 DAUGHTER-IN-LAW'S SON/ DAUGHTER"
29 = "29 SON-IN-LAW'S SON/ DAUGHTER"
30 = "30 BOARDER/RENTER"
31 = "31 PAID AIDE/ HOUSEKEEPER/ EMPLOYEE"
32 = "32 ROOMMATE"
33 = "33 EX-WIFE/ EX-HUSBAND"
34 = "34 BOYFRIEND/ GIRLFRIEND"
35 = "35 NEIGHBOR"
36 = "36 FRIEND"
37 = "37 SOMEONE/SERVICE FROM THE PLACE SP LIVES/DIED"
38 = "38 CO-WORKER"
39 = "39 MINISTER, PRIEST, OR OTHER CLERGY"
40 = "40 PSYCHIATRIST, PSYCHOLOGIST, COUNSELOR, OR THERAPIST"
91 = "91 OTHER RELATIVE"
92 = "92 OTHER NONRELATIVE" ;

VALUE W200036W
-7 = '-7 RF'
-8 = '-8 DK'
-1 = '-1 Inapplicable'
-9 = '-9 Missing'
 1 = "1 VERY FAMILIAR"
 2 = "2 SOMEWHAT FAMILIAR"
 3 = "3 A LITTLE FAMILIAR"
 4 = "4 NOT AT ALL FAMILIAR" ;
```

## SAS ALGORITHM FOR DEMENTIA

```
VALUE W200037W
-7 = '-7 RF'
-8 = '-8 DK'
-1 = '-1 Inapplicable'
-9 = '-9 Missing'
1 = "1 YES, SAME ADDRESS"
2 = "2 NO, DIFFERENT ADDRESS"
3 = "3 YES, SAME ADDRESS WITH MINOR CORRECTIONS" ;
```

```
VALUE W200038W
-7 = '-7 RF'
-8 = '-8 DK'
-1 = '-1 Inapplicable'
-9 = '-9 Missing'
1 = "1 JANUARY"
2 = "2 FEBRUARY"
3 = "3 MARCH"
4 = "4 APRIL"
5 = "5 MAY"
6 = "6 JUNE"
7 = "7 JULY"
8 = "8 AUGUST"
9 = "9 SEPTEMBER"
10 = "10 OCTOBER"
11 = "11 NOVEMBER"
12 = "12 DECEMBER" ;
```

```
VALUE W200039W
-7 = '-7 RF'
-8 = '-8 DK'
-1 = '-1 Inapplicable'
-9 = '-9 Missing'
1 = "1 2011"
2 = "2 2012"
3 = "3 YEAR2013"
4 = "4 YEAR2014"
5 = "5 YEAR2015"
6 = "6 YEAR2016"
7 = "7 YEAR2017"
8 = "8 YEAR2018"
9 = "9 YEAR2019"
10 = "10 YEAR2020" ;
```

```
VALUE W200040W
-7 = '-7 RF'
-8 = '-8 DK'
-1 = '-1 Inapplicable'
-9 = '-9 Missing'
1 = "1 2011"
2 = "2 2012" ;
```

```
VALUE W200041W
-7 = '-7 RF'
-8 = '-8 DK'
-1 = '-1 Inapplicable'
-9 = '-9 Missing'
1 = "1 AT SPS OR SOMEONE ELSE'S HOME"
```

## SAS ALGORITHM FOR DEMENTIA

```
2 = "2 IN A HOSPITAL"  
3 = "3 IN A NURSING HOME"  
4 = "4 IN A HOSPICE RESIDENCE"  
5 = "5 IN TRANSIT (AMBULANCE TO HOSPITAL)"  
91 = "91 SOMEWHERE ELSE (SPECIFY)";
```

```
VALUE W200042W
```

```
-7 = '-7 RF'  
-8 = '-8 DK'  
-1 = '-1 Inapplicable'  
-9 = '-9 Missing'  
1 = "1 SP'S HOME"  
2 = "2 SOMEONE ELSE'S HOME" ;
```

```
VALUE W200043W
```

```
-7 = '-7 RF'  
-8 = '-8 DK'  
-1 = '-1 Inapplicable'  
-9 = '-9 Missing'  
1 = "1 INTENSIVE CARE UNIT"  
2 = "2 PALLIATIVE CARE UNIT"  
3 = "3 INPATIENT HOSPICE UNIT"  
4 = "4 EMERGENCY ROOM"  
5 = "5 ANOTHER KIND OF UNIT" ;
```

```
VALUE W200044W
```

```
-7 = '-7 RF'  
-8 = '-8 DK'  
-1 = '-1 Inapplicable'  
-9 = '-9 Missing'  
1 = "1 HOSPICE AT A HOSPITAL"  
2 = "2 HOSPICE AT A NURSING HOME"  
3 = "3 RESIDENTIAL HOSPICE"  
4 = "4 OTHER HOSPICE" ;
```

```
VALUE W200045W
```

```
-7 = '-7 RF'  
-8 = '-8 DK'  
-1 = '-1 Inapplicable'  
-9 = '-9 Missing'  
1 = "1 DAYS"  
2 = "2 WEEKS"  
3 = "3 MONTHS"  
4 = "4 YEARS" ;
```

```
VALUE W200046W
```

```
-7 = '-7 RF'  
-8 = '-8 DK'  
-1 = '-1 Inapplicable'  
-9 = '-9 Missing'  
1 = "1 AT SP'S HOME"  
2 = "2 IN A HOSPITAL"  
3 = "3 IN A NURSING HOME"  
4 = "4 IN A HOSPICE RESIDENCE"  
91 = "91 SOMEWHERE ELSE (SPECIFY)" ;
```

```
VALUE W200047W
```

## SAS ALGORITHM FOR DEMENTIA

```
-7 = '-7 RF'  
-8 = '-8 DK'  
-1 = '-1 Inapplicable'  
-9 = '-9 Missing'  
1 = "1 EVERY DAY"  
2 = "2 MOST DAYS"  
3 = "3 SOME DAYS"  
4 = "4 RARELY"  
5 = "5 NOT AT ALL" ;
```

VALUE W200048W

```
-7 = '-7 RF'  
-8 = '-8 DK'  
-1 = '-1 Inapplicable'  
-9 = '-9 Missing'  
1 = "1 LESS THAN WAS NEEDED"  
2 = "2 MORE THAN WAS NEEDED"  
3 = "3 ABOUT RIGHT AMOUNT" ;
```

VALUE W200049W

```
-7 = '-7 RF'  
-8 = '-8 DK'  
-1 = '-1 Inapplicable'  
-9 = '-9 Missing'  
1 = "1 YES"  
2 = "2 NO"  
3 = "3 DOES NOT APPLY/NO CARE IN LAST MONTH OF LIFE" ;
```

VALUE W200050W

```
-7 = '-7 RF'  
-8 = '-8 DK'  
-1 = '-1 Inapplicable'  
-9 = '-9 Missing'  
1 = "1 ALWAYS"  
2 = "2 USUALLY"  
3 = "3 SOMETIMES"  
4 = "4 NEVER"  
5 = "5 DOES NOT APPLY/NO CARE IN LAST MONTH OF LIFE" ;
```

VALUE W200051W

```
-7 = '-7 RF'  
-8 = '-8 DK'  
-1 = '-1 Inapplicable'  
-9 = '-9 Missing'  
1 = "1 EXCELLENT"  
2 = "2 VERY GOOD"  
3 = "3 GOOD"  
4 = "4 FAIR"  
5 = "5 POOR" ;
```

VALUE W200052W

```
-7 = '-7 RF'  
-8 = '-8 DK'  
-1 = '-1 Inapplicable'  
-9 = '-9 Missing'  
1 = "1 NOT AT ALL"  
2 = "2 SEVERAL DAYS"
```

## SAS ALGORITHM FOR DEMENTIA

```
3 = "3 MORE THAN HALF THE DAYS"  
4 = "4 NEARLY EVERY DAY" ;
```

```
VALUE W200053W
```

```
-7 = '-7 RF'  
-8 = '-8 DK'  
-1 = '-1 Inapplicable'  
-9 = '-9 Missing'  
1 = "1 EVERY NIGHT (7 NIGHTS A WEEK)"  
2 = "2 MOST NIGHTS (5-6 NIGHTS A WEEK)"  
3 = "3 SOME NIGHTS (2-4 NIGHTS A WEEK)"  
4 = "4 RARELY (ONCE A WEEK OR LESS)"  
5 = "5 NEVER" ;
```

```
VALUE W200054W
```

```
-7 = '-7 RF'  
-8 = '-8 DK'  
-1 = '-1 Inapplicable'  
-9 = '-9 Missing'  
1 = "1 EVERY NIGHT (7 NIGHTS A WEEK)"  
2 = "2 MOST NIGHTS (5-6 NIGHTS A WEEK)"  
3 = "3 SOME NIGHTS (2-4 NIGHTS A WEEK)"  
4 = "4 RARELY (ONCE A WEEK OR LESS)"  
5 = "5 NEVER"  
7 = "7 DON'T WAKE UP/NOT A PROBLEM" ;
```

```
VALUE W200055W
```

```
-7 = '-7 RF'  
-8 = '-8 DK'  
-1 = '-1 Inapplicable'  
-9 = '-9 Missing'  
1 = "1 PRIVATE RESIDENCE"  
2 = "2 A GROUP HOME, BOARD AND CARE, OR SUPERVISED HOUSING"  
3 = "3 ASSISTED LIVING FACILITY OR CONTINUING CARE RETIREMENT COMMUNITY  
(CCRC)"  
4 = "4 RELIGIOUS GROUP QUARTERS"  
91 = "91 OTHER (SPECIFY)" ;
```

```
VALUE W200056W
```

```
-7 = '-7 RF'  
-8 = '-8 DK'  
-1 = '-1 Inapplicable'  
-9 = '-9 Missing'  
1 = "1 YES"  
2 = "2 NO"  
7 = "7 PLACE DOES NOT HAVE A NAME" ;
```

```
VALUE W200057W
```

```
-7 = '-7 RF'  
-8 = '-8 DK'  
-1 = '-1 Inapplicable'  
-9 = '-9 Missing'  
1 = "1 APARTMENT"  
2 = "2 ROOM"  
3 = "3 UNIT"  
4 = "4 SUITE"  
91 = "91 SOMETHING ELSE (SPECIFY)" ;
```



## SAS ALGORITHM FOR DEMENTIA

VALUE W200058W

-7 = '-7 RF'  
-8 = '-8 DK'  
-1 = '-1 Inapplicable'  
-9 = '-9 Missing'  
1 = "1 YES"  
2 = "2 NO, DIFFERENT PERSON"  
3 = "3 NO, NAME MISPELLED" ;

VALUE W200060W

-7 = '-7 RF'  
-8 = '-8 DK'  
-1 = '-1 Inapplicable'  
-9 = '-9 Missing'  
1 = "1 PRIVATE RESIDENCE"  
2 = "2 A GROUP HOME, BOARD AND CARE, OR SUPERVISED HOUSING"  
3 = "3 ASSISTED LIVING FACILITY OR CONTINUING CARE RETIREMENT COMMUNITY  
(CCRC)"  
5 = "5 NURSING HOME"  
91 = "91 OTHER (SPECIFY)" ;

VALUE W200061W

-7 = '-7 RF'  
-8 = '-8 DK'  
-1 = '-1 Inapplicable'  
-9 = '-9 Missing'  
1 = "1 SEPARATION OR DIVORCE"  
2 = "2 DECEASED"  
3 = "3 MOVED ELSEWHERE"  
5 = "5 LAST INTERVIEW INFORMATION INCORRECT"  
8 = "8 OTHER REASON" ;

VALUE W200067W

-7 = '-7 RF'  
-8 = '-8 DK'  
-1 = '-1 Inapplicable'  
-9 = '-9 Missing'  
1 = "1 COMMON OR SHARED ENTRANCE"  
2 = "2 ENTRANCE DIRECTLY INTO HOME" ;

VALUE W200068W

-7 = '-7 RF'  
-8 = '-8 DK'  
-1 = '-1 Inapplicable'  
-9 = '-9 Missing'  
1 = "1"  
2 = "2"  
3 = "3"  
4 = "4+" ;

VALUE W200069W

-7 = '-7 RF'  
-8 = '-8 DK'  
-1 = '-1 Inapplicable'  
-9 = '-9 Missing'  
1 = "1 ALL ITEMS HERE"

## SAS ALGORITHM FOR DEMENTIA

```
    2 = "2 ADDED ONE OR MORE ITEMS" ;

VALUE W200070W
-7 = '-7 RF'
-8 = '-8 DK'
-1 = '-1 Inapplicable'
-9 = '-9 Missing'
 1 = "1 MORE THAN $500"
 2 = "2 LESS THAN $500"
 3 = "3 JUST ABOUT $500" ;

VALUE W200071W
-7 = '-7 RF'
-8 = '-8 DK'
-1 = '-1 Inapplicable'
-9 = '-9 Missing'
 1 = "1 MORE THAN $1,000"
 2 = "2 LESS THAN $1,000"
 3 = "3 JUST ABOUT $1,000" ;

VALUE W200072W
-7 = '-7 RF'
-8 = '-8 DK'
-1 = '-1 Inapplicable'
-9 = '-9 Missing'
 1 = "1 MORE THAN $100"
 2 = "2 LESS THAN $100"
 3 = "3 JUST ABOUT $100" ;

VALUE W200073W
-7 = '-7 RF'
-8 = '-8 DK'
-1 = '-1 Inapplicable'
-9 = '-9 Missing'
 1 = "1 YES"
 2 = "2 NO"
 7 = "7 YES, DOESNT KNOW HOW TO USE A COMPUTER" ;

VALUE W200074W
-7 = '-7 RF'
-8 = '-8 DK'
-1 = '-1 Inapplicable'
-9 = '-9 Missing'
 1 = "1 MOST DAYS"
 2 = "2 SOME DAYS"
 3 = "3 RARELY" ;

VALUE W200076W
-7 = '-7 RF'
-8 = '-8 DK'
-1 = '-1 Inapplicable'
-9 = '-9 Missing'
 1 = "1 YES"
 2 = "2 NO"
 7 = "7 DEAF" ;

VALUE W200077W
```

## SAS ALGORITHM FOR DEMENTIA

```
-7 = '-7 RF'  
-8 = '-8 DK'  
-1 = '-1 Inapplicable'  
-9 = '-9 Missing'  
1 = "1 YES"  
2 = "2 NO"  
7 = "7 BLIND" ;
```

VALUE W200078W

```
-7 = '-7 RF'  
-8 = '-8 DK'  
-1 = '-1 Inapplicable'  
-9 = '-9 Missing'  
1 = "1 EVERY DAY (7 DAYS A WEEK)"  
2 = "2 MOST DAYS (5-6 DAYS A WEEK)"  
3 = "3 SOME DAYS (2-4 DAYS A WEEK)"  
4 = "4 RARELY (ONCE A WEEK OR LESS)"  
5 = "5 NEVER" ;
```

VALUE W200080W

```
-7 = '-7 RF'  
-8 = '-8 DK'  
-1 = '-1 Inapplicable'  
-9 = '-9 Missing'  
1 = "1 YES, A CHANGE"  
2 = "2 NO, NO CHANGE"  
3 = "3 DEMENTIA/ALZHEIMER'S REPORTED BY PROXY" ;
```

VALUE W200081W

```
-7 = '-7 RF'  
-8 = '-8 DK'  
-1 = '-1 Inapplicable'  
-9 = '-9 Missing'  
1 = "1 SP HAS DEMENTIA/ALZHEIMER'S/ NOT ABLE"  
2 = "2 SP IS UNABLE TO SPEAK"  
3 = "3 SP IS UNABLE TO HEAR"  
4 = "4 SP REFUSED"  
5 = "5 PROXY REFUSED"  
6 = "6 SP NOT PRESENT"  
7 = "7 SP TOO ILL"  
8 = "8 SP LANGUAGE BARRIER"  
91 = "91 OTHER (SPECIFY)" ;
```

VALUE W200082W

```
-7 = '-7 RF'  
-8 = '-8 DK'  
-1 = '-1 Inapplicable'  
-9 = '-9 Missing'  
1 = "1 MUCH BETTER"  
2 = "2 BETTER"  
3 = "3 SAME"  
4 = "4 WORSE"  
5 = "5 MUCH WORSE" ;
```

VALUE W200083W

```
-7 = '-7 RF'  
-8 = '-8 DK'
```

## SAS ALGORITHM FOR DEMENTIA

```
-1 = '-1 Inapplicable'  
-9 = '-9 Missing'  
1 = "1 YES"  
2 = "2 NO/DON'T KNOW" ;
```

```
VALUE W200084W  
-7 = '-7 RF'  
-8 = '-8 DK'  
-1 = '-1 Inapplicable'  
-9 = '-9 Missing'  
1 = "1 CONTINUE WITH ACTIVITY"  
2 = "2 SP REFUSES ACTIVITY" ;
```

```
VALUE W200085W  
-1 = '-1 Inapplicable'  
-9 = '-9 Missing'  
1 = "Word[1]"  
2 = "Word[2]"  
3 = "Word[3]"  
4 = "Word[4]"  
5 = "Word[5]"  
6 = "Word[6]"  
7 = "Word[7]"  
8 = "Word[8]"  
9 = "Word[9]"  
10 = "Word[10]"  
91 = "91 NO WORDS REMEMBERED"  
92 = "92 REFUSED" ;
```

```
VALUE W200086W  
-7 = '-7 RF'  
-8 = '-8 DK'  
-1 = '-1 Inapplicable'  
-9 = '-9 Missing'  
1 = "1 DIFFICULTY HEARING ANY OF THE WORDS"  
2 = "2 INTERRUPTION OCCURRED WHILE LIST WAS BEING READ"  
91 = "91 OTHER PROBLEM (SPECIFY)"  
92 = "92 NO PROBLEMS OCCURRED"  
97 = "97 SP REFUSED WORD RECALL TASK" ;
```

```
VALUE W200087W  
-1 = '-1 Inapplicable'  
-9 = '-9 Missing'  
1 = "1 SP ATTEMPTED CLOCK DRAWING"  
2 = "2 SP DID NOT ATTEMPT CLOCK DRAWING"  
97 = "3 SP REFUSED CLOCK DRAWING" ;
```

```
VALUE W200089W  
-7 = '-7 RF'  
-8 = '-8 DK'  
-1 = '-1 Inapplicable'  
-9 = '-9 Missing'  
1 = "1 EVERY DAY (7 DAYS A WEEK)"  
2 = "2 MOST DAYS (5-6 DAYS A WEEK)"  
3 = "3 SOME DAYS (2-4 DAYS A WEEK)"  
4 = "4 RARELY (ONCE A WEEK OR LESS)"  
5 = "5 NEVER" ;
```

## SAS ALGORITHM FOR DEMENTIA

VALUE W200090W

-7 = '-7 RF'  
-8 = '-8 DK'  
-1 = '-1 Inapplicable'  
-9 = '-9 Missing'  
1 = "1 EVERY TIME"  
2 = "2 MOST TIMES"  
3 = "3 SOMETIMES"  
4 = "4 RARELY"  
5 = "5 NEVER" ;

VALUE W200092W

-7 = '-7 RF'  
-8 = '-8 DK'  
-1 = '-1 Inapplicable'  
-9 = '-9 Missing'  
1 = "1 MOST TIMES"  
2 = "2 SOMETIMES"  
3 = "3 RARELY"  
4 = "4 NEVER" ;

VALUE W200093W

-7 = '-7 RF'  
-8 = '-8 DK'  
-1 = '-1 Inapplicable'  
-9 = '-9 Missing'  
1 = "1 NONE"  
2 = "2 A LITTLE"  
3 = "3 SOME"  
4 = "4 A LOT" ;

VALUE W200094W

-7 = '-7 RF'  
-8 = '-8 DK'  
-1 = '-1 Inapplicable'  
-9 = '-9 Missing'  
1 = "1 MORE OFTEN"  
2 = "2 LESS OFTEN"  
3 = "3 ABOUT THE SAME" ;

VALUE W200095W

-7 = '-7 RF'  
-8 = '-8 DK'  
-1 = '-1 Inapplicable'  
-9 = '-9 Missing'  
1 = "1 JANUARY"  
2 = "2 FEBRUARY"  
3 = "3 MARCH"  
4 = "4 APRIL"  
5 = "5 MAY"  
6 = "6 JUNE"  
7 = "7 JULY"  
8 = "8 AUGUST"  
9 = "9 SEPTEMBER"  
10 = "10 OCTOBER"  
11 = "11 NOVEMBER"

## SAS ALGORITHM FOR DEMENTIA

```
12 = "12 DECEMBER"
90 = "90 LAST INTERVIEW INFORMATION INCORRECT" ;

VALUE W200096W
-7 = '-7 RF'
-8 = '-8 DK'
-1 = '-1 Inapplicable'
-9 = '-9 Missing'
1 = "1 YES"
2 = "2 NO"
90 = "90 LAST INTERVIEW INFORMATION INCORRECT" ;

VALUE W200097W
-7 = '-7 RF'
-8 = '-8 DK'
-1 = '-1 Inapplicable'
-9 = '-9 Missing'
1 = "1 YES"
2 = "2 NO / NO LONGER DRIVE" ;

VALUE W200098W
-7 = '-7 RF'
-8 = '-8 DK'
-1 = '-1 Inapplicable'
-9 = '-9 Missing'
1 = "1 YES"
2 = "2 NO"
7 = "7 NO, NO RAIN OR BAD WEATHER" ;

VALUE W200099W
-7 = '-7 RF'
-8 = '-8 DK'
-1 = '-1 Inapplicable'
-9 = '-9 Missing'
1 = "1 ALWAYS DID IT BY SELF"
2 = "2 ALWAYS DID IT TOGETHER WITH SOMEONE ELSE"
3 = "3 SOMEONE ELSE ALWAYS DID IT"
4 = "4 IT VARIED (MORE THAN ONE WAY)"
5 = "5 NOT DONE IN LAST MONTH" ;

VALUE W200102W
-7 = '-7 RF'
-8 = '-8 DK'
-1 = '-1 Inapplicable'
-9 = '-9 Missing'
1 = "1 MORE OFTEN"
2 = "2 LESS OFTEN"
3 = "3 SAME" ;

VALUE W200106W
-7 = '-7 RF'
-8 = '-8 DK'
-1 = '-1 Inapplicable'
-9 = '-9 Missing'
1 = "1 YES"
2 = "2 NO"
7 = "7 ALWAYS FED THROUGH IV OR TUBE" ;
```

## SAS ALGORITHM FOR DEMENTIA

VALUE W200107W

-7 = '-7 RF'  
-8 = '-8 DK'  
-1 = '-1 Inapplicable'  
-9 = '-9 Missing'  
1 = "1 EVERY TIME"  
2 = "2 MOST TIMES"  
3 = "3 SOMETIMES"  
4 = "4 RARELY" ;

VALUE W200109W

-7 = '-7 RF'  
-8 = '-8 DK'  
-1 = '-1 Inapplicable'  
-9 = '-9 Missing'  
1 = "1 SHOWERING"  
2 = "2 TAKING BATHS"  
3 = "3 WASHING UP SOME OTHER WAY" ;

VALUE W200114W

-7 = '-7 RF'  
-8 = '-8 DK'  
-1 = '-1 Inapplicable'  
-9 = '-9 Missing'  
1 = "1 VERY IMPORTANT"  
2 = "2 SOMEWHAT IMPORTANT"  
3 = "3 NOT SO IMPORTANT" ;

VALUE W200115W

-7 = '-7 RF'  
-8 = '-8 DK'  
-1 = '-1 Inapplicable'  
-9 = '-9 Missing'  
1 = "1 YES"  
2 = "2 NO"  
95 = "95 NO ACTIVITY LISTED" ;

VALUE W200116W

-7 = '-7 RF'  
-8 = '-8 DK'  
-1 = '-1 Inapplicable'  
-9 = '-9 Missing'  
1 = "1 LEFT"  
2 = "2 RIGHT"  
3 = "3 BOTH" ;

VALUE W200117W

-7 = '-7 RF'  
-8 = '-8 DK'  
-1 = '-1 Inapplicable'  
-9 = '-9 Missing'  
1 = "1 LEFT SIDE"  
2 = "2 RIGHT SIDE"  
3 = "3 BOTH SIDES" ;

## SAS ALGORITHM FOR DEMENTIA

VALUE W200118W

-7 = '-7 RF'  
-8 = '-8 DK'  
-1 = '-1 Inapplicable'  
-9 = '-9 Missing'  
1 = "1 ONE SIDE"  
2 = "2 BOTH SIDES" ;

VALUE W200119W

-7 = '-7 RF'  
-8 = '-8 DK'  
-1 = '-1 Inapplicable'  
-9 = '-9 Missing'  
1 = "1 RECEIVE ALL TREATMENTS"  
2 = "2 STOP/REJECT ALL TREATMENTS" ;

VALUE W200120W

-7 = '-7 RF'  
-8 = '-8 DK'  
-1 = '-1 Inapplicable'  
-9 = '-9 Missing'  
1 = "1 LIVING IN THEIR OWN HOME WITH HELP FROM FRIENDS AND FAMILY"  
2 = "2 LIVING IN THEIR OWN HOME WITH HELP FROM SOMEONE PAID TO COME IN"  
3 = "3 LIVING WITH AN ADULT CHILD"  
4 = "4 LIVING IN AN ASSISTED LIVING FACILITY OR CONTINUING CARE  
RESIDENCE"  
5 = "5 LIVING IN A NURSING HOME" ;

VALUE W200121W

-7 = '-7 RF'  
-8 = '-8 DK'  
-1 = '-1 Inapplicable'  
-9 = '-9 Missing'  
1 = "1 YES"  
2 = "2 NO"  
3 = "3 DOESNT HAVE ANY MONEY TO PAY A CAREGIVER"  
4 = "4 WOULD NOT USE A PAID CAREGIVER" ;

VALUE W200122W

-7 = '-7 RF'  
-8 = '-8 DK'  
-1 = '-1 Inapplicable'  
-9 = '-9 Missing'  
1 = "1 MAKE DECISIONS WITHOUT MUCH ADVICE FROM THEM"  
2 = "2 GET THEIR ADVICE AND THEN MAKE DECISIONS"  
3 = "3 MAKE DECISIONS TOGETHER"  
4 = "4 LEAVE DECISIONS UP TO THEM" ;

VALUE W200123W

-7 = '-7 RF'  
-8 = '-8 DK'  
-1 = '-1 Inapplicable'  
-9 = '-9 Missing'  
1 = "1 HANDLE MOSTLY BY SELF"  
2 = "2 HANDLE TOGETHER WITH FAMILY OR CLOSE FRIENDS"  
3 = "3 FAMILY OR CLOSE FRIENDS MOSTLY HANDLE THESE THINGS"  
4 = "4 IT VARIES" ;



## SAS ALGORITHM FOR DEMENTIA

VALUE W200124W

-7 = '-7 RF'  
-8 = '-8 DK'  
-1 = '-1 Inapplicable'  
-9 = '-9 Missing'  
1 = "1 NEVER"  
2 = "2 RARELY"  
3 = "3 SOMETIMES"  
4 = "4 OFTEN" ;

VALUE W200126W

-7 = '-7 RF'  
-8 = '-8 DK'  
-1 = '-1 Inapplicable'  
-9 = '-9 Missing'  
1 = "1 AGREE A LOT"  
2 = "2 AGREE A LITTLE"  
3 = "3 DO NOT AGREE" ;

VALUE W200127W

-7 = '-7 RF'  
-8 = '-8 DK'  
-1 = '-1 Inapplicable'  
-9 = '-9 Missing'  
1 = "1 AGREE A LOT"  
2 = "2 AGREE A LITTLE"  
3 = "3 AGREE NOT AT ALL" ;

VALUE W200129W

-7 = '-7 RF'  
-8 = '-8 DK'  
-1 = '-1 Inapplicable'  
-9 = '-9 Missing'  
1 = "1 less than \$1,000,"  
2 = "2 \$1,000 to less than \$2,000,"  
3 = "3 \$2,000 to less than \$3,000,"  
4 = "4 \$3,000 to less than \$5,000, or"  
5 = "5 \$5,000 or more?" ;

VALUE W200131W

-7 = '-7 RF'  
-8 = '-8 DK'  
-1 = '-1 Inapplicable'  
-9 = '-9 Missing'  
1 = "1 YES"  
2 = "2 NO"  
3 = "3 RETIRED/DON'T WORK ANYMORE" ;

VALUE W200132W

-7 = '-7 RF'  
-8 = '-8 DK'  
-1 = '-1 Inapplicable'  
-9 = '-9 Missing'  
1 = "1 EVERY WEEK"  
2 = "2 EVERY TWO WEEKS"  
3 = "3 TWO TIMES A MONTH"

## SAS ALGORITHM FOR DEMENTIA

```
4 = "4 ONCE A MONTH"  
5 = "5 DAILY"  
91 = "91 OTHER SCHEDULE (SPECIFY)" ;  
  
VALUE W200133W  
-7 = '-7 RF'  
-8 = '-8 DK'  
-1 = '-1 Inapplicable'  
-9 = '-9 Missing'  
1 = "1 OWN"  
2 = "2 RENT"  
3 = "3 SOME OTHER ARRANGEMENT" ;  
  
VALUE W200134W  
-7 = '-7 RF'  
-8 = '-8 DK'  
-1 = '-1 Inapplicable'  
-9 = '-9 Missing'  
1 = "1 PAID OFF"  
2 = "2 STILL MAKE PAYMENTS"  
3 = "3 REVERSE MORTGAGE" ;  
  
VALUE W200135W  
-7 = '-7 RF'  
-8 = '-8 DK'  
-1 = '-1 Inapplicable'  
-9 = '-9 Missing'  
1 = "1 less than $250,"  
2 = "2 $250-$499,"  
3 = "3 $500-$999, or"  
4 = "4 $1,000 or more?" ;  
VALUE W500135W  
-7 = '-7 RF'  
-8 = '-8 DK'  
-1 = '-1 Inapplicable'  
-9 = '-9 Missing'  
1 = "1 less than $250"  
2 = "2 $250 to less than $500"  
3 = "3 $500 to less than $1,000"  
4 = "4 $1,000 to less than $3,000"  
5 = "5 $3,000 to less than $5,000"  
6 = "6 $5,000 or more?" ;  
VALUE W200136W  
-7 = '-7 RF'  
-8 = '-8 DK'  
-1 = '-1 Inapplicable'  
-9 = '-9 Missing'  
1 = "1 5 YEARS"  
2 = "2 10 YEARS"  
3 = "3 LONGER THAN 10 YEARS" ;  
  
VALUE W200137W  
-7 = '-7 RF'  
-8 = '-8 DK'  
-1 = '-1 Inapplicable'  
-9 = '-9 Missing'  
1 = "1 less than $50,000,"
```

## SAS ALGORITHM FOR DEMENTIA

```
2 = "2 between $50,000 and $100,000, or"  
3 = "3 over $100,000?" ;
```

```
VALUE W200138W
```

```
-7 = '-7 RF'  
-8 = '-8 DK'  
-1 = '-1 Inapplicable'  
-9 = '-9 Missing'  
1 = "1 less than $50,000,"  
2 = "2 $50,000-$74,999,"  
3 = "3 $75,000-$99,999,"  
4 = "4 $100,000-$199,999,"  
5 = "5 $200,000-$299,999,"  
6 = "6 $300,000-$499,999,"  
7 = "7 $500,000-$749,999, or"  
8 = "8 $750,000 or more?" ;
```

```
VALUE W200139W
```

```
-7 = '-7 RF'  
-8 = '-8 DK'  
-1 = '-1 Inapplicable'  
-9 = '-9 Missing'  
1 = "1 PAY OFF BALANCE"  
2 = "2 PAY MINIMUM"  
3 = "3 PAY MORE THAN MINIMUM, BUT NOT ENTIRE BALANCE"  
4 = "4 DON'T HAVE ANY CREDIT CARDS" ;
```

```
VALUE W200140W
```

```
-7 = '-7 RF'  
-8 = '-8 DK'  
-1 = '-1 Inapplicable'  
-9 = '-9 Missing'  
1 = "1 less than $1,000,"  
2 = "2 $1,000 - $1,999,"  
3 = "3 $2,000 - $3,999,"  
4 = "4 $4,000 - $5,999,"  
5 = "5 $6,000 - $9,999,"  
6 = "6 $10,000 - $19,999, or"  
7 = "7 $20,000 or more?" ;
```

```
VALUE W200141W
```

```
-7 = '-7 RF'  
-8 = '-8 DK'  
-1 = '-1 Inapplicable'  
-9 = '-9 Missing'  
1 = "1 MOST"  
2 = "2 SOME"  
3 = "3 A LITTLE" ;
```

```
VALUE W200142W
```

```
-7 = '-7 RF'  
-8 = '-8 DK'  
-1 = '-1 Inapplicable'  
-9 = '-9 Missing'  
1 = "1 less than $500,"  
2 = "2 $500 - $999,"  
3 = "3 $1,000 - $1,999,"
```

## SAS ALGORITHM FOR DEMENTIA

```
4 = "4 $2,000 - $3,999,"  
5 = "5 $4,000 - $5,999,"  
6 = "6 $6,000 - $9,999,"  
7 = "7 $10,000 - $19,999, or"  
8 = "8 $20,000 or more?" ;
```

VALUE W200146W

```
-7 = '-7 RF'  
-8 = '-8 DK'  
-1 = '-1 Inapplicable'  
-9 = '-9 Missing'  
1 = "1 NEARLY EVERY DAY"  
2 = "2 MORE THAN HALF THE DAYS"  
3 = "3 SEVERAL DAYS (LESS THAN HALF)"  
4 = "4 A FEW DAYS" ;
```

VALUE W200147W

```
-7 = '-7 RF'  
-8 = '-8 DK'  
-1 = '-1 Inapplicable'  
-9 = '-9 Missing'  
1 = "1 INCLUDED"  
2 = "2 EXTRA CHARGE" ;
```

VALUE W200148W

```
-7 = '-7 RF'  
-8 = '-8 DK'  
-1 = '-1 Inapplicable'  
-9 = '-9 Missing'  
1 = "1 Yes" ;
```

VALUE F200006W

```
-7 = '-7 RF'  
-8 = '-8 DK'  
-1 = '-1 Inapplicable'  
-9 = '-9 Missing'  
1 = "1 FREE STANDING NURSING HOME"  
2 = "2 FREE STANDING ASSISTED LIVING FACILITY"  
3 = "3 NURSING HOME AND ASSISTED LIVING FACILITY"  
4 = "4 CONTINUING CARE RETIREMENT COMMUNITY (CCRC)"  
5 = "5 ADULT FAMILY CARE HOME"  
6 = "6 GROUP HOME"  
7 = "7 BOARD AND CARE HOME"  
8 = "8 RETIREMENT COMMUNITY OR SENIOR HOUSING (NOT CCRC)"  
91 = "91 OTHER (SPECIFY)" ;
```

VALUE F200007W

```
-7 = '-7 RF'  
-8 = '-8 DK'  
-1 = '-1 Inapplicable'  
-9 = '-9 Missing'  
1 = "1 YES"  
2 = "2 NO" ;
```

VALUE F200008W

```
-7 = '-7 RF'  
-8 = '-8 DK'
```

## SAS ALGORITHM FOR DEMENTIA

```
-1 = '-1 Inapplicable'  
-9 = '-9 Missing'  
1 = "1 INDEPENDENT LIVING"  
2 = "2 ASSISTED LIVING"  
3 = "3 SPECIAL CARE, MEMORY CARE, OR ALZHEIMER'S UNIT"  
4 = "4 NURSING HOME"  
91 = "91 OTHER (SPECIFY)" ;
```

```
VALUE F200009W
```

```
-7 = '-7 RF'  
-8 = '-8 DK'  
-1 = '-1 Inapplicable'  
-9 = '-9 Missing'  
1 = "1 ASSISTED LIVING"  
2 = "2 NURSING HOME" ;
```

```
VALUE F200011W
```

```
-7 = '-7 RF'  
-8 = '-8 DK'  
-1 = '-1 Inapplicable'  
-9 = '-9 Missing'  
1 = "1 YES, SERVICE PROVIDED AS PART OF PACKAGE"  
2 = "2 YES, SERVICE PROVIDED AT AN EXTRA CHARGE"  
3 = "3 NO, SERVICE NOT PROVIDED" ;
```

```
VALUE F200012W
```

```
-7 = '-7 RF'  
-8 = '-8 DK'  
-1 = '-1 Inapplicable'  
-9 = '-9 Missing'  
1 = "1 SP/FAMILY"  
2 = "2 SOCIAL SECURITY/SSI"  
3 = "3 MEDICAID"  
4 = "4 MEDICARE"  
5 = "5 OTHER SOURCE" ;
```

```
VALUE I200002W
```

```
-7 = '-7 RF'  
-8 = '-8 DK'  
-1 = '-1 Inapplicable'  
-9 = '-9 Missing'  
1 = "1 Yes"  
2 = "2 No" ;
```

```
VALUE I200003W
```

```
-7 = '-7 RF'  
-8 = '-8 DK'  
-1 = '-1 Inapplicable'  
-9 = '-9 Missing'  
1 = "1 English"  
2 = "2 Spanish"  
3 = "3 Other (specify)" ;
```

```
VALUE I200005W
```

```
-7 = '-7 RF'  
-8 = '-8 DK'  
-1 = '-1 Inapplicable'
```

## SAS ALGORITHM FOR DEMENTIA

```
-9 = '-9 Missing'  
1 = "1 Friendly and interested"  
2 = "2 Cooperative but not particularly interested"  
3 = "3 Impatient and restless"  
4 = "4 Hostile" ;
```

```
VALUE I200006W
```

```
-7 = '-7 RF'  
-8 = '-8 DK'  
-1 = '-1 Inapplicable'  
-9 = '-9 Missing'  
1 = "1 Good"  
2 = "2 Fair"  
3 = "3 Poor" ;
```

```
VALUE I200008W
```

```
-7 = '-7 RF'  
-8 = '-8 DK'  
-1 = '-1 Inapplicable'  
-9 = '-9 Missing'  
1 = "1 All of the time"  
2 = "2 Most of the time"  
3 = "3 Some of the time"  
4 = "4 Only for the cognition and/or performance parts"  
5 = "5 None of the time" ;
```

```
VALUE I200010W
```

```
-7 = '-7 RF'  
-8 = '-8 DK'  
-1 = '-1 Inapplicable'  
-9 = '-9 Missing'  
1 = "1 Yes"  
2 = "2 No"  
3 = "3 Interview was conducted by telephone" ;
```

```
VALUE I200012W
```

```
-7 = '-7 RF'  
-8 = '-8 DK'  
-1 = '-1 Inapplicable'  
-9 = '-9 Missing'  
1 = "1 Yes"  
2 = "2 No"  
3 = "3 Not Administered" ;
```

```
VALUE I200013W
```

```
-7 = '-7 RF'  
-8 = '-8 DK'  
-1 = '-1 Inapplicable'  
-9 = '-9 Missing'  
1 = "1 Yes"  
2 = "2 No" ;
```

```
VALUE I200016W
```

```
-7 = '-7 RF'  
-8 = '-8 DK'  
-1 = '-1 Inapplicable'  
-9 = '-9 Missing'
```

## SAS ALGORITHM FOR DEMENTIA

```
1 = "1 Yes"  
2 = "2 No"  
3 = "3 Entire interview conducted by telephone" ;
```

```
VALUE I200017W  
-7 = '-7 RF'  
-8 = '-8 DK'  
-1 = '-1 Inapplicable'  
-9 = '-9 Missing'  
1 = "1 Not at all cluttered"  
2 = "2 Somewhat cluttered"  
3 = "3 Very cluttered"  
4 = "4 Could not see other rooms" ;
```

```
VALUE I200018W  
-7 = '-7 RF'  
-8 = '-8 DK'  
-1 = '-1 Inapplicable'  
-9 = '-9 Missing'  
1 = "1 None"  
2 = "2 A little"  
3 = "3 Some"  
4 = "4 A lot"  
5 = "5 Could not observe" ;
```

```
VALUE I200019W  
-7 = '-7 RF'  
-8 = '-8 DK'  
-1 = '-1 Inapplicable'  
-9 = '-9 Missing'  
1 = "1 Yes"  
2 = "2 No"  
7 = "7 Could not observe" ;
```

```
/* DERIVED VARIABLE FORMATS */
```

```
VALUE LVGARRG  
1 = '1 Alone'  
2 = '2 With spouse/partner only (spouse/partner in household)'  
3 = '3 With spouse/partner and with others'  
4 = '4 With others only'  
-1 = '-1 Inapplicable'  
-9 = '-9 Missing';
```

```
VALUE DOUTSFDF  
8 = '8 Not done in last month'  
1 = '1 Did not do by self in last month'  
2 = '2 Did by self in last month/No Difficulty'  
3 = '3 Did by self in last month/Difficulty'  
4 = '4 DKRF Did by self in last month/No Difficulty'  
5 = '5 DKRF Did by self in last month/Difficulty'  
6 = '6 Did by self in last month/DKRF Difficulty'  
7 = '7 DKRF Did by self in last month/DKRF Difficulty'  
-1 = '-1 Inapplicable'  
-9 = '-9 Missing';
```

```
VALUE DOUTDEVI
```

## SAS ALGORITHM FOR DEMENTIA

```
8 = '8 Not done in last month'  
1 = '1 No use of devices to go outside in last month'  
2 = '2 Use of devices to go outside in last month'  
3 = '3 DKRF If used devices to go outside in last month'  
4 = '4 DKRF If used devices in last month'  
-1 = '-1 Inapplicable'  
-9 = '-9 Missing';
```

### VALUE DOUTHELP

```
8 = '8 Not done in last month'  
1 = '1 No help to go outside in last month'  
2 = '2 Had help to go outside in last month'  
3 = '3 DKRF If had help to go outside in last month'  
-1 = '-1 Inapplicable'  
-9 = '-9 Missing';
```

### VALUE DINSDFSFD

```
8 = '8 Not done in last month'  
1 = '1 Did not do by self in last month'  
2 = '2 Did by self in last month/No Difficulty'  
3 = '3 Did by self in last month/Difficulty'  
4 = '4 DKRF Did by self in last month/No Difficulty'  
5 = '5 DKRF Did by self in last month/Difficulty'  
6 = '6 Did by self in last month/DKRF Difficulty'  
7 = '7 DKRF Did by self in last month/DKRF Difficulty'  
-1 = '-1 Inapplicable'  
-9 = '-9 Missing';
```

### VALUE DINSDDDEV

```
8 = '8 Not done in last month'  
1 = '1 No use of devices inside in last month'  
2 = '2 Use of devices inside in last month'  
3 = '3 DKRF If used devices inside in last month'  
4 = '4 DKRF On use of devices'  
-1 = '-1 Inapplicable'  
-9 = '-9 Missing';
```

### VALUE dinsdhlp

```
8 = '8 Not done in last month'  
1 = '1 No help to go around inside in last month'  
2 = '2 Had help to go around inside in last month'  
3 = '3 DKRF If had help to go around inside in last month'  
-1 = '-1 Inapplicable'  
-9 = '-9 Missing';
```

### VALUE dbedsdfd

```
1 = '1 Did not do by self in last month'  
2 = '2 Did by self in last month/No Difficulty'  
3 = '3 Did by self in last month/Difficulty'  
4 = '4 DKRF Did by self in last month/No Difficulty'  
5 = '5 DKRF Did by self in last month/Difficulty'  
6 = '6 Did by self in last month/DKRF Difficulty'  
7 = '7 DKRF Did by self in last month/DKRF Difficulty'  
-1 = '-1 Inapplicable'  
-9 = '-9 Missing';
```

### VALUE dbeddevi



## SAS ALGORITHM FOR DEMENTIA

```
1 = '1 No use of cane or walker to get out of bed in last month'  
2 = '2 Use of cane or walker to get out of bed in last month'  
3 = '3 DKRF If Used cane or walker to get out of bed in last month'  
4 = '4 DKRF If used cane or walker in last month'  
-1 = '-1 Inapplicable'  
-9 = '-9 Missing';
```

### VALUE dbedhelp

```
1 = '1 No help to get out of bed in last month'  
2 = '2 Had help to get out of bed in last month'  
3 = '3 DKRF If had help to get out of bed in last month'  
-1 = '-1 Inapplicable'  
-9 = '-9 Missing';
```

### VALUE dlaunbfd

```
1 = '1 Did not do by self in last month'  
2 = '2 Did by self in last month/No Difficulty'  
3 = '3 Did by self in last month/Difficulty'  
4 = '4 DKRF Did by self in last month/No Difficulty'  
5 = '5 DKRF Did by self in last month/Difficulty'  
6 = '6 Did by self in last month/DKRF Difficulty'  
7 = '7 DKRF Did by self in last month/DKRF Difficulty'  
8 = '8 Not done in last month'  
-1 = '-1 Inapplicable'  
-9 = '-9 Missing';
```

### VALUE dlaunrea

```
1= '1 Health/functioning reason only'  
2= '2 Other reason only'  
3= '3 Both health/functioning and other'  
4= '4 Service/someone from the place SP lives'  
-7 = '-7 RF'  
-8 = '-8 DK'  
-1 = '-1 Inapplicable'  
-9 = '-9 Missing';
```

### VALUE dshopsfd

```
1 = '1 Did not do by self in last month'  
2 = '2 Did by self in last month/No Difficulty'  
3 = '3 Did by self in last month/Difficulty'  
4 = '4 DKRF Did by self in last month/No Difficulty'  
5 = '5 DKRF Did by self in last month/Difficulty'  
6 = '6 Did by self in last month/DKRF Difficulty'  
7 = '7 DKRF Did by self in last month/DKRF Difficulty'  
8 = '8 Not done in last month'  
-1 = '-1 Inapplicable'  
-9 = '-9 Missing';
```

### VALUE dshoprea

```
1= '1 Health/functioning reason only'  
2= '2 Other reason only'  
3= '3 Both health/functioning and other'  
4= '4 Service/someone from the place SP lives'  
-7 = '-7 RF'
```

## SAS ALGORITHM FOR DEMENTIA

```
-8 = '-8 DK'  
-1 = '-1 Inapplicable'  
-9 = '-9 Missing';
```

### VALUE dmealsfd

```
1 = '1 Did not do by self in last month'  
2 = '2 Did by self in last month/No Difficulty'  
3 = '3 Did by self in last month/Difficulty'  
4 = '4 DKRF Did by self in last month/No Difficulty'  
5 = '5 DKRF Did by self in last month/Difficulty'  
6 = '6 Did by self in last month/DKRF Difficulty'  
7 = '7 DKRF Did by self in last month/DKRF Difficulty'  
8 = '8 Not done in last month'  
-1 = '-1 Inapplicable'  
-9 = '-9 Missing';
```

### VALUE dmealrea

```
1= '1 Health/functioning reason only'  
2= '2 Other reason only'  
3= '3 Both health/functioning and other'  
4= '4 Service/someone from the place SP lives'  
-7 = '-7 RF'  
-8 = '-8 DK'  
-1 = '-1 Inapplicable'  
-9 = '-9 Missing';
```

### VALUE dbanksfd

```
1 = '1 Did not do by self in last month'  
2 = '2 Did by self in last month/No Difficulty'  
3 = '3 Did by self in last month/Difficulty'  
4 = '4 DKRF Did by self in last month/No Difficulty'  
5 = '5 DKRF Did by self in last month/Difficulty'  
6 = '6 Did by self in last month/DKRF Difficulty'  
7 = '7 DKRF Did by self in last month/DKRF Difficulty'  
8 = '8 Not done in last month'  
-7 = '-7 RF'  
-8 = '-8 DK'  
-1 = '-1 Inapplicable'  
-9 = '-9 Missing';
```

### VALUE dbankrea

```
1= '1 Health/functioning reason only'  
2= '2 Other reason only'  
3= '3 Both health/functioning and other'  
4= '4 Service/someone from the place SP lives'  
-7 = '-7 RF'  
-8 = '-8 DK'  
-1 = '-1 Inapplicable'  
-9 = '-9 Missing';
```

### VALUE deatdevi

```
1 = '1 No use of adapted utensils in last month'  
2 = '2 Use of adapted utensils in last month'  
8 = '8 Not done in last month'  
3 = '3 DKRF If used adapted utensils in last month'  
-1 = '-1 Inapplicable'  
-9 = '-9 Missing';
```

## SAS ALGORITHM FOR DEMENTIA

```
VALUE deathelp
  1 = '1 No help eating in last month'
  2 = '2 Had help eating in last month'
  3 = '3 DKRF If had help eating in last month'
  8 = '8 Not done in last month'
 -1 = '-1 Inapplicable'
 -9 = '-9 Missing';

VALUE deatsfdf
  1 = '1 Did not do by self in last month'
  2 = '2 No Difficulty by self (and when using utensils)'
  3 = '3 Difficulty by self (and when using utensils)'
  6 = '6 Did by self in last month/DKRF Difficulty'
  7 = '7 DKRF Did by self in last month/DKRF Difficulty'
  8 = '8 Not done in last month'
 -1 = '-1 Inapplicable'
 -9 = '-9 Missing';

VALUE dbathdev
  1 = '1 No use of grab bars or bath seats in last month'
  2 = '2 Use of grab bars or bath seats in last month'
  3 = '3 DKRF If use of grab bars or bath seats in last month'
  4 = '4 DKRF If had grab bars or bath seats in last month'
  9 = '9 No bars/seats/shower/tub or washes up other way'
 -1 = '-1 Inapplicable'
 -9 = '-9 Missing';

VALUE dbathhel
  1 = '1 No help bathing in last month'
  2 = '2 Had help bathing in last month'
  3 = '3 DKRF If had help bathing in last month'
 -1 = '-1 Inapplicable'
 -9 = '-9 Missing';

VALUE dbathsfd
  1 = '1 Did not do by self in last month'
  2 = '2 No Difficulty by self (and when using grab bars or tub seat)'
  3 = '3 Difficulty by self (and when using grab bars or tub seat)'
  6 = '6 Did by self in last month/DKRF Difficulty'
  7 = '7 DKRF Did by self in last month/DKRF Difficulty'
 -1 = '-1 Inapplicable'
 -9 = '-9 Missing';

VALUE dtoildev
  1 = '1 No use of toileting devices in last month'
  2 = '2 Use of toileting devices in last month'
  3 = '3 DKRF of some and no use of other toileting devices in last month'
 -1 = '-1 Inapplicable'
 -9 = '-9 Missing';

VALUE dtoilhel
  1 = '1 No help toileting in last month'
  2 = '2 Had help toileting in last month'
  3 = '3 DKRF If had help toileting in last month'
 -1 = '-1 Inapplicable'
 -9 = '-9 Missing';
```

## SAS ALGORITHM FOR DEMENTIA

```
VALUE dtoolsfd
  1 = '1 Did not do by self in last month'
  2 = '2 No Difficulty by self (and when using toileting devices)'
  3 = '3 Difficulty by self (and when using toileting devices)'
  6 = '6 Did by self in last month/DKRF Difficulty'
  7 = '7 DKRF Did by self in last month/DKRF Difficulty'
  -1 = '-1 Inapplicable'
  -9 = '-9 Missing';

VALUE ddresdev
  8 = '8 Not done in last month'
  9 = '9 DKRF If dressed in last month'
  2 = '2 Use of dressing devices in last month'
  1 = '1 No use of dressing devices in last month'
  3 = '3 DKRF If use of dressing devices in last month'
  -1 = '-1 Inapplicable'
  -9 = '-9 Missing';

VALUE ddreshel
  8 = '8 Not done in last month'
  9 = '9 DKRF If dressed in last month'
  1 = '1 No help dressing in last month'
  2 = '2 Had help dressing in last month'
  3 = '3 DKRF If had help dressing in last month'
  -1 = '-1 Inapplicable'
  -9 = '-9 Missing';

VALUE ddressfd
  1 = '1 Did not do by self in last month'
  2 = '2 No Difficulty by self (and when using dressing devices)'
  3 = '3 Difficulty by self (and when using dressing devices)'
  6 = '6 Did by self in last month/DKRF Difficulty'
  7 = '7 DKRF Did by self in last month/DKRF Difficulty'
  8 = '8 Not done in last month'
  -1 = '-1 Inapplicable'
  -9 = '-9 Missing';

VALUE dmedssfd
  1 = '1 Did not do by self in last month'
  2 = '2 Did by self in last month/No Difficulty'
  3 = '3 Did by self in last month/Difficulty'
  4 = '4 DKRF Did by self in last month/No Difficulty'
  5 = '5 DKRF Did by self in last month/Difficulty'
  6 = '6 Did by self in last month/DKRF Difficulty'
  7 = '7 DKRF Did by self in last month/DKRF Difficulty'
  8 = '8 Not done in last month'
  9 = '9 No or DKRF if medications taken in last month'
  -1 = '-1 Inapplicable'
  -9 = '-9 Missing';

VALUE dmedsrea
  1 = '1 Health/functioning reason only'
  2 = '2 Other reason only'
  3 = '3 Both heath/functioning and other'
  4 = '4 Service/someone from the place SP lives'
  -7 = '-7 RF'
  -8 = '-8 DK'
```

## SAS ALGORITHM FOR DEMENTIA

```
-1 = '-1 Inapplicable'
-9 = '-9 Missing';

VALUE dmarstat
  1 = '1 Married'
  2 = '2 Living with a partner'
  3 = '3 Separated'
  4 = '4 Divorced'
  5 = '5 Widowed'
  6 = '6 Never married'
  -7 = '-7 RF'
  -8 = '-8 DK'
  -1 = '-1 Inapplicable'
  -9 = '-9 Missing';
VALUE DSPSAGEC
  -7 = '-7 RF'
  -8 = '-8 DK'
  -1 = '-1 Inapplicable'
  -9 = '-9 Missing'
  1 = " 1 UNDER 50"
  2 = " 2 50-54"
  3 = " 3 55-59"
  4 = " 4 60-64"
  5 = " 5 65-69"
  6 = " 6 70-74"
  7 = " 7 75-79"
  8 = " 8 80-84"
  9 = " 9 85-89"
  10 = "10 90 +" ;

VALUE dresid
  -1 = '-1 Inapplicable'
  1 = '1 Community '
  2 = '2 Residential Care Resident not nursing home (SP interview
complete)'
  3 = '3 Residential Care Resident not nursing home (FQ only)'
  4 = '4 Nursing Home Resident';
VALUE f_dresid
  -1 = '-1 Inapplicable'
  1 = '1 Community '
  2 = '2 Residential care not nursing home (SP interview)'
  3 = '3 Residential care not nursing home (FQ only)'
  4 = '4 Nursing home (SP interview)'
  5 = '5 Nursing home (FQ only)'
  6 = '6 Deceased'
  7 = '7 Residential care not nursing home in R1 and R5 (FQ only)'
  8 = '8 Nursing home in R1 and R5 (FQ only)' ;
VALUE f2dresid
  -1='-1 Inapplicable'
  1 = '1 Community '
  2 = '2 Residential care not nursing home (SP interview)'
  3 = '3 Residential care not nursing home (FQ only)'
  4 = '4 Nursing home (SP interview)'
  5 = '5 Nursing home (FQ only)'
  6 = '6 Deceased'
  7 = '7 Residential care not nursing home in R1 and R2 (FQ only)'
  8 = '8 Nursing home in R1 and R2 (FQ only)' ;
```

## SAS ALGORITHM FOR DEMENTIA

```
VALUE f3dresid
  -1='-1 Inapplicable'
  1 = '1 Community '
  2 = '2 Residential care not nursing home (SP interview) '
  3 = '3 Residential care not nursing home (FQ only) '
  4 = '4 Nursing home (SP interview) '
  5 = '5 Nursing home (FQ only) '
  6 = '6 Deceased'
  7 = '7 Residential care not nursing home in R1 and R3 (FQ only) '
  8 = '8 Nursing home in R1 and R3 (FQ only) ' ;

VALUE f4dresid
  -1='-1 Inapplicable'
  1 = '1 Community '
  2 = '2 Residential care not nursing home (SP interview) '
  3 = '3 Residential care not nursing home (FQ only) '
  4 = '4 Nursing home (SP interview) '
  5 = '5 Nursing home (FQ only) '
  6 = '6 Deceased'
  7 = '7 Residential care not nursing home in R1 and R4 (FQ only) '
  8 = '8 Nursing home in R1 and R4 (FQ only) ' ;
```

```
VALUE QUARTILE
-9="-9 Missing"
-1="-1 Inapplicable";
```

```
VALUE SPPB
-9="-9 Missing"
-1="-1 Inapplicable";
```

```
VALUE DCLCKSC
  0 = "0 Not recognizable as a clock"
  1 = "1 Severely distorted depiction of a clock"
  2 = "2 Moderately distorted depiction of a clock"
  3 = "3 Mildly distorted depiction of a clock"
  4 = "4 Reasonably accurate depiction of a clock"
  5 = "5 Accurate depiction of a clock (circular or square)"
-7 = "-7 SP refused to draw clock"
-8 = "-8 DK"
-1 = "-1 Inapplicable"
-2 = "-2 Proxy says cannot ask SP"
-3 = "-3 Proxy says can ask SP but SP unable to answer"
-4 = "-4 SP did not attempt to draw clock"
-9 = "-9 Missing";
```

```
VALUE DCLCKCL
  1 = '1 Very clear'
  2 = '2 Somewhat clear'
  3 = '3 Somewhat unclear'
  4 = '4 Very unclear'
  5 = '5 Blank'
-7 = '-7 SP refused to draw clock'
-8 = '-8 DK'
-1 = '-1 Inapplicable'
-2 = '-2 Proxy says cannot ask SP'
-3 = '-3 Proxy says can ask SP but SP unable to answer'
-4 = '-4 SP did not attempt to draw clock'
```

## SAS ALGORITHM FOR DEMENTIA

```
-9 = '-9 Missing';
```

### VALUE RESULT

```
-9='-9: MISSING'  
1='1: COMPLETED W RESULTS'  
2='2: COMPLETED MISSING RESULTS'  
3='3: ATTEMPTED W RESULTS'  
4='4: ATTEMPTED MISSING RESULTS'  
5='5: NOT ATTEMPTED SAFETY'  
6='6: NOT ATTEMPTED NOT SAFETY REASON'  
7='7: NO CHAIR/NO SPACE'  
9='9: NOT ATTEMPTED/MISSING';
```

### VALUE RESULT\_SCH

```
-9='-9: MISSING'  
1='1: COMPLETED W/OUT ARMS'  
2='2: COMPLETED W ARMS'  
3='3: ATTEMPTED W RESULTS'  
4='4: ATTEMPTED MISSING RESULTS'  
5='5: NOT ATTEMPTED SAFETY'  
6='6: NOT ATTEMPTED NOT SAFETY REASON'  
7='7: NO CHAIR/SAFETY REASON'  
8='8: NO CHAIR/NOT SAFETY REAS'  
9='9: NOT ATTEMPTED/MISSING'  
10='10: CH4=1 SINGLE CHAIR NOT COMPL';
```

### VALUE RESULT\_RCH

```
-9='-9: MISSING'  
1='1: COMPLETED W/OUT ARMS'  
2='2: COMPLETED MISSING RESULTS'  
3='3: ATTEMPTED W RESULTS'  
4='4: ATTEMPTED MISSING RESULTS'  
5='5: NOT ATTEMPTED SAFETY'  
6='6: NOT ATTEMPTED NOT SAFETY REASON'  
9='9: NO CHAIR OR NOT ATTEMPTED/MISSING';
```

### VALUE ZEROSCORE

```
1="1: NOT ELIGIBLE DUE TO EXCLUSION CRITERIA"  
2="2: NOT ATTEMPTED FOR SAFETY REASON"  
3="3: ATTEMPTED CHAIR STANDS/NOT ATTEMPTED FOR SAFETY"  
4="4: ATTEMPTED"  
5="5: NEW WALKING EXCLUSION"  
9="9: NOT ASSIGNED A ZERO SCORE";
```

### VALUE D\_LMLLOC

```
1 = '1 Community'  
2 = '2 Residential Care'  
-1 = '-1 Inapplicable'  
-9 = '-9 Missing';
```

### VALUE D\_LOCS

```
-7 = '-7 RF'  
-8 = '-8 DK'  
-1 = '-1 Inapplicable'  
-9 = '-9 Missing'  
1 = "1 Independent Living/Housing/Retirement"  
2 = "2 Assisted Living/Personal Care"
```

## SAS ALGORITHM FOR DEMENTIA

```
3 = "3 Special Care, Memory or Alzheimer's Unit"
4 = "4 Nursing Home"
8 = "8 Not Reported" ;

VALUE PA25FMT
-1 = '-1 Inapplicable'
-8 = '-8 DK'
-9 = '-9 Missing'
111= '111 Sleeping Napping'
131= '131 Eating'
132= '132 Going out to eat'
199= '199 Other self care activities'
211= '211 Work and work-related activities'
221= '221 Other income generating activities'
241= '241 Volunteering'
299= '299 Other productive activities'
321= '321 Shopping for non-durable goods'
399= '399 Other shopping'
411= '411 Food and drink preparation'
434= '434 Outdoor Maintenance'
439= '439 Household chores (cannot tell if indoor/outdoor)'
441= '441 Animal and pet care'
442= '442 Walking and exercising pets'
449= '449 Other animal and pet care'
451= '451 Vehicle maintenance and repair'
471= '471 Financial management'
499= '499 Other household activities'
511= '511 Physical care and assistance to others'
599= '599 Other physical care'
611= '611 Socializing with others in person'
612= '612 Socializing with others on the phone'
616= '616 Socializing and communicating on the computer'
621= '621 Watching TV and movies'
631= '631 Doing puzzles or games not on computer or online'
632= '632 Gambling not online or at a casino'
636= '636 Doing puzzles or games on a computer or online'
641= '641 Arts and crafts or hobbies'
642= '642 Reading'
643= '643 Writing'
644= '644 Listening to music'
646= '646 Computer or online leisure activities'
651= '651 Smoking or other tobacco use'
652= '652 Drinking alcohol'
661= '661 Doing nothing/relaxing'
669= '669 No activity'
699= '699 Other non active leisure'
711= '711 Playing sports'
712= '712 Walking or jogging'
713= '713 Other outdoor recreating activities'
714= '714 Attending sporting events'
715= '715 Other physical activity, exercise, yoga, swimming, working out,
dancing'
718= '718 Watching sporting events'
721= '721 Attending arts including plays and concerts'
723= '723 Attending movies'
724= '724 Attending casinos'
737= '737 Travel for leisure'
```



## SAS ALGORITHM FOR DEMENTIA

```
799= '799 Other active leisure'  
811= '811 Attending religious activities'  
812= '812 Other religious and spiritual activities'  
821= '821 Attending meetings or events'  
899= '899 Other organizational activity'  
991= '991 Other miscellaneous'  
992= '992 No favorite activity'  
997= '997 Refused'  
998= '998 Dont Know'  
999= '999 Not Codeable';  
  
      VALUE OCC_CODE  
1 = '1 Management Occupations: 0010-0430'  
2 = '2 Business and Financial Operations Occupations: 0500-0950'  
3 = '3 Computer and mathematical occupations: 1000-1240'  
4 = '4 Architecture and Engineering Occupations: 1300-1560'  
5 = '5 Life, Physical, and Social Science Occupations: 1600-1965'  
6 = '6 Community and Social Service Occupations: 2000-2060'  
7 = '7 Legal Occupations: 2100-2160'  
8 = '8 Education, Training, and Library Occupations: 2200-2550'  
9 = '9 Arts, Design, Entertainment, Sports, and Media Occupations: 2600-  
2960'  
10 = '10 Healthcare Practitioners and Technical Occupations: 3000-3540'  
11 = '11 Healthcare Support Occupations: 3600-3655'  
12 = '12 Protective Service Occupations: 3700-3955'  
13 = '13 Food Preparation and Serving Related Occupations: 4000-4160'  
14 = '14 Building and Grounds Cleaning and Maintenance Occupations: 4200-  
4250'  
15 = '15 Personal Care and Service Occupations: 4300-4650'  
16 = '16 Sales and Related Occupations: 4700-4965'  
17 = '17 Office and Administrative Support Occupations: 5000-5940'  
18 = '18 Farming, Fishing, and Forestry Occupations: 6000-6130'  
19 = '19 Construction and Extraction Occupations: 6200-6940'  
20 = '20 Installation, Maintenance, and Repair Occupations: 7000-7630'  
21 = '21 Production Occupations: 7700-8965'  
22 = '22 Transportation and Material Moving Occupations: 9000-9750'  
23 = '23 Military Specific Occupations: 9800-9830'  
24 = '24 No current occ (Unemployed, no work in the last 5 years, never  
worked): 9920'  
25 = '25 Blank field'  
26 = '26 Code did not match'  
94 = '94 Uncodable'  
95 = '95 Never Worked Entire Life'  
96 = '96 Homemaker/Raised Children'  
-7 = '-7 RF'  
-8 = '-8 DK'  
-1 = '-1 Inapplicable'  
-9 = '-9 Missing';  
  
      Value fl_Dfac  
1 = '1 Should have routed as facility but did not'  
2 = '2 Routed as facility but determined not facility resident'  
-1 = '-1 Inapplicable';  
VALUE PE_RSLT  
-9='-9 Missing'  
-1 = '-1 Inapplicable'  
1='1 Completed'
```

## SAS ALGORITHM FOR DEMENTIA

```
2='2 Attempted'
3='3 Not attempted' ;
VALUE dosfacd /* FOR FQ2dosfacd */
  -9= "-9 Missing"
  -8 = "-8 DK"
  -1 = "-1 INAPPLICABLE"
  1 = " 1 FREE STANDING NURSING HOME"
  2 = " 2 FREE STANDING ASSISTED LIVING FACILITY / RESIDENTIAL CARE
FACILITY"
  3 = " 3 NURSING HOME AND ASSISTED LIVING FACILITY"
  4 = " 4 CONTINUING CARE RETIREMENT COMMUNITY (CCRC)"
  5 = " 5 ADULT FAMILY CARE HOME"
  6 = " 6 GROUP HOME"
  7 = " 7 BOARD AND CARE HOME / PERSONAL CARE HOME"
  8 = " 8 RETIREMENT COMMUNITY OR SENIOR HOUSING (NOT CCRC)"
  9 = " 9 INDEPENDENT LIVING"
 10 = " 10 ASSISTED AND INDEPENDENT/RETIREMENT (NO NURSING HOME)"
 11 = " 11 HOUSING (APT, CONDO, ETC.)";
;
VALUE dosfaca /* FOR FQ2dosfaca */
  -9= "-9 Missing"
  -8 = "-8 DK"
  -1 = "-1 INAPPLICABLE"
  1 = " 1 INDEPENDENT LIVING / HOUSING / RETIREMENT "
  2 = " 2 ASSISTED LIVING / PERSONAL CARE"
  3 = " 3 SPECIAL CARE, MEMORY CARE, OR ALZHEIMER'S UNIT"
  4 = " 4 NURSING HOME" ;

VALUE INAP_YN
  1 = ' 1 Yes'
  2 = ' 2 No'
  -1 = '-1 Inapplicable' ;
VALUE CENDIV /* RE1DCENSDIV - Updated for R2 - Re-Release */
  1 = '1 Northeast Region: New England Division (ME, NH, VT, MA, RI, CT)'
  2 = '2 Northeast Region: Middle Atlantic Division (NY, NJ, PA)'
  3 = '3 Midwest Region: East North Central Division (OH, IN, IL, MI, WI)'
  4 = '4 Midwest Region: West North Central Division (MN, IA, MO, ND, SD,
NE, KS)'
  5 = '5 South Region: South Atlantic Division (DE, MD, DC, VA, WV, NC,
SC, GA, FL)'
  6 = '6 South Region: East South Central Division (KY, TN, AL, MS)'
  7 = '7 South Region: West South Central Division (AR, LA, OK, TX)'
  8 = '8 West Region: Mountain Division (MT, ID, WY, CO, NM, AZ, UT, NV)'
  9 = '9 West Region: Pacific Division (WA, OR, CA, AK, HI)'
  -9 = '-9 Missing';

VALUE W000002W
  -7 = '-7 RF'
  -8 = '-8 DK'
  -1 = '-1 Inapplicable'
  -9 = '-9 Missing'
  1 = "1 MALE"
  2 = "2 FEMALE" ;

VALUE W000005W
  1 = ' 1 Yes'
  2 = ' 2 No'
```

## SAS ALGORITHM FOR DEMENTIA

```
-7 = '-7 RF'  
-8 = '-8 DK'  
-1 = '-1 Inapplicable'  
-9 = '-9 Missing';
```

```
VALUE R1DRESID  
  -1 = '-1 Inapplicable'  
  1 = '1 Community '  
  2 = '2 Residential Care Resident not nursing home (SP interview  
complete)'  
  3 = '3 Residential Care Resident not nursing home (FQ only)'  
  4 = '4 Nursing Home Resident';
```

```
VALUE W200016W  
-7 = '-7 RF'  
-8 = '-8 DK'  
-1 = '-1 Inapplicable'  
-9 = '-9 Missing'  
 1 = "1 MEDICAID"  
 2 = "2 MEDICARE"  
 3 = "3 STATE PROGRAM"  
91 = "91 OTHER (SPECIFY)" ;
```

```
VALUE W200012W  
-7 = '-7 RF'  
-8 = '-8 DK'  
-1 = '-1 Inapplicable'  
-9 = '-9 Missing'  
 1 = "1 REGULAR"  
 2 = "2 VARIED" ;
```

```
VALUE W200061W  
-7 = '-7 RF'  
-8 = '-8 DK'  
-1 = '-1 Inapplicable'  
-9 = '-9 Missing'  
 1 = "1 SEPARATION OR DIVORCE"  
 2 = "2 DECEASED"  
 3 = "3 MOVED ELSEWHERE"  
 5 = "5 LAST INTERVIEW INFORMATION INCORRECT"  
 8 = "8 OTHER REASON" ;
```

```
VALUE d2hrsmth  
-13= '-13 Deceased '  
-12= '-12 Zero days/wk'  
-11= '-11 Hours missing'  
-10= '-10 Days missing'  
-9 = ' -9 Days and hrs missing'  
-1 = ' -1 Inapplicable'  
-7 = ' -7 RF'  
-8 = ' -8 DK'  
 0-<1 = '<1'  
 1-<10 = ' 1-<10 '  
10-<20 = '10-<20 '  
20-<30 = '20-<30 '  
30-<40 = '30-<40 '  
40-<60 = '40-<60 '
```

## SAS ALGORITHM FOR DEMENTIA

```
60-<120 ='60-<120'  
120-<180='120-<180'  
180-744='180-744 (24/7)'  
9999='9999 Not codeable, <1 hour/day' ;
```

```
VALUE dhrrsmth  
-11= '-11:hours missing'  
-10= '-10:days missing'  
-9 = '-9:days and hrs missing'  
-1 = '-1 Inapplicable'  
-7 = '-7 RF'  
-8 = '-8 DK'  
0-<1  = '<1'  
1-<10 = ' 1-<10'  
10-<20 = '10-<20'  
20-<30 = '20-<30'  
30-<40 = '30-<40'  
40-<60 = '40-<60'  
60-<120 = '60-<120'  
120-<180='120-<180'  
180-744='180-744 (24/7)'  
9999='9999 Not codeable, <1 hour/day' ;
```

```
Value dmissadd  
-1='-1 Inapplicable'  
1='1 no flags and added at CL section'  
2='2 no flags and added at DT section'  
3='3 no flags and added at EW section'  
4='4 no flags and added at HA section'  
5='5 no flags and added at HO section'  
6='6 no flags and added at MC section'  
7='7 no flags and added at MO section'  
8='8 no flags and added at PA section'  
9='9 no flags and added at PE section'  
10='10 no flags and added at SC section'  
11='11 no flags and added at SN section';
```

```
Value d2mssadd  
-1='-1 Inapplicable'  
0='0 no flags and added at undetermined section'  
1='1 no flags and added at CL section'  
2='2 no flags and added at DT section'  
3='3 no flags and added at EW section'  
4='4 no flags and added at HA section'  
5='5 no flags and added at HO section'  
6='6 no flags and added at MC section'  
7='7 no flags and added at MO section'  
8='8 no flags and added at PA section'  
9='9 no flags and added at PE section'  
10='10 no flags and added at SC section'  
11='11 no flags and added at SN section'  
12='12 no flags and added at CS section'  
13='13 no flags and added at HH section'  
14='14 no flags and added at IS section';
```

```
Value dopage3c  
-9='-9 Missing'
```

## SAS ALGORITHM FOR DEMENTIA

```
-8='-8 RF'  
-7='-7 DK'  
-1='-1 Inapplicable'  
1='1 UNDER 30'  
2='2 30-39'  
3='3 40-49'  
4='4 50-59'  
5='5 60-69'  
6='6 70-79'  
7='7 80-89'  
8='8 90 +';  
  
Value dopagect  
-9='-9 Missing'  
-8='-8 DK'  
-7='-7 RF'  
-1='-1 Inapplicable'  
1='1 UNDER 20'  
2='2 20-24'  
3='3 25-29'  
4='4 30-34'  
5='5 35-39'  
6='6 40-44'  
7='7 45-49'  
8='8 50-54'  
9='9 55-59'  
10='10 60-64'  
11='11 65-69'  
12='12 70-74'  
13='13 75-79'  
14='14 80-84'  
15='15 85-89'  
16='16 90 +';  
  
VALUE W200008W  
-7 = '-7 RF'  
-8 = '-8 DK'  
-1 = '-1 Inapplicable'  
-9 = '-9 Missing'  
1 = "1 UNDER 20"  
2 = "2 20-24"  
3 = "3 25-29"  
4 = "4 30-34"  
5 = "5 35-39"  
6 = "6 40-44"  
7 = "7 45-49"  
8 = "8 50-54"  
9 = "9 55-59"  
10 = "10 60-65"  
11 = "11 66-69"  
12 = "12 70-74"  
13 = "13 75-79"  
14 = "14 80-85"  
15 = "15 86-89"  
16 = "16 90-94"  
17 = "17 95-99"
```

## SAS ALGORITHM FOR DEMENTIA

```
18 = "18 100 +"
;
VALUE NumCigs
-7 = '-7 RF'
-8 = '-8 DK'
-1 = '-1 Inapplicable'
-9 = '-9 Missing'
999 = '999 SP smokes less than 1 cigarette / day';

VALUE dlmlint
1 = '1 Last month of life interview'
-1 = '-1 Inapplicable' ;

VALUE d2intvra
1 = '1 65 to 69'
2 = '2 70 to 74'
3 = '3 75 to 79'
4 = '4 80 to 84'
5 = '5 85 to 89'
6 = '6 90+'
-7 = '-7 RF'
-8 = '-8 DK'
-1 = '-1 Inapplicable'
-9 = '-9 Missing' ;

VALUE dad8dem
1 = '1 DEMENTIA RESPONSE TO ANY AD8 ITEMS IN PRIOR ROUNDS'
-1 = '-1 Inapplicable' ;

VALUE dwrdirre
1 = '1 Refused word recall task'
-1 = '-1 Inapplicable'
-9 = '-9 Missing' ;

VALUE dwrdirre
1 = '1 Refused word recall task'
-1 = '-1 Inapplicable'
-9 = '-9 Missing' ;

VALUE A0001AB
1 = "1 AM"
2 = "2 PM"
-1 = '-1 Inapplicable'
-9 = '-9 Missing';

VALUE A0002WA
1 = "1 Yes, there is space to set up the walking course"
2 = "2 No, there is not space to set up the walking course"
-1 = '-1 Inapplicable'
-9 = '-9 Missing';

VALUE A0004WA
1 = "1 None"
2 = "2 Cane"
3 = "3 Walker or rollator"
9 = "9 Other, specify"
```

## SAS ALGORITHM FOR DEMENTIA

```
-1 = '-1 Inapplicable'  
-7 = '-7 RF'  
-8 = '-8 DK'  
-9 = '-9 Missing';
```

```
VALUE A0004CH  
  1 = "1 No, chair stand not completed"  
  2 = "2 Yes, chair stand completed"  
 -1 = '-1 Inapplicable'  
 -9 = '-9 Missing';
```

```
VALUE A0008CH  
  1 = "1 With arms"  
  2 = "2 Without arms"  
 -1 = '-1 Inapplicable'  
 -9 = '-9 Missing';
```

```
VALUE A0014CH  
  1 = "1 1 Chair stand completed"  
  2 = "2 2 Chair stands completed"  
  3 = "3 3 Chair stands completed"  
  4 = "4 4 Chair stands completed"  
 -1 = '-1 Inapplicable'  
 -9 = '-9 Missing';
```

```
VALUE BA1SS  
  1 = '1 Eligible and recorded result for SxS Balance'  
  2 = '2 Eligible and no recorded result for SxS Balance'  
  4 = '4 Not Eligible due to exclusion criteria'  
 -1 = '-1 Inapplicable'  
 -9 = '-9 Missing';
```

```
VALUE BA1STAN  
  1 = '1 Eligible and recorded result for Semi Tandem Balance'  
  2 = '2 Eligible and no recorded result for Semi Tandem Balance'  
  3 = '3 Not administered because did not complete prior balance test'  
  4 = '4 Not Eligible due to exclusion criteria'  
 -1 = '-1 Inapplicable'  
 -9 = '-9 Missing';
```

```
VALUE BA1TAN  
  1 = '1 Eligible and recorded result for full tandem balance'  
  2 = '2 Eligible and no recorded result for full tandem balance'  
  3 = '3 Not administered because did not complete prior balance tests'  
  4 = '4 Not Eligible due to exclusion criteria'  
 -1 = '-1 Inapplicable'  
 -9 = '-9 Missing';
```

```
VALUE BA1OP  
  1 = '1 Eligible and recorded result for one leg eyes open balance'  
  2 = '2 Eligible and no recorded result for one leg eyes open balance'  
  3 = '3 Not administered because did not complete prior balance tests'  
  4 = '4 Not Eligible due to exclusion criteria'  
 -1 = '-1 Inapplicable'  
 -9 = '-9 Missing';
```

```
VALUE BA1CL
```

## SAS ALGORITHM FOR DEMENTIA

```
1 = '1 Eligible and recorded result for one leg eyes closed balance'  
2 = '2 Eligible and no recorded result for one leg eyes closed balance'  
3 = '3 Not administered because did not complete prior balance tests'  
4 = '4 Not Eligible due to exclusion criteria'  
-1 = '-1 Inapplicable'  
-9 = '-9 Missing';
```

### VALUE WA1WLK

```
1 = '1 Eligible and recorded result for walking course'  
2 = '2 Eligible and no recorded result for walking course'  
4 = '4 Not Eligible due to exclusion criteria'  
5 = '5 Not Eligible on exclusion criteria but recorded result (SP changed  
mind)'  
-1 = '-1 Inapplicable '  
-9 = '-9 Missing';
```

### VALUE CH1SCH

```
1 = '1 Eligible and recorded result for single chair stand'  
2 = '2 Eligible and no recorded result for single chair stand'  
4 = '4 Not Eligible due to exclusion criteria'  
-1 = '-1 Inapplicable'  
-9 = '-9 Missing';
```

### VALUE CH1RSH

```
1 = '1 Eligible and recorded result for repeated chair stand'  
2 = '2 Eligible and no recorded result for repeated chair stand'  
3 = '3 Not administered because did not complete single chair stand w/o  
arms'  
4 = '4 Not Eligible due to exclusion criteria'  
-1 = '-1 Inapplicable'  
-9 = '-9 Missing';
```

### VALUE GR1GRIP

```
1 = '1 Eligible and recorded result for grip strength'  
2 = '2 Eligible and no recorded result for grip strength'  
4 = '4 Not Eligible due to exclusion criteria'  
-1 = '-1 Inapplicable'  
-9 = '-9 Missing';
```

### VALUE WC1WAIST

```
1 = '1 Eligible and recorded result for waist circumference'  
2 = '2 Eligible and no recorded result for waist circumference'  
-1 = '-1 Inapplicable'  
-9 = '-9 Missing';
```

### VALUE PK1PEAK

```
1 = '1 Eligible and recorded result for peak air flow'  
2 = '2 Eligible and no recorded result for peak air flow'  
-1 = '-1 Inapplicable'  
-9 = '-9 Missing';
```

### VALUE RGT\_LFT

```
1 = '1 Right'  
2 = '2 Left'  
-1 = '-1 Inapplicable'  
-9 = '-9 Missing';
```



## SAS ALGORITHM FOR DEMENTIA

```
VALUE PERSON
  1 = '1 Interviewer'
  2 = '2 Sample person'
 -1 = '-1 Inapplicable'
 -9 = '-9 Missing';

VALUE STAND
  1 = '1 Standing'
  2 = '2 Sitting'
  3 = '3 Lying down'
 -1 = '-1 Inapplicable'
 -9 = '-9 Missing';

VALUE EFFORT
  1 = '1 Full effort'
  2 = '2 Less effort for health reason'
  3 = '3 Less effort for other reason'
 -1 = '-1 Inapplicable'
 -9 = '-9 Missing';

VALUE WORDREC
  1 = ' 1 LIST 1'
  2 = ' 2 LIST 2'
  3 = ' 3 LIST 3'
 -1 = '-1 Inapplicable '
 -9 = '-9 Missing';

VALUE WORDRE_N
 -1 = '-1 Inapplicable'
 -2 = '-2 Proxy says cannot ask SP'
 -3 = '-3 Proxy says can ask SP but SP unable to answer'
 -7 = '-7 SP refused activity'
 -9 = '-9 Missing';

      VALUE SP30051W
-7 = '-7 RF'
-8 = '-8 DK'
-1 = '-1 Inapplicable'
-9 = '-9 Missing'
 1 = "1 EXCELLENT"
 2 = "2 VERY GOOD"
 3 = "3 GOOD"
 4 = "4 FAIR"
 5 = "5 POOR"
 6 = "6 DOES NOT APPLY/NO CARE IN LAST MONTH OF LIFE"
;

VALUE SP3019aW
 -7 = '-7 RF'
-8 = '-8 DK'
-1 = '-1 Inapplicable'
-9 = '-9 Missing'
 1 = "1 JANUARY"
 2 = "2 FEBRUARY"
 3 = "3 MARCH"
 4 = "4 APRIL"
 5 = "5 MAY"
 6 = "6 JUNE"
 7 = "7 JULY"
```

## SAS ALGORITHM FOR DEMENTIA

```
8 = "8 AUGUST"
9 = "9 SEPTEMBER"
10 = "10 OCTOBER"
11 = "11 NOVEMBER"
12 = "12 DECEMBER"
90 = "90 LAST INTERVIEW INFORMATION INCORRECT"
;
VALUE RACEHISP
  1 = ' 1 White, non-hispanic'
  2 = ' 2 Black, non-hispanic'
  3 = ' 3 Other (Am Indian/Asian/Native Hawaiian/Pacific Islander/other
specify), non-Hispanic'
  4 = ' 4 Hispanic'
  5 = ' 5 More than one DKRF primary'
  6 = ' 6 DKRF'
  -9 = '-9 Missing';

VALUE SPPB_MIS
  -7 = '-7 RF'
-8 = '-8 DK'
-9 = '-9 Missing'
-1="-1 Inapplicable"
1="1 Proxy interview"
2="2 Missing walk and repeat chair and balance"
3="3 Missing walk and repeat chair"
4="4 Missing walk and balance"
5="5 Missing repeat chair and balance"
6="6 Missing walk"
7="7 Missing repeat chair"
8="8 Missing balance"
9="9 No space"
10="10 No chair"
11="11 No space walk and no chair"
12="12 No space walk and non-safety missing"
13="13 No chair and non-safety missing"
14="14 Non-safety walk"
15="15 Non-safety chair"
16="16 Non-safety balance"
17="17 Non-safety walk and chair"
18="18 Non-safety walk and balance"
19="19 Non-safety chair and balance"
20="20 Non-safety walk and chair and balance";

VALUE QUARTILES
-9="-9 Missing"
-1="-1 Inapplicable"
;
VALUE SP30025W
  -7 = '-7 RF'
  -8 = '-8 DK'
  -1 = '-1 Inapplicable'
  -9 = '-9 Missing'
  1 = "1 FREE-STANDING (DETACHED) SINGLE HOUSE"
  2 = "2 SINGLE HOUSE BUT ATTACHED TO OTHERS (ROW HOUSE, TOWNHOUSE, DUPLEX,
TRIPLEX, OR TRIPLE DECKER)"
  3 = "3 MOBILE HOME OR TRAILER"
  4 = "4 MULTI-UNIT (2+) BUILDING"
```

## SAS ALGORITHM FOR DEMENTIA

```

    91 = "91 OTHER (SPECIFY)"
;
    VALUE SP30046W
        -7 = '-7 RF'
    -8 = '-8 DK'
    -1 = '-1 Inapplicable'
    -9 = '-9 Missing'
    1 = "1 AT SP'S HOME"
    2 = "2 IN A HOSPITAL"
    3 = "3 IN A NURSING HOME"
    4 = "4 IN A HOSPICE RESIDENCE"
    5 = "5 AT SOMEONE ELSE'S HOME"
    91 = "91 SOMEWHERE ELSE (SPECIFY)"
;
    VALUE SP30076W
        -7 = '-7 RF'
    -8 = '-8 DK'
    -1 = '-1 Inapplicable'
    -9 = '-9 Missing'
    1 = "1 YES"
    2 = "2 NO"
    7 = "7 YES, DOESNT KNOW HOW TO USE"
;
    VALUE W300151W
        -7 = '-7 RF'
        -8 = '-8 DK'
        -1 = '-1 Inapplicable'
        -9 = '-9 Missing'
    1 = "1 VERY GOOD"
    2 = "2 GOOD"
    3 = "3 FAIR"
    4 = "4 POOR"
    5 = "5 VERY POOR" ;

    VALUE SP30076H
        -7 = '-7 RF'
        -8 = '-8 DK'
        -1 = '-1 Inapplicable'
        -9 = '-9 Missing'
    95 = "95 NO USUAL NUMBER OF HOURS OR DIFFERENT FROM DAY TO DAY" ;
    VALUE SP30076G
        -7 = '-7 RF'
        -8 = '-8 DK'
        -1 = '-1 Inapplicable'
        -9 = '-9 Missing'
    95 = "95 NO USUAL TIME OR DIFFERENT FROM DAY TO DAY" ;
    VALUE SP30076I
        -7 = '-7 RF'
        -8 = '-8 DK'
        -1 = '-1 Inapplicable'
        -9 = '-9 Missing'
    95 = "95 NO USUAL NUMBER OF HOURS OR DIFFERENT FROM NIGHT TO NIGHT"
;
    VALUE SP30076J
        -7 = '-7 RF'
        -8 = '-8 DK'
        -1 = '-1 Inapplicable'

```

## SAS ALGORITHM FOR DEMENTIA

```

    -9 = '-9 Missing'
    95 = "95 NO USUAL TIME OR DIFFERENT FROM NIGHT TO NIGHT" ;
    VALUE SP30076K
    -7 = '-7 RF'
    -8 = '-8 DK'
    -1 = '-1 Inapplicable'
    -9 = '-9 Missing'
    0 = "0 LESS THAN AN HOUR"
    90 = "90 FELL ASLEEP RIGHT AWAY"
    95 = "95 NO USUAL AMOUNT OF TIME TO FALL ASLEEP OR DIFFERENT FROM
NIGHT TO NIGHT" ;
    VALUE SP30155W
    -7 = '-7 RF'
    -8 = '-8 DK'
    -1 = '-1 Inapplicable'
    -9 = '-9 Missing'
    1 = "1 NAPS PLANNED"
    2 = "2 FELL ASLEEP WITHOUT MEANING TO"
    3 = "3 BOTH (SOME PLANNED/SOME NOT)" ;
    VALUE SP30120W
    -7 = '-7 RF'
    -8 = '-8 DK'
    -1 = '-1 Inapplicable'
    -9 = '-9 Missing'
    1 = "1 OFTEN"
    2 = "2 SOMETIMES"
    3 = "3 RARELY"
    4 = "4 NEVER" ;
Value HOURSF
-13='-13 SP deceased/section not administered'
-12='-12 Valid skip/staff'
-11='-11 Hours missing'
-10='-10 Days missing'
-9='-9 Days and hrs missing'
-1='-1 Inapplicable'
0- 1='0-<1'
1.01- 10='1-<10'
10.01- 20='10-<20'
20.01- 30='20-<30'
30.01-40='30-<40'
40.01-60='40-<60'
60.01-120='60-<120'
120.01-180='120-<180'
180.01-744='180-744 (24/7)'
9999='9999 Not codeable, <1 hour/day';
    VALUE SP30120W
    -7 = '-7 RF'
    -8 = '-8 DK'
    -1 = '-1 Inapplicable'
    -9 = '-9 Missing'
    1 = "1 OFTEN"
    2 = "2 SOMETIMES"
    3 = "3 RARELY"
    4 = "4 NEVER"
;
    VALUE SP30118W
    -7 = '-7 RF'

```

## SAS ALGORITHM FOR DEMENTIA

```
-8 = '-8 DK'
-1 = '-1 Inapplicable'
-9 = '-9 Missing'
 1 = "1 A LOT"
 2 = "2 SOME"
 3 = "3 A LITTLE"
 4 = "4 NOT AT ALL" ;
VALUE SP30141W
-7 = '-7 RF'
-8 = '-8 DK'
-1 = '-1 Inapplicable'
-9 = '-9 Missing'
 1 = "less than $27,600,"
 2 = "$27,600-$41,999,"
 3 = "$42,000-$63,999,"
 4 = "$64,000-$107,999, or"
 5 = "$108,000 or more?" ;
VALUE SP30142W
-7 = '-7 RF'
-8 = '-8 DK'
-1 = '-1 Inapplicable'
-9 = '-9 Missing'
 1 = "less than $14,000,"
 2 = "$14,000-$21,999,"
 3 = "$22,000-$35,999,"
 4 = "$36,000-$48,999, or"
 5 = "$49,000 or more?" ;
VALUE INVENT
-7 = '-7 RF'
-8 = '-8 DK'
-1 = '-1 Inapplicable'
-9 = '-9 Missing'
 104="104-Arthritis"
 107="107-Lung Disease"
 109="109-Dementia or Alzheimer's disease"
 110="110-Cancer"
 113="113-Other serious disease, illness, health problem"
 114="114-Knee surgery/problem"
 115="115-Hip repair or replacement/problem"
 117="117-Back or Spine Surgery/problem"
 121="121-Sleep Problems"
 201="201-Hearing problems"
 202="202-Sight problems"
 205="205-Pain"
 301="301-Breathing problems"
 302="302-Upper body strength movement"
 303="303-Lower body strength movement"
 304="304-Low energy"
 305="305-Balance or coordination problems"
 306="306-Walking distances"
 307="307-Climbing stairs"
 308="308-Lifting and carrying items"
 309="309-Kneeling"
 310="310-Bending"
 311="311-Reaching"
 312="312-Opening Jars"
 313="313-Grasping"
```

## SAS ALGORITHM FOR DEMENTIA

```
401="401-Memory"
501="501-Getting out of bed"
502="502-Getting around inside"
503="503-Getting outside"
504="504-Travel/transportation"
601="601-Eating"
602="602-Washing"
603="603-Toileting"
604="604-Dressing"
605="605-Grooming"
701="701-Laundry"
702="702-Shopping"
703="703-Cooking"
705="705-Money matters"
706="706-Indoor cleaning and maintenance"
707="707-Outdoor cleaning and maintenance"
801="801-Medications"
802="802-Doctor visits"
804="804-Other medical self-care"
1211="1211-Working"
1442="1442-Walking/exercising pets"
1451="1451-Vehicle repair and maintenance"
1461="1461-Appliance tool, and toy use, set-up, repair, &
maintenance"
1462="1462-Computer use, set-up, repair, maintenance, and
education"
1473="1473-Household organization"
1512="1512-Looking after someone else"
1611="1611-Socializing and communicating with others-in person"
1612="1612-Socializing and communication with others by talking
on telephone"
1613="1613-Attending or hosting party, wedding or social
occasions"
1614="1614-Reading and sorting through the mail"
1621="1621-Watch television and movies"
1631="1631-Games & puzzles"
1641="1641-Arts and crafts, collecting, and hobbies, making
music"
1642="1642-Reading"
1643="1642-Writing (personal, not on computer)"
1644="1644-Listening to recorded music or radio"
1711="1711-Playing/practicing sports or taking physical activity
class/lessons"
1712="1712-Walking/jogging for exercise or pleasure or working
out"
1713="1713-Other outdoor recreation activities"
1813="1813-Religious & spiritual volunteer activities"
1901="1901-Other, no existing code"
1998="1998-Don't know"
1999="1999-Refused/blank";
VALUE W500058W
-7 = '-7 RF'
-8 = '-8 DK'
-1 = '-1 Inapplicable'
-9 = '-9 Missing'
1 = "1 MONTHS"
2 = "2 YEARS" ;
```

## SAS ALGORITHM FOR DEMENTIA

```
VALUE W500103W
  -7 = '-7 RF'
  -8 = '-8 DK'
  -1 = '-1 Inapplicable'
  -9 = '-9 Missing'
   1 = "1 YES, A YEAR OR MORE"
   2 = "2 NO, LESS THAN A YEAR" ;

VALUE W500105W
  -7 = '-7 RF'
  -8 = '-8 DK'
  -1 = '-1 Inapplicable'
  -9 = '-9 Missing'
   1 = "1 MONTH AND YEAR"
   2 = "2 NUMBER OF MONTHS AGO"
   3 = "3 NUMBER OF YEARS AGO"
   4 = "4 AGE WHEN LAST DROVE"
   7 = "7 NEVER DROVE" ;

VALUE W500123W
  -7 = '-7 RF'
  -8 = '-8 DK'
  -1 = '-1 Inapplicable'
  -9 = '-9 Missing'
   1 = "1 STILL FAVORITE ACTIVITY"
   2 = "2 HAS A NEW FAVORITE ACTIVITY"
  95 = "95 NO FAVORITE ACTIVITY" ;

VALUE W500124W
  -7 = '-7 RF'
  -8 = '-8 DK'
  -1 = '-1 Inapplicable'
  -9 = '-9 Missing'
   1 = "1 LESS THAN 1 MONTH"
   2 = "2 1 TO 3 MONTHS"
   3 = "3 4 TO 5 MONTHS"
   4 = "4 6 OR MORE MONTHS" ;

VALUE W500125W
  -7 = '-7 RF'
  -8 = '-8 DK'
  -1 = '-1 Inapplicable'
  -9 = '-9 Missing'
   1 = "1 LESS THAN 1 WEEK"
   2 = "2 1 TO 2 WEEKS"
   3 = "3 3 TO 4 WEEKS" ;

VALUE W500126W
  -7 = '-7 RF'
  -8 = '-8 DK'
  -1 = '-1 Inapplicable'
  -9 = '-9 Missing'
   1 = "1 A FRACTURE, SPRAIN, OR INJURY"
   2 = "2 A HIP, KNEE, OR OTHER JOINT REPLACEMENT"
   3 = "3 ANOTHER MUSCULOSKELETAL CONDITION"
   4 = "4 A STROKE OR TIA"
   5 = "5 A HEART ATTACK"
   6 = "6 ANOTHER HEART CONDITION OR VASCULAR DISEASE"
   7 = "7 A BREATHING CONDITION"
   8 = "8 A NEUROLOGICAL CONDITION LIKE MS OR PARKINSONS"
   9 = "9 CANCER"
  94 = "94 ANOTHER CONDITION (SPECIFY)"
```

## SAS ALGORITHM FOR DEMENTIA

```
    95 = "95 NO MEDICAL CONDITION (IF VOLUNTEERED)" ;
VALUE W500128W
-7 = '-7 RF'
-8 = '-8 DK'
-1 = '-1 Inapplicable'
-9 = '-9 Missing'
  1 = "1 DIFFICULTY CHEWING OR SWALLOWING"
  2 = "2 DIFFICULTY SPEAKING OR BEING UNDERSTOOD"
  3 = "3 PAIN LEVEL"
  4 = "4 PROBLEM WITH BREATHING"
  5 = "5 PROBLEM WITH STRENGTH (MUSCLE WEAKNESS)"
  6 = "6 PROBLEM WITH MOVEMENT (RANGE OF MOTION)"
  7 = "7 LOW ENERGY LEVEL"
  8 = "8 PROBLEM WITH BALANCE OR COORDINATION"
  9 = "9 PROBLEM WITH FALLS"
 10 = "10 PROBLEM WITH MEMORY"
 95 = "95 NONE OF THESE PROBLEMS" ;
VALUE W500131W
-7 = '-7 RF'
-8 = '-8 DK'
-1 = '-1 Inapplicable'
-9 = '-9 Missing'
  1 = "1 AS AN OVERNIGHT PATIENT IN A HOSPITAL, NURSING HOME OR REHAD
FACILITY"
  2 = "2 AT AN OUTPATIENT CENTER, CLINIC, DRs OR THERAPISTs OFFICE"
  3 = "3 HOME"
  4 = "4 SOMEWHERE ELSE" ;
VALUE W500132W
-7 = '-7 RF'
-8 = '-8 DK'
-1 = '-1 Inapplicable'
-9 = '-9 Missing'
  1 = "1 IMPROVED"
  2 = "2 GOT WORSE"
  3 = "3 STAYED ABOUT THE SAME"
  4 = "4 VARIED/UP AND DOWN (IF VOLUNTEERED)" ;
VALUE W500133W
-7 = '-7 RF'
-8 = '-8 DK'
-1 = '-1 Inapplicable'
-9 = '-9 Missing'
  1 = "1 A LOT"
  2 = "2 SOMEWHAT"
  3 = "3 A LITTLE" ;

VALUE W500137W
-7 = '-7 RF'
-8 = '-8 DK'
-1 = '-1 Inapplicable'
-9 = '-9 Missing'
  1 = "1 WELL OFF"
  2 = "2 ABOVE AVERAGE"
  3 = "3 AVERAGE"
  4 = "4 BELOW AVERAGE"
  5 = "5 POOR" ;
VALUE W500010W
-7 = '-7 RF'
```



## SAS ALGORITHM FOR DEMENTIA

```
-8 = '-8 DK'
-1 = '-1 Inapplicable'
-9 = '-9 Missing'
  1 = "1 MOTHER ONLY"
  2 = "2 FATHER ONLY"
  3 = "3 ANOTHER RELATIVE"
  4 = "4 NON-RELATIVES"
  5 = "5 VARIED/MOVED AROUND" ;
VALUE W500142W
-7 = '-7 RF'
-8 = '-8 DK'
-1 = '-1 Inapplicable'
-9 = '-9 Missing'
  1 = "1 VERY WELL"
  2 = "2 WELL"
  3 = "3 NOT WELL"
  4 = "4 NOT AT ALL" ;
VALUE W500147W
-7 = '-7 RF'
-8 = '-8 DK'
-1 = '-1 Inapplicable'
-9 = '-9 Missing'
  1 = "1 NUMBER OF YEARS"
  2 = "2 AGE" ;
VALUE W500150W
-7 = '-7 RF'
-8 = '-8 DK'
-1 = '-1 Inapplicable'
-9 = '-9 Missing'
  1 = "1 ENTER PAYCHECK AMOUNT"
  2 = "2 ENTER PAY PER HOUR"
  3 = "3 ENTER PAY PER DAY" ;
VALUE W500151W
-7 = '-7 RF'
-8 = '-8 DK'
-1 = '-1 Inapplicable'
-9 = '-9 Missing'
  1 = "1 ENTER OCCUPATION"
  2 = "2 NEVER WORKED ENTIRE LIFE"
  3 = "3 HOMEMAKER/RAISED CHILDREN/WORKED IN THE HOME" ;
VALUE W500152W
-7 = '-7 RF'
-8 = '-8 DK'
-1 = '-1 Inapplicable'
-9 = '-9 Missing'
  1 = "1 SAME KIND OF WORK"
  2 = "2 SOMETHING DIFFERENT" ;
VALUE W500160W
-7 = '-7 RF'
-8 = '-8 DK'
-1 = '-1 Inapplicable'
-9 = '-9 Missing'
  1 = "1 MAIL"
  2 = "2 DIRECT DEPOSIT"
  3 = "3 PREPAID CARD" ;
VALUE W500165W
-7 = '-7 RF'
```

## SAS ALGORITHM FOR DEMENTIA

```
-8 = '-8 DK'
-1 = '-1 Inapplicable'
-9 = '-9 Missing'
 1 = "1 ENTER COMBINED AMOUNT"
 2 = "2 ENTER SP AND SPOUSE/PARTNER AMOUNTS SEPARATELY" ;
VALUE W500166W
-7 = '-7 RF'
-8 = '-8 DK'
-1 = '-1 Inapplicable'
-9 = '-9 Missing'
 1 = "1 LESS THAN $1,300"
 2 = "2 $1,300 TO LESS THAN $1,700"
 3 = "3 $1,700 TO LESS THAN $2,200"
 4 = "4 $2,200 TO LESS THAN $2,600"
 5 = "5 $2,600 OR MORE" ;
VALUE W500167W
-7 = '-7 RF'
-8 = '-8 DK'
-1 = '-1 Inapplicable'
-9 = '-9 Missing'
 1 = "1 LESS THAN $700"
 2 = "2 $700 TO LESS THAN $1,000"
 3 = "3 $1,000 TO LESS THAN $1,300"
 4 = "4 $1,300 TO LESS THAN $1,600"
 5 = "5 $1,600 OR MORE" ;
VALUE W500168W
-7 = '-7 RF'
-8 = '-8 DK'
-1 = '-1 Inapplicable'
-9 = '-9 Missing'
 1 = "1 LESS THAN $300"
 2 = "2 $300 TO LESS THAN $700"
 3 = "3 $700 TO LESS THAN $1,000"
 4 = "4 $1,000 OR MORE" ;
VALUE W500169W
-7 = '-7 RF'
-8 = '-8 DK'
-1 = '-1 Inapplicable'
-9 = '-9 Missing'
 1 = "1 LESS THAN $100"
 2 = "2 $100 TO LESS THAN $200"
 3 = "3 $200 TO LESS THAN $400"
 4 = "4 $400 TO LESS THAN $700"
 5 = "5 $700 OR MORE" ;
VALUE W500170W
-7 = '-7 RF'
-8 = '-8 DK'
-1 = '-1 Inapplicable'
-9 = '-9 Missing'
 1 = "1 LESS THAN $1,000"
 2 = "2 $1,000 TO LESS THAN $1,400"
 3 = "3 $1,400 TO LESS THAN $1,800"
 4 = "4 $1,800 TO LESS THAN $2,200"
 5 = "5 $2,200 OR MORE" ;
VALUE W500171W
-7 = '-7 RF'
-8 = '-8 DK'
```

## SAS ALGORITHM FOR DEMENTIA

```
-1 = '-1 Inapplicable'  
-9 = '-9 Missing'  
1 = "1 LESS THAN $500"  
2 = "2 $500 TO LESS THAN $700"  
3 = "3 $700 TO LESS THAN $900"  
4 = "4 $900 TO LESS THAN $1,100"  
5 = "5 $1,100 OR MORE" ;  
VALUE W500172W  
-7 = '-7 RF'  
-8 = '-8 DK'  
-1 = '-1 Inapplicable'  
-9 = '-9 Missing'  
1 = "1 LESS THAN $600"  
2 = "2 $600 TO LESS THAN $1,300"  
3 = "3 $1,300 TO LESS THAN $2,100"  
4 = "4 $2,100 TO LESS THAN $5,900"  
5 = "5 $5,900 OR MORE" ;  
VALUE W500173W  
-7 = '-7 RF'  
-8 = '-8 DK'  
-1 = '-1 Inapplicable'  
-9 = '-9 Missing'  
1 = "1 LESS THAN $400"  
2 = "2 $400 TO LESS THAN $900"  
3 = "3 $900 TO LESS THAN $1,600"  
4 = "4 $1,600 TO LESS THAN $3,800"  
5 = "5 $3,800 OR MORE" ;  
VALUE W500174W  
-7 = '-7 RF'  
-8 = '-8 DK'  
-1 = '-1 Inapplicable'  
-9 = '-9 Missing'  
1 = "1 LESS THAN $34,000"  
2 = "2 $34,000 TO LESS THAN $82,000"  
3 = "3 $82,000 TO LESS THAN $175,000"  
4 = "4 $175,000 TO LESS THAN $413,000"  
5 = "5 $413,000 OR MORE" ;  
VALUE W500175W  
-7 = '-7 RF'  
-8 = '-8 DK'  
-1 = '-1 Inapplicable'  
-9 = '-9 Missing'  
1 = "1 LESS THAN $20,000"  
2 = "2 $20,000 TO LESS THAN $47,000"  
3 = "3 $47,000 TO LESS THAN $92,000"  
4 = "4 $92,000 TO LESS THAN $218,000"  
5 = "5 $218,000 OR MORE" ;  
VALUE W500176W  
-7 = '-7 RF'  
-8 = '-8 DK'  
-1 = '-1 Inapplicable'  
-9 = '-9 Missing'  
1 = "1 LESS THAN $200"  
2 = "2 $200 TO LESS THAN $500"  
3 = "3 $500 TO LESS THAN $1,000"  
4 = "4 $1,000 TO LESS THAN $2,500"  
5 = "5 $2,500 OR MORE" ;
```

## SAS ALGORITHM FOR DEMENTIA

```
VALUE W500177W
-7 = '-7 RF'
-8 = '-8 DK'
-1 = '-1 Inapplicable'
-9 = '-9 Missing'
 1 = "1 LESS THAN $100"
 2 = "2 $100 TO LESS THAN $300"
 3 = "3 $300 TO LESS THAN $700"
 4 = "4 $700 TO LESS THAN $1,700"
 5 = "5 $1,700 OR MORE" ;

VALUE W500178W
-7 = '-7 RF'
-8 = '-8 DK'
-1 = '-1 Inapplicable'
-9 = '-9 Missing'
 1 = "1 LESS THAN $2,400"
 2 = "2 $2,400 TO LESS THAN $6,000"
 3 = "3 $6,000 TO LESS THAN $12,000"
 4 = "4 $12,000 TO LESS THAN $30,000"
 5 = "5 $30,000 OR MORE" ;

VALUE W500179W
-7 = '-7 RF'
-8 = '-8 DK'
-1 = '-1 Inapplicable'
-9 = '-9 Missing'
 1 = "1 LESS THAN $1,200"
 2 = "2 $1,200 TO LESS THAN $3,600"
 3 = "3 $3,600 TO LESS THAN $8,400"
 4 = "4 $8,400 TO LESS THAN $20,400"
 5 = "5 $20,400 OR MORE" ;

VALUE W500180W
-7 = '-7 RF'
-8 = '-8 DK'
-1 = '-1 Inapplicable'
-9 = '-9 Missing'
 1 = "1 LESS THAN $9,000"
 2 = "2 $9,000 TO LESS THAN $18,000"
 3 = "3 $18,000 TO LESS THAN $93,000"
 4 = "4 $93,000 TO LESS THAN $350,000"
 5 = "5 $350,000 OR MORE" ;

VALUE W500181W
-7 = '-7 RF'
-8 = '-8 DK'
-1 = '-1 Inapplicable'
-9 = '-9 Missing'
 1 = "1 LESS THAN $600"
 2 = "2 $600 TO LESS THAN $5,000"
 3 = "3 $5,000 TO LESS THAN $16,000"
 4 = "4 $16,000 TO LESS THAN $62,000"
 5 = "5 $62,000 OR MORE" ;

VALUE W500182W
-7 = '-7 RF'
-8 = '-8 DK'
-1 = '-1 Inapplicable'
-9 = '-9 Missing'
 1 = "1 LESS THAN $8,000"
 2 = "2 $8,000 TO LESS THAN $62,000"
```

## SAS ALGORITHM FOR DEMENTIA

```
3 = "3 $62,000 TO LESS THAN $192,000"  
4 = "4 $192,000 TO LESS THAN $213,000"  
5 = "5 $213,000 OR MORE" ;  
VALUE W500183W  
-7 = '-7 RF'  
-8 = '-8 DK'  
-1 = '-1 Inapplicable'  
-9 = '-9 Missing'  
1 = "1 LESS THAN $300"  
2 = "2 $300 TO LESS THAN $2,500"  
3 = "3 $2,500 TO LESS THAN $8,000"  
4 = "4 $8,000 TO LESS THAN $37,000"  
5 = "5 $37,000 OR MORE" ;  
VALUE W500184W  
-7 = '-7 RF'  
-8 = '-8 DK'  
-1 = '-1 Inapplicable'  
-9 = '-9 Missing'  
1 = "1 LESS THAN $11,000"  
2 = "2 $11,000 TO LESS THAN $25,000"  
3 = "3 $25,000 TO LESS THAN $50,000"  
4 = "4 $50,000 TO LESS THAN $108,000"  
5 = "5 $108,000 OR MORE" ;  
VALUE W500185W  
-7 = '-7 RF'  
-8 = '-8 DK'  
-1 = '-1 Inapplicable'  
-9 = '-9 Missing'  
1 = "1 LESS THAN $2,000"  
2 = "2 $2,000 TO LESS THAN $7,000"  
3 = "3 $7,000 TO LESS THAN $17,000"  
4 = "4 $17,000 TO LESS THAN $57,000"  
5 = "5 $57,000 OR MORE" ;  
VALUE W500186W  
-7 = '-7 RF'  
-8 = '-8 DK'  
-1 = '-1 Inapplicable'  
-9 = '-9 Missing'  
1 = "1 LESS THAN $8,000"  
2 = "2 $8,000 TO LESS THAN $13,000"  
3 = "3 $13,000 TO LESS THAN $28,000"  
4 = "4 $28,000 TO LESS THAN $54,000"  
5 = "5 $54,000 OR MORE" ;  
VALUE W500187W  
-7 = '-7 RF'  
-8 = '-8 DK'  
-1 = '-1 Inapplicable'  
-9 = '-9 Missing'  
1 = "1 LESS THAN $500"  
2 = "2 $500 TO LESS THAN $1,900"  
3 = "3 $1,900 TO LESS THAN $5,000"  
4 = "4 $5,000 TO LESS THAN $20,000"  
5 = "5 $20,000 OR MORE" ;  
VALUE W500188W  
-7 = '-7 RF'  
-8 = '-8 DK'  
-1 = '-1 Inapplicable'
```

## SAS ALGORITHM FOR DEMENTIA

```
-9 = '-9 Missing'
1 = "1 LESS THAN $200"
2 = "2 $200 TO LESS THAN $1,000"
3 = "3 $1,000 TO LESS THAN $4,000"
4 = "4 $4,000 TO LESS THAN $16,000"
5 = "5 $16,000 OR MORE" ;
VALUE W500189W
-7 = '-7 RF'
-8 = '-8 DK'
-1 = '-1 Inapplicable'
-9 = '-9 Missing'
1 = "1 LESS THAN $400"
2 = "2 $400 TO LESS THAN $1,000"
3 = "3 $1,000 TO LESS THAN $2,000"
4 = "4 $2,000 TO LESS THAN $11,000"
5 = "5 $11,000 OR MORE" ;
VALUE W500190W
-7 = '-7 RF'
-8 = '-8 DK'
-1 = '-1 Inapplicable'
-9 = '-9 Missing'
1 = "1 LESS THAN $30,000"
2 = "2 $30,000 TO LESS THAN $101,000"
3 = "3 $101,000 TO LESS THAN $247,000"
4 = "4 $247,000 TO LESS THAN $703,000"
5 = "5 $703,000 OR MORE" ;
VALUE W500191W
-7 = '-7 RF'
-8 = '-8 DK'
-1 = '-1 Inapplicable'
-9 = '-9 Missing'
1 = "1 LESS THAN $18,000"
2 = "2 $18,000 TO LESS THAN $68,000"
3 = "3 $68,000 TO LESS THAN $122,000"
4 = "4 $122,000 TO LESS THAN $293,000"
5 = "5 $293,000 OR MORE" ;
VALUE W500192W
-7 = '-7 RF'
-8 = '-8 DK'
-1 = '-1 Inapplicable'
-9 = '-9 Missing'
1 = "1 LESS THAN $3,600"
2 = "2 $3,600 TO LESS THAN $12,000"
3 = "3 $12,000 TO LESS THAN $25,000"
4 = "4 $25,000 TO LESS THAN $64,000"
5 = "5 $64,000 OR MORE" ;
VALUE W500193W
-7 = '-7 RF'
-8 = '-8 DK'
-1 = '-1 Inapplicable'
-9 = '-9 Missing'
1 = "1 LESS THAN $3,600"
2 = "2 $3,600 TO LESS THAN $7,200"
3 = "3 $7,200 TO LESS THAN $14,000"
4 = "4 $14,000 TO LESS THAN $38,000"
5 = "5 $38,000 OR MORE" ;
VALUE W500194W
```

## SAS ALGORITHM FOR DEMENTIA

```
-7 = '-7 RF'
-8 = '-8 DK'
-1 = '-1 Inapplicable'
-9 = '-9 Missing'
1 = "1 LESS THAN $30,000"
2 = "2 $30,000 TO LESS THAN $43,000"
3 = "3 $43,000 TO LESS THAN $66,000"
4 = "4 $66,000 TO LESS THAN $109,000"
5 = "5 $109,000 OR MORE" ;

VALUE W500195W
-7 = '-7 RF'
-8 = '-8 DK'
-1 = '-1 Inapplicable'
-9 = '-9 Missing'
1 = "1 LESS THAN $18,000"
2 = "2 $18,000 TO LESS THAN $22,000"
3 = "3 $22,000 TO LESS THAN $36,000"
4 = "4 $36,000 TO LESS THAN $56,000"
5 = "5 $56,000 OR MORE" ;

VALUE W500209W
-7 = '-7 RF'
-8 = '-8 DK'
-1 = '-1 Inapplicable'
-9 = '-9 Missing'
1 = "1 YES"
2 = "2 NO"
3 = "3 CANT DO - DONT DO" ;

VALUE W500196W
-7 = '-7 RF'
-8 = '-8 DK'
-1 = '-1 Inapplicable'
-9 = '-9 Missing'
1 = "1 LESS THAN $2,500"
2 = "2 $2,500 TO LESS THAN $5,000"
3 = "3 $5,000 TO LESS THAN $10,000"
4 = "4 $10,000 TO LESS THAN $20,000"
5 = "5 $20,000 TO LESS THAN $50,000"
6 = "6 $50,000 OR MORE" ;

VALUE dage2us
0 = "0 Less than age 1"
997 = "997 Born in US"
-8 = "-8 DK"
-7 = "-7 RF"
-1 = "-1 Inapplicable";

VALUE locsp
-9 = "-9 MISSING"
-8 = "-8 DK"
-7 = "-7 RF"
-1 = "-1 Inapplicable"
1 = "1 Independent Living"
2 = "2 Assisted Living"
3 = "3 Special Care Unit"
4 = "4 Nursing Home"
8 = "8 Not Reported" ;

VALUE resid
-9 = '-9 Missing'
```

## SAS ALGORITHM FOR DEMENTIA

```
-8 = "-8 DK"
-7 = "-7 RF"
-1 = "-1 Inapplicable"
1 = "Community"
2 = "Residential care not nursing home (SP interview)"
3 = "Residential care not nursing home (FQ only)"
4 = "Nursing home (SP interview)"
5 = "Nursing home (FQ only)"
6 = "Deceased"
7 = "Residential care not nursing home in R1 and R2 (FQ only)"
8 = "Nursing home in R1 and R2 (FQ only)";

VALUE residlml
  1 = "1 Community"
  2 = "2 Residential care"
  -1 = "-1 Inapplicable"
-9 = '-9 Missing';

VALUE SP50139W
  1 = "1 White/Caucasian"
  2 = "2 Black/African American"
  3 = "3 Other"
  -7 = '-7 RF'
  -8 = '-8 DK'
-9 = '-9 Missing';

VALUE Locat15w
  1= "1 Lives in same City and State as at age 15"
  2= "2 Lives in same state but different City (or DKRF city) as age
15"
  3= "3 Does not live in same State as age 15"
  -1= "-1 Inapplicable"
  -7 = '-7 RF'
  -8 = '-8 DK'
  -9 = '-9 Missing';

Value dresnew
  1 = "1 same residence as last int"
  2 = "2 new residence since last int"
  -1= "-1 Inapplicable"
  -7 = '-7 RF'
  -8 = '-8 DK'
  -9 = '-9 Missing';

Value dcontnew
  1 = "1 Continuing sample from R1"
  2 = "2 New sample in R5"
  -1= "-1 Inapplicable"
  -7 = '-7 RF'
  -8 = '-8 DK'
  -9 = '-9 Missing';

VALUE DMDDEVYR
  1 = ' 1 No Mobility device use in last year/since last interview'
  2 = ' 2 Mobility device use in last year/since last interview'
  -1 = '-1 Inapplicable '
  -7 = '-7 RF'
  -8 = '-8 DK'
```



## SAS ALGORITHM FOR DEMENTIA

```
-9 = '-9 Missing';

VALUE DMDEVST
  0 = '0 less than 1 month of mobility device use'
  1 = '1 month of mobility device use'
  2 = '2 months of mobility device use'
  3 = '3 months of mobility device use'
  4 = '4 months of mobility device use'
  5 = '5 months of mobility device use'
  6 = '6 months of mobility device use'
  7 = '7 months of mobility device use'
  8 = '8 months of mobility device use'
  9 = '9 months of mobility device use'
 10 = '10 months of mobility device use'
 11 = '11 months of mobility device use'
-7 = '-7 used last month but RF number of months of use in year'
-8 = '-8 used last month but DK number of months of use in year'
-1 = '-1 Inapplicable '
-2 = '-2 Not asked of continuing sample';

VALUE DMDEVEND
  0 = '0 Between 11 and 12 months since device use ended'
  1 = '1 month since mobility device use ended'
  2 = '2 months since mobility device use ended'
  3 = '3 months since mobility device use ended'
  4 = '4 months since mobility device use ended'
  5 = '5 months since mobility device use ended'
  6 = '6 months since mobility device use ended'
  7 = '7 months since mobility device use ended'
  8 = '8 months since mobility device use ended'
  9 = '9 months since mobility device use ended'
 10 = '10 months since mobility device use ended'
 11 = '11 months since mobility device use ended'
-7 = '-7 no use last month and RF number of months since device use
ended'
-8 = '-8 no use last month and DK number of months since device use
ended'
-1 = '-1 Inapplicable '
-2 = '-2 Not asked of continuing sample' ;

VALUE DMDHLPYR
  1 = " 1 No mobility help in last year/since last interview"
  2 = " 2 Mobility help in last year/since last interview"
-7 = " -7 RF"
-8 = " -8 DK"
-1 = " -1 Inapplicable "
  -2 = '-2 Not asked of continuing sample' ;

VALUE DMDHLPST
  0 = '0 less than 1 month of help'
  1 = '1 month of help'
  2 = '2 months of help'
  3 = '3 months of help'
  4 = '4 months of help'
  5 = '5 months of help'
  6 = '6 months of help'
  7 = '7 months of help'
  8 = '8 months of help'
```

## SAS ALGORITHM FOR DEMENTIA

```
    9 = '9 months of help'
   10 = '10 months of help'
   11 = '11 months of help'
  -7 = '-7 help last month but RF number of months of help in year'
  -8 = '-8 help last month but DK number of months of help in year'
-1 = " -1 Inapplicable "
-2 = " -2 Not asked of continuing sample ";
VALUE DMDHLPEN
  0 = '0 less than 1 month since help ended'
  1 = '1 month since help ended'
  2 = '2 months since help ended'
  3 = '3 months since help ended'
  4 = '4 months since help ended'
  5 = '5 months since help ended'
  6 = '6 months since help ended'
  7 = '7 months since help ended'
  8 = '8 months since help ended'
  9 = '9 months since help ended'
 10 = '10 months since help ended'
 11 = '11 months since help ended'
-7 = '-7 no help last month and RF number of months since help ended'
-8 = '-8 no help last month and DK number of months since help ended'
-1 = '-1 Inapplicable '
-2 = '-2 Not asked of continuing sample';
VALUE DMHLPYRS
  0 = '0 none or less than 1 year'
 997 = '997 since birth'
-7 = '-7 RF'
-8 = '-8 DK'
-1 = '-1 Inapplicable '
-2 = '-2 Not asked of continuing sample'
-9 = '-9 Missing';
VALUE DSDHLPYR
  1 = ' 1 No self care help in last year/since last interview'
  2 = ' 2 Self care help in last year/since last interview'
-1 = '-1 Inapplicable'
-7 = '-7 DK'
-8 = '-8 RF'
-9 = '-9 Missing';
VALUE DSHLPND
  0 = ' 0 Between 11 and 12 months since self care help ended'
  1 = '1 Month since self care help ended'
  2 = '2 Months since self care help ended'
  3 = '3 Months since self care help ended'
  4 = '4 Months since self care help ended'
  5 = '5 Months since self care help ended'
  6 = '6 Months since self care help ended'
  7 = '7 Months since self care help ended'
  8 = '8 Months since self care help ended'
  9 = '9 Months since self care help ended'
 10 = '10 Months since self care help ended'
 11 = '11 Months since self care help ended'
-7 = '-7 No help last month and RF number of months since help ended'
-8 = '-8 No help last month and DK number of months since help ended'
-1 = '-1 Inapplicable'
  -2 = '-2 Not asked of continuing sample'
-9 = '-9 Missing'      ;
```

## SAS ALGORITHM FOR DEMENTIA

```
VALUE DSHLPYRS
  0 = ' 0 None or less than 1 year of self care help'
 -7 = '-7 RF'
 -8 = '-8 DK'
 -1 = '-1 Inapplicable'
  -2 = '-2 Not asked of continuing sample'
 -9 = '-9 Missing'
 997 = '997 since birth';

VALUE SP5RH7W
 -7 = '-7 RF'
 -8 = '-8 DK'
 -1 = '-1 Inapplicable'
 -9 = '-9 Missing'
  1 = "1 As an overnight patient in a hospital, nursing home, or
rehab facility"
  2 = "2 At an outpatient center, clinic, or doctors office or
therapists office"
  3 = "3 At home"
  4 = "4 Somewhere else" ;

VALUE SP5LF5W
 -7 = '-7 RF'
 -8 = '-8 DK'
 -1 = '-1 Inapplicable'
 -9 = '-9 Missing'
 997 = "997 Number of hours vary each week" ;

VALUE DMH_GRP
  1 = "1 Help started"
  2 = "2 Help ended"
  3 = "3 Help both interviews with gap"
  4 = "4 Help both interviews with no gap"
  5 = "5 Help between interviews only"
  6 = "6 No help either interview or between"
 11 = "11 Help started (month started missing)"
 21 = "21 Help ended (month ended missing)"
 41 = "41 Help both interviews (DK whether gap)"
 61 = "61 No help either interview (DK whether help between)"
 -9 = "-9 Missing"
 -1 = "-1 Inapplicable"
  -3 = "-3 Not asked of new sample"
-999 = "-999 Not determined" ;

VALUE DMU_GRP
  1 = "1 Use started"
  2 = "2 Use ended"
  3 = "3 Use both interviews with gap"
  4 = "4 Use both interviews with no gap"
  5 = "5 Use between interviews only "
  6 = "6 No use either interview or between"
 11 = "11 Use started (month started missing)"
 21 = "21 Use ended (month ended missing)"
 41 = "41 Use both interviews (DK whether gap)"
 61 = "61 No use either interview (DK whether use between)"
 -9 = "-9 Missing"
 -1 = "-1 Inapplicable"
  -3 = "-3 Not asked of new sample"
```

## SAS ALGORITHM FOR DEMENTIA

```
-999 = "-999 Not determined" ;

VALUE DMDS5FLG
-1 = "-1 Inapplicable"
  -3 = "-3 Not asked of new sample"
  0 = "0 No current SP interview"
  1 = "1 No SP interview last round"
  2 = "2 Died and month death missing"
  3 = "3 Died <=1 month after last interview"
  4 = "4 Died 12-13 months after last interview"
  7 = "7 Skipped 1 or more help questions" ;
VALUE DS_GRP
  1 = "1 Help started"
  2 = "2 Help ended"
  3 = "3 Help both interviews with gap"
  4 = "4 Help both interviews with no gap"
  5 = "5 Help between interviews only"
  6 = "6 No help either interview or between"
 11 = "11 Help started (month started missing)"
 21 = "21 Help ended (month ended missing)"
 41 = "41 Help both interviews (DK whether gap)"
 61 = "61 No help either interview (DK whether help between)"
 -9 = "-9 Missing"
 -1 = "-1 Inapplicable"
  -3 = "-3 Not asked of new sample"
-999 = "-999 Not determined" ;
```

/\*

```
VALUE DMDSINTV
  0 = "0 Less than 1 month"
  1 = "1 Month"
  2 = "2 Months"
  3 = "3 Months"
  4 = "4 Months"
  5 = "5 Months"
  6 = "6 Months"
  7 = "7 Months"
  8 = "8 Months"
  9 = "9 Months"
 10 = "10 Months"
 11 = "11 Months"
 12 = "12 Months"
 13 = "13 Months"
 14 = "14 Months"
 15 = "15 Months"
 16 = "16 Months"
 17 = "17 Months"
 18 = "18 Months"
 19 = "19 Months"
 20 = "20 Months"
 21 = "21 Months"
 22 = "22 Months"
 23 = "23 Months"
 24 = "24 Months"
 90 = "90 Last round disputed"
 -1 = "-1 Inapplicable"
 -7 = "-7 Refused"
```

## SAS ALGORITHM FOR DEMENTIA

```
-8 = "-8 Dont know"  
-9 = "-9 Missing" ;
```

```
VALUE DMDS_DUR  
 0 = "0 Less than 1 month"  
 1 = "1 Month"  
 2 = "2 Months"  
 3 = "3 Months"  
 4 = "4 Months"  
 5 = "5 Months"  
 6 = "6 Months"  
 7 = "7 Months"  
 8 = "8 Months"  
 9 = "9 Months"  
10 = "10 Months"  
11 = "11 Months"  
12 = "12 Months"  
13 = "13 Months"  
14 = "14 Months"  
15 = "15 Months"  
16 = "16 Months"  
17 = "17 Months"  
90 = "90 Last round disputed"  
-1 = "-1 Inapplicable"  
-7 = "-7 Refused"  
-8 = "-8 Dont know"  
-9 = "-9 Missing"  
-10 = "-10 Not ascertained"  
-12 = "-12 Outside of range"  
-13 = "-13 None"  
-999 = "-999 Not determined" ;
```

```
VALUE DMDSFLG  
-1 = "-1 Inapplicable"  
 1 = "1 No SP interview last round"  
 2 = "2 Died and month death missing"  
 3 = "3 Died <=1 month after last interview"  
 4 = "4 Died 12-13 months after last interview"  
 5 = "5 Died and not mobile (fl2notmobile=1)"  
 6 = "6 Died and not alert (fl2notalert =1)"  
 7 = "7 Skipped 1 or more help questions" ;
```

```
VALUE DMDS3FLG  
-1 = "-1 Inapplicable"  
 1 = "1 No SP interview last round"  
 2 = "2 Died and month death missing"  
 3 = "3 Died <=1 month after last interview"  
 4 = "4 Died 12-13 months after last interview"  
 5 = "5 Died and not mobile (fl3notmobile=1)"  
 6 = "6 Died and not alert (fl3notalert =1)"  
 7 = "7 Skipped 1 or more help questions" ;  
VALUE flags  
 0= "0 NO CUR SP INT"  
 1= "1 No LAST SP INT"  
 2= "2 Died and mo death missing"  
 3= "3 Died <=1 mo after LAST INT"  
 4= "4 Died 12-13 mo after LAST INT"
```

## SAS ALGORITHM FOR DEMENTIA

```
5= "5 Died and not mobile"
6= "6 Died and not alert"
7= "7 Skipped help questions"
  -1= "-1 Inapplicable"
  -3="-3 Not asked of new sample";

*/

value groupmo 1 = "1 Started"
  2 = "2 Ended"
  3 = "3 Both times with gap"
  4 = "4 Both times no gap"
    5 = "5 Between only (end missing)"
  6 = "6 Neither time AND not between"
  11 = "11 Started (start missing)"
  21 = "21 Ended (end missing)"
  41 = "41 Both times (gap missing)"
  61 = "61 Neither time (between missing)"
    -1= "-1 Inapplicable"
    -3="-3 Not asked of new sample"
    -7= "-7 RF"
    -8= "-8 DK"
    -9= "-9 Missing"
  -999 = "-999 Not determined"
  -99 = "-99 Partial" ;

VALUE nw_mths 0 = "0 Less than 1 month"
1 ="1 month"
2 ="2 months"
3 ="3 months"
4 ="4 months"
5 ="5 months"
6 ="6 months"
7 ="7 months"
8 ="8 months"
9 ="9 months"
10= "10 months"
11= "11 months"
12= "12 months"
13= "13 months"
14= "14 months"
15= "15 months"
16= "16 months"
17= "17 months"
18= "18 months"
19= "19 months"
20= "20 months"
90= "90 Last round disputed"
999= "999 No months"
-1= "-1 Inapplicable"
  -3="-3 Not asked of new sample"
-7= "-7 RF"
-8= "-8 DK"
-9= "-9 Missing"
-10= "-10 Not ascertained"
-12= "-12 Outside of range (greater than months between
interviews)"
-13= "-13 None"
-999= "-999 Not determined"
```

## SAS ALGORITHM FOR DEMENTIA

```

-99= "-99 Partial";
      VALUE chntinhh
1 = "1 Yes, not in household"
-1= "-1 Inapplicable"
-7= "-7 RF"
-8= "-8 DK"
-9= "-9 Missing";
      Value d4mssadd
-1='-1 Inapplicable'
0='0 no flags and added at undetermined section'
1='1 no flags and added at CL section'
2='2 no flags and added at DT section'
3='3 no flags and added at EW section'
4='4 no flags and added at HA section'
5='5 no flags and added at HO section'
6='6 no flags and added at MC section'
7='7 no flags and added at MO section'
8='8 no flags and added at PA section'
9='9 no flags and added at PE section'
10='10 no flags and added at SC section'
11='11 no flags and added at SN section'
12='12 no flags and added at CS section'
13='13 no flags and added at HH section'
14='14 no flags and added at IS section'
15='15 no flags and added at HL section'
16='16 no flags and added at SL section';
      VALUE HA5DWHL
issue #5 6/20/16 */
1 = "1 Meals on wheels last month" /* updated per
-1 = "-1 Inapplicable";
      VALUE HA5DTKO
issue #6 6/20/16 */
1 = "1 Restaurant or take out last month" /* updated per
-1 = "-1 Inapplicable";
      VALUE RE5BLDG /* updated per issue #25
6/20/16 */
-7 = '-7 RF'
-8 = '-8 DK'
-1 = '-1 Inapplicable'
-9 = '-9 Missing'
1 = "1 Building has one floor"
2 = "2 Building has multiple floors" ;
VALUE S000163W
1 = "1 PRIVACY MORE IMPORTANT"
2 = "2 SOCIALIZE MORE IMPORTANT"
3 = "3 BOTH IMPORTANT/CANT CHOOSE/DONT KNOW"
-1= "-1 Inapplicable"
-7= "-7 RF"
-8= "-8 DK"
-9= "-9 Missing";

VALUE S000164W
1 = "1 SOCIALIZE MORE IMPORTANT"
2 = "2 PRIVACY MORE IMPORTANT"
3 = "3 BOTH IMPORTANT/CANT CHOOSE/DONT KNOW"
-1= "-1 Inapplicable"
-7= "-7 RF"

```

## SAS ALGORITHM FOR DEMENTIA

```
-8= "-8 DK"  
-9= "-9 Missing";
```

```
VALUE S000165W  
  1 = "1 BEING SAFE MORE IMPORTANT"  
  2 = "2 HAVING CHOICES MORE IMPORTANT"  
  3 = "3 BOTH IMPORTANT/CANT CHOOSE/DONT KNOW"  
-1= "-1 Inapplicable"  
-7= "-7 RF"  
-8= "-8 DK"  
-9= "-9 Missing" ;
```

```
VALUE S000166W  
  1 = "1 HAVING CHOICES MORE IMPORTANT"  
  2 = "2 BEING SAFE MORE IMPORTANT"  
  3 = "3 BOTH IMPORTANT/CANT CHOOSE/DONT KNOW"  
-1= "-1 Inapplicable"  
-7= "-7 RF"  
-8= "-8 DK"  
-9= "-9 Missing" ;
```

```
VALUE S000167W  
  1 = "1 PRIVACY MORE IMPORTANT"  
  2 = "2 BEING SAFE MORE IMPORTANT"  
  3 = "3 BOTH IMPORTANT/CANT CHOOSE/DONT KNOW"  
-1= "-1 Inapplicable"  
-7= "-7 RF"  
-8= "-8 DK"  
-9= "-9 Missing" ;
```

```
VALUE S000168W  
  1 = "1 BEING SAFE MORE IMPORTANT"  
  2 = "2 PRIVACY MORE IMPORTANT"  
  3 = "3 BOTH IMPORTANT/CANT CHOOSE/DONT KNOW"  
-1= "-1 Inapplicable"  
-7= "-7 RF"  
-8= "-8 DK"  
-9= "-9 Missing" ;
```

```
VALUE S000169W  
  1 = "1 SOCIALIZING MORE IMPORTANT"  
  2 = "2 HAVING CHOICES MORE IMPORTANT"  
  3 = "3 BOTH IMPORTANT/CANT CHOOSE/DONT KNOW"  
-1= "-1 Inapplicable"  
-7= "-7 RF"  
-8= "-8 DK"  
-9= "-9 Missing" ;
```

```
VALUE S000170W  
  1 = "1 HAVING CHOICES MORE IMPORTANT"  
  2 = "2 SOCIALIZING MORE IMPORTANT"  
  3 = "3 BOTH IMPORTANT/CANT CHOOSE/DONT KNOW"  
-1= "-1 Inapplicable"  
-7= "-7 RF"  
-8= "-8 DK"  
-9= "-9 Missing" ;
```



## SAS ALGORITHM FOR DEMENTIA

```
VALUE S000171W
  1 = "1 PRIVACY MORE IMPORTANT"
  2 = "2 HAVING CHOICES MORE IMPORTANT"
  3 = "3 BOTH IMPORTANT/CANT CHOOSE/DONT KNOW"
  -1= "-1 Inapplicable"
  -7= "-7 RF"
  -8= "-8 DK"
  -9= "-9 Missing" ;
```

```
VALUE S000172W
  1 = "1 HAVING CHOICES MORE IMPORTANT"
  2 = "2 PRIVACY MORE IMPORTANT"
  3 = "3 BOTH IMPORTANT/CANT CHOOSE/DONT KNOW"
  -1= "-1 Inapplicable"
  -7= "-7 RF"
  -8= "-8 DK"
  -9= "-9 Missing" ;
```

```
VALUE S000173W
  1 = "1 SOCIALIZING MORE IMPORTANT"
  2 = "2 BEING SAFE MORE IMPORTANT"
  3 = "3 BOTH IMPORTANT/CANT CHOOSE/DONT KNOW"
  -1= "-1 Inapplicable"
  -7= "-7 RF"
  -8= "-8 DK"
  -9= "-9 Missing" ;
```

```
VALUE S000174W
  1 = "1 BEING SAFE MORE IMPORTANT"
  2 = "2 SOCIALIZING MORE IMPORTANT"
  3 = "3 BOTH IMPORTANT/CANT CHOOSE/DONT KNOW"
  -1= "-1 Inapplicable"
  -7= "-7 RF"
  -8= "-8 DK"
  -9= "-9 Missing" ;
```

```
VALUE S000175W
  1 = "1 LESS THAN 1 HOUR"
  2 = "2 MORE THAN 1 HOUR"
  3 = "3 ABOUT 1 HOUR"
  -1= "-1 Inapplicable"
  -7= "-7 RF"
  -8= "-8 DK"
  -9= "-9 Missing" ;
```

```
VALUE S000176W
  1 = "1 LESS THAN 15 MINUTES"
  2 = "2 15 MINUTES"
  3 = "3 BETWEEN 15 AND 30 MINUTES"
  4 = "4 30 MINUTES"
  5 = "5 BETWEEN 30 AND 45 MINUTES"
  6 = "6 45 MINUTES"
  7 = "7 BETWEEN 45 AND 60 MINUTES"
  -1= "-1 Inapplicable"
  -7= "-7 RF"
  -8= "-8 DK"
  -9= "-9 Missing" ;
```

## SAS ALGORITHM FOR DEMENTIA

```
VALUE S000177W
  1 = "1 ABOUT 1 HOURS"
  2 = "2 ABOUT 2 HOURS"
  3 = "3 ABOUT 3 HOURS"
  4 = "4 ABOUT 4 HOURS"
  5 = "5 ABOUT 5 HOURS"
  6 = "6 6 OR MORE HOURS"
-1= "-1 Inapplicable"
-7= "-7 RF"
-8= "-8 DK"
-9= "-9 Missing" ;

  VALUE W600001W
-7 = '-7 RF'
-8 = '-8 DK'
-1 = '-1 Inapplicable'
-9 = '-9 Missing'
  1 = "1 STRONGLY AGREE"
  2 = "2 AGREE"
  3 = "3 DISAGREE"
  4 = "4 STRONGLY DISAGREE";
  VALUE W600002W
-7 = '-7 RF'
-8 = '-8 DK'
-1 = '-1 Inapplicable'
-9 = '-9 Missing'
  0 = "0 NONE"
  1 = "1 1-2"
  2 = "2 3-5"
  3 = "3 6-10"
  4 = "4 11-15"
  5 = "5 16-20"
  6 = "6 MORE THAN 20";
  VALUE W600003W
-7 = '-7 RF'
-8 = '-8 DK'
-1 = '-1 Inapplicable'
-9 = '-9 Missing'
  1 = "1 A (picture showing 4 pills)"
  2 = "2 B (picture showing 8 pills)"
  3 = "3 C (picture showing 12 pills)"
  4 = "4 D (picture showing 16 pills)"
  5 = "5 E (picture showing 20 pills)"
  6 = "6 F (picture showing 24 pills)";

  VALUE YNF
-7 = '-7 RF'
-8 = '-8 DK'
-1 = '-1 Inapplicable'
-9 = '-9 Missing'
  1 = "1 Yes"
  2 = "2 No";
  VALUE FQ6DLOCA
  1 = "1 Independent Living"
  2 = "2 Assisted Living"
  3 = "3 Special Care Unit"
```

## SAS ALGORITHM FOR DEMENTIA

```

4 = "4 Nursing home"
-8 = "-8 Not reported"
-1 = "-1 Inapplicable";
    VALUE R6DRES1A
1 = '1 Community'
2 = '2 Residential Care'
-1 = '-1 Inapplicable'
-9 = '-9 Missing';
    VALUE SP30023W
-7 = '-7 RF'
-8 = '-8 DK'
-1 = '-1 Inapplicable'
-9 = '-9 Missing'
1 = "1 Building has one floor"
2 = "2 Building has multiple floors" ;
    VALUE RE5BLDG
-7 = '-7 RF'
-8 = '-8 DK'
-1 = '-1 Inapplicable'
-9 = '-9 Missing'
1 = "1 Building has one floor"
2 = "2 Building has multiple floors" ;
VALUE WORDRECC
-1 = '-1 Inapplicable'
-2 = '-2 Proxy says cannot ask SP'
-3 = '-3 Proxy says can ask SP but SP unable to answer'
-7 = '-7 SP refused activity'
-9 = '-9 Missing';
    VALUE OLDMTHS
-7 = '-7 RF'
-8 = '-8 DK'
-1 = '-1 Inapplicable'
-9 = '-9 Missing';
    VALUE MONTHS
-7 = '-7 RF'
-8 = '-8 DK'
-1 = '-1 Inapplicable'
-9 = '-9 Missing';
    VALUE FLAGS
-1 = "-1 Inapplicable"
-3 = "-3 Not asked of new sample"
0 = "0 No current SP interview"
1 = "1 No SP interview last round"
2 = "2 Died and month death missing"
3 = "3 Died <=1 month after last interview"
4 = "4 Died 12-13 months after last interview"
7 = "7 Skipped 1 or more help questions" ;
VALUE DMDEVUSE
0 = '0 none or less than 1 year'
997 = '997 since birth'
-7 = '-7 RF'
-8 = '-8 DK'
-1 = '-1 Inapplicable '
-2 = '-2 Not asked of continuing sample'
-9 = '-9 Missing';
VALUE SPPB_MISSING
-7 = '-7 RF'

```

## SAS ALGORITHM FOR DEMENTIA

```
-8 = '-8 DK'  
-9 = '-9 Missing'  
-1="-1 Inapplicable"  
1="1 Proxy interview"  
2="2 Missing walk and repeat chair and balance"  
3="3 Missing walk and repeat chair"  
4="4 Missing walk and balance"  
5="5 Missing repeat chair and balance"  
6="6 Missing walk"  
7="7 Missing repeat chair"  
8="8 Missing balance"  
9="9 No space"  
10="10 No chair"  
11="11 No space walk and no chair"  
12="12 No space walk and non-safety missing"  
13="13 No chair and non-safety missing"  
14="14 Non-safety walk"  
15="15 Non-safety chair"  
16="16 Non-safety balance"  
17="17 Non-safety walk and chair"  
18="18 Non-safety walk and balance"  
19="19 Non-safety chair and balance"  
20="20 Non-safety walk and chair and balance";
```

**run;**

```
/*=====*/
```

```
/* NHATS_Round_7_Combined_PROC_FORMAT_Statement.sas */
```

**PROC FORMAT ;**

VALUE release

```
-1 = '-1 Inapplicable'  
1 = '1 Main Sample'  
2 = '2 Reserve Sample'  
9 = '9 New Release Sample';
```

VALUE STAT\_DTa

```
4 = " 4 April"  
5 = " 5 May"  
6 = " 6 June"  
7 = " 7 July"  
8 = " 8 August"  
9 = " 9 September"  
10 = "10 October"  
11 = "11 November"  
99 = "99 Prior to start of field work"  
-1 = '-1 Inapplicable';
```

VALUE \$DISP

```
'10' = "10 Not Available "  
'11' = "11 Ready"  
'12' = "12 Started "  
'20' = "20 Final "  
'24' = "24 Not Required "
```

## SAS ALGORITHM FOR DEMENTIA

```
'60' = "60 Complete "  
'61' = "61 Complete, NH facility"  
'62' = "62 Complete SP Deceased, Proxy Intv"  
'63' = "63 Complete SP, FQ not complete"  
'64' = "64 Complete FQ, SP not complete"  
'75' = "75 Physically/mentally unable to participate, no proxy"  
'76' = "76 Too ill to participate, no proxy"  
'77' = "77 Refusal, SP"  
'78' = "78 Language barrier"  
'79' = "79 Unable to locate"  
'80' = "80 Unavailable during field period"  
'82' = "82 Outside of PSU"  
'83' = "83 Ineligible"  
'85' = "85 Refusal, facility"  
'86' = "86 Deceased"  
'87' = "87 Refusal, proxy"  
'88' = "88 Work stopped" ;
```

VALUE DISP\_a

```
10 = "10 Not Available"  
11 = "11 Ready"  
12 = "12 Started"  
20 = "20 Final"  
24 = "24 Not Required"  
60 = "60 Complete"  
61 = "61 Complete, NH facility"  
62 = "62 Complete SP Deceased, Proxy Intv"  
63 = "63 Complete SP, FQ not complete"  
64 = "64 Complete FQ, SP not complete "  
75 = "75 Physically/mentally unable to participate, no proxy"  
76 = "76 Too ill to participate, no proxy"  
77 = "77 Refusal, SP"  
78 = "78 Language barrier"  
79 = "79 Unable to locate"  
80 = "80 Unavailable during field period"  
82 = "82 Outside of PSU"  
83 = "83 Ineligible"  
85 = "85 Refusal, facility"  
86 = "86 Deceased"  
87 = "87 Refusal, proxy"  
88 = "88 Work stopped" ;
```

VALUE DISP\_

```
10 = "10 Not Available"  
11 = "11 Ready"  
12 = "12 Started"  
20 = "20 Final"  
24 = "24 Not Required";
```

VALUE DISP\_F

```
-1 = '-1 Inapplicable'  
10 = "10 Not Available"  
11 = "11 Ready"  
12 = "12 Started"  
20 = "20 Final"  
24 = "24 Not Required"  
60 = "60 Complete"
```

## SAS ALGORITHM FOR DEMENTIA

```
61 = "61 Complete, NH facility"  
62 = "62 Complete SP Deceased, Proxy Intv"  
63 = "63 Complete SP, FQ not complete"  
64 = "64 Complete FQ, SP not complete "  
75 = "75 Physically/mentally unable to participate, no proxy"  
76 = "76 Too ill to participate, no proxy"  
77 = "77 Refusal, SP"  
78 = "78 Language barrier"  
79 = "79 Unable to locate"  
80 = "80 Unavailable during field period"  
81 = "81 Final deceased, new sample only"  
82 = "82 Outside of PSU"  
83 = "83 Ineligible"  
85 = "85 Refusal, facility"  
86 = "86 Deceased"  
87 = "87 Refusal, proxy"  
88 = "88 Work stopped"  
89 = "89 Final, Other Specify";
```

```
VALUE RFDK
```

```
-7 = '-7 RF'  
-8 = '-8 DK'  
-1 = '-1 Inapplicable'  
-9 = '-9 Missing';
```

```
VALUE $RFDK_F
```

```
'-7' = '-7 RF'  
'-8' = '-8 DK'  
'-1' = '-1 Inapplicable'  
'-9' = '-9 Missing';
```

```
VALUE RFDK_F
```

```
-7 = '-7 RF'  
-8 = '-8 DK'  
-1 = '-1 Inapplicable'  
-9 = '-9 Missing';
```

```
VALUE RFDK_B
```

```
-1 = '-1 Inapplicable'  
1 = '1 Yes-Breakoff';
```

```
VALUE $RFDK_C
```

```
'-1' = '-1 Inapplicable'  
'CL' = 'CL - Closing'  
'EW' = 'EW - Economic Well-Being'  
'FQ' = 'FQ - Facility Questionnaire'  
'HL' = 'HL - Helper'  
'HW' = 'HW - Height and Weight'  
'IP' = 'IP - Insurance Plans'  
'LF' = 'LF - Labor Force'  
'PA' = 'PA - Participation'  
'PE' = 'PE - Performance'  
'WB' = 'WB - Well-being' ;
```

```
VALUE $RFDK_2C
```

```
'-1' = '-1 Inapplicable'  
'-7' = '-7 RF'
```

## SAS ALGORITHM FOR DEMENTIA

```
'-8' = '-8 DK'  
'-9' = '-9 Missing';
```

```
VALUE RFDK_Y  
 1 = ' 1 Yes'  
-7 = '-7 RF'  
-8 = '-8 DK'  
-1 = '-1 Inapplicable'  
-9 = '-9 Missing';
```

```
VALUE RFDK_I  
 0 = ' 0 No'  
 1 = ' 1 Yes'  
-7 = '-7 RF'  
-8 = '-8 DK'  
-1 = '-1 Inapplicable'  
-9 = '-9 Missing';
```

```
VALUE RFDK_YN  
 1 = ' 1 Yes'  
 2 = ' 2 No'  
-7 = '-7 RF'  
-8 = '-8 DK'  
-1 = '-1 Inapplicable'  
-9 = '-9 Missing';
```

```
VALUE DSTRP_G  
-7 = '-7 RF'  
-8 = '-8 DK'  
-1 = '-1 Inapplicable'  
-9 = '-9 Missing'  
 1 = '1 X condition and word color condition accuracy below threshold  
(less than .42)'  
 2 = '2 word condition only below threshold (less than .42)'  
 3 = '3 X condition and word color condition meet criteria for accuracy'  
 4 = '4 fewer than 50% of X and word color condition trials answered'  
999 = '999 X condition only below threshold (less than .42)';
```

```
VALUE DSTRP_R  
-7 = '-7 RF'  
-8 = '-8 DK'  
-1 = '-1 Inapplicable'  
-999 = '-999 Inapplicable'  
other = 'Values ranging between -.353 and 1.115';
```

```
VALUE DSTRP_M  
-7 = '-7 RF'  
-8 = '-8 DK'  
-1 = '-1 Inapplicable'  
-999 = '-999 Inapplicable'  
other = 'Values ranging between -544.732 and 924.863';
```

```
VALUE FQ_4F  
-7 = '-7 RF'  
-8 = '-8 DK'  
-1 = '-1 Inapplicable'  
-9 = '-9 Missing'
```

## SAS ALGORITHM FOR DEMENTIA

```
1='1 YES'  
2='2 NO';
```

```
VALUE CHILDDDEC  
1 = '1 CHILD DECEASED'  
-7 = '-7 RF'  
-8 = '-8 DK'  
-1 = '-1 Inapplicable'  
-9 = '-9 Missing';
```

```
VALUE W200001W  
12 = "12 STARTED"  
20 = "20 COMPLETE"  
21 = "21 INELIGIBLE - NOT 65+" ;
```

```
VALUE W200008x  
-7 = '-7 RF'  
-8 = '-8 DK'  
-1 = '-1 Inapplicable'  
-9 = '-9 Missing'  
1 = "1 UNDER 20"  
2 = "2 20-24"  
3 = "3 25-29"  
4 = "4 30-34"  
5 = "5 35-39"  
6 = "6 40-44"  
7 = "7 45-49"  
8 = "8 50-54"  
9 = "9 55-59"  
10 = "10 60-64"  
11 = "11 65-69"  
12 = "12 70-74"  
13 = "13 75-79"  
14 = "14 80-84"  
15 = "15 85-89"  
16 = "16 90 +";
```

```
VALUE W200009W  
-7 = '-7 RF'  
-8 = '-8 DK'  
-1 = '-1 Inapplicable'  
-9 = '-9 Missing'  
1 = "1 SAMPLE PERSON"  
2 = "2 SPOUSE/ PARTNER"  
3 = "3 DAUGHTER"  
4 = "4 SON"  
5 = "5 DAUGHTER-IN-LAW"  
6 = "6 SON-IN-LAW"  
7 = "7 STEPDAUGHTER"  
8 = "8 STEPSON"  
9 = "9 SISTER"  
10 = "10 BROTHER"  
11 = "11 SISTER-IN-LAW"  
12 = "12 BROTHER-IN-LAW"  
13 = "13 MOTHER"  
14 = "14 STEPMOTHER"  
15 = "15 MOTHER-IN-LAW"
```



## SAS ALGORITHM FOR DEMENTIA

```
16 = "16 FATHER"  
17 = "17 STEPFATHER"  
18 = "18 FATHER-IN-LAW"  
19 = "19 GRANDDAUGHTER"  
20 = "20 GRANDSON"  
21 = "21 NIECE"  
22 = "22 NEPHEW"  
23 = "23 AUNT"  
24 = "24 UNCLE"  
25 = "25 COUSIN"  
26 = "26 STEPDAUGHTER'S SON/ DAUGHTER"  
27 = "27 STEPSON'S SON/ DAUGHTER"  
28 = "28 DAUGHTER-IN-LAW'S SON/ DAUGHTER"  
29 = "29 SON-IN-LAW'S SON/ DAUGHTER"  
30 = "30 BOARDER/RENTER"  
31 = "31 PAID AIDE/ HOUSEKEEPER/ EMPLOYEE"  
32 = "32 ROOMMATE"  
33 = "33 EX-WIFE/ EX-HUSBAND"  
34 = "34 BOYFRIEND/ GIRLFRIEND"  
35 = "35 NEIGHBOR"  
36 = "36 FRIEND"  
37 = "37 SOMEONE/SERVICE AT THE PLACE SP LIVES/LIVED"  
38 = "38 CO-WORKER"  
39 = "39 MINISTER, PRIEST, OR OTHER CLERGY"  
40 = "40 PSYCHIATRIST, PSYCHOLOGIST, COUNSELOR, OR THERAPIST"  
41 = "41 DECEASED SPOUSE/PARTNER"  
91 = "91 OTHER RELATIVE"  
92 = "92 OTHER NONRELATIVE" ;
```

```
VALUE W200002W
```

```
-7 = '-7 RF'  
-8 = '-8 DK'  
-1 = '-1 Inapplicable'  
-9 = '-9 Missing'  
1 = "1 MALE"  
2 = "2 FEMALE";
```

```
VALUE W200005W
```

```
-7 = '-7 RF'  
-8 = '-8 DK'  
-1 = '-1 Inapplicable'  
-9 = '-9 Missing'  
1 = "1 NO SCHOOLING COMPLETED"  
2 = "2 1ST-8TH GRADE"  
3 = "3 9TH-12TH GRADE (NO DIPLOMA)"  
4 = "4 HIGH SCHOOL GRADUATE (HIGH SCHOOL DIPLOMA OR EQUIVALENT)"  
5 = "5 VOCATIONAL, TECHNICAL, BUSINESS, OR TRADE SCHOOL CERTIFICATE OR  
DIPLOMA (BEYOND HIGH SCHOOL LEVEL)"  
6 = "6 SOME COLLEGE BUT NO DEGREE"  
7 = "7 ASSOCIATE'S DEGREE"  
8 = "8 BACHELOR'S DEGREE"  
9 = "9 MASTER'S, PROFESSIONAL, OR DOCTORAL DEGREE" ;
```

```
VALUE W200010W
```

```
-7 = '-7 RF'  
-8 = '-8 DK'  
-1 = '-1 Inapplicable'
```

## SAS ALGORITHM FOR DEMENTIA

```
-9 = '-9 Missing'  
1 = "1 MARRIED"  
2 = "2 LIVING WITH A PARTNER"  
3 = "3 SEPARATED"  
4 = "4 DIVORCED"  
5 = "5 WIDOWED"  
6 = "6 NEVER MARRIED";
```

```
VALUE W200011W
```

```
-7 = '-7 RF'  
-8 = '-8 DK'  
-1 = '-1 Inapplicable'  
-9 = '-9 Missing'  
1 = "1 YES"  
2 = "2 NO"  
7 = "7 PREVIOUSLY REPORTED" ;
```

```
VALUE W200012W
```

```
-7 = '-7 RF'  
-8 = '-8 DK'  
-1 = '-1 Inapplicable'  
-9 = '-9 Missing'  
1 = "1 REGULAR"  
2 = "2 VARIED" ;
```

```
VALUE W200013W
```

```
-7 = '-7 RF'  
-8 = '-8 DK'  
-1 = '-1 Inapplicable'  
-9 = '-9 Missing'  
1 = "1 SP AND/OR FAMILY"  
2 = "2 GOVERNMENT PROGRAM"  
3 = "3 INSURANCE"  
91 = "91 OTHER (SPECIFY)" ;
```

```
VALUE W200015W
```

```
-7 = '-7 RF'  
-8 = '-8 DK'  
-1 = '-1 Inapplicable'  
-9 = '-9 Missing'  
1='1 HOURLY'  
2='2 WEEKLY'  
3='3 MONTHLY'  
4='4 DID NOT PAY IN LAST MONTH'  
91 = "91 OTHER (SPECIFY)" ;
```

```
VALUE W200016W
```

```
-7 = '-7 RF'  
-8 = '-8 DK'  
-1 = '-1 Inapplicable'  
-9 = '-9 Missing'  
1 = "1 MEDICAID"  
2 = "2 MEDICARE"  
3 = "3 STATE PROGRAM"  
91 = "91 OTHER (SPECIFY)" ;
```

```
VALUE W200018W
```

```
-7 = '-7 RF'
```

## SAS ALGORITHM FOR DEMENTIA

```
-8 = '-8 DK'  
-1 = '-1 Inapplicable'  
-9 = '-9 Missing'  
1 = "1 FREE-STANDING (DETACHED) SINGLE HOUSE"  
2 = "2 SINGLE HOUSE BUT ATTACHED TO OTHERS (ROW HOUSE, TOWNHOUSE, DUPLEX,  
TRIPLEX, OR TRIPLE DECKER)"  
3 = "3 MOBILE HOME OR TRAILER"  
4 = "4 MULTI-UNIT (2+) BUILDING"  
91 = "91 OTHER (SPECIFY)" ;
```

VALUE W200020W

```
-7 = '-7 RF'  
-8 = '-8 DK'  
-1 = '-1 Inapplicable'  
-9 = '-9 Missing'  
1 = "1 HOME"  
2 = "2 MULTI-UNIT"  
3 = "3 OTHER" ;
```

VALUE W200021W

```
-7 = '-7 RF'  
-8 = '-8 DK'  
-1 = '-1 Inapplicable'  
-9 = '-9 Missing'  
1 = "1 BUILDING HAS ONE FLOOR"  
2 = "2 BUILDING HAS MULTIPLE FLOORS" ;
```

VALUE W200022W

```
-7 = '-7 RF'  
-8 = '-8 DK'  
-1 = '-1 Inapplicable'  
-9 = '-9 Missing'  
1 = "1 HOME"  
2 = "2 APARTMENT"  
3 = "3 ROOM"  
4 = "4 UNIT"  
5 = "5 SUITE"  
6 = "6 SOMETHING ELSE (SPECIFY)" ;
```

VALUE W200030W

```
-7 = '-7 RF'  
-8 = '-8 DK'  
-1 = '-1 Inapplicable'  
-9 = '-9 Missing'  
1 = "1 SAMPLE PERSON (SP)"  
2 = "2 PROXY" ;
```

VALUE W200032W

```
-7 = '-7 RF'  
-8 = '-8 DK'  
-1 = '-1 Inapplicable'  
-9 = '-9 Missing'  
1 = "1 HOSPITAL"  
2 = "2 NURSING HOME/REHAB CENTER"  
91 = "91 OTHER (SPECIFY)" ;
```

VALUE W200035W

## SAS ALGORITHM FOR DEMENTIA

```
-1 = '-1 Inapplicable'  
-9 = '-9 Missing'  
1 = "1 SELF"  
2 = "2 SPOUSE/ PARTNER"  
3 = "3 DAUGHTER"  
4 = "4 SON"  
5 = "5 DAUGHTER-IN-LAW"  
6 = "6 SON-IN-LAW"  
7 = "7 STEPDAUGHTER"  
8 = "8 STEPSON"  
9 = "9 SISTER"  
10 = "10 BROTHER"  
11 = "11 SISTER-IN-LAW"  
12 = "12 BROTHER-IN-LAW"  
13 = "13 MOTHER"  
14 = "14 STEPMOTHER"  
15 = "15 MOTHER-IN-LAW"  
16 = "16 FATHER"  
17 = "17 STEPFATHER"  
18 = "18 FATHER-IN-LAW"  
19 = "19 GRANDDAUGHTER"  
20 = "20 GRANDSON"  
21 = "21 NIECE"  
22 = "22 NEPHEW"  
23 = "23 AUNT"  
24 = "24 UNCLE"  
25 = "25 COUSIN"  
26 = "26 STEPDAUGHTER'S SON/ DAUGHTER"  
27 = "27 STEPSON'S SON/ DAUGHTER"  
28 = "28 DAUGHTER-IN-LAW'S SON/ DAUGHTER"  
29 = "29 SON-IN-LAW'S SON/ DAUGHTER"  
30 = "30 BOARDER/RENTER"  
31 = "31 PAID AIDE/ HOUSEKEEPER/ EMPLOYEE"  
32 = "32 ROOMMATE"  
33 = "33 EX-WIFE/ EX-HUSBAND"  
34 = "34 BOYFRIEND/ GIRLFRIEND"  
35 = "35 NEIGHBOR"  
36 = "36 FRIEND"  
37 = "37 SOMEONE/SERVICE FROM THE PLACE SP LIVES/DIED"  
38 = "38 CO-WORKER"  
39 = "39 MINISTER, PRIEST, OR OTHER CLERGY"  
40 = "40 PSYCHIATRIST, PSYCHOLOGIST, COUNSELOR, OR THERAPIST"  
91 = "91 OTHER RELATIVE"  
92 = "92 OTHER NONRELATIVE" ;
```

VALUE W200036W

```
-7 = '-7 RF'  
-8 = '-8 DK'  
-1 = '-1 Inapplicable'  
-9 = '-9 Missing'  
1 = "1 VERY FAMILIAR"  
2 = "2 SOMEWHAT FAMILIAR"  
3 = "3 A LITTLE FAMILIAR"  
4 = "4 NOT AT ALL FAMILIAR" ;
```

VALUE W200037W

```
-7 = '-7 RF'
```

## SAS ALGORITHM FOR DEMENTIA

```
-8 = '-8 DK'  
-1 = '-1 Inapplicable'  
-9 = '-9 Missing'  
1 = "1 YES, SAME ADDRESS"  
2 = "2 NO, DIFFERENT ADDRESS"  
3 = "3 YES, SAME ADDRESS WITH MINOR CORRECTIONS" ;
```

VALUE W200038W

```
-7 = '-7 RF'  
-8 = '-8 DK'  
-1 = '-1 Inapplicable'  
-9 = '-9 Missing'  
1 = "1 JANUARY"  
2 = "2 FEBRUARY"  
3 = "3 MARCH"  
4 = "4 APRIL"  
5 = "5 MAY"  
6 = "6 JUNE"  
7 = "7 JULY"  
8 = "8 AUGUST"  
9 = "9 SEPTEMBER"  
10 = "10 OCTOBER"  
11 = "11 NOVEMBER"  
12 = "12 DECEMBER" ;
```

VALUE W200039W

```
-7 = '-7 RF'  
-8 = '-8 DK'  
-1 = '-1 Inapplicable'  
-9 = '-9 Missing'  
1 = "1 2011"  
2 = "2 2012"  
3 = "3 YEAR2013"  
4 = "4 YEAR2014"  
5 = "5 YEAR2015"  
6 = "6 YEAR2016"  
7 = "7 YEAR2017"  
8 = "8 YEAR2018"  
9 = "9 YEAR2019"  
10 = "10 YEAR2020" ;
```

VALUE W200040W

```
-7 = '-7 RF'  
-8 = '-8 DK'  
-1 = '-1 Inapplicable'  
-9 = '-9 Missing'  
1 = "1 2011"  
2 = "2 2012" ;
```

VALUE W200041W

```
-7 = '-7 RF'  
-8 = '-8 DK'  
-1 = '-1 Inapplicable'  
-9 = '-9 Missing'  
1 = "1 AT SPS OR SOMEONE ELSE'S HOME"  
2 = "2 IN A HOSPITAL"  
3 = "3 IN A NURSING HOME"
```

## SAS ALGORITHM FOR DEMENTIA

```
4 = "4 IN A HOSPICE RESIDENCE"  
5 = "5 IN TRANSIT (AMBULANCE TO HOSPITAL)"  
91 = "91 SOMEWHERE ELSE (SPECIFY)";
```

```
VALUE W200042W  
-7 = '-7 RF'  
-8 = '-8 DK'  
-1 = '-1 Inapplicable'  
-9 = '-9 Missing'  
1 = "1 SP'S HOME"  
2 = "2 SOMEONE ELSE'S HOME" ;
```

```
VALUE W200043W  
-7 = '-7 RF'  
-8 = '-8 DK'  
-1 = '-1 Inapplicable'  
-9 = '-9 Missing'  
1 = "1 INTENSIVE CARE UNIT"  
2 = "2 PALLIATIVE CARE UNIT"  
3 = "3 INPATIENT HOSPICE UNIT"  
4 = "4 EMERGENCY ROOM"  
5 = "5 ANOTHER KIND OF UNIT" ;
```

```
VALUE W200044W  
-7 = '-7 RF'  
-8 = '-8 DK'  
-1 = '-1 Inapplicable'  
-9 = '-9 Missing'  
1 = "1 HOSPICE AT A HOSPITAL"  
2 = "2 HOSPICE AT A NURSING HOME"  
3 = "3 RESIDENTIAL HOSPICE"  
4 = "4 OTHER HOSPICE" ;
```

```
VALUE W200045W  
-7 = '-7 RF'  
-8 = '-8 DK'  
-1 = '-1 Inapplicable'  
-9 = '-9 Missing'  
1 = "1 DAYS"  
2 = "2 WEEKS"  
3 = "3 MONTHS"  
4 = "4 YEARS" ;
```

```
VALUE W200046W  
-7 = '-7 RF'  
-8 = '-8 DK'  
-1 = '-1 Inapplicable'  
-9 = '-9 Missing'  
1 = "1 AT SP'S HOME"  
2 = "2 IN A HOSPITAL"  
3 = "3 IN A NURSING HOME"  
4 = "4 IN A HOSPICE RESIDENCE"  
91 = "91 SOMEWHERE ELSE (SPECIFY)" ;
```

```
VALUE W200047W  
-7 = '-7 RF'  
-8 = '-8 DK'
```

## SAS ALGORITHM FOR DEMENTIA

```
-1 = '-1 Inapplicable'  
-9 = '-9 Missing'  
1 = "1 EVERY DAY"  
2 = "2 MOST DAYS"  
3 = "3 SOME DAYS"  
4 = "4 RARELY"  
5 = "5 NOT AT ALL" ;  
  
VALUE W200048W  
-7 = '-7 RF'  
-8 = '-8 DK'  
-1 = '-1 Inapplicable'  
-9 = '-9 Missing'  
1 = "1 LESS THAN WAS NEEDED"  
2 = "2 MORE THAN WAS NEEDED"  
3 = "3 ABOUT RIGHT AMOUNT" ;  
  
VALUE W200049W  
-7 = '-7 RF'  
-8 = '-8 DK'  
-1 = '-1 Inapplicable'  
-9 = '-9 Missing'  
1 = "1 YES"  
2 = "2 NO"  
3 = "3 DOES NOT APPLY/NO CARE IN LAST MONTH OF LIFE" ;  
  
VALUE W200050W  
-7 = '-7 RF'  
-8 = '-8 DK'  
-1 = '-1 Inapplicable'  
-9 = '-9 Missing'  
1 = "1 ALWAYS"  
2 = "2 USUALLY"  
3 = "3 SOMETIMES"  
4 = "4 NEVER"  
5 = "5 DOES NOT APPLY/NO CARE IN LAST MONTH OF LIFE" ;  
  
VALUE W200051W  
-7 = '-7 RF'  
-8 = '-8 DK'  
-1 = '-1 Inapplicable'  
-9 = '-9 Missing'  
1 = "1 EXCELLENT"  
2 = "2 VERY GOOD"  
3 = "3 GOOD"  
4 = "4 FAIR"  
5 = "5 POOR" ;  
  
VALUE W200052W  
-7 = '-7 RF'  
-8 = '-8 DK'  
-1 = '-1 Inapplicable'  
-9 = '-9 Missing'  
1 = "1 NOT AT ALL"  
2 = "2 SEVERAL DAYS"  
3 = "3 MORE THAN HALF THE DAYS"  
4 = "4 NEARLY EVERY DAY" ;
```

## SAS ALGORITHM FOR DEMENTIA

VALUE W200053W

-7 = '-7 RF'  
-8 = '-8 DK'  
-1 = '-1 Inapplicable'  
-9 = '-9 Missing'  
1 = "1 EVERY NIGHT (7 NIGHTS A WEEK)"  
2 = "2 MOST NIGHTS (5-6 NIGHTS A WEEK)"  
3 = "3 SOME NIGHTS (2-4 NIGHTS A WEEK)"  
4 = "4 RARELY (ONCE A WEEK OR LESS)"  
5 = "5 NEVER" ;

VALUE W200054W

-7 = '-7 RF'  
-8 = '-8 DK'  
-1 = '-1 Inapplicable'  
-9 = '-9 Missing'  
1 = "1 EVERY NIGHT (7 NIGHTS A WEEK)"  
2 = "2 MOST NIGHTS (5-6 NIGHTS A WEEK)"  
3 = "3 SOME NIGHTS (2-4 NIGHTS A WEEK)"  
4 = "4 RARELY (ONCE A WEEK OR LESS)"  
5 = "5 NEVER"  
7 = "7 DON'T WAKE UP/NOT A PROBLEM" ;

VALUE W200055W

-7 = '-7 RF'  
-8 = '-8 DK'  
-1 = '-1 Inapplicable'  
-9 = '-9 Missing'  
1 = "1 PRIVATE RESIDENCE"  
2 = "2 A GROUP HOME, BOARD AND CARE, OR SUPERVISED HOUSING"  
3 = "3 ASSISTED LIVING FACILITY OR CONTINUING CARE RETIREMENT COMMUNITY  
(CCRC)"  
4 = "4 RELIGIOUS GROUP QUARTERS"  
91 = "91 OTHER (SPECIFY)" ;

VALUE W200056W

-7 = '-7 RF'  
-8 = '-8 DK'  
-1 = '-1 Inapplicable'  
-9 = '-9 Missing'  
1 = "1 YES"  
2 = "2 NO"  
7 = "7 PLACE DOES NOT HAVE A NAME" ;

VALUE W200057W

-7 = '-7 RF'  
-8 = '-8 DK'  
-1 = '-1 Inapplicable'  
-9 = '-9 Missing'  
1 = "1 APARTMENT"  
2 = "2 ROOM"  
3 = "3 UNIT"  
4 = "4 SUITE"  
91 = "91 SOMETHING ELSE (SPECIFY)" ;

VALUE W200058W



## SAS ALGORITHM FOR DEMENTIA

```
-7 = '-7 RF'  
-8 = '-8 DK'  
-1 = '-1 Inapplicable'  
-9 = '-9 Missing'  
1 = "1 YES"  
2 = "2 NO, DIFFERENT PERSON"  
3 = "3 NO, NAME MISPELLED" ;
```

```
VALUE W200060W  
-7 = '-7 RF'  
-8 = '-8 DK'  
-1 = '-1 Inapplicable'  
-9 = '-9 Missing'  
1 = "1 PRIVATE RESIDENCE"  
2 = "2 A GROUP HOME, BOARD AND CARE, OR SUPERVISED HOUSING"  
3 = "3 ASSISTED LIVING FACILITY OR CONTINUING CARE RETIREMENT COMMUNITY  
(CCRC) "  
5 = "5 NURSING HOME"  
91 = "91 OTHER (SPECIFY)" ;
```

```
VALUE W200061W  
-7 = '-7 RF'  
-8 = '-8 DK'  
-1 = '-1 Inapplicable'  
-9 = '-9 Missing'  
1 = "1 SEPARATION OR DIVORCE"  
2 = "2 DECEASED"  
3 = "3 MOVED ELSEWHERE"  
5 = "5 LAST INTERVIEW INFORMATION INCORRECT"  
8 = "8 OTHER REASON" ;
```

```
VALUE W200067W  
-7 = '-7 RF'  
-8 = '-8 DK'  
-1 = '-1 Inapplicable'  
-9 = '-9 Missing'  
1 = "1 COMMON OR SHARED ENTRANCE"  
2 = "2 ENTRANCE DIRECTLY INTO HOME" ;
```

```
VALUE W200068W  
-7 = '-7 RF'  
-8 = '-8 DK'  
-1 = '-1 Inapplicable'  
-9 = '-9 Missing'  
1 = "1"  
2 = "2"  
3 = "3"  
4 = "4+" ;
```

```
VALUE W200069W  
-7 = '-7 RF'  
-8 = '-8 DK'  
-1 = '-1 Inapplicable'  
-9 = '-9 Missing'  
1 = "1 ALL ITEMS HERE"  
2 = "2 ADDED ONE OR MORE ITEMS" ;
```

## SAS ALGORITHM FOR DEMENTIA

```
VALUE W200070W
-7 = '-7 RF'
-8 = '-8 DK'
-1 = '-1 Inapplicable'
-9 = '-9 Missing'
 1 = "1 MORE THAN $500"
 2 = "2 LESS THAN $500"
 3 = "3 JUST ABOUT $500" ;

VALUE W200071W
-7 = '-7 RF'
-8 = '-8 DK'
-1 = '-1 Inapplicable'
-9 = '-9 Missing'
 1 = "1 MORE THAN $1,000"
 2 = "2 LESS THAN $1,000"
 3 = "3 JUST ABOUT $1,000" ;

VALUE W200072W
-7 = '-7 RF'
-8 = '-8 DK'
-1 = '-1 Inapplicable'
-9 = '-9 Missing'
 1 = "1 MORE THAN $100"
 2 = "2 LESS THAN $100"
 3 = "3 JUST ABOUT $100" ;

VALUE W200073W
-7 = '-7 RF'
-8 = '-8 DK'
-1 = '-1 Inapplicable'
-9 = '-9 Missing'
 1 = "1 YES"
 2 = "2 NO"
 7 = "7 YES, DOESNT KNOW HOW TO USE A COMPUTER" ;

VALUE W200074W
-7 = '-7 RF'
-8 = '-8 DK'
-1 = '-1 Inapplicable'
-9 = '-9 Missing'
 1 = "1 MOST DAYS"
 2 = "2 SOME DAYS"
 3 = "3 RARELY" ;

VALUE W200076W
-7 = '-7 RF'
-8 = '-8 DK'
-1 = '-1 Inapplicable'
-9 = '-9 Missing'
 1 = "1 YES"
 2 = "2 NO"
 7 = "7 DEAF" ;

VALUE W200077W
-7 = '-7 RF'
-8 = '-8 DK'
```

## SAS ALGORITHM FOR DEMENTIA

```
-1 = '-1 Inapplicable'  
-9 = '-9 Missing'  
1 = "1 YES"  
2 = "2 NO"  
7 = "7 BLIND" ;
```

VALUE W200078W

```
-7 = '-7 RF'  
-8 = '-8 DK'  
-1 = '-1 Inapplicable'  
-9 = '-9 Missing'  
1 = "1 EVERY DAY (7 DAYS A WEEK) "  
2 = "2 MOST DAYS (5-6 DAYS A WEEK) "  
3 = "3 SOME DAYS (2-4 DAYS A WEEK) "  
4 = "4 RARELY (ONCE A WEEK OR LESS) "  
5 = "5 NEVER" ;
```

VALUE W200080W

```
-7 = '-7 RF'  
-8 = '-8 DK'  
-1 = '-1 Inapplicable'  
-9 = '-9 Missing'  
1 = "1 YES, A CHANGE"  
2 = "2 NO, NO CHANGE"  
3 = "3 DEMENTIA/ALZHEIMER'S REPORTED BY PROXY" ;
```

VALUE W200081W

```
-7 = '-7 RF'  
-8 = '-8 DK'  
-1 = '-1 Inapplicable'  
-9 = '-9 Missing'  
1 = "1 SP HAS DEMENTIA/ALZHEIMER'S/ NOT ABLE"  
2 = "2 SP IS UNABLE TO SPEAK"  
3 = "3 SP IS UNABLE TO HEAR"  
4 = "4 SP REFUSED"  
5 = "5 PROXY REFUSED"  
6 = "6 SP NOT PRESENT"  
7 = "7 SP TOO ILL"  
8 = "8 SP LANGUAGE BARRIER"  
91 = "91 OTHER (SPECIFY)" ;
```

VALUE W200082W

```
-7 = '-7 RF'  
-8 = '-8 DK'  
-1 = '-1 Inapplicable'  
-9 = '-9 Missing'  
1 = "1 MUCH BETTER"  
2 = "2 BETTER"  
3 = "3 SAME"  
4 = "4 WORSE"  
5 = "5 MUCH WORSE" ;
```

VALUE W200083W

```
-7 = '-7 RF'  
-8 = '-8 DK'  
-1 = '-1 Inapplicable'  
-9 = '-9 Missing'
```

## SAS ALGORITHM FOR DEMENTIA

```
1 = "1 YES"
2 = "2 NO/DON'T KNOW" ;

VALUE W200084W
-7 = '-7 RF'
-8 = '-8 DK'
-1 = '-1 Inapplicable'
-9 = '-9 Missing'
1 = "1 CONTINUE WITH ACTIVITY"
2 = "2 SP REFUSES ACTIVITY" ;

VALUE W200085W
-1 = '-1 Inapplicable'
-9 = '-9 Missing'
1 = "Word[1]"
2 = "Word[2]"
3 = "Word[3]"
4 = "Word[4]"
5 = "Word[5]"
6 = "Word[6]"
7 = "Word[7]"
8 = "Word[8]"
9 = "Word[9]"
10 = "Word[10]"
91 = "91 NO WORDS REMEMBERED"
92 = "92 REFUSED" ;

VALUE W200086W
-7 = '-7 RF'
-8 = '-8 DK'
-1 = '-1 Inapplicable'
-9 = '-9 Missing'
1 = "1 DIFFICULTY HEARING ANY OF THE WORDS"
2 = "2 INTERRUPTION OCCURRED WHILE LIST WAS BEING READ"
91 = "91 OTHER PROBLEM (SPECIFY)"
92 = "92 NO PROBLEMS OCCURRED"
97 = "97 SP REFUSED WORD RECALL TASK" ;

VALUE W200087W
-1 = '-1 Inapplicable'
-9 = '-9 Missing'
1 = "1 SP ATTEMPTED CLOCK DRAWING"
2 = "2 SP DID NOT ATTEMPT CLOCK DRAWING"
97 = "3 SP REFUSED CLOCK DRAWING" ;

VALUE W200089W
-7 = '-7 RF'
-8 = '-8 DK'
-1 = '-1 Inapplicable'
-9 = '-9 Missing'
1 = "1 EVERY DAY (7 DAYS A WEEK)"
2 = "2 MOST DAYS (5-6 DAYS A WEEK)"
3 = "3 SOME DAYS (2-4 DAYS A WEEK)"
4 = "4 RARELY (ONCE A WEEK OR LESS)"
5 = "5 NEVER" ;

VALUE W200090W
```

## SAS ALGORITHM FOR DEMENTIA

```
-7 = '-7 RF'  
-8 = '-8 DK'  
-1 = '-1 Inapplicable'  
-9 = '-9 Missing'  
1 = "1 EVERY TIME"  
2 = "2 MOST TIMES"  
3 = "3 SOMETIMES"  
4 = "4 RARELY"  
5 = "5 NEVER" ;
```

VALUE W200092W

```
-7 = '-7 RF'  
-8 = '-8 DK'  
-1 = '-1 Inapplicable'  
-9 = '-9 Missing'  
1 = "1 MOST TIMES"  
2 = "2 SOMETIMES"  
3 = "3 RARELY"  
4 = "4 NEVER" ;
```

VALUE W200093W

```
-7 = '-7 RF'  
-8 = '-8 DK'  
-1 = '-1 Inapplicable'  
-9 = '-9 Missing'  
1 = "1 NONE"  
2 = "2 A LITTLE"  
3 = "3 SOME"  
4 = "4 A LOT" ;
```

VALUE W200094W

```
-7 = '-7 RF'  
-8 = '-8 DK'  
-1 = '-1 Inapplicable'  
-9 = '-9 Missing'  
1 = "1 MORE OFTEN"  
2 = "2 LESS OFTEN"  
3 = "3 ABOUT THE SAME" ;
```

VALUE W200095W

```
-7 = '-7 RF'  
-8 = '-8 DK'  
-1 = '-1 Inapplicable'  
-9 = '-9 Missing'  
1 = "1 JANUARY"  
2 = "2 FEBRUARY"  
3 = "3 MARCH"  
4 = "4 APRIL"  
5 = "5 MAY"  
6 = "6 JUNE"  
7 = "7 JULY"  
8 = "8 AUGUST"  
9 = "9 SEPTEMBER"  
10 = "10 OCTOBER"  
11 = "11 NOVEMBER"  
12 = "12 DECEMBER"  
90 = "90 LAST INTERVIEW INFORMATION INCORRECT" ;
```

## SAS ALGORITHM FOR DEMENTIA

```
VALUE W200096W
-7 = '-7 RF'
-8 = '-8 DK'
-1 = '-1 Inapplicable'
-9 = '-9 Missing'
1 = "1 YES"
2 = "2 NO"
90 = "90 LAST INTERVIEW INFORMATION INCORRECT" ;
```

```
VALUE W200097W
-7 = '-7 RF'
-8 = '-8 DK'
-1 = '-1 Inapplicable'
-9 = '-9 Missing'
1 = "1 YES"
2 = "2 NO / NO LONGER DRIVE" ;
```

```
VALUE W200098W
-7 = '-7 RF'
-8 = '-8 DK'
-1 = '-1 Inapplicable'
-9 = '-9 Missing'
1 = "1 YES"
2 = "2 NO"
7 = "7 NO, NO RAIN OR BAD WEATHER" ;
```

```
VALUE W200099W
-7 = '-7 RF'
-8 = '-8 DK'
-1 = '-1 Inapplicable'
-9 = '-9 Missing'
1 = "1 ALWAYS DID IT BY SELF"
2 = "2 ALWAYS DID IT TOGETHER WITH SOMEONE ELSE"
3 = "3 SOMEONE ELSE ALWAYS DID IT"
4 = "4 IT VARIED (MORE THAN ONE WAY)"
5 = "5 NOT DONE IN LAST MONTH" ;
```

```
VALUE W200102W
-7 = '-7 RF'
-8 = '-8 DK'
-1 = '-1 Inapplicable'
-9 = '-9 Missing'
1 = "1 MORE OFTEN"
2 = "2 LESS OFTEN"
3 = "3 SAME" ;
```

```
VALUE W200106W
-7 = '-7 RF'
-8 = '-8 DK'
-1 = '-1 Inapplicable'
-9 = '-9 Missing'
1 = "1 YES"
2 = "2 NO"
7 = "7 ALWAYS FED THROUGH IV OR TUBE" ;
```

```
VALUE W200107W
```

## SAS ALGORITHM FOR DEMENTIA

```
-7 = '-7 RF'  
-8 = '-8 DK'  
-1 = '-1 Inapplicable'  
-9 = '-9 Missing'  
1 = "1 EVERY TIME"  
2 = "2 MOST TIMES"  
3 = "3 SOMETIMES"  
4 = "4 RARELY" ;
```

VALUE W200109W

```
-7 = '-7 RF'  
-8 = '-8 DK'  
-1 = '-1 Inapplicable'  
-9 = '-9 Missing'  
1 = "1 SHOWERING"  
2 = "2 TAKING BATHS"  
3 = "3 WASHING UP SOME OTHER WAY" ;
```

VALUE W200114W

```
-7 = '-7 RF'  
-8 = '-8 DK'  
-1 = '-1 Inapplicable'  
-9 = '-9 Missing'  
1 = "1 VERY IMPORTANT"  
2 = "2 SOMEWHAT IMPORTANT"  
3 = "3 NOT SO IMPORTANT" ;
```

VALUE W200115W

```
-7 = '-7 RF'  
-8 = '-8 DK'  
-1 = '-1 Inapplicable'  
-9 = '-9 Missing'  
1 = "1 YES"  
2 = "2 NO"  
95 = "95 NO ACTIVITY LISTED" ;
```

VALUE W200116W

```
-7 = '-7 RF'  
-8 = '-8 DK'  
-1 = '-1 Inapplicable'  
-9 = '-9 Missing'  
1 = "1 LEFT"  
2 = "2 RIGHT"  
3 = "3 BOTH" ;
```

VALUE W200117W

```
-7 = '-7 RF'  
-8 = '-8 DK'  
-1 = '-1 Inapplicable'  
-9 = '-9 Missing'  
1 = "1 LEFT SIDE"  
2 = "2 RIGHT SIDE"  
3 = "3 BOTH SIDES" ;
```

VALUE W200118W

```
-7 = '-7 RF'
```

## SAS ALGORITHM FOR DEMENTIA

```
-8 = '-8 DK'  
-1 = '-1 Inapplicable'  
-9 = '-9 Missing'  
1 = "1 ONE SIDE"  
2 = "2 BOTH SIDES" ;
```

```
VALUE W200119W
```

```
-7 = '-7 RF'  
-8 = '-8 DK'  
-1 = '-1 Inapplicable'  
-9 = '-9 Missing'  
1 = "1 RECEIVE ALL TREATMENTS"  
2 = "2 STOP/REJECT ALL TREATMENTS" ;
```

```
VALUE W200120W
```

```
-7 = '-7 RF'  
-8 = '-8 DK'  
-1 = '-1 Inapplicable'  
-9 = '-9 Missing'  
1 = "1 LIVING IN THEIR OWN HOME WITH HELP FROM FRIENDS AND FAMILY"  
2 = "2 LIVING IN THEIR OWN HOME WITH HELP FROM SOMEONE PAID TO COME IN"  
3 = "3 LIVING WITH AN ADULT CHILD"  
4 = "4 LIVING IN AN ASSISTED LIVING FACILITY OR CONTINUING CARE
```

```
RESIDENCE"
```

```
5 = "5 LIVING IN A NURSING HOME" ;
```

```
VALUE W200121W
```

```
-7 = '-7 RF'  
-8 = '-8 DK'  
-1 = '-1 Inapplicable'  
-9 = '-9 Missing'  
1 = "1 YES"  
2 = "2 NO"  
3 = "3 DOESNT HAVE ANY MONEY TO PAY A CAREGIVER"  
4 = "4 WOULD NOT USE A PAID CAREGIVER" ;
```

```
VALUE W200122W
```

```
-7 = '-7 RF'  
-8 = '-8 DK'  
-1 = '-1 Inapplicable'  
-9 = '-9 Missing'  
1 = "1 MAKE DECISIONS WITHOUT MUCH ADVICE FROM THEM"  
2 = "2 GET THEIR ADVICE AND THEN MAKE DECISIONS"  
3 = "3 MAKE DECISIONS TOGETHER"  
4 = "4 LEAVE DECISIONS UP TO THEM" ;
```

```
VALUE W200123W
```

```
-7 = '-7 RF'  
-8 = '-8 DK'  
-1 = '-1 Inapplicable'  
-9 = '-9 Missing'  
1 = "1 HANDLE MOSTLY BY SELF"  
2 = "2 HANDLE TOGETHER WITH FAMILY OR CLOSE FRIENDS"  
3 = "3 FAMILY OR CLOSE FRIENDS MOSTLY HANDLE THESE THINGS"  
4 = "4 IT VARIES" ;
```

```
VALUE W200124W
```



## SAS ALGORITHM FOR DEMENTIA

```
-7 = '-7 RF'  
-8 = '-8 DK'  
-1 = '-1 Inapplicable'  
-9 = '-9 Missing'  
1 = "1 NEVER"  
2 = "2 RARELY"  
3 = "3 SOMETIMES"  
4 = "4 OFTEN" ;
```

VALUE W200126W

```
-7 = '-7 RF'  
-8 = '-8 DK'  
-1 = '-1 Inapplicable'  
-9 = '-9 Missing'  
1 = "1 AGREE A LOT"  
2 = "2 AGREE A LITTLE"  
3 = "3 DO NOT AGREE" ;
```

VALUE W200127W

```
-7 = '-7 RF'  
-8 = '-8 DK'  
-1 = '-1 Inapplicable'  
-9 = '-9 Missing'  
1 = "1 AGREE A LOT"  
2 = "2 AGREE A LITTLE"  
3 = "3 AGREE NOT AT ALL" ;
```

VALUE W200129W

```
-7 = '-7 RF'  
-8 = '-8 DK'  
-1 = '-1 Inapplicable'  
-9 = '-9 Missing'  
1 = "1 less than $1,000,"  
2 = "2 $1,000 to less than $2,000,"  
3 = "3 $2,000 to less than $3,000,"  
4 = "4 $3,000 to less than $5,000, or"  
5 = "5 $5,000 or more?" ;
```

VALUE W200131W

```
-7 = '-7 RF'  
-8 = '-8 DK'  
-1 = '-1 Inapplicable'  
-9 = '-9 Missing'  
1 = "1 YES"  
2 = "2 NO"  
3 = "3 RETIRED/DON'T WORK ANYMORE" ;
```

VALUE W200132W

```
-7 = '-7 RF'  
-8 = '-8 DK'  
-1 = '-1 Inapplicable'  
-9 = '-9 Missing'  
1 = "1 EVERY WEEK"  
2 = "2 EVERY TWO WEEKS"  
3 = "3 TWO TIMES A MONTH"  
4 = "4 ONCE A MONTH"  
5 = "5 DAILY"
```

## SAS ALGORITHM FOR DEMENTIA

```
91 = "91 OTHER SCHEDULE (SPECIFY)" ;

VALUE W200133W
-7 = '-7 RF'
-8 = '-8 DK'
-1 = '-1 Inapplicable'
-9 = '-9 Missing'
1 = "1 OWN"
2 = "2 RENT"
3 = "3 SOME OTHER ARRANGEMENT" ;

VALUE W200134W
-7 = '-7 RF'
-8 = '-8 DK'
-1 = '-1 Inapplicable'
-9 = '-9 Missing'
1 = "1 PAID OFF"
2 = "2 STILL MAKE PAYMENTS"
3 = "3 REVERSE MORTGAGE" ;

VALUE W200135W
-7 = '-7 RF'
-8 = '-8 DK'
-1 = '-1 Inapplicable'
-9 = '-9 Missing'
1 = "1 less than $250,"
2 = "2 $250-$499,"
3 = "3 $500-$999, or"
4 = "4 $1,000 or more?" ;

VALUE W500135W
-7 = '-7 RF'
-8 = '-8 DK'
-1 = '-1 Inapplicable'
-9 = '-9 Missing'
1 = "1 less than $250"
2 = "2 $250 to less than $500"
3 = "3 $500 to less than $1,000"
4 = "4 $1,000 to less than $3,000"
5 = "5 $3,000 to less than $5,000"
6 = "6 $5,000 or more?" ;

VALUE W200136W
-7 = '-7 RF'
-8 = '-8 DK'
-1 = '-1 Inapplicable'
-9 = '-9 Missing'
1 = "1 5 YEARS"
2 = "2 10 YEARS"
3 = "3 LONGER THAN 10 YEARS" ;

VALUE W200137W
-7 = '-7 RF'
-8 = '-8 DK'
-1 = '-1 Inapplicable'
-9 = '-9 Missing'
1 = "1 less than $50,000,"
2 = "2 between $50,000 and $100,000, or"
3 = "3 over $100,000?" ;
```

## SAS ALGORITHM FOR DEMENTIA

VALUE W200138W

-7 = '-7 RF'  
-8 = '-8 DK'  
-1 = '-1 Inapplicable'  
-9 = '-9 Missing'  
1 = "1 less than \$50,000,"  
2 = "2 \$50,000-\$74,999,"  
3 = "3 \$75,000-\$99,999,"  
4 = "4 \$100,000-\$199,999,"  
5 = "5 \$200,000-\$299,999,"  
6 = "6 \$300,000-\$499,999,"  
7 = "7 \$500,000-\$749,999, or"  
8 = "8 \$750,000 or more?" ;

VALUE W200139W

-7 = '-7 RF'  
-8 = '-8 DK'  
-1 = '-1 Inapplicable'  
-9 = '-9 Missing'  
1 = "1 PAY OFF BALANCE"  
2 = "2 PAY MINIMUM"  
3 = "3 PAY MORE THAN MINIMUM, BUT NOT ENTIRE BALANCE"  
4 = "4 DON'T HAVE ANY CREDIT CARDS" ;

VALUE W200140W

-7 = '-7 RF'  
-8 = '-8 DK'  
-1 = '-1 Inapplicable'  
-9 = '-9 Missing'  
1 = "1 less than \$1,000,"  
2 = "2 \$1,000 - \$1,999,"  
3 = "3 \$2,000 - \$3,999,"  
4 = "4 \$4,000 - \$5,999,"  
5 = "5 \$6,000 - \$9,999,"  
6 = "6 \$10,000 - \$19,999, or"  
7 = "7 \$20,000 or more?" ;

VALUE W200141W

-7 = '-7 RF'  
-8 = '-8 DK'  
-1 = '-1 Inapplicable'  
-9 = '-9 Missing'  
1 = "1 MOST"  
2 = "2 SOME"  
3 = "3 A LITTLE" ;

VALUE W200142W

-7 = '-7 RF'  
-8 = '-8 DK'  
-1 = '-1 Inapplicable'  
-9 = '-9 Missing'  
1 = "1 less than \$500,"  
2 = "2 \$500 - \$999,"  
3 = "3 \$1,000 - \$1,999,"  
4 = "4 \$2,000 - \$3,999,"  
5 = "5 \$4,000 - \$5,999,"

## SAS ALGORITHM FOR DEMENTIA

```
6 = "6 $6,000 - $9,999,"  
7 = "7 $10,000 - $19,999, or"  
8 = "8 $20,000 or more?" ;
```

```
VALUE W200146W  
-7 = '-7 RF'  
-8 = '-8 DK'  
-1 = '-1 Inapplicable'  
-9 = '-9 Missing'  
1 = "1 NEARLY EVERY DAY"  
2 = "2 MORE THAN HALF THE DAYS"  
3 = "3 SEVERAL DAYS (LESS THAN HALF)"  
4 = "4 A FEW DAYS" ;
```

```
VALUE W200147W  
-7 = '-7 RF'  
-8 = '-8 DK'  
-1 = '-1 Inapplicable'  
-9 = '-9 Missing'  
1 = "1 INCLUDED"  
2 = "2 EXTRA CHARGE" ;
```

```
VALUE W200148W  
-7 = '-7 RF'  
-8 = '-8 DK'  
-1 = '-1 Inapplicable'  
-9 = '-9 Missing'  
1 = "1 Yes" ;
```

```
VALUE F200006W  
-7 = '-7 RF'  
-8 = '-8 DK'  
-1 = '-1 Inapplicable'  
-9 = '-9 Missing'  
1 = "1 FREE STANDING NURSING HOME"  
2 = "2 FREE STANDING ASSISTED LIVING FACILITY"  
3 = "3 NURSING HOME AND ASSISTED LIVING FACILITY"  
4 = "4 CONTINUING CARE RETIREMENT COMMUNITY (CCRC)"  
5 = "5 ADULT FAMILY CARE HOME"  
6 = "6 GROUP HOME"  
7 = "7 BOARD AND CARE HOME"  
8 = "8 RETIREMENT COMMUNITY OR SENIOR HOUSING (NOT CCRC)"  
91 = "91 OTHER (SPECIFY)" ;
```

```
VALUE F200007W  
-7 = '-7 RF'  
-8 = '-8 DK'  
-1 = '-1 Inapplicable'  
-9 = '-9 Missing'  
1 = "1 YES"  
2 = "2 NO" ;
```

```
VALUE F200008W  
-7 = '-7 RF'  
-8 = '-8 DK'  
-1 = '-1 Inapplicable'  
-9 = '-9 Missing'
```

## SAS ALGORITHM FOR DEMENTIA

```
1 = "1 INDEPENDENT LIVING"  
2 = "2 ASSISTED LIVING"  
3 = "3 SPECIAL CARE, MEMORY CARE, OR ALZHEIMER'S UNIT"  
4 = "4 NURSING HOME"  
91 = "91 OTHER (SPECIFY)" ;  
  
VALUE F200009W  
-7 = '-7 RF'  
-8 = '-8 DK'  
-1 = '-1 Inapplicable'  
-9 = '-9 Missing'  
1 = "1 ASSISTED LIVING"  
2 = "2 NURSING HOME" ;  
  
VALUE F200011W  
-7 = '-7 RF'  
-8 = '-8 DK'  
-1 = '-1 Inapplicable'  
-9 = '-9 Missing'  
1 = "1 YES, SERVICE PROVIDED AS PART OF PACKAGE"  
2 = "2 YES, SERVICE PROVIDED AT AN EXTRA CHARGE"  
3 = "3 NO, SERVICE NOT PROVIDED" ;  
  
VALUE F200012W  
-7 = '-7 RF'  
-8 = '-8 DK'  
-1 = '-1 Inapplicable'  
-9 = '-9 Missing'  
1 = "1 SP/FAMILY"  
2 = "2 SOCIAL SECURITY/SSI"  
3 = "3 MEDICAID"  
4 = "4 MEDICARE"  
5 = "5 OTHER SOURCE" ;  
  
VALUE I200002W  
-7 = '-7 RF'  
-8 = '-8 DK'  
-1 = '-1 Inapplicable'  
-9 = '-9 Missing'  
1 = "1 Yes"  
2 = "2 No" ;  
  
VALUE I200003W  
-7 = '-7 RF'  
-8 = '-8 DK'  
-1 = '-1 Inapplicable'  
-9 = '-9 Missing'  
1 = "1 English"  
2 = "2 Spanish"  
3 = "3 Other (specify)" ;  
  
VALUE I200005W  
-7 = '-7 RF'  
-8 = '-8 DK'  
-1 = '-1 Inapplicable'  
-9 = '-9 Missing'  
1 = "1 Friendly and interested"
```

## SAS ALGORITHM FOR DEMENTIA

```
2 = "2 Cooperative but not particularly interested"  
3 = "3 Impatient and restless"  
4 = "4 Hostile" ;
```

```
VALUE I200006W  
-7 = '-7 RF'  
-8 = '-8 DK'  
-1 = '-1 Inapplicable'  
-9 = '-9 Missing'  
1 = "1 Good"  
2 = "2 Fair"  
3 = "3 Poor" ;
```

```
VALUE I200008W  
-7 = '-7 RF'  
-8 = '-8 DK'  
-1 = '-1 Inapplicable'  
-9 = '-9 Missing'  
1 = "1 All of the time"  
2 = "2 Most of the time"  
3 = "3 Some of the time"  
4 = "4 Only for the cognition and/or performance parts"  
5 = "5 None of the time" ;
```

```
VALUE I200010W  
-7 = '-7 RF'  
-8 = '-8 DK'  
-1 = '-1 Inapplicable'  
-9 = '-9 Missing'  
1 = "1 Yes"  
2 = "2 No"  
3 = "3 Interview was conducted by telephone" ;
```

```
VALUE I200012W  
-7 = '-7 RF'  
-8 = '-8 DK'  
-1 = '-1 Inapplicable'  
-9 = '-9 Missing'  
1 = "1 Yes"  
2 = "2 No"  
3 = "3 Not Administered" ;
```

```
VALUE I200013W  
-7 = '-7 RF'  
-8 = '-8 DK'  
-1 = '-1 Inapplicable'  
-9 = '-9 Missing'  
1 = "1 Yes"  
2 = "2 No" ;
```

```
VALUE I200016W  
-7 = '-7 RF'  
-8 = '-8 DK'  
-1 = '-1 Inapplicable'  
-9 = '-9 Missing'  
1 = "1 Yes"  
2 = "2 No"
```

## SAS ALGORITHM FOR DEMENTIA

```
3 = "3 Entire interview conducted by telephone" ;

VALUE I200017W
-7 = '-7 RF'
-8 = '-8 DK'
-1 = '-1 Inapplicable'
-9 = '-9 Missing'
1 = "1 Not at all cluttered"
2 = "2 Somewhat cluttered"
3 = "3 Very cluttered"
4 = "4 Could not see other rooms" ;

VALUE I200018W
-7 = '-7 RF'
-8 = '-8 DK'
-1 = '-1 Inapplicable'
-9 = '-9 Missing'
1 = "1 None"
2 = "2 A little"
3 = "3 Some"
4 = "4 A lot"
5 = "5 Could not observe" ;

VALUE I200019W
-7 = '-7 RF'
-8 = '-8 DK'
-1 = '-1 Inapplicable'
-9 = '-9 Missing'
1 = "1 Yes"
2 = "2 No"
7 = "7 Could not observe" ;

/* DERIVED VARIABLE FORMATS */
VALUE LVGARRG
1 = '1 Alone'
2 = '2 With spouse/partner only (spouse/partner in household)'
3 = '3 With spouse/partner and with others'
4 = '4 With others only'
-1 = '-1 Inapplicable'
-9 = '-9 Missing';

VALUE DOUTSFDF
8 = '8 Not done in last month'
1 = '1 Did not do by self in last month'
2 = '2 Did by self in last month/No Difficulty'
3 = '3 Did by self in last month/Difficulty'
4 = '4 DKRF Did by self in last month/No Difficulty'
5 = '5 DKRF Did by self in last month/Difficulty'
6 = '6 Did by self in last month/DKRF Difficulty'
7 = '7 DKRF Did by self in last month/DKRF Difficulty'
-1 = '-1 Inapplicable'
-9 = '-9 Missing';

VALUE DOUTDEVI
8 = '8 Not done in last month'
1 = '1 No use of devices to go outside in last month'
```

## SAS ALGORITHM FOR DEMENTIA

```
2 = '2 Use of devices to go outside in last month'  
3 = '3 DKRF If used devices to go outside in last month'  
4 = '4 DKRF If used devices in last month'  
-1 = '-1 Inapplicable'  
-9 = '-9 Missing';
```

### VALUE DOUTHELP

```
8 = '8 Not done in last month'  
1 = '1 No help to go outside in last month'  
2 = '2 Had help to go outside in last month'  
3 = '3 DKRF If had help to go outside in last month'  
-1 = '-1 Inapplicable'  
-9 = '-9 Missing';
```

### VALUE DINSDSFD

```
8 = '8 Not done in last month'  
1 = '1 Did not do by self in last month'  
2 = '2 Did by self in last month/No Difficulty'  
3 = '3 Did by self in last month/Difficulty'  
4 = '4 DKRF Did by self in last month/No Difficulty'  
5 = '5 DKRF Did by self in last month/Difficulty'  
6 = '6 Did by self in last month/DKRF Difficulty'  
7 = '7 DKRF Did by self in last month/DKRF Difficulty'  
-1 = '-1 Inapplicable'  
-9 = '-9 Missing';
```

### VALUE DINSDDDEV

```
8 = '8 Not done in last month'  
1 = '1 No use of devices inside in last month'  
2 = '2 Use of devices inside in last month'  
3 = '3 DKRF If used devices inside in last month'  
4 = '4 DKRF On use of devices'  
-1 = '-1 Inapplicable'  
-9 = '-9 Missing';
```

### VALUE dinsdhlp

```
8 = '8 Not done in last month'  
1 = '1 No help to go around inside in last month'  
2 = '2 Had help to go around inside in last month'  
3 = '3 DKRF If had help to go around inside in last month'  
-1 = '-1 Inapplicable'  
-9 = '-9 Missing';
```

### VALUE dbedsfd

```
1 = '1 Did not do by self in last month'  
2 = '2 Did by self in last month/No Difficulty'  
3 = '3 Did by self in last month/Difficulty'  
4 = '4 DKRF Did by self in last month/No Difficulty'  
5 = '5 DKRF Did by self in last month/Difficulty'  
6 = '6 Did by self in last month/DKRF Difficulty'  
7 = '7 DKRF Did by self in last month/DKRF Difficulty'  
-1 = '-1 Inapplicable'  
-9 = '-9 Missing';
```

### VALUE dbeddevi

```
1 = '1 No use of cane or walker to get out of bed in last month'  
2 = '2 Use of cane or walker to get out of bed in last month'
```



## SAS ALGORITHM FOR DEMENTIA

```
3 = '3 DKRF If Used cane or walker to get out of bed in last month'  
4 = '4 DKRF If used cane or walker in last month'  
-1 = '-1 Inapplicable'  
-9 = '-9 Missing';
```

### VALUE dbedhelp

```
1 = '1 No help to get out of bed in last month'  
2 = '2 Had help to get out of bed in last month'  
3 = '3 DKRF If had help to get out of bed in last month'  
-1 = '-1 Inapplicable'  
-9 = '-9 Missing';
```

### VALUE dlaunbfd

```
1 = '1 Did not do by self in last month'  
2 = '2 Did by self in last month/No Difficulty'  
3 = '3 Did by self in last month/Difficulty'  
4 = '4 DKRF Did by self in last month/No Difficulty'  
5 = '5 DKRF Did by self in last month/Difficulty'  
6 = '6 Did by self in last month/DKRF Difficulty'  
7 = '7 DKRF Did by self in last month/DKRF Difficulty'  
8 = '8 Not done in last month'  
-1 = '-1 Inapplicable'  
-9 = '-9 Missing';
```

### VALUE dlaunrea

```
1= '1 Health/functioning reason only'  
2= '2 Other reason only'  
3= '3 Both health/functioning and other'  
4= '4 Service/someone from the place SP lives'  
-7 = '-7 RF'  
-8 = '-8 DK'  
-1 = '-1 Inapplicable'  
-9 = '-9 Missing';
```

### VALUE dshopsfd

```
1 = '1 Did not do by self in last month'  
2 = '2 Did by self in last month/No Difficulty'  
3 = '3 Did by self in last month/Difficulty'  
4 = '4 DKRF Did by self in last month/No Difficulty'  
5 = '5 DKRF Did by self in last month/Difficulty'  
6 = '6 Did by self in last month/DKRF Difficulty'  
7 = '7 DKRF Did by self in last month/DKRF Difficulty'  
8 = '8 Not done in last month'  
-1 = '-1 Inapplicable'  
-9 = '-9 Missing';
```

### VALUE dshoprea

```
1= '1 Health/functioning reason only'  
2= '2 Other reason only'  
3= '3 Both health/functioning and other'  
4= '4 Service/someone from the place SP lives'  
-7 = '-7 RF'  
-8 = '-8 DK'  
-1 = '-1 Inapplicable'
```

## SAS ALGORITHM FOR DEMENTIA

```
-9 = '-9 Missing';
```

### VALUE dmealsfd

```
1 = '1 Did not do by self in last month'  
2 = '2 Did by self in last month/No Difficulty'  
3 = '3 Did by self in last month/Difficulty'  
4 = '4 DKRF Did by self in last month/No Difficulty'  
5 = '5 DKRF Did by self in last month/Difficulty'  
6 = '6 Did by self in last month/DKRF Difficulty'  
7 = '7 DKRF Did by self in last month/DKRF Difficulty'  
8 = '8 Not done in last month'  
-1 = '-1 Inapplicable'  
-9 = '-9 Missing';
```

### VALUE dmealrea

```
1= '1 Health/functioning reason only'  
2= '2 Other reason only'  
3= '3 Both health/functioning and other'  
4= '4 Service/someone from the place SP lives'  
-7 = '-7 RF'  
-8 = '-8 DK'  
-1 = '-1 Inapplicable'  
-9 = '-9 Missing';
```

### VALUE dbanksfd

```
1 = '1 Did not do by self in last month'  
2 = '2 Did by self in last month/No Difficulty'  
3 = '3 Did by self in last month/Difficulty'  
4 = '4 DKRF Did by self in last month/No Difficulty'  
5 = '5 DKRF Did by self in last month/Difficulty'  
6 = '6 Did by self in last month/DKRF Difficulty'  
7 = '7 DKRF Did by self in last month/DKRF Difficulty'  
8 = '8 Not done in last month'  
-7 = '-7 RF'  
-8 = '-8 DK'  
-1 = '-1 Inapplicable'  
-9 = '-9 Missing';
```

### VALUE dbankrea

```
1= '1 Health/functioning reason only'  
2= '2 Other reason only'  
3= '3 Both health/functioning and other'  
4= '4 Service/someone from the place SP lives'  
-7 = '-7 RF'  
-8 = '-8 DK'  
-1 = '-1 Inapplicable'  
-9 = '-9 Missing';
```

### VALUE deatdevi

```
1 = '1 No use of adapted utensils in last month'  
2 = '2 Use of adapted utensils in last month'  
8 = '8 Not done in last month'  
3 = '3 DKRF If used adapted utensils in last month'  
-1 = '-1 Inapplicable'  
-9 = '-9 Missing';
```

### VALUE deathelp

## SAS ALGORITHM FOR DEMENTIA

```
1 = '1 No help eating in last month'  
2 = '2 Had help eating in last month'  
3 = '3 DKRF If had help eating in last month'  
8 = '8 Not done in last month'  
-1 = '-1 Inapplicable'  
-9 = '-9 Missing';
```

### VALUE deatsfdf

```
1 = '1 Did not do by self in last month'  
2 = '2 No Difficulty by self (and when using utensils)'  
3 = '3 Difficulty by self (and when using utensils)'  
6 = '6 Did by self in last month/DKRF Difficulty'  
7 = '7 DKRF Did by self in last month/DKRF Difficulty'  
8 = '8 Not done in last month'  
-1 = '-1 Inapplicable'  
-9 = '-9 Missing';
```

### VALUE dbathdev

```
1 = '1 No use of grab bars or bath seats in last month'  
2 = '2 Use of grab bars or bath seats in last month'  
3 = '3 DKRF If use of grab bars or bath seats in last month'  
4 = '4 DKRF If had grab bars or bath seats in last month'  
9 = '9 No bars/seats/shower/tub or washes up other way'  
-1 = '-1 Inapplicable'  
-9 = '-9 Missing';
```

### VALUE dbathhel

```
1 = '1 No help bathing in last month'  
2 = '2 Had help bathing in last month'  
3 = '3 DKRF If had help bathing in last month'  
-1 = '-1 Inapplicable'  
-9 = '-9 Missing';
```

### VALUE dbathsfd

```
1 = '1 Did not do by self in last month'  
2 = '2 No Difficulty by self (and when using grab bars or tub seat)'  
3 = '3 Difficulty by self (and when using grab bars or tub seat)'  
6 = '6 Did by self in last month/DKRF Difficulty'  
7 = '7 DKRF Did by self in last month/DKRF Difficulty'  
-1 = '-1 Inapplicable'  
-9 = '-9 Missing';
```

### VALUE dtoildev

```
1 = '1 No use of toileting devices in last month'  
2 = '2 Use of toileting devices in last month'  
3 = '3 DKRF of some and no use of other toileting devices in last month'  
-1 = '-1 Inapplicable'  
-9 = '-9 Missing';
```

### VALUE dtoilhel

```
1 = '1 No help toileting in last month'  
2 = '2 Had help toileting in last month'  
3 = '3 DKRF If had help toileting in last month'  
-1 = '-1 Inapplicable'  
-9 = '-9 Missing';
```

### VALUE dtoolsfd

## SAS ALGORITHM FOR DEMENTIA

```
1 = '1 Did not do by self in last month'  
2 = '2 No Difficulty by self (and when using toileting devices)'  
3 = '3 Difficulty by self (and when using toileting devices)'  
6 = '6 Did by self in last month/DKRF Difficulty'  
7 = '7 DKRF Did by self in last month/DKRF Difficulty'  
-1 = '-1 Inapplicable'  
-9 = '-9 Missing';
```

### VALUE ddresdev

```
8 = '8 Not done in last month'  
9 = '9 DKRF If dressed in last month'  
2 = '2 Use of dressing devices in last month'  
1 = '1 No use of dressing devices in last month'  
3 = '3 DKRF If use of dressing devices in last month'  
-1 = '-1 Inapplicable'  
-9 = '-9 Missing';
```

### VALUE ddreshel

```
8 = '8 Not done in last month'  
9 = '9 DKRF If dressed in last month'  
1 = '1 No help dressing in last month'  
2 = '2 Had help dressing in last month'  
3 = '3 DKRF If had help dressing in last month'  
-1 = '-1 Inapplicable'  
-9 = '-9 Missing';
```

### VALUE ddressfd

```
1 = '1 Did not do by self in last month'  
2 = '2 No Difficulty by self (and when using dressing devices)'  
3 = '3 Difficulty by self (and when using dressing devices)'  
6 = '6 Did by self in last month/DKRF Difficulty'  
7 = '7 DKRF Did by self in last month/DKRF Difficulty'  
8 = '8 Not done in last month'  
-1 = '-1 Inapplicable'  
-9 = '-9 Missing';
```

### VALUE dmedssfd

```
1 = '1 Did not do by self in last month'  
2 = '2 Did by self in last month/No Difficulty'  
3 = '3 Did by self in last month/Difficulty'  
4 = '4 DKRF Did by self in last month/No Difficulty'  
5 = '5 DKRF Did by self in last month/Difficulty'  
6 = '6 Did by self in last month/DKRF Difficulty'  
7 = '7 DKRF Did by self in last month/DKRF Difficulty'  
8 = '8 Not done in last month'  
9 = '9 No or DKRF if medications taken in last month'  
-1 = '-1 Inapplicable'  
-9 = '-9 Missing';
```

### VALUE dmedsrea

```
1 = '1 Health/functioning reason only'  
2 = '2 Other reason only'  
3 = '3 Both heath/functioning and other'  
4 = '4 Service/someone from the place SP lives'  
-7 = '-7 RF'  
-8 = '-8 DK'  
-1 = '-1 Inapplicable'  
-9 = '-9 Missing';
```

## SAS ALGORITHM FOR DEMENTIA

```
VALUE dmarstat
  1 = '1 Married'
  2 = '2 Living with a partner'
  3 = '3 Separated'
  4 = '4 Divorced'
  5 = '5 Widowed'
  6 = '6 Never married'
  -7 = '-7 RF'
  -8 = '-8 DK'
  -1 = '-1 Inapplicable'
  -9 = '-9 Missing';
VALUE DSPSAGEC
  -7 = '-7 RF'
  -8 = '-8 DK'
  -1 = '-1 Inapplicable'
  -9 = '-9 Missing'
  1 = " 1 UNDER 50"
  2 = " 2 50-54"
  3 = " 3 55-59"
  4 = " 4 60-64"
  5 = " 5 65-69"
  6 = " 6 70-74"
  7 = " 7 75-79"
  8 = " 8 80-84"
  9 = " 9 85-89"
  10 = "10 90 +" ;

VALUE dresid
  -1 = '-1 Inapplicable'
  1 = '1 Community '
  2 = '2 Residential Care Resident not nursing home (SP interview
complete)'
  3 = '3 Residential Care Resident not nursing home (FQ only)'
  4 = '4 Nursing Home Resident';
VALUE f_dresid
  -1 = '-1 Inapplicable'
  1 = '1 Community '
  2 = '2 Residential care not nursing home (SP interview)'
  3 = '3 Residential care not nursing home (FQ only)'
  4 = '4 Nursing home (SP interview)'
  5 = '5 Nursing home (FQ only)'
  6 = '6 Deceased'
  7 = '7 Residential care not nursing home in R1 and R5 (FQ only)'
  8 = '8 Nursing home in R1 and R5 (FQ only)' ;
VALUE f2dresid
  -1='-1 Inapplicable'
  1 = '1 Community '
  2 = '2 Residential care not nursing home (SP interview)'
  3 = '3 Residential care not nursing home (FQ only)'
  4 = '4 Nursing home (SP interview)'
  5 = '5 Nursing home (FQ only)'
  6 = '6 Deceased'
  7 = '7 Residential care not nursing home in R1 and R2 (FQ only)'
  8 = '8 Nursing home in R1 and R2 (FQ only)' ;
VALUE f3dresid
  -1='-1 Inapplicable'
```

## SAS ALGORITHM FOR DEMENTIA

```
      1 = '1 Community '
      2 = '2 Residential care not nursing home (SP interview) '
      3 = '3 Residential care not nursing home (FQ only) '
      4 = '4 Nursing home (SP interview) '
      5 = '5 Nursing home (FQ only) '
      6 = '6 Deceased'
      7 = '7 Residential care not nursing home in R1 and R3 (FQ only) '
      8 = '8 Nursing home in R1 and R3 (FQ only) ' ;
VALUE f4dresid
      -1='-1 Inapplicable'
      1 = '1 Community '
      2 = '2 Residential care not nursing home (SP interview) '
      3 = '3 Residential care not nursing home (FQ only) '
      4 = '4 Nursing home (SP interview) '
      5 = '5 Nursing home (FQ only) '
      6 = '6 Deceased'
      7 = '7 Residential care not nursing home in R1 and R4 (FQ only) '
      8 = '8 Nursing home in R1 and R4 (FQ only) ' ;

VALUE QUARTILE
-9="-9 Missing"
-1="-1 Inapplicable";

VALUE SPPB
-9="-9 Missing"
-1="-1 Inapplicable";

VALUE DCLCKSC
  0 = "0 Not recognizable as a clock"
  1 = "1 Severely distorted depiction of a clock"
  2 = "2 Moderately distorted depiction of a clock"
  3 = "3 Mildly distorted depiction of a clock"
  4 = "4 Reasonably accurate depiction of a clock"
  5 = "5 Accurate depiction of a clock (circular or square)"
-7 = "-7 SP refused to draw clock"
-8 = "-8 DK"
-1 = "-1 Inapplicable"
-2 = "-2 Proxy says cannot ask SP"
-3 = "-3 Proxy says can ask SP but SP unable to answer"
-4 = "-4 SP did not attempt to draw clock"
-9 = "-9 Missing";

VALUE DCLCKCL
  1 = '1 Very clear'
  2 = '2 Somewhat clear'
  3 = '3 Somewhat unclear'
  4 = '4 Very unclear'
  5 = '5 Blank'
-7 = '-7 SP refused to draw clock'
-8 = '-8 DK'
-1 = '-1 Inapplicable'
-2 = '-2 Proxy says cannot ask SP'
-3 = '-3 Proxy says can ask SP but SP unable to answer'
-4 = '-4 SP did not attempt to draw clock'
-9 = '-9 Missing';
```

## SAS ALGORITHM FOR DEMENTIA

### VALUE RESULT

```
-9='-9: MISSING'  
1='1: COMPLETED W RESULTS'  
2='2: COMPLETED MISSING RESULTS'  
3='3: ATTEMPTED W RESULTS'  
4='4: ATTEMPTED MISSING RESULTS'  
5='5: NOT ATTEMPTED SAFETY'  
6='6: NOT ATTEMPTED NOT SAFETY REASON'  
7='7: NO CHAIR/NO SPACE'  
9='9: NOT ATTEMPTED/MISSING';
```

### VALUE RESULT\_SCH

```
-9='-9: MISSING'  
1='1: COMPLETED W/OUT ARMS'  
2='2: COMPLETED W ARMS'  
3='3: ATTEMPTED W RESULTS'  
4='4: ATTEMPTED MISSING RESULTS'  
5='5: NOT ATTEMPTED SAFETY'  
6='6: NOT ATTEMPTED NOT SAFETY REASON'  
7='7: NO CHAIR/SAFETY REASON'  
8='8: NO CHAIR/NOT SAFETY REAS'  
9='9: NOT ATTEMPTED/MISSING'  
10='10: CH4=1 SINGLE CHAIR NOT COMPL';
```

### VALUE RESULT\_RCH

```
-9='-9: MISSING'  
1='1: COMPLETED W/OUT ARMS'  
2='2: COMPLETED MISSING RESULTS'  
3='3: ATTEMPTED W RESULTS'  
4='4: ATTEMPTED MISSING RESULTS'  
5='5: NOT ATTEMPTED SAFETY'  
6='6: NOT ATTEMPTED NOT SAFETY REASON'  
9='9: NO CHAIR OR NOT ATTEMPTED/MISSING';
```

### VALUE ZEROSCORE

```
1="1: NOT ELIGIBLE DUE TO EXCLUSION CRITERIA"  
2="2: NOT ATTEMPTED FOR SAFETY REASON"  
3="3: ATTEMPTED CHAIR STANDS/NOT ATTEMPTED FOR SAFETY"  
4="4: ATTEMPTED"  
5="5: NEW WALKING EXCLUSION"  
9="9: NOT ASSIGNED A ZERO SCORE";
```

### VALUE D\_LMLLOC

```
1 = '1 Community'  
2 = '2 Residential Care'  
-1 = '-1 Inapplicable'  
-9 = '-9 Missing';
```

### VALUE D\_LOCSP

```
-7 = '-7 RF'  
-8 = '-8 DK'  
-1 = '-1 Inapplicable'  
-9 = '-9 Missing'  
1 = "1 Independent Living/Housing/Retirement"  
2 = "2 Assisted Living/Personal Care"  
3 = "3 Special Care, Memory or Alzheimer's Unit"  
4 = "4 Nursing Home"
```

## SAS ALGORITHM FOR DEMENTIA

```
      8 = "8 Not Reported" ;

      VALUE PA25FMT
-1 = '-1 Inapplicable'
-8 = '-8 DK'
-9 = '-9 Missing'
111= '111 Sleeping Napping'
131= '131 Eating'
132= '132 Going out to eat'
199= '199 Other self care activities'
211= '211 Work and work-related activities'
221= '221 Other income generating activities'
241= '241 Volunteering'
299= '299 Other productive activities'
321= '321 Shopping for non-durable goods'
399= '399 Other shopping'
411= '411 Food and drink preparation'
434= '434 Outdoor Maintenance'
439= '439 Household chores (cannot tell if indoor/outdoor)'
441= '441 Animal and pet care'
442= '442 Walking and exercising pets'
449= '449 Other animal and pet care'
451= '451 Vehicle maintenance and repair'
471= '471 Financial management'
499= '499 Other household activities'
511= '511 Physical care and assistance to others'
599= '599 Other physical care'
611= '611 Socializing with others in person'
612= '612 Socializing with others on the phone'
616= '616 Socializing and communicating on the computer'
621= '621 Watching TV and movies'
631= '631 Doing puzzles or games not on computer or online'
632= '632 Gambling not online or at a casino'
636= '636 Doing puzzles or games on a computer or online'
641= '641 Arts and crafts or hobbies'
642= '642 Reading'
643= '643 Writing'
644= '644 Listening to music'
646= '646 Computer or online leisure activities'
651= '651 Smoking or other tobacco use'
652= '652 Drinking alcohol'
661= '661 Doing nothing/relaxing'
669= '669 No activity'
699= '699 Other non active leisure'
711= '711 Playing sports'
712= '712 Walking or jogging'
713= '713 Other outdoor recreating activities'
714= '714 Attending sporting events'
715= '715 Other physical activity, exercise, yoga, swimming, working out,
dancing'
718= '718 Watching sporting events'
721= '721 Attending arts including plays and concerts'
723= '723 Attending movies'
724= '724 Attending casinos'
737= '737 Travel for leisure'
799= '799 Other active leisure'
811= '811 Attending religious activities'
```



## SAS ALGORITHM FOR DEMENTIA

```
812= '812 Other religious and spiritual activities'
821= '821 Attending meetings or events'
899= '899 Other organizational activity'
991= '991 Other miscellaneous'
992= '992 No favorite activity'
997= '997 Refused'
998= '998 Dont Know'
999= '999 Not Codeable';

      VALUE OCC_CODE
1  ='1 Management Occupations: 0010-0430'
2  ='2 Business and Financial Operations Occupations: 0500-0950'
3  ='3 Computer and mathematical occupations: 1000-1240'
4  ='4 Architecture and Engineering Occupations: 1300-1560'
5  ='5 Life, Physical, and Social Science Occupations: 1600-1965'
6  ='6 Community and Social Service Occupations: 2000-2060'
7  ='7 Legal Occupations: 2100-2160'
8  ='8 Education, Training, and Library Occupations: 2200-2550'
9  ='9 Arts, Design, Entertainment, Sports, and Media Occupations: 2600-
2960'
10 ='10 Healthcare Practitioners and Technical Occupations: 3000-3540'
11 ='11 Healthcare Support Occupations: 3600-3655'
12 ='12 Protective Service Occupations: 3700-3955'
13 ='13 Food Preparation and Serving Related Occupations: 4000-4160'
14 ='14 Building and Grounds Cleaning and Maintenance Occupations: 4200-
4250'
15 ='15 Personal Care and Service Occupations: 4300-4650'
16 ='16 Sales and Related Occupations: 4700-4965'
17 ='17 Office and Administrative Support Occupations: 5000-5940'
18 ='18 Farming, Fishing, and Forestry Occupations: 6000-6130'
19 ='19 Construction and Extraction Occupations: 6200-6940'
20 ='20 Installation, Maintenance, and Repair Occupations: 7000-7630'
21 ='21 Production Occupations: 7700-8965'
22 ='22 Transportation and Material Moving Occupations: 9000-9750'
23 ='23 Military Specific Occupations: 9800-9830'
24 ='24 No current occ (Unemployed, no work in the last 5 years, never
worked): 9920'
25 = '25 Blank field'
26 = '26 Code did not match'
94 = '94 Uncodable'
95 = '95 Never Worked Entire Life'
96 = '96 Homemaker/Raised Children'
-7 = '-7 RF'
-8 = '-8 DK'
-1 = '-1 Inapplicable'
-9 = '-9 Missing';

      Value fl_Dfac
1 = '1 Should have routed as facility but did not'
2 = '2 Routed as facility but determined not facility resident'
-1 = '-1 Inapplicable';
VALUE PE_RSLT
-9='-9 Missing'
-1 = '-1 Inapplicable'
1='1 Completed'
2='2 Attempted'
3='3 Not attempted' ;
```

## SAS ALGORITHM FOR DEMENTIA

```

VALUE dosfacd /* FOR FQ2dosfacd */
  -9= "-9 Missing"
  -8 = "-8 DK"
  -1 = "-1 INAPPLICABLE"
  1 = " 1 FREE STANDING NURSING HOME"
  2 = " 2 FREE STANDING ASSISTED LIVING FACILITY / RESIDENTIAL CARE
FACILITY"
  3 = " 3 NURSING HOME AND ASSISTED LIVING FACILITY"
  4 = " 4 CONTINUING CARE RETIREMENT COMMUNITY (CCRC)"
  5 = " 5 ADULT FAMILY CARE HOME"
  6 = " 6 GROUP HOME"
  7 = " 7 BOARD AND CARE HOME / PERSONAL CARE HOME"
  8 = " 8 RETIREMENT COMMUNITY OR SENIOR HOUSING (NOT CCRC)"
  9 = " 9 INDEPENDENT LIVING"
 10 = "10 ASSISTED AND INDEPENDENT/RETIREMENT (NO NURSING HOME)"
 11 = "11 HOUSING (APT, CONDO, ETC.)";
;
VALUE dosfaca /* FOR FQ2dosfaca */
  -9= "-9 Missing"
  -8 = "-8 DK"
  -1 = "-1 INAPPLICABLE"
  1 = " 1 INDEPENDENT LIVING / HOUSING / RETIREMENT "
  2 = " 2 ASSISTED LIVING / PERSONAL CARE"
  3 = " 3 SPECIAL CARE, MEMORY CARE, OR ALZHEIMER'S UNIT"
  4 = " 4 NURSING HOME" ;

VALUE INAP_YN
  1 = ' 1 Yes'
  2 = ' 2 No'
  -1 = '-1 Inapplicable' ;

VALUE CENDIV /* RE1DCENSDIV - Updated for R2 - Re-Release */
  1 = '1 Northeast Region: New England Division (ME, NH, VT, MA, RI, CT)'
  2 = '2 Northeast Region: Middle Atlantic Division (NY, NJ, PA)'
  3 = '3 Midwest Region: East North Central Division (OH, IN, IL, MI, WI)'
  4 = '4 Midwest Region: West North Central Division (MN, IA, MO, ND, SD,
NE, KS)'
  5 = '5 South Region: South Atlantic Division (DE, MD, DC, VA, WV, NC,
SC, GA, FL)'
  6 = '6 South Region: East South Central Division (KY, TN, AL, MS)'
  7 = '7 South Region: West South Central Division (AR, LA, OK, TX)'
  8 = '8 West Region: Mountain Division (MT, ID, WY, CO, NM, AZ, UT, NV)'
  9 = '9 West Region: Pacific Division (WA, OR, CA, AK, HI)'
  -9 = '-9 Missing';

VALUE W000002W
  -7 = '-7 RF'
  -8 = '-8 DK'
  -1 = '-1 Inapplicable'
  -9 = '-9 Missing'
  1 = "1 MALE"
  2 = "2 FEMALE" ;

VALUE W000005W
  1 = ' 1 Yes'
  2 = ' 2 No'
  -7 = '-7 RF'
  -8 = '-8 DK'

```

## SAS ALGORITHM FOR DEMENTIA

```
-1 = '-1 Inapplicable'
-9 = '-9 Missing';

VALUE R1DRESID
  -1 = '-1 Inapplicable'
  1 = '1 Community '
  2 = '2 Residential Care Resident not nursing home (SP interview
complete)'
  3 = '3 Residential Care Resident not nursing home (FQ only)'
  4 = '4 Nursing Home Resident';

VALUE W200016W
-7 = '-7 RF'
-8 = '-8 DK'
-1 = '-1 Inapplicable'
-9 = '-9 Missing'
 1 = "1 MEDICAID"
 2 = "2 MEDICARE"
 3 = "3 STATE PROGRAM"
91 = "91 OTHER (SPECIFY)" ;

VALUE W200012W
-7 = '-7 RF'
-8 = '-8 DK'
-1 = '-1 Inapplicable'
-9 = '-9 Missing'
 1 = "1 REGULAR"
 2 = "2 VARIED" ;

VALUE W200061W
-7 = '-7 RF'
-8 = '-8 DK'
-1 = '-1 Inapplicable'
-9 = '-9 Missing'
 1 = "1 SEPARATION OR DIVORCE"
 2 = "2 DECEASED"
 3 = "3 MOVED ELSEWHERE"
 5 = "5 LAST INTERVIEW INFORMATION INCORRECT"
 8 = "8 OTHER REASON" ;

VALUE d2hrsmth
-13= '-13 Deceased '
-12= '-12 Zero days/wk'
-11= '-11 Hours missing'
-10= '-10 Days missing'
-9 = ' -9 Days and hrs missing'
-1 = ' -1 Inapplicable'
-7 = ' -7 RF'
-8 = ' -8 DK'
 0-<1 = '<1'
 1-<10 = ' 1-<10'
10-<20 = '10-<20'
20-<30 = '20-<30'
30-<40 = '30-<40'
40-<60 = '40-<60'
60-<120 = '60-<120'
120-<180='120-<180'
```

## SAS ALGORITHM FOR DEMENTIA

```
180-744='180-744 (24/7) '  
9999='9999 Not codeable, <1 hour/day' ;
```

VALUE dhrsmth

```
-11= '-11:hours missing'  
-10= '-10:days missing'  
-9 = '-9:days and hrs missing'  
-1 = '-1 Inapplicable'  
-7 = '-7 RF'  
-8 = '-8 DK'  
0-<1 = '<1 '  
1-<10 = ' 1-<10 '  
10-<20 = '10-<20 '  
20-<30 = '20-<30 '  
30-<40 = '30-<40 '  
40-<60 = '40-<60 '  
60-<120 = '60-<120 '  
120-<180='120-<180 '  
180-744='180-744 (24/7) '  
9999='9999 Not codeable, <1 hour/day' ;
```

Value dmissadd

```
-1='-1 Inapplicable'  
1='1 no flags and added at CL section'  
2='2 no flags and added at DT section'  
3='3 no flags and added at EW section'  
4='4 no flags and added at HA section'  
5='5 no flags and added at HO section'  
6='6 no flags and added at MC section'  
7='7 no flags and added at MO section'  
8='8 no flags and added at PA section'  
9='9 no flags and added at PE section'  
10='10 no flags and added at SC section'  
11='11 no flags and added at SN section';
```

Value d2mssadd

```
-1='-1 Inapplicable'  
0='0 no flags and added at undetermined section'  
1='1 no flags and added at CL section'  
2='2 no flags and added at DT section'  
3='3 no flags and added at EW section'  
4='4 no flags and added at HA section'  
5='5 no flags and added at HO section'  
6='6 no flags and added at MC section'  
7='7 no flags and added at MO section'  
8='8 no flags and added at PA section'  
9='9 no flags and added at PE section'  
10='10 no flags and added at SC section'  
11='11 no flags and added at SN section'  
12='12 no flags and added at CS section'  
13='13 no flags and added at HH section'  
14='14 no flags and added at IS section';
```

Value dopage3c

```
-9='-9 Missing'  
-8='-8 RF'  
-7='-7 DK'
```

## SAS ALGORITHM FOR DEMENTIA

```
-1='-1 Inapplicable'  
1='1 UNDER 30'  
2='2 30-39'  
3='3 40-49'  
4='4 50-59'  
5='5 60-69'  
6='6 70-79'  
7='7 80-89'  
8='8 90 +';  
  
Value dopagect  
-9='-9 Missing'  
-8='-8 DK'  
-7='-7 RF'  
-1='-1 Inapplicable'  
1='1 UNDER 20'  
2='2 20-24'  
3='3 25-29'  
4='4 30-34'  
5='5 35-39'  
6='6 40-44'  
7='7 45-49'  
8='8 50-54'  
9='9 55-59'  
10='10 60-64'  
11='11 65-69'  
12='12 70-74'  
13='13 75-79'  
14='14 80-84'  
15='15 85-89'  
16='16 90 +';  
  
VALUE W200008W  
-7 = '-7 RF'  
-8 = '-8 DK'  
-1 = '-1 Inapplicable'  
-9 = '-9 Missing'  
1 = "1 UNDER 20"  
2 = "2 20-24"  
3 = "3 25-29"  
4 = "4 30-34"  
5 = "5 35-39"  
6 = "6 40-44"  
7 = "7 45-49"  
8 = "8 50-54"  
9 = "9 55-59"  
10 = "10 60-65"  
11 = "11 66-69"  
12 = "12 70-74"  
13 = "13 75-79"  
14 = "14 80-85"  
15 = "15 86-89"  
16 = "16 90-94"  
17 = "17 95-99"  
18 = "18 100 +"  
;
```

## SAS ALGORITHM FOR DEMENTIA

```
VALUE NumCigs
-7 = '-7 RF'
-8 = '-8 DK'
-1 = '-1 Inapplicable'
-9 = '-9 Missing'
999 = '999 SP smokes less than 1 cigarette / day';
```

```
VALUE dlmlint
 1 = '1 Last month of life interview'
-1 = '-1 Inapplicable' ;
```

```
VALUE d2intvra
 1 = '1 65 to 69'
 2 = '2 70 to 74'
 3 = '3 75 to 79'
 4 = '4 80 to 84'
 5 = '5 85 to 89'
 6 = '6 90+'
-7 = '-7 RF'
-8 = '-8 DK'
-1 = '-1 Inapplicable'
-9 = '-9 Missing' ;
```

```
VALUE dad8dem
 1 = '1 DEMENTIA RESPONSE TO ANY AD8 ITEMS IN PRIOR ROUNDS'
-1 = '-1 Inapplicable' ;
```

```
VALUE dwrdirre
 1 = '1 No words remembered'
-1 = '-1 Inapplicable'
-9 = '-9 Missing' ;
```

```
VALUE dwrdirre
 1 = '1 Refused word recall task'
-1 = '-1 Inapplicable'
-9 = '-9 Missing' ;
```

```
VALUE A0001AB
 1 = "1 AM"
 2 = "2 PM"
-1 = '-1 Inapplicable'
-9 = '-9 Missing';
```

```
VALUE A0002WA
 1 = "1 Yes, there is space to set up the walking course"
 2 = "2 No, there is not space to set up the walking course"
-1 = '-1 Inapplicable'
-9 = '-9 Missing';
```

```
VALUE A0004WA
 1 = "1 None"
 2 = "2 Cane"
 3 = "3 Walker or rollator"
 9 = "9 Other, specify"
-1 = '-1 Inapplicable'
-7 = '-7 RF'
```

## SAS ALGORITHM FOR DEMENTIA

```
-8 = '-8 DK'  
-9 = '-9 Missing';
```

```
VALUE A0004CH  
  1 = "1 No, chair stand not completed"  
  2 = "2 Yes, chair stand completed"  
 -1 = '-1 Inapplicable'  
 -9 = '-9 Missing';
```

```
VALUE A0008CH  
  1 = "1 With arms"  
  2 = "2 Without arms"  
 -1 = '-1 Inapplicable'  
 -9 = '-9 Missing';
```

```
VALUE A0014CH  
  1 = "1 1 Chair stand completed"  
  2 = "2 2 Chair stands completed"  
  3 = "3 3 Chair stands completed"  
  4 = "4 4 Chair stands completed"  
 -1 = '-1 Inapplicable'  
 -9 = '-9 Missing';
```

```
VALUE BA1SS  
  1 = '1 Eligible and recorded result for SxS Balance'  
  2 = '2 Eligible and no recorded result for SxS Balance'  
  4 = '4 Not Eligible due to exclusion criteria'  
 -1 = '-1 Inapplicable'  
 -9 = '-9 Missing';
```

```
VALUE BA1STAN  
  1 = '1 Eligible and recorded result for Semi Tandem Balance'  
  2 = '2 Eligible and no recorded result for Semi Tandem Balance'  
  3 = '3 Not administered because did not complete prior balance test'  
  4 = '4 Not Eligible due to exclusion criteria'  
 -1 = '-1 Inapplicable'  
 -9 = '-9 Missing';
```

```
VALUE BA1TAN  
  1 = '1 Eligible and recorded result for full tandem balance'  
  2 = '2 Eligible and no recorded result for full tandem balance'  
  3 = '3 Not administered because did not complete prior balance tests'  
  4 = '4 Not Eligible due to exclusion criteria'  
 -1 = '-1 Inapplicable'  
 -9 = '-9 Missing';
```

```
VALUE BA1OP  
  1 = '1 Eligible and recorded result for one leg eyes open balance'  
  2 = '2 Eligible and no recorded result for one leg eyes open balance'  
  3 = '3 Not administered because did not complete prior balance tests'  
  4 = '4 Not Eligible due to exclusion criteria'  
 -1 = '-1 Inapplicable'  
 -9 = '-9 Missing';
```

```
VALUE BA1CL  
  1 = '1 Eligible and recorded result for one leg eyes closed balance'  
  2 = '2 Eligible and no recorded result for one leg eyes closed balance'
```

## SAS ALGORITHM FOR DEMENTIA

```
3 = '3 Not administered because did not complete prior balance tests'  
4 = '4 Not Eligible due to exclusion criteria'  
-1 = '-1 Inapplicable'  
-9 = '-9 Missing';
```

### VALUE WA1WLK

```
1 = '1 Eligible and recorded result for walking course'  
2 = '2 Eligible and no recorded result for walking course'  
4 = '4 Not Eligible due to exclusion criteria'  
5 = '5 Not Eligible on exclusion criteria but recorded result (SP changed  
mind)'  
-1 = '-1 Inapplicable '  
-9 = '-9 Missing';
```

### VALUE CH1SCH

```
1 = '1 Eligible and recorded result for single chair stand'  
2 = '2 Eligible and no recorded result for single chair stand'  
4 = '4 Not Eligible due to exclusion criteria'  
-1 = '-1 Inapplicable'  
-9 = '-9 Missing';
```

### VALUE CH1RSH

```
1 = '1 Eligible and recorded result for repeated chair stand'  
2 = '2 Eligible and no recorded result for repeated chair stand'  
3 = '3 Not administered because did not complete single chair stand w/o  
arms'  
4 = '4 Not Eligible due to exclusion criteria'  
-1 = '-1 Inapplicable'  
-9 = '-9 Missing';
```

### VALUE GR1GRIP

```
1 = '1 Eligible and recorded result for grip strength'  
2 = '2 Eligible and no recorded result for grip strength'  
4 = '4 Not Eligible due to exclusion criteria'  
-1 = '-1 Inapplicable'  
-9 = '-9 Missing';
```

### VALUE WC1WAIST

```
1 = '1 Eligible and recorded result for waist circumference'  
2 = '2 Eligible and no recorded result for waist circumference'  
-1 = '-1 Inapplicable'  
-9 = '-9 Missing';
```

### VALUE PK1PEAK

```
1 = '1 Eligible and recorded result for peak air flow'  
2 = '2 Eligible and no recorded result for peak air flow'  
-1 = '-1 Inapplicable'  
-9 = '-9 Missing';
```

### VALUE RGT\_LFT

```
1 = '1 Right'  
2 = '2 Left'  
-1 = '-1 Inapplicable'  
-9 = '-9 Missing';
```

### VALUE PERSON

```
1 = '1 Interviewer'
```



## SAS ALGORITHM FOR DEMENTIA

```
2 = '2 Sample person'  
-1 = '-1 Inapplicable'  
-9 = '-9 Missing';
```

### VALUE STAND

```
1 = '1 Standing'  
2 = '2 Sitting'  
3 = '3 Lying down'  
-1 = '-1 Inapplicable'  
-9 = '-9 Missing';
```

### VALUE EFFORT

```
1 = '1 Full effort'  
2 = '2 Less effort for health reason'  
3 = '3 Less effort for other reason'  
-1 = '-1 Inapplicable'  
-9 = '-9 Missing';
```

### VALUE WORDREC

```
1 = ' 1 LIST 1'  
2 = ' 2 LIST 2'  
3 = ' 3 LIST 3'  
-1 = '-1 Inapplicable '  
-9 = '-9 Missing';
```

### VALUE WORDRE\_N

```
-1 = '-1 Inapplicable'  
-2 = '-2 Proxy says cannot ask SP'  
-3 = '-3 Proxy says can ask SP but SP unable to answer'  
-7 = '-7 SP refused activity'  
-9 = '-9 Missing';
```

### VALUE SP30051W

```
-7 = '-7 RF'  
-8 = '-8 DK'  
-1 = '-1 Inapplicable'  
-9 = '-9 Missing'  
1 = "1 EXCELLENT"  
2 = "2 VERY GOOD"  
3 = "3 GOOD"  
4 = "4 FAIR"  
5 = "5 POOR"  
6 = "6 DOES NOT APPLY/NO CARE IN LAST MONTH OF LIFE"
```

;

### VALUE SP3019aW

```
-7 = '-7 RF'  
-8 = '-8 DK'  
-1 = '-1 Inapplicable'  
-9 = '-9 Missing'  
1 = "1 JANUARY"  
2 = "2 FEBRUARY"  
3 = "3 MARCH"  
4 = "4 APRIL"  
5 = "5 MAY"  
6 = "6 JUNE"  
7 = "7 JULY"  
8 = "8 AUGUST"  
9 = "9 SEPTEMBER"
```

## SAS ALGORITHM FOR DEMENTIA

```
10 = "10 OCTOBER"
11 = "11 NOVEMBER"
12 = "12 DECEMBER"
90 = "90 LAST INTERVIEW INFORMATION INCORRECT"
;
VALUE RACEHISP
  1 = ' 1 White, non-hispanic'
  2 = ' 2 Black, non-hispanic'
  3 = ' 3 Other (Am Indian/Asian/Native Hawaiian/Pacific Islander/other
specify), non-Hispanic'
  4 = ' 4 Hispanic'
  5 = ' 5 More than one DKRF primary'
  6 = ' 6 DKRF'
  -9 = '-9 Missing';

VALUE SPPB_MIS
  -7 = '-7 RF'
-8 = '-8 DK'
-9 = '-9 Missing'
-1="-1 Inapplicable"
1="1 Proxy interview"
2="2 Missing walk and repeat chair and balance"
3="3 Missing walk and repeat chair"
4="4 Missing walk and balance"
5="5 Missing repeat chair and balance"
6="6 Missing walk"
7="7 Missing repeat chair"
8="8 Missing balance"
9="9 No space"
10="10 No chair"
11="11 No space walk and no chair"
12="12 No space walk and non-safety missing"
13="13 No chair and non-safety missing"
14="14 Non-safety walk"
15="15 Non-safety chair"
16="16 Non-safety balance"
17="17 Non-safety walk and chair"
18="18 Non-safety walk and balance"
19="19 Non-safety chair and balance"
20="20 Non-safety walk and chair and balance";

VALUE QUARTILES
-9="-9 Missing"
-1="-1 Inapplicable"
;
VALUE SP30025W
  -7 = '-7 RF'
  -8 = '-8 DK'
  -1 = '-1 Inapplicable'
  -9 = '-9 Missing'
  1 = "1 FREE-STANDING (DETACHED) SINGLE HOUSE"
  2 = "2 SINGLE HOUSE BUT ATTACHED TO OTHERS (ROW HOUSE, TOWNHOUSE, DUPLEX,
TRIPLEX, OR TRIPLE DECKER)"
  3 = "3 MOBILE HOME OR TRAILER"
  4 = "4 MULTI-UNIT (2+) BUILDING"
  91 = "91 OTHER (SPECIFY)"
;
```

## SAS ALGORITHM FOR DEMENTIA

```
VALUE SP30046W
  -7 = '-7 RF'
-8 = '-8 DK'
-1 = '-1 Inapplicable'
-9 = '-9 Missing'
  1 = "1 AT SP'S HOME"
  2 = "2 IN A HOSPITAL"
  3 = "3 IN A NURSING HOME"
  4 = "4 IN A HOSPICE RESIDENCE"
  5 = "5 AT SOMEONE ELSE'S HOME"
  91 = "91 SOMEWHERE ELSE (SPECIFY)"
;
VALUE SP30076W
  -7 = '-7 RF'
-8 = '-8 DK'
-1 = '-1 Inapplicable'
-9 = '-9 Missing'
  1 = "1 YES"
  2 = "2 NO"
  7 = "7 YES, DOESNT KNOW HOW TO USE"
;
VALUE W300151W
  -7 = '-7 RF'
  -8 = '-8 DK'
  -1 = '-1 Inapplicable'
  -9 = '-9 Missing'
  1 = "1 VERY GOOD"
  2 = "2 GOOD"
  3 = "3 FAIR"
  4 = "4 POOR"
  5 = "5 VERY POOR" ;

VALUE SP30076H
  -7 = '-7 RF'
  -8 = '-8 DK'
  -1 = '-1 Inapplicable'
  -9 = '-9 Missing'
  95 = "95 NO USUAL NUMBER OF HOURS OR DIFFERENT FROM DAY TO DAY" ;
VALUE SP30076G
  -7 = '-7 RF'
  -8 = '-8 DK'
  -1 = '-1 Inapplicable'
  -9 = '-9 Missing'
  95 = "95 NO USUAL TIME OR DIFFERENT FROM DAY TO DAY" ;
VALUE SP30076I
  -7 = '-7 RF'
  -8 = '-8 DK'
  -1 = '-1 Inapplicable'
  -9 = '-9 Missing'
  95 = "95 NO USUAL NUMBER OF HOURS OR DIFFERENT FROM NIGHT TO NIGHT"
;
VALUE SP30076J
  -7 = '-7 RF'
  -8 = '-8 DK'
  -1 = '-1 Inapplicable'
  -9 = '-9 Missing'
  95 = "95 NO USUAL TIME OR DIFFERENT FROM NIGHT TO NIGHT" ;
```

## SAS ALGORITHM FOR DEMENTIA

```
VALUE SP30076K
  -7 = '-7 RF'
  -8 = '-8 DK'
  -1 = '-1 Inapplicable'
  -9 = '-9 Missing'
  0 = "0 LESS THAN AN HOUR"
  90 = "90 FELL ASLEEP RIGHT AWAY"
  95 = "95 NO USUAL AMOUNT OF TIME TO FALL ASLEEP OR DIFFERENT FROM
NIGHT TO NIGHT" ;
VALUE SP30155W
  -7 = '-7 RF'
  -8 = '-8 DK'
  -1 = '-1 Inapplicable'
  -9 = '-9 Missing'
  1 = "1 NAPS PLANNED"
  2 = "2 FELL ASLEEP WITHOUT MEANING TO"
  3 = "3 BOTH (SOME PLANNED/SOME NOT)" ;
VALUE SP30120W
  -7 = '-7 RF'
  -8 = '-8 DK'
  -1 = '-1 Inapplicable'
  -9 = '-9 Missing'
  1 = "1 OFTEN"
  2 = "2 SOMETIMES"
  3 = "3 RARELY"
  4 = "4 NEVER" ;
Value HOURSF
-13='-13 SP deceased/section not administered'
-12='-12 Valid skip/staff'
-11='-11 Hours missing'
-10='-10 Days missing'
  -9='-9 Days and hrs missing'
  -1='-1 Inapplicable'
0- 1='0-<1'
1.01- 10='1-<10'
10.01- 20='10-<20'
20.01- 30='20-<30'
30.01-40='30-<40'
40.01-60='40-<60'
60.01-120='60-<120'
120.01-180='120-<180'
180.01-744='180-744 (24/7)'
9999='9999 Not codeable, <1 hour/day';
VALUE SP30120W
  -7 = '-7 RF'
  -8 = '-8 DK'
  -1 = '-1 Inapplicable'
  -9 = '-9 Missing'
  1 = "1 OFTEN"
  2 = "2 SOMETIMES"
  3 = "3 RARELY"
  4 = "4 NEVER"
;
VALUE SP30118W
  -7 = '-7 RF'
  -8 = '-8 DK'
  -1 = '-1 Inapplicable'
```

## SAS ALGORITHM FOR DEMENTIA

```
-9 = '-9 Missing'
 1 = "1 A LOT"
 2 = "2 SOME"
 3 = "3 A LITTLE"
 4 = "4 NOT AT ALL" ;
VALUE SP30141W
-7 = '-7 RF'
-8 = '-8 DK'
-1 = '-1 Inapplicable'
-9 = '-9 Missing'
 1 = "less than $27,600,"
 2 = "$27,600-$41,999,"
 3 = "$42,000-$63,999,"
 4 = "$64,000-$107,999, or"
 5 = "$108,000 or more?" ;
VALUE SP30142W
-7 = '-7 RF'
-8 = '-8 DK'
-1 = '-1 Inapplicable'
-9 = '-9 Missing'
 1 = "less than $14,000,"
 2 = "$14,000-$21,999,"
 3 = "$22,000-$35,999,"
 4 = "$36,000-$48,999, or"
 5 = "$49,000 or more?" ;
VALUE INVENT
-7 = '-7 RF'
-8 = '-8 DK'
-1 = '-1 Inapplicable'
-9 = '-9 Missing'
 104="104-Arthritis"
 107="107-Lung Disease"
 109="109-Dementia or Alzheimer's disease"
 110="110-Cancer"
 113="113-Other serious disease, illness, health problem"
 114="114-Knee surgery/problem"
 115="115-Hip repair or replacement/problem"
 117="117-Back or Spine Surgery/problem"
 121="121-Sleep Problems"
 201="201-Hearing problems"
 202="202-Sight problems"
 205="205-Pain"
 301="301-Breathing problems"
 302="302-Upper body strength movement"
 303="303-Lower body strength movement"
 304="304-Low energy"
 305="305-Balance or coordination problems"
 306="306-Walking distances"
 307="307-Climbing stairs"
 308="308-Lifting and carrying items"
 309="309-Kneeling"
 310="310-Bending"
 311="311-Reaching"
 312="312-Opening Jars"
 313="313-Grasping"
 401="401-Memory"
 501="501-Getting out of bed"
```

## SAS ALGORITHM FOR DEMENTIA

```
502="502-Getting around inside"
503="503-Getting outside"
504="504-Travel/transportation"
601="601-Eating"
602="602-Washing"
603="603-Toileting"
604="604-Dressing"
605="605-Grooming"
701="701-Laundry"
702="702-Shopping"
703="703-Cooking"
705="705-Money matters"
706="706-Indoor cleaning and maintenance"
707="707-Outdoor cleaning and maintenance"
801="801-Medications"
802="802-Doctor visits"
804="804-Other medical self-care"
1211="1211-Working"
1442="1442-Walking/exercising pets"
1451="1451-Vehicle repair and maintenance"
1461="1461-Appliance tool, and toy use, set-up, repair, &
maintenance"
1462="1462-Computer use, set-up, repair, maintenance, and
education"
1473="1473-Household organization"
1512="1512-Looking after someone else"
1611="1611-Socializing and communicating with others-in person"
1612="1612-Socializing and communication with others by talking
on telephone"
1613="1613-Attending or hosting party, wedding or social
occasions"
1614="1614-Reading and sorting through the mail"
1621="1621-Watch television and movies"
1631="1631-Games & puzzles"
1641="1641-Arts and crafts, collecting, and hobbies, making
music"
1642="1642-Reading"
1643="1642-Writing (personal, not on computer)"
1644="1644-Listening to recorded music or radio"
1711="1711-Playing/practicing sports or taking physical activity
class/lessons"
1712="1712-Walking/jogging for exercise or pleasure or working
out"
1713="1713-Other outdoor recreation activities"
1813="1813-Religious & spiritual volunteer activities"
1901="1901-Other, no existing code"
1998="1998-Don't know"
1999="1999-Refused/blank";
VALUE W500058W
-7 = '-7 RF'
-8 = '-8 DK'
-1 = '-1 Inapplicable'
-9 = '-9 Missing'
1 = "1 MONTHS"
2 = "2 YEARS" ;
VALUE W500103W
-7 = '-7 RF'
```

## SAS ALGORITHM FOR DEMENTIA

```
-8 = '-8 DK'
-1 = '-1 Inapplicable'
-9 = '-9 Missing'
  1 = "1 YES, A YEAR OR MORE"
  2 = "2 NO, LESS THAN A YEAR" ;
VALUE W500105W
-7 = '-7 RF'
-8 = '-8 DK'
-1 = '-1 Inapplicable'
-9 = '-9 Missing'
  1 = "1 MONTH AND YEAR"
  2 = "2 NUMBER OF MONTHS AGO"
  3 = "3 NUMBER OF YEARS AGO"
  4 = "4 AGE WHEN LAST DROVE"
  7 = "7 NEVER DROVE" ;
VALUE W500123W
-7 = '-7 RF'
-8 = '-8 DK'
-1 = '-1 Inapplicable'
-9 = '-9 Missing'
  1 = "1 STILL FAVORITE ACTIVITY"
  2 = "2 HAS A NEW FAVORITE ACTIVITY"
 95 = "95 NO FAVORITE ACTIVITY" ;
VALUE W500124W
-7 = '-7 RF'
-8 = '-8 DK'
-1 = '-1 Inapplicable'
-9 = '-9 Missing'
  1 = "1 LESS THAN 1 MONTH"
  2 = "2 1 TO 3 MONTHS"
  3 = "3 4 TO 5 MONTHS"
  4 = "4 6 OR MORE MONTHS" ;
VALUE W500125W
-7 = '-7 RF'
-8 = '-8 DK'
-1 = '-1 Inapplicable'
-9 = '-9 Missing'
  1 = "1 LESS THAN 1 WEEK"
  2 = "2 1 TO 2 WEEKS"
  3 = "3 3 TO 4 WEEKS" ;
VALUE W500126W
-7 = '-7 RF'
-8 = '-8 DK'
-1 = '-1 Inapplicable'
-9 = '-9 Missing'
  1 = "1 A FRACTURE, SPRAIN, OR INJURY"
  2 = "2 A HIP, KNEE, OR OTHER JOINT REPLACEMENT"
  3 = "3 ANOTHER MUSCULOSKELETAL CONDITION"
  4 = "4 A STROKE OR TIA"
  5 = "5 A HEART ATTACK"
  6 = "6 ANOTHER HEART CONDITION OR VASCULAR DISEASE"
  7 = "7 A BREATHING CONDITION"
  8 = "8 A NEUROLOGICAL CONDITION LIKE MS OR PARKINSONS"
  9 = "9 CANCER"
 94 = "94 ANOTHER CONDITION (SPECIFY)"
 95 = "95 NO MEDICAL CONDITION (IF VOLUNTEERED)" ;
VALUE W500128W
```

## SAS ALGORITHM FOR DEMENTIA

```
-7 = '-7 RF'
-8 = '-8 DK'
-1 = '-1 Inapplicable'
-9 = '-9 Missing'
  1 = "1 DIFFICULTY CHEWING OR SWALLOWING"
  2 = "2 DIFFICULTY SPEAKING OR BEING UNDERSTOOD"
  3 = "3 PAIN LEVEL"
  4 = "4 PROBLEM WITH BREATHING"
  5 = "5 PROBLEM WITH STRENGTH (MUSCLE WEAKNESS)"
  6 = "6 PROBLEM WITH MOVEMENT (RANGE OF MOTION)"
  7 = "7 LOW ENERGY LEVEL"
  8 = "8 PROBLEM WITH BALANCE OR COORDINATION"
  9 = "9 PROBLEM WITH FALLS"
 10 = "10 PROBLEM WITH MEMORY"
 95 = "95 NONE OF THESE PROBLEMS" ;
VALUE W500131W
-7 = '-7 RF'
-8 = '-8 DK'
-1 = '-1 Inapplicable'
-9 = '-9 Missing'
  1 = "1 AS AN OVERNIGHT PATIENT IN A HOSPITAL, NURSING HOME OR REHAD
FACILITY"
  2 = "2 AT AN OUTPATIENT CENTER, CLINIC, DRs OR THERAPISTs OFFICE"
  3 = "3 HOME"
  4 = "4 SOMEWHERE ELSE" ;
VALUE W500132W
-7 = '-7 RF'
-8 = '-8 DK'
-1 = '-1 Inapplicable'
-9 = '-9 Missing'
  1 = "1 IMPROVED"
  2 = "2 GOT WORSE"
  3 = "3 STAYED ABOUT THE SAME"
  4 = "4 VARIED/UP AND DOWN (IF VOLUNTEERED)" ;
VALUE W500133W
-7 = '-7 RF'
-8 = '-8 DK'
-1 = '-1 Inapplicable'
-9 = '-9 Missing'
  1 = "1 A LOT"
  2 = "2 SOMEWHAT"
  3 = "3 A LITTLE" ;
VALUE W500137W
-7 = '-7 RF'
-8 = '-8 DK'
-1 = '-1 Inapplicable'
-9 = '-9 Missing'
  1 = "1 WELL OFF"
  2 = "2 ABOVE AVERAGE"
  3 = "3 AVERAGE"
  4 = "4 BELOW AVERAGE"
  5 = "5 POOR" ;
VALUE W500010W
-7 = '-7 RF'
-8 = '-8 DK'
-1 = '-1 Inapplicable'
```



## SAS ALGORITHM FOR DEMENTIA

```
-9 = '-9 Missing'
  1 = "1 MOTHER ONLY"
  2 = "2 FATHER ONLY"
  3 = "3 ANOTHER RELATIVE"
  4 = "4 NON-RELATIVES"
  5 = "5 VARIED/MOVED AROUND" ;
VALUE W500142W
-7 = '-7 RF'
-8 = '-8 DK'
-1 = '-1 Inapplicable'
-9 = '-9 Missing'
  1 = "1 VERY WELL"
  2 = "2 WELL"
  3 = "3 NOT WELL"
  4 = "4 NOT AT ALL" ;
VALUE W500147W
-7 = '-7 RF'
-8 = '-8 DK'
-1 = '-1 Inapplicable'
-9 = '-9 Missing'
  1 = "1 NUMBER OF YEARS"
  2 = "2 AGE" ;
VALUE W500150W
-7 = '-7 RF'
-8 = '-8 DK'
-1 = '-1 Inapplicable'
-9 = '-9 Missing'
  1 = "1 ENTER PAYCHECK AMOUNT"
  2 = "2 ENTER PAY PER HOUR"
  3 = "3 ENTER PAY PER DAY" ;
VALUE W500151W
-7 = '-7 RF'
-8 = '-8 DK'
-1 = '-1 Inapplicable'
-9 = '-9 Missing'
  1 = "1 ENTER OCCUPATION"
  2 = "2 NEVER WORKED ENTIRE LIFE"
  3 = "3 HOMEMAKER/RAISED CHILDREN/WORKED IN THE HOME" ;
VALUE W500152W
-7 = '-7 RF'
-8 = '-8 DK'
-1 = '-1 Inapplicable'
-9 = '-9 Missing'
  1 = "1 SAME KIND OF WORK"
  2 = "2 SOMETHING DIFFERENT" ;
VALUE W500160W
-7 = '-7 RF'
-8 = '-8 DK'
-1 = '-1 Inapplicable'
-9 = '-9 Missing'
  1 = "1 MAIL"
  2 = "2 DIRECT DEPOSIT"
  3 = "3 PREPAID CARD" ;
VALUE W500165W
-7 = '-7 RF'
-8 = '-8 DK'
-1 = '-1 Inapplicable'
```

## SAS ALGORITHM FOR DEMENTIA

```
-9 = '-9 Missing'
 1 = "1 ENTER COMBINED AMOUNT"
 2 = "2 ENTER SP AND SPOUSE/PARTNER AMOUNTS SEPARATELY" ;
VALUE W500166W
-7 = '-7 RF'
-8 = '-8 DK'
-1 = '-1 Inapplicable'
-9 = '-9 Missing'
 1 = "1 LESS THAN $1,300"
 2 = "2 $1,300 TO LESS THAN $1,700"
 3 = "3 $1,700 TO LESS THAN $2,200"
 4 = "4 $2,200 TO LESS THAN $2,600"
 5 = "5 $2,600 OR MORE" ;
VALUE W500167W
-7 = '-7 RF'
-8 = '-8 DK'
-1 = '-1 Inapplicable'
-9 = '-9 Missing'
 1 = "1 LESS THAN $700"
 2 = "2 $700 TO LESS THAN $1,000"
 3 = "3 $1,000 TO LESS THAN $1,300"
 4 = "4 $1,300 TO LESS THAN $1,600"
 5 = "5 $1,600 OR MORE" ;
VALUE W500168W
-7 = '-7 RF'
-8 = '-8 DK'
-1 = '-1 Inapplicable'
-9 = '-9 Missing'
 1 = "1 LESS THAN $300"
 2 = "2 $300 TO LESS THAN $700"
 3 = "3 $700 TO LESS THAN $1,000"
 4 = "4 $1,000 OR MORE" ;
VALUE W500169W
-7 = '-7 RF'
-8 = '-8 DK'
-1 = '-1 Inapplicable'
-9 = '-9 Missing'
 1 = "1 LESS THAN $100"
 2 = "2 $100 TO LESS THAN $200"
 3 = "3 $200 TO LESS THAN $400"
 4 = "4 $400 TO LESS THAN $700"
 5 = "5 $700 OR MORE" ;
VALUE W500170W
-7 = '-7 RF'
-8 = '-8 DK'
-1 = '-1 Inapplicable'
-9 = '-9 Missing'
 1 = "1 LESS THAN $1,000"
 2 = "2 $1,000 TO LESS THAN $1,400"
 3 = "3 $1,400 TO LESS THAN $1,800"
 4 = "4 $1,800 TO LESS THAN $2,200"
 5 = "5 $2,200 OR MORE" ;
VALUE W500171W
-7 = '-7 RF'
-8 = '-8 DK'
-1 = '-1 Inapplicable'
-9 = '-9 Missing'
```

## SAS ALGORITHM FOR DEMENTIA

```
1 = "1 LESS THAN $500"  
2 = "2 $500 TO LESS THAN $700"  
3 = "3 $700 TO LESS THAN $900"  
4 = "4 $900 TO LESS THAN $1,100"  
5 = "5 $1,100 OR MORE" ;  
VALUE W500172W  
-7 = '-7 RF'  
-8 = '-8 DK'  
-1 = '-1 Inapplicable'  
-9 = '-9 Missing'  
1 = "1 LESS THAN $600"  
2 = "2 $600 TO LESS THAN $1,300"  
3 = "3 $1,300 TO LESS THAN $2,100"  
4 = "4 $2,100 TO LESS THAN $5,900"  
5 = "5 $5,900 OR MORE" ;  
VALUE W500173W  
-7 = '-7 RF'  
-8 = '-8 DK'  
-1 = '-1 Inapplicable'  
-9 = '-9 Missing'  
1 = "1 LESS THAN $400"  
2 = "2 $400 TO LESS THAN $900"  
3 = "3 $900 TO LESS THAN $1,600"  
4 = "4 $1,600 TO LESS THAN $3,800"  
5 = "5 $3,800 OR MORE" ;  
VALUE W500174W  
-7 = '-7 RF'  
-8 = '-8 DK'  
-1 = '-1 Inapplicable'  
-9 = '-9 Missing'  
1 = "1 LESS THAN $34,000"  
2 = "2 $34,000 TO LESS THAN $82,000"  
3 = "3 $82,000 TO LESS THAN $175,000"  
4 = "4 $175,000 TO LESS THAN $413,000"  
5 = "5 $413,000 OR MORE" ;  
VALUE W500175W  
-7 = '-7 RF'  
-8 = '-8 DK'  
-1 = '-1 Inapplicable'  
-9 = '-9 Missing'  
1 = "1 LESS THAN $20,000"  
2 = "2 $20,000 TO LESS THAN $47,000"  
3 = "3 $47,000 TO LESS THAN $92,000"  
4 = "4 $92,000 TO LESS THAN $218,000"  
5 = "5 $218,000 OR MORE" ;  
VALUE W500176W  
-7 = '-7 RF'  
-8 = '-8 DK'  
-1 = '-1 Inapplicable'  
-9 = '-9 Missing'  
1 = "1 LESS THAN $200"  
2 = "2 $200 TO LESS THAN $500"  
3 = "3 $500 TO LESS THAN $1,000"  
4 = "4 $1,000 TO LESS THAN $2,500"  
5 = "5 $2,500 OR MORE" ;  
VALUE W500177W  
-7 = '-7 RF'
```

## SAS ALGORITHM FOR DEMENTIA

```
-8 = '-8 DK'
-1 = '-1 Inapplicable'
-9 = '-9 Missing'
 1 = "1 LESS THAN $100"
 2 = "2 $100 TO LESS THAN $300"
 3 = "3 $300 TO LESS THAN $700"
 4 = "4 $700 TO LESS THAN $1,700"
 5 = "5 $1,700 OR MORE" ;
VALUE W500178W
-7 = '-7 RF'
-8 = '-8 DK'
-1 = '-1 Inapplicable'
-9 = '-9 Missing'
 1 = "1 LESS THAN $2,400"
 2 = "2 $2,400 TO LESS THAN $6,000"
 3 = "3 $6,000 TO LESS THAN $12,000"
 4 = "4 $12,000 TO LESS THAN $30,000"
 5 = "5 $30,000 OR MORE" ;
VALUE W500179W
-7 = '-7 RF'
-8 = '-8 DK'
-1 = '-1 Inapplicable'
-9 = '-9 Missing'
 1 = "1 LESS THAN $1,200"
 2 = "2 $1,200 TO LESS THAN $3,600"
 3 = "3 $3,600 TO LESS THAN $8,400"
 4 = "4 $8,400 TO LESS THAN $20,400"
 5 = "5 $20,400 OR MORE" ;
VALUE W500180W
-7 = '-7 RF'
-8 = '-8 DK'
-1 = '-1 Inapplicable'
-9 = '-9 Missing'
 1 = "1 LESS THAN $9,000"
 2 = "2 $9,000 TO LESS THAN $18,000"
 3 = "3 $18,000 TO LESS THAN $93,000"
 4 = "4 $93,000 TO LESS THAN $350,000"
 5 = "5 $350,000 OR MORE" ;
VALUE W500181W
-7 = '-7 RF'
-8 = '-8 DK'
-1 = '-1 Inapplicable'
-9 = '-9 Missing'
 1 = "1 LESS THAN $600"
 2 = "2 $600 TO LESS THAN $5,000"
 3 = "3 $5,000 TO LESS THAN $16,000"
 4 = "4 $16,000 TO LESS THAN $62,000"
 5 = "5 $62,000 OR MORE" ;
VALUE W500182W
-7 = '-7 RF'
-8 = '-8 DK'
-1 = '-1 Inapplicable'
-9 = '-9 Missing'
 1 = "1 LESS THAN $8,000"
 2 = "2 $8,000 TO LESS THAN $62,000"
 3 = "3 $62,000 TO LESS THAN $192,000"
 4 = "4 $192,000 TO LESS THAN $213,000"
```

## SAS ALGORITHM FOR DEMENTIA

```
5 = "5 $213,000 OR MORE" ;
VALUE W500183W
-7 = '-7 RF'
-8 = '-8 DK'
-1 = '-1 Inapplicable'
-9 = '-9 Missing'
1 = "1 LESS THAN $300"
2 = "2 $300 TO LESS THAN $2,500"
3 = "3 $2,500 TO LESS THAN $8,000"
4 = "4 $8,000 TO LESS THAN $37,000"
5 = "5 $37,000 OR MORE" ;
VALUE W500184W
-7 = '-7 RF'
-8 = '-8 DK'
-1 = '-1 Inapplicable'
-9 = '-9 Missing'
1 = "1 LESS THAN $11,000"
2 = "2 $11,000 TO LESS THAN $25,000"
3 = "3 $25,000 TO LESS THAN $50,000"
4 = "4 $50,000 TO LESS THAN $108,000"
5 = "5 $108,000 OR MORE" ;
VALUE W500185W
-7 = '-7 RF'
-8 = '-8 DK'
-1 = '-1 Inapplicable'
-9 = '-9 Missing'
1 = "1 LESS THAN $2,000"
2 = "2 $2,000 TO LESS THAN $7,000"
3 = "3 $7,000 TO LESS THAN $17,000"
4 = "4 $17,000 TO LESS THAN $57,000"
5 = "5 $57,000 OR MORE" ;
VALUE W500186W
-7 = '-7 RF'
-8 = '-8 DK'
-1 = '-1 Inapplicable'
-9 = '-9 Missing'
1 = "1 LESS THAN $8,000"
2 = "2 $8,000 TO LESS THAN $13,000"
3 = "3 $13,000 TO LESS THAN $28,000"
4 = "4 $28,000 TO LESS THAN $54,000"
5 = "5 $54,000 OR MORE" ;
VALUE W500187W
-7 = '-7 RF'
-8 = '-8 DK'
-1 = '-1 Inapplicable'
-9 = '-9 Missing'
1 = "1 LESS THAN $500"
2 = "2 $500 TO LESS THAN $1,900"
3 = "3 $1,900 TO LESS THAN $5,000"
4 = "4 $5,000 TO LESS THAN $20,000"
5 = "5 $20,000 OR MORE" ;
VALUE W500188W
-7 = '-7 RF'
-8 = '-8 DK'
-1 = '-1 Inapplicable'
-9 = '-9 Missing'
1 = "1 LESS THAN $200"
```

## SAS ALGORITHM FOR DEMENTIA

```
2 = "2 $200 TO LESS THAN $1,000"  
3 = "3 $1,000 TO LESS THAN $4,000"  
4 = "4 $4,000 TO LESS THAN $16,000"  
5 = "5 $16,000 OR MORE" ;  
VALUE W500189W  
-7 = '-7 RF'  
-8 = '-8 DK'  
-1 = '-1 Inapplicable'  
-9 = '-9 Missing'  
1 = "1 LESS THAN $400"  
2 = "2 $400 TO LESS THAN $1,000"  
3 = "3 $1,000 TO LESS THAN $2,000"  
4 = "4 $2,000 TO LESS THAN $11,000"  
5 = "5 $11,000 OR MORE" ;  
VALUE W500190W  
-7 = '-7 RF'  
-8 = '-8 DK'  
-1 = '-1 Inapplicable'  
-9 = '-9 Missing'  
1 = "1 LESS THAN $30,000"  
2 = "2 $30,000 TO LESS THAN $101,000"  
3 = "3 $101,000 TO LESS THAN $247,000"  
4 = "4 $247,000 TO LESS THAN $703,000"  
5 = "5 $703,000 OR MORE" ;  
VALUE W500191W  
-7 = '-7 RF'  
-8 = '-8 DK'  
-1 = '-1 Inapplicable'  
-9 = '-9 Missing'  
1 = "1 LESS THAN $18,000"  
2 = "2 $18,000 TO LESS THAN $68,000"  
3 = "3 $68,000 TO LESS THAN $122,000"  
4 = "4 $122,000 TO LESS THAN $293,000"  
5 = "5 $293,000 OR MORE" ;  
VALUE W500192W  
-7 = '-7 RF'  
-8 = '-8 DK'  
-1 = '-1 Inapplicable'  
-9 = '-9 Missing'  
1 = "1 LESS THAN $3,600"  
2 = "2 $3,600 TO LESS THAN $12,000"  
3 = "3 $12,000 TO LESS THAN $25,000"  
4 = "4 $25,000 TO LESS THAN $64,000"  
5 = "5 $64,000 OR MORE" ;  
VALUE W500193W  
-7 = '-7 RF'  
-8 = '-8 DK'  
-1 = '-1 Inapplicable'  
-9 = '-9 Missing'  
1 = "1 LESS THAN $3,600"  
2 = "2 $3,600 TO LESS THAN $7,200"  
3 = "3 $7,200 TO LESS THAN $14,000"  
4 = "4 $14,000 TO LESS THAN $38,000"  
5 = "5 $38,000 OR MORE" ;  
VALUE W500194W  
-7 = '-7 RF'  
-8 = '-8 DK'
```

## SAS ALGORITHM FOR DEMENTIA

```
-1 = '-1 Inapplicable'
-9 = '-9 Missing'
 1 = "1 LESS THAN $30,000"
 2 = "2 $30,000 TO LESS THAN $43,000"
 3 = "3 $43,000 TO LESS THAN $66,000"
 4 = "4 $66,000 TO LESS THAN $109,000"
 5 = "5 $109,000 OR MORE" ;

VALUE W500195W
-7 = '-7 RF'
-8 = '-8 DK'
-1 = '-1 Inapplicable'
-9 = '-9 Missing'
 1 = "1 LESS THAN $18,000"
 2 = "2 $18,000 TO LESS THAN $22,000"
 3 = "3 $22,000 TO LESS THAN $36,000"
 4 = "4 $36,000 TO LESS THAN $56,000"
 5 = "5 $56,000 OR MORE" ;

VALUE W500209W
-7 = '-7 RF'
-8 = '-8 DK'
-1 = '-1 Inapplicable'
-9 = '-9 Missing'
 1 = "1 YES"
 2 = "2 NO"
 3 = "3 CANT DO - DONT DO" ;

VALUE W500196W
-7 = '-7 RF'
-8 = '-8 DK'
-1 = '-1 Inapplicable'
-9 = '-9 Missing'
 1 = "1 LESS THAN $2,500"
 2 = "2 $2,500 TO LESS THAN $5,000"
 3 = "3 $5,000 TO LESS THAN $10,000"
 4 = "4 $10,000 TO LESS THAN $20,000"
 5 = "5 $20,000 TO LESS THAN $50,000"
 6 = "6 $50,000 OR MORE" ;

VALUE dage2us
 0 = "0 Less than age 1"
 997 = "997 Born in US"
-8 = "-8 DK"
-7 = "-7 RF"
-1 = "-1 Inapplicable";

VALUE locsp
-9 = "-9 MISSING"
-8 = "-8 DK"
-7 = "-7 RF"
-1 = "-1 Inapplicable"
 1 = "1 Independent Living"
 2 = "2 Assisted Living"
 3 = "3 Special Care Unit"
 4 = "4 Nursing Home"
 8 = "8 Not Reported" ;

VALUE resid
-9 = '-9 Missing'
-8 = "-8 DK"
-7 = "-7 RF"
```

## SAS ALGORITHM FOR DEMENTIA

```
-1 = "-1 Inapplicable"
1 = "Community"
2 = "Residential care not nursing home (SP interview)"
3 = "Residential care not nursing home (FQ only)"
4 = "Nursing home (SP interview)"
5 = "Nursing home (FQ only)"
6 = "Deceased"
7 = "Residential care not nursing home in R1 and R2 (FQ only)"
8 = "Nursing home in R1 and R2 (FQ only)";

VALUE residlml
  1 = "1 Community"
  2 = "2 Residential care"
  -1 = "-1 Inapplicable"
-9 = '-9 Missing';

VALUE SP50139W
  1 = "1 White/Caucasian"
  2 = "2 Black/African American"
  3 = "3 Other"
  -7 = '-7 RF'
  -8 = '-8 DK'
  -9 = '-9 Missing';

VALUE Locat15w
  1= "1 Lives in same City and State as at age 15"
  2= "2 Lives in same state but different City (or DKRF city) as age
15"
  3= "3 Does not live in same State as age 15"
  -1= "-1 Inapplicable"
  -7 = '-7 RF'
  -8 = '-8 DK'
  -9 = '-9 Missing';

Value dresnew
  1 = "1 same residence as last int"
  2 = "2 new residence since last int"
  -1= "-1 Inapplicable"
  -7 = '-7 RF'
  -8 = '-8 DK'
  -9 = '-9 Missing';

Value dcontnew
  1 = "1 Continuing sample from R1"
  2 = "2 New sample in R5"
  -1= "-1 Inapplicable"
  -7 = '-7 RF'
  -8 = '-8 DK'
  -9 = '-9 Missing';

VALUE DMDDEVYR
  1 = ' 1 No Mobility device use in last year/since last interview'
  2 = ' 2 Mobility device use in last year/since last interview'
  -1 = '-1 Inapplicable '
  -7 = '-7 RF'
  -8 = '-8 DK'
  -9 = '-9 Missing';
```



## SAS ALGORITHM FOR DEMENTIA

### VALUE DMDEVST

```
0 = '0 less than 1 month of mobility device use'  
1 = '1 month of mobility device use'  
2 = '2 months of mobility device use'  
3 = '3 months of mobility device use'  
4 = '4 months of mobility device use'  
5 = '5 months of mobility device use'  
6 = '6 months of mobility device use'  
7 = '7 months of mobility device use'  
8 = '8 months of mobility device use'  
9 = '9 months of mobility device use'  
10 = '10 months of mobility device use'  
11 = '11 months of mobility device use'  
-7 = '-7 used last month but RF number of months of use in year'  
-8 = '-8 used last month but DK number of months of use in year'  
-1 = '-1 Inapplicable '  
-2 = '-2 Not asked of continuing sample';
```

### VALUE DMDEVEND

```
0 = '0 Between 11 and 12 months since device use ended'  
1 = '1 month since mobility device use ended'  
2 = '2 months since mobility device use ended'  
3 = '3 months since mobility device use ended'  
4 = '4 months since mobility device use ended'  
5 = '5 months since mobility device use ended'  
6 = '6 months since mobility device use ended'  
7 = '7 months since mobility device use ended'  
8 = '8 months since mobility device use ended'  
9 = '9 months since mobility device use ended'  
10 = '10 months since mobility device use ended'  
11 = '11 months since mobility device use ended'  
-7 = '-7 no use last month and RF number of months since device use  
ended'  
-8 = '-8 no use last month and DK number of months since device use  
ended'  
-1 = '-1 Inapplicable '  
-2 = '-2 Not asked of continuing sample' ;
```

### VALUE DMDHLPYR

```
1 = " 1 No mobility help in last year/since last interview"  
2 = " 2 Mobility help in last year/since last interview"  
-7 = " -7 RF"  
-8 = " -8 DK"  
-1 = " -1 Inapplicable "  
-2 = '-2 Not asked of continuing sample' ;
```

### VALUE DMDHLPST

```
0 = '0 less than 1 month of help'  
1 = '1 month of help'  
2 = '2 months of help'  
3 = '3 months of help'  
4 = '4 months of help'  
5 = '5 months of help'  
6 = '6 months of help'  
7 = '7 months of help'  
8 = '8 months of help'  
9 = '9 months of help'  
10 = '10 months of help'
```

## SAS ALGORITHM FOR DEMENTIA

```
11 = '11 months of help'
-7 = '-7 help last month but RF number of months of help in year'
-8 = '-8 help last month but DK number of months of help in year'
-1 = " -1 Inapplicable "
-2 = " -2 Not asked of continuing sample ";
VALUE DMDHLPEN
  0 = '0 less than 1 month since help ended'
  1 = '1 month since help ended'
  2 = '2 months since help ended'
  3 = '3 months since help ended'
  4 = '4 months since help ended'
  5 = '5 months since help ended'
  6 = '6 months since help ended'
  7 = '7 months since help ended'
  8 = '8 months since help ended'
  9 = '9 months since help ended'
 10 = '10 months since help ended'
 11 = '11 months since help ended'
-7 = '-7 no help last month and RF number of months since help ended'
-8 = '-8 no help last month and DK number of months since help ended'
-1 = '-1 Inapplicable '
-2 = '-2 Not asked of continuing sample';
VALUE DMHLPYRS
  0   = '0 none or less than 1 year'
 997 = '997 since birth'
-7   = '-7 RF'
-8   = '-8 DK'
-1   = '-1 Inapplicable '
-2   = '-2 Not asked of continuing sample'
-9   = '-9 Missing';
VALUE DSDHLPYR
  1 = ' 1 No self care help in last year/since last interview'
  2 = ' 2 Self care help in last year/since last interview'
-1 = '-1 Inapplicable'
-7 = '-7 DK'
-8 = '-8 RF'
-9 = '-9 Missing';
VALUE DSHLPND
  0 = ' 0 Between 11 and 12 months since self care help ended'
  1 = '1 Month since self care help ended'
  2 = '2 Months since self care help ended'
  3 = '3 Months since self care help ended'
  4 = '4 Months since self care help ended'
  5 = '5 Months since self care help ended'
  6 = '6 Months since self care help ended'
  7 = '7 Months since self care help ended'
  8 = '8 Months since self care help ended'
  9 = '9 Months since self care help ended'
 10 = '10 Months since self care help ended'
 11 = '11 Months since self care help ended'
-7 = '-7 No help last month and RF number of months since help ended'
-8 = '-8 No help last month and DK number of months since help ended'
-1 = '-1 Inapplicable'
-2 = '-2 Not asked of continuing sample'
-9 = '-9 Missing'      ;
VALUE DSHLPYRS
```

## SAS ALGORITHM FOR DEMENTIA

```
    0 = ' 0 None or less than 1 year of self care help'  
   -7 = '-7 RF'  
   -8 = '-8 DK'  
   -1 = '-1 Inapplicable'  
     -2 = '-2 Not asked of continuing sample'  
   -9 = '-9 Missing'  
   997 = '997 since birth';  
VALUE SP5RH7W  
   -7 = '-7 RF'  
   -8 = '-8 DK'  
   -1 = '-1 Inapplicable'  
   -9 = '-9 Missing'  
     1 = "1 As an overnight patient in a hospital, nursing home, or  
rehab facility"  
     2 = "2 At an outpatient center, clinic, or doctors office or  
therapists office"  
     3 = "3 At home"  
     4 = "4 Somewhere else" ;  
VALUE SP5LF5W  
   -7 = '-7 RF'  
   -8 = '-8 DK'  
   -1 = '-1 Inapplicable'  
   -9 = '-9 Missing'  
   997 = "997 Number of hours vary each week" ;  
  
VALUE DMH_GRP  
     1 = "1 Help started"  
     2 = "2 Help ended"  
     3 = "3 Help both interviews with gap"  
     4 = "4 Help both interviews with no gap"  
     5 = "5 Help between interviews only"  
     6 = "6 No help either interview or between"  
    11 = "11 Help started (month started missing)"  
    21 = "21 Help ended (month ended missing)"  
    41 = "41 Help both interviews (DK whether gap)"  
    61 = "61 No help either interview (DK whether help between)"  
    -9 = "-9 Missing"  
    -1 = "-1 Inapplicable"  
      -3 = "-3 Not asked of new sample"  
   -999 = "-999 Not determined" ;  
  
VALUE DMU_GRP  
     1 = "1 Use started"  
     2 = "2 Use ended"  
     3 = "3 Use both interviews with gap"  
     4 = "4 Use both interviews with no gap"  
     5 = "5 Use between interviews only "  
     6 = "6 No use either interview or between"  
    11 = "11 Use started (month started missing)"  
    21 = "21 Use ended (month ended missing)"  
    41 = "41 Use both interviews (DK whether gap)"  
    61 = "61 No use either interview (DK whether use between)"  
    -9 = "-9 Missing"  
    -1 = "-1 Inapplicable"  
      -3 = "-3 Not asked of new sample"  
   -999 = "-999 Not determined" ;
```

## SAS ALGORITHM FOR DEMENTIA

```

VALUE DMDS5FLG
-1 = "-1 Inapplicable"
  -3 = "-3 Not asked of new sample"
  0 = "0 No current SP interview"
  1 = "1 No SP interview last round"
  2 = "2 Died and month death missing"
  3 = "3 Died <=1 month after last interview"
  4 = "4 Died 12-13 months after last interview"
  7 = "7 Skipped 1 or more help questions" ;

VALUE DS_GRP
  1 = "1 Help started"
  2 = "2 Help ended"
  3 = "3 Help both interviews with gap"
  4 = "4 Help both interviews with no gap"
  5 = "5 Help between interviews only"
  6 = "6 No help either interview or between"
 11 = "11 Help started (month started missing)"
 21 = "21 Help ended (month ended missing)"
 41 = "41 Help both interviews (DK whether gap)"
 61 = "61 No help either interview (DK whether help between)"
-9 = "-9 Missing"
-1 = "-1 Inapplicable"
  -3 = "-3 Not asked of new sample"
-999 = "-999 Not determined" ;

value groupmo 1 = "1 Started"
  2 = "2 Ended"
  3 = "3 Both times with gap"
  4 = "4 Both times no gap"
  5 = "5 Between only (end missing)"
  6 = "6 Neither time AND not between"
 11 = "11 Started (start missing)"
 21 = "21 Ended (end missing)"
 41 = "41 Both times (gap missing)"
 61 = "61 Neither time (between missing)"
  -1= "-1 Inapplicable"
  -3=" -3 Not asked of new sample"
  -7= "-7 RF"
  -8= "-8 DK"
  -9= "-9 Missing"
-999 = "-999 Not determined"
-99 = "-99 Partial" ;

VALUE nw_mths 0 = "0 Less than 1 month"
  1 ="1 month"
  2 ="2 months"
  3 ="3 months"
  4 ="4 months"
  5 ="5 months"
  6 ="6 months"
  7 ="7 months"
  8 ="8 months"
  9 ="9 months"
 10= "10 months"
 11= "11 months"
 12= "12 months"

```

## SAS ALGORITHM FOR DEMENTIA

```
13= "13 months"
14= "14 months"
15= "15 months"
16= "16 months"
17= "17 months"
18= "18 months"
19= "19 months"
20= "20 months"
90= "90 Last round disputed"
999= "999 No months"
-1= "-1 Inapplicable"
  -3= "-3 Not asked of new sample"
-7= "-7 RF"
-8= "-8 DK"
-9= "-9 Missing"
-10= "-10 Not ascertained"
-12= "-12 Outside of range (greater than months between
interviews)"
-13= "-13 None"
-999= "-999 Not determined"
-99= "-99 Partial";
  VALUE chntinh
  1 = "1 Yes, not in household"
  -1= "-1 Inapplicable"
  -7= "-7 RF"
  -8= "-8 DK"
  -9= "-9 Missing";
  Value d4mssadd
-1= '-1 Inapplicable'
  0='0 no flags and added at undetermined section'
  1='1 no flags and added at CL section'
  2='2 no flags and added at DT section'
  3='3 no flags and added at EW section'
  4='4 no flags and added at HA section'
  5='5 no flags and added at HO section'
  6='6 no flags and added at MC section'
  7='7 no flags and added at MO section'
  8='8 no flags and added at PA section'
  9='9 no flags and added at PE section'
 10='10 no flags and added at SC section'
 11='11 no flags and added at SN section'
 12='12 no flags and added at CS section'
 13='13 no flags and added at HH section'
 14='14 no flags and added at IS section'
 15='15 no flags and added at HL section'
 16='16 no flags and added at SL section';
  VALUE HA5DWHL
    1 = "1 Meals on wheels last month"
    -1 = "-1 Inapplicable";
  VALUE HA5DTKO
    1 = "1 Restaurant or take out last month"
    -1 = "-1 Inapplicable";
  VALUE RE5BLDG
    -7 = '-7 RF'
    -8 = '-8 DK'
    -1 = '-1 Inapplicable'
    -9 = '-9 Missing'
```

## SAS ALGORITHM FOR DEMENTIA

```

        1 = "1 Building has one floor"
        2 = "2 Building has multiple floors" ;
VALUE S000163W
    1 = "1 PRIVACY MORE IMPORTANT"
    2 = "2 SOCIALIZE MORE IMPORTANT"
    3 = "3 BOTH IMPORTANT/CANT CHOOSE/DONT KNOW"
        -1= "-1 Inapplicable"
        -7= "-7 RF"
        -8= "-8 DK"
        -9= "-9 Missing";

VALUE S000164W
    1 = "1 SOCIALIZE MORE IMPORTANT"
    2 = "2 PRIVACY MORE IMPORTANT"
    3 = "3 BOTH IMPORTANT/CANT CHOOSE/DONT KNOW"
        -1= "-1 Inapplicable"
        -7= "-7 RF"
        -8= "-8 DK"
        -9= "-9 Missing";

VALUE S000165W
    1 = "1 BEING SAFE MORE IMPORTANT"
    2 = "2 HAVING CHOICES MORE IMPORTANT"
    3 = "3 BOTH IMPORTANT/CANT CHOOSE/DONT KNOW"
    -1= "-1 Inapplicable"
    -7= "-7 RF"
    -8= "-8 DK"
    -9= "-9 Missing" ;

VALUE S000166W
    1 = "1 HAVING CHOICES MORE IMPORTANT"
    2 = "2 BEING SAFE MORE IMPORTANT"
    3 = "3 BOTH IMPORTANT/CANT CHOOSE/DONT KNOW"
    -1= "-1 Inapplicable"
    -7= "-7 RF"
    -8= "-8 DK"
    -9= "-9 Missing" ;

VALUE S000167W
    1 = "1 PRIVACY MORE IMPORTANT"
    2 = "2 BEING SAFE MORE IMPORTANT"
    3 = "3 BOTH IMPORTANT/CANT CHOOSE/DONT KNOW"
    -1= "-1 Inapplicable"
    -7= "-7 RF"
    -8= "-8 DK"
    -9= "-9 Missing" ;

VALUE S000168W
    1 = "1 BEING SAFE MORE IMPORTANT"
    2 = "2 PRIVACY MORE IMPORTANT"
    3 = "3 BOTH IMPORTANT/CANT CHOOSE/DONT KNOW"
    -1= "-1 Inapplicable"
    -7= "-7 RF"
    -8= "-8 DK"
    -9= "-9 Missing" ;

VALUE S000169W
```

## SAS ALGORITHM FOR DEMENTIA

```
1 = "1 SOCIALIZING MORE IMPORTANT"  
2 = "2 HAVING CHOICES MORE IMPORTANT"  
3 = "3 BOTH IMPORTANT/CANT CHOOSE/DONT KNOW"  
-1= "-1 Inapplicable"  
-7= "-7 RF"  
-8= "-8 DK"  
-9= "-9 Missing" ;
```

VALUE S000170W

```
1 = "1 HAVING CHOICES MORE IMPORTANT"  
2 = "2 SOCIALIZING MORE IMPORTANT"  
3 = "3 BOTH IMPORTANT/CANT CHOOSE/DONT KNOW"  
-1= "-1 Inapplicable"  
-7= "-7 RF"  
-8= "-8 DK"  
-9= "-9 Missing" ;
```

VALUE S000171W

```
1 = "1 PRIVACY MORE IMPORTANT"  
2 = "2 HAVING CHOICES MORE IMPORTANT"  
3 = "3 BOTH IMPORTANT/CANT CHOOSE/DONT KNOW"  
-1= "-1 Inapplicable"  
-7= "-7 RF"  
-8= "-8 DK"  
-9= "-9 Missing" ;
```

VALUE S000172W

```
1 = "1 HAVING CHOICES MORE IMPORTANT"  
2 = "2 PRIVACY MORE IMPORTANT"  
3 = "3 BOTH IMPORTANT/CANT CHOOSE/DONT KNOW"  
-1= "-1 Inapplicable"  
-7= "-7 RF"  
-8= "-8 DK"  
-9= "-9 Missing" ;
```

VALUE S000173W

```
1 = "1 SOCIALIZING MORE IMPORTANT"  
2 = "2 BEING SAFE MORE IMPORTANT"  
3 = "3 BOTH IMPORTANT/CANT CHOOSE/DONT KNOW"  
-1= "-1 Inapplicable"  
-7= "-7 RF"  
-8= "-8 DK"  
-9= "-9 Missing" ;
```

VALUE S000174W

```
1 = "1 BEING SAFE MORE IMPORTANT"  
2 = "2 SOCIALIZING MORE IMPORTANT"  
3 = "3 BOTH IMPORTANT/CANT CHOOSE/DONT KNOW"  
-1= "-1 Inapplicable"  
-7= "-7 RF"  
-8= "-8 DK"  
-9= "-9 Missing" ;
```

VALUE S000175W

```
1 = "1 LESS THAN 1 HOUR"  
2 = "2 MORE THAN 1 HOUR"  
3 = "3 ABOUT 1 HOUR"
```

## SAS ALGORITHM FOR DEMENTIA

```
-1= "-1 Inapplicable"  
-7= "-7 RF"  
-8= "-8 DK"  
-9= "-9 Missing" ;
```

```
VALUE S000176W  
 1 = "1 LESS THAN 15 MINUTES"  
 2 = "2 15 MINUTES"  
 3 = "3 BETWEEN 15 AND 30 MINUTES"  
 4 = "4 30 MINUTES"  
 5 = "5 BETWEEN 30 AND 45 MINUTES"  
 6 = "6 45 MINUTES"  
 7 = "7 BETWEEN 45 AND 60 MINUTES"  
-1= "-1 Inapplicable"  
-7= "-7 RF"  
-8= "-8 DK"  
-9= "-9 Missing" ;
```

```
VALUE S000177W  
 1 = "1 ABOUT 1 HOURS"  
 2 = "2 ABOUT 2 HOURS"  
 3 = "3 ABOUT 3 HOURS"  
 4 = "4 ABOUT 4 HOURS"  
 5 = "5 ABOUT 5 HOURS"  
 6 = "6 6 OR MORE HOURS"  
-1= "-1 Inapplicable"  
-7= "-7 RF"  
-8= "-8 DK"  
-9= "-9 Missing" ;
```

```
VALUE W600001W  
-7 = '-7 RF'  
-8 = '-8 DK'  
-1 = '-1 Inapplicable'  
-9 = '-9 Missing'  
 1 = "1 STRONGLY AGREE"  
 2 = "2 AGREE"  
 3 = "3 DISAGREE"  
 4 = "4 STRONGLY DISAGREE";
```

```
VALUE W600002W  
-7 = '-7 RF'  
-8 = '-8 DK'  
-1 = '-1 Inapplicable'  
-9 = '-9 Missing'  
 0 = "0 NONE"  
 1 = "1 1-2"  
 2 = "2 3-5"  
 3 = "3 6-10"  
 4 = "4 11-15"  
 5 = "5 16-20"  
 6 = "6 MORE THAN 20";
```

```
VALUE W600003W  
-7 = '-7 RF'  
-8 = '-8 DK'  
-1 = '-1 Inapplicable'  
-9 = '-9 Missing'  
 1 = "1 A (picture showing 4 pills)"
```



## SAS ALGORITHM FOR DEMENTIA

```
2 = "2 B (picture showing 8 pills)"
3 = "3 C (picture showing 12 pills)"
4 = "4 D (picture showing 16 pills)"
5 = "5 E (picture showing 20 pills)"
6 = "6 F (picture showing 24 pills)";

    VALUE YNF
-7 = '-7 RF'
-8 = '-8 DK'
-1 = '-1 Inapplicable'
-9 = '-9 Missing'
1 = "1 Yes"
2 = "2 No";
    VALUE FQ6DLOCA
1 = "1 Independent Living"
2 = "2 Assisted Living"
3 = "3 Special Care Unit"
4 = "4 Nursing home"
-8 = "-8 Not reported"
-1 = "-1 Inapplicable";
    VALUE R6DRES1A
1 = '1 Community'
2 = '2 Residential Care'
-1 = '-1 Inapplicable'
-9 = '-9 Missing';
        VALUE SP30023W
-7 = '-7 RF'
-8 = '-8 DK'
-1 = '-1 Inapplicable'
-9 = '-9 Missing'
1 = "1 Building has one floor"
2 = "2 Building has multiple floors" ;
        VALUE RE5BLDG
-7 = '-7 RF'
-8 = '-8 DK'
-1 = '-1 Inapplicable'
-9 = '-9 Missing'
1 = "1 Building has one floor"
2 = "2 Building has multiple floors" ;
    VALUE WORDRECC
-1 = '-1 Inapplicable'
-2 = '-2 Proxy says cannot ask SP'
-3 = '-3 Proxy says can ask SP but SP unable to answer'
-7 = '-7 SP refused activity'
-9 = '-9 Missing';
    VALUE OLDMTHS
-7 = '-7 RF'
-8 = '-8 DK'
-1 = '-1 Inapplicable'
-9 = '-9 Missing';
        VALUE MONTHS
-7 = '-7 RF'
-8 = '-8 DK'
-1 = '-1 Inapplicable'
-9 = '-9 Missing';
            VALUE FLAGS
-1 = "-1 Inapplicable"
```

## SAS ALGORITHM FOR DEMENTIA

```
        -3 = "-3 Not asked of new sample"
        0 = "0 No current SP interview"
        1 = "1 No SP interview last round"
        2 = "2 Died and month death missing"
        3 = "3 Died <=1 month after last interview"
        4 = "4 Died 12-13 months after last interview"
        7 = "7 Skipped 1 or more help questions" ;

VALUE DMDEVUSE
    0 = '0 none or less than 1 year'
    997 = '997 since birth'
    -7 = '-7 RF'
    -8 = '-8 DK'
    -1 = '-1 Inapplicable '
    -2 = '-2 Not asked of continuing sample'
    -9 = '-9 Missing';

VALUE SPPB_MISSING
    -7 = '-7 RF'
-8 = '-8 DK'
-9 = '-9 Missing'
-1="-1 Inapplicable"
1="1 Proxy interview"
2="2 Missing walk and repeat chair and balance"
3="3 Missing walk and repeat chair"
4="4 Missing walk and balance"
5="5 Missing repeat chair and balance"
6="6 Missing walk"
7="7 Missing repeat chair"
8="8 Missing balance"
9="9 No space"
10="10 No chair"
11="11 No space walk and no chair"
12="12 No space walk and non-safety missing"
13="13 No chair and non-safety missing"
14="14 Non-safety walk"
15="15 Non-safety chair"
16="16 Non-safety balance"
17="17 Non-safety walk and chair"
18="18 Non-safety walk and balance"
19="19 Non-safety chair and balance"
20="20 Non-safety walk and chair and balance";

VALUE W700BC2W
-7 = '-7 RF'
-8 = '-8 DK'
-1 = '-1 Ineligible'
-9 = '-9 Missing'
1 = "1 Eligible and consented"
2 = "2 Eligible and did not consent"
3 = "3 Ineligible, proxy respondent";

Value LMLHELPR
1 = '1 Yes'
2 = '2 No'
-8 = '-8 DK'
-7 = '-7 RF'
-2 = '-2 Helper is relative'
-1 = '-1 Inapplicable';

run;
```

## SAS ALGORITHM FOR DEMENTIA

```
/*=====*/  
/* NHATS_Round_8_Combined_PROC_FORMAT_Statement.sas */  
  
PROC FORMAT ;  
  
VALUE release  
  -1 = '-1 Inapplicable'  
  1 = '1 Main Sample'  
  2 = '2 Reserve Sample'  
  9 = '9 New Release Sample';  
  
VALUE STAT_DTa  
  4 = " 4 April"  
  5 = " 5 May"  
  6 = " 6 June"  
  7 = " 7 July"  
  8 = " 8 August"  
  9 = " 9 September"  
 10 = "10 October"  
 11 = "11 November"  
 99 = "99 Prior to start of field work"  
 -1 = '-1 Inapplicable';  
  
VALUE $DISP  
  '10' = "10 Not Available "  
  '11' = "11 Ready"  
  '12' = "12 Started "  
  '20' = "20 Final "  
  '24' = "24 Not Required "  
  '60' = "60 Complete "  
  '61' = "61 Complete, NH facility"  
  '62' = "62 Complete SP Deceased, Proxy Intv"  
  '63' = "63 Complete SP, FQ not complete"  
  '64' = "64 Complete FQ, SP not complete"  
  '75' = "75 Physically/mentally unable to participate, no proxy"  
  '76' = "76 Too ill to participate, no proxy"  
  '77' = "77 Refusal, SP"  
  '78' = "78 Language barrier"  
  '79' = "79 Unable to locate"  
  '80' = "80 Unavailable during field period"  
  '82' = "82 Outside of PSU"  
  '83' = "83 Ineligible"  
  '85' = "85 Refusal, facility"  
  '86' = "86 Deceased"  
  '87' = "87 Refusal, proxy"  
  '88' = "88 Work stopped" ;  
  
VALUE DISP_a  
  10 = "10 Not Available"  
  11 = "11 Ready"  
  12 = "12 Started"  
  20 = "20 Final"  
  24 = "24 Not Required"  
  60 = "60 Complete"  
  61 = "61 Complete, NH facility"  
  62 = "62 Complete SP Deceased, Proxy Intv"
```

## SAS ALGORITHM FOR DEMENTIA

```
63 = "63 Complete SP, FQ not complete"  
64 = "64 Complete FQ, SP not complete "  
75 = "75 Physically/mentally unable to participate, no proxy"  
76 = "76 Too ill to participate, no proxy"  
77 = "77 Refusal, SP"  
78 = "78 Language barrier"  
79 = "79 Unable to locate"  
80 = "80 Unavailable during field period"  
82 = "82 Outside of PSU"  
83 = "83 Ineligible"  
85 = "85 Refusal, facility"  
86 = "86 Deceased"  
87 = "87 Refusal, proxy"  
88 = "88 Work stopped" ;
```

```
VALUE DISP_  
10 = "10 Not Available"  
11 = "11 Ready"  
12 = "12 Started"  
20 = "20 Final"  
24 = "24 Not Required";
```

```
VALUE DISP_F  
-1 = '-1 Inapplicable'  
10 = "10 Not Available"  
11 = "11 Ready"  
12 = "12 Started"  
20 = "20 Final"  
24 = "24 Not Required"  
60 = "60 Complete"  
61 = "61 Complete, NH facility"  
62 = "62 Complete SP Deceased, Proxy Intv"  
63 = "63 Complete SP, FQ not complete"  
64 = "64 Complete FQ, SP not complete "  
75 = "75 Physically/mentally unable to participate, no proxy"  
76 = "76 Too ill to participate, no proxy"  
77 = "77 Refusal, SP"  
78 = "78 Language barrier"  
79 = "79 Unable to locate"  
80 = "80 Unavailable during field period"  
81 = "81 Final deceased, new sample only"  
82 = "82 Outside of PSU"  
83 = "83 Ineligible"  
85 = "85 Refusal, facility"  
86 = "86 Deceased"  
87 = "87 Refusal, proxy"  
88 = "88 Work stopped"  
89 = "89 Final, Other Specify";
```

```
VALUE RFDK  
-7 = '-7 RF'  
-8 = '-8 DK'  
-1 = '-1 Inapplicable'  
-9 = '-9 Missing';
```

```
VALUE $RFDK_F  
'-7' = '-7 RF'
```

## SAS ALGORITHM FOR DEMENTIA

```
'-8' = '-8 DK'  
'-1' = '-1 Inapplicable'  
'-9' = '-9 Missing';
```

```
VALUE RFDK_F  
-7 = '-7 RF'  
-8 = '-8 DK'  
-1 = '-1 Inapplicable'  
-9 = '-9 Missing';
```

```
VALUE RFDK_B  
-1 = '-1 Inapplicable'  
1 = '1 Yes-Breakoff';
```

```
VALUE $RFDK_C  
'-1' = '-1 Inapplicable'  
'CL' = 'CL - Closing'  
'EW' = 'EW - Economic Well-Being'  
'FQ' = 'FQ - Facility Questionnaire'  
'HL' = 'HL - Helper'  
'HW' = 'HW - Height and Weight'  
'IP' = 'IP - Insurance Plans'  
'LF' = 'LF - Labor Force'  
'PA' = 'PA - Participation'  
'PE' = 'PE - Performance'  
'WB' = 'WB - Well-being' ;
```

```
VALUE $RFDK_2C  
'-1' = '-1 Inapplicable'  
'-7' = '-7 RF'  
'-8' = '-8 DK'  
'-9' = '-9 Missing';
```

```
VALUE RFDK_Y  
1 = '1 Yes'  
-7 = '-7 RF'  
-8 = '-8 DK'  
-1 = '-1 Inapplicable'  
-9 = '-9 Missing';
```

```
VALUE RFDK_I  
0 = '0 No'  
1 = '1 Yes'  
-7 = '-7 RF'  
-8 = '-8 DK'  
-1 = '-1 Inapplicable'  
-9 = '-9 Missing';
```

```
VALUE RFDK_YN  
1 = '1 Yes'  
2 = '2 No'  
-7 = '-7 RF'  
-8 = '-8 DK'  
-1 = '-1 Inapplicable'  
-9 = '-9 Missing';
```

```
VALUE DSTRP_G
```

## SAS ALGORITHM FOR DEMENTIA

```
-7 = '-7 RF'
-8 = '-8 DK'
-1 = '-1 Inapplicable'
-9 = '-9 Missing'
1 = '1 X condition and word color condition accuracy below threshold
(less than .42)'
2 = '2 word condition only below threshold (less than .42)'
3 = '3 X condition and word color condition meet criteria for accuracy'
4 = '4 fewer than 50% of X and word color condition trials answered'
999 = '999 X condition only below threshold (less than .42)';

VALUE DSTRP_R
-7 = '-7 RF'
-8 = '-8 DK'
-1 = '-1 Inapplicable'
-999 = '-999 Inapplicable'
other = 'Values ranging between -.353 and 1.115';

VALUE DSTRP_M
-7 = '-7 RF'
-8 = '-8 DK'
-1 = '-1 Inapplicable'
-999 = '-999 Inapplicable'
other = 'Values ranging between -544.732 and 924.863';

VALUE FQ_4F
-7 = '-7 RF'
-8 = '-8 DK'
-1 = '-1 Inapplicable'
-9 = '-9 Missing'
    1='1 YES'
    2='2 NO';

VALUE CHILDDEC
1 = '1 CHILD DECEASED'
-7 = '-7 RF'
-8 = '-8 DK'
-1 = '-1 Inapplicable'
-9 = '-9 Missing';

VALUE W200001W
12 = "12 STARTED"
20 = "20 COMPLETE"
21 = "21 INELIGIBLE - NOT 65+" ;

VALUE W200008x
-7 = '-7 RF'
-8 = '-8 DK'
-1 = '-1 Inapplicable'
-9 = '-9 Missing'
1 = "1 UNDER 20"
2 = "2 20-24"
3 = "3 25-29"
4 = "4 30-34"
5 = "5 35-39"
6 = "6 40-44"
7 = "7 45-49"
```

## SAS ALGORITHM FOR DEMENTIA

```
8 = "8 50-54"  
9 = "9 55-59"  
10 = "10 60-64"  
11 = "11 65-69"  
12 = "12 70-74"  
13 = "13 75-79"  
14 = "14 80-84"  
15 = "15 85-89"  
16 = "16 90 +";  
  
VALUE W200009W  
-7 = '-7 RF'  
-8 = '-8 DK'  
-1 = '-1 Inapplicable'  
-9 = '-9 Missing'  
1 = "1 SAMPLE PERSON"  
2 = "2 SPOUSE/ PARTNER"  
3 = "3 DAUGHTER"  
4 = "4 SON"  
5 = "5 DAUGHTER-IN-LAW"  
6 = "6 SON-IN-LAW"  
7 = "7 STEPDAUGHTER"  
8 = "8 STEPSON"  
9 = "9 SISTER"  
10 = "10 BROTHER"  
11 = "11 SISTER-IN-LAW"  
12 = "12 BROTHER-IN-LAW"  
13 = "13 MOTHER"  
14 = "14 STEPMOTHER"  
15 = "15 MOTHER-IN-LAW"  
16 = "16 FATHER"  
17 = "17 STEPFATHER"  
18 = "18 FATHER-IN-LAW"  
19 = "19 GRANDDAUGHTER"  
20 = "20 GRANDSON"  
21 = "21 NIECE"  
22 = "22 NEPHEW"  
23 = "23 AUNT"  
24 = "24 UNCLE"  
25 = "25 COUSIN"  
26 = "26 STEPDAUGHTER'S SON/ DAUGHTER"  
27 = "27 STEPSON'S SON/ DAUGHTER"  
28 = "28 DAUGHTER-IN-LAW'S SON/ DAUGHTER"  
29 = "29 SON-IN-LAW'S SON/ DAUGHTER"  
30 = "30 BOARDER/RENTER"  
31 = "31 PAID AIDE/ HOUSEKEEPER/ EMPLOYEE"  
32 = "32 ROOMMATE"  
33 = "33 EX-WIFE/ EX-HUSBAND"  
34 = "34 BOYFRIEND/ GIRLFRIEND"  
35 = "35 NEIGHBOR"  
36 = "36 FRIEND"  
37 = "37 SOMEONE/SERVICE AT THE PLACE SP LIVES/LIVED"  
38 = "38 CO-WORKER"  
39 = "39 MINISTER, PRIEST, OR OTHER CLERGY"  
40 = "40 PSYCHIATRIST, PSYCHOLOGIST, COUNSELOR, OR THERAPIST"  
41 = "41 DECEASED SPOUSE/PARTNER"  
91 = "91 OTHER RELATIVE"
```

## SAS ALGORITHM FOR DEMENTIA

```
    92 = "92 OTHER NONRELATIVE"    ;

VALUE W200002W
-7 = '-7 RF'
-8 = '-8 DK'
-1 = '-1 Inapplicable'
-9 = '-9 Missing'
 1 = "1 MALE"
 2 = "2 FEMALE";

VALUE W200005W
-7 = '-7 RF'
-8 = '-8 DK'
-1 = '-1 Inapplicable'
-9 = '-9 Missing'
 1 = "1 NO SCHOOLING COMPLETED"
 2 = "2 1ST-8TH GRADE"
 3 = "3 9TH-12TH GRADE (NO DIPLOMA)"
 4 = "4 HIGH SCHOOL GRADUATE (HIGH SCHOOL DIPLOMA OR EQUIVALENT)"
 5 = "5 VOCATIONAL, TECHNICAL, BUSINESS, OR TRADE SCHOOL CERTIFICATE OR
DIPLOMA (BEYOND HIGH SCHOOL LEVEL)"
 6 = "6 SOME COLLEGE BUT NO DEGREE"
 7 = "7 ASSOCIATE'S DEGREE"
 8 = "8 BACHELOR'S DEGREE"
 9 = "9 MASTER'S, PROFESSIONAL, OR DOCTORAL DEGREE"    ;

VALUE W200010W
-7 = '-7 RF'
-8 = '-8 DK'
-1 = '-1 Inapplicable'
-9 = '-9 Missing'
 1 = "1 MARRIED"
 2 = "2 LIVING WITH A PARTNER"
 3 = "3 SEPARATED"
 4 = "4 DIVORCED"
 5 = "5 WIDOWED"
 6 = "6 NEVER MARRIED";

VALUE W200011W
-7 = '-7 RF'
-8 = '-8 DK'
-1 = '-1 Inapplicable'
-9 = '-9 Missing'
 1 = "1 YES"
 2 = "2 NO"
 7 = "7 PREVIOUSLY REPORTED"    ;

VALUE W200012W
-7 = '-7 RF'
-8 = '-8 DK'
-1 = '-1 Inapplicable'
-9 = '-9 Missing'
 1 = "1 REGULAR"
 2 = "2 VARIED"    ;

VALUE W200013W
-7 = '-7 RF'
-8 = '-8 DK'
```



## SAS ALGORITHM FOR DEMENTIA

```
-1 = '-1 Inapplicable'  
-9 = '-9 Missing'  
1 = "1 SP AND/OR FAMILY"  
2 = "2 GOVERNMENT PROGRAM"  
3 = "3 INSURANCE"  
91 = "91 OTHER (SPECIFY)" ;
```

VALUE W200015W

```
-7 = '-7 RF'  
-8 = '-8 DK'  
-1 = '-1 Inapplicable'  
-9 = '-9 Missing'  
1='1 HOURLY'  
2='2 WEEKLY'  
3='3 MONTHLY'  
4='4 DID NOT PAY IN LAST MONTH'  
91 = "91 OTHER (SPECIFY)" ;
```

VALUE W200016W

```
-7 = '-7 RF'  
-8 = '-8 DK'  
-1 = '-1 Inapplicable'  
-9 = '-9 Missing'  
1 = "1 MEDICAID"  
2 = "2 MEDICARE"  
3 = "3 STATE PROGRAM"  
91 = "91 OTHER (SPECIFY)" ;
```

VALUE W200018W

```
-7 = '-7 RF'  
-8 = '-8 DK'  
-1 = '-1 Inapplicable'  
-9 = '-9 Missing'  
1 = "1 FREE-STANDING (DETACHED) SINGLE HOUSE"  
2 = "2 SINGLE HOUSE BUT ATTACHED TO OTHERS (ROW HOUSE, TOWNHOUSE, DUPLEX,  
TRIPLEX, OR TRIPLE DECKER)"  
3 = "3 MOBILE HOME OR TRAILER"  
4 = "4 MULTI-UNIT (2+) BUILDING"  
91 = "91 OTHER (SPECIFY)" ;
```

VALUE W200020W

```
-7 = '-7 RF'  
-8 = '-8 DK'  
-1 = '-1 Inapplicable'  
-9 = '-9 Missing'  
1 = "1 HOME"  
2 = "2 MULTI-UNIT"  
3 = "3 OTHER" ;
```

VALUE W200021W

```
-7 = '-7 RF'  
-8 = '-8 DK'  
-1 = '-1 Inapplicable'  
-9 = '-9 Missing'  
1 = "1 BUILDING HAS ONE FLOOR"  
2 = "2 BUILDING HAS MULTIPLE FLOORS" ;
```

## SAS ALGORITHM FOR DEMENTIA

VALUE W200022W

-7 = '-7 RF'  
-8 = '-8 DK'  
-1 = '-1 Inapplicable'  
-9 = '-9 Missing'  
1 = "1 HOME"  
2 = "2 APARTMENT"  
3 = "3 ROOM"  
4 = "4 UNIT"  
5 = "5 SUITE"  
6 = "6 SOMETHING ELSE (SPECIFY)" ;

VALUE W200030W

-7 = '-7 RF'  
-8 = '-8 DK'  
-1 = '-1 Inapplicable'  
-9 = '-9 Missing'  
1 = "1 SAMPLE PERSON (SP)"  
2 = "2 PROXY" ;

VALUE W200032W

-7 = '-7 RF'  
-8 = '-8 DK'  
-1 = '-1 Inapplicable'  
-9 = '-9 Missing'  
1 = "1 HOSPITAL"  
2 = "2 NURSING HOME/REHAB CENTER"  
91 = "91 OTHER (SPECIFY)" ;

VALUE W200035W

-1 = '-1 Inapplicable'  
-9 = '-9 Missing'  
1 = "1 SELF"  
2 = "2 SPOUSE/ PARTNER"  
3 = "3 DAUGHTER"  
4 = "4 SON"  
5 = "5 DAUGHTER-IN-LAW"  
6 = "6 SON-IN-LAW"  
7 = "7 STEPDAUGHTER"  
8 = "8 STEPSON"  
9 = "9 SISTER"  
10 = "10 BROTHER"  
11 = "11 SISTER-IN-LAW"  
12 = "12 BROTHER-IN-LAW"  
13 = "13 MOTHER"  
14 = "14 STEPMOTHER"  
15 = "15 MOTHER-IN-LAW"  
16 = "16 FATHER"  
17 = "17 STEPFATHER"  
18 = "18 FATHER-IN-LAW"  
19 = "19 GRANDDAUGHTER"  
20 = "20 GRANDSON"  
21 = "21 NIECE"  
22 = "22 NEPHEW"  
23 = "23 AUNT"  
24 = "24 UNCLE"  
25 = "25 COUSIN"

## SAS ALGORITHM FOR DEMENTIA

```
26 = "26 STEPDAUGHTER'S SON/ DAUGHTER"  
27 = "27 STEPSON'S SON/ DAUGHTER"  
28 = "28 DAUGHTER-IN-LAW'S SON/ DAUGHTER"  
29 = "29 SON-IN-LAW'S SON/ DAUGHTER"  
30 = "30 BOARDER/RENTER"  
31 = "31 PAID AIDE/ HOUSEKEEPER/ EMPLOYEE"  
32 = "32 ROOMMATE"  
33 = "33 EX-WIFE/ EX-HUSBAND"  
34 = "34 BOYFRIEND/ GIRLFRIEND"  
35 = "35 NEIGHBOR"  
36 = "36 FRIEND"  
37 = "37 SOMEONE/SERVICE FROM THE PLACE SP LIVES/DIED"  
38 = "38 CO-WORKER"  
39 = "39 MINISTER, PRIEST, OR OTHER CLERGY"  
40 = "40 PSYCHIATRIST, PSYCHOLOGIST, COUNSELOR, OR THERAPIST"  
91 = "91 OTHER RELATIVE"  
92 = "92 OTHER NONRELATIVE" ;
```

VALUE W200036W

```
-7 = '-7 RF'  
-8 = '-8 DK'  
-1 = '-1 Inapplicable'  
-9 = '-9 Missing'  
1 = "1 VERY FAMILIAR"  
2 = "2 SOMEWHAT FAMILIAR"  
3 = "3 A LITTLE FAMILIAR"  
4 = "4 NOT AT ALL FAMILIAR" ;
```

VALUE W200037W

```
-7 = '-7 RF'  
-8 = '-8 DK'  
-1 = '-1 Inapplicable'  
-9 = '-9 Missing'  
1 = "1 YES, SAME ADDRESS"  
2 = "2 NO, DIFFERENT ADDRESS"  
3 = "3 YES, SAME ADDRESS WITH MINOR CORRECTIONS" ;
```

VALUE W200038W

```
-7 = '-7 RF'  
-8 = '-8 DK'  
-1 = '-1 Inapplicable'  
-9 = '-9 Missing'  
1 = "1 JANUARY"  
2 = "2 FEBRUARY"  
3 = "3 MARCH"  
4 = "4 APRIL"  
5 = "5 MAY"  
6 = "6 JUNE"  
7 = "7 JULY"  
8 = "8 AUGUST"  
9 = "9 SEPTEMBER"  
10 = "10 OCTOBER"  
11 = "11 NOVEMBER"  
12 = "12 DECEMBER" ;
```

VALUE W200039W

```
-7 = '-7 RF'
```

## SAS ALGORITHM FOR DEMENTIA

```
-8 = '-8 DK'  
-1 = '-1 Inapplicable'  
-9 = '-9 Missing'  
1 = "1 2011"  
2 = "2 2012"  
3 = "3 YEAR2013"  
4 = "4 YEAR2014"  
5 = "5 YEAR2015"  
6 = "6 YEAR2016"  
7 = "7 YEAR2017"  
8 = "8 YEAR2018"  
9 = "9 YEAR2019"  
10 = "10 YEAR2020" ;
```

VALUE W200040W

```
-7 = '-7 RF'  
-8 = '-8 DK'  
-1 = '-1 Inapplicable'  
-9 = '-9 Missing'  
1 = "1 2011"  
2 = "2 2012" ;
```

VALUE W200041W

```
-7 = '-7 RF'  
-8 = '-8 DK'  
-1 = '-1 Inapplicable'  
-9 = '-9 Missing'  
1 = "1 AT SPS OR SOMEONE ELSE'S HOME"  
2 = "2 IN A HOSPITAL"  
3 = "3 IN A NURSING HOME"  
4 = "4 IN A HOSPICE RESIDENCE"  
5 = "5 IN TRANSIT (AMBULANCE TO HOSPITAL)"  
91 = "91 SOMEWHERE ELSE (SPECIFY)";
```

VALUE W200042W

```
-7 = '-7 RF'  
-8 = '-8 DK'  
-1 = '-1 Inapplicable'  
-9 = '-9 Missing'  
1 = "1 SP'S HOME"  
2 = "2 SOMEONE ELSE'S HOME" ;
```

VALUE W200043W

```
-7 = '-7 RF'  
-8 = '-8 DK'  
-1 = '-1 Inapplicable'  
-9 = '-9 Missing'  
1 = "1 INTENSIVE CARE UNIT"  
2 = "2 PALLIATIVE CARE UNIT"  
3 = "3 INPATIENT HOSPICE UNIT"  
4 = "4 EMERGENCY ROOM"  
5 = "5 ANOTHER KIND OF UNIT" ;
```

VALUE W200044W

```
-7 = '-7 RF'  
-8 = '-8 DK'  
-1 = '-1 Inapplicable'
```

## SAS ALGORITHM FOR DEMENTIA

```
-9 = '-9 Missing'  
1 = "1 HOSPICE AT A HOSPITAL"  
2 = "2 HOSPICE AT A NURSING HOME"  
3 = "3 RESIDENTIAL HOSPICE"  
4 = "4 OTHER HOSPICE" ;
```

VALUE W200045W

```
-7 = '-7 RF'  
-8 = '-8 DK'  
-1 = '-1 Inapplicable'  
-9 = '-9 Missing'  
1 = "1 DAYS"  
2 = "2 WEEKS"  
3 = "3 MONTHS"  
4 = "4 YEARS" ;
```

VALUE W200046W

```
-7 = '-7 RF'  
-8 = '-8 DK'  
-1 = '-1 Inapplicable'  
-9 = '-9 Missing'  
1 = "1 AT SP'S HOME"  
2 = "2 IN A HOSPITAL"  
3 = "3 IN A NURSING HOME"  
4 = "4 IN A HOSPICE RESIDENCE"  
91 = "91 SOMEWHERE ELSE (SPECIFY)" ;
```

VALUE W200047W

```
-7 = '-7 RF'  
-8 = '-8 DK'  
-1 = '-1 Inapplicable'  
-9 = '-9 Missing'  
1 = "1 EVERY DAY"  
2 = "2 MOST DAYS"  
3 = "3 SOME DAYS"  
4 = "4 RARELY"  
5 = "5 NOT AT ALL" ;
```

VALUE W200048W

```
-7 = '-7 RF'  
-8 = '-8 DK'  
-1 = '-1 Inapplicable'  
-9 = '-9 Missing'  
1 = "1 LESS THAN WAS NEEDED"  
2 = "2 MORE THAN WAS NEEDED"  
3 = "3 ABOUT RIGHT AMOUNT" ;
```

VALUE W200049W

```
-7 = '-7 RF'  
-8 = '-8 DK'  
-1 = '-1 Inapplicable'  
-9 = '-9 Missing'  
1 = "1 YES"  
2 = "2 NO"  
3 = "3 DOES NOT APPLY/NO CARE IN LAST MONTH OF LIFE" ;
```

VALUE W200050W

## SAS ALGORITHM FOR DEMENTIA

```
-7 = '-7 RF'  
-8 = '-8 DK'  
-1 = '-1 Inapplicable'  
-9 = '-9 Missing'  
1 = "1 ALWAYS"  
2 = "2 USUALLY"  
3 = "3 SOMETIMES"  
4 = "4 NEVER"  
5 = "5 DOES NOT APPLY/NO CARE IN LAST MONTH OF LIFE" ;
```

VALUE W200051W

```
-7 = '-7 RF'  
-8 = '-8 DK'  
-1 = '-1 Inapplicable'  
-9 = '-9 Missing'  
1 = "1 EXCELLENT"  
2 = "2 VERY GOOD"  
3 = "3 GOOD"  
4 = "4 FAIR"  
5 = "5 POOR" ;
```

VALUE W200052W

```
-7 = '-7 RF'  
-8 = '-8 DK'  
-1 = '-1 Inapplicable'  
-9 = '-9 Missing'  
1 = "1 NOT AT ALL"  
2 = "2 SEVERAL DAYS"  
3 = "3 MORE THAN HALF THE DAYS"  
4 = "4 NEARLY EVERY DAY" ;
```

VALUE W200053W

```
-7 = '-7 RF'  
-8 = '-8 DK'  
-1 = '-1 Inapplicable'  
-9 = '-9 Missing'  
1 = "1 EVERY NIGHT (7 NIGHTS A WEEK)"  
2 = "2 MOST NIGHTS (5-6 NIGHTS A WEEK)"  
3 = "3 SOME NIGHTS (2-4 NIGHTS A WEEK)"  
4 = "4 RARELY (ONCE A WEEK OR LESS)"  
5 = "5 NEVER" ;
```

VALUE W200054W

```
-7 = '-7 RF'  
-8 = '-8 DK'  
-1 = '-1 Inapplicable'  
-9 = '-9 Missing'  
1 = "1 EVERY NIGHT (7 NIGHTS A WEEK)"  
2 = "2 MOST NIGHTS (5-6 NIGHTS A WEEK)"  
3 = "3 SOME NIGHTS (2-4 NIGHTS A WEEK)"  
4 = "4 RARELY (ONCE A WEEK OR LESS)"  
5 = "5 NEVER"  
7 = "7 DON'T WAKE UP/NOT A PROBLEM" ;
```

VALUE W200055W

```
-7 = '-7 RF'  
-8 = '-8 DK'
```

## SAS ALGORITHM FOR DEMENTIA

```
-1 = '-1 Inapplicable'  
-9 = '-9 Missing'  
1 = "1 PRIVATE RESIDENCE"  
2 = "2 A GROUP HOME, BOARD AND CARE, OR SUPERVISED HOUSING"  
3 = "3 ASSISTED LIVING FACILITY OR CONTINUING CARE RETIREMENT COMMUNITY  
(CCRC)"  
4 = "4 RELIGIOUS GROUP QUARTERS"  
91 = "91 OTHER (SPECIFY)" ;
```

```
VALUE W200056W  
-7 = '-7 RF'  
-8 = '-8 DK'  
-1 = '-1 Inapplicable'  
-9 = '-9 Missing'  
1 = "1 YES"  
2 = "2 NO"  
7 = "7 PLACE DOES NOT HAVE A NAME" ;
```

```
VALUE W200057W  
-7 = '-7 RF'  
-8 = '-8 DK'  
-1 = '-1 Inapplicable'  
-9 = '-9 Missing'  
1 = "1 APARTMENT"  
2 = "2 ROOM"  
3 = "3 UNIT"  
4 = "4 SUITE"  
91 = "91 SOMETHING ELSE (SPECIFY)" ;
```

```
VALUE W200058W  
-7 = '-7 RF'  
-8 = '-8 DK'  
-1 = '-1 Inapplicable'  
-9 = '-9 Missing'  
1 = "1 YES"  
2 = "2 NO, DIFFERENT PERSON"  
3 = "3 NO, NAME MISPELLED" ;
```

```
VALUE W200060W  
-7 = '-7 RF'  
-8 = '-8 DK'  
-1 = '-1 Inapplicable'  
-9 = '-9 Missing'  
1 = "1 PRIVATE RESIDENCE"  
2 = "2 A GROUP HOME, BOARD AND CARE, OR SUPERVISED HOUSING"  
3 = "3 ASSISTED LIVING FACILITY OR CONTINUING CARE RETIREMENT COMMUNITY  
(CCRC)"  
5 = "5 NURSING HOME"  
91 = "91 OTHER (SPECIFY)" ;
```

```
VALUE W200061W  
-7 = '-7 RF'  
-8 = '-8 DK'  
-1 = '-1 Inapplicable'  
-9 = '-9 Missing'  
1 = "1 SEPARATION OR DIVORCE"  
2 = "2 DECEASED"
```

## SAS ALGORITHM FOR DEMENTIA

```
3 = "3 MOVED ELSEWHERE"  
5 = "5 LAST INTERVIEW INFORMATION INCORRECT"  
8 = "8 OTHER REASON" ;
```

```
VALUE W200067W  
-7 = '-7 RF'  
-8 = '-8 DK'  
-1 = '-1 Inapplicable'  
-9 = '-9 Missing'  
1 = "1 COMMON OR SHARED ENTRANCE"  
2 = "2 ENTRANCE DIRECTLY INTO HOME" ;
```

```
VALUE W200068W  
-7 = '-7 RF'  
-8 = '-8 DK'  
-1 = '-1 Inapplicable'  
-9 = '-9 Missing'  
1 = "1"  
2 = "2"  
3 = "3"  
4 = "4+" ;
```

```
VALUE W200069W  
-7 = '-7 RF'  
-8 = '-8 DK'  
-1 = '-1 Inapplicable'  
-9 = '-9 Missing'  
1 = "1 ALL ITEMS HERE"  
2 = "2 ADDED ONE OR MORE ITEMS" ;
```

```
VALUE W200070W  
-7 = '-7 RF'  
-8 = '-8 DK'  
-1 = '-1 Inapplicable'  
-9 = '-9 Missing'  
1 = "1 MORE THAN $500"  
2 = "2 LESS THAN $500"  
3 = "3 JUST ABOUT $500" ;
```

```
VALUE W200071W  
-7 = '-7 RF'  
-8 = '-8 DK'  
-1 = '-1 Inapplicable'  
-9 = '-9 Missing'  
1 = "1 MORE THAN $1,000"  
2 = "2 LESS THAN $1,000"  
3 = "3 JUST ABOUT $1,000" ;
```

```
VALUE W200072W  
-7 = '-7 RF'  
-8 = '-8 DK'  
-1 = '-1 Inapplicable'  
-9 = '-9 Missing'  
1 = "1 MORE THAN $100"  
2 = "2 LESS THAN $100"  
3 = "3 JUST ABOUT $100" ;
```



## SAS ALGORITHM FOR DEMENTIA

```
VALUE W200073W
-7 = '-7 RF'
-8 = '-8 DK'
-1 = '-1 Inapplicable'
-9 = '-9 Missing'
1 = "1 YES"
2 = "2 NO"
7 = "7 YES, DOESNT KNOW HOW TO USE A COMPUTER" ;
```

```
VALUE W200074W
-7 = '-7 RF'
-8 = '-8 DK'
-1 = '-1 Inapplicable'
-9 = '-9 Missing'
1 = "1 MOST DAYS"
2 = "2 SOME DAYS"
3 = "3 RARELY" ;
```

```
VALUE W200076W
-7 = '-7 RF'
-8 = '-8 DK'
-1 = '-1 Inapplicable'
-9 = '-9 Missing'
1 = "1 YES"
2 = "2 NO"
7 = "7 DEAF" ;
```

```
VALUE W200077W
-7 = '-7 RF'
-8 = '-8 DK'
-1 = '-1 Inapplicable'
-9 = '-9 Missing'
1 = "1 YES"
2 = "2 NO"
7 = "7 BLIND" ;
```

```
VALUE W200078W
-7 = '-7 RF'
-8 = '-8 DK'
-1 = '-1 Inapplicable'
-9 = '-9 Missing'
1 = "1 EVERY DAY (7 DAYS A WEEK)"
2 = "2 MOST DAYS (5-6 DAYS A WEEK)"
3 = "3 SOME DAYS (2-4 DAYS A WEEK)"
4 = "4 RARELY (ONCE A WEEK OR LESS)"
5 = "5 NEVER" ;
```

```
VALUE W200080W
-7 = '-7 RF'
-8 = '-8 DK'
-1 = '-1 Inapplicable'
-9 = '-9 Missing'
1 = "1 YES, A CHANGE"
2 = "2 NO, NO CHANGE"
3 = "3 DEMENTIA/ALZHEIMER'S REPORTED BY PROXY" ;
```

```
VALUE W200081W
```

## SAS ALGORITHM FOR DEMENTIA

```
-7 = '-7 RF'  
-8 = '-8 DK'  
-1 = '-1 Inapplicable'  
-9 = '-9 Missing'  
1 = "1 SP HAS DEMENTIA/ALZHEIMER'S/ NOT ABLE"  
2 = "2 SP IS UNABLE TO SPEAK"  
3 = "3 SP IS UNABLE TO HEAR"  
4 = "4 SP REFUSED"  
5 = "5 PROXY REFUSED"  
6 = "6 SP NOT PRESENT"  
7 = "7 SP TOO ILL"  
8 = "8 SP LANGUAGE BARRIER"  
91 = "91 OTHER (SPECIFY)" ;
```

VALUE W200082W

```
-7 = '-7 RF'  
-8 = '-8 DK'  
-1 = '-1 Inapplicable'  
-9 = '-9 Missing'  
1 = "1 MUCH BETTER"  
2 = "2 BETTER"  
3 = "3 SAME"  
4 = "4 WORSE"  
5 = "5 MUCH WORSE" ;
```

VALUE W200083W

```
-7 = '-7 RF'  
-8 = '-8 DK'  
-1 = '-1 Inapplicable'  
-9 = '-9 Missing'  
1 = "1 YES"  
2 = "2 NO/DON'T KNOW" ;
```

VALUE W200084W

```
-7 = '-7 RF'  
-8 = '-8 DK'  
-1 = '-1 Inapplicable'  
-9 = '-9 Missing'  
1 = "1 CONTINUE WITH ACTIVITY"  
2 = "2 SP REFUSES ACTIVITY" ;
```

VALUE W200085W

```
-1 = '-1 Inapplicable'  
-9 = '-9 Missing'  
1 = "Word[1]"  
2 = "Word[2]"  
3 = "Word[3]"  
4 = "Word[4]"  
5 = "Word[5]"  
6 = "Word[6]"  
7 = "Word[7]"  
8 = "Word[8]"  
9 = "Word[9]"  
10 = "Word[10]"  
91 = "91 NO WORDS REMEMBERED"  
92 = "92 REFUSED" ;
```

## SAS ALGORITHM FOR DEMENTIA

```
VALUE W200086W
-7 = '-7 RF'
-8 = '-8 DK'
-1 = '-1 Inapplicable'
-9 = '-9 Missing'
1 = "1 DIFFICULTY HEARING ANY OF THE WORDS"
2 = "2 INTERRUPTION OCCURRED WHILE LIST WAS BEING READ"
91 = "91 OTHER PROBLEM (SPECIFY)"
92 = "92 NO PROBLEMS OCCURRED"
97 = "97 SP REFUSED WORD RECALL TASK" ;
```

```
VALUE W200087W
-1 = '-1 Inapplicable'
-9 = '-9 Missing'
1 = "1 SP ATTEMPTED CLOCK DRAWING"
2 = "2 SP DID NOT ATTEMPT CLOCK DRAWING"
97 = "3 SP REFUSED CLOCK DRAWING" ;
```

```
VALUE W200089W
-7 = '-7 RF'
-8 = '-8 DK'
-1 = '-1 Inapplicable'
-9 = '-9 Missing'
1 = "1 EVERY DAY (7 DAYS A WEEK)"
2 = "2 MOST DAYS (5-6 DAYS A WEEK)"
3 = "3 SOME DAYS (2-4 DAYS A WEEK)"
4 = "4 RARELY (ONCE A WEEK OR LESS)"
5 = "5 NEVER" ;
```

```
VALUE W200090W
-7 = '-7 RF'
-8 = '-8 DK'
-1 = '-1 Inapplicable'
-9 = '-9 Missing'
1 = "1 EVERY TIME"
2 = "2 MOST TIMES"
3 = "3 SOMETIMES"
4 = "4 RARELY"
5 = "5 NEVER" ;
```

```
VALUE W200092W
-7 = '-7 RF'
-8 = '-8 DK'
-1 = '-1 Inapplicable'
-9 = '-9 Missing'
1 = "1 MOST TIMES"
2 = "2 SOMETIMES"
3 = "3 RARELY"
4 = "4 NEVER" ;
```

```
VALUE W200093W
-7 = '-7 RF'
-8 = '-8 DK'
-1 = '-1 Inapplicable'
-9 = '-9 Missing'
1 = "1 NONE"
2 = "2 A LITTLE"
```

## SAS ALGORITHM FOR DEMENTIA

```
3 = "3 SOME"  
4 = "4 A LOT" ;  
  
VALUE W200094W  
-7 = '-7 RF'  
-8 = '-8 DK'  
-1 = '-1 Inapplicable'  
-9 = '-9 Missing'  
1 = "1 MORE OFTEN"  
2 = "2 LESS OFTEN"  
3 = "3 ABOUT THE SAME" ;  
  
VALUE W200095W  
-7 = '-7 RF'  
-8 = '-8 DK'  
-1 = '-1 Inapplicable'  
-9 = '-9 Missing'  
1 = "1 JANUARY"  
2 = "2 FEBRUARY"  
3 = "3 MARCH"  
4 = "4 APRIL"  
5 = "5 MAY"  
6 = "6 JUNE"  
7 = "7 JULY"  
8 = "8 AUGUST"  
9 = "9 SEPTEMBER"  
10 = "10 OCTOBER"  
11 = "11 NOVEMBER"  
12 = "12 DECEMBER"  
90 = "90 LAST INTERVIEW INFORMATION INCORRECT" ;  
  
VALUE W200096W  
-7 = '-7 RF'  
-8 = '-8 DK'  
-1 = '-1 Inapplicable'  
-9 = '-9 Missing'  
1 = "1 YES"  
2 = "2 NO"  
90 = "90 LAST INTERVIEW INFORMATION INCORRECT" ;  
  
VALUE W200097W  
-7 = '-7 RF'  
-8 = '-8 DK'  
-1 = '-1 Inapplicable'  
-9 = '-9 Missing'  
1 = "1 YES"  
2 = "2 NO / NO LONGER DRIVE" ;  
  
VALUE W200098W  
-7 = '-7 RF'  
-8 = '-8 DK'  
-1 = '-1 Inapplicable'  
-9 = '-9 Missing'  
1 = "1 YES"  
2 = "2 NO"  
7 = "7 NO, NO RAIN OR BAD WEATHER" ;
```

## SAS ALGORITHM FOR DEMENTIA

```
VALUE W200099W
-7 = '-7 RF'
-8 = '-8 DK'
-1 = '-1 Inapplicable'
-9 = '-9 Missing'
 1 = "1 ALWAYS DID IT BY SELF"
 2 = "2 ALWAYS DID IT TOGETHER WITH SOMEONE ELSE"
 3 = "3 SOMEONE ELSE ALWAYS DID IT"
 4 = "4 IT VARIED (MORE THAN ONE WAY)"
 5 = "5 NOT DONE IN LAST MONTH" ;
```

```
VALUE W200102W
-7 = '-7 RF'
-8 = '-8 DK'
-1 = '-1 Inapplicable'
-9 = '-9 Missing'
 1 = "1 MORE OFTEN"
 2 = "2 LESS OFTEN"
 3 = "3 SAME" ;
```

```
VALUE W200106W
-7 = '-7 RF'
-8 = '-8 DK'
-1 = '-1 Inapplicable'
-9 = '-9 Missing'
 1 = "1 YES"
 2 = "2 NO"
 7 = "7 ALWAYS FED THROUGH IV OR TUBE" ;
```

```
VALUE W200107W
-7 = '-7 RF'
-8 = '-8 DK'
-1 = '-1 Inapplicable'
-9 = '-9 Missing'
 1 = "1 EVERY TIME"
 2 = "2 MOST TIMES"
 3 = "3 SOMETIMES"
 4 = "4 RARELY" ;
```

```
VALUE W200109W
-7 = '-7 RF'
-8 = '-8 DK'
-1 = '-1 Inapplicable'
-9 = '-9 Missing'
 1 = "1 SHOWERING"
 2 = "2 TAKING BATHS"
 3 = "3 WASHING UP SOME OTHER WAY" ;
```

```
VALUE W200114W
-7 = '-7 RF'
-8 = '-8 DK'
-1 = '-1 Inapplicable'
-9 = '-9 Missing'
 1 = "1 VERY IMPORTANT"
 2 = "2 SOMEWHAT IMPORTANT"
 3 = "3 NOT SO IMPORTANT" ;
```

## SAS ALGORITHM FOR DEMENTIA

```
VALUE W200115W
-7 = '-7 RF'
-8 = '-8 DK'
-1 = '-1 Inapplicable'
-9 = '-9 Missing'
1 = "1 YES"
2 = "2 NO"
95 = "95 NO ACTIVITY LISTED" ;
```

```
VALUE W200116W
-7 = '-7 RF'
-8 = '-8 DK'
-1 = '-1 Inapplicable'
-9 = '-9 Missing'
1 = "1 LEFT"
2 = "2 RIGHT"
3 = "3 BOTH" ;
```

```
VALUE W200117W
-7 = '-7 RF'
-8 = '-8 DK'
-1 = '-1 Inapplicable'
-9 = '-9 Missing'
1 = "1 LEFT SIDE"
2 = "2 RIGHT SIDE"
3 = "3 BOTH SIDES" ;
```

```
VALUE W200118W
-7 = '-7 RF'
-8 = '-8 DK'
-1 = '-1 Inapplicable'
-9 = '-9 Missing'
1 = "1 ONE SIDE"
2 = "2 BOTH SIDES" ;
```

```
VALUE W200119W
-7 = '-7 RF'
-8 = '-8 DK'
-1 = '-1 Inapplicable'
-9 = '-9 Missing'
1 = "1 RECEIVE ALL TREATMENTS"
2 = "2 STOP/REJECT ALL TREATMENTS" ;
```

```
VALUE W200120W
-7 = '-7 RF'
-8 = '-8 DK'
-1 = '-1 Inapplicable'
-9 = '-9 Missing'
1 = "1 LIVING IN THEIR OWN HOME WITH HELP FROM FRIENDS AND FAMILY"
2 = "2 LIVING IN THEIR OWN HOME WITH HELP FROM SOMEONE PAID TO COME IN"
3 = "3 LIVING WITH AN ADULT CHILD"
4 = "4 LIVING IN AN ASSISTED LIVING FACILITY OR CONTINUING CARE
RESIDENCE"
5 = "5 LIVING IN A NURSING HOME" ;
```

```
VALUE W200121W
```

## SAS ALGORITHM FOR DEMENTIA

```
-7 = '-7 RF'  
-8 = '-8 DK'  
-1 = '-1 Inapplicable'  
-9 = '-9 Missing'  
1 = "1 YES"  
2 = "2 NO"  
3 = "3 DOESNT HAVE ANY MONEY TO PAY A CAREGIVER"  
4 = "4 WOULD NOT USE A PAID CAREGIVER" ;
```

VALUE W200122W

```
-7 = '-7 RF'  
-8 = '-8 DK'  
-1 = '-1 Inapplicable'  
-9 = '-9 Missing'  
1 = "1 MAKE DECISIONS WITHOUT MUCH ADVICE FROM THEM"  
2 = "2 GET THEIR ADVICE AND THEN MAKE DECISIONS"  
3 = "3 MAKE DECISIONS TOGETHER"  
4 = "4 LEAVE DECISIONS UP TO THEM" ;
```

VALUE W200123W

```
-7 = '-7 RF'  
-8 = '-8 DK'  
-1 = '-1 Inapplicable'  
-9 = '-9 Missing'  
1 = "1 HANDLE MOSTLY BY SELF"  
2 = "2 HANDLE TOGETHER WITH FAMILY OR CLOSE FRIENDS"  
3 = "3 FAMILY OR CLOSE FRIENDS MOSTLY HANDLE THESE THINGS"  
4 = "4 IT VARIES" ;
```

VALUE W200124W

```
-7 = '-7 RF'  
-8 = '-8 DK'  
-1 = '-1 Inapplicable'  
-9 = '-9 Missing'  
1 = "1 NEVER"  
2 = "2 RARELY"  
3 = "3 SOMETIMES"  
4 = "4 OFTEN" ;
```

VALUE W200126W

```
-7 = '-7 RF'  
-8 = '-8 DK'  
-1 = '-1 Inapplicable'  
-9 = '-9 Missing'  
1 = "1 AGREE A LOT"  
2 = "2 AGREE A LITTLE"  
3 = "3 DO NOT AGREE" ;
```

VALUE W200127W

```
-7 = '-7 RF'  
-8 = '-8 DK'  
-1 = '-1 Inapplicable'  
-9 = '-9 Missing'  
1 = "1 AGREE A LOT"  
2 = "2 AGREE A LITTLE"  
3 = "3 AGREE NOT AT ALL" ;
```

## SAS ALGORITHM FOR DEMENTIA

```
VALUE W200129W
-7 = '-7 RF'
-8 = '-8 DK'
-1 = '-1 Inapplicable'
-9 = '-9 Missing'
1 = "1 less than $1,000,"
2 = "2 $1,000 to less than $2,000,"
3 = "3 $2,000 to less than $3,000,"
4 = "4 $3,000 to less than $5,000, or"
5 = "5 $5,000 or more?" ;
```

```
VALUE W200131W
-7 = '-7 RF'
-8 = '-8 DK'
-1 = '-1 Inapplicable'
-9 = '-9 Missing'
1 = "1 YES"
2 = "2 NO"
3 = "3 RETIRED/DON'T WORK ANYMORE" ;
```

```
VALUE W200132W
-7 = '-7 RF'
-8 = '-8 DK'
-1 = '-1 Inapplicable'
-9 = '-9 Missing'
1 = "1 EVERY WEEK"
2 = "2 EVERY TWO WEEKS"
3 = "3 TWO TIMES A MONTH"
4 = "4 ONCE A MONTH"
5 = "5 DAILY"
91 = "91 OTHER SCHEDULE (SPECIFY)" ;
```

```
VALUE W200133W
-7 = '-7 RF'
-8 = '-8 DK'
-1 = '-1 Inapplicable'
-9 = '-9 Missing'
1 = "1 OWN"
2 = "2 RENT"
3 = "3 SOME OTHER ARRANGEMENT" ;
```

```
VALUE W200134W
-7 = '-7 RF'
-8 = '-8 DK'
-1 = '-1 Inapplicable'
-9 = '-9 Missing'
1 = "1 PAID OFF"
2 = "2 STILL MAKE PAYMENTS"
3 = "3 REVERSE MORTGAGE" ;
```

```
VALUE W200135W
-7 = '-7 RF'
-8 = '-8 DK'
-1 = '-1 Inapplicable'
-9 = '-9 Missing'
1 = "1 less than $250,"
2 = "2 $250-$499,"
```



## SAS ALGORITHM FOR DEMENTIA

```
    3 = "3 $500-$999, or"
    4 = "4 $1,000 or more?" ;
VALUE W500135W
-7 = '-7 RF'
-8 = '-8 DK'
-1 = '-1 Inapplicable'
-9 = '-9 Missing'
  1 = "1 less than $250"
  2 = "2 $250 to less than $500"
  3 = "3 $500 to less than $1,000"
  4 = "4 $1,000 to less than $3,000"
  5 = "5 $3,000 to less than $5,000"
  6 = "6 $5,000 or more?" ;
VALUE W200136W
-7 = '-7 RF'
-8 = '-8 DK'
-1 = '-1 Inapplicable'
-9 = '-9 Missing'
  1 = "1 5 YEARS"
  2 = "2 10 YEARS"
  3 = "3 LONGER THAN 10 YEARS" ;

VALUE W200137W
-7 = '-7 RF'
-8 = '-8 DK'
-1 = '-1 Inapplicable'
-9 = '-9 Missing'
  1 = "1 less than $50,000,"
  2 = "2 between $50,000 and $100,000, or"
  3 = "3 over $100,000?" ;

VALUE W200138W
-7 = '-7 RF'
-8 = '-8 DK'
-1 = '-1 Inapplicable'
-9 = '-9 Missing'
  1 = "1 less than $50,000,"
  2 = "2 $50,000-$74,999,"
  3 = "3 $75,000-$99,999,"
  4 = "4 $100,000-$199,999,"
  5 = "5 $200,000-$299,999,"
  6 = "6 $300,000-$499,999,"
  7 = "7 $500,000-$749,999, or"
  8 = "8 $750,000 or more?" ;

VALUE W200139W
-7 = '-7 RF'
-8 = '-8 DK'
-1 = '-1 Inapplicable'
-9 = '-9 Missing'
  1 = "1 PAY OFF BALANCE"
  2 = "2 PAY MINIMUM"
  3 = "3 PAY MORE THAN MINIMUM, BUT NOT ENTIRE BALANCE"
  4 = "4 DON'T HAVE ANY CREDIT CARDS" ;

VALUE W200140W
-7 = '-7 RF'
```

## SAS ALGORITHM FOR DEMENTIA

```
-8 = '-8 DK'  
-1 = '-1 Inapplicable'  
-9 = '-9 Missing'  
1 = "1 less than $1,000,"  
2 = "2 $1,000 - $1,999,"  
3 = "3 $2,000 - $3,999,"  
4 = "4 $4,000 - $5,999,"  
5 = "5 $6,000 - $9,999,"  
6 = "6 $10,000 - $19,999, or"  
7 = "7 $20,000 or more?" ;
```

VALUE W200141W

```
-7 = '-7 RF'  
-8 = '-8 DK'  
-1 = '-1 Inapplicable'  
-9 = '-9 Missing'  
1 = "1 MOST"  
2 = "2 SOME"  
3 = "3 A LITTLE" ;
```

VALUE W200142W

```
-7 = '-7 RF'  
-8 = '-8 DK'  
-1 = '-1 Inapplicable'  
-9 = '-9 Missing'  
1 = "1 less than $500,"  
2 = "2 $500 - $999,"  
3 = "3 $1,000 - $1,999,"  
4 = "4 $2,000 - $3,999,"  
5 = "5 $4,000 - $5,999,"  
6 = "6 $6,000 - $9,999,"  
7 = "7 $10,000 - $19,999, or"  
8 = "8 $20,000 or more?" ;
```

VALUE W200146W

```
-7 = '-7 RF'  
-8 = '-8 DK'  
-1 = '-1 Inapplicable'  
-9 = '-9 Missing'  
1 = "1 NEARLY EVERY DAY"  
2 = "2 MORE THAN HALF THE DAYS"  
3 = "3 SEVERAL DAYS (LESS THAN HALF)"  
4 = "4 A FEW DAYS" ;
```

VALUE W200147W

```
-7 = '-7 RF'  
-8 = '-8 DK'  
-1 = '-1 Inapplicable'  
-9 = '-9 Missing'  
1 = "1 INCLUDED"  
2 = "2 EXTRA CHARGE" ;
```

VALUE W200148W

```
-7 = '-7 RF'  
-8 = '-8 DK'  
-1 = '-1 Inapplicable'  
-9 = '-9 Missing'
```

## SAS ALGORITHM FOR DEMENTIA

```
1 = "1 Yes" ;

VALUE W800164W
-7 = '-7 RF'
-8 = '-8 DK'
-1 = '-1 Inapplicable'
-9 = '-9 Missing'
1 = "1 RECEIVE ALL TREATMENTS"
2 = "2 STOP/REJECT ALL TREATMENTS" ;

VALUE W800165W
-7 = '-7 RF'
-8 = '-8 DK'
-1 = '-1 Inapplicable'
-9 = '-9 Missing'
1 = "1 LIVING IN THEIR OWN HOME WITH HELP FROM FRIENDS AND FAMILY"
2 = "2 LIVING IN THEIR OWN HOME WITH HELP FROM SOMEONE PAID TO COME IN"
3 = "3 LIVING WITH AN ADULT CHILD"
4 = "4 LIVING IN AN ASSISTED LIVING FACILITY OR CONTINUING CARE
RESIDENCE"
5 = "5 LIVING IN A NURSING HOME" ;

VALUE W800166W
-7 = '-7 RF'
-8 = '-8 DK'
-1 = '-1 Inapplicable'
-9 = '-9 Missing'
1 = "1 YES"
2 = "2 NO"
3 = "3 DOESNT HAVE ANY MONEY TO PAY A CAREGIVER"
4 = "4 WOULD NOT USE A PAID CAREGIVER" ;

VALUE F200006W
-7 = '-7 RF'
-8 = '-8 DK'
-1 = '-1 Inapplicable'
-9 = '-9 Missing'
1 = "1 FREE STANDING NURSING HOME"
2 = "2 FREE STANDING ASSISTED LIVING FACILITY"
3 = "3 NURSING HOME AND ASSISTED LIVING FACILITY"
4 = "4 CONTINUING CARE RETIREMENT COMMUNITY (CCRC)"
5 = "5 ADULT FAMILY CARE HOME"
6 = "6 GROUP HOME"
7 = "7 BOARD AND CARE HOME"
8 = "8 RETIREMENT COMMUNITY OR SENIOR HOUSING (NOT CCRC)"
91 = "91 OTHER (SPECIFY)" ;

VALUE F200007W
-7 = '-7 RF'
-8 = '-8 DK'
-1 = '-1 Inapplicable'
-9 = '-9 Missing'
1 = "1 YES"
2 = "2 NO" ;

VALUE F200008W
-7 = '-7 RF'
```

## SAS ALGORITHM FOR DEMENTIA

```
-8 = '-8 DK'  
-1 = '-1 Inapplicable'  
-9 = '-9 Missing'  
1 = "1 INDEPENDENT LIVING"  
2 = "2 ASSISTED LIVING"  
3 = "3 SPECIAL CARE, MEMORY CARE, OR ALZHEIMER'S UNIT"  
4 = "4 NURSING HOME"  
91 = "91 OTHER (SPECIFY)" ;
```

VALUE F200009W

```
-7 = '-7 RF'  
-8 = '-8 DK'  
-1 = '-1 Inapplicable'  
-9 = '-9 Missing'  
1 = "1 ASSISTED LIVING"  
2 = "2 NURSING HOME" ;
```

VALUE F200011W

```
-7 = '-7 RF'  
-8 = '-8 DK'  
-1 = '-1 Inapplicable'  
-9 = '-9 Missing'  
1 = "1 YES, SERVICE PROVIDED AS PART OF PACKAGE"  
2 = "2 YES, SERVICE PROVIDED AT AN EXTRA CHARGE"  
3 = "3 NO, SERVICE NOT PROVIDED" ;
```

VALUE F200012W

```
-7 = '-7 RF'  
-8 = '-8 DK'  
-1 = '-1 Inapplicable'  
-9 = '-9 Missing'  
1 = "1 SP/FAMILY"  
2 = "2 SOCIAL SECURITY/SSI"  
3 = "3 MEDICAID"  
4 = "4 MEDICARE"  
5 = "5 OTHER SOURCE" ;
```

VALUE I200002W

```
-7 = '-7 RF'  
-8 = '-8 DK'  
-1 = '-1 Inapplicable'  
-9 = '-9 Missing'  
1 = "1 Yes"  
2 = "2 No" ;
```

VALUE I200003W

```
-7 = '-7 RF'  
-8 = '-8 DK'  
-1 = '-1 Inapplicable'  
-9 = '-9 Missing'  
1 = "1 English"  
2 = "2 Spanish"  
3 = "3 Other (specify)" ;
```

VALUE I200005W

```
-7 = '-7 RF'  
-8 = '-8 DK'
```

## SAS ALGORITHM FOR DEMENTIA

```
-1 = '-1 Inapplicable'  
-9 = '-9 Missing'  
1 = "1 Friendly and interested"  
2 = "2 Cooperative but not particularly interested"  
3 = "3 Impatient and restless"  
4 = "4 Hostile" ;
```

VALUE I200006W

```
-7 = '-7 RF'  
-8 = '-8 DK'  
-1 = '-1 Inapplicable'  
-9 = '-9 Missing'  
1 = "1 Good"  
2 = "2 Fair"  
3 = "3 Poor" ;
```

VALUE I200008W

```
-7 = '-7 RF'  
-8 = '-8 DK'  
-1 = '-1 Inapplicable'  
-9 = '-9 Missing'  
1 = "1 All of the time"  
2 = "2 Most of the time"  
3 = "3 Some of the time"  
4 = "4 Only for the cognition and/or performance parts"  
5 = "5 None of the time" ;
```

VALUE I200010W

```
-7 = '-7 RF'  
-8 = '-8 DK'  
-1 = '-1 Inapplicable'  
-9 = '-9 Missing'  
1 = "1 Yes"  
2 = "2 No"  
3 = "3 Interview was conducted by telephone" ;
```

VALUE I200012W

```
-7 = '-7 RF'  
-8 = '-8 DK'  
-1 = '-1 Inapplicable'  
-9 = '-9 Missing'  
1 = "1 Yes"  
2 = "2 No"  
3 = "3 Not Administered" ;
```

VALUE I200013W

```
-7 = '-7 RF'  
-8 = '-8 DK'  
-1 = '-1 Inapplicable'  
-9 = '-9 Missing'  
1 = "1 Yes"  
2 = "2 No" ;
```

VALUE I200016W

```
-7 = '-7 RF'  
-8 = '-8 DK'  
-1 = '-1 Inapplicable'
```

## SAS ALGORITHM FOR DEMENTIA

```
-9 = '-9 Missing'  
1 = "1 Yes"  
2 = "2 No"  
3 = "3 Entire interview conducted by telephone" ;
```

```
VALUE I200017W  
-7 = '-7 RF'  
-8 = '-8 DK'  
-1 = '-1 Inapplicable'  
-9 = '-9 Missing'  
1 = "1 Not at all cluttered"  
2 = "2 Somewhat cluttered"  
3 = "3 Very cluttered"  
4 = "4 Could not see other rooms" ;
```

```
VALUE I200018W  
-7 = '-7 RF'  
-8 = '-8 DK'  
-1 = '-1 Inapplicable'  
-9 = '-9 Missing'  
1 = "1 None"  
2 = "2 A little"  
3 = "3 Some"  
4 = "4 A lot"  
5 = "5 Could not observe" ;
```

```
VALUE I200019W  
-7 = '-7 RF'  
-8 = '-8 DK'  
-1 = '-1 Inapplicable'  
-9 = '-9 Missing'  
1 = "1 Yes"  
2 = "2 No"  
7 = "7 Could not observe" ;
```

```
/* DERIVED VARIABLE FORMATS */
```

```
VALUE LVGARRG  
1 = '1 Alone'  
2 = '2 With spouse/partner only (spouse/partner in household)'  
3 = '3 With spouse/partner and with others'  
4 = '4 With others only'  
-1 = '-1 Inapplicable'  
-9 = '-9 Missing';
```

```
VALUE DOUTSFDF  
8 = '8 Not done in last month'  
1 = '1 Did not do by self in last month'  
2 = '2 Did by self in last month/No Difficulty'  
3 = '3 Did by self in last month/Difficulty'  
4 = '4 DKRF Did by self in last month/No Difficulty'  
5 = '5 DKRF Did by self in last month/Difficulty'  
6 = '6 Did by self in last month/DKRF Difficulty'  
7 = '7 DKRF Did by self in last month/DKRF Difficulty'  
-1 = '-1 Inapplicable'  
-9 = '-9 Missing';
```

## SAS ALGORITHM FOR DEMENTIA

```
VALUE DOUTDEVI
  8 = '8 Not done in last month'
  1 = '1 No use of devices to go outside in last month'
  2 = '2 Use of devices to go outside in last month'
  3 = '3 DKRF If used devices to go outside in last month'
  4 = '4 DKRF If used devices in last month'
 -1 = '-1 Inapplicable'
 -9 = '-9 Missing';

VALUE DOUTHELP
  8 = '8 Not done in last month'
  1 = '1 No help to go outside in last month'
  2 = '2 Had help to go outside in last month'
  3 = '3 DKRF If had help to go outside in last month'
 -1 = '-1 Inapplicable'
 -9 = '-9 Missing';

VALUE DINSDFSFD
  8 = '8 Not done in last month'
  1 = '1 Did not do by self in last month'
  2 = '2 Did by self in last month/No Difficulty'
  3 = '3 Did by self in last month/Difficulty'
  4 = '4 DKRF Did by self in last month/No Difficulty'
  5 = '5 DKRF Did by self in last month/Difficulty'
  6 = '6 Did by self in last month/DKRF Difficulty'
  7 = '7 DKRF Did by self in last month/DKRF Difficulty'
 -1 = '-1 Inapplicable'
 -9 = '-9 Missing';

VALUE DINSDDDEV
  8 = '8 Not done in last month'
  1 = '1 No use of devices inside in last month'
  2 = '2 Use of devices inside in last month'
  3 = '3 DKRF If used devices inside in last month'
  4 = '4 DKRF On use of devices'
 -1 = '-1 Inapplicable'
 -9 = '-9 Missing';

VALUE dinsdhlp
  8 = '8 Not done in last month'
  1 = '1 No help to go around inside in last month'
  2 = '2 Had help to go around inside in last month'
  3 = '3 DKRF If had help to go around inside in last month'
 -1 = '-1 Inapplicable'
 -9 = '-9 Missing';

VALUE dbedsdfd
  1 = '1 Did not do by self in last month'
  2 = '2 Did by self in last month/No Difficulty'
  3 = '3 Did by self in last month/Difficulty'
  4 = '4 DKRF Did by self in last month/No Difficulty'
  5 = '5 DKRF Did by self in last month/Difficulty'
  6 = '6 Did by self in last month/DKRF Difficulty'
  7 = '7 DKRF Did by self in last month/DKRF Difficulty'
 -1 = '-1 Inapplicable'
 -9 = '-9 Missing';
```

## SAS ALGORITHM FOR DEMENTIA

```
VALUE dbeddevi
  1 = '1 No use of cane or walker to get out of bed in last month'
  2 = '2 Use of cane or walker to get out of bed in last month'
  3 = '3 DKRF If Used cane or walker to get out of bed in last month'
  4 = '4 DKRF If used cane or walker in last month'
  -1 = '-1 Inapplicable'
  -9 = '-9 Missing';
```

```
VALUE dbedhelp
  1 = '1 No help to get out of bed in last month'
  2 = '2 Had help to get out of bed in last month'
  3 = '3 DKRF If had help to get out of bed in last month'
  -1 = '-1 Inapplicable'
  -9 = '-9 Missing';
```

```
VALUE dlaunbfd
  1 = '1 Did not do by self in last month'
  2 = '2 Did by self in last month/No Difficulty'
  3 = '3 Did by self in last month/Difficulty'
  4 = '4 DKRF Did by self in last month/No Difficulty'
  5 = '5 DKRF Did by self in last month/Difficulty'
  6 = '6 Did by self in last month/DKRF Difficulty'
  7 = '7 DKRF Did by self in last month/DKRF Difficulty'
  8 = '8 Not done in last month'
  -1 = '-1 Inapplicable'
  -9 = '-9 Missing';
```

```
VALUE dlaunrea
  1= '1 Health/functioning reason only'
  2= '2 Other reason only'
  3= '3 Both health/functioning and other'
  4= '4 Service/someone from the place SP lives'
  -7 = '-7 RF'
  -8 = '-8 DK'
  -1 = '-1 Inapplicable'
  -9 = '-9 Missing';
```

```
VALUE dshopsfd
  1 = '1 Did not do by self in last month'
  2 = '2 Did by self in last month/No Difficulty'
  3 = '3 Did by self in last month/Difficulty'
  4 = '4 DKRF Did by self in last month/No Difficulty'
  5 = '5 DKRF Did by self in last month/Difficulty'
  6 = '6 Did by self in last month/DKRF Difficulty'
  7 = '7 DKRF Did by self in last month/DKRF Difficulty'
  8 = '8 Not done in last month'
  -1 = '-1 Inapplicable'
  -9 = '-9 Missing';
```

```
VALUE dshoprea
  1= '1 Health/functioning reason only'
  2= '2 Other reason only'
  3= '3 Both health/functioning and other'
  4= '4 Service/someone from the place SP lives'
```



## SAS ALGORITHM FOR DEMENTIA

```
-7 = '-7 RF'  
-8 = '-8 DK'  
-1 = '-1 Inapplicable'  
-9 = '-9 Missing';
```

### VALUE dmealsfd

```
1 = '1 Did not do by self in last month'  
2 = '2 Did by self in last month/No Difficulty'  
3 = '3 Did by self in last month/Difficulty'  
4 = '4 DKRF Did by self in last month/No Difficulty'  
5 = '5 DKRF Did by self in last month/Difficulty'  
6 = '6 Did by self in last month/DKRF Difficulty'  
7 = '7 DKRF Did by self in last month/DKRF Difficulty'  
8 = '8 Not done in last month'  
-1 = '-1 Inapplicable'  
-9 = '-9 Missing';
```

### VALUE dmealrea

```
1= '1 Health/functioning reason only'  
2= '2 Other reason only'  
3= '3 Both health/functioning and other'  
4= '4 Service/someone from the place SP lives'  
-7 = '-7 RF'  
-8 = '-8 DK'  
-1 = '-1 Inapplicable'  
-9 = '-9 Missing';
```

### VALUE dbanksfd

```
1 = '1 Did not do by self in last month'  
2 = '2 Did by self in last month/No Difficulty'  
3 = '3 Did by self in last month/Difficulty'  
4 = '4 DKRF Did by self in last month/No Difficulty'  
5 = '5 DKRF Did by self in last month/Difficulty'  
6 = '6 Did by self in last month/DKRF Difficulty'  
7 = '7 DKRF Did by self in last month/DKRF Difficulty'  
8 = '8 Not done in last month'  
-7 = '-7 RF'  
-8 = '-8 DK'  
-1 = '-1 Inapplicable'  
-9 = '-9 Missing';
```

### VALUE dbankrea

```
1= '1 Health/functioning reason only'  
2= '2 Other reason only'  
3= '3 Both health/functioning and other'  
4= '4 Service/someone from the place SP lives'  
-7 = '-7 RF'  
-8 = '-8 DK'  
-1 = '-1 Inapplicable'  
-9 = '-9 Missing';
```

### VALUE deatdevi

```
1 = '1 No use of adapted utensils in last month'  
2 = '2 Use of adapted utensils in last month'  
8 = '8 Not done in last month'  
3 = '3 DKRF If used adapted utensils in last month'  
-1 = '-1 Inapplicable'
```

## SAS ALGORITHM FOR DEMENTIA

```
-9 = '-9 Missing';
```

### VALUE deathelp

```
1 = '1 No help eating in last month'  
2 = '2 Had help eating in last month'  
3 = '3 DKRF If had help eating in last month'  
8 = '8 Not done in last month'  
-1 = '-1 Inapplicable'  
-9 = '-9 Missing';
```

### VALUE deatsfdf

```
1 = '1 Did not do by self in last month'  
2 = '2 No Difficulty by self (and when using utensils)'  
3 = '3 Difficulty by self (and when using utensils)'  
6 = '6 Did by self in last month/DKRF Difficulty'  
7 = '7 DKRF Did by self in last month/DKRF Difficulty'  
8 = '8 Not done in last month'  
-1 = '-1 Inapplicable'  
-9 = '-9 Missing';
```

### VALUE dbathdev

```
1 = '1 No use of grab bars or bath seats in last month'  
2 = '2 Use of grab bars or bath seats in last month'  
3 = '3 DKRF If use of grab bars or bath seats in last month'  
4 = '4 DKRF If had grab bars or bath seats in last month'  
9 = '9 No bars/seats/shower/tub or washes up other way'  
-1 = '-1 Inapplicable'  
-9 = '-9 Missing';
```

### VALUE dbathhel

```
1 = '1 No help bathing in last month'  
2 = '2 Had help bathing in last month'  
3 = '3 DKRF If had help bathing in last month'  
-1 = '-1 Inapplicable'  
-9 = '-9 Missing';
```

### VALUE dbathsfd

```
1 = '1 Did not do by self in last month'  
2 = '2 No Difficulty by self (and when using grab bars or tub seat)'  
3 = '3 Difficulty by self (and when using grab bars or tub seat)'  
6 = '6 Did by self in last month/DKRF Difficulty'  
7 = '7 DKRF Did by self in last month/DKRF Difficulty'  
-1 = '-1 Inapplicable'  
-9 = '-9 Missing';
```

### VALUE dtoildev

```
1 = '1 No use of toileting devices in last month'  
2 = '2 Use of toileting devices in last month'  
3 = '3 DKRF of some and no use of other toileting devices in last month'  
-1 = '-1 Inapplicable'  
-9 = '-9 Missing';
```

### VALUE dtoilhel

```
1 = '1 No help toileting in last month'  
2 = '2 Had help toileting in last month'  
3 = '3 DKRF If had help toileting in last month'  
-1 = '-1 Inapplicable'
```

## SAS ALGORITHM FOR DEMENTIA

```
-9 = '-9 Missing';
```

### VALUE dtoolsfd

```
1 = '1 Did not do by self in last month'  
2 = '2 No Difficulty by self (and when using toileting devices)'  
3 = '3 Difficulty by self (and when using toileting devices)'  
6 = '6 Did by self in last month/DKRF Difficulty'  
7 = '7 DKRF Did by self in last month/DKRF Difficulty'  
-1 = '-1 Inapplicable'  
-9 = '-9 Missing';
```

### VALUE ddresdev

```
8 = '8 Not done in last month'  
9 = '9 DKRF If dressed in last month'  
2 = '2 Use of dressing devices in last month'  
1 = '1 No use of dressing devices in last month'  
3 = '3 DKRF If use of dressing devices in last month'  
-1 = '-1 Inapplicable'  
-9 = '-9 Missing';
```

### VALUE ddreshel

```
8 = '8 Not done in last month'  
9 = '9 DKRF If dressed in last month'  
1 = '1 No help dressing in last month'  
2 = '2 Had help dressing in last month'  
3 = '3 DKRF If had help dressing in last month'  
-1 = '-1 Inapplicable'  
-9 = '-9 Missing';
```

### VALUE ddressfd

```
1 = '1 Did not do by self in last month'  
2 = '2 No Difficulty by self (and when using dressing devices)'  
3 = '3 Difficulty by self (and when using dressing devices)'  
6 = '6 Did by self in last month/DKRF Difficulty'  
7 = '7 DKRF Did by self in last month/DKRF Difficulty'  
8 = '8 Not done in last month'  
-1 = '-1 Inapplicable'  
-9 = '-9 Missing';
```

### VALUE dmedssfd

```
1 = '1 Did not do by self in last month'  
2 = '2 Did by self in last month/No Difficulty'  
3 = '3 Did by self in last month/Difficulty'  
4 = '4 DKRF Did by self in last month/No Difficulty'  
5 = '5 DKRF Did by self in last month/Difficulty'  
6 = '6 Did by self in last month/DKRF Difficulty'  
7 = '7 DKRF Did by self in last month/DKRF Difficulty'  
8 = '8 Not done in last month'  
9 = '9 No or DKRF if medications taken in last month'  
-1 = '-1 Inapplicable'  
-9 = '-9 Missing';
```

### VALUE dmedsrea

```
1 = '1 Health/functioning reason only'  
2 = '2 Other reason only'  
3 = '3 Both health/functioning and other'  
4 = '4 Service/someone from the place SP lives'  
-7 = '-7 RF'
```

## SAS ALGORITHM FOR DEMENTIA

```
-8 = '-8 DK'
-1 = '-1 Inapplicable'
-9 = '-9 Missing';

VALUE dmarstat
  1 = '1 Married'
  2 = '2 Living with a partner'
  3 = '3 Separated'
  4 = '4 Divorced'
  5 = '5 Widowed'
  6 = '6 Never married'
  -7 = '-7 RF'
  -8 = '-8 DK'
  -1 = '-1 Inapplicable'
  -9 = '-9 Missing';
VALUE DSPSAGEC
  -7 = '-7 RF'
  -8 = '-8 DK'
  -1 = '-1 Inapplicable'
  -9 = '-9 Missing'
  1 = " 1 UNDER 50"
  2 = " 2 50-54"
  3 = " 3 55-59"
  4 = " 4 60-64"
  5 = " 5 65-69"
  6 = " 6 70-74"
  7 = " 7 75-79"
  8 = " 8 80-84"
  9 = " 9 85-89"
  10 = "10 90 +" ;

VALUE dresid
  -1 = '-1 Inapplicable'
  1 = '1 Community '
  2 = '2 Residential Care Resident not nursing home (SP interview
complete)'
  3 = '3 Residential Care Resident not nursing home (FQ only)'
  4 = '4 Nursing Home Resident';
VALUE f_dresid
  -1 = '-1 Inapplicable'
  1 = '1 Community '
  2 = '2 Residential care not nursing home (SP interview)'
  3 = '3 Residential care not nursing home (FQ only)'
  4 = '4 Nursing home (SP interview)'
  5 = '5 Nursing home (FQ only)'
  6 = '6 Deceased'
  7 = '7 Residential care not nursing home in R1 and R5 (FQ only)'
  8 = '8 Nursing home in R1 and R5 (FQ only)' ;
VALUE f2dresid
  -1='-1 Inapplicable'
  1 = '1 Community '
  2 = '2 Residential care not nursing home (SP interview)'
  3 = '3 Residential care not nursing home (FQ only)'
  4 = '4 Nursing home (SP interview)'
  5 = '5 Nursing home (FQ only)'
  6 = '6 Deceased'
  7 = '7 Residential care not nursing home in R1 and R2 (FQ only)'
```

## SAS ALGORITHM FOR DEMENTIA

```
      8 = '8 Nursing home in R1 and R2 (FQ only)' ;
VALUE f3dresid
      -1='-1 Inapplicable'
      1 = '1 Community '
      2 = '2 Residential care not nursing home (SP interview)'
      3 = '3 Residential care not nursing home (FQ only)'
      4 = '4 Nursing home (SP interview)'
      5 = '5 Nursing home (FQ only)'
      6 = '6 Deceased'
      7 = '7 Residential care not nursing home in R1 and R3 (FQ only)'
      8 = '8 Nursing home in R1 and R3 (FQ only)' ;
VALUE f4dresid
      -1='-1 Inapplicable'
      1 = '1 Community '
      2 = '2 Residential care not nursing home (SP interview)'
      3 = '3 Residential care not nursing home (FQ only)'
      4 = '4 Nursing home (SP interview)'
      5 = '5 Nursing home (FQ only)'
      6 = '6 Deceased'
      7 = '7 Residential care not nursing home in R1 and R4 (FQ only)'
      8 = '8 Nursing home in R1 and R4 (FQ only)' ;
```

```
VALUE QUARTILE
-9="-9 Missing"
-1="-1 Inapplicable";
```

```
VALUE SPPB
-9="-9 Missing"
-1="-1 Inapplicable";
```

```
VALUE DCLCKSC
  0 = "0 Not recognizable as a clock"
  1 = "1 Severely distorted depiction of a clock"
  2 = "2 Moderately distorted depiction of a clock"
  3 = "3 Mildly distorted depiction of a clock"
  4 = "4 Reasonably accurate depiction of a clock"
  5 = "5 Accurate depiction of a clock (circular or square)"
-7 = "-7 SP refused to draw clock"
-8 = "-8 DK"
-1 = "-1 Inapplicable"
-2 = "-2 Proxy says cannot ask SP"
-3 = "-3 Proxy says can ask SP but SP unable to answer"
-4 = "-4 SP did not attempt to draw clock"
-9 = "-9 Missing";
```

```
VALUE DCLCKCL
  1 = '1 Very clear'
  2 = '2 Somewhat clear'
  3 = '3 Somewhat unclear'
  4 = '4 Very unclear'
  5 = '5 Blank'
-7 = '-7 SP refused to draw clock'
-8 = '-8 DK'
-1 = '-1 Inapplicable'
-2 = '-2 Proxy says cannot ask SP'
-3 = '-3 Proxy says can ask SP but SP unable to answer'
```

## SAS ALGORITHM FOR DEMENTIA

```
-4 = '-4 SP did not attempt to draw clock'  
-9 = '-9 Missing';
```

### VALUE RESULT

```
-9='-9: MISSING'  
1='1: COMPLETED W RESULTS'  
2='2: COMPLETED MISSING RESULTS'  
3='3: ATTEMPTED W RESULTS'  
4='4: ATTEMPTED MISSING RESULTS'  
5='5: NOT ATTEMPTED SAFETY'  
6='6: NOT ATTEMPTED NOT SAFETY REASON'  
7='7: NO CHAIR/NO SPACE'  
9='9: NOT ATTEMPTED/MISSING';
```

### VALUE RESULT\_SCH

```
-9='-9: MISSING'  
1='1: COMPLETED W/OUT ARMS '  
2='2: COMPLETED W ARMS '  
3='3: ATTEMPTED W RESULTS '  
4='4: ATTEMPTED MISSING RESULTS '  
5='5: NOT ATTEMPTED SAFETY '  
6='6: NOT ATTEMPTED NOT SAFETY REASON '  
7='7: NO CHAIR/SAFETY REASON '  
8='8: NO CHAIR/NOT SAFETY REAS '  
9='9: NOT ATTEMPTED/MISSING '  
10='10: CH4=1 SINGLE CHAIR NOT COMPL';
```

### VALUE RESULT\_RCH

```
-9='-9: MISSING'  
1='1: COMPLETED W/OUT ARMS '  
2='2: COMPLETED MISSING RESULTS '  
3='3: ATTEMPTED W RESULTS '  
4='4: ATTEMPTED MISSING RESULTS '  
5='5: NOT ATTEMPTED SAFETY '  
6='6: NOT ATTEMPTED NOT SAFETY REASON '  
9='9: NO CHAIR OR NOT ATTEMPTED/MISSING';
```

### VALUE ZEROSCORE

```
1="1: NOT ELIGIBLE DUE TO EXCLUSION CRITERIA"  
2="2: NOT ATTEMPTED FOR SAFETY REASON"  
3="3: ATTEMPTED CHAIR STANDS/NOT ATTEMPTED FOR SAFETY"  
4="4: ATTEMPTED"  
5="5: NEW WALKING EXCLUSION"  
9="9: NOT ASSIGNED A ZERO SCORE";
```

### VALUE D\_LMLLOC

```
1 = '1 Community'  
2 = '2 Residential Care'  
-1 = '-1 Inapplicable'  
-9 = '-9 Missing';
```

### VALUE D\_LOCSP

```
-7 = '-7 RF'  
-8 = '-8 DK'  
-1 = '-1 Inapplicable'  
-9 = '-9 Missing'  
1 = "1 Independent Living/Housing/Retirement"
```

## SAS ALGORITHM FOR DEMENTIA

```
2 = "2 Assisted Living/Personal Care"
3 = "3 Special Care, Memory or Alzheimer's Unit"
4 = "4 Nursing Home"
8 = "8 Not Reported" ;

VALUE PA25FMT
-1 = '-1 Inapplicable'
-8 = '-8 DK'
-9 = '-9 Missing'
111= '111 Sleeping Napping'
131= '131 Eating'
132= '132 Going out to eat'
199= '199 Other self care activities'
211= '211 Work and work-related activities'
221= '221 Other income generating activities'
241= '241 Volunteering'
299= '299 Other productive activities'
321= '321 Shopping for non-durable goods'
399= '399 Other shopping'
411= '411 Food and drink preparation'
434= '434 Outdoor Maintenance'
439= '439 Household chores (cannot tell if indoor/outdoor)'
441= '441 Animal and pet care'
442= '442 Walking and exercising pets'
449= '449 Other animal and pet care'
451= '451 Vehicle maintenance and repair'
471= '471 Financial management'
499= '499 Other household activities'
511= '511 Physical care and assistance to others'
599= '599 Other physical care'
611= '611 Socializing with others in person'
612= '612 Socializing with others on the phone'
616= '616 Socializing and communicating on the computer'
621= '621 Watching TV and movies'
631= '631 Doing puzzles or games not on computer or online'
632= '632 Gambling not online or at a casino'
636= '636 Doing puzzles or games on a computer or online'
641= '641 Arts and crafts or hobbies'
642= '642 Reading'
643= '643 Writing'
644= '644 Listening to music'
646= '646 Computer or online leisure activities'
651= '651 Smoking or other tobacco use'
652= '652 Drinking alcohol'
661= '661 Doing nothing/relaxing'
669= '669 No activity'
699= '699 Other non active leisure'
711= '711 Playing sports'
712= '712 Walking or jogging'
713= '713 Other outdoor recreating activities'
714= '714 Attending sporting events'
715= '715 Other physical activity, exercise, yoga, swimming, working out,
dancing'
718= '718 Watching sporting events'
721= '721 Attending arts including plays and concerts'
723= '723 Attending movies'
724= '724 Attending casinos'
```

## SAS ALGORITHM FOR DEMENTIA

```
737= '737 Travel for leisure'  
799= '799 Other active leisure'  
811= '811 Attending religious activities'  
812= '812 Other religious and spiritual activities'  
821= '821 Attending meetings or events'  
899= '899 Other organizational activity'  
991= '991 Other miscellaneous'  
992= '992 No favorite activity'  
997= '997 Refused'  
998= '998 Dont Know'  
999= '999 Not Codeable';  
  
      VALUE OCC_CODE  
1  = '1 Management Occupations: 0010-0430'  
2  = '2 Business and Financial Operations Occupations: 0500-0950'  
3  = '3 Computer and mathematical occupations: 1000-1240'  
4  = '4 Architecture and Engineering Occupations: 1300-1560'  
5  = '5 Life, Physical, and Social Science Occupations: 1600-1965'  
6  = '6 Community and Social Service Occupations: 2000-2060'  
7  = '7 Legal Occupations: 2100-2160'  
8  = '8 Education, Training, and Library Occupations: 2200-2550'  
9  = '9 Arts, Design, Entertainment, Sports, and Media Occupations: 2600-  
2960'  
10 = '10 Healthcare Practitioners and Technical Occupations: 3000-3540'  
11 = '11 Healthcare Support Occupations: 3600-3655'  
12 = '12 Protective Service Occupations: 3700-3955'  
13 = '13 Food Preparation and Serving Related Occupations: 4000-4160'  
14 = '14 Building and Grounds Cleaning and Maintenance Occupations: 4200-  
4250'  
15 = '15 Personal Care and Service Occupations: 4300-4650'  
16 = '16 Sales and Related Occupations: 4700-4965'  
17 = '17 Office and Administrative Support Occupations: 5000-5940'  
18 = '18 Farming, Fishing, and Forestry Occupations: 6000-6130'  
19 = '19 Construction and Extraction Occupations: 6200-6940'  
20 = '20 Installation, Maintenance, and Repair Occupations: 7000-7630'  
21 = '21 Production Occupations: 7700-8965'  
22 = '22 Transportation and Material Moving Occupations: 9000-9750'  
23 = '23 Military Specific Occupations: 9800-9830'  
24 = '24 No current occ (Unemployed, no work in the last 5 years, never  
worked): 9920'  
25 = '25 Blank field'  
26 = '26 Code did not match'  
94 = '94 Uncodable'  
95 = '95 Never Worked Entire Life'  
96 = '96 Homemaker/Raised Children'  
-7 = '-7 RF'  
-8 = '-8 DK'  
-1 = '-1 Inapplicable'  
-9 = '-9 Missing';  
  
      Value fl_Dfac  
1 = '1 Should have routed as facility but did not'  
2 = '2 Routed as facility but determined not facility resident'  
-1 = '-1 Inapplicable';  
VALUE PE_RSLT  
-9 = '-9 Missing'  
-1 = '-1 Inapplicable'
```



## SAS ALGORITHM FOR DEMENTIA

```
1='1 Completed'
2='2 Attempted'
3='3 Not attempted' ;
VALUE dosfacd /* FOR FQ2dosfacd */
  -9= "-9 Missing"
  -8 = "-8 DK"
  -1 = "-1 INAPPLICABLE"
  1 = " 1 FREE STANDING NURSING HOME"
  2 = " 2 FREE STANDING ASSISTED LIVING FACILITY / RESIDENTIAL CARE
FACILITY"
  3 = " 3 NURSING HOME AND ASSISTED LIVING FACILITY"
  4 = " 4 CONTINUING CARE RETIREMENT COMMUNITY (CCRC) "
  5 = " 5 ADULT FAMILY CARE HOME"
  6 = " 6 GROUP HOME"
  7 = " 7 BOARD AND CARE HOME / PERSONAL CARE HOME"
  8 = " 8 RETIREMENT COMMUNITY OR SENIOR HOUSING (NOT CCRC) "
  9 = " 9 INDEPENDENT LIVING"
 10 = " 10 ASSISTED AND INDEPENDENT/RETIREMENT (NO NURSING HOME) "
 11 = " 11 HOUSING (APT, CONDO, ETC.)";
;
VALUE dosfaca /* FOR FQ2dosfaca */
  -9= "-9 Missing"
  -8 = "-8 DK"
  -1 = "-1 INAPPLICABLE"
  1 = " 1 INDEPENDENT LIVING / HOUSING / RETIREMENT "
  2 = " 2 ASSISTED LIVING / PERSONAL CARE"
  3 = " 3 SPECIAL CARE, MEMORY CARE, OR ALZHEIMER'S UNIT"
  4 = " 4 NURSING HOME" ;

VALUE INAP_YN
  1 = ' 1 Yes'
  2 = ' 2 No'
  -1 = '-1 Inapplicable' ;
VALUE CENDIV /* RE1DCENSDIV - Updated for R2 - Re-Release */
  1 = '1 Northeast Region: New England Division (ME, NH, VT, MA, RI, CT) '
  2 = '2 Northeast Region: Middle Atlantic Division (NY, NJ, PA) '
  3 = '3 Midwest Region: East North Central Division (OH, IN, IL, MI, WI) '
  4 = '4 Midwest Region: West North Central Division (MN, IA, MO, ND, SD,
NE, KS) '
  5 = '5 South Region: South Atlantic Division (DE, MD, DC, VA, WV, NC,
SC, GA, FL) '
  6 = '6 South Region: East South Central Division (KY, TN, AL, MS) '
  7 = '7 South Region: West South Central Division (AR, LA, OK, TX) '
  8 = '8 West Region: Mountain Division (MT, ID, WY, CO, NM, AZ, UT, NV) '
  9 = '9 West Region: Pacific Division (WA, OR, CA, AK, HI) '
  -9 = '-9 Missing';

VALUE W000002W
  -7 = '-7 RF'
  -8 = '-8 DK'
  -1 = '-1 Inapplicable'
  -9 = '-9 Missing'
  1 = "1 MALE"
  2 = "2 FEMALE" ;

VALUE W000005W
  1 = ' 1 Yes'
```

## SAS ALGORITHM FOR DEMENTIA

```
2 = ' 2 No'  
-7 = '-7 RF'  
-8 = '-8 DK'  
-1 = '-1 Inapplicable'  
-9 = '-9 Missing';
```

```
VALUE R1DRESID  
-1 = '-1 Inapplicable'  
1 = '1 Community '  
2 = '2 Residential Care Resident not nursing home (SP interview  
complete)'  
3 = '3 Residential Care Resident not nursing home (FQ only)'  
4 = '4 Nursing Home Resident';
```

```
VALUE W200016W  
-7 = '-7 RF'  
-8 = '-8 DK'  
-1 = '-1 Inapplicable'  
-9 = '-9 Missing'  
1 = "1 MEDICAID"  
2 = "2 MEDICARE"  
3 = "3 STATE PROGRAM"  
91 = "91 OTHER (SPECIFY)" ;
```

```
VALUE W200012W  
-7 = '-7 RF'  
-8 = '-8 DK'  
-1 = '-1 Inapplicable'  
-9 = '-9 Missing'  
1 = "1 REGULAR"  
2 = "2 VARIED" ;
```

```
VALUE W200061W  
-7 = '-7 RF'  
-8 = '-8 DK'  
-1 = '-1 Inapplicable'  
-9 = '-9 Missing'  
1 = "1 SEPARATION OR DIVORCE"  
2 = "2 DECEASED"  
3 = "3 MOVED ELSEWHERE"  
5 = "5 LAST INTERVIEW INFORMATION INCORRECT"  
8 = "8 OTHER REASON" ;
```

```
VALUE d2hrsmth  
-13= '-13 Deceased '  
-12= '-12 Zero days/wk'  
-11= '-11 Hours missing'  
-10= '-10 Days missing'  
-9 = ' -9 Days and hrs missing'  
-1 = ' -1 Inapplicable'  
-7 = ' -7 RF'  
-8 = ' -8 DK'  
0-<1 = '<1 '  
1-<10 = ' 1-<10 '  
10-<20 = '10-<20 '  
20-<30 = '20-<30 '  
30-<40 = '30-<40 '
```

## SAS ALGORITHM FOR DEMENTIA

```
40-<60 = '40-<60'  
60-<120 = '60-<120'  
120-<180 = '120-<180'  
180-744 = '180-744 (24/7)'  
9999 = '9999 Not codeable, <1 hour/day' ;
```

VALUE dhrrsmth

```
-11 = '-11:hours missing'  
-10 = '-10:days missing'  
-9 = '-9:days and hrs missing'  
-1 = '-1 Inapplicable'  
-7 = '-7 RF'  
-8 = '-8 DK'  
0-<1 = '<1'  
1-<10 = ' 1-<10'  
10-<20 = '10-<20'  
20-<30 = '20-<30'  
30-<40 = '30-<40'  
40-<60 = '40-<60'  
60-<120 = '60-<120'  
120-<180 = '120-<180'  
180-744 = '180-744 (24/7)'  
9999 = '9999 Not codeable, <1 hour/day' ;
```

Value dmissadd

```
-1 = '-1 Inapplicable'  
1 = '1 no flags and added at CL section'  
2 = '2 no flags and added at DT section'  
3 = '3 no flags and added at EW section'  
4 = '4 no flags and added at HA section'  
5 = '5 no flags and added at HO section'  
6 = '6 no flags and added at MC section'  
7 = '7 no flags and added at MO section'  
8 = '8 no flags and added at PA section'  
9 = '9 no flags and added at PE section'  
10 = '10 no flags and added at SC section'  
11 = '11 no flags and added at SN section';
```

Value d2mssadd

```
-1 = '-1 Inapplicable'  
0 = '0 no flags and added at undetermined section'  
1 = '1 no flags and added at CL section'  
2 = '2 no flags and added at DT section'  
3 = '3 no flags and added at EW section'  
4 = '4 no flags and added at HA section'  
5 = '5 no flags and added at HO section'  
6 = '6 no flags and added at MC section'  
7 = '7 no flags and added at MO section'  
8 = '8 no flags and added at PA section'  
9 = '9 no flags and added at PE section'  
10 = '10 no flags and added at SC section'  
11 = '11 no flags and added at SN section'  
12 = '12 no flags and added at CS section'  
13 = '13 no flags and added at HH section'  
14 = '14 no flags and added at IS section';
```

Value dopage3c

## SAS ALGORITHM FOR DEMENTIA

```
-9='-9 Missing'  
-8='-8 RF'  
-7='-7 DK'  
-1='-1 Inapplicable'  
1='1 UNDER 30'  
2='2 30-39'  
3='3 40-49'  
4='4 50-59'  
5='5 60-69'  
6='6 70-79'  
7='7 80-89'  
8='8 90 +';
```

```
Value dopagect  
-9='-9 Missing'  
-8='-8 DK'  
-7='-7 RF'  
-1='-1 Inapplicable'  
1='1 UNDER 20'  
2='2 20-24'  
3='3 25-29'  
4='4 30-34'  
5='5 35-39'  
6='6 40-44'  
7='7 45-49'  
8='8 50-54'  
9='9 55-59'  
10='10 60-64'  
11='11 65-69'  
12='12 70-74'  
13='13 75-79'  
14='14 80-84'  
15='15 85-89'  
16='16 90 +';
```

```
VALUE W200008W  
-7 = '-7 RF'  
-8 = '-8 DK'  
-1 = '-1 Inapplicable'  
-9 = '-9 Missing'  
1 = "1 UNDER 20"  
2 = "2 20-24"  
3 = "3 25-29"  
4 = "4 30-34"  
5 = "5 35-39"  
6 = "6 40-44"  
7 = "7 45-49"  
8 = "8 50-54"  
9 = "9 55-59"  
10 = "10 60-65"  
11 = "11 66-69"  
12 = "12 70-74"  
13 = "13 75-79"  
14 = "14 80-85"  
15 = "15 86-89"  
16 = "16 90-94"
```

## SAS ALGORITHM FOR DEMENTIA

```
17 = "17 95-99"  
18 = "18 100 +"  
;  
VALUE NumCigs  
-7 = '-7 RF'  
-8 = '-8 DK'  
-1 = '-1 Inapplicable'  
-9 = '-9 Missing'  
999 = '999 SP smokes less than 1 cigarette / day';  
  
VALUE dlmlint  
1 = '1 Last month of life interview'  
-1 = '-1 Inapplicable' ;  
  
VALUE d2intvra  
1 = '1 65 to 69'  
2 = '2 70 to 74'  
3 = '3 75 to 79'  
4 = '4 80 to 84'  
5 = '5 85 to 89'  
6 = '6 90+'  
-7 = '-7 RF'  
-8 = '-8 DK'  
-1 = '-1 Inapplicable'  
-9 = '-9 Missing' ;  
  
VALUE dad8dem  
1 = '1 DEMENTIA RESPONSE TO ANY AD8 ITEMS IN PRIOR ROUNDS'  
-1 = '-1 Inapplicable' ;  
  
VALUE dwrdirre  
1 = '1 No words remembered'  
-1 = '-1 Inapplicable'  
-9 = '-9 Missing' ;  
  
VALUE dwrdirre  
1 = '1 Refused word recall task'  
-1 = '-1 Inapplicable'  
-9 = '-9 Missing' ;  
  
VALUE A0001AB  
1 = "1 AM"  
2 = "2 PM"  
-1 = '-1 Inapplicable'  
-9 = '-9 Missing';  
  
VALUE A0002WA  
1 = "1 Yes, there is space to set up the walking course"  
2 = "2 No, there is not space to set up the walking course"  
-1 = '-1 Inapplicable'  
-9 = '-9 Missing';  
  
VALUE A0004WA  
1 = "1 None"  
2 = "2 Cane"  
3 = "3 Walker or rollator"
```

## SAS ALGORITHM FOR DEMENTIA

```
9 = "9 Other, specify"  
-1 = '-1 Inapplicable'  
-7 = '-7 RF'  
-8 = '-8 DK'  
-9 = '-9 Missing';
```

```
VALUE A0004CH  
1 = "1 No, chair stand not completed"  
2 = "2 Yes, chair stand completed"  
-1 = '-1 Inapplicable'  
-9 = '-9 Missing';
```

```
VALUE A0008CH  
1 = "1 With arms"  
2 = "2 Without arms"  
-1 = '-1 Inapplicable'  
-9 = '-9 Missing';
```

```
VALUE A0014CH  
1 = "1 1 Chair stand completed"  
2 = "2 2 Chair stands completed"  
3 = "3 3 Chair stands completed"  
4 = "4 4 Chair stands completed"  
-1 = '-1 Inapplicable'  
-9 = '-9 Missing';
```

```
VALUE BA1SS  
1 = '1 Eligible and recorded result for SxS Balance'  
2 = '2 Eligible and no recorded result for SxS Balance'  
4 = '4 Not Eligible due to exclusion criteria'  
-1 = '-1 Inapplicable'  
-9 = '-9 Missing';
```

```
VALUE BA1STAN  
1 = '1 Eligible and recorded result for Semi Tandem Balance'  
2 = '2 Eligible and no recorded result for Semi Tandem Balance'  
3 = '3 Not administered because did not complete prior balance test'  
4 = '4 Not Eligible due to exclusion criteria'  
-1 = '-1 Inapplicable'  
-9 = '-9 Missing';
```

```
VALUE BA1TAN  
1 = '1 Eligible and recorded result for full tandem balance'  
2 = '2 Eligible and no recorded result for full tandem balance'  
3 = '3 Not administered because did not complete prior balance tests'  
4 = '4 Not Eligible due to exclusion criteria'  
-1 = '-1 Inapplicable'  
-9 = '-9 Missing';
```

```
VALUE BA1OP  
1 = '1 Eligible and recorded result for one leg eyes open balance'  
2 = '2 Eligible and no recorded result for one leg eyes open balance'  
3 = '3 Not administered because did not complete prior balance tests'  
4 = '4 Not Eligible due to exclusion criteria'  
-1 = '-1 Inapplicable'  
-9 = '-9 Missing';
```

## SAS ALGORITHM FOR DEMENTIA

```
VALUE BA1CL
  1 = '1 Eligible and recorded result for one leg eyes closed balance'
  2 = '2 Eligible and no recorded result for one leg eyes closed balance'
  3 = '3 Not administered because did not complete prior balance tests'
  4 = '4 Not Eligible due to exclusion criteria'
  -1 = '-1 Inapplicable'
  -9 = '-9 Missing';

VALUE WA1WLK
  1 = '1 Eligible and recorded result for walking course'
  2 = '2 Eligible and no recorded result for walking course'
  4 = '4 Not Eligible due to exclusion criteria'
  5 = '5 Not Eligible on exclusion criteria but recorded result (SP changed
mind) '
  -1 = '-1 Inapplicable '
  -9 = '-9 Missing';

VALUE CH1SCH
  1 = '1 Eligible and recorded result for single chair stand'
  2 = '2 Eligible and no recorded result for single chair stand'
  4 = '4 Not Eligible due to exclusion criteria'
  -1 = '-1 Inapplicable'
  -9 = '-9 Missing';

VALUE CH1RSH
  1 = '1 Eligible and recorded result for repeated chair stand'
  2 = '2 Eligible and no recorded result for repeated chair stand'
  3 = '3 Not administered because did not complete single chair stand w/o
arms'
  4 = '4 Not Eligible due to exclusion criteria'
  -1 = '-1 Inapplicable'
  -9 = '-9 Missing';

VALUE GR1GRIP
  1 = '1 Eligible and recorded result for grip strength'
  2 = '2 Eligible and no recorded result for grip strength'
  4 = '4 Not Eligible due to exclusion criteria'
  -1 = '-1 Inapplicable'
  -9 = '-9 Missing';

VALUE WC1WAIST
  1 = '1 Eligible and recorded result for waist circumference'
  2 = '2 Eligible and no recorded result for waist circumference'
  -1 = '-1 Inapplicable'
  -9 = '-9 Missing';

VALUE PK1PEAK
  1 = '1 Eligible and recorded result for peak air flow'
  2 = '2 Eligible and no recorded result for peak air flow'
  -1 = '-1 Inapplicable'
  -9 = '-9 Missing';

VALUE RGT_LFT
  1 = '1 Right'
  2 = '2 Left'
  -1 = '-1 Inapplicable'
  -9 = '-9 Missing';
```

## SAS ALGORITHM FOR DEMENTIA

### VALUE PERSON

```
1 = '1 Interviewer'  
2 = '2 Sample person'  
-1 = '-1 Inapplicable'  
-9 = '-9 Missing';
```

### VALUE STAND

```
1 = '1 Standing'  
2 = '2 Sitting'  
3 = '3 Lying down'  
-1 = '-1 Inapplicable'  
-9 = '-9 Missing';
```

### VALUE EFFORT

```
1 = '1 Full effort'  
2 = '2 Less effort for health reason'  
3 = '3 Less effort for other reason'  
-1 = '-1 Inapplicable'  
-9 = '-9 Missing';
```

### VALUE WORDREC

```
1 = ' 1 LIST 1'  
2 = ' 2 LIST 2'  
3 = ' 3 LIST 3'  
-1 = '-1 Inapplicable '  
-9 = '-9 Missing';
```

### VALUE WORDRE\_N

```
-1 = '-1 Inapplicable'  
-2 = '-2 Proxy says cannot ask SP'  
-3 = '-3 Proxy says can ask SP but SP unable to answer'  
-7 = '-7 SP refused activity'  
-9 = '-9 Missing';
```

### VALUE SP30051W

```
-7 = '-7 RF'  
-8 = '-8 DK'  
-1 = '-1 Inapplicable'  
-9 = '-9 Missing'  
1 = "1 EXCELLENT"  
2 = "2 VERY GOOD"  
3 = "3 GOOD"  
4 = "4 FAIR"  
5 = "5 POOR"  
6 = "6 DOES NOT APPLY/NO CARE IN LAST MONTH OF LIFE"
```

;

### VALUE SP3019aW

```
-7 = '-7 RF'  
-8 = '-8 DK'  
-1 = '-1 Inapplicable'  
-9 = '-9 Missing'  
1 = "1 JANUARY"  
2 = "2 FEBRUARY"  
3 = "3 MARCH"  
4 = "4 APRIL"  
5 = "5 MAY"  
6 = "6 JUNE"
```



## SAS ALGORITHM FOR DEMENTIA

```
7 = "7 JULY"
8 = "8 AUGUST"
9 = "9 SEPTEMBER"
10 = "10 OCTOBER"
11 = "11 NOVEMBER"
12 = "12 DECEMBER"
90 = "90 LAST INTERVIEW INFORMATION INCORRECT"
;
VALUE RACEHISP
  1 = ' 1 White, non-hispanic'
  2 = ' 2 Black, non-hispanic'
  3 = ' 3 Other (Am Indian/Asian/Native Hawaiian/Pacific Islander/other
specify), non-Hispanic'
  4 = ' 4 Hispanic'
  5 = ' 5 More than one DKRF primary'
  6 = ' 6 DKRF'
  -9 = '-9 Missing';

VALUE SPPB_MIS
  -7 = '-7 RF'
-8 = '-8 DK'
-9 = '-9 Missing'
-1="-1 Inapplicable"
1="1 Proxy interview"
2="2 Missing walk and repeat chair and balance"
3="3 Missing walk and repeat chair"
4="4 Missing walk and balance"
5="5 Missing repeat chair and balance"
6="6 Missing walk"
7="7 Missing repeat chair"
8="8 Missing balance"
9="9 No space"
10="10 No chair"
11="11 No space walk and no chair"
12="12 No space walk and non-safety missing"
13="13 No chair and non-safety missing"
14="14 Non-safety walk"
15="15 Non-safety chair"
16="16 Non-safety balance"
17="17 Non-safety walk and chair"
18="18 Non-safety walk and balance"
19="19 Non-safety chair and balance"
20="20 Non-safety walk and chair and balance";

VALUE QUARTILES
-9="-9 Missing"
-1="-1 Inapplicable"
;
VALUE SP30025W
  -7 = '-7 RF'
  -8 = '-8 DK'
  -1 = '-1 Inapplicable'
  -9 = '-9 Missing'
  1 = "1 FREE-STANDING (DETACHED) SINGLE HOUSE"
  2 = "2 SINGLE HOUSE BUT ATTACHED TO OTHERS (ROW HOUSE, TOWNHOUSE, DUPLEX,
TRIPLEX, OR TRIPLE DECKER)"
  3 = "3 MOBILE HOME OR TRAILER"
```

## SAS ALGORITHM FOR DEMENTIA

```
4 = "4 MULTI-UNIT (2+) BUILDING"  
91 = "91 OTHER (SPECIFY)"  
;  
VALUE SP30046W  
-7 = '-7 RF'  
-8 = '-8 DK'  
-1 = '-1 Inapplicable'  
-9 = '-9 Missing'  
1 = "1 AT SP'S HOME"  
2 = "2 IN A HOSPITAL"  
3 = "3 IN A NURSING HOME"  
4 = "4 IN A HOSPICE RESIDENCE"  
5 = "5 AT SOMEONE ELSE'S HOME"  
91 = "91 SOMEWHERE ELSE (SPECIFY)"  
;  
VALUE SP30076W  
-7 = '-7 RF'  
-8 = '-8 DK'  
-1 = '-1 Inapplicable'  
-9 = '-9 Missing'  
1 = "1 YES"  
2 = "2 NO"  
7 = "7 YES, DOESNT KNOW HOW TO USE"  
;  
VALUE W300151W  
-7 = '-7 RF'  
-8 = '-8 DK'  
-1 = '-1 Inapplicable'  
-9 = '-9 Missing'  
1 = "1 VERY GOOD"  
2 = "2 GOOD"  
3 = "3 FAIR"  
4 = "4 POOR"  
5 = "5 VERY POOR" ;  
  
VALUE SP30076H  
-7 = '-7 RF'  
-8 = '-8 DK'  
-1 = '-1 Inapplicable'  
-9 = '-9 Missing'  
95 = "95 NO USUAL NUMBER OF HOURS OR DIFFERENT FROM DAY TO DAY" ;  
VALUE SP30076G  
-7 = '-7 RF'  
-8 = '-8 DK'  
-1 = '-1 Inapplicable'  
-9 = '-9 Missing'  
95 = "95 NO USUAL TIME OR DIFFERENT FROM DAY TO DAY" ;  
VALUE SP30076I  
-7 = '-7 RF'  
-8 = '-8 DK'  
-1 = '-1 Inapplicable'  
-9 = '-9 Missing'  
95 = "95 NO USUAL NUMBER OF HOURS OR DIFFERENT FROM NIGHT TO NIGHT"  
;  
VALUE SP30076J  
-7 = '-7 RF'  
-8 = '-8 DK'
```

## SAS ALGORITHM FOR DEMENTIA

```

    -1 = '-1 Inapplicable'
    -9 = '-9 Missing'
    95 = "95 NO USUAL TIME OR DIFFERENT FROM NIGHT TO NIGHT" ;
    VALUE SP30076K
    -7 = '-7 RF'
    -8 = '-8 DK'
    -1 = '-1 Inapplicable'
    -9 = '-9 Missing'
    0 = "0 LESS THAN AN HOUR"
    90 = "90 FELL ASLEEP RIGHT AWAY"
    95 = "95 NO USUAL AMOUNT OF TIME TO FALL ASLEEP OR DIFFERENT FROM
NIGHT TO NIGHT" ;
    VALUE SP30155W
    -7 = '-7 RF'
    -8 = '-8 DK'
    -1 = '-1 Inapplicable'
    -9 = '-9 Missing'
    1 = "1 NAPS PLANNED"
    2 = "2 FELL ASLEEP WITHOUT MEANING TO"
    3 = "3 BOTH (SOME PLANNED/SOME NOT)" ;
    VALUE SP30120W
    -7 = '-7 RF'
    -8 = '-8 DK'
    -1 = '-1 Inapplicable'
    -9 = '-9 Missing'
    1 = "1 OFTEN"
    2 = "2 SOMETIMES"
    3 = "3 RARELY"
    4 = "4 NEVER" ;
Value HOURSF
-13='-13 SP deceased/section not administered'
-12='-12 Valid skip/staff'
-11='-11 Hours missing'
-10='-10 Days missing'
-9='-9 Days and hrs missing'
-1='-1 Inapplicable'
0- 1='0-<1'
1.01- 10='1-<10'
10.01- 20='10-<20'
20.01- 30='20-<30'
30.01-40='30-<40'
40.01-60='40-<60'
60.01-120='60-<120'
120.01-180='120-<180'
180.01-744='180-744 (24/7)'
9999='9999 Not codeable, <1 hour/day';
    VALUE SP30120W
    -7 = '-7 RF'
    -8 = '-8 DK'
    -1 = '-1 Inapplicable'
    -9 = '-9 Missing'
    1 = "1 OFTEN"
    2 = "2 SOMETIMES"
    3 = "3 RARELY"
    4 = "4 NEVER"
;
    VALUE SP30118W

```

## SAS ALGORITHM FOR DEMENTIA

```
-7 = '-7 RF'
-8 = '-8 DK'
-1 = '-1 Inapplicable'
-9 = '-9 Missing'
 1 = "1 A LOT"
 2 = "2 SOME"
 3 = "3 A LITTLE"
 4 = "4 NOT AT ALL" ;
VALUE SP30141W
-7 = '-7 RF'
-8 = '-8 DK'
-1 = '-1 Inapplicable'
-9 = '-9 Missing'
 1 = "less than $27,600,"
 2 = "$27,600-$41,999,"
 3 = "$42,000-$63,999,"
 4 = "$64,000-$107,999, or"
 5 = "$108,000 or more?" ;
VALUE SP30142W
-7 = '-7 RF'
-8 = '-8 DK'
-1 = '-1 Inapplicable'
-9 = '-9 Missing'
 1 = "less than $14,000,"
 2 = "$14,000-$21,999,"
 3 = "$22,000-$35,999,"
 4 = "$36,000-$48,999, or"
 5 = "$49,000 or more?" ;
VALUE INVENT
-7 = '-7 RF'
-8 = '-8 DK'
-1 = '-1 Inapplicable'
-9 = '-9 Missing'
 104="104-Arthritis"
 107="107-Lung Disease"
 109="109-Dementia or Alzheimer's disease"
 110="110-Cancer"
 113="113-Other serious disease, illness, health problem"
 114="114-Knee surgery/problem"
 115="115-Hip repair or replacement/problem"
 117="117-Back or Spine Surgery/problem"
 121="121-Sleep Problems"
 201="201-Hearing problems"
 202="202-Sight problems"
 205="205-Pain"
 301="301-Breathing problems"
 302="302-Upper body strength movement"
 303="303-Lower body strength movement"
 304="304-Low energy"
 305="305-Balance or coordination problems"
 306="306-Walking distances"
 307="307-Climbing stairs"
 308="308-Lifting and carrying items"
 309="309-Kneeling"
 310="310-Bending"
 311="311-Reaching"
 312="312-Opening Jars"
```

## SAS ALGORITHM FOR DEMENTIA

```
313="313-Grasping"
401="401-Memory"
501="501-Getting out of bed"
502="502-Getting around inside"
503="503-Getting outside"
504="504-Travel/transportation"
601="601-Eating"
602="602-Washing"
603="603-Toileting"
604="604-Dressing"
605="605-Grooming"
701="701-Laundry"
702="702-Shopping"
703="703-Cooking"
705="705-Money matters"
706="706-Indoor cleaning and maintenance"
707="707-Outdoor cleaning and maintenance"
801="801-Medications"
802="802-Doctor visits"
804="804-Other medical self-care"
1211="1211-Working"
1442="1442-Walking/exercising pets"
1451="1451-Vehicle repair and maintenance"
1461="1461-Appliance tool, and toy use, set-up, repair, &
maintenance"
1462="1462-Computer use, set-up, repair, maintenance, and
education"
1473="1473-Household organization"
1512="1512-Looking after someone else"
1611="1611-Socializing and communicating with others-in person"
1612="1612-Socializing and communication with others by talking
on telephone"
1613="1613-Attending or hosting party, wedding or social
occasions"
1614="1614-Reading and sorting through the mail"
1621="1621-Watch television and movies"
1631="1631-Games & puzzles"
1641="1641-Arts and crafts, collecting, and hobbies, making
music"
1642="1642-Reading"
1643="1642-Writing (personal, not on computer)"
1644="1644-Listening to recorded music or radio"
1711="1711-Playing/practicing sports or taking physical activity
class/lessons"
1712="1712-Walking/jogging for exercise or pleasure or working
out"
1713="1713-Other outdoor recreation activities"
1813="1813-Religious & spiritual volunteer activities"
1901="1901-Other, no existing code"
1998="1998-Don't know"
1999="1999-Refused/blank";
VALUE W500058W
-7 = '-7 RF'
-8 = '-8 DK'
-1 = '-1 Inapplicable'
-9 = '-9 Missing'
1 = "1 MONTHS"
```

## SAS ALGORITHM FOR DEMENTIA

```
    2 = "2 YEARS" ;
VALUE W500103W
-7 = '-7 RF'
-8 = '-8 DK'
-1 = '-1 Inapplicable'
-9 = '-9 Missing'
  1 = "1 YES, A YEAR OR MORE"
  2 = "2 NO, LESS THAN A YEAR" ;
VALUE W500105W
-7 = '-7 RF'
-8 = '-8 DK'
-1 = '-1 Inapplicable'
-9 = '-9 Missing'
  1 = "1 MONTH AND YEAR"
  2 = "2 NUMBER OF MONTHS AGO"
  3 = "3 NUMBER OF YEARS AGO"
  4 = "4 AGE WHEN LAST DROVE"
  7 = "7 NEVER DROVE" ;
VALUE W500123W
-7 = '-7 RF'
-8 = '-8 DK'
-1 = '-1 Inapplicable'
-9 = '-9 Missing'
  1 = "1 STILL FAVORITE ACTIVITY"
  2 = "2 HAS A NEW FAVORITE ACTIVITY"
  95 = "95 NO FAVORITE ACTIVITY" ;
VALUE W500124W
-7 = '-7 RF'
-8 = '-8 DK'
-1 = '-1 Inapplicable'
-9 = '-9 Missing'
  1 = "1 LESS THAN 1 MONTH"
  2 = "2 1 TO 3 MONTHS"
  3 = "3 4 TO 5 MONTHS"
  4 = "4 6 OR MORE MONTHS" ;
VALUE W500125W
-7 = '-7 RF'
-8 = '-8 DK'
-1 = '-1 Inapplicable'
-9 = '-9 Missing'
  1 = "1 LESS THAN 1 WEEK"
  2 = "2 1 TO 2 WEEKS"
  3 = "3 3 TO 4 WEEKS" ;
VALUE W500126W
-7 = '-7 RF'
-8 = '-8 DK'
-1 = '-1 Inapplicable'
-9 = '-9 Missing'
  1 = "1 A FRACTURE, SPRAIN, OR INJURY"
  2 = "2 A HIP, KNEE, OR OTHER JOINT REPLACEMENT"
  3 = "3 ANOTHER MUSCULOSKELETAL CONDITION"
  4 = "4 A STROKE OR TIA"
  5 = "5 A HEART ATTACK"
  6 = "6 ANOTHER HEART CONDITION OR VASCULAR DISEASE"
  7 = "7 A BREATHING CONDITION"
  8 = "8 A NEUROLOGICAL CONDITION LIKE MS OR PARKINSONS"
  9 = "9 CANCER"
```

## SAS ALGORITHM FOR DEMENTIA

```
    94 = "94 ANOTHER CONDITION (SPECIFY)"
    95 = "95 NO MEDICAL CONDITION (IF VOLUNTEERED)" ;
VALUE W500128W
-7 = '-7 RF'
-8 = '-8 DK'
-1 = '-1 Inapplicable'
-9 = '-9 Missing'
  1 = "1 DIFFICULTY CHEWING OR SWALLOWING"
  2 = "2 DIFFICULTY SPEAKING OR BEING UNDERSTOOD"
  3 = "3 PAIN LEVEL"
  4 = "4 PROBLEM WITH BREATHING"
  5 = "5 PROBLEM WITH STRENGTH (MUSCLE WEAKNESS)"
  6 = "6 PROBLEM WITH MOVEMENT (RANGE OF MOTION)"
  7 = "7 LOW ENERGY LEVEL"
  8 = "8 PROBLEM WITH BALANCE OR COORDINATION"
  9 = "9 PROBLEM WITH FALLS"
 10 = "10 PROBLEM WITH MEMORY"
 95 = "95 NONE OF THESE PROBLEMS" ;
VALUE W500131W
-7 = '-7 RF'
-8 = '-8 DK'
-1 = '-1 Inapplicable'
-9 = '-9 Missing'
  1 = "1 AS AN OVERNIGHT PATIENT IN A HOSPITAL, NURSING HOME OR REHAD
FACILITY"
  2 = "2 AT AN OUTPATIENT CENTER, CLINIC, DRs OR THERAPISTs OFFICE"
  3 = "3 HOME"
  4 = "4 SOMEWHERE ELSE" ;
VALUE W500132W
-7 = '-7 RF'
-8 = '-8 DK'
-1 = '-1 Inapplicable'
-9 = '-9 Missing'
  1 = "1 IMPROVED"
  2 = "2 GOT WORSE"
  3 = "3 STAYED ABOUT THE SAME"
  4 = "4 VARIED/UP AND DOWN (IF VOLUNTEERED)" ;
VALUE W500133W
-7 = '-7 RF'
-8 = '-8 DK'
-1 = '-1 Inapplicable'
-9 = '-9 Missing'
  1 = "1 A LOT"
  2 = "2 SOMEWHAT"
  3 = "3 A LITTLE" ;

VALUE W500137W
-7 = '-7 RF'
-8 = '-8 DK'
-1 = '-1 Inapplicable'
-9 = '-9 Missing'
  1 = "1 WELL OFF"
  2 = "2 ABOVE AVERAGE"
  3 = "3 AVERAGE"
  4 = "4 BELOW AVERAGE"
  5 = "5 POOR" ;
VALUE W500010W
```

## SAS ALGORITHM FOR DEMENTIA

```
-7 = '-7 RF'
-8 = '-8 DK'
-1 = '-1 Inapplicable'
-9 = '-9 Missing'
  1 = "1 MOTHER ONLY"
  2 = "2 FATHER ONLY"
  3 = "3 ANOTHER RELATIVE"
  4 = "4 NON-RELATIVES"
  5 = "5 VARIED/MOVED AROUND" ;
VALUE W500142W
-7 = '-7 RF'
-8 = '-8 DK'
-1 = '-1 Inapplicable'
-9 = '-9 Missing'
  1 = "1 VERY WELL"
  2 = "2 WELL"
  3 = "3 NOT WELL"
  4 = "4 NOT AT ALL" ;
VALUE W500147W
-7 = '-7 RF'
-8 = '-8 DK'
-1 = '-1 Inapplicable'
-9 = '-9 Missing'
  1 = "1 NUMBER OF YEARS"
  2 = "2 AGE" ;
VALUE W500150W
-7 = '-7 RF'
-8 = '-8 DK'
-1 = '-1 Inapplicable'
-9 = '-9 Missing'
  1 = "1 ENTER PAYCHECK AMOUNT"
  2 = "2 ENTER PAY PER HOUR"
  3 = "3 ENTER PAY PER DAY" ;
VALUE W500151W
-7 = '-7 RF'
-8 = '-8 DK'
-1 = '-1 Inapplicable'
-9 = '-9 Missing'
  1 = "1 ENTER OCCUPATION"
  2 = "2 NEVER WORKED ENTIRE LIFE"
  3 = "3 HOMEMAKER/RAISED CHILDREN/WORKED IN THE HOME" ;
VALUE W500152W
-7 = '-7 RF'
-8 = '-8 DK'
-1 = '-1 Inapplicable'
-9 = '-9 Missing'
  1 = "1 SAME KIND OF WORK"
  2 = "2 SOMETHING DIFFERENT" ;
VALUE W500160W
-7 = '-7 RF'
-8 = '-8 DK'
-1 = '-1 Inapplicable'
-9 = '-9 Missing'
  1 = "1 MAIL"
  2 = "2 DIRECT DEPOSIT"
  3 = "3 PREPAID CARD" ;
VALUE W500165W
```



## SAS ALGORITHM FOR DEMENTIA

```
-7 = '-7 RF'
-8 = '-8 DK'
-1 = '-1 Inapplicable'
-9 = '-9 Missing'
 1 = "1 ENTER COMBINED AMOUNT"
 2 = "2 ENTER SP AND SPOUSE/PARTNER AMOUNTS SEPARATELY" ;
VALUE W500166W
-7 = '-7 RF'
-8 = '-8 DK'
-1 = '-1 Inapplicable'
-9 = '-9 Missing'
 1 = "1 LESS THAN $1,300"
 2 = "2 $1,300 TO LESS THAN $1,700"
 3 = "3 $1,700 TO LESS THAN $2,200"
 4 = "4 $2,200 TO LESS THAN $2,600"
 5 = "5 $2,600 OR MORE" ;
VALUE W500167W
-7 = '-7 RF'
-8 = '-8 DK'
-1 = '-1 Inapplicable'
-9 = '-9 Missing'
 1 = "1 LESS THAN $700"
 2 = "2 $700 TO LESS THAN $1,000"
 3 = "3 $1,000 TO LESS THAN $1,300"
 4 = "4 $1,300 TO LESS THAN $1,600"
 5 = "5 $1,600 OR MORE" ;
VALUE W500168W
-7 = '-7 RF'
-8 = '-8 DK'
-1 = '-1 Inapplicable'
-9 = '-9 Missing'
 1 = "1 LESS THAN $300"
 2 = "2 $300 TO LESS THAN $700"
 3 = "3 $700 TO LESS THAN $1,000"
 4 = "4 $1,000 OR MORE" ;
VALUE W500169W
-7 = '-7 RF'
-8 = '-8 DK'
-1 = '-1 Inapplicable'
-9 = '-9 Missing'
 1 = "1 LESS THAN $100"
 2 = "2 $100 TO LESS THAN $200"
 3 = "3 $200 TO LESS THAN $400"
 4 = "4 $400 TO LESS THAN $700"
 5 = "5 $700 OR MORE" ;
VALUE W500170W
-7 = '-7 RF'
-8 = '-8 DK'
-1 = '-1 Inapplicable'
-9 = '-9 Missing'
 1 = "1 LESS THAN $1,000"
 2 = "2 $1,000 TO LESS THAN $1,400"
 3 = "3 $1,400 TO LESS THAN $1,800"
 4 = "4 $1,800 TO LESS THAN $2,200"
 5 = "5 $2,200 OR MORE" ;
VALUE W500171W
-7 = '-7 RF'
```

## SAS ALGORITHM FOR DEMENTIA

```
-8 = '-8 DK'
-1 = '-1 Inapplicable'
-9 = '-9 Missing'
 1 = "1 LESS THAN $500"
 2 = "2 $500 TO LESS THAN $700"
 3 = "3 $700 TO LESS THAN $900"
 4 = "4 $900 TO LESS THAN $1,100"
 5 = "5 $1,100 OR MORE" ;
VALUE W500172W
-7 = '-7 RF'
-8 = '-8 DK'
-1 = '-1 Inapplicable'
-9 = '-9 Missing'
 1 = "1 LESS THAN $600"
 2 = "2 $600 TO LESS THAN $1,300"
 3 = "3 $1,300 TO LESS THAN $2,100"
 4 = "4 $2,100 TO LESS THAN $5,900"
 5 = "5 $5,900 OR MORE" ;
VALUE W500173W
-7 = '-7 RF'
-8 = '-8 DK'
-1 = '-1 Inapplicable'
-9 = '-9 Missing'
 1 = "1 LESS THAN $400"
 2 = "2 $400 TO LESS THAN $900"
 3 = "3 $900 TO LESS THAN $1,600"
 4 = "4 $1,600 TO LESS THAN $3,800"
 5 = "5 $3,800 OR MORE" ;
VALUE W500174W
-7 = '-7 RF'
-8 = '-8 DK'
-1 = '-1 Inapplicable'
-9 = '-9 Missing'
 1 = "1 LESS THAN $34,000"
 2 = "2 $34,000 TO LESS THAN $82,000"
 3 = "3 $82,000 TO LESS THAN $175,000"
 4 = "4 $175,000 TO LESS THAN $413,000"
 5 = "5 $413,000 OR MORE" ;
VALUE W500175W
-7 = '-7 RF'
-8 = '-8 DK'
-1 = '-1 Inapplicable'
-9 = '-9 Missing'
 1 = "1 LESS THAN $20,000"
 2 = "2 $20,000 TO LESS THAN $47,000"
 3 = "3 $47,000 TO LESS THAN $92,000"
 4 = "4 $92,000 TO LESS THAN $218,000"
 5 = "5 $218,000 OR MORE" ;
VALUE W500176W
-7 = '-7 RF'
-8 = '-8 DK'
-1 = '-1 Inapplicable'
-9 = '-9 Missing'
 1 = "1 LESS THAN $200"
 2 = "2 $200 TO LESS THAN $500"
 3 = "3 $500 TO LESS THAN $1,000"
 4 = "4 $1,000 TO LESS THAN $2,500"
```

## SAS ALGORITHM FOR DEMENTIA

```
    5 = "5 $2,500 OR MORE" ;
VALUE W500177W
-7 = '-7 RF'
-8 = '-8 DK'
-1 = '-1 Inapplicable'
-9 = '-9 Missing'
  1 = "1 LESS THAN $100"
  2 = "2 $100 TO LESS THAN $300"
  3 = "3 $300 TO LESS THAN $700"
  4 = "4 $700 TO LESS THAN $1,700"
  5 = "5 $1,700 OR MORE" ;
VALUE W500178W
-7 = '-7 RF'
-8 = '-8 DK'
-1 = '-1 Inapplicable'
-9 = '-9 Missing'
  1 = "1 LESS THAN $2,400"
  2 = "2 $2,400 TO LESS THAN $6,000"
  3 = "3 $6,000 TO LESS THAN $12,000"
  4 = "4 $12,000 TO LESS THAN $30,000"
  5 = "5 $30,000 OR MORE" ;
VALUE W500179W
-7 = '-7 RF'
-8 = '-8 DK'
-1 = '-1 Inapplicable'
-9 = '-9 Missing'
  1 = "1 LESS THAN $1,200"
  2 = "2 $1,200 TO LESS THAN $3,600"
  3 = "3 $3,600 TO LESS THAN $8,400"
  4 = "4 $8,400 TO LESS THAN $20,400"
  5 = "5 $20,400 OR MORE" ;
VALUE W500180W
-7 = '-7 RF'
-8 = '-8 DK'
-1 = '-1 Inapplicable'
-9 = '-9 Missing'
  1 = "1 LESS THAN $9,000"
  2 = "2 $9,000 TO LESS THAN $18,000"
  3 = "3 $18,000 TO LESS THAN $93,000"
  4 = "4 $93,000 TO LESS THAN $350,000"
  5 = "5 $350,000 OR MORE" ;
VALUE W500181W
-7 = '-7 RF'
-8 = '-8 DK'
-1 = '-1 Inapplicable'
-9 = '-9 Missing'
  1 = "1 LESS THAN $600"
  2 = "2 $600 TO LESS THAN $5,000"
  3 = "3 $5,000 TO LESS THAN $16,000"
  4 = "4 $16,000 TO LESS THAN $62,000"
  5 = "5 $62,000 OR MORE" ;
VALUE W500182W
-7 = '-7 RF'
-8 = '-8 DK'
-1 = '-1 Inapplicable'
-9 = '-9 Missing'
  1 = "1 LESS THAN $8,000"
```

## SAS ALGORITHM FOR DEMENTIA

```
2 = "2 $8,000 TO LESS THAN $62,000"  
3 = "3 $62,000 TO LESS THAN $192,000"  
4 = "4 $192,000 TO LESS THAN $213,000"  
5 = "5 $213,000 OR MORE" ;  
VALUE W500183W  
-7 = '-7 RF'  
-8 = '-8 DK'  
-1 = '-1 Inapplicable'  
-9 = '-9 Missing'  
1 = "1 LESS THAN $300"  
2 = "2 $300 TO LESS THAN $2,500"  
3 = "3 $2,500 TO LESS THAN $8,000"  
4 = "4 $8,000 TO LESS THAN $37,000"  
5 = "5 $37,000 OR MORE" ;  
VALUE W500184W  
-7 = '-7 RF'  
-8 = '-8 DK'  
-1 = '-1 Inapplicable'  
-9 = '-9 Missing'  
1 = "1 LESS THAN $11,000"  
2 = "2 $11,000 TO LESS THAN $25,000"  
3 = "3 $25,000 TO LESS THAN $50,000"  
4 = "4 $50,000 TO LESS THAN $108,000"  
5 = "5 $108,000 OR MORE" ;  
VALUE W500185W  
-7 = '-7 RF'  
-8 = '-8 DK'  
-1 = '-1 Inapplicable'  
-9 = '-9 Missing'  
1 = "1 LESS THAN $2,000"  
2 = "2 $2,000 TO LESS THAN $7,000"  
3 = "3 $7,000 TO LESS THAN $17,000"  
4 = "4 $17,000 TO LESS THAN $57,000"  
5 = "5 $57,000 OR MORE" ;  
VALUE W500186W  
-7 = '-7 RF'  
-8 = '-8 DK'  
-1 = '-1 Inapplicable'  
-9 = '-9 Missing'  
1 = "1 LESS THAN $8,000"  
2 = "2 $8,000 TO LESS THAN $13,000"  
3 = "3 $13,000 TO LESS THAN $28,000"  
4 = "4 $28,000 TO LESS THAN $54,000"  
5 = "5 $54,000 OR MORE" ;  
VALUE W500187W  
-7 = '-7 RF'  
-8 = '-8 DK'  
-1 = '-1 Inapplicable'  
-9 = '-9 Missing'  
1 = "1 LESS THAN $500"  
2 = "2 $500 TO LESS THAN $1,900"  
3 = "3 $1,900 TO LESS THAN $5,000"  
4 = "4 $5,000 TO LESS THAN $20,000"  
5 = "5 $20,000 OR MORE" ;  
VALUE W500188W  
-7 = '-7 RF'  
-8 = '-8 DK'
```

## SAS ALGORITHM FOR DEMENTIA

```
-1 = '-1 Inapplicable'
-9 = '-9 Missing'
 1 = "1 LESS THAN $200"
 2 = "2 $200 TO LESS THAN $1,000"
 3 = "3 $1,000 TO LESS THAN $4,000"
 4 = "4 $4,000 TO LESS THAN $16,000"
 5 = "5 $16,000 OR MORE" ;
VALUE W500189W
-7 = '-7 RF'
-8 = '-8 DK'
-1 = '-1 Inapplicable'
-9 = '-9 Missing'
 1 = "1 LESS THAN $400"
 2 = "2 $400 TO LESS THAN $1,000"
 3 = "3 $1,000 TO LESS THAN $2,000"
 4 = "4 $2,000 TO LESS THAN $11,000"
 5 = "5 $11,000 OR MORE" ;
VALUE W500190W
-7 = '-7 RF'
-8 = '-8 DK'
-1 = '-1 Inapplicable'
-9 = '-9 Missing'
 1 = "1 LESS THAN $30,000"
 2 = "2 $30,000 TO LESS THAN $101,000"
 3 = "3 $101,000 TO LESS THAN $247,000"
 4 = "4 $247,000 TO LESS THAN $703,000"
 5 = "5 $703,000 OR MORE" ;
VALUE W500191W
-7 = '-7 RF'
-8 = '-8 DK'
-1 = '-1 Inapplicable'
-9 = '-9 Missing'
 1 = "1 LESS THAN $18,000"
 2 = "2 $18,000 TO LESS THAN $68,000"
 3 = "3 $68,000 TO LESS THAN $122,000"
 4 = "4 $122,000 TO LESS THAN $293,000"
 5 = "5 $293,000 OR MORE" ;
VALUE W500192W
-7 = '-7 RF'
-8 = '-8 DK'
-1 = '-1 Inapplicable'
-9 = '-9 Missing'
 1 = "1 LESS THAN $3,600"
 2 = "2 $3,600 TO LESS THAN $12,000"
 3 = "3 $12,000 TO LESS THAN $25,000"
 4 = "4 $25,000 TO LESS THAN $64,000"
 5 = "5 $64,000 OR MORE" ;
VALUE W500193W
-7 = '-7 RF'
-8 = '-8 DK'
-1 = '-1 Inapplicable'
-9 = '-9 Missing'
 1 = "1 LESS THAN $3,600"
 2 = "2 $3,600 TO LESS THAN $7,200"
 3 = "3 $7,200 TO LESS THAN $14,000"
 4 = "4 $14,000 TO LESS THAN $38,000"
 5 = "5 $38,000 OR MORE" ;
```

## SAS ALGORITHM FOR DEMENTIA

```
VALUE W500194W
-7 = '-7 RF'
-8 = '-8 DK'
-1 = '-1 Inapplicable'
-9 = '-9 Missing'
1 = "1 LESS THAN $30,000"
2 = "2 $30,000 TO LESS THAN $43,000"
3 = "3 $43,000 TO LESS THAN $66,000"
4 = "4 $66,000 TO LESS THAN $109,000"
5 = "5 $109,000 OR MORE" ;

VALUE W500195W
-7 = '-7 RF'
-8 = '-8 DK'
-1 = '-1 Inapplicable'
-9 = '-9 Missing'
1 = "1 LESS THAN $18,000"
2 = "2 $18,000 TO LESS THAN $22,000"
3 = "3 $22,000 TO LESS THAN $36,000"
4 = "4 $36,000 TO LESS THAN $56,000"
5 = "5 $56,000 OR MORE" ;

VALUE W500209W
-7 = '-7 RF'
-8 = '-8 DK'
-1 = '-1 Inapplicable'
-9 = '-9 Missing'
1 = "1 YES"
2 = "2 NO"
3 = "3 CANT DO - DONT DO" ;

VALUE W500196W
-7 = '-7 RF'
-8 = '-8 DK'
-1 = '-1 Inapplicable'
-9 = '-9 Missing'
1 = "1 LESS THAN $2,500"
2 = "2 $2,500 TO LESS THAN $5,000"
3 = "3 $5,000 TO LESS THAN $10,000"
4 = "4 $10,000 TO LESS THAN $20,000"
5 = "5 $20,000 TO LESS THAN $50,000"
6 = "6 $50,000 OR MORE" ;

VALUE dage2us
0 = "0 Less than age 1"
997 = "997 Born in US"
-8 = "-8 DK"
-7 = "-7 RF"
-1 = "-1 Inapplicable";

VALUE locsp
-9 = "-9 MISSING"
-8 = "-8 DK"
-7 = "-7 RF"
-1 = "-1 Inapplicable"
1 = "1 Independent Living"
2 = "2 Assisted Living"
3 = "3 Special Care Unit"
4 = "4 Nursing Home"
8 = "8 Not Reported" ;

VALUE resid
```

## SAS ALGORITHM FOR DEMENTIA

```
-9 = '-9 Missing'  
-8 = "-8 DK"  
-7 = "-7 RF"  
-1 = "-1 Inapplicable"  
1 = "Community"  
2 = "Residential care not nursing home (SP interview)"  
3 = "Residential care not nursing home (FQ only)"  
4 = "Nursing home (SP interview)"  
5 = "Nursing home (FQ only)"  
6 = "Deceased"  
7 = "Residential care not nursing home in R1 and R2 (FQ only)"  
8 = "Nursing home in R1 and R2 (FQ only)";
```

```
VALUE residlml  
1 = "1 Community"  
2 = "2 Residential care"  
-1 = "-1 Inapplicable"  
-9 = '-9 Missing';
```

```
VALUE SP50139W  
1 = "1 White/Caucasian"  
2 = "2 Black/African American"  
3 = "3 Other"  
-7 = '-7 RF'  
-8 = '-8 DK'  
-9 = '-9 Missing';
```

```
VALUE Locat15w  
1= "1 Lives in same City and State as at age 15"  
2= "2 Lives in same state but different City (or DKRF city) as age  
15"  
3= "3 Does not live in same State as age 15"  
-1= "-1 Inapplicable"  
-7 = '-7 RF'  
-8 = '-8 DK'  
-9 = '-9 Missing';
```

```
Value dresnew  
1 = "1 same residence as last int"  
2 = "2 new residence since last int"  
-1= "-1 Inapplicable"  
-7 = '-7 RF'  
-8 = '-8 DK'  
-9 = '-9 Missing';
```

```
Value dcontnew  
1 = "1 Continuing sample from R1"  
2 = "2 New sample in R5"  
-1= "-1 Inapplicable"  
-7 = '-7 RF'  
-8 = '-8 DK'  
-9 = '-9 Missing';
```

```
VALUE DMDDEVYR  
1 = ' 1 No Mobility device use in last year/since last interview'  
2 = ' 2 Mobility device use in last year/since last interview'  
-1 = '-1 Inapplicable '  
-7 = '-7 RF'
```

## SAS ALGORITHM FOR DEMENTIA

```
-8 = '-8 DK'  
-9 = '-9 Missing';
```

### VALUE DMDEVST

```
0 = '0 less than 1 month of mobility device use'  
1 = '1 month of mobility device use'  
2 = '2 months of mobility device use'  
3 = '3 months of mobility device use'  
4 = '4 months of mobility device use'  
5 = '5 months of mobility device use'  
6 = '6 months of mobility device use'  
7 = '7 months of mobility device use'  
8 = '8 months of mobility device use'  
9 = '9 months of mobility device use'  
10 = '10 months of mobility device use'  
11 = '11 months of mobility device use'  
-7 = '-7 used last month but RF number of months of use in year'  
-8 = '-8 used last month but DK number of months of use in year'  
-1 = '-1 Inapplicable '  
-2 = '-2 Not asked of continuing sample';
```

### VALUE DMDEVEND

```
0 = '0 Between 11 and 12 months since device use ended'  
1 = '1 month since mobility device use ended'  
2 = '2 months since mobility device use ended'  
3 = '3 months since mobility device use ended'  
4 = '4 months since mobility device use ended'  
5 = '5 months since mobility device use ended'  
6 = '6 months since mobility device use ended'  
7 = '7 months since mobility device use ended'  
8 = '8 months since mobility device use ended'  
9 = '9 months since mobility device use ended'  
10 = '10 months since mobility device use ended'  
11 = '11 months since mobility device use ended'  
-7 = '-7 no use last month and RF number of months since device use  
ended'  
-8 = '-8 no use last month and DK number of months since device use  
ended'  
-1 = '-1 Inapplicable '  
-2 = '-2 Not asked of continuing sample' ;
```

### VALUE DMDHLPYR

```
1 = " 1 No mobility help in last year/since last interview"  
2 = " 2 Mobility help in last year/since last interview"  
-7 = " -7 RF"  
-8 = " -8 DK"  
-1 = " -1 Inapplicable "  
-2 = '-2 Not asked of continuing sample' ;
```

### VALUE DMDHLPST

```
0 = '0 less than 1 month of help'  
1 = '1 month of help'  
2 = '2 months of help'  
3 = '3 months of help'  
4 = '4 months of help'  
5 = '5 months of help'  
6 = '6 months of help'  
7 = '7 months of help'
```



## SAS ALGORITHM FOR DEMENTIA

```
8 = '8 months of help'
9 = '9 months of help'
10 = '10 months of help'
11 = '11 months of help'
-7 = '-7 help last month but RF number of months of help in year'
-8 = '-8 help last month but DK number of months of help in year'
-1 = " -1 Inapplicable "
-2 = " -2 Not asked of continuing sample ";
VALUE DMDHLPEN
0 = '0 less than 1 month since help ended'
1 = '1 month since help ended'
2 = '2 months since help ended'
3 = '3 months since help ended'
4 = '4 months since help ended'
5 = '5 months since help ended'
6 = '6 months since help ended'
7 = '7 months since help ended'
8 = '8 months since help ended'
9 = '9 months since help ended'
10 = '10 months since help ended'
11 = '11 months since help ended'
-7 = '-7 no help last month and RF number of months since help ended'
-8 = '-8 no help last month and DK number of months since help ended'
-1 = '-1 Inapplicable '
-2 = '-2 Not asked of continuing sample';
VALUE DMHLPYRS
0 = '0 none or less than 1 year'
997 = '997 since birth'
-7 = '-7 RF'
-8 = '-8 DK'
-1 = '-1 Inapplicable '
-2 = '-2 Not asked of continuing sample'
-9 = '-9 Missing';
VALUE DSDHLPYR
1 = ' 1 No self care help in last year/since last interview'
2 = ' 2 Self care help in last year/since last interview'
-1 = '-1 Inapplicable'
-7 = '-7 DK'
-8 = '-8 RF'
-9 = '-9 Missing';
VALUE DSHLPND
0 = ' 0 Between 11 and 12 months since self care help ended'
1 = '1 Month since self care help ended'
2 = '2 Months since self care help ended'
3 = '3 Months since self care help ended'
4 = '4 Months since self care help ended'
5 = '5 Months since self care help ended'
6 = '6 Months since self care help ended'
7 = '7 Months since self care help ended'
8 = '8 Months since self care help ended'
9 = '9 Months since self care help ended'
10 = '10 Months since self care help ended'
11 = '11 Months since self care help ended'
-7 = '-7 No help last month and RF number of months since help ended'
-8 = '-8 No help last month and DK number of months since help ended'
-1 = '-1 Inapplicable'
-2 = '-2 Not asked of continuing sample'
```

## SAS ALGORITHM FOR DEMENTIA

```
-9 = '-9 Missing' ;

VALUE DSHLPYRS
  0 = ' 0 None or less than 1 year of self care help'
-7 = '-7 RF'
-8 = '-8 DK'
-1 = '-1 Inapplicable'
  -2 = '-2 Not asked of continuing sample'
-9 = '-9 Missing'
  997 = '997 since birth';

VALUE SP5RH7W
-7 = '-7 RF'
-8 = '-8 DK'
-1 = '-1 Inapplicable'
-9 = '-9 Missing'
  1 = "1 As an overnight patient in a hospital, nursing home, or
rehab facility"
  2 = "2 At an outpatient center, clinic, or doctors office or
therapists office"
  3 = "3 At home"
  4 = "4 Somewhere else" ;

VALUE SP5LF5W
-7 = '-7 RF'
-8 = '-8 DK'
-1 = '-1 Inapplicable'
-9 = '-9 Missing'
  997 = "997 Number of hours vary each week" ;

VALUE DMH_GRP
  1 = "1 Help started"
  2 = "2 Help ended"
  3 = "3 Help both interviews with gap"
  4 = "4 Help both interviews with no gap"
  5 = "5 Help between interviews only"
  6 = "6 No help either interview or between"
 11 = "11 Help started (month started missing)"
 21 = "21 Help ended (month ended missing)"
 41 = "41 Help both interviews (DK whether gap)"
 61 = "61 No help either interview (DK whether help between)"
-9 = "-9 Missing"
-1 = "-1 Inapplicable"
  -3 = "-3 Not asked of new sample"
-999 = "-999 Not determined" ;

VALUE DMU_GRP
  1 = "1 Use started"
  2 = "2 Use ended"
  3 = "3 Use both interviews with gap"
  4 = "4 Use both interviews with no gap"
  5 = "5 Use between interviews only "
  6 = "6 No use either interview or between"
 11 = "11 Use started (month started missing)"
 21 = "21 Use ended (month ended missing)"
 41 = "41 Use both interviews (DK whether gap)"
 61 = "61 No use either interview (DK whether use between)"
-9 = "-9 Missing"
-1 = "-1 Inapplicable"
```

## SAS ALGORITHM FOR DEMENTIA

```

-3 = "-3 Not asked of new sample"
-999 = "-999 Not determined" ;

VALUE DMDS5FLG
-1 = "-1 Inapplicable"
-3 = "-3 Not asked of new sample"
0 = "0 No current SP interview"
1 = "1 No SP interview last round"
2 = "2 Died and month death missing"
3 = "3 Died <=1 month after last interview"
4 = "4 Died 12-13 months after last interview"
7 = "7 Skipped 1 or more help questions" ;

VALUE DS_GRP
1 = "1 Help started"
2 = "2 Help ended"
3 = "3 Help both interviews with gap"
4 = "4 Help both interviews with no gap"
5 = "5 Help between interviews only"
6 = "6 No help either interview or between"
11 = "11 Help started (month started missing)"
21 = "21 Help ended (month ended missing)"
41 = "41 Help both interviews (DK whether gap)"
61 = "61 No help either interview (DK whether help between)"
-9 = "-9 Missing"
-1 = "-1 Inapplicable"
-3 = "-3 Not asked of new sample"
-999 = "-999 Not determined" ;

```

```

value groupmo 1 = "1 Started"
2 = "2 Ended"
3 = "3 Both times with gap"
4 = "4 Both times no gap"
5 = "5 Between only (end missing)"
6 = "6 Neither time AND not between"
11 = "11 Started (start missing)"
21 = "21 Ended (end missing)"
41 = "41 Both times (gap missing)"
61 = "61 Neither time (between missing)"
-1 = "-1 Inapplicable"
-3 = "-3 Not asked of new sample"
-7 = "-7 RF"
-8 = "-8 DK"
-9 = "-9 Missing"
-999 = "-999 Not determined"
-99 = "-99 Partial" ;

```

```

VALUE nw_mths 0 = "0 Less than 1 month"
1 = "1 month"
2 = "2 months"
3 = "3 months"
4 = "4 months"
5 = "5 months"
6 = "6 months"
7 = "7 months"
8 = "8 months"
9 = "9 months"

```

## SAS ALGORITHM FOR DEMENTIA

```

10= "10 months"
11= "11 months"
12= "12 months"
13= "13 months"
14= "14 months"
15= "15 months"
16= "16 months"
17= "17 months"
18= "18 months"
19= "19 months"
20= "20 months"
90= "90 Last round disputed"
999= "999 No months"
-1= "-1 Inapplicable"
    -3="-3 Not asked of new sample"
-7= "-7 RF"
-8= "-8 DK"
-9= "-9 Missing"
-10= "-10 Not ascertained"
-12= "-12 Outside of range (greater than months between
interviews)"
-13= "-13 None"
-999= "-999 Not determined"
-99= "-99 Partial";
    VALUE chntinhh
1 = "1 Yes, not in household"
-1= "-1 Inapplicable"
-7= "-7 RF"
-8= "-8 DK"
-9= "-9 Missing";
    Value d4mssadd
-1=' -1 Inapplicable'
0='0 no flags and added at undetermined section'
1='1 no flags and added at CL section'
2='2 no flags and added at DT section'
3='3 no flags and added at EW section'
4='4 no flags and added at HA section'
5='5 no flags and added at HO section'
6='6 no flags and added at MC section'
7='7 no flags and added at MO section'
8='8 no flags and added at PA section'
9='9 no flags and added at PE section'
10='10 no flags and added at SC section'
11='11 no flags and added at SN section'
12='12 no flags and added at CS section'
13='13 no flags and added at HH section'
14='14 no flags and added at IS section'
15='15 no flags and added at HL section'
16='16 no flags and added at SL section';
    VALUE HA5DWHL
1 = "1 Meals on wheels last month"
-1 = "-1 Inapplicable";
    VALUE HA5DTKO
1 = "1 Restaurant or take out last month"
-1 = "-1 Inapplicable";
    VALUE RE5BLDG
-7 = '-7 RF'

```

## SAS ALGORITHM FOR DEMENTIA

```
        -8 = '-8 DK'  
        -1 = '-1 Inapplicable'  
        -9 = '-9 Missing'  
         1 = "1 Building has one floor"  
         2 = "2 Building has multiple floors" ;  
VALUE S000163W  
  1 = "1 PRIVACY MORE IMPORTANT"  
  2 = "2 SOCIALIZE MORE IMPORTANT"  
  3 = "3 BOTH IMPORTANT/CANT CHOOSE/DONT KNOW"  
    -1= "-1 Inapplicable"  
    -7= "-7 RF"  
    -8= "-8 DK"  
    -9= "-9 Missing";  
  
VALUE S000164W  
  1 = "1 SOCIALIZE MORE IMPORTANT"  
  2 = "2 PRIVACY MORE IMPORTANT"  
  3 = "3 BOTH IMPORTANT/CANT CHOOSE/DONT KNOW"  
    -1= "-1 Inapplicable"  
    -7= "-7 RF"  
    -8= "-8 DK"  
    -9= "-9 Missing";  
  
VALUE S000165W  
  1 = "1 BEING SAFE MORE IMPORTANT"  
  2 = "2 HAVING CHOICES MORE IMPORTANT"  
  3 = "3 BOTH IMPORTANT/CANT CHOOSE/DONT KNOW"  
    -1= "-1 Inapplicable"  
    -7= "-7 RF"  
    -8= "-8 DK"  
    -9= "-9 Missing" ;  
  
VALUE S000166W  
  1 = "1 HAVING CHOICES MORE IMPORTANT"  
  2 = "2 BEING SAFE MORE IMPORTANT"  
  3 = "3 BOTH IMPORTANT/CANT CHOOSE/DONT KNOW"  
    -1= "-1 Inapplicable"  
    -7= "-7 RF"  
    -8= "-8 DK"  
    -9= "-9 Missing" ;  
  
VALUE S000167W  
  1 = "1 PRIVACY MORE IMPORTANT"  
  2 = "2 BEING SAFE MORE IMPORTANT"  
  3 = "3 BOTH IMPORTANT/CANT CHOOSE/DONT KNOW"  
    -1= "-1 Inapplicable"  
    -7= "-7 RF"  
    -8= "-8 DK"  
    -9= "-9 Missing" ;  
  
VALUE S000168W  
  1 = "1 BEING SAFE MORE IMPORTANT"  
  2 = "2 PRIVACY MORE IMPORTANT"  
  3 = "3 BOTH IMPORTANT/CANT CHOOSE/DONT KNOW"  
    -1= "-1 Inapplicable"  
    -7= "-7 RF"  
    -8= "-8 DK"
```

## SAS ALGORITHM FOR DEMENTIA

```
-9= "-9 Missing" ;
```

```
VALUE S000169W
```

```
 1 = "1 SOCIALIZING MORE IMPORTANT"  
 2 = "2 HAVING CHOICES MORE IMPORTANT"  
 3 = "3 BOTH IMPORTANT/CANT CHOOSE/DONT KNOW"  
-1= "-1 Inapplicable"  
-7= "-7 RF"  
-8= "-8 DK"  
-9= "-9 Missing" ;
```

```
VALUE S000170W
```

```
 1 = "1 HAVING CHOICES MORE IMPORTANT"  
 2 = "2 SOCIALIZING MORE IMPORTANT"  
 3 = "3 BOTH IMPORTANT/CANT CHOOSE/DONT KNOW"  
-1= "-1 Inapplicable"  
-7= "-7 RF"  
-8= "-8 DK"  
-9= "-9 Missing" ;
```

```
VALUE S000171W
```

```
 1 = "1 PRIVACY MORE IMPORTANT"  
 2 = "2 HAVING CHOICES MORE IMPORTANT"  
 3 = "3 BOTH IMPORTANT/CANT CHOOSE/DONT KNOW"  
-1= "-1 Inapplicable"  
-7= "-7 RF"  
-8= "-8 DK"  
-9= "-9 Missing" ;
```

```
VALUE S000172W
```

```
 1 = "1 HAVING CHOICES MORE IMPORTANT"  
 2 = "2 PRIVACY MORE IMPORTANT"  
 3 = "3 BOTH IMPORTANT/CANT CHOOSE/DONT KNOW"  
-1= "-1 Inapplicable"  
-7= "-7 RF"  
-8= "-8 DK"  
-9= "-9 Missing" ;
```

```
VALUE S000173W
```

```
 1 = "1 SOCIALIZING MORE IMPORTANT"  
 2 = "2 BEING SAFE MORE IMPORTANT"  
 3 = "3 BOTH IMPORTANT/CANT CHOOSE/DONT KNOW"  
-1= "-1 Inapplicable"  
-7= "-7 RF"  
-8= "-8 DK"  
-9= "-9 Missing" ;
```

```
VALUE S000174W
```

```
 1 = "1 BEING SAFE MORE IMPORTANT"  
 2 = "2 SOCIALIZING MORE IMPORTANT"  
 3 = "3 BOTH IMPORTANT/CANT CHOOSE/DONT KNOW"  
-1= "-1 Inapplicable"  
-7= "-7 RF"  
-8= "-8 DK"  
-9= "-9 Missing" ;
```

```
VALUE S000175W
```

## SAS ALGORITHM FOR DEMENTIA

```
1 = "1 LESS THAN 1 HOUR"  
2 = "2 MORE THAN 1 HOUR"  
3 = "3 ABOUT 1 HOUR"  
-1= "-1 Inapplicable"  
-7= "-7 RF"  
-8= "-8 DK"  
-9= "-9 Missing" ;
```

```
VALUE S000176W
```

```
1 = "1 LESS THAN 15 MINUTES"  
2 = "2 15 MINUTES"  
3 = "3 BETWEEN 15 AND 30 MINUTES"  
4 = "4 30 MINUTES"  
5 = "5 BETWEEN 30 AND 45 MINUTES"  
6 = "6 45 MINUTES"  
7 = "7 BETWEEN 45 AND 60 MINUTES"  
-1= "-1 Inapplicable"  
-7= "-7 RF"  
-8= "-8 DK"  
-9= "-9 Missing" ;
```

```
VALUE S000177W
```

```
1 = "1 ABOUT 1 HOURS"  
2 = "2 ABOUT 2 HOURS"  
3 = "3 ABOUT 3 HOURS"  
4 = "4 ABOUT 4 HOURS"  
5 = "5 ABOUT 5 HOURS"  
6 = "6 6 OR MORE HOURS"  
-1= "-1 Inapplicable"  
-7= "-7 RF"  
-8= "-8 DK"  
-9= "-9 Missing" ;
```

```
VALUE W600001W
```

```
-7 = '-7 RF'  
-8 = '-8 DK'  
-1 = '-1 Inapplicable'  
-9 = '-9 Missing'  
1 = "1 STRONGLY AGREE"  
2 = "2 AGREE"  
3 = "3 DISAGREE"  
4 = "4 STRONGLY DISAGREE";
```

```
VALUE W600002W
```

```
-7 = '-7 RF'  
-8 = '-8 DK'  
-1 = '-1 Inapplicable'  
-9 = '-9 Missing'  
0 = "0 NONE"  
1 = "1 1-2"  
2 = "2 3-5"  
3 = "3 6-10"  
4 = "4 11-15"  
5 = "5 16-20"  
6 = "6 MORE THAN 20";
```

```
VALUE W600003W
```

```
-7 = '-7 RF'  
-8 = '-8 DK'
```

## SAS ALGORITHM FOR DEMENTIA

```
-1 = '-1 Inapplicable'
-9 = '-9 Missing'
 1 = "1 A (picture showing 4 pills)"
 2 = "2 B (picture showing 8 pills)"
 3 = "3 C (picture showing 12 pills)"
 4 = "4 D (picture showing 16 pills)"
 5 = "5 E (picture showing 20 pills)"
 6 = "6 F (picture showing 24 pills)";

      VALUE YNF
-7 = '-7 RF'
-8 = '-8 DK'
-1 = '-1 Inapplicable'
-9 = '-9 Missing'
 1 = "1 Yes"
 2 = "2 No";
      VALUE FQ6DLOCA
 1 = "1 Independent Living"
 2 = "2 Assisted Living"
 3 = "3 Special Care Unit"
 4 = "4 Nursing home"
-8 = "-8 Not reported"
-1 = "-1 Inapplicable";
      VALUE R6DRES1A
 1 = '1 Community'
 2 = '2 Residential Care'
-1 = '-1 Inapplicable'
-9 = '-9 Missing';
          VALUE SP30023W
-7 = '-7 RF'
-8 = '-8 DK'
-1 = '-1 Inapplicable'
-9 = '-9 Missing'
 1 = "1 Building has one floor"
 2 = "2 Building has multiple floors" ;
          VALUE RE5BLDG
-7 = '-7 RF'
-8 = '-8 DK'
-1 = '-1 Inapplicable'
-9 = '-9 Missing'
 1 = "1 Building has one floor"
 2 = "2 Building has multiple floors" ;
      VALUE WORDRECC
-1 = '-1 Inapplicable'
-2 = '-2 Proxy says cannot ask SP'
-3 = '-3 Proxy says can ask SP but SP unable to answer'
-7 = '-7 SP refused activity'
-9 = '-9 Missing';
          VALUE OLDMTHS
-7 = '-7 RF'
-8 = '-8 DK'
-1 = '-1 Inapplicable'
-9 = '-9 Missing';
          VALUE MONTHS
-7 = '-7 RF'
-8 = '-8 DK'
-1 = '-1 Inapplicable'
```



## SAS ALGORITHM FOR DEMENTIA

```

-9 = '-9 Missing';
      VALUE FLAGS
-1 = "-1 Inapplicable"
-3 = "-3 Not asked of new sample"
0 = "0 No current SP interview"
1 = "1 No SP interview last round"
2 = "2 Died and month death missing"
3 = "3 Died <=1 month after last interview"
4 = "4 Died 12-13 months after last interview"
7 = "7 Skipped 1 or more help questions" ;

VALUE DMDEVUSE
0 = '0 none or less than 1 year'
997 = '997 since birth'
-7 = '-7 RF'
-8 = '-8 DK'
-1 = '-1 Inapplicable '
-2 = '-2 Not asked of continuing sample'
-9 = '-9 Missing';
VALUE SPPB_MISSING
-7 = '-7 RF'
-8 = '-8 DK'
-9 = '-9 Missing'
-1="-1 Inapplicable"
1="1 Proxy interview"
2="2 Missing walk and repeat chair and balance"
3="3 Missing walk and repeat chair"
4="4 Missing walk and balance"
5="5 Missing repeat chair and balance"
6="6 Missing walk"
7="7 Missing repeat chair"
8="8 Missing balance"
9="9 No space"
10="10 No chair"
11="11 No space walk and no chair"
12="12 No space walk and non-safety missing"
13="13 No chair and non-safety missing"
14="14 Non-safety walk"
15="15 Non-safety chair"
16="16 Non-safety balance"
17="17 Non-safety walk and chair"
18="18 Non-safety walk and balance"
19="19 Non-safety chair and balance"
20="20 Non-safety walk and chair and balance";
VALUE W700BC2W
-7 = '-7 RF'
-8 = '-8 DK'
-1 = '-1 Ineligible'
-9 = '-9 Missing'
1 = "1 Eligible and consented"
2 = "2 Eligible and did not consent"
3 = "3 Ineligible, proxy respondent";
Value LMLHELPR
1 = '1 Yes'
2 = '2 No'
-8 = '-8 DK'
-7 = '-7 RF'
-2 = '-2 Helper is relative'

```

## SAS ALGORITHM FOR DEMENTIA

```
        -1 = '-1 Inapplicable';
run;

/*=====*/

/* NHATS_Round_9_Combined_PROC_FORMAT_Statement.sas */

PROC FORMAT ;

VALUE release
    -1 = '-1 Inapplicable'
    1 = '1 Main Sample'
    2 = '2 Reserve Sample'
    9 = '9 New Release Sample';

VALUE STAT_DTa
    4 = " 4 April"
    5 = " 5 May"
    6 = " 6 June"
    7 = " 7 July"
    8 = " 8 August"
    9 = " 9 September"
    10 = "10 October"
    11 = "11 November"
    99 = "99 Prior to start of field work"
    -1 = '-1 Inapplicable';

VALUE $DISP
    '10' = "10 Not Available "
    '11' = "11 Ready"
    '12' = "12 Started "
    '20' = "20 Final "
    '24' = "24 Not Required "
    '60' = "60 Complete "
    '61' = "61 Complete, NH facility"
    '62' = "62 Complete SP Deceased, Proxy Intv"
    '63' = "63 Complete SP, FQ not complete"
    '64' = "64 Complete FQ, SP not complete"
    '75' = "75 Physically/mentally unable to participate, no proxy"
    '76' = "76 Too ill to participate, no proxy"
    '77' = "77 Refusal, SP"
    '78' = "78 Language barrier"
    '79' = "79 Unable to locate"
    '80' = "80 Unavailable during field period"
    '82' = "82 Outside of PSU"
    '83' = "83 Ineligible"
    '85' = "85 Refusal, facility"
    '86' = "86 Deceased"
    '87' = "87 Refusal, proxy"
    '88' = "88 Work stopped" ;

VALUE DISP_a
    10 = "10 Not Available"
    11 = "11 Ready"
    12 = "12 Started"
    20 = "20 Final"
    24 = "24 Not Required"
```

## SAS ALGORITHM FOR DEMENTIA

```
60 = "60 Complete"  
61 = "61 Complete, NH facility"  
62 = "62 Complete SP Deceased, Proxy Intv"  
63 = "63 Complete SP, FQ not complete"  
64 = "64 Complete FQ, SP not complete "  
75 = "75 Physically/mentally unable to participate, no proxy"  
76 = "76 Too ill to participate, no proxy"  
77 = "77 Refusal, SP"  
78 = "78 Language barrier"  
79 = "79 Unable to locate"  
80 = "80 Unavailable during field period"  
82 = "82 Outside of PSU"  
83 = "83 Ineligible"  
85 = "85 Refusal, facility"  
86 = "86 Deceased"  
87 = "87 Refusal, proxy"  
88 = "88 Work stopped" ;
```

```
VALUE DISP_  
10 = "10 Not Available"  
11 = "11 Ready"  
12 = "12 Started"  
20 = "20 Final"  
24 = "24 Not Required";
```

```
VALUE DISP_F  
-1 = '-1 Inapplicable'  
10 = "10 Not Available"  
11 = "11 Ready"  
12 = "12 Started"  
20 = "20 Final"  
24 = "24 Not Required"  
60 = "60 Complete"  
61 = "61 Complete, NH facility"  
62 = "62 Complete SP Deceased, Proxy Intv"  
63 = "63 Complete SP, FQ not complete"  
64 = "64 Complete FQ, SP not complete "  
75 = "75 Physically/mentally unable to participate, no proxy"  
76 = "76 Too ill to participate, no proxy"  
77 = "77 Refusal, SP"  
78 = "78 Language barrier"  
79 = "79 Unable to locate"  
80 = "80 Unavailable during field period"  
81 = "81 Final deceased, new sample only"  
82 = "82 Outside of PSU"  
83 = "83 Ineligible"  
85 = "85 Refusal, facility"  
86 = "86 Deceased"  
87 = "87 Refusal, proxy"  
88 = "88 Work stopped"  
89 = "89 Final, Other Specify";
```

```
VALUE RFDK  
-7 = '-7 RF'  
-8 = '-8 DK'  
-1 = '-1 Inapplicable'  
-9 = '-9 Missing';
```

## SAS ALGORITHM FOR DEMENTIA

```
VALUE $RFDK_F  
'-7' = '-7 RF'  
'-8' = '-8 DK'  
'-1' = '-1 Inapplicable'  
'-9' = '-9 Missing';
```

```
VALUE RFDK_F  
-7 = '-7 RF'  
-8 = '-8 DK'  
-1 = '-1 Inapplicable'  
-9 = '-9 Missing';
```

```
VALUE RFDK_B  
-1 = '-1 Inapplicable'  
1 = '1 Yes-Breakoff';
```

```
VALUE $RFDK_C  
'-1' = '-1 Inapplicable'  
'CL' = 'CL - Closing'  
'EW' = 'EW - Economic Well-Being'  
'FQ' = 'FQ - Facility Questionnaire'  
'HL' = 'HL - Helper'  
'HW' = 'HW - Height and Weight'  
'IP' = 'IP - Insurance Plans'  
'LF' = 'LF - Labor Force'  
'PA' = 'PA - Participation'  
'PE' = 'PE - Performance'  
'WB' = 'WB - Well-being' ;
```

```
VALUE $RFDK_2C  
'-1' = '-1 Inapplicable'  
'-7' = '-7 RF'  
'-8' = '-8 DK'  
'-9' = '-9 Missing';
```

```
VALUE RFDK_Y  
1 = '1 Yes'  
-7 = '-7 RF'  
-8 = '-8 DK'  
-1 = '-1 Inapplicable'  
-9 = '-9 Missing';
```

```
VALUE RFDK_I  
0 = '0 No'  
1 = '1 Yes'  
-7 = '-7 RF'  
-8 = '-8 DK'  
-1 = '-1 Inapplicable'  
-9 = '-9 Missing';
```

```
VALUE RFDK_YN  
1 = '1 Yes'  
2 = '2 No'  
-7 = '-7 RF'  
-8 = '-8 DK'  
-1 = '-1 Inapplicable'
```

## SAS ALGORITHM FOR DEMENTIA

```
-9 = '-9 Missing';

VALUE DSTRP_G
-7 = '-7 RF'
-8 = '-8 DK'
-1 = '-1 Inapplicable'
-9 = '-9 Missing'
1 = '1 X condition and word color condition accuracy below threshold
(less than .42)'
2 = '2 word condition only below threshold (less than .42)'
3 = '3 X condition and word color condition meet criteria for accuracy'
4 = '4 fewer than 50% of X and word color condition trials answered'
999 = '999 X condition only below threshold (less than .42)';

VALUE DSTRP_R
-7 = '-7 RF'
-8 = '-8 DK'
-1 = '-1 Inapplicable'
-999 = '-999 Inapplicable'
other = 'Values ranging between -.353 and 1.115';

VALUE DSTRP_M
-7 = '-7 RF'
-8 = '-8 DK'
-1 = '-1 Inapplicable'
-999 = '-999 Inapplicable'
other = 'Values ranging between -544.732 and 924.863';

VALUE FQ_4F
-7 = '-7 RF'
-8 = '-8 DK'
-1 = '-1 Inapplicable'
-9 = '-9 Missing'
    1='1 YES'
    2='2 NO';

VALUE CHILDDDEC
1 = '1 CHILD DECEASED'
-7 = '-7 RF'
-8 = '-8 DK'
-1 = '-1 Inapplicable'
-9 = '-9 Missing';

VALUE W200001W
12 = "12 STARTED"
20 = "20 COMPLETE"
21 = "21 INELIGIBLE - NOT 65+" ;

VALUE W200008x
-7 = '-7 RF'
-8 = '-8 DK'
-1 = '-1 Inapplicable'
-9 = '-9 Missing'
1 = "1 UNDER 20"
2 = "2 20-24"
3 = "3 25-29"
4 = "4 30-34"
```

## SAS ALGORITHM FOR DEMENTIA

```
5 = "5 35-39"  
6 = "6 40-44"  
7 = "7 45-49"  
8 = "8 50-54"  
9 = "9 55-59"  
10 = "10 60-64"  
11 = "11 65-69"  
12 = "12 70-74"  
13 = "13 75-79"  
14 = "14 80-84"  
15 = "15 85-89"  
16 = "16 90 +";
```

VALUE W200009W

```
-7 = '-7 RF'  
-8 = '-8 DK'  
-1 = '-1 Inapplicable'  
-9 = '-9 Missing'  
1 = "1 SAMPLE PERSON"  
2 = "2 SPOUSE/ PARTNER"  
3 = "3 DAUGHTER"  
4 = "4 SON"  
5 = "5 DAUGHTER-IN-LAW"  
6 = "6 SON-IN-LAW"  
7 = "7 STEPDAUGHTER"  
8 = "8 STEPSON"  
9 = "9 SISTER"  
10 = "10 BROTHER"  
11 = "11 SISTER-IN-LAW"  
12 = "12 BROTHER-IN-LAW"  
13 = "13 MOTHER"  
14 = "14 STEPMOTHER"  
15 = "15 MOTHER-IN-LAW"  
16 = "16 FATHER"  
17 = "17 STEPFATHER"  
18 = "18 FATHER-IN-LAW"  
19 = "19 GRANDDAUGHTER"  
20 = "20 GRANDSON"  
21 = "21 NIECE"  
22 = "22 NEPHEW"  
23 = "23 AUNT"  
24 = "24 UNCLE"  
25 = "25 COUSIN"  
26 = "26 STEPDAUGHTER'S SON/ DAUGHTER"  
27 = "27 STEPSON'S SON/ DAUGHTER"  
28 = "28 DAUGHTER-IN-LAW'S SON/ DAUGHTER"  
29 = "29 SON-IN-LAW'S SON/ DAUGHTER"  
30 = "30 BOARDER/RENTER"  
31 = "31 PAID AIDE/ HOUSEKEEPER/ EMPLOYEE"  
32 = "32 ROOMMATE"  
33 = "33 EX-WIFE/ EX-HUSBAND"  
34 = "34 BOYFRIEND/ GIRLFRIEND"  
35 = "35 NEIGHBOR"  
36 = "36 FRIEND"  
37 = "37 SOMEONE/SERVICE AT THE PLACE SP LIVES/LIVED"  
38 = "38 CO-WORKER"  
39 = "39 MINISTER, PRIEST, OR OTHER CLERGY"
```

## SAS ALGORITHM FOR DEMENTIA

```
40 = "40 PSYCHIATRIST, PSYCHOLOGIST, COUNSELOR, OR THERAPIST"  
41 = "41 DECEASED SPOUSE/PARTNER"  
91 = "91 OTHER RELATIVE"  
92 = "92 OTHER NONRELATIVE" ;
```

```
VALUE W200002W
```

```
-7 = '-7 RF'  
-8 = '-8 DK'  
-1 = '-1 Inapplicable'  
-9 = '-9 Missing'  
1 = "1 MALE"  
2 = "2 FEMALE";
```

```
VALUE W200005W
```

```
-7 = '-7 RF'  
-8 = '-8 DK'  
-1 = '-1 Inapplicable'  
-9 = '-9 Missing'  
1 = "1 NO SCHOOLING COMPLETED"  
2 = "2 1ST-8TH GRADE"  
3 = "3 9TH-12TH GRADE (NO DIPLOMA)"  
4 = "4 HIGH SCHOOL GRADUATE (HIGH SCHOOL DIPLOMA OR EQUIVALENT)"  
5 = "5 VOCATIONAL, TECHNICAL, BUSINESS, OR TRADE SCHOOL CERTIFICATE OR  
DIPLOMA (BEYOND HIGH SCHOOL LEVEL)"  
6 = "6 SOME COLLEGE BUT NO DEGREE"  
7 = "7 ASSOCIATE'S DEGREE"  
8 = "8 BACHELOR'S DEGREE"  
9 = "9 MASTER'S, PROFESSIONAL, OR DOCTORAL DEGREE" ;
```

```
VALUE W200010W
```

```
-7 = '-7 RF'  
-8 = '-8 DK'  
-1 = '-1 Inapplicable'  
-9 = '-9 Missing'  
1 = "1 MARRIED"  
2 = "2 LIVING WITH A PARTNER"  
3 = "3 SEPARATED"  
4 = "4 DIVORCED"  
5 = "5 WIDOWED"  
6 = "6 NEVER MARRIED";
```

```
VALUE W200011W
```

```
-7 = '-7 RF'  
-8 = '-8 DK'  
-1 = '-1 Inapplicable'  
-9 = '-9 Missing'  
1 = "1 YES"  
2 = "2 NO"  
7 = "7 PREVIOUSLY REPORTED" ;
```

```
VALUE W200012W
```

```
-7 = '-7 RF'  
-8 = '-8 DK'  
-1 = '-1 Inapplicable'  
-9 = '-9 Missing'  
1 = "1 REGULAR"  
2 = "2 VARIED" ;
```

## SAS ALGORITHM FOR DEMENTIA

```
VALUE W200013W
-7 = '-7 RF'
-8 = '-8 DK'
-1 = '-1 Inapplicable'
-9 = '-9 Missing'
 1 = "1 SP AND/OR FAMILY"
 2 = "2 GOVERNMENT PROGRAM"
 3 = "3 INSURANCE"
91 = "91 OTHER (SPECIFY)" ;
```

```
VALUE W200015W
-7 = '-7 RF'
-8 = '-8 DK'
-1 = '-1 Inapplicable'
-9 = '-9 Missing'
 1='1 HOURLY'
 2='2 WEEKLY'
 3='3 MONTHLY'
 4='4 DID NOT PAY IN LAST MONTH'
 91 = "91 OTHER (SPECIFY)" ;
```

```
VALUE W200016W
-7 = '-7 RF'
-8 = '-8 DK'
-1 = '-1 Inapplicable'
-9 = '-9 Missing'
 1 = "1 MEDICAID"
 2 = "2 MEDICARE"
 3 = "3 STATE PROGRAM"
91 = "91 OTHER (SPECIFY)" ;
```

```
VALUE W200018W
-7 = '-7 RF'
-8 = '-8 DK'
-1 = '-1 Inapplicable'
-9 = '-9 Missing'
 1 = "1 FREE-STANDING (DETACHED) SINGLE HOUSE"
 2 = "2 SINGLE HOUSE BUT ATTACHED TO OTHERS (ROW HOUSE, TOWNHOUSE, DUPLEX,
TRIPLEX, OR TRIPLE DECKER)"
 3 = "3 MOBILE HOME OR TRAILER"
 4 = "4 MULTI-UNIT (2+) BUILDING"
91 = "91 OTHER (SPECIFY)" ;
```

```
VALUE W200020W
-7 = '-7 RF'
-8 = '-8 DK'
-1 = '-1 Inapplicable'
-9 = '-9 Missing'
 1 = "1 HOME"
 2 = "2 MULTI-UNIT"
 3 = "3 OTHER" ;
```

```
VALUE W200021W
-7 = '-7 RF'
-8 = '-8 DK'
-1 = '-1 Inapplicable'
-9 = '-9 Missing'
```



## SAS ALGORITHM FOR DEMENTIA

```
1 = "1 BUILDING HAS ONE FLOOR"  
2 = "2 BUILDING HAS MULTIPLE FLOORS" ;
```

```
VALUE W200022W
```

```
-7 = '-7 RF'  
-8 = '-8 DK'  
-1 = '-1 Inapplicable'  
-9 = '-9 Missing'  
1 = "1 HOME"  
2 = "2 APARTMENT"  
3 = "3 ROOM"  
4 = "4 UNIT"  
5 = "5 SUITE"  
6 = "6 SOMETHING ELSE (SPECIFY)" ;
```

```
VALUE W200030W
```

```
-7 = '-7 RF'  
-8 = '-8 DK'  
-1 = '-1 Inapplicable'  
-9 = '-9 Missing'  
1 = "1 SAMPLE PERSON (SP)"  
2 = "2 PROXY" ;
```

```
VALUE W200032W
```

```
-7 = '-7 RF'  
-8 = '-8 DK'  
-1 = '-1 Inapplicable'  
-9 = '-9 Missing'  
1 = "1 HOSPITAL"  
2 = "2 NURSING HOME/REHAB CENTER"  
91 = "91 OTHER (SPECIFY)" ;
```

```
VALUE W200035W
```

```
-1 = '-1 Inapplicable'  
-9 = '-9 Missing'  
1 = "1 SELF"  
2 = "2 SPOUSE/ PARTNER"  
3 = "3 DAUGHTER"  
4 = "4 SON"  
5 = "5 DAUGHTER-IN-LAW"  
6 = "6 SON-IN-LAW"  
7 = "7 STEPDAUGHTER"  
8 = "8 STEPSON"  
9 = "9 SISTER"  
10 = "10 BROTHER"  
11 = "11 SISTER-IN-LAW"  
12 = "12 BROTHER-IN-LAW"  
13 = "13 MOTHER"  
14 = "14 STEPMOTHER"  
15 = "15 MOTHER-IN-LAW"  
16 = "16 FATHER"  
17 = "17 STEPFATHER"  
18 = "18 FATHER-IN-LAW"  
19 = "19 GRANDDAUGHTER"  
20 = "20 GRANDSON"  
21 = "21 NIECE"  
22 = "22 NEPHEW"
```

## SAS ALGORITHM FOR DEMENTIA

```
23 = "23 AUNT"  
24 = "24 UNCLE"  
25 = "25 COUSIN"  
26 = "26 STEPDAUGHTER'S SON/ DAUGHTER"  
27 = "27 STEPSON'S SON/ DAUGHTER"  
28 = "28 DAUGHTER-IN-LAW'S SON/ DAUGHTER"  
29 = "29 SON-IN-LAW'S SON/ DAUGHTER"  
30 = "30 BOARDER/RENTER"  
31 = "31 PAID AIDE/ HOUSEKEEPER/ EMPLOYEE"  
32 = "32 ROOMMATE"  
33 = "33 EX-WIFE/ EX-HUSBAND"  
34 = "34 BOYFRIEND/ GIRLFRIEND"  
35 = "35 NEIGHBOR"  
36 = "36 FRIEND"  
37 = "37 SOMEONE/SERVICE FROM THE PLACE SP LIVES/DIED"  
38 = "38 CO-WORKER"  
39 = "39 MINISTER, PRIEST, OR OTHER CLERGY"  
40 = "40 PSYCHIATRIST, PSYCHOLOGIST, COUNSELOR, OR THERAPIST"  
91 = "91 OTHER RELATIVE"  
92 = "92 OTHER NONRELATIVE" ;
```

VALUE W200036W

```
-7 = '-7 RF'  
-8 = '-8 DK'  
-1 = '-1 Inapplicable'  
-9 = '-9 Missing'  
1 = "1 VERY FAMILIAR"  
2 = "2 SOMEWHAT FAMILIAR"  
3 = "3 A LITTLE FAMILIAR"  
4 = "4 NOT AT ALL FAMILIAR" ;
```

VALUE W200037W

```
-7 = '-7 RF'  
-8 = '-8 DK'  
-1 = '-1 Inapplicable'  
-9 = '-9 Missing'  
1 = "1 YES, SAME ADDRESS"  
2 = "2 NO, DIFFERENT ADDRESS"  
3 = "3 YES, SAME ADDRESS WITH MINOR CORRECTIONS" ;
```

VALUE W200038W

```
-7 = '-7 RF'  
-8 = '-8 DK'  
-1 = '-1 Inapplicable'  
-9 = '-9 Missing'  
1 = "1 JANUARY"  
2 = "2 FEBRUARY"  
3 = "3 MARCH"  
4 = "4 APRIL"  
5 = "5 MAY"  
6 = "6 JUNE"  
7 = "7 JULY"  
8 = "8 AUGUST"  
9 = "9 SEPTEMBER"  
10 = "10 OCTOBER"  
11 = "11 NOVEMBER"  
12 = "12 DECEMBER" ;
```

## SAS ALGORITHM FOR DEMENTIA

```
VALUE W200039W
-7 = '-7 RF'
-8 = '-8 DK'
-1 = '-1 Inapplicable'
-9 = '-9 Missing'
 1 = "1 2011"
 2 = "2 2012"
 3 = "3 YEAR2013"
 4 = "4 YEAR2014"
 5 = "5 YEAR2015"
 6 = "6 YEAR2016"
 7 = "7 YEAR2017"
 8 = "8 YEAR2018"
 9 = "9 YEAR2019"
10 = "10 YEAR2020" ;

VALUE W200040W
-7 = '-7 RF'
-8 = '-8 DK'
-1 = '-1 Inapplicable'
-9 = '-9 Missing'
 1 = "1 2011"
 2 = "2 2012" ;

VALUE W200041W
-7 = '-7 RF'
-8 = '-8 DK'
-1 = '-1 Inapplicable'
-9 = '-9 Missing'
 1 = "1 AT SPS OR SOMEONE ELSE'S HOME"
 2 = "2 IN A HOSPITAL"
 3 = "3 IN A NURSING HOME"
 4 = "4 IN A HOSPICE RESIDENCE"
 5 = "5 IN TRANSIT (AMBULANCE TO HOSPITAL)"
91 = "91 SOMEWHERE ELSE (SPECIFY)";

VALUE W200042W
-7 = '-7 RF'
-8 = '-8 DK'
-1 = '-1 Inapplicable'
-9 = '-9 Missing'
 1 = "1 SP'S HOME"
 2 = "2 SOMEONE ELSE'S HOME" ;

VALUE W200043W
-7 = '-7 RF'
-8 = '-8 DK'
-1 = '-1 Inapplicable'
-9 = '-9 Missing'
 1 = "1 INTENSIVE CARE UNIT"
 2 = "2 PALLIATIVE CARE UNIT"
 3 = "3 INPATIENT HOSPICE UNIT"
 4 = "4 EMERGENCY ROOM"
 5 = "5 ANOTHER KIND OF UNIT" ;

VALUE W200044W
```

## SAS ALGORITHM FOR DEMENTIA

```
-7 = '-7 RF'  
-8 = '-8 DK'  
-1 = '-1 Inapplicable'  
-9 = '-9 Missing'  
1 = "1 HOSPICE AT A HOSPITAL"  
2 = "2 HOSPICE AT A NURSING HOME"  
3 = "3 RESIDENTIAL HOSPICE"  
4 = "4 OTHER HOSPICE" ;
```

VALUE W200045W

```
-7 = '-7 RF'  
-8 = '-8 DK'  
-1 = '-1 Inapplicable'  
-9 = '-9 Missing'  
1 = "1 DAYS"  
2 = "2 WEEKS"  
3 = "3 MONTHS"  
4 = "4 YEARS" ;
```

VALUE W200046W

```
-7 = '-7 RF'  
-8 = '-8 DK'  
-1 = '-1 Inapplicable'  
-9 = '-9 Missing'  
1 = "1 AT SP'S HOME"  
2 = "2 IN A HOSPITAL"  
3 = "3 IN A NURSING HOME"  
4 = "4 IN A HOSPICE RESIDENCE"  
91 = "91 SOMEWHERE ELSE (SPECIFY)" ;
```

VALUE W200047W

```
-7 = '-7 RF'  
-8 = '-8 DK'  
-1 = '-1 Inapplicable'  
-9 = '-9 Missing'  
1 = "1 EVERY DAY"  
2 = "2 MOST DAYS"  
3 = "3 SOME DAYS"  
4 = "4 RARELY"  
5 = "5 NOT AT ALL" ;
```

VALUE W200048W

```
-7 = '-7 RF'  
-8 = '-8 DK'  
-1 = '-1 Inapplicable'  
-9 = '-9 Missing'  
1 = "1 LESS THAN WAS NEEDED"  
2 = "2 MORE THAN WAS NEEDED"  
3 = "3 ABOUT RIGHT AMOUNT" ;
```

VALUE W200049W

```
-7 = '-7 RF'  
-8 = '-8 DK'  
-1 = '-1 Inapplicable'  
-9 = '-9 Missing'  
1 = "1 YES"  
2 = "2 NO"
```

## SAS ALGORITHM FOR DEMENTIA

```
3 = "3 DOES NOT APPLY/NO CARE IN LAST MONTH OF LIFE" ;

VALUE W200050W
-7 = '-7 RF'
-8 = '-8 DK'
-1 = '-1 Inapplicable'
-9 = '-9 Missing'
1 = "1 ALWAYS"
2 = "2 USUALLY"
3 = "3 SOMETIMES"
4 = "4 NEVER"
5 = "5 DOES NOT APPLY/NO CARE IN LAST MONTH OF LIFE" ;

VALUE W200051W
-7 = '-7 RF'
-8 = '-8 DK'
-1 = '-1 Inapplicable'
-9 = '-9 Missing'
1 = "1 EXCELLENT"
2 = "2 VERY GOOD"
3 = "3 GOOD"
4 = "4 FAIR"
5 = "5 POOR" ;

VALUE W200052W
-7 = '-7 RF'
-8 = '-8 DK'
-1 = '-1 Inapplicable'
-9 = '-9 Missing'
1 = "1 NOT AT ALL"
2 = "2 SEVERAL DAYS"
3 = "3 MORE THAN HALF THE DAYS"
4 = "4 NEARLY EVERY DAY" ;

VALUE W200053W
-7 = '-7 RF'
-8 = '-8 DK'
-1 = '-1 Inapplicable'
-9 = '-9 Missing'
1 = "1 EVERY NIGHT (7 NIGHTS A WEEK)"
2 = "2 MOST NIGHTS (5-6 NIGHTS A WEEK)"
3 = "3 SOME NIGHTS (2-4 NIGHTS A WEEK)"
4 = "4 RARELY (ONCE A WEEK OR LESS)"
5 = "5 NEVER" ;

VALUE W200054W
-7 = '-7 RF'
-8 = '-8 DK'
-1 = '-1 Inapplicable'
-9 = '-9 Missing'
1 = "1 EVERY NIGHT (7 NIGHTS A WEEK)"
2 = "2 MOST NIGHTS (5-6 NIGHTS A WEEK)"
3 = "3 SOME NIGHTS (2-4 NIGHTS A WEEK)"
4 = "4 RARELY (ONCE A WEEK OR LESS)"
5 = "5 NEVER"
7 = "7 DON'T WAKE UP/NOT A PROBLEM" ;
```

## SAS ALGORITHM FOR DEMENTIA

```
VALUE W200055W
-7 = '-7 RF'
-8 = '-8 DK'
-1 = '-1 Inapplicable'
-9 = '-9 Missing'
1 = "1 PRIVATE RESIDENCE"
2 = "2 A GROUP HOME, BOARD AND CARE, OR SUPERVISED HOUSING"
3 = "3 ASSISTED LIVING FACILITY OR CONTINUING CARE RETIREMENT COMMUNITY
(CCRC)"
4 = "4 RELIGIOUS GROUP QUARTERS"
91 = "91 OTHER (SPECIFY)" ;
```

```
VALUE W200056W
-7 = '-7 RF'
-8 = '-8 DK'
-1 = '-1 Inapplicable'
-9 = '-9 Missing'
1 = "1 YES"
2 = "2 NO"
7 = "7 PLACE DOES NOT HAVE A NAME" ;
```

```
VALUE W200057W
-7 = '-7 RF'
-8 = '-8 DK'
-1 = '-1 Inapplicable'
-9 = '-9 Missing'
1 = "1 APARTMENT"
2 = "2 ROOM"
3 = "3 UNIT"
4 = "4 SUITE"
91 = "91 SOMETHING ELSE (SPECIFY)" ;
```

```
VALUE W200058W
-7 = '-7 RF'
-8 = '-8 DK'
-1 = '-1 Inapplicable'
-9 = '-9 Missing'
1 = "1 YES"
2 = "2 NO, DIFFERENT PERSON"
3 = "3 NO, NAME MISSPELLED" ;
```

```
VALUE W200060W
-7 = '-7 RF'
-8 = '-8 DK'
-1 = '-1 Inapplicable'
-9 = '-9 Missing'
1 = "1 PRIVATE RESIDENCE"
2 = "2 A GROUP HOME, BOARD AND CARE, OR SUPERVISED HOUSING"
3 = "3 ASSISTED LIVING FACILITY OR CONTINUING CARE RETIREMENT COMMUNITY
(CCRC)"
5 = "5 NURSING HOME"
91 = "91 OTHER (SPECIFY)" ;
```

```
VALUE W200061W
-7 = '-7 RF'
-8 = '-8 DK'
-1 = '-1 Inapplicable'
```

## SAS ALGORITHM FOR DEMENTIA

```
-9 = '-9 Missing'  
1 = "1 SEPARATION OR DIVORCE"  
2 = "2 DECEASED"  
3 = "3 MOVED ELSEWHERE"  
5 = "5 LAST INTERVIEW INFORMATION INCORRECT"  
8 = "8 OTHER REASON" ;
```

VALUE W200067W

```
-7 = '-7 RF'  
-8 = '-8 DK'  
-1 = '-1 Inapplicable'  
-9 = '-9 Missing'  
1 = "1 COMMON OR SHARED ENTRANCE"  
2 = "2 ENTRANCE DIRECTLY INTO HOME" ;
```

VALUE W200068W

```
-7 = '-7 RF'  
-8 = '-8 DK'  
-1 = '-1 Inapplicable'  
-9 = '-9 Missing'  
1 = "1"  
2 = "2"  
3 = "3"  
4 = "4+" ;
```

VALUE W200069W

```
-7 = '-7 RF'  
-8 = '-8 DK'  
-1 = '-1 Inapplicable'  
-9 = '-9 Missing'  
1 = "1 ALL ITEMS HERE"  
2 = "2 ADDED ONE OR MORE ITEMS" ;
```

VALUE W200070W

```
-7 = '-7 RF'  
-8 = '-8 DK'  
-1 = '-1 Inapplicable'  
-9 = '-9 Missing'  
1 = "1 MORE THAN $500"  
2 = "2 LESS THAN $500"  
3 = "3 JUST ABOUT $500" ;
```

VALUE W200071W

```
-7 = '-7 RF'  
-8 = '-8 DK'  
-1 = '-1 Inapplicable'  
-9 = '-9 Missing'  
1 = "1 MORE THAN $1,000"  
2 = "2 LESS THAN $1,000"  
3 = "3 JUST ABOUT $1,000" ;
```

VALUE W200072W

```
-7 = '-7 RF'  
-8 = '-8 DK'  
-1 = '-1 Inapplicable'  
-9 = '-9 Missing'  
1 = "1 MORE THAN $100"
```

## SAS ALGORITHM FOR DEMENTIA

```
2 = "2 LESS THAN $100"  
3 = "3 JUST ABOUT $100" ;
```

```
VALUE W200073W
```

```
-7 = '-7 RF'  
-8 = '-8 DK'  
-1 = '-1 Inapplicable'  
-9 = '-9 Missing'  
1 = "1 YES"  
2 = "2 NO"  
7 = "7 YES, DOESNT KNOW HOW TO USE A COMPUTER" ;
```

```
VALUE W200074W
```

```
-7 = '-7 RF'  
-8 = '-8 DK'  
-1 = '-1 Inapplicable'  
-9 = '-9 Missing'  
1 = "1 MOST DAYS"  
2 = "2 SOME DAYS"  
3 = "3 RARELY" ;
```

```
VALUE W200076W
```

```
-7 = '-7 RF'  
-8 = '-8 DK'  
-1 = '-1 Inapplicable'  
-9 = '-9 Missing'  
1 = "1 YES"  
2 = "2 NO"  
7 = "7 DEAF" ;
```

```
VALUE W200077W
```

```
-7 = '-7 RF'  
-8 = '-8 DK'  
-1 = '-1 Inapplicable'  
-9 = '-9 Missing'  
1 = "1 YES"  
2 = "2 NO"  
7 = "7 BLIND" ;
```

```
VALUE W200078W
```

```
-7 = '-7 RF'  
-8 = '-8 DK'  
-1 = '-1 Inapplicable'  
-9 = '-9 Missing'  
1 = "1 EVERY DAY (7 DAYS A WEEK)"  
2 = "2 MOST DAYS (5-6 DAYS A WEEK)"  
3 = "3 SOME DAYS (2-4 DAYS A WEEK)"  
4 = "4 RARELY (ONCE A WEEK OR LESS)"  
5 = "5 NEVER" ;
```

```
VALUE W200080W
```

```
-7 = '-7 RF'  
-8 = '-8 DK'  
-1 = '-1 Inapplicable'  
-9 = '-9 Missing'  
1 = "1 YES, A CHANGE"  
2 = "2 NO, NO CHANGE"
```



## SAS ALGORITHM FOR DEMENTIA

```
3 = "3 DEMENTIA/ALZHEIMER'S REPORTED BY PROXY" ;

VALUE W200081W
-7 = '-7 RF'
-8 = '-8 DK'
-1 = '-1 Inapplicable'
-9 = '-9 Missing'
1 = "1 SP HAS DEMENTIA/ALZHEIMER'S/ NOT ABLE"
2 = "2 SP IS UNABLE TO SPEAK"
3 = "3 SP IS UNABLE TO HEAR"
4 = "4 SP REFUSED"
5 = "5 PROXY REFUSED"
6 = "6 SP NOT PRESENT"
7 = "7 SP TOO ILL"
8 = "8 SP LANGUAGE BARRIER"
91 = "91 OTHER (SPECIFY)" ;

VALUE W200082W
-7 = '-7 RF'
-8 = '-8 DK'
-1 = '-1 Inapplicable'
-9 = '-9 Missing'
1 = "1 MUCH BETTER"
2 = "2 BETTER"
3 = "3 SAME"
4 = "4 WORSE"
5 = "5 MUCH WORSE" ;

VALUE W200083W
-7 = '-7 RF'
-8 = '-8 DK'
-1 = '-1 Inapplicable'
-9 = '-9 Missing'
1 = "1 YES"
2 = "2 NO/DON'T KNOW" ;

VALUE W200084W
-7 = '-7 RF'
-8 = '-8 DK'
-1 = '-1 Inapplicable'
-9 = '-9 Missing'
1 = "1 CONTINUE WITH ACTIVITY"
2 = "2 SP REFUSES ACTIVITY" ;

VALUE W200085W
-1 = '-1 Inapplicable'
-9 = '-9 Missing'
1 = "Word[1]"
2 = "Word[2]"
3 = "Word[3]"
4 = "Word[4]"
5 = "Word[5]"
6 = "Word[6]"
7 = "Word[7]"
8 = "Word[8]"
9 = "Word[9]"
10 = "Word[10]"
```

## SAS ALGORITHM FOR DEMENTIA

```
91 = "91 NO WORDS REMEMBERED"  
92 = "92 REFUSED" ;
```

```
VALUE W200086W
```

```
-7 = '-7 RF'  
-8 = '-8 DK'  
-1 = '-1 Inapplicable'  
-9 = '-9 Missing'  
1 = "1 DIFFICULTY HEARING ANY OF THE WORDS"  
2 = "2 INTERRUPTION OCCURRED WHILE LIST WAS BEING READ"  
91 = "91 OTHER PROBLEM (SPECIFY)"  
92 = "92 NO PROBLEMS OCCURRED"  
97 = "97 SP REFUSED WORD RECALL TASK" ;
```

```
VALUE W200087W
```

```
-1 = '-1 Inapplicable'  
-9 = '-9 Missing'  
1 = "1 SP ATTEMPTED CLOCK DRAWING"  
2 = "2 SP DID NOT ATTEMPT CLOCK DRAWING"  
97 = "3 SP REFUSED CLOCK DRAWING" ;
```

```
VALUE W200089W
```

```
-7 = '-7 RF'  
-8 = '-8 DK'  
-1 = '-1 Inapplicable'  
-9 = '-9 Missing'  
1 = "1 EVERY DAY (7 DAYS A WEEK)"  
2 = "2 MOST DAYS (5-6 DAYS A WEEK)"  
3 = "3 SOME DAYS (2-4 DAYS A WEEK)"  
4 = "4 RARELY (ONCE A WEEK OR LESS)"  
5 = "5 NEVER" ;
```

```
VALUE W200090W
```

```
-7 = '-7 RF'  
-8 = '-8 DK'  
-1 = '-1 Inapplicable'  
-9 = '-9 Missing'  
1 = "1 EVERY TIME"  
2 = "2 MOST TIMES"  
3 = "3 SOMETIMES"  
4 = "4 RARELY"  
5 = "5 NEVER" ;
```

```
VALUE W200092W
```

```
-7 = '-7 RF'  
-8 = '-8 DK'  
-1 = '-1 Inapplicable'  
-9 = '-9 Missing'  
1 = "1 MOST TIMES"  
2 = "2 SOMETIMES"  
3 = "3 RARELY"  
4 = "4 NEVER" ;
```

```
VALUE W200093W
```

```
-7 = '-7 RF'  
-8 = '-8 DK'  
-1 = '-1 Inapplicable'
```

## SAS ALGORITHM FOR DEMENTIA

```
-9 = '-9 Missing'  
1 = "1 NONE"  
2 = "2 A LITTLE"  
3 = "3 SOME"  
4 = "4 A LOT" ;
```

```
VALUE W200094W
```

```
-7 = '-7 RF'  
-8 = '-8 DK'  
-1 = '-1 Inapplicable'  
-9 = '-9 Missing'  
1 = "1 MORE OFTEN"  
2 = "2 LESS OFTEN"  
3 = "3 ABOUT THE SAME" ;
```

```
VALUE W200095W
```

```
-7 = '-7 RF'  
-8 = '-8 DK'  
-1 = '-1 Inapplicable'  
-9 = '-9 Missing'  
1 = "1 JANUARY"  
2 = "2 FEBRUARY"  
3 = "3 MARCH"  
4 = "4 APRIL"  
5 = "5 MAY"  
6 = "6 JUNE"  
7 = "7 JULY"  
8 = "8 AUGUST"  
9 = "9 SEPTEMBER"  
10 = "10 OCTOBER"  
11 = "11 NOVEMBER"  
12 = "12 DECEMBER"  
90 = "90 LAST INTERVIEW INFORMATION INCORRECT" ;
```

```
VALUE W200096W
```

```
-7 = '-7 RF'  
-8 = '-8 DK'  
-1 = '-1 Inapplicable'  
-9 = '-9 Missing'  
1 = "1 YES"  
2 = "2 NO"  
90 = "90 LAST INTERVIEW INFORMATION INCORRECT" ;
```

```
VALUE W200097W
```

```
-7 = '-7 RF'  
-8 = '-8 DK'  
-1 = '-1 Inapplicable'  
-9 = '-9 Missing'  
1 = "1 YES"  
2 = "2 NO / NO LONGER DRIVE" ;
```

```
VALUE W200098W
```

```
-7 = '-7 RF'  
-8 = '-8 DK'  
-1 = '-1 Inapplicable'  
-9 = '-9 Missing'  
1 = "1 YES"
```

## SAS ALGORITHM FOR DEMENTIA

```
2 = "2 NO"  
7 = "7 NO, NO RAIN OR BAD WEATHER" ;
```

```
VALUE W200099W
```

```
-7 = '-7 RF'  
-8 = '-8 DK'  
-1 = '-1 Inapplicable'  
-9 = '-9 Missing'  
1 = "1 ALWAYS DID IT BY SELF"  
2 = "2 ALWAYS DID IT TOGETHER WITH SOMEONE ELSE"  
3 = "3 SOMEONE ELSE ALWAYS DID IT"  
4 = "4 IT VARIED (MORE THAN ONE WAY)"  
5 = "5 NOT DONE IN LAST MONTH" ;
```

```
VALUE W200102W
```

```
-7 = '-7 RF'  
-8 = '-8 DK'  
-1 = '-1 Inapplicable'  
-9 = '-9 Missing'  
1 = "1 MORE OFTEN"  
2 = "2 LESS OFTEN"  
3 = "3 SAME" ;
```

```
VALUE W200106W
```

```
-7 = '-7 RF'  
-8 = '-8 DK'  
-1 = '-1 Inapplicable'  
-9 = '-9 Missing'  
1 = "1 YES"  
2 = "2 NO"  
7 = "7 ALWAYS FED THROUGH IV OR TUBE" ;
```

```
VALUE W200107W
```

```
-7 = '-7 RF'  
-8 = '-8 DK'  
-1 = '-1 Inapplicable'  
-9 = '-9 Missing'  
1 = "1 EVERY TIME"  
2 = "2 MOST TIMES"  
3 = "3 SOMETIMES"  
4 = "4 RARELY" ;
```

```
VALUE W200109W
```

```
-7 = '-7 RF'  
-8 = '-8 DK'  
-1 = '-1 Inapplicable'  
-9 = '-9 Missing'  
1 = "1 SHOWERING"  
2 = "2 TAKING BATHS"  
3 = "3 WASHING UP SOME OTHER WAY" ;
```

```
VALUE W200114W
```

```
-7 = '-7 RF'  
-8 = '-8 DK'  
-1 = '-1 Inapplicable'  
-9 = '-9 Missing'
```

## SAS ALGORITHM FOR DEMENTIA

```
1 = "1 VERY IMPORTANT"  
2 = "2 SOMEWHAT IMPORTANT"  
3 = "3 NOT SO IMPORTANT" ;
```

```
VALUE W200115W  
-7 = '-7 RF'  
-8 = '-8 DK'  
-1 = '-1 Inapplicable'  
-9 = '-9 Missing'  
1 = "1 YES"  
2 = "2 NO"  
95 = "95 NO ACTIVITY LISTED" ;
```

```
VALUE W200116W  
-7 = '-7 RF'  
-8 = '-8 DK'  
-1 = '-1 Inapplicable'  
-9 = '-9 Missing'  
1 = "1 LEFT"  
2 = "2 RIGHT"  
3 = "3 BOTH" ;
```

```
VALUE W200117W  
-7 = '-7 RF'  
-8 = '-8 DK'  
-1 = '-1 Inapplicable'  
-9 = '-9 Missing'  
1 = "1 LEFT SIDE"  
2 = "2 RIGHT SIDE"  
3 = "3 BOTH SIDES" ;
```

```
VALUE W200118W  
-7 = '-7 RF'  
-8 = '-8 DK'  
-1 = '-1 Inapplicable'  
-9 = '-9 Missing'  
1 = "1 ONE SIDE"  
2 = "2 BOTH SIDES" ;
```

```
VALUE W200119W  
-7 = '-7 RF'  
-8 = '-8 DK'  
-1 = '-1 Inapplicable'  
-9 = '-9 Missing'  
1 = "1 RECEIVE ALL TREATMENTS"  
2 = "2 STOP/REJECT ALL TREATMENTS" ;
```

```
VALUE W200120W  
-7 = '-7 RF'  
-8 = '-8 DK'  
-1 = '-1 Inapplicable'  
-9 = '-9 Missing'  
1 = "1 LIVING IN THEIR OWN HOME WITH HELP FROM FRIENDS AND FAMILY"  
2 = "2 LIVING IN THEIR OWN HOME WITH HELP FROM SOMEONE PAID TO COME IN"  
3 = "3 LIVING WITH AN ADULT CHILD"  
4 = "4 LIVING IN AN ASSISTED LIVING FACILITY OR CONTINUING CARE  
RESIDENCE"
```

## SAS ALGORITHM FOR DEMENTIA

```
5 = "5 LIVING IN A NURSING HOME" ;

VALUE W200121W
-7 = '-7 RF'
-8 = '-8 DK'
-1 = '-1 Inapplicable'
-9 = '-9 Missing'
1 = "1 YES"
2 = "2 NO"
3 = "3 DOESNT HAVE ANY MONEY TO PAY A CAREGIVER"
4 = "4 WOULD NOT USE A PAID CAREGIVER" ;

VALUE W200122W
-7 = '-7 RF'
-8 = '-8 DK'
-1 = '-1 Inapplicable'
-9 = '-9 Missing'
1 = "1 MAKE DECISIONS WITHOUT MUCH ADVICE FROM THEM"
2 = "2 GET THEIR ADVICE AND THEN MAKE DECISIONS"
3 = "3 MAKE DECISIONS TOGETHER"
4 = "4 LEAVE DECISIONS UP TO THEM" ;

VALUE W200123W
-7 = '-7 RF'
-8 = '-8 DK'
-1 = '-1 Inapplicable'
-9 = '-9 Missing'
1 = "1 HANDLE MOSTLY BY SELF"
2 = "2 HANDLE TOGETHER WITH FAMILY OR CLOSE FRIENDS"
3 = "3 FAMILY OR CLOSE FRIENDS MOSTLY HANDLE THESE THINGS"
4 = "4 IT VARIES" ;

VALUE W200124W
-7 = '-7 RF'
-8 = '-8 DK'
-1 = '-1 Inapplicable'
-9 = '-9 Missing'
1 = "1 NEVER"
2 = "2 RARELY"
3 = "3 SOMETIMES"
4 = "4 OFTEN" ;

VALUE W200126W
-7 = '-7 RF'
-8 = '-8 DK'
-1 = '-1 Inapplicable'
-9 = '-9 Missing'
1 = "1 AGREE A LOT"
2 = "2 AGREE A LITTLE"
3 = "3 DO NOT AGREE" ;

VALUE W200127W
-7 = '-7 RF'
-8 = '-8 DK'
-1 = '-1 Inapplicable'
-9 = '-9 Missing'
1 = "1 AGREE A LOT"
```

## SAS ALGORITHM FOR DEMENTIA

```
2 = "2 AGREE A LITTLE"
3 = "3 AGREE NOT AT ALL" ;

VALUE W200129W
-7 = '-7 RF'
-8 = '-8 DK'
-1 = '-1 Inapplicable'
-9 = '-9 Missing'
1 = "1 less than $1,000,"
2 = "2 $1,000 to less than $2,000,"
3 = "3 $2,000 to less than $3,000,"
4 = "4 $3,000 to less than $5,000, or"
5 = "5 $5,000 or more?" ;

VALUE W200131W
-7 = '-7 RF'
-8 = '-8 DK'
-1 = '-1 Inapplicable'
-9 = '-9 Missing'
1 = "1 YES"
2 = "2 NO"
3 = "3 RETIRED/DON'T WORK ANYMORE" ;

VALUE W200132W
-7 = '-7 RF'
-8 = '-8 DK'
-1 = '-1 Inapplicable'
-9 = '-9 Missing'
1 = "1 EVERY WEEK"
2 = "2 EVERY TWO WEEKS"
3 = "3 TWO TIMES A MONTH"
4 = "4 ONCE A MONTH"
5 = "5 DAILY"
91 = "91 OTHER SCHEDULE (SPECIFY)" ;

VALUE W200133W
-7 = '-7 RF'
-8 = '-8 DK'
-1 = '-1 Inapplicable'
-9 = '-9 Missing'
1 = "1 OWN"
2 = "2 RENT"
3 = "3 SOME OTHER ARRANGEMENT" ;

VALUE W200134W
-7 = '-7 RF'
-8 = '-8 DK'
-1 = '-1 Inapplicable'
-9 = '-9 Missing'
1 = "1 PAID OFF"
2 = "2 STILL MAKE PAYMENTS"
3 = "3 REVERSE MORTGAGE" ;

VALUE W200135W
-7 = '-7 RF'
-8 = '-8 DK'
-1 = '-1 Inapplicable'
```

## SAS ALGORITHM FOR DEMENTIA

```
-9 = '-9 Missing'
 1 = "1 less than $250,"
 2 = "2 $250-$499,"
 3 = "3 $500-$999, or"
 4 = "4 $1,000 or more?" ;
VALUE W500135W
-7 = '-7 RF'
-8 = '-8 DK'
-1 = '-1 Inapplicable'
-9 = '-9 Missing'
 1 = "1 less than $250"
 2 = "2 $250 to less than $500"
 3 = "3 $500 to less than $1,000"
 4 = "4 $1,000 to less than $3,000"
 5 = "5 $3,000 to less than $5,000"
 6 = "6 $5,000 or more?" ;
VALUE W200136W
-7 = '-7 RF'
-8 = '-8 DK'
-1 = '-1 Inapplicable'
-9 = '-9 Missing'
 1 = "1 5 YEARS"
 2 = "2 10 YEARS"
 3 = "3 LONGER THAN 10 YEARS" ;

VALUE W200137W
-7 = '-7 RF'
-8 = '-8 DK'
-1 = '-1 Inapplicable'
-9 = '-9 Missing'
 1 = "1 less than $50,000,"
 2 = "2 between $50,000 and $100,000, or"
 3 = "3 over $100,000?" ;

VALUE W200138W
-7 = '-7 RF'
-8 = '-8 DK'
-1 = '-1 Inapplicable'
-9 = '-9 Missing'
 1 = "1 less than $50,000,"
 2 = "2 $50,000-$74,999,"
 3 = "3 $75,000-$99,999,"
 4 = "4 $100,000-$199,999,"
 5 = "5 $200,000-$299,999,"
 6 = "6 $300,000-$499,999,"
 7 = "7 $500,000-$749,999, or"
 8 = "8 $750,000 or more?" ;

VALUE W200139W
-7 = '-7 RF'
-8 = '-8 DK'
-1 = '-1 Inapplicable'
-9 = '-9 Missing'
 1 = "1 PAY OFF BALANCE"
 2 = "2 PAY MINIMUM"
 3 = "3 PAY MORE THAN MINIMUM, BUT NOT ENTIRE BALANCE"
 4 = "4 DON'T HAVE ANY CREDIT CARDS" ;
```



## SAS ALGORITHM FOR DEMENTIA

```
VALUE W200140W
-7 = '-7 RF'
-8 = '-8 DK'
-1 = '-1 Inapplicable'
-9 = '-9 Missing'
1 = "1 less than $1,000,"
2 = "2 $1,000 - $1,999,"
3 = "3 $2,000 - $3,999,"
4 = "4 $4,000 - $5,999,"
5 = "5 $6,000 - $9,999,"
6 = "6 $10,000 - $19,999, or"
7 = "7 $20,000 or more?" ;

VALUE W200141W
-7 = '-7 RF'
-8 = '-8 DK'
-1 = '-1 Inapplicable'
-9 = '-9 Missing'
1 = "1 MOST"
2 = "2 SOME"
3 = "3 A LITTLE" ;

VALUE W200142W
-7 = '-7 RF'
-8 = '-8 DK'
-1 = '-1 Inapplicable'
-9 = '-9 Missing'
1 = "1 less than $500,"
2 = "2 $500 - $999,"
3 = "3 $1,000 - $1,999,"
4 = "4 $2,000 - $3,999,"
5 = "5 $4,000 - $5,999,"
6 = "6 $6,000 - $9,999,"
7 = "7 $10,000 - $19,999, or"
8 = "8 $20,000 or more?" ;

VALUE W200146W
-7 = '-7 RF'
-8 = '-8 DK'
-1 = '-1 Inapplicable'
-9 = '-9 Missing'
1 = "1 NEARLY EVERY DAY"
2 = "2 MORE THAN HALF THE DAYS"
3 = "3 SEVERAL DAYS (LESS THAN HALF)"
4 = "4 A FEW DAYS" ;

VALUE W200147W
-7 = '-7 RF'
-8 = '-8 DK'
-1 = '-1 Inapplicable'
-9 = '-9 Missing'
1 = "1 INCLUDED"
2 = "2 EXTRA CHARGE" ;

VALUE W200148W
-7 = '-7 RF'
```

## SAS ALGORITHM FOR DEMENTIA

```
-8 = '-8 DK'  
-1 = '-1 Inapplicable'  
-9 = '-9 Missing'  
1 = "1 Yes" ;
```

```
VALUE W800164W  
-7 = '-7 RF'  
-8 = '-8 DK'  
-1 = '-1 Inapplicable'  
-9 = '-9 Missing'  
1 = "1 RECEIVE ALL TREATMENTS"  
2 = "2 STOP/REJECT ALL TREATMENTS" ;
```

```
VALUE W800165W  
-7 = '-7 RF'  
-8 = '-8 DK'  
-1 = '-1 Inapplicable'  
-9 = '-9 Missing'  
1 = "1 LIVING IN THEIR OWN HOME WITH HELP FROM FRIENDS AND FAMILY"  
2 = "2 LIVING IN THEIR OWN HOME WITH HELP FROM SOMEONE PAID TO COME IN"  
3 = "3 LIVING WITH AN ADULT CHILD"  
4 = "4 LIVING IN AN ASSISTED LIVING FACILITY OR CONTINUING CARE  
RESIDENCE"  
5 = "5 LIVING IN A NURSING HOME" ;
```

```
VALUE W800166W  
-7 = '-7 RF'  
-8 = '-8 DK'  
-1 = '-1 Inapplicable'  
-9 = '-9 Missing'  
1 = "1 YES"  
2 = "2 NO"  
3 = "3 DOESNT HAVE ANY MONEY TO PAY A CAREGIVER"  
4 = "4 WOULD NOT USE A PAID CAREGIVER" ;
```

```
VALUE F200006W  
-7 = '-7 RF'  
-8 = '-8 DK'  
-1 = '-1 Inapplicable'  
-9 = '-9 Missing'  
1 = "1 FREE STANDING NURSING HOME"  
2 = "2 FREE STANDING ASSISTED LIVING FACILITY"  
3 = "3 NURSING HOME AND ASSISTED LIVING FACILITY"  
4 = "4 CONTINUING CARE RETIREMENT COMMUNITY (CCRC)"  
5 = "5 ADULT FAMILY CARE HOME"  
6 = "6 GROUP HOME"  
7 = "7 BOARD AND CARE HOME"  
8 = "8 RETIREMENT COMMUNITY OR SENIOR HOUSING (NOT CCRC)"  
91 = "91 OTHER (SPECIFY)" ;
```

```
VALUE F200007W  
-7 = '-7 RF'  
-8 = '-8 DK'  
-1 = '-1 Inapplicable'  
-9 = '-9 Missing'  
1 = "1 YES"  
2 = "2 NO" ;
```

## SAS ALGORITHM FOR DEMENTIA

```
VALUE F200008W
-7 = '-7 RF'
-8 = '-8 DK'
-1 = '-1 Inapplicable'
-9 = '-9 Missing'
 1 = "1 INDEPENDENT LIVING"
 2 = "2 ASSISTED LIVING"
 3 = "3 SPECIAL CARE, MEMORY CARE, OR ALZHEIMER'S UNIT"
 4 = "4 NURSING HOME"
91 = "91 OTHER (SPECIFY)" ;
```

```
VALUE F200009W
-7 = '-7 RF'
-8 = '-8 DK'
-1 = '-1 Inapplicable'
-9 = '-9 Missing'
 1 = "1 ASSISTED LIVING"
 2 = "2 NURSING HOME" ;
```

```
VALUE F200011W
-7 = '-7 RF'
-8 = '-8 DK'
-1 = '-1 Inapplicable'
-9 = '-9 Missing'
 1 = "1 YES, SERVICE PROVIDED AS PART OF PACKAGE"
 2 = "2 YES, SERVICE PROVIDED AT AN EXTRA CHARGE"
 3 = "3 NO, SERVICE NOT PROVIDED" ;
```

```
VALUE F200012W
-7 = '-7 RF'
-8 = '-8 DK'
-1 = '-1 Inapplicable'
-9 = '-9 Missing'
 1 = "1 SP/FAMILY"
 2 = "2 SOCIAL SECURITY/SSI"
 3 = "3 MEDICAID"
 4 = "4 MEDICARE"
 5 = "5 OTHER SOURCE" ;
```

```
VALUE I200002W
-7 = '-7 RF'
-8 = '-8 DK'
-1 = '-1 Inapplicable'
-9 = '-9 Missing'
 1 = "1 Yes"
 2 = "2 No" ;
```

```
VALUE I200003W
-7 = '-7 RF'
-8 = '-8 DK'
-1 = '-1 Inapplicable'
-9 = '-9 Missing'
 1 = "1 English"
 2 = "2 Spanish"
 3 = "3 Other (specify)" ;
```

## SAS ALGORITHM FOR DEMENTIA

```
VALUE I200005W
-7 = '-7 RF'
-8 = '-8 DK'
-1 = '-1 Inapplicable'
-9 = '-9 Missing'
 1 = "1 Friendly and interested"
 2 = "2 Cooperative but not particularly interested"
 3 = "3 Impatient and restless"
 4 = "4 Hostile" ;

VALUE I200006W
-7 = '-7 RF'
-8 = '-8 DK'
-1 = '-1 Inapplicable'
-9 = '-9 Missing'
 1 = "1 Good"
 2 = "2 Fair"
 3 = "3 Poor" ;

VALUE I200008W
-7 = '-7 RF'
-8 = '-8 DK'
-1 = '-1 Inapplicable'
-9 = '-9 Missing'
 1 = "1 All of the time"
 2 = "2 Most of the time"
 3 = "3 Some of the time"
 4 = "4 Only for the cognition and/or performance parts"
 5 = "5 None of the time" ;

VALUE I200010W
-7 = '-7 RF'
-8 = '-8 DK'
-1 = '-1 Inapplicable'
-9 = '-9 Missing'
 1 = "1 Yes"
 2 = "2 No"
 3 = "3 Interview was conducted by telephone" ;

VALUE I200012W
-7 = '-7 RF'
-8 = '-8 DK'
-1 = '-1 Inapplicable'
-9 = '-9 Missing'
 1 = "1 Yes"
 2 = "2 No"
 3 = "3 Not Administered" ;

VALUE I200013W
-7 = '-7 RF'
-8 = '-8 DK'
-1 = '-1 Inapplicable'
-9 = '-9 Missing'
 1 = "1 Yes"
 2 = "2 No" ;

VALUE I200016W
```

## SAS ALGORITHM FOR DEMENTIA

```
-7 = '-7 RF'  
-8 = '-8 DK'  
-1 = '-1 Inapplicable'  
-9 = '-9 Missing'  
1 = "1 Yes"  
2 = "2 No"  
3 = "3 Entire interview conducted by telephone" ;
```

```
VALUE I200017W
```

```
-7 = '-7 RF'  
-8 = '-8 DK'  
-1 = '-1 Inapplicable'  
-9 = '-9 Missing'  
1 = "1 Not at all cluttered"  
2 = "2 Somewhat cluttered"  
3 = "3 Very cluttered"  
4 = "4 Could not see other rooms" ;
```

```
VALUE I200018W
```

```
-7 = '-7 RF'  
-8 = '-8 DK'  
-1 = '-1 Inapplicable'  
-9 = '-9 Missing'  
1 = "1 None"  
2 = "2 A little"  
3 = "3 Some"  
4 = "4 A lot"  
5 = "5 Could not observe" ;
```

```
VALUE I200019W
```

```
-7 = '-7 RF'  
-8 = '-8 DK'  
-1 = '-1 Inapplicable'  
-9 = '-9 Missing'  
1 = "1 Yes"  
2 = "2 No"  
7 = "7 Could not observe" ;
```

```
/* DERIVED VARIABLE FORMATS */
```

```
VALUE LVGARRG
```

```
1 = '1 Alone'  
2 = '2 With spouse/partner only (spouse/partner in household)'  
3 = '3 With spouse/partner and with others'  
4 = '4 With others only'  
-1 = '-1 Inapplicable'  
-9 = '-9 Missing';
```

```
VALUE DOUTSFDF
```

```
8 = '8 Not done in last month'  
1 = '1 Did not do by self in last month'  
2 = '2 Did by self in last month/No Difficulty'  
3 = '3 Did by self in last month/Difficulty'  
4 = '4 DKRF Did by self in last month/No Difficulty'  
5 = '5 DKRF Did by self in last month/Difficulty'  
6 = '6 Did by self in last month/DKRF Difficulty'  
7 = '7 DKRF Did by self in last month/DKRF Difficulty'
```

## SAS ALGORITHM FOR DEMENTIA

```
-1 = '-1 Inapplicable'  
-9 = '-9 Missing';
```

### VALUE DOUTDEVI

```
8 = '8 Not done in last month'  
1 = '1 No use of devices to go outside in last month'  
2 = '2 Use of devices to go outside in last month'  
3 = '3 DKRF If used devices to go outside in last month'  
4 = '4 DKRF If used devices in last month'  
-1 = '-1 Inapplicable'  
-9 = '-9 Missing';
```

### VALUE DOUTHELP

```
8 = '8 Not done in last month'  
1 = '1 No help to go outside in last month'  
2 = '2 Had help to go outside in last month'  
3 = '3 DKRF If had help to go outside in last month'  
-1 = '-1 Inapplicable'  
-9 = '-9 Missing';
```

### VALUE DINSDSFD

```
8 = '8 Not done in last month'  
1 = '1 Did not do by self in last month'  
2 = '2 Did by self in last month/No Difficulty'  
3 = '3 Did by self in last month/Difficulty'  
4 = '4 DKRF Did by self in last month/No Difficulty'  
5 = '5 DKRF Did by self in last month/Difficulty'  
6 = '6 Did by self in last month/DKRF Difficulty'  
7 = '7 DKRF Did by self in last month/DKRF Difficulty'  
-1 = '-1 Inapplicable'  
-9 = '-9 Missing';
```

### VALUE DINSDDDEV

```
8 = '8 Not done in last month'  
1 = '1 No use of devices inside in last month'  
2 = '2 Use of devices inside in last month'  
3 = '3 DKRF If used devices inside in last month'  
4 = '4 DKRF On use of devices'  
-1 = '-1 Inapplicable'  
-9 = '-9 Missing';
```

### VALUE dinsdhlp

```
8 = '8 Not done in last month'  
1 = '1 No help to go around inside in last month'  
2 = '2 Had help to go around inside in last month'  
3 = '3 DKRF If had help to go around inside in last month'  
-1 = '-1 Inapplicable'  
-9 = '-9 Missing';
```

### VALUE dbedsdfd

```
1 = '1 Did not do by self in last month'  
2 = '2 Did by self in last month/No Difficulty'  
3 = '3 Did by self in last month/Difficulty'  
4 = '4 DKRF Did by self in last month/No Difficulty'  
5 = '5 DKRF Did by self in last month/Difficulty'  
6 = '6 Did by self in last month/DKRF Difficulty'  
7 = '7 DKRF Did by self in last month/DKRF Difficulty'
```

## SAS ALGORITHM FOR DEMENTIA

```
-1 = '-1 Inapplicable'  
-9 = '-9 Missing';
```

### VALUE dbeddevi

```
1 = '1 No use of cane or walker to get out of bed in last month'  
2 = '2 Use of cane or walker to get out of bed in last month'  
3 = '3 DKRF If Used cane or walker to get out of bed in last month'  
4 = '4 DKRF If used cane or walker in last month'  
-1 = '-1 Inapplicable'  
-9 = '-9 Missing';
```

### VALUE dbedhelp

```
1 = '1 No help to get out of bed in last month'  
2 = '2 Had help to get out of bed in last month'  
3 = '3 DKRF If had help to get out of bed in last month'  
-1 = '-1 Inapplicable'  
-9 = '-9 Missing';
```

### VALUE dlaunbfd

```
1 = '1 Did not do by self in last month'  
2 = '2 Did by self in last month/No Difficulty'  
3 = '3 Did by self in last month/Difficulty'  
4 = '4 DKRF Did by self in last month/No Difficulty'  
5 = '5 DKRF Did by self in last month/Difficulty'  
6 = '6 Did by self in last month/DKRF Difficulty'  
7 = '7 DKRF Did by self in last month/DKRF Difficulty'  
8 = '8 Not done in last month'  
-1 = '-1 Inapplicable'  
-9 = '-9 Missing';
```

### VALUE dlaunrea

```
1= '1 Health/functioning reason only'  
2= '2 Other reason only'  
3= '3 Both health/functioning and other'  
4= '4 Service/someone from the place SP lives'  
-7 = '-7 RF'  
-8 = '-8 DK'  
-1 = '-1 Inapplicable'  
-9 = '-9 Missing';
```

### VALUE dshopsfd

```
1 = '1 Did not do by self in last month'  
2 = '2 Did by self in last month/No Difficulty'  
3 = '3 Did by self in last month/Difficulty'  
4 = '4 DKRF Did by self in last month/No Difficulty'  
5 = '5 DKRF Did by self in last month/Difficulty'  
6 = '6 Did by self in last month/DKRF Difficulty'  
7 = '7 DKRF Did by self in last month/DKRF Difficulty'  
8 = '8 Not done in last month'  
-1 = '-1 Inapplicable'  
-9 = '-9 Missing';
```

### VALUE dshoprea

```
1= '1 Health/functioning reason only'
```

## SAS ALGORITHM FOR DEMENTIA

```
2= '2 Other reason only'  
3= '3 Both health/functioning and other'  
4= '4 Service/someone from the place SP lives'  
-7 = '-7 RF'  
-8 = '-8 DK'  
-1 = '-1 Inapplicable'  
-9 = '-9 Missing';
```

### VALUE dmealsfd

```
1 = '1 Did not do by self in last month'  
2 = '2 Did by self in last month/No Difficulty'  
3 = '3 Did by self in last month/Difficulty'  
4 = '4 DKRF Did by self in last month/No Difficulty'  
5 = '5 DKRF Did by self in last month/Difficulty'  
6 = '6 Did by self in last month/DKRF Difficulty'  
7 = '7 DKRF Did by self in last month/DKRF Difficulty'  
8 = '8 Not done in last month'  
-1 = '-1 Inapplicable'  
-9 = '-9 Missing';
```

### VALUE dmealrea

```
1= '1 Health/functioning reason only'  
2= '2 Other reason only'  
3= '3 Both health/functioning and other'  
4= '4 Service/someone from the place SP lives'  
-7 = '-7 RF'  
-8 = '-8 DK'  
-1 = '-1 Inapplicable'  
-9 = '-9 Missing';
```

### VALUE dbanksfd

```
1 = '1 Did not do by self in last month'  
2 = '2 Did by self in last month/No Difficulty'  
3 = '3 Did by self in last month/Difficulty'  
4 = '4 DKRF Did by self in last month/No Difficulty'  
5 = '5 DKRF Did by self in last month/Difficulty'  
6 = '6 Did by self in last month/DKRF Difficulty'  
7 = '7 DKRF Did by self in last month/DKRF Difficulty'  
8 = '8 Not done in last month'  
-7 = '-7 RF'  
-8 = '-8 DK'  
-1 = '-1 Inapplicable'  
-9 = '-9 Missing';
```

### VALUE dbankrea

```
1= '1 Health/functioning reason only'  
2= '2 Other reason only'  
3= '3 Both health/functioning and other'  
4= '4 Service/someone from the place SP lives'  
-7 = '-7 RF'  
-8 = '-8 DK'  
-1 = '-1 Inapplicable'  
-9 = '-9 Missing';
```

### VALUE deatdevi

```
1 = '1 No use of adapted utensils in last month'  
2 = '2 Use of adapted utensils in last month'
```



## SAS ALGORITHM FOR DEMENTIA

```
8 = '8 Not done in last month'  
3 = '3 DKRF If used adapted utensils in last month'  
-1 = '-1 Inapplicable'  
-9 = '-9 Missing';
```

### VALUE deathelp

```
1 = '1 No help eating in last month'  
2 = '2 Had help eating in last month'  
3 = '3 DKRF If had help eating in last month'  
8 = '8 Not done in last month'  
-1 = '-1 Inapplicable'  
-9 = '-9 Missing';
```

### VALUE deatsfdf

```
1 = '1 Did not do by self in last month'  
2 = '2 No Difficulty by self (and when using utensils)'  
3 = '3 Difficulty by self (and when using utensils)'  
6 = '6 Did by self in last month/DKRF Difficulty'  
7 = '7 DKRF Did by self in last month/DKRF Difficulty'  
8 = '8 Not done in last month'  
-1 = '-1 Inapplicable'  
-9 = '-9 Missing';
```

### VALUE dbathdev

```
1 = '1 No use of grab bars or bath seats in last month'  
2 = '2 Use of grab bars or bath seats in last month'  
3 = '3 DKRF If use of grab bars or bath seats in last month'  
4 = '4 DKRF If had grab bars or bath seats in last month'  
9 = '9 No bars/seats/shower/tub or washes up other way'  
-1 = '-1 Inapplicable'  
-9 = '-9 Missing';
```

### VALUE dbathhel

```
1 = '1 No help bathing in last month'  
2 = '2 Had help bathing in last month'  
3 = '3 DKRF If had help bathing in last month'  
-1 = '-1 Inapplicable'  
-9 = '-9 Missing';
```

### VALUE dbathsfd

```
1 = '1 Did not do by self in last month'  
2 = '2 No Difficulty by self (and when using grab bars or tub seat)'  
3 = '3 Difficulty by self (and when using grab bars or tub seat)'  
6 = '6 Did by self in last month/DKRF Difficulty'  
7 = '7 DKRF Did by self in last month/DKRF Difficulty'  
-1 = '-1 Inapplicable'  
-9 = '-9 Missing';
```

### VALUE dtoildev

```
1 = '1 No use of toileting devices in last month'  
2 = '2 Use of toileting devices in last month'  
3 = '3 DKRF of some and no use of other toileting devices in last month'  
-1 = '-1 Inapplicable'  
-9 = '-9 Missing';
```

### VALUE dtoilhel

```
1 = '1 No help toileting in last month'
```

## SAS ALGORITHM FOR DEMENTIA

```
2 = '2 Had help toileting in last month'  
3 = '3 DKRF If had help toileting in last month'  
-1 = '-1 Inapplicable'  
-9 = '-9 Missing';
```

```
VALUE dtoolsfd  
1 = '1 Did not do by self in last month'  
2 = '2 No Difficulty by self (and when using toileting devices)'  
3 = '3 Difficulty by self (and when using toileting devices)'  
6 = '6 Did by self in last month/DKRF Difficulty'  
7 = '7 DKRF Did by self in last month/DKRF Difficulty'  
-1 = '-1 Inapplicable'  
-9 = '-9 Missing';
```

```
VALUE ddresdev  
8 = '8 Not done in last month'  
9 = '9 DKRF If dressed in last month'  
2 = '2 Use of dressing devices in last month'  
1 = '1 No use of dressing devices in last month'  
3 = '3 DKRF If use of dressing devices in last month'  
-1 = '-1 Inapplicable'  
-9 = '-9 Missing';
```

```
VALUE ddreshel  
8 = '8 Not done in last month'  
9 = '9 DKRF If dressed in last month'  
1 = '1 No help dressing in last month'  
2 = '2 Had help dressing in last month'  
3 = '3 DKRF If had help dressing in last month'  
-1 = '-1 Inapplicable'  
-9 = '-9 Missing';
```

```
VALUE ddressfd  
1 = '1 Did not do by self in last month'  
2 = '2 No Difficulty by self (and when using dressing devices)'  
3 = '3 Difficulty by self (and when using dressing devices)'  
6 = '6 Did by self in last month/DKRF Difficulty'  
7 = '7 DKRF Did by self in last month/DKRF Difficulty'  
8 = '8 Not done in last month'  
-1 = '-1 Inapplicable'  
-9 = '-9 Missing';
```

```
VALUE dmedssfd  
1 = '1 Did not do by self in last month'  
2 = '2 Did by self in last month/No Difficulty'  
3 = '3 Did by self in last month/Difficulty'  
4 = '4 DKRF Did by self in last month/No Difficulty'  
5 = '5 DKRF Did by self in last month/Difficulty'  
6 = '6 Did by self in last month/DKRF Difficulty'  
7 = '7 DKRF Did by self in last month/DKRF Difficulty'  
8 = '8 Not done in last month'  
9 = '9 No or DKRF if medications taken in last month'  
-1 = '-1 Inapplicable'  
-9 = '-9 Missing';
```

```
VALUE dmedsrea  
1 = '1 Health/functioning reason only'  
2 = '2 Other reason only'
```

## SAS ALGORITHM FOR DEMENTIA

```
3 = '3 Both health/functioning and other'
4 = '4 Service/someone from the place SP lives'
-7 = '-7 RF'
-8 = '-8 DK'
-1 = '-1 Inapplicable'
-9 = '-9 Missing';

VALUE dmarstat
1 = '1 Married'
2 = '2 Living with a partner'
3 = '3 Separated'
4 = '4 Divorced'
5 = '5 Widowed'
6 = '6 Never married'
-7 = '-7 RF'
-8 = '-8 DK'
-1 = '-1 Inapplicable'
-9 = '-9 Missing';

VALUE DSPSAGEC
-7 = '-7 RF'
-8 = '-8 DK'
-1 = '-1 Inapplicable'
-9 = '-9 Missing'
1 = " 1 UNDER 50"
2 = " 2 50-54"
3 = " 3 55-59"
4 = " 4 60-64"
5 = " 5 65-69"
6 = " 6 70-74"
7 = " 7 75-79"
8 = " 8 80-84"
9 = " 9 85-89"
10 = "10 90 +" ;

VALUE dresid
-1 = '-1 Inapplicable'
1 = '1 Community '
2 = '2 Residential Care Resident not nursing home (SP interview
complete) '
3 = '3 Residential Care Resident not nursing home (FQ only) '
4 = '4 Nursing Home Resident';

VALUE f_dresid
-1 = '-1 Inapplicable'
1 = '1 Community '
2 = '2 Residential care not nursing home (SP interview) '
3 = '3 Residential care not nursing home (FQ only) '
4 = '4 Nursing home (SP interview) '
5 = '5 Nursing home (FQ only) '
6 = '6 Deceased'
7 = '7 Residential care not nursing home in R1 and R5 (FQ only) '
8 = '8 Nursing home in R1 and R5 (FQ only) ' ;

VALUE f2dresid
-1='-1 Inapplicable'
1 = '1 Community '
2 = '2 Residential care not nursing home (SP interview) '
3 = '3 Residential care not nursing home (FQ only) '
4 = '4 Nursing home (SP interview) '
```

## SAS ALGORITHM FOR DEMENTIA

```
5 = '5 Nursing home (FQ only)'  
6 = '6 Deceased'  
7 = '7 Residential care not nursing home in R1 and R2 (FQ only)'  
8 = '8 Nursing home in R1 and R2 (FQ only)';  
VALUE f3dresid  
  -1='-1 Inapplicable'  
  1 = '1 Community '  
  2 = '2 Residential care not nursing home (SP interview)'  
  3 = '3 Residential care not nursing home (FQ only)'  
  4 = '4 Nursing home (SP interview)'  
  5 = '5 Nursing home (FQ only)'  
  6 = '6 Deceased'  
  7 = '7 Residential care not nursing home in R1 and R3 (FQ only)'  
  8 = '8 Nursing home in R1 and R3 (FQ only)';  
VALUE f4dresid  
  -1='-1 Inapplicable'  
  1 = '1 Community '  
  2 = '2 Residential care not nursing home (SP interview)'  
  3 = '3 Residential care not nursing home (FQ only)'  
  4 = '4 Nursing home (SP interview)'  
  5 = '5 Nursing home (FQ only)'  
  6 = '6 Deceased'  
  7 = '7 Residential care not nursing home in R1 and R4 (FQ only)'  
  8 = '8 Nursing home in R1 and R4 (FQ only)';  
  
VALUE QUARTILE  
-9="-9 Missing"  
-1="-1 Inapplicable";  
  
VALUE SPPB  
-9="-9 Missing"  
-1="-1 Inapplicable";  
  
VALUE DCLCKSC  
  0 = "0 Not recognizable as a clock"  
  1 = "1 Severely distorted depiction of a clock"  
  2 = "2 Moderately distorted depiction of a clock"  
  3 = "3 Mildly distorted depiction of a clock"  
  4 = "4 Reasonably accurate depiction of a clock"  
  5 = "5 Accurate depiction of a clock (circular or square)"  
-7 = "-7 SP refused to draw clock"  
-8 = "-8 DK"  
-1 = "-1 Inapplicable"  
-2 = "-2 Proxy says cannot ask SP"  
-3 = "-3 Proxy says can ask SP but SP unable to answer"  
-4 = "-4 SP did not attempt to draw clock"  
-9 = "-9 Missing";  
  
VALUE DCLCKCL  
  1 = '1 Very clear'  
  2 = '2 Somewhat clear'  
  3 = '3 Somewhat unclear'  
  4 = '4 Very unclear'  
  5 = '5 Blank'  
-7 = '-7 SP refused to draw clock'  
-8 = '-8 DK'
```

## SAS ALGORITHM FOR DEMENTIA

```
-1 = '-1 Inapplicable'  
-2 = '-2 Proxy says cannot ask SP'  
-3 = '-3 Proxy says can ask SP but SP unable to answer'  
-4 = '-4 SP did not attempt to draw clock'  
-9 = '-9 Missing';
```

### VALUE RESULT

```
-9='-9: MISSING'  
1='1: COMPLETED W RESULTS'  
2='2: COMPLETED MISSING RESULTS'  
3='3: ATTEMPTED W RESULTS'  
4='4: ATTEMPTED MISSING RESULTS'  
5='5: NOT ATTEMPTED SAFETY'  
6='6: NOT ATTEMPTED NOT SAFETY REASON'  
7='7: NO CHAIR/NO SPACE'  
9='9: NOT ATTEMPTED/MISSING';
```

### VALUE RESULT\_SCH

```
-9='-9: MISSING'  
1='1: COMPLETED W/OUT ARMS'  
2='2: COMPLETED W ARMS'  
3='3: ATTEMPTED W RESULTS'  
4='4: ATTEMPTED MISSING RESULTS'  
5='5: NOT ATTEMPTED SAFETY'  
6='6: NOT ATTEMPTED NOT SAFETY REASON'  
7='7: NO CHAIR/SAFETY REASON'  
8='8: NO CHAIR/NOT SAFETY REAS'  
9='9: NOT ATTEMPTED/MISSING'  
10='10: CH4=1 SINGLE CHAIR NOT COMPL';
```

### VALUE RESULT\_RCH

```
-9='-9: MISSING'  
1='1: COMPLETED W/OUT ARMS'  
2='2: COMPLETED MISSING RESULTS'  
3='3: ATTEMPTED W RESULTS'  
4='4: ATTEMPTED MISSING RESULTS'  
5='5: NOT ATTEMPTED SAFETY'  
6='6: NOT ATTEMPTED NOT SAFETY REASON'  
9='9: NO CHAIR OR NOT ATTEMPTED/MISSING';
```

### VALUE ZEROSCORE

```
1="1: NOT ELIGIBLE DUE TO EXCLUSION CRITERIA"  
2="2: NOT ATTEMPTED FOR SAFETY REASON"  
3="3: ATTEMPTED CHAIR STANDS/NOT ATTEMPTED FOR SAFETY"  
4="4: ATTEMPTED"  
5="5: NEW WALKING EXCLUSION"  
9="9: NOT ASSIGNED A ZERO SCORE";
```

### VALUE D\_LMLLOC

```
1 = '1 Community'  
2 = '2 Residential Care'  
-1 = '-1 Inapplicable'  
-9 = '-9 Missing';
```

### VALUE D\_LOCSP

```
-7 = '-7 RF'  
-8 = '-8 DK'
```

## SAS ALGORITHM FOR DEMENTIA

```
-1 = '-1 Inapplicable'
-9 = '-9 Missing'
 1 = "1 Independent Living/Housing/Retirement"
 2 = "2 Assisted Living/Personal Care"
 3 = "3 Special Care, Memory or Alzheimer's Unit"
 4 = "4 Nursing Home"
 8 = "8 Not Reported" ;

VALUE PA25FMT
-1 = '-1 Inapplicable'
-8 = '-8 DK'
-9 = '-9 Missing'
111= '111 Sleeping Napping'
131= '131 Eating'
132= '132 Going out to eat'
199= '199 Other self care activities'
211= '211 Work and work-related activities'
221= '221 Other income generating activities'
241= '241 Volunteering'
299= '299 Other productive activities'
321= '321 Shopping for non-durable goods'
399= '399 Other shopping'
411= '411 Food and drink preparation'
434= '434 Outdoor Maintenance'
439= '439 Household chores (cannot tell if indoor/outdoor)'
441= '441 Animal and pet care'
442= '442 Walking and exercising pets'
449= '449 Other animal and pet care'
451= '451 Vehicle maintenance and repair'
471= '471 Financial management'
499= '499 Other household activities'
511= '511 Physical care and assistance to others'
599= '599 Other physical care'
611= '611 Socializing with others in person'
612= '612 Socializing with others on the phone'
616= '616 Socializing and communicating on the computer'
621= '621 Watching TV and movies'
631= '631 Doing puzzles or games not on computer or online'
632= '632 Gambling not online or at a casino'
636= '636 Doing puzzles or games on a computer or online'
641= '641 Arts and crafts or hobbies'
642= '642 Reading'
643= '643 Writing'
644= '644 Listening to music'
646= '646 Computer or online leisure activities'
651= '651 Smoking or other tobacco use'
652= '652 Drinking alcohol'
661= '661 Doing nothing/relaxing'
669= '669 No activity'
699= '699 Other non active leisure'
711= '711 Playing sports'
712= '712 Walking or jogging'
713= '713 Other outdoor recreating activities'
714= '714 Attending sporting events'
715= '715 Other physical activity, exercise, yoga, swimming, working out,
dancing'
718= '718 Watching sporting events'
```

## SAS ALGORITHM FOR DEMENTIA

```
721= '721 Attending arts including plays and concerts'  
723= '723 Attending movies'  
724= '724 Attending casinos'  
737= '737 Travel for leisure'  
799= '799 Other active leisure'  
811= '811 Attending religious activities'  
812= '812 Other religious and spiritual activities'  
821= '821 Attending meetings or events'  
899= '899 Other organizational activity'  
991= '991 Other miscellaneous'  
992= '992 No favorite activity'  
997= '997 Refused'  
998= '998 Dont Know'  
999= '999 Not Codeable';  
  
VALUE OCC_CODE  
1 = '1 Management Occupations: 0010-0430'  
2 = '2 Business and Financial Operations Occupations: 0500-0950'  
3 = '3 Computer and mathematical occupations: 1000-1240'  
4 = '4 Architecture and Engineering Occupations: 1300-1560'  
5 = '5 Life, Physical, and Social Science Occupations: 1600-1965'  
6 = '6 Community and Social Service Occupations: 2000-2060'  
7 = '7 Legal Occupations: 2100-2160'  
8 = '8 Education, Training, and Library Occupations: 2200-2550'  
9 = '9 Arts, Design, Entertainment, Sports, and Media Occupations: 2600-  
2960'  
10 = '10 Healthcare Practitioners and Technical Occupations: 3000-3540'  
11 = '11 Healthcare Support Occupations: 3600-3655'  
12 = '12 Protective Service Occupations: 3700-3955'  
13 = '13 Food Preparation and Serving Related Occupations: 4000-4160'  
14 = '14 Building and Grounds Cleaning and Maintenance Occupations: 4200-  
4250'  
15 = '15 Personal Care and Service Occupations: 4300-4650'  
16 = '16 Sales and Related Occupations: 4700-4965'  
17 = '17 Office and Administrative Support Occupations: 5000-5940'  
18 = '18 Farming, Fishing, and Forestry Occupations: 6000-6130'  
19 = '19 Construction and Extraction Occupations: 6200-6940'  
20 = '20 Installation, Maintenance, and Repair Occupations: 7000-7630'  
21 = '21 Production Occupations: 7700-8965'  
22 = '22 Transportation and Material Moving Occupations: 9000-9750'  
23 = '23 Military Specific Occupations: 9800-9830'  
24 = '24 No current occ (Unemployed, no work in the last 5 years, never  
worked): 9920'  
25 = '25 Blank field'  
26 = '26 Code did not match'  
94 = '94 Uncodable'  
95 = '95 Never Worked Entire Life'  
96 = '96 Homemaker/Raised Children'  
-7 = '-7 RF'  
-8 = '-8 DK'  
-1 = '-1 Inapplicable'  
-9 = '-9 Missing';  
  
Value fl_Dfac  
1 = '1 Should have routed as facility but did not'  
2 = '2 Routed as facility but determined not facility resident'  
-1 = '-1 Inapplicable';
```

## SAS ALGORITHM FOR DEMENTIA

```
VALUE PE_RSLT
  -9='-9 Missing'
  -1 = '-1 Inapplicable'
  1='1 Completed'
  2='2 Attempted'
  3='3 Not attempted' ;
VALUE dosfacd /* FOR FQ2dosfacd */
  -9= "-9 Missing"
  -8 = "-8 DK"
  -1 = "-1 INAPPLICABLE"
  1 = " 1 FREE STANDING NURSING HOME"
  2 = " 2 FREE STANDING ASSISTED LIVING FACILITY / RESIDENTIAL CARE
FACILITY"
  3 = " 3 NURSING HOME AND ASSISTED LIVING FACILITY"
  4 = " 4 CONTINUING CARE RETIREMENT COMMUNITY (CCRC)"
  5 = " 5 ADULT FAMILY CARE HOME"
  6 = " 6 GROUP HOME"
  7 = " 7 BOARD AND CARE HOME / PERSONAL CARE HOME"
  8 = " 8 RETIREMENT COMMUNITY OR SENIOR HOUSING (NOT CCRC)"
  9 = " 9 INDEPENDENT LIVING"
  10 = " 10 ASSISTED AND INDEPENDENT/RETIREMENT (NO NURSING HOME)"
  11 = " 11 HOUSING (APT, CONDO, ETC.)";
;
VALUE dosfaca /* FOR FQ2dosfaca */
  -9= "-9 Missing"
  -8 = "-8 DK"
  -1 = "-1 INAPPLICABLE"
  1 = " 1 INDEPENDENT LIVING / HOUSING / RETIREMENT "
  2 = " 2 ASSISTED LIVING / PERSONAL CARE"
  3 = " 3 SPECIAL CARE, MEMORY CARE, OR ALZHEIMER'S UNIT"
  4 = " 4 NURSING HOME" ;

VALUE INAP_YN
  1 = ' 1 Yes'
  2 = ' 2 No'
  -1 = '-1 Inapplicable' ;
VALUE CENDIV /* RE1DCENSDIV - Updated for R2 - Re-Release */
  1 = '1 Northeast Region: New England Division (ME, NH, VT, MA, RI, CT)'
  2 = '2 Northeast Region: Middle Atlantic Division (NY, NJ, PA)'
  3 = '3 Midwest Region: East North Central Division (OH, IN, IL, MI, WI)'
  4 = '4 Midwest Region: West North Central Division (MN, IA, MO, ND, SD,
NE, KS)'
  5 = '5 South Region: South Atlantic Division (DE, MD, DC, VA, WV, NC,
SC, GA, FL)'
  6 = '6 South Region: East South Central Division (KY, TN, AL, MS)'
  7 = '7 South Region: West South Central Division (AR, LA, OK, TX)'
  8 = '8 West Region: Mountain Division (MT, ID, WY, CO, NM, AZ, UT, NV)'
  9 = '9 West Region: Pacific Division (WA, OR, CA, AK, HI)'
  -9 = '-9 Missing';

VALUE W000002W
  -7 = '-7 RF'
  -8 = '-8 DK'
  -1 = '-1 Inapplicable'
  -9 = '-9 Missing'
  1 = "1 MALE"
  2 = "2 FEMALE" ;
```



## SAS ALGORITHM FOR DEMENTIA

```
VALUE W000005W
  1 = ' 1 Yes'
  2 = ' 2 No'
 -7 = '-7 RF'
 -8 = '-8 DK'
 -1 = '-1 Inapplicable'
 -9 = '-9 Missing';

VALUE R1DRESID
  -1 = '-1 Inapplicable'
  1 = '1 Community '
  2 = '2 Residential Care Resident not nursing home (SP interview
complete)'
  3 = '3 Residential Care Resident not nursing home (FQ only)'
  4 = '4 Nursing Home Resident';

VALUE W200016W
 -7 = '-7 RF'
 -8 = '-8 DK'
 -1 = '-1 Inapplicable'
 -9 = '-9 Missing'
  1 = "1 MEDICAID"
  2 = "2 MEDICARE"
  3 = "3 STATE PROGRAM"
 91 = "91 OTHER (SPECIFY)" ;

VALUE W200012W
 -7 = '-7 RF'
 -8 = '-8 DK'
 -1 = '-1 Inapplicable'
 -9 = '-9 Missing'
  1 = "1 REGULAR"
  2 = "2 VARIED" ;

VALUE W200061W
 -7 = '-7 RF'
 -8 = '-8 DK'
 -1 = '-1 Inapplicable'
 -9 = '-9 Missing'
  1 = "1 SEPARATION OR DIVORCE"
  2 = "2 DECEASED"
  3 = "3 MOVED ELSEWHERE"
  5 = "5 LAST INTERVIEW INFORMATION INCORRECT"
  8 = "8 OTHER REASON" ;

VALUE d2hrsmth
 -13= '-13 Deceased '
 -12= '-12 Zero days/wk'
 -11= '-11 Hours missing'
 -10= '-10 Days missing'
 -9 = ' -9 Days and hrs missing'
 -1 = ' -1 Inapplicable'
 -7 = ' -7 RF'
 -8 = ' -8 DK'
 0-<1 = '<1'
 1-<10 = ' 1-<10'
```

## SAS ALGORITHM FOR DEMENTIA

```
10-<20 = '10-<20'  
20-<30 = '20-<30'  
30-<40 = '30-<40'  
40-<60 = '40-<60'  
60-<120 = '60-<120'  
120-<180 = '120-<180'  
180-744 = '180-744 (24/7)'  
9999 = '9999 Not codeable, <1 hour/day' ;
```

VALUE dhrrsmth

```
-11 = '-11:hours missing'  
-10 = '-10:days missing'  
-9 = '-9:days and hrs missing'  
-1 = '-1 Inapplicable'  
-7 = '-7 RF'  
-8 = '-8 DK'  
0-<1 = '<1'  
1-<10 = ' 1-<10'  
10-<20 = '10-<20'  
20-<30 = '20-<30'  
30-<40 = '30-<40'  
40-<60 = '40-<60'  
60-<120 = '60-<120'  
120-<180 = '120-<180'  
180-744 = '180-744 (24/7)'  
9999 = '9999 Not codeable, <1 hour/day' ;
```

Value dmissadd

```
-1 = '-1 Inapplicable'  
1 = '1 no flags and added at CL section'  
2 = '2 no flags and added at DT section'  
3 = '3 no flags and added at EW section'  
4 = '4 no flags and added at HA section'  
5 = '5 no flags and added at HO section'  
6 = '6 no flags and added at MC section'  
7 = '7 no flags and added at MO section'  
8 = '8 no flags and added at PA section'  
9 = '9 no flags and added at PE section'  
10 = '10 no flags and added at SC section'  
11 = '11 no flags and added at SN section';
```

Value d2mssadd

```
-1 = '-1 Inapplicable'  
0 = '0 no flags and added at undetermined section'  
1 = '1 no flags and added at CL section'  
2 = '2 no flags and added at DT section'  
3 = '3 no flags and added at EW section'  
4 = '4 no flags and added at HA section'  
5 = '5 no flags and added at HO section'  
6 = '6 no flags and added at MC section'  
7 = '7 no flags and added at MO section'  
8 = '8 no flags and added at PA section'  
9 = '9 no flags and added at PE section'  
10 = '10 no flags and added at SC section'  
11 = '11 no flags and added at SN section'  
12 = '12 no flags and added at CS section'  
13 = '13 no flags and added at HH section'
```

## SAS ALGORITHM FOR DEMENTIA

```
14='14 no flags and added at IS section';
```

```
Value dopage3c
```

```
-9='-9 Missing'  
-8='-8 RF'  
-7='-7 DK'  
-1='-1 Inapplicable'  
1='1 UNDER 30'  
2='2 30-39'  
3='3 40-49'  
4='4 50-59'  
5='5 60-69'  
6='6 70-79'  
7='7 80-89'  
8='8 90 +';
```

```
Value dopagect
```

```
-9='-9 Missing'  
-8='-8 DK'  
-7='-7 RF'  
-1='-1 Inapplicable'  
1='1 UNDER 20'  
2='2 20-24'  
3='3 25-29'  
4='4 30-34'  
5='5 35-39'  
6='6 40-44'  
7='7 45-49'  
8='8 50-54'  
9='9 55-59'  
10='10 60-64'  
11='11 65-69'  
12='12 70-74'  
13='13 75-79'  
14='14 80-84'  
15='15 85-89'  
16='16 90 +';
```

```
VALUE W200008W
```

```
-7 = '-7 RF'  
-8 = '-8 DK'  
-1 = '-1 Inapplicable'  
-9 = '-9 Missing'  
1 = "1 UNDER 20"  
2 = "2 20-24"  
3 = "3 25-29"  
4 = "4 30-34"  
5 = "5 35-39"  
6 = "6 40-44"  
7 = "7 45-49"  
8 = "8 50-54"  
9 = "9 55-59"  
10 = "10 60-65"  
11 = "11 66-69"  
12 = "12 70-74"  
13 = "13 75-79"
```

## SAS ALGORITHM FOR DEMENTIA

```
14 = "14 80-85"  
15 = "15 86-89"  
16 = "16 90-94"  
17 = "17 95-99"  
18 = "18 100 +"  
;  
VALUE NumCigs  
-7 = '-7 RF'  
-8 = '-8 DK'  
-1 = '-1 Inapplicable'  
-9 = '-9 Missing'  
999 = '999 SP smokes less than 1 cigarette / day';  
  
VALUE dlmlint  
1 = '1 Last month of life interview'  
-1 = '-1 Inapplicable' ;  
  
VALUE d2intvra  
1 = '1 65 to 69'  
2 = '2 70 to 74'  
3 = '3 75 to 79'  
4 = '4 80 to 84'  
5 = '5 85 to 89'  
6 = '6 90+'  
-7 = '-7 RF'  
-8 = '-8 DK'  
-1 = '-1 Inapplicable'  
-9 = '-9 Missing' ;  
  
VALUE dad8dem  
1 = '1 DEMENTIA RESPONSE TO ANY AD8 ITEMS IN PRIOR ROUNDS'  
-1 = '-1 Inapplicable' ;  
  
VALUE dwrdirre  
1 = '1 No words remembered'  
-1 = '-1 Inapplicable'  
-9 = '-9 Missing' ;  
  
VALUE dwrdirre  
1 = '1 Refused word recall task'  
-1 = '-1 Inapplicable'  
-9 = '-9 Missing' ;  
  
VALUE A0001AB  
1 = "1 AM"  
2 = "2 PM"  
-1 = '-1 Inapplicable'  
-9 = '-9 Missing';  
  
VALUE A0002WA  
1 = "1 Yes, there is space to set up the walking course"  
2 = "2 No, there is not space to set up the walking course"  
-1 = '-1 Inapplicable'  
-9 = '-9 Missing';  
  
VALUE A0004WA
```

## SAS ALGORITHM FOR DEMENTIA

```
1 = "1 None"  
2 = "2 Cane"  
3 = "3 Walker or rollator"  
9 = "9 Other, specify"  
-1 = '-1 Inapplicable'  
-7 = '-7 RF'  
-8 = '-8 DK'  
-9 = '-9 Missing';
```

```
VALUE A0004CH  
1 = "1 No, chair stand not completed"  
2 = "2 Yes, chair stand completed"  
-1 = '-1 Inapplicable'  
-9 = '-9 Missing';
```

```
VALUE A0008CH  
1 = "1 With arms"  
2 = "2 Without arms"  
-1 = '-1 Inapplicable'  
-9 = '-9 Missing';
```

```
VALUE A0014CH  
1 = "1 1 Chair stand completed"  
2 = "2 2 Chair stands completed"  
3 = "3 3 Chair stands completed"  
4 = "4 4 Chair stands completed"  
-1 = '-1 Inapplicable'  
-9 = '-9 Missing';
```

```
VALUE BA1SS  
1 = '1 Eligible and recorded result for SxS Balance'  
2 = '2 Eligible and no recorded result for SxS Balance'  
4 = '4 Not Eligible due to exclusion criteria'  
-1 = '-1 Inapplicable'  
-9 = '-9 Missing';
```

```
VALUE BA1STAN  
1 = '1 Eligible and recorded result for Semi Tandem Balance'  
2 = '2 Eligible and no recorded result for Semi Tandem Balance'  
3 = '3 Not administered because did not complete prior balance test'  
4 = '4 Not Eligible due to exclusion criteria'  
-1 = '-1 Inapplicable'  
-9 = '-9 Missing';
```

```
VALUE BA1TAN  
1 = '1 Eligible and recorded result for full tandem balance'  
2 = '2 Eligible and no recorded result for full tandem balance'  
3 = '3 Not administered because did not complete prior balance tests'  
4 = '4 Not Eligible due to exclusion criteria'  
-1 = '-1 Inapplicable'  
-9 = '-9 Missing';
```

```
VALUE BA1OP  
1 = '1 Eligible and recorded result for one leg eyes open balance'  
2 = '2 Eligible and no recorded result for one leg eyes open balance'  
3 = '3 Not administered because did not complete prior balance tests'  
4 = '4 Not Eligible due to exclusion criteria'
```

## SAS ALGORITHM FOR DEMENTIA

```
-1 = '-1 Inapplicable'  
-9 = '-9 Missing';
```

### VALUE BA1CL

```
1 = '1 Eligible and recorded result for one leg eyes closed balance'  
2 = '2 Eligible and no recorded result for one leg eyes closed balance'  
3 = '3 Not administered because did not complete prior balance tests'  
4 = '4 Not Eligible due to exclusion criteria'  
-1 = '-1 Inapplicable'  
-9 = '-9 Missing';
```

### VALUE WA1WLK

```
1 = '1 Eligible and recorded result for walking course'  
2 = '2 Eligible and no recorded result for walking course'  
4 = '4 Not Eligible due to exclusion criteria'  
5 = '5 Not Eligible on exclusion criteria but recorded result (SP changed  
mind)'  
-1 = '-1 Inapplicable '  
-9 = '-9 Missing';
```

### VALUE CH1SCH

```
1 = '1 Eligible and recorded result for single chair stand'  
2 = '2 Eligible and no recorded result for single chair stand'  
4 = '4 Not Eligible due to exclusion criteria'  
-1 = '-1 Inapplicable'  
-9 = '-9 Missing';
```

### VALUE CH1RSH

```
1 = '1 Eligible and recorded result for repeated chair stand'  
2 = '2 Eligible and no recorded result for repeated chair stand'  
3 = '3 Not administered because did not complete single chair stand w/o  
arms'  
4 = '4 Not Eligible due to exclusion criteria'  
-1 = '-1 Inapplicable'  
-9 = '-9 Missing';
```

### VALUE GR1GRIP

```
1 = '1 Eligible and recorded result for grip strength'  
2 = '2 Eligible and no recorded result for grip strength'  
4 = '4 Not Eligible due to exclusion criteria'  
-1 = '-1 Inapplicable'  
-9 = '-9 Missing';
```

### VALUE WC1WAIST

```
1 = '1 Eligible and recorded result for waist circumference'  
2 = '2 Eligible and no recorded result for waist circumference'  
-1 = '-1 Inapplicable'  
-9 = '-9 Missing';
```

### VALUE PK1PEAK

```
1 = '1 Eligible and recorded result for peak air flow'  
2 = '2 Eligible and no recorded result for peak air flow'  
-1 = '-1 Inapplicable'  
-9 = '-9 Missing';
```

### VALUE RGT\_LFT

```
1 = '1 Right'
```

## SAS ALGORITHM FOR DEMENTIA

```
2 = '2 Left'  
-1 = '-1 Inapplicable'  
-9 = '-9 Missing';
```

```
VALUE PERSON  
1 = '1 Interviewer'  
2 = '2 Sample person'  
-1 = '-1 Inapplicable'  
-9 = '-9 Missing';
```

```
VALUE STAND  
1 = '1 Standing'  
2 = '2 Sitting'  
3 = '3 Lying down'  
-1 = '-1 Inapplicable'  
-9 = '-9 Missing';
```

```
VALUE EFFORT  
1 = '1 Full effort'  
2 = '2 Less effort for health reason'  
3 = '3 Less effort for other reason'  
-1 = '-1 Inapplicable'  
-9 = '-9 Missing';
```

```
VALUE WORDREC  
1 = ' 1 LIST 1'  
2 = ' 2 LIST 2'  
3 = ' 3 LIST 3'  
-1 = '-1 Inapplicable '  
-9 = '-9 Missing';
```

```
VALUE WORDRE_N  
-1 = '-1 Inapplicable'  
-2 = '-2 Proxy says cannot ask SP'  
-3 = '-3 Proxy says can ask SP but SP unable to answer'  
-7 = '-7 SP refused activity'  
-9 = '-9 Missing';
```

```
VALUE SP30051W  
-7 = '-7 RF'  
-8 = '-8 DK'  
-1 = '-1 Inapplicable'  
-9 = '-9 Missing'  
1 = "1 EXCELLENT"  
2 = "2 VERY GOOD"  
3 = "3 GOOD"  
4 = "4 FAIR"  
5 = "5 POOR"  
6 = "6 DOES NOT APPLY/NO CARE IN LAST MONTH OF LIFE"
```

```
;
```

```
VALUE SP3019aW  
-7 = '-7 RF'  
-8 = '-8 DK'  
-1 = '-1 Inapplicable'  
-9 = '-9 Missing'  
1 = "1 JANUARY"  
2 = "2 FEBRUARY"  
3 = "3 MARCH"
```

## SAS ALGORITHM FOR DEMENTIA

```
4 = "4 APRIL"
5 = "5 MAY"
6 = "6 JUNE"
7 = "7 JULY"
8 = "8 AUGUST"
9 = "9 SEPTEMBER"
10 = "10 OCTOBER"
11 = "11 NOVEMBER"
12 = "12 DECEMBER"
90 = "90 LAST INTERVIEW INFORMATION INCORRECT"
;
VALUE RACEHISP
  1 = ' 1 White, non-hispanic'
  2 = ' 2 Black, non-hispanic'
  3 = ' 3 Other (Am Indian/Asian/Native Hawaiian/Pacific Islander/other
specify), non-Hispanic'
  4 = ' 4 Hispanic'
  5 = ' 5 More than one DKRF primary'
  6 = ' 6 DKRF'
  -9 = '-9 Missing';

VALUE SPPB_MIS
  -7 = '-7 RF'
-8 = '-8 DK'
-9 = '-9 Missing'
-1="-1 Inapplicable"
1="1 Proxy interview"
2="2 Missing walk and repeat chair and balance"
3="3 Missing walk and repeat chair"
4="4 Missing walk and balance"
5="5 Missing repeat chair and balance"
6="6 Missing walk"
7="7 Missing repeat chair"
8="8 Missing balance"
9="9 No space"
10="10 No chair"
11="11 No space walk and no chair"
12="12 No space walk and non-safety missing"
13="13 No chair and non-safety missing"
14="14 Non-safety walk"
15="15 Non-safety chair"
16="16 Non-safety balance"
17="17 Non-safety walk and chair"
18="18 Non-safety walk and balance"
19="19 Non-safety chair and balance"
20="20 Non-safety walk and chair and balance";

VALUE QUARTILES
-9="-9 Missing"
-1="-1 Inapplicable"
;
VALUE SP30025W
  -7 = '-7 RF'
  -8 = '-8 DK'
  -1 = '-1 Inapplicable'
  -9 = '-9 Missing'
  1 = "1 FREE-STANDING (DETACHED) SINGLE HOUSE"
```



## SAS ALGORITHM FOR DEMENTIA

```
    2 = "2 SINGLE HOUSE BUT ATTACHED TO OTHERS (ROW HOUSE, TOWNHOUSE, DUPLEX,  
TRIPLEX, OR TRIPLE DECKER)"  
    3 = "3 MOBILE HOME OR TRAILER"  
    4 = "4 MULTI-UNIT (2+) BUILDING"  
    91 = "91 OTHER (SPECIFY)"  
;  
    VALUE SP30046W  
        -7 = '-7 RF'  
    -8 = '-8 DK'  
    -1 = '-1 Inapplicable'  
    -9 = '-9 Missing'  
    1 = "1 AT SP'S HOME"  
    2 = "2 IN A HOSPITAL"  
    3 = "3 IN A NURSING HOME"  
    4 = "4 IN A HOSPICE RESIDENCE"  
    5 = "5 AT SOMEONE ELSE'S HOME"  
    91 = "91 SOMEWHERE ELSE (SPECIFY)"  
;  
    VALUE SP30076W  
        -7 = '-7 RF'  
    -8 = '-8 DK'  
    -1 = '-1 Inapplicable'  
    -9 = '-9 Missing'  
    1 = "1 YES"  
    2 = "2 NO"  
    7 = "7 YES, DOESNT KNOW HOW TO USE"  
;  
    VALUE W300151W  
        -7 = '-7 RF'  
        -8 = '-8 DK'  
        -1 = '-1 Inapplicable'  
        -9 = '-9 Missing'  
    1 = "1 VERY GOOD"  
    2 = "2 GOOD"  
    3 = "3 FAIR"  
    4 = "4 POOR"  
    5 = "5 VERY POOR" ;  
  
    VALUE SP30076H  
        -7 = '-7 RF'  
        -8 = '-8 DK'  
        -1 = '-1 Inapplicable'  
        -9 = '-9 Missing'  
    95 = "95 NO USUAL NUMBER OF HOURS OR DIFFERENT FROM DAY TO DAY" ;  
    VALUE SP30076G  
        -7 = '-7 RF'  
        -8 = '-8 DK'  
        -1 = '-1 Inapplicable'  
        -9 = '-9 Missing'  
    95 = "95 NO USUAL TIME OR DIFFERENT FROM DAY TO DAY" ;  
    VALUE SP30076I  
        -7 = '-7 RF'  
        -8 = '-8 DK'  
        -1 = '-1 Inapplicable'  
        -9 = '-9 Missing'  
    95 = "95 NO USUAL NUMBER OF HOURS OR DIFFERENT FROM NIGHT TO NIGHT"  
;  
;
```

## SAS ALGORITHM FOR DEMENTIA

```

        VALUE SP30076J
          -7 = '-7 RF'
          -8 = '-8 DK'
          -1 = '-1 Inapplicable'
          -9 = '-9 Missing'
    95 = "95 NO USUAL TIME OR DIFFERENT FROM NIGHT TO NIGHT" ;
        VALUE SP30076K
          -7 = '-7 RF'
          -8 = '-8 DK'
          -1 = '-1 Inapplicable'
          -9 = '-9 Missing'
           0 = "0 LESS THAN AN HOUR"
    90 = "90 FELL ASLEEP RIGHT AWAY"
    95 = "95 NO USUAL AMOUNT OF TIME TO FALL ASLEEP OR DIFFERENT FROM
NIGHT TO NIGHT" ;
        VALUE SP30155W
          -7 = '-7 RF'
          -8 = '-8 DK'
          -1 = '-1 Inapplicable'
          -9 = '-9 Missing'
           1 = "1 NAPS PLANNED"
           2 = "2 FELL ASLEEP WITHOUT MEANING TO"
           3 = "3 BOTH (SOME PLANNED/SOME NOT)" ;
    VALUE SP30120W
      -7 = '-7 RF'
      -8 = '-8 DK'
      -1 = '-1 Inapplicable'
      -9 = '-9 Missing'
       1 = "1 OFTEN"
       2 = "2 SOMETIMES"
       3 = "3 RARELY"
       4 = "4 NEVER" ;
Value HOURSF
-13='-13 SP deceased/section not administered'
-12='-12 Valid skip/staff'
-11='-11 Hours missing'
-10='-10 Days missing'
 -9='-9 Days and hrs missing'
 -1='-1 Inapplicable'
0- 1='0-<1'
 1.01- 10='1-<10'
10.01- 20='10-<20'
20.01- 30='20-<30'
30.01-40='30-<40'
40.01-60='40-<60'
60.01-120='60-<120'
120.01-180='120-<180'
180.01-744='180-744 (24/7)'
9999='9999 Not codeable, <1 hour/day';
    VALUE SP30120W
      -7 = '-7 RF'
      -8 = '-8 DK'
      -1 = '-1 Inapplicable'
      -9 = '-9 Missing'
       1 = "1 OFTEN"
       2 = "2 SOMETIMES"
       3 = "3 RARELY"

```

## SAS ALGORITHM FOR DEMENTIA

```
    4 = "4 NEVER"  
;  
VALUE SP30118W  
-7 = '-7 RF'  
-8 = '-8 DK'  
-1 = '-1 Inapplicable'  
-9 = '-9 Missing'  
 1 = "1 A LOT"  
 2 = "2 SOME"  
 3 = "3 A LITTLE"  
 4 = "4 NOT AT ALL" ;  
VALUE SP30141W  
-7 = '-7 RF'  
-8 = '-8 DK'  
-1 = '-1 Inapplicable'  
-9 = '-9 Missing'  
 1 = "less than $27,600,"  
 2 = "$27,600-$41,999,"  
 3 = "$42,000-$63,999,"  
 4 = "$64,000-$107,999, or"  
 5 = "$108,000 or more?" ;  
VALUE SP30142W  
-7 = '-7 RF'  
-8 = '-8 DK'  
-1 = '-1 Inapplicable'  
-9 = '-9 Missing'  
 1 = "less than $14,000,"  
 2 = "$14,000-$21,999,"  
 3 = "$22,000-$35,999,"  
 4 = "$36,000-$48,999, or"  
 5 = "$49,000 or more?" ;  
VALUE INVENT  
-7 = '-7 RF'  
-8 = '-8 DK'  
-1 = '-1 Inapplicable'  
-9 = '-9 Missing'  
 104="104-Arthritis"  
 107="107-Lung Disease"  
 109="109-Dementia or Alzheimer's disease"  
 110="110-Cancer"  
 113="113-Other serious disease, illness, health problem"  
 114="114-Knee surgery/problem"  
 115="115-Hip repair or replacement/problem"  
 117="117-Back or Spine Surgery/problem"  
 121="121-Sleep Problems"  
 201="201-Hearing problems"  
 202="202-Sight problems"  
 205="205-Pain"  
 301="301-Breathing problems"  
 302="302-Upper body strength movement"  
 303="303-Lower body strength movement"  
 304="304-Low energy"  
 305="305-Balance or coordination problems"  
 306="306-Walking distances"  
 307="307-Climbing stairs"  
 308="308-Lifting and carrying items"  
 309="309-Kneeling"
```

## SAS ALGORITHM FOR DEMENTIA

```
310="310-Bending"
311="311-Reaching"
312="312-Opening Jars"
313="313-Grasping"
401="401-Memory"
501="501-Getting out of bed"
502="502-Getting around inside"
503="503-Getting outside"
504="504-Travel/transportation"
601="601-Eating"
602="602-Washing"
603="603-Toileting"
604="604-Dressing"
605="605-Grooming"
701="701-Laundry"
702="702-Shopping"
703="703-Cooking"
705="705-Money matters"
706="706-Indoor cleaning and maintenance"
707="707-Outdoor cleaning and maintenance"
801="801-Medications"
802="802-Doctor visits"
804="804-Other medical self-care"
1211="1211-Working"
1442="1442-Walking/exercising pets"
1451="1451-Vehicle repair and maintenance"
1461="1461-Appliance tool, and toy use, set-up, repair, &
maintenance"
1462="1462-Computer use, set-up, repair, maintenance, and
education"
1473="1473-Household organization"
1512="1512-Looking after someone else"
1611="1611-Socializing and communicating with others-in person"
1612="1612-Socializing and communication with others by talking
on telephone"
1613="1613-Attending or hosting party, wedding or social
occasions"
1614="1614-Reading and sorting through the mail"
1621="1621-Watch television and movies"
1631="1631-Games & puzzles"
1641="1641-Arts and crafts, collecting, and hobbies, making
music"
1642="1642-Reading"
1643="1642-Writing (personal, not on computer)"
1644="1644-Listening to recorded music or radio"
1711="1711-Playing/practicing sports or taking physical activity
class/lessons"
1712="1712-Walking/jogging for exercise or pleasure or working
out"
1713="1713-Other outdoor recreation activities"
1813="1813-Religious & spiritual volunteer activities"
1901="1901-Other, no existing code"
1998="1998-Don't know"
1999="1999-Refused/blank";
VALUE W500058W
  -7 = '-7 RF'
  -8 = '-8 DK'
```

## SAS ALGORITHM FOR DEMENTIA

```
-1 = '-1 Inapplicable'
-9 = '-9 Missing'
 1 = "1 MONTHS"
 2 = "2 YEARS" ;
VALUE W500103W
-7 = '-7 RF'
-8 = '-8 DK'
-1 = '-1 Inapplicable'
-9 = '-9 Missing'
 1 = "1 YES, A YEAR OR MORE"
 2 = "2 NO, LESS THAN A YEAR" ;
VALUE W500105W
-7 = '-7 RF'
-8 = '-8 DK'
-1 = '-1 Inapplicable'
-9 = '-9 Missing'
 1 = "1 MONTH AND YEAR"
 2 = "2 NUMBER OF MONTHS AGO"
 3 = "3 NUMBER OF YEARS AGO"
 4 = "4 AGE WHEN LAST DROVE"
 7 = "7 NEVER DROVE" ;
VALUE W500123W
-7 = '-7 RF'
-8 = '-8 DK'
-1 = '-1 Inapplicable'
-9 = '-9 Missing'
 1 = "1 STILL FAVORITE ACTIVITY"
 2 = "2 HAS A NEW FAVORITE ACTIVITY"
 95 = "95 NO FAVORITE ACTIVITY" ;
VALUE W500124W
-7 = '-7 RF'
-8 = '-8 DK'
-1 = '-1 Inapplicable'
-9 = '-9 Missing'
 1 = "1 LESS THAN 1 MONTH"
 2 = "2 1 TO 3 MONTHS"
 3 = "3 4 TO 5 MONTHS"
 4 = "4 6 OR MORE MONTHS" ;
VALUE W500125W
-7 = '-7 RF'
-8 = '-8 DK'
-1 = '-1 Inapplicable'
-9 = '-9 Missing'
 1 = "1 LESS THAN 1 WEEK"
 2 = "2 1 TO 2 WEEKS"
 3 = "3 3 TO 4 WEEKS" ;
VALUE W500126W
-7 = '-7 RF'
-8 = '-8 DK'
-1 = '-1 Inapplicable'
-9 = '-9 Missing'
 1 = "1 A FRACTURE, SPRAIN, OR INJURY"
 2 = "2 A HIP, KNEE, OR OTHER JOINT REPLACEMENT"
 3 = "3 ANOTHER MUSCULOSKELETAL CONDITION"
 4 = "4 A STROKE OR TIA"
 5 = "5 A HEART ATTACK"
 6 = "6 ANOTHER HEART CONDITION OR VASCULAR DISEASE"
```

## SAS ALGORITHM FOR DEMENTIA

```
7 = "7 A BREATHING CONDITION"
8 = "8 A NEUROLOGICAL CONDITION LIKE MS OR PARKINSONS"
9 = "9 CANCER"
94 = "94 ANOTHER CONDITION (SPECIFY)"
95 = "95 NO MEDICAL CONDITION (IF VOLUNTEERED)" ;
VALUE W500128W
-7 = '-7 RF'
-8 = '-8 DK'
-1 = '-1 Inapplicable'
-9 = '-9 Missing'
1 = "1 DIFFICULTY CHEWING OR SWALLOWING"
2 = "2 DIFFICULTY SPEAKING OR BEING UNDERSTOOD"
3 = "3 PAIN LEVEL"
4 = "4 PROBLEM WITH BREATHING"
5 = "5 PROBLEM WITH STRENGTH (MUSCLE WEAKNESS)"
6 = "6 PROBLEM WITH MOVEMENT (RANGE OF MOTION)"
7 = "7 LOW ENERGY LEVEL"
8 = "8 PROBLEM WITH BALANCE OR COORDINATION"
9 = "9 PROBLEM WITH FALLS"
10 = "10 PROBLEM WITH MEMORY"
95 = "95 NONE OF THESE PROBLEMS" ;
VALUE W500131W
-7 = '-7 RF'
-8 = '-8 DK'
-1 = '-1 Inapplicable'
-9 = '-9 Missing'
1 = "1 AS AN OVERNIGHT PATIENT IN A HOSPITAL, NURSING HOME OR REHAD
FACILITY"
2 = "2 AT AN OUTPATIENT CENTER, CLINIC, DRs OR THERAPISTs OFFICE"
3 = "3 HOME"
4 = "4 SOMEWHERE ELSE" ;
VALUE W500132W
-7 = '-7 RF'
-8 = '-8 DK'
-1 = '-1 Inapplicable'
-9 = '-9 Missing'
1 = "1 IMPROVED"
2 = "2 GOT WORSE"
3 = "3 STAYED ABOUT THE SAME"
4 = "4 VARIED/UP AND DOWN (IF VOLUNTEERED)" ;
VALUE W500133W
-7 = '-7 RF'
-8 = '-8 DK'
-1 = '-1 Inapplicable'
-9 = '-9 Missing'
1 = "1 A LOT"
2 = "2 SOMEWHAT"
3 = "3 A LITTLE" ;
VALUE W500137W
-7 = '-7 RF'
-8 = '-8 DK'
-1 = '-1 Inapplicable'
-9 = '-9 Missing'
1 = "1 WELL OFF"
2 = "2 ABOVE AVERAGE"
3 = "3 AVERAGE"
```

## SAS ALGORITHM FOR DEMENTIA

```
    4 = "4 BELOW AVERAGE"  
    5 = "5 POOR" ;  
VALUE W500010W  
-7 = '-7 RF'  
-8 = '-8 DK'  
-1 = '-1 Inapplicable'  
-9 = '-9 Missing'  
    1 = "1 MOTHER ONLY"  
    2 = "2 FATHER ONLY"  
    3 = "3 ANOTHER RELATIVE"  
    4 = "4 NON-RELATIVES"  
    5 = "5 VARIED/MOVED AROUND" ;  
VALUE W500142W  
-7 = '-7 RF'  
-8 = '-8 DK'  
-1 = '-1 Inapplicable'  
-9 = '-9 Missing'  
    1 = "1 VERY WELL"  
    2 = "2 WELL"  
    3 = "3 NOT WELL"  
    4 = "4 NOT AT ALL" ;  
VALUE W500147W  
-7 = '-7 RF'  
-8 = '-8 DK'  
-1 = '-1 Inapplicable'  
-9 = '-9 Missing'  
    1 = "1 NUMBER OF YEARS"  
    2 = "2 AGE" ;  
VALUE W500150W  
-7 = '-7 RF'  
-8 = '-8 DK'  
-1 = '-1 Inapplicable'  
-9 = '-9 Missing'  
    1 = "1 ENTER PAYCHECK AMOUNT"  
    2 = "2 ENTER PAY PER HOUR"  
    3 = "3 ENTER PAY PER DAY" ;  
VALUE W500151W  
-7 = '-7 RF'  
-8 = '-8 DK'  
-1 = '-1 Inapplicable'  
-9 = '-9 Missing'  
    1 = "1 ENTER OCCUPATION"  
    2 = "2 NEVER WORKED ENTIRE LIFE"  
    3 = "3 HOMEMAKER/RAISED CHILDREN/WORKED IN THE HOME" ;  
VALUE W500152W  
-7 = '-7 RF'  
-8 = '-8 DK'  
-1 = '-1 Inapplicable'  
-9 = '-9 Missing'  
    1 = "1 SAME KIND OF WORK"  
    2 = "2 SOMETHING DIFFERENT" ;  
VALUE W500160W  
-7 = '-7 RF'  
-8 = '-8 DK'  
-1 = '-1 Inapplicable'  
-9 = '-9 Missing'  
    1 = "1 MAIL"
```

## SAS ALGORITHM FOR DEMENTIA

```
    2 = "2 DIRECT DEPOSIT"  
    3 = "3 PREPAID CARD" ;  
VALUE W500165W  
-7 = '-7 RF'  
-8 = '-8 DK'  
-1 = '-1 Inapplicable'  
-9 = '-9 Missing'  
    1 = "1 ENTER COMBINED AMOUNT"  
    2 = "2 ENTER SP AND SPOUSE/PARTNER AMOUNTS SEPARATELY" ;  
VALUE W500166W  
-7 = '-7 RF'  
-8 = '-8 DK'  
-1 = '-1 Inapplicable'  
-9 = '-9 Missing'  
    1 = "1 LESS THAN $1,300"  
    2 = "2 $1,300 TO LESS THAN $1,700"  
    3 = "3 $1,700 TO LESS THAN $2,200"  
    4 = "4 $2,200 TO LESS THAN $2,600"  
    5 = "5 $2,600 OR MORE" ;  
VALUE W500167W  
-7 = '-7 RF'  
-8 = '-8 DK'  
-1 = '-1 Inapplicable'  
-9 = '-9 Missing'  
    1 = "1 LESS THAN $700"  
    2 = "2 $700 TO LESS THAN $1,000"  
    3 = "3 $1,000 TO LESS THAN $1,300"  
    4 = "4 $1,300 TO LESS THAN $1,600"  
    5 = "5 $1,600 OR MORE" ;  
VALUE W500168W  
-7 = '-7 RF'  
-8 = '-8 DK'  
-1 = '-1 Inapplicable'  
-9 = '-9 Missing'  
    1 = "1 LESS THAN $300"  
    2 = "2 $300 TO LESS THAN $700"  
    3 = "3 $700 TO LESS THAN $1,000"  
    4 = "4 $1,000 OR MORE" ;  
VALUE W500169W  
-7 = '-7 RF'  
-8 = '-8 DK'  
-1 = '-1 Inapplicable'  
-9 = '-9 Missing'  
    1 = "1 LESS THAN $100"  
    2 = "2 $100 TO LESS THAN $200"  
    3 = "3 $200 TO LESS THAN $400"  
    4 = "4 $400 TO LESS THAN $700"  
    5 = "5 $700 OR MORE" ;  
VALUE W500170W  
-7 = '-7 RF'  
-8 = '-8 DK'  
-1 = '-1 Inapplicable'  
-9 = '-9 Missing'  
    1 = "1 LESS THAN $1,000"  
    2 = "2 $1,000 TO LESS THAN $1,400"  
    3 = "3 $1,400 TO LESS THAN $1,800"  
    4 = "4 $1,800 TO LESS THAN $2,200"
```



## SAS ALGORITHM FOR DEMENTIA

```
    5 = "5 $2,200 OR MORE" ;
VALUE W500171W
-7 = '-7 RF'
-8 = '-8 DK'
-1 = '-1 Inapplicable'
-9 = '-9 Missing'
  1 = "1 LESS THAN $500"
  2 = "2 $500 TO LESS THAN $700"
  3 = "3 $700 TO LESS THAN $900"
  4 = "4 $900 TO LESS THAN $1,100"
  5 = "5 $1,100 OR MORE" ;
VALUE W500172W
-7 = '-7 RF'
-8 = '-8 DK'
-1 = '-1 Inapplicable'
-9 = '-9 Missing'
  1 = "1 LESS THAN $600"
  2 = "2 $600 TO LESS THAN $1,300"
  3 = "3 $1,300 TO LESS THAN $2,100"
  4 = "4 $2,100 TO LESS THAN $5,900"
  5 = "5 $5,900 OR MORE" ;
VALUE W500173W
-7 = '-7 RF'
-8 = '-8 DK'
-1 = '-1 Inapplicable'
-9 = '-9 Missing'
  1 = "1 LESS THAN $400"
  2 = "2 $400 TO LESS THAN $900"
  3 = "3 $900 TO LESS THAN $1,600"
  4 = "4 $1,600 TO LESS THAN $3,800"
  5 = "5 $3,800 OR MORE" ;
VALUE W500174W
-7 = '-7 RF'
-8 = '-8 DK'
-1 = '-1 Inapplicable'
-9 = '-9 Missing'
  1 = "1 LESS THAN $34,000"
  2 = "2 $34,000 TO LESS THAN $82,000"
  3 = "3 $82,000 TO LESS THAN $175,000"
  4 = "4 $175,000 TO LESS THAN $413,000"
  5 = "5 $413,000 OR MORE" ;
VALUE W500175W
-7 = '-7 RF'
-8 = '-8 DK'
-1 = '-1 Inapplicable'
-9 = '-9 Missing'
  1 = "1 LESS THAN $20,000"
  2 = "2 $20,000 TO LESS THAN $47,000"
  3 = "3 $47,000 TO LESS THAN $92,000"
  4 = "4 $92,000 TO LESS THAN $218,000"
  5 = "5 $218,000 OR MORE" ;
VALUE W500176W
-7 = '-7 RF'
-8 = '-8 DK'
-1 = '-1 Inapplicable'
-9 = '-9 Missing'
  1 = "1 LESS THAN $200"
```

## SAS ALGORITHM FOR DEMENTIA

```
2 = "2 $200 TO LESS THAN $500"  
3 = "3 $500 TO LESS THAN $1,000"  
4 = "4 $1,000 TO LESS THAN $2,500"  
5 = "5 $2,500 OR MORE" ;  
VALUE W500177W  
-7 = '-7 RF'  
-8 = '-8 DK'  
-1 = '-1 Inapplicable'  
-9 = '-9 Missing'  
1 = "1 LESS THAN $100"  
2 = "2 $100 TO LESS THAN $300"  
3 = "3 $300 TO LESS THAN $700"  
4 = "4 $700 TO LESS THAN $1,700"  
5 = "5 $1,700 OR MORE" ;  
VALUE W500178W  
-7 = '-7 RF'  
-8 = '-8 DK'  
-1 = '-1 Inapplicable'  
-9 = '-9 Missing'  
1 = "1 LESS THAN $2,400"  
2 = "2 $2,400 TO LESS THAN $6,000"  
3 = "3 $6,000 TO LESS THAN $12,000"  
4 = "4 $12,000 TO LESS THAN $30,000"  
5 = "5 $30,000 OR MORE" ;  
VALUE W500179W  
-7 = '-7 RF'  
-8 = '-8 DK'  
-1 = '-1 Inapplicable'  
-9 = '-9 Missing'  
1 = "1 LESS THAN $1,200"  
2 = "2 $1,200 TO LESS THAN $3,600"  
3 = "3 $3,600 TO LESS THAN $8,400"  
4 = "4 $8,400 TO LESS THAN $20,400"  
5 = "5 $20,400 OR MORE" ;  
VALUE W500180W  
-7 = '-7 RF'  
-8 = '-8 DK'  
-1 = '-1 Inapplicable'  
-9 = '-9 Missing'  
1 = "1 LESS THAN $9,000"  
2 = "2 $9,000 TO LESS THAN $18,000"  
3 = "3 $18,000 TO LESS THAN $93,000"  
4 = "4 $93,000 TO LESS THAN $350,000"  
5 = "5 $350,000 OR MORE" ;  
VALUE W500181W  
-7 = '-7 RF'  
-8 = '-8 DK'  
-1 = '-1 Inapplicable'  
-9 = '-9 Missing'  
1 = "1 LESS THAN $600"  
2 = "2 $600 TO LESS THAN $5,000"  
3 = "3 $5,000 TO LESS THAN $16,000"  
4 = "4 $16,000 TO LESS THAN $62,000"  
5 = "5 $62,000 OR MORE" ;  
VALUE W500182W  
-7 = '-7 RF'  
-8 = '-8 DK'
```

## SAS ALGORITHM FOR DEMENTIA

```
-1 = '-1 Inapplicable'  
-9 = '-9 Missing'  
1 = "1 LESS THAN $8,000"  
2 = "2 $8,000 TO LESS THAN $62,000"  
3 = "3 $62,000 TO LESS THAN $192,000"  
4 = "4 $192,000 TO LESS THAN $213,000"  
5 = "5 $213,000 OR MORE" ;  
VALUE W500183W  
-7 = '-7 RF'  
-8 = '-8 DK'  
-1 = '-1 Inapplicable'  
-9 = '-9 Missing'  
1 = "1 LESS THAN $300"  
2 = "2 $300 TO LESS THAN $2,500"  
3 = "3 $2,500 TO LESS THAN $8,000"  
4 = "4 $8,000 TO LESS THAN $37,000"  
5 = "5 $37,000 OR MORE" ;  
VALUE W500184W  
-7 = '-7 RF'  
-8 = '-8 DK'  
-1 = '-1 Inapplicable'  
-9 = '-9 Missing'  
1 = "1 LESS THAN $11,000"  
2 = "2 $11,000 TO LESS THAN $25,000"  
3 = "3 $25,000 TO LESS THAN $50,000"  
4 = "4 $50,000 TO LESS THAN $108,000"  
5 = "5 $108,000 OR MORE" ;  
VALUE W500185W  
-7 = '-7 RF'  
-8 = '-8 DK'  
-1 = '-1 Inapplicable'  
-9 = '-9 Missing'  
1 = "1 LESS THAN $2,000"  
2 = "2 $2,000 TO LESS THAN $7,000"  
3 = "3 $7,000 TO LESS THAN $17,000"  
4 = "4 $17,000 TO LESS THAN $57,000"  
5 = "5 $57,000 OR MORE" ;  
VALUE W500186W  
-7 = '-7 RF'  
-8 = '-8 DK'  
-1 = '-1 Inapplicable'  
-9 = '-9 Missing'  
1 = "1 LESS THAN $8,000"  
2 = "2 $8,000 TO LESS THAN $13,000"  
3 = "3 $13,000 TO LESS THAN $28,000"  
4 = "4 $28,000 TO LESS THAN $54,000"  
5 = "5 $54,000 OR MORE" ;  
VALUE W500187W  
-7 = '-7 RF'  
-8 = '-8 DK'  
-1 = '-1 Inapplicable'  
-9 = '-9 Missing'  
1 = "1 LESS THAN $500"  
2 = "2 $500 TO LESS THAN $1,900"  
3 = "3 $1,900 TO LESS THAN $5,000"  
4 = "4 $5,000 TO LESS THAN $20,000"  
5 = "5 $20,000 OR MORE" ;
```

## SAS ALGORITHM FOR DEMENTIA

```
VALUE W500188W
-7 = '-7 RF'
-8 = '-8 DK'
-1 = '-1 Inapplicable'
-9 = '-9 Missing'
 1 = "1 LESS THAN $200"
 2 = "2 $200 TO LESS THAN $1,000"
 3 = "3 $1,000 TO LESS THAN $4,000"
 4 = "4 $4,000 TO LESS THAN $16,000"
 5 = "5 $16,000 OR MORE" ;

VALUE W500189W
-7 = '-7 RF'
-8 = '-8 DK'
-1 = '-1 Inapplicable'
-9 = '-9 Missing'
 1 = "1 LESS THAN $400"
 2 = "2 $400 TO LESS THAN $1,000"
 3 = "3 $1,000 TO LESS THAN $2,000"
 4 = "4 $2,000 TO LESS THAN $11,000"
 5 = "5 $11,000 OR MORE" ;

VALUE W500190W
-7 = '-7 RF'
-8 = '-8 DK'
-1 = '-1 Inapplicable'
-9 = '-9 Missing'
 1 = "1 LESS THAN $30,000"
 2 = "2 $30,000 TO LESS THAN $101,000"
 3 = "3 $101,000 TO LESS THAN $247,000"
 4 = "4 $247,000 TO LESS THAN $703,000"
 5 = "5 $703,000 OR MORE" ;

VALUE W500191W
-7 = '-7 RF'
-8 = '-8 DK'
-1 = '-1 Inapplicable'
-9 = '-9 Missing'
 1 = "1 LESS THAN $18,000"
 2 = "2 $18,000 TO LESS THAN $68,000"
 3 = "3 $68,000 TO LESS THAN $122,000"
 4 = "4 $122,000 TO LESS THAN $293,000"
 5 = "5 $293,000 OR MORE" ;

VALUE W500192W
-7 = '-7 RF'
-8 = '-8 DK'
-1 = '-1 Inapplicable'
-9 = '-9 Missing'
 1 = "1 LESS THAN $3,600"
 2 = "2 $3,600 TO LESS THAN $12,000"
 3 = "3 $12,000 TO LESS THAN $25,000"
 4 = "4 $25,000 TO LESS THAN $64,000"
 5 = "5 $64,000 OR MORE" ;

VALUE W500193W
-7 = '-7 RF'
-8 = '-8 DK'
-1 = '-1 Inapplicable'
-9 = '-9 Missing'
 1 = "1 LESS THAN $3,600"
 2 = "2 $3,600 TO LESS THAN $7,200"
```

## SAS ALGORITHM FOR DEMENTIA

```
3 = "3 $7,200 TO LESS THAN $14,000"  
4 = "4 $14,000 TO LESS THAN $38,000"  
5 = "5 $38,000 OR MORE" ;  
VALUE W500194W  
-7 = '-7 RF'  
-8 = '-8 DK'  
-1 = '-1 Inapplicable'  
-9 = '-9 Missing'  
1 = "1 LESS THAN $30,000"  
2 = "2 $30,000 TO LESS THAN $43,000"  
3 = "3 $43,000 TO LESS THAN $66,000"  
4 = "4 $66,000 TO LESS THAN $109,000"  
5 = "5 $109,000 OR MORE" ;  
VALUE W500195W  
-7 = '-7 RF'  
-8 = '-8 DK'  
-1 = '-1 Inapplicable'  
-9 = '-9 Missing'  
1 = "1 LESS THAN $18,000"  
2 = "2 $18,000 TO LESS THAN $22,000"  
3 = "3 $22,000 TO LESS THAN $36,000"  
4 = "4 $36,000 TO LESS THAN $56,000"  
5 = "5 $56,000 OR MORE" ;  
VALUE W500209W  
-7 = '-7 RF'  
-8 = '-8 DK'  
-1 = '-1 Inapplicable'  
-9 = '-9 Missing'  
1 = "1 YES"  
2 = "2 NO"  
3 = "3 CANT DO - DONT DO" ;  
VALUE W500196W  
-7 = '-7 RF'  
-8 = '-8 DK'  
-1 = '-1 Inapplicable'  
-9 = '-9 Missing'  
1 = "1 LESS THAN $2,500"  
2 = "2 $2,500 TO LESS THAN $5,000"  
3 = "3 $5,000 TO LESS THAN $10,000"  
4 = "4 $10,000 TO LESS THAN $20,000"  
5 = "5 $20,000 TO LESS THAN $50,000"  
6 = "6 $50,000 OR MORE" ;  
VALUE dage2us  
0 = "0 Less than age 1"  
997 = "997 Born in US"  
-8 = "-8 DK"  
-7 = "-7 RF"  
-1 = "-1 Inapplicable";  
VALUE locsp  
-9 = "-9 MISSING"  
-8 = "-8 DK"  
-7 = "-7 RF"  
-1 = "-1 Inapplicable"  
1 = "1 Independent Living"  
2 = "2 Assisted Living"  
3 = "3 Special Care Unit"  
4 = "4 Nursing Home"
```

## SAS ALGORITHM FOR DEMENTIA

```
8 = "8 Not Reported" ;

VALUE resid
-9 = '-9 Missing'
-8 = "-8 DK"
-7 = "-7 RF"
-1 = "-1 Inapplicable"
1 = "Community"
2 = "Residential care not nursing home (SP interview)"
3 = "Residential care not nursing home (FQ only)"
4 = "Nursing home (SP interview)"
5 = "Nursing home (FQ only)"
6 = "Deceased"
7 = "Residential care not nursing home in R1 and R2 (FQ only)"
8 = "Nursing home in R1 and R2 (FQ only)";

VALUE residlml
1 = "1 Community"
2 = "2 Residential care"
-1 = "-1 Inapplicable"
-9 = '-9 Missing';

VALUE SP50139W
1 = "1 White/Caucasian"
2 = "2 Black/African American"
3 = "3 Other"
-7 = '-7 RF'
-8 = '-8 DK'
-9 = '-9 Missing';

VALUE Locat15w
1= "1 Lives in same City and State as at age 15"
2= "2 Lives in same state but different City (or DKRF city) as age
15"
3= "3 Does not live in same State as age 15"
-1= "-1 Inapplicable"
-7 = '-7 RF'
-8 = '-8 DK'
-9 = '-9 Missing';

Value dresnew
1 = "1 same residence as last int"
2 = "2 new residence since last int"
-1= "-1 Inapplicable"
-7 = '-7 RF'
-8 = '-8 DK'
-9 = '-9 Missing';

Value dcontnew
1 = "1 Continuing sample from R1"
2 = "2 New sample in R5"
-1= "-1 Inapplicable"
-7 = '-7 RF'
-8 = '-8 DK'
-9 = '-9 Missing';

VALUE DMDDEVYR
1 = ' 1 No Mobility device use in last year/since last interview'
```

## SAS ALGORITHM FOR DEMENTIA

```
2 = ' 2 Mobility device use in last year/since last interview'  
-1 = '-1 Inapplicable '  
-7 = '-7 RF'  
-8 = '-8 DK'  
-9 = '-9 Missing';
```

### VALUE DMDEVST

```
0 = '0 less than 1 month of mobility device use'  
1 = '1 month of mobility device use'  
2 = '2 months of mobility device use'  
3 = '3 months of mobility device use'  
4 = '4 months of mobility device use'  
5 = '5 months of mobility device use'  
6 = '6 months of mobility device use'  
7 = '7 months of mobility device use'  
8 = '8 months of mobility device use'  
9 = '9 months of mobility device use'  
10 = '10 months of mobility device use'  
11 = '11 months of mobility device use'  
-7 = '-7 used last month but RF number of months of use in year'  
-8 = '-8 used last month but DK number of months of use in year'  
-1 = '-1 Inapplicable '  
-2 = '-2 Not asked of continuing sample';
```

### VALUE DMDEVEND

```
0 = '0 Between 11 and 12 months since device use ended'  
1 = '1 month since mobility device use ended'  
2 = '2 months since mobility device use ended'  
3 = '3 months since mobility device use ended'  
4 = '4 months since mobility device use ended'  
5 = '5 months since mobility device use ended'  
6 = '6 months since mobility device use ended'  
7 = '7 months since mobility device use ended'  
8 = '8 months since mobility device use ended'  
9 = '9 months since mobility device use ended'  
10 = '10 months since mobility device use ended'  
11 = '11 months since mobility device use ended'  
-7 = '-7 no use last month and RF number of months since device use  
ended'  
-8 = '-8 no use last month and DK number of months since device use  
ended'  
-1 = '-1 Inapplicable '  
-2 = '-2 Not asked of continuing sample' ;
```

### VALUE DMDHLPYR

```
1 = " 1 No mobility help in last year/since last interview"  
2 = " 2 Mobility help in last year/since last interview"  
-7 = " -7 RF"  
-8 = " -8 DK"  
-1 = " -1 Inapplicable "  
-2 = '-2 Not asked of continuing sample' ;
```

### VALUE DMDHLPST

```
0 = '0 less than 1 month of help'  
1 = '1 month of help'  
2 = '2 months of help'  
3 = '3 months of help'  
4 = '4 months of help'
```

## SAS ALGORITHM FOR DEMENTIA

```
5 = '5 months of help'
6 = '6 months of help'
7 = '7 months of help'
8 = '8 months of help'
9 = '9 months of help'
10 = '10 months of help'
11 = '11 months of help'
-7 = '-7 help last month but RF number of months of help in year'
-8 = '-8 help last month but DK number of months of help in year'
-1 = "-1 Inapplicable "
-2 = "-2 Not asked of continuing sample ";
VALUE DMDHLPEN
0 = '0 less than 1 month since help ended'
1 = '1 month since help ended'
2 = '2 months since help ended'
3 = '3 months since help ended'
4 = '4 months since help ended'
5 = '5 months since help ended'
6 = '6 months since help ended'
7 = '7 months since help ended'
8 = '8 months since help ended'
9 = '9 months since help ended'
10 = '10 months since help ended'
11 = '11 months since help ended'
-7 = '-7 no help last month and RF number of months since help ended'
-8 = '-8 no help last month and DK number of months since help ended'
-1 = '-1 Inapplicable '
-2 = '-2 Not asked of continuing sample';
VALUE DMHLPYRS
0 = '0 none or less than 1 year'
997 = '997 since birth'
-7 = '-7 RF'
-8 = '-8 DK'
-1 = '-1 Inapplicable '
-2 = '-2 Not asked of continuing sample'
-9 = '-9 Missing';
VALUE DSDHLPYR
1 = ' 1 No self care help in last year/since last interview'
2 = ' 2 Self care help in last year/since last interview'
-1 = '-1 Inapplicable'
-7 = '-7 DK'
-8 = '-8 RF'
-9 = '-9 Missing';
VALUE DSHLPND
0 = ' 0 Between 11 and 12 months since self care help ended'
1 = '1 Month since self care help ended'
2 = '2 Months since self care help ended'
3 = '3 Months since self care help ended'
4 = '4 Months since self care help ended'
5 = '5 Months since self care help ended'
6 = '6 Months since self care help ended'
7 = '7 Months since self care help ended'
8 = '8 Months since self care help ended'
9 = '9 Months since self care help ended'
10 = '10 Months since self care help ended'
11 = '11 Months since self care help ended'
-7 = '-7 No help last month and RF number of months since help ended'
```



## SAS ALGORITHM FOR DEMENTIA

```
-8 = '-8 No help last month and DK number of months since help ended'
-1 = '-1 Inapplicable'
  -2 = '-2 Not asked of continuing sample'
-9 = '-9 Missing'      ;

VALUE DSHLPYRS
  0 = ' 0 None or less than 1 year of self care help'
-7 = '-7 RF'
-8 = '-8 DK'
-1 = '-1 Inapplicable'
  -2 = '-2 Not asked of continuing sample'
-9 = '-9 Missing'
 997 = '997 since birth';

VALUE SP5RH7W
-7 = '-7 RF'
-8 = '-8 DK'
-1 = '-1 Inapplicable'
-9 = '-9 Missing'
  1 = "1 As an overnight patient in a hospital, nursing home, or
rehab facility"
  2 = "2 At an outpatient center, clinic, or doctors office or
therapists office"
  3 = "3 At home"
  4 = "4 Somewhere else"  ;

VALUE SP5LF5W
-7 = '-7 RF'
-8 = '-8 DK'
-1 = '-1 Inapplicable'
-9 = '-9 Missing'
997 = "997 Number of hours vary each week"  ;

VALUE DMH_GRP
  1 = "1 Help started"
  2 = "2 Help ended"
  3 = "3 Help both interviews with gap"
  4 = "4 Help both interviews with no gap"
  5 = "5 Help between interviews only"
  6 = "6 No help either interview or between"
 11 = "11 Help started (month started missing)"
 21 = "21 Help ended (month ended missing)"
 41 = "41 Help both interviews (DK whether gap)"
 61 = "61 No help either interview (DK whether help between)"
-9 = "-9 Missing"
-1 = "-1 Inapplicable"
  -3 = "-3 Not asked of new sample"
-999 = "-999 Not determined"  ;

VALUE DMU_GRP
  1 = "1 Use started"
  2 = "2 Use ended"
  3 = "3 Use both interviews with gap"
  4 = "4 Use both interviews with no gap"
  5 = "5 Use between interviews only "
  6 = "6 No use either interview or between"
 11 = "11 Use started (month started missing)"
 21 = "21 Use ended (month ended missing)"
 41 = "41 Use both interviews (DK whether gap)"
```

## SAS ALGORITHM FOR DEMENTIA

```

61 = "61 No use either interview (DK whether use between)"
-9 = "-9 Missing"
-1 = "-1 Inapplicable"
    -3 = "-3 Not asked of new sample"
-999 = "-999 Not determined" ;

VALUE DMDS5FLG
-1 = "-1 Inapplicable"
    -3 = "-3 Not asked of new sample"
0 = "0 No current SP interview"
1 = "1 No SP interview last round"
2 = "2 Died and month death missing"
3 = "3 Died <=1 month after last interview"
4 = "4 Died 12-13 months after last interview"
7 = "7 Skipped 1 or more help questions" ;

VALUE DS_GRP
1 = "1 Help started"
2 = "2 Help ended"
3 = "3 Help both interviews with gap"
4 = "4 Help both interviews with no gap"
5 = "5 Help between interviews only"
6 = "6 No help either interview or between"
11 = "11 Help started (month started missing)"
21 = "21 Help ended (month ended missing)"
41 = "41 Help both interviews (DK whether gap)"
61 = "61 No help either interview (DK whether help between)"
-9 = "-9 Missing"
-1 = "-1 Inapplicable"
    -3 = "-3 Not asked of new sample"
-999 = "-999 Not determined" ;

value groupmo 1 = "1 Started"
    2 = "2 Ended"
    3 = "3 Both times with gap"
    4 = "4 Both times no gap"
        5 = "5 Between only (end missing)"
    6 = "6 Neither time AND not between"
    11 = "11 Started (start missing)"
    21 = "21 Ended (end missing)"
    41 = "41 Both times (gap missing)"
    61 = "61 Neither time (between missing)"
        -1= "-1 Inapplicable"
        -3="-3 Not asked of new sample"
        -7= "-7 RF"
        -8= "-8 DK"
        -9= "-9 Missing"
    -999 = "-999 Not determined"
    -99 = "-99 Partial" ;

VALUE nw_mths 0 = "0 Less than 1 month"
1 ="1 month"
2 ="2 months"
3 ="3 months"
4 ="4 months"
5 ="5 months"
6 ="6 months"

```

## SAS ALGORITHM FOR DEMENTIA

```
7 = "7 months"
8 = "8 months"
9 = "9 months"
10= "10 months"
11= "11 months"
12= "12 months"
13= "13 months"
14= "14 months"
15= "15 months"
16= "16 months"
17= "17 months"
18= "18 months"
19= "19 months"
20= "20 months"
90= "90 Last round disputed"
999= "999 No months"
-1= "-1 Inapplicable"
  -3= "-3 Not asked of new sample"
-7= "-7 RF"
-8= "-8 DK"
-9= "-9 Missing"
-10= "-10 Not ascertained"
-12= "-12 Outside of range (greater than months between
interviews)"
-13= "-13 None"
-999= "-999 Not determined"
-99= "-99 Partial";
  VALUE chntinhh
1 = "1 Yes, not in household"
-1= "-1 Inapplicable"
-7= "-7 RF"
-8= "-8 DK"
-9= "-9 Missing";
  Value d4mssadd
-1= '-1 Inapplicable'
0='0 no flags and added at undetermined section'
1='1 no flags and added at CL section'
2='2 no flags and added at DT section'
3='3 no flags and added at EW section'
4='4 no flags and added at HA section'
5='5 no flags and added at HO section'
6='6 no flags and added at MC section'
7='7 no flags and added at MO section'
8='8 no flags and added at PA section'
9='9 no flags and added at PE section'
10='10 no flags and added at SC section'
11='11 no flags and added at SN section'
12='12 no flags and added at CS section'
13='13 no flags and added at HH section'
14='14 no flags and added at IS section'
15='15 no flags and added at HL section'
16='16 no flags and added at SL section';
  VALUE HA5DWHL
1 = "1 Meals on wheels last month"
-1 = "-1 Inapplicable";
  VALUE HA5DTKO
1 = "1 Restaurant or take out last month"
```

## SAS ALGORITHM FOR DEMENTIA

```
        -1 = "-1 Inapplicable";
VALUE RE5BLDG
    -7 = '-7 RF'
    -8 = '-8 DK'
    -1 = '-1 Inapplicable'
    -9 = '-9 Missing'
    1 = "1 Building has one floor"
    2 = "2 Building has multiple floors" ;

VALUE S000163W
    1 = "1 PRIVACY MORE IMPORTANT"
    2 = "2 SOCIALIZE MORE IMPORTANT"
    3 = "3 BOTH IMPORTANT/CANT CHOOSE/DONT KNOW"
        -1= "-1 Inapplicable"
        -7= "-7 RF"
        -8= "-8 DK"
        -9= "-9 Missing";

VALUE S000164W
    1 = "1 SOCIALIZE MORE IMPORTANT"
    2 = "2 PRIVACY MORE IMPORTANT"
    3 = "3 BOTH IMPORTANT/CANT CHOOSE/DONT KNOW"
        -1= "-1 Inapplicable"
        -7= "-7 RF"
        -8= "-8 DK"
        -9= "-9 Missing";

VALUE S000165W
    1 = "1 BEING SAFE MORE IMPORTANT"
    2 = "2 HAVING CHOICES MORE IMPORTANT"
    3 = "3 BOTH IMPORTANT/CANT CHOOSE/DONT KNOW"
    -1= "-1 Inapplicable"
    -7= "-7 RF"
    -8= "-8 DK"
    -9= "-9 Missing" ;

VALUE S000166W
    1 = "1 HAVING CHOICES MORE IMPORTANT"
    2 = "2 BEING SAFE MORE IMPORTANT"
    3 = "3 BOTH IMPORTANT/CANT CHOOSE/DONT KNOW"
    -1= "-1 Inapplicable"
    -7= "-7 RF"
    -8= "-8 DK"
    -9= "-9 Missing" ;

VALUE S000167W
    1 = "1 PRIVACY MORE IMPORTANT"
    2 = "2 BEING SAFE MORE IMPORTANT"
    3 = "3 BOTH IMPORTANT/CANT CHOOSE/DONT KNOW"
    -1= "-1 Inapplicable"
    -7= "-7 RF"
    -8= "-8 DK"
    -9= "-9 Missing" ;

VALUE S000168W
    1 = "1 BEING SAFE MORE IMPORTANT"
    2 = "2 PRIVACY MORE IMPORTANT"
    3 = "3 BOTH IMPORTANT/CANT CHOOSE/DONT KNOW"
```

## SAS ALGORITHM FOR DEMENTIA

```
-1= "-1 Inapplicable"  
-7= "-7 RF"  
-8= "-8 DK"  
-9= "-9 Missing" ;
```

```
VALUE S000169W  
  1 = "1 SOCIALIZING MORE IMPORTANT"  
  2 = "2 HAVING CHOICES MORE IMPORTANT"  
  3 = "3 BOTH IMPORTANT/CANT CHOOSE/DONT KNOW"  
-1= "-1 Inapplicable"  
-7= "-7 RF"  
-8= "-8 DK"  
-9= "-9 Missing" ;
```

```
VALUE S000170W  
  1 = "1 HAVING CHOICES MORE IMPORTANT"  
  2 = "2 SOCIALIZING MORE IMPORTANT"  
  3 = "3 BOTH IMPORTANT/CANT CHOOSE/DONT KNOW"  
-1= "-1 Inapplicable"  
-7= "-7 RF"  
-8= "-8 DK"  
-9= "-9 Missing" ;
```

```
VALUE S000171W  
  1 = "1 PRIVACY MORE IMPORTANT"  
  2 = "2 HAVING CHOICES MORE IMPORTANT"  
  3 = "3 BOTH IMPORTANT/CANT CHOOSE/DONT KNOW"  
-1= "-1 Inapplicable"  
-7= "-7 RF"  
-8= "-8 DK"  
-9= "-9 Missing" ;
```

```
VALUE S000172W  
  1 = "1 HAVING CHOICES MORE IMPORTANT"  
  2 = "2 PRIVACY MORE IMPORTANT"  
  3 = "3 BOTH IMPORTANT/CANT CHOOSE/DONT KNOW"  
-1= "-1 Inapplicable"  
-7= "-7 RF"  
-8= "-8 DK"  
-9= "-9 Missing" ;
```

```
VALUE S000173W  
  1 = "1 SOCIALIZING MORE IMPORTANT"  
  2 = "2 BEING SAFE MORE IMPORTANT"  
  3 = "3 BOTH IMPORTANT/CANT CHOOSE/DONT KNOW"  
-1= "-1 Inapplicable"  
-7= "-7 RF"  
-8= "-8 DK"  
-9= "-9 Missing" ;
```

```
VALUE S000174W  
  1 = "1 BEING SAFE MORE IMPORTANT"  
  2 = "2 SOCIALIZING MORE IMPORTANT"  
  3 = "3 BOTH IMPORTANT/CANT CHOOSE/DONT KNOW"  
-1= "-1 Inapplicable"  
-7= "-7 RF"  
-8= "-8 DK"
```

## SAS ALGORITHM FOR DEMENTIA

```
-9= "-9 Missing" ;
```

```
VALUE S000175W
```

```
1 = "1 LESS THAN 1 HOUR"  
2 = "2 MORE THAN 1 HOUR"  
3 = "3 ABOUT 1 HOUR"  
-1= "-1 Inapplicable"  
-7= "-7 RF"  
-8= "-8 DK"  
-9= "-9 Missing" ;
```

```
VALUE S000176W
```

```
1 = "1 LESS THAN 15 MINUTES"  
2 = "2 15 MINUTES"  
3 = "3 BETWEEN 15 AND 30 MINUTES"  
4 = "4 30 MINUTES"  
5 = "5 BETWEEN 30 AND 45 MINUTES"  
6 = "6 45 MINUTES"  
7 = "7 BETWEEN 45 AND 60 MINUTES"  
-1= "-1 Inapplicable"  
-7= "-7 RF"  
-8= "-8 DK"  
-9= "-9 Missing" ;
```

```
VALUE S000177W
```

```
1 = "1 ABOUT 1 HOURS"  
2 = "2 ABOUT 2 HOURS"  
3 = "3 ABOUT 3 HOURS"  
4 = "4 ABOUT 4 HOURS"  
5 = "5 ABOUT 5 HOURS"  
6 = "6 6 OR MORE HOURS"  
-1= "-1 Inapplicable"  
-7= "-7 RF"  
-8= "-8 DK"  
-9= "-9 Missing" ;
```

```
VALUE W600001W
```

```
-7 = '-7 RF'  
-8 = '-8 DK'  
-1 = '-1 Inapplicable'  
-9 = '-9 Missing'  
1 = "1 STRONGLY AGREE"  
2 = "2 AGREE"  
3 = "3 DISAGREE"  
4 = "4 STRONGLY DISAGREE";
```

```
VALUE W600002W
```

```
-7 = '-7 RF'  
-8 = '-8 DK'  
-1 = '-1 Inapplicable'  
-9 = '-9 Missing'  
0 = "0 NONE"  
1 = "1 1-2"  
2 = "2 3-5"  
3 = "3 6-10"  
4 = "4 11-15"  
5 = "5 16-20"  
6 = "6 MORE THAN 20";
```

## SAS ALGORITHM FOR DEMENTIA

```

VALUE W600003W
-7 = '-7 RF'
-8 = '-8 DK'
-1 = '-1 Inapplicable'
-9 = '-9 Missing'
 1 = "1 A (picture showing 4 pills)"
 2 = "2 B (picture showing 8 pills)"
 3 = "3 C (picture showing 12 pills)"
 4 = "4 D (picture showing 16 pills)"
 5 = "5 E (picture showing 20 pills)"
 6 = "6 F (picture showing 24 pills)";

VALUE YNF
-7 = '-7 RF'
-8 = '-8 DK'
-1 = '-1 Inapplicable'
-9 = '-9 Missing'
 1 = "1 Yes"
 2 = "2 No";

VALUE FQ6DLOCA
 1 = "1 Independent Living"
 2 = "2 Assisted Living"
 3 = "3 Special Care Unit"
 4 = "4 Nursing home"
-8 = "-8 Not reported"
-1 = "-1 Inapplicable";

VALUE R6DRES1A
 1 = '1 Community'
 2 = '2 Residential Care'
-1 = '-1 Inapplicable'
-9 = '-9 Missing';

VALUE SP30023W
-7 = '-7 RF'
-8 = '-8 DK'
-1 = '-1 Inapplicable'
-9 = '-9 Missing'
 1 = "1 Building has one floor"
 2 = "2 Building has multiple floors" ;

VALUE RE5BLDG
-7 = '-7 RF'
-8 = '-8 DK'
-1 = '-1 Inapplicable'
-9 = '-9 Missing'
 1 = "1 Building has one floor"
 2 = "2 Building has multiple floors" ;

VALUE WORDRECC
-1 = '-1 Inapplicable'
-2 = '-2 Proxy says cannot ask SP'
-3 = '-3 Proxy says can ask SP but SP unable to answer'
-7 = '-7 SP refused activity'
-9 = '-9 Missing';

VALUE OLDMTHS
-7 = '-7 RF'
-8 = '-8 DK'
-1 = '-1 Inapplicable'
-9 = '-9 Missing';

VALUE MONTHS

```

## SAS ALGORITHM FOR DEMENTIA

```
-7 = '-7 RF'
-8 = '-8 DK'
-1 = '-1 Inapplicable'
-9 = '-9 Missing';

      VALUE  FLAGS
-1 = "-1 Inapplicable"
-3 = "-3 Not asked of new sample"
 0 = "0 No current SP interview"
 1 = "1 No SP interview last round"
 2 = "2 Died and month death missing"
 3 = "3 Died <=1 month after last interview"
 4 = "4 Died 12-13 months after last interview"
 7 = "7 Skipped 1 or more help questions" ;

VALUE  DMDEVUSE
 0   = '0 none or less than 1 year'
997 = '997 since birth'
-7   = '-7 RF'
-8   = '-8 DK'
-1   = '-1 Inapplicable '
-2   = '-2 Not asked of continuing sample'
-9   = '-9 Missing';

VALUE  SPPB_MISSING
-7 = '-7 RF'
-8 = '-8 DK'
-9 = '-9 Missing'
-1=" -1 Inapplicable"
 1="1 Proxy interview"
 2="2 Missing walk and repeat chair and balance"
 3="3 Missing walk and repeat chair"
 4="4 Missing walk and balance"
 5="5 Missing repeat chair and balance"
 6="6 Missing walk"
 7="7 Missing repeat chair"
 8="8 Missing balance"
 9="9 No space"
10="10 No chair"
11="11 No space walk and no chair"
12="12 No space walk and non-safety missing"
13="13 No chair and non-safety missing"
14="14 Non-safety walk"
15="15 Non-safety chair"
16="16 Non-safety balance"
17="17 Non-safety walk and chair"
18="18 Non-safety walk and balance"
19="19 Non-safety chair and balance"
20="20 Non-safety walk and chair and balance";

VALUE  W700BC2W
-7 = '-7 RF'
-8 = '-8 DK'
-1 = '-1 Ineligible'
-9 = '-9 Missing'
 1 = "1 Eligible and consented"
 2 = "2 Eligible and did not consent"
 3 = "3 Ineligible, proxy respondent";

Value  LMLHELPR
 1 = '1 Yes'
 2 = '2 No'
```



## SAS ALGORITHM FOR DEMENTIA

```
-8 = '-8 DK'
-7 = '-7 RF'
-2 = '-2 Helper is relative'
-1 = '-1 Inapplicable';
VALUE W000RUCC
  -1 = '-1 Inapplicable'
  1 = '1 Metro - Counties in metro areas of 1 million population or
more'
  2 = '2 Metro - Counties in metro areas of 250,000 to 1 million
population'
  3 = '3 Metro - Counties in metro areas of fewer than 250,000
population'
  4 = '4 Nonmetro - Urban population of 20,000 or more, adjacent to
a metro area'
  5 = '5 Nonmetro - Urban population of 20,000 or more, not
adjacent to a metro area'
  6 = '6 Nonmetro - Urban population of 2,500 to 19,999, adjacent
to a metro area'
  7 = '7 Nonmetro - Urban population of 2,500 to 19,999, not
adjacent to a metro area'
  8 = '8 Nonmetro - Completely rural or less than 2,500 urban
population';
VALUE W00metro
  -1 = '-1 Inapplicable'
  1 = '1 Metropolitan'
  2 = '2 Non-metropolitan';
run;
```

```
/*Run NHATS R1 OP Sen Dem format statement */
```

```
PROC FORMAT ;
```

```
VALUE W000073W
  -7 = '-7 RF'
  -8 = '-8 DK'
  -1 = '-1 Inapplicable'
  -9 = '-9 Missing'
  1 = " 1 JANUARY"
  2 = " 2 FEBRUARY"
  3 = " 3 MARCH"
  4 = " 4 APRIL"
  5 = " 5 MAY"
  6 = " 6 JUNE"
  7 = " 7 JULY"
  8 = " 8 AUGUST"
  9 = " 9 SEPTEMBER"
 10 = "10 OCTOBER"
 11 = "11 NOVEMBER"
 12 = "12 DECEMBER" ;
VALUE DOPAGE4C
  1 = " 1 - UNDER 20"
  2 = " 2 - 20-24"
  3 = " 3 - 25-29"
  4 = " 4 - 30-34"
```

## SAS ALGORITHM FOR DEMENTIA

```
5 = " 5 - 35-39"
6 = " 6 - 40-44"
7 = " 7 - 45-49"
8 = " 8 - 50-54"
9 = " 9 - 55-59"
10 = "10 - 60-65"
11 = "11 - 66-69"
12 = "12 - 70-74"
13 = "13 - 75-79"
14 = "14 - 80-85"
15 = "15 - 86-89"
16 = "16 - 90-94"
17 = "17 - 95-99"
18 = "18 - 100 +"
-7 = '-7 RF'
-8 = '-8 DK'
-1 = '-1 Inapplicable'
-9 = '-9 Missing';

VALUE RFDK_F
-7 = '-7 RF'
-8 = '-8 DK'
-1 = '-1 Inapplicable'
-9 = '-9 Missing';

RUN;

/*Run NHATS R1 SP Sen Dem format statement */

PROC FORMAT ;

VALUE W000005W
-7 = '-7 RF'
-8 = '-8 DK'
-1 = '-1 Inapplicable'
-9 = '-9 Missing'
1 = " 1 YES"
2 = " 2 NO" ;
VALUE W000073W
-7 = '-7 RF'
-8 = '-8 DK'
-1 = '-1 Inapplicable'
-9 = '-9 Missing'
1 = " 1 JANUARY"
2 = " 2 FEBRUARY"
3 = " 3 MARCH"
4 = " 4 APRIL"
5 = " 5 MAY"
6 = " 6 JUNE"
7 = " 7 JULY"
8 = " 8 AUGUST"
9 = " 9 SEPTEMBER"
10 = "10 OCTOBER"
11 = "11 NOVEMBER"
12 = "12 DECEMBER" ;
VALUE W000101W
```

## SAS ALGORITHM FOR DEMENTIA

```
-7 = '-7 RF'  
-8 = '-8 DK'  
-1 = '-1 Inapplicable'  
-9 = '-9 Missing'  
1 = " 1 {WHITE}"  
2 = " 2 {BLACK}"  
3 = " 3 {AMERICAN INDIAN}"  
4 = " 4 {ALASKAN NATIVE}"  
5 = " 5 {ASIAN}"  
6 = " 6 {NATIVE HAWAIIAN}"  
7 = " 7 {PACIFIC ISLANDER}"  
8 = " 8 {OTHER}" ;  
VALUE RFDK_F  
-7 = '-7 RF'  
-8 = '-8 DK'  
-1 = '-1 Inapplicable'  
-9 = '-9 Missing';
```

**RUN;**

```
/*Run NSOC data format statements*/
```

```
/* NSOC_Round_1_Combined_PROC_FORMAT_Statement_V3.sas */
```

**PROC FORMAT ;**

```
VALUE NSOC001W
```

```
1 = "1 MALE"  
2 = "2 FEMALE" ;
```

```
VALUE NSOC002W
```

```
1 = "1 SAMPLE PERSON"  
2 = "2 SPOUSE/PARTNER"  
3 = "3 DAUGHTER"  
4 = "4 SON"  
5 = "5 DAUGHTER-IN-LAW"  
6 = "6 SON-IN-LAW"  
7 = "7 STEPDAUGHTER"  
8 = "8 STEPSON"  
9 = "9 SISTER"  
10 = "10 BROTHER"  
11 = "11 SISTER-IN-LAW"  
12 = "12 BROTHER-IN-LAW"  
13 = "13 MOTHER"  
14 = "14 STEPMOTHER"  
15 = "15 MOTHER-IN-LAW"  
16 = "16 FATHER"  
17 = "17 STEPFATHER"  
18 = "18 FATHER-IN-LAW"  
19 = "19 GRANDDAUGHTER"  
20 = "20 GRANDSON"  
21 = "21 NIECE"  
22 = "22 NEPHEW"  
23 = "23 AUNT"  
24 = "24 UNCLE"  
25 = "25 COUSIN"
```

## SAS ALGORITHM FOR DEMENTIA

```
26 = "26 STEPDAUGHTER'S SON/DAUGHTER"  
27 = "27 STEPSON'S SON/DAUGHTER"  
28 = "28 DAUGHTER-IN-LAW'S SON/DAUGHTER"  
29 = "29 SON-IN-LAW'S SON/DAUGHTER"  
30 = "30 BOARDER/RENTER"  
31 = "31 LIVE-IN HOUSEKEEPER/EMPLOYEE"  
32 = "32 ROOMMATE"  
33 = "33 EX-WIFE/EX-HUSBAND"  
34 = "34 BOYFRIEND/GIRLFIEND"  
35 = "35 NEIGHBOR"  
36 = "36 FRIEND"  
37 = "37 STAFF PERSON AT THE PLACE SP LIVES"  
38 = "38 CO-WORKER"  
39 = "39 MINISTER, PRIEST, OR OTHER CLERGY"  
40 = "40 PSYCHIATRIST, PSYCHOLOGIST, COUNSELOR, OR THERAPIST"  
91 = "91 OTHER RELATIVE"  
92 = "92 OTHER NONRELATIVE" ;
```

```
VALUE NSOC003W
```

```
-7 = '-7 RF'  
-8 = '-8 DK'  
-1 = '-1 Inapplicable'  
-9 = '-9 Missing'  
1 = "1 YES"  
2 = "2 NO" ;
```

```
/*
```

```
VALUE NSOC004W
```

```
1 = "Yes"  
2 = "No" ;
```

```
VALUE NSOC005W
```

```
1 = "Yes"  
2 = "No" ;
```

```
VALUE NSOC006W
```

```
1 = "Yes"  
2 = "No" ;
```

```
VALUE NSOC007W
```

```
1 = "Yes"  
2 = "No" ;*/
```

```
VALUE NSOC008W
```

```
1 = "1 RECORD INTERVIEW"  
2 = "2 DO NOT RECORD INTERVIEW" ;
```

```
VALUE NSOC009W
```

```
1 = "1 Continue" ;
```

```
VALUE NSOC010W
```

```
-7 = '-7 RF'  
-8 = '-8 DK'  
-1 = '-1 Inapplicable'  
-9 = '-9 Missing'  
1 = "1 EVERY DAY"  
2 = "2 MOST DAYS"  
3 = "3 SOME DAYS"
```

## SAS ALGORITHM FOR DEMENTIA

```
4 = "4 RARELY"  
5 = "5 NEVER" ;
```

```
VALUE NSOC011W
```

```
-7 = '-7 RF'  
-8 = '-8 DK'  
-1 = '-1 Inapplicable'  
-9 = '-9 Missing'  
1 = "1 YES"  
2 = "2 NO"  
7 = "7 SP DOES NOT TAKE ANY PRESCRIBED MEDICINES" ;
```

```
VALUE NSOC012W
```

```
-7 = '-7 RF'  
-8 = '-8 DK'  
-1 = '-1 Inapplicable'  
-9 = '-9 Missing'  
1 = "1 EVERY DAY"  
2 = "2 MOST DAYS"  
3 = "3 SOME DAYS"  
4 = "4 RARELY" ;
```

```
VALUE NSOC013W
```

```
-7 = '-7 RF'  
-8 = '-8 DK'  
-1 = '-1 Inapplicable'  
-9 = '-9 Missing'  
1 = "1 WALK"  
2 = "2 DRIVE"  
3 = "3 SOMEONE DRIVES ME"  
4 = "4 TAXI"  
5 = "5 BUS"  
6 = "6 SUBWAY/TRAIN/LIGHT RAIL"  
7 = "7 TRAIN"  
8 = "8 AIRPLANE/FLY"  
91 = "91 OTHER (SPECIFY)" ;
```

```
VALUE NSOC014W
```

```
-7 = '-7 RF'  
-8 = '-8 DK'  
-1 = '-1 Inapplicable'  
-9 = '-9 Missing'  
1 = "1 MINUTES"  
2 = "2 HOURS" ;
```

```
VALUE NSOC015W
```

```
-7 = '-7 RF'  
-8 = '-8 DK'  
-1 = '-1 Inapplicable'  
-9 = '-9 Missing'  
1 = "1 JANUARY"  
2 = "2 FEBRUARY"  
3 = "3 MARCH"  
4 = "4 APRIL"  
5 = "5 MAY"  
6 = "6 JUNE"  
7 = "7 JULY"
```

## SAS ALGORITHM FOR DEMENTIA

```
8 = "8 AUGUST"  
9 = "9 SEPTEMBER"  
10 = "10 OCTOBER"  
11 = "11 NOVEMBER"  
12 = "12 DECEMBER" ;
```

```
VALUE NSOC016W  
-7 = '-7 RF'  
-8 = '-8 DK'  
-1 = '-1 Inapplicable'  
-9 = '-9 Missing'  
1 = "1 REGULAR SCHEDULE"  
2 = "2 VARIED" ;
```

```
VALUE NSOC017W  
-7 = '-7 RF'  
-8 = '-8 DK'  
-1 = '-1 Inapplicable'  
-9 = '-9 Missing'  
1 = "1 LESS THAN HALF"  
2 = "2 ABOUT HALF"  
3 = "3 MORE THAN HALF"  
4 = "4 NEARLY ALL" ;
```

```
VALUE NSOC018W  
-7 = '-7 RF'  
-8 = '-8 DK'  
-1 = '-1 Inapplicable'  
-9 = '-9 Missing'  
1 = "1 NUMBER OF YEARS"  
2 = "2 DATE" ;
```

```
VALUE NSOC019W  
-7 = '-7 RF'  
-8 = '-8 DK'  
-1 = '-1 Inapplicable'  
-9 = '-9 Missing'  
1 = "1 A LOT"  
2 = "2 SOME"  
3 = "3 A LITTLE"  
4 = "4 NOT AT ALL" ;
```

```
VALUE NSOC020W  
-7 = '-7 RF'  
-8 = '-8 DK'  
-1 = '-1 Inapplicable'  
-9 = '-9 Missing'  
1 = "1 VERY MUCH"  
2 = "2 SOMEWHAT"  
3 = "3 NOT SO MUCH" ;
```

```
VALUE NSOC021W  
-7 = '-7 RF'  
-8 = '-8 DK'  
-1 = '-1 Inapplicable'  
-9 = '-9 Missing'  
1 = "1 A LITTLE DIFFICULT"
```

## SAS ALGORITHM FOR DEMENTIA

```
2 = "2"  
3 = "3"  
4 = "4"  
5 = "5 VERY DIFFICULT" ;
```

```
VALUE NSOC022W  
-7 = '-7 RF'  
-8 = '-8 DK'  
-1 = '-1 Inapplicable'  
-9 = '-9 Missing'  
1 = "1 VERY IMPORTANT"  
2 = "2 SOMEWHAT IMPORTANT"  
3 = "3 NOT SO IMPORTANT" ;
```

```
VALUE NSOC023W  
-7 = '-7 RF'  
-8 = '-8 DK'  
-1 = '-1 Inapplicable'  
-9 = '-9 Missing'  
1 = "1 EXCELLENT"  
2 = "2 VERY GOOD"  
3 = "3 GOOD"  
4 = "4 FAIR"  
5 = "5 POOR" ;
```

```
VALUE NSOC024W  
1 = "1 SKIN CANCER"  
2 = "2 BREAST CANCER"  
3 = "3 PROSTATE"  
4 = "4 OTHER TYPE OF CANCER (SPECIFY)" ;
```

```
VALUE NSOC025W  
-7 = '-7 RF'  
-8 = '-8 DK'  
-1 = '-1 Inapplicable'  
-9 = '-9 Missing'  
1 = "1 NOT AT ALL"  
2 = "2 SEVERAL DAYS"  
3 = "3 MORE THAN HALF THE DAYS"  
4 = "4 NEARLY EVERY DAY" ;
```

```
VALUE NSOC026W  
-7 = '-7 RF'  
-8 = '-8 DK'  
-1 = '-1 Inapplicable'  
-9 = '-9 Missing'  
1 = "1 AGREE STRONGLY"  
2 = "2 AGREE SOMEWHAT"  
3 = "3 DISAGREE SOMEWHAT"  
4 = "4 DISAGREE STRONGLY" ;
```

```
VALUE NSOC027W  
-7 = '-7 RF'  
-8 = '-8 DK'  
-1 = '-1 Inapplicable'  
-9 = '-9 Missing'  
1 = "1 MARRIED"
```

## SAS ALGORITHM FOR DEMENTIA

```
2 = "2 LIVING WITH A PARTNER"  
3 = "3 SEPARATED"  
4 = "4 DIVORCED"  
5 = "5 WIDOWED"  
6 = "6 NEVER MARRIED" ;
```

```
VALUE NSOC028W  
-7 = '-7 RF'  
-8 = '-8 DK'  
-1 = '-1 Inapplicable'  
-9 = '-9 Missing'  
1 = "1 NO SCHOOLING COMPLETED"  
2 = "2 1ST-8TH GRADE"  
3 = "3 9TH-12TH GRADE (NO DIPLOMA)"  
4 = "4 HIGH SCHOOL GRADUATE (HIGH SCHOOL DIPLOMA OR EQUIVALENT)"  
5 = "5 VOCATIONAL, TECHNICAL, BUSINESS, OR TRADE SCHOOL CERTIFICATE OR  
DIPLOMA (BEYOND HIGH SCHOOL LEVEL)"  
6 = "6 SOME COLLEGE BUT NO DEGREE"  
7 = "7 ASSOCIATE'S DEGREE"  
8 = "8 BACHELOR'S DEGREE"  
9 = "9 MASTER'S, PROFESSIONAL, OR DOCTORAL DEGREE" ;
```

```
VALUE NSOC029W  
-7 = '-7 RF'  
-8 = '-8 DK'  
-1 = '-1 Inapplicable'  
-9 = '-9 Missing'  
1 = "1 YES"  
2 = "2 NO"  
3 = "3 RETIRED/DON'T WORK ANYMORE" ;
```

```
VALUE NSOC030W  
-7 = '-7 RF'  
-8 = '-8 DK'  
-1 = '-1 Inapplicable'  
-9 = '-9 Missing'  
1 = "1 YES, LOOKING FOR A JOB"  
2 = "2 YES, ON LAYOFF"  
3 = "3 NO"  
4 = "4 RETIRED/DON'T WORK ANYMORE" ;
```

```
VALUE NSOC031W  
-7 = '-7 RF'  
-8 = '-8 DK'  
-1 = '-1 Inapplicable'  
-9 = '-9 Missing'  
1 = "1 DAYTIME"  
2 = "2 SOME OTHER SCHEDULE" ;
```

```
VALUE NSOC032W  
-7 = '-7 RF'  
-8 = '-8 DK'  
-1 = '-1 Inapplicable'  
-9 = '-9 Missing'  
1 = "1 ENTER NUMBER OF HOURS"  
2 = "2 ENTER NUMBER OF DAYS" ;
```



## SAS ALGORITHM FOR DEMENTIA

```
VALUE NSOC033W
  -7 = '-7 RF'
  -8 = '-8 DK'
  -1 = '-1 Inapplicable'
  -9 = '-9 Missing'
  1 = "1 8-HOUR DAYS"
  2 = "2 SOMETHING LESS"
  3 = "3 SOMETHING MORE" ;

VALUE NSOC034W
  -7 = '-7 RF'
  -8 = '-8 DK'
  -1 = '-1 Inapplicable'
  -9 = '-9 Missing'
  1 = "1 ENTER OCCUPATION"
  2 = "2 CurrentOccupationSame"
  97 = "3 NEVER WORKED ENTIRE LIFE"
  98 = "4 HOMEMAKER/RAISED CHILDREN/WORKED IN THE HOME" ;

VALUE NSOC035W
  -7 = '-7 RF'
  -8 = '-8 DK'
  -1 = '-1 Inapplicable'
  -9 = '-9 Missing'
  1 = "1 MEDICARE"
  2 = "2 MEDICAID"
  3 = "3 PRIVATE HEALTH INSURANCE"
  4 = "4 TRICARE/CHAMPVA"
  91 = "91 OTHER (SPECIFY)" ;

VALUE NSOC036W
  -7 = '-7 RF'
  -8 = '-8 DK'
  -1 = '-1 Inapplicable'
  -9 = '-9 Missing'
  1 = "1 LESS THAN"
  2 = "2 MORE THAN" ;

VALUE NSOC037W
  -7 = '-7 RF'
  -8 = '-8 DK'
  -1 = '-1 Inapplicable'
  -9 = '-9 Missing'
  1 = "1 MORE THAN $1,000"
  2 = "2 LESS THAN $1,000" ;

VALUE NSOC038W
  -7 = '-7 RF'
  -8 = '-8 DK'
  -1 = '-1 Inapplicable'
  -9 = '-9 Missing'
  1 = "1 MORE THAN $500"
  2 = "2 LESS THAN $500" ;

VALUE NSOC039W
  -7 = '-7 RF'
  -8 = '-8 DK'
```

## SAS ALGORITHM FOR DEMENTIA

```
-1 = '-1 Inapplicable'  
-9 = '-9 Missing'  
1 = "1 ENGLISH"  
2 = "2 SPANISH"  
91 = "91 OTHER" ;
```

```
VALUE NSOC040W
```

```
-7 = '-7 RF'  
-8 = '-8 DK'  
-1 = '-1 Inapplicable'  
-9 = '-9 Missing'  
1 = "1 Yes" ;
```

```
VALUE RFDK
```

```
-7 = '-7 RF'  
-8 = '-8 DK'  
-1 = '-1 Inapplicable (nursing home resident or residential care no FQ)'  
-9 = '-9 Missing';
```

```
VALUE RF997DK
```

```
-7 = '-7 RF'  
-8 = '-8 DK'  
-1 = '-1 Inapplicable'  
-9 = '-9 Missing'  
997 = '997 Number of hours vary each week';
```

```
VALUE RFDK_F
```

```
-7 = '-7 RF'  
-8 = '-8 DK'  
-1 = '-1 Inapplicable'  
-9 = '-9 Missing';
```

```
VALUE RFDK_Y
```

```
1 = ' 1 Yes'  
-7 = '-7 RF'  
-8 = '-8 DK'  
-1 = '-1 Inapplicable'  
-9 = '-9 Missing';
```

```
VALUE RFDK_YN
```

```
1 = ' 1 Yes'  
2 = ' 2 No'  
-7 = '-7 RF'  
-8 = '-8 DK'  
-1 = '-1 Inapplicable'  
-9 = '-9 Missing';
```

```
value OCC2010F /*with categories for distribution checking*/
```

```
0010-0430 = "0010-0430 Management Occupations"  
0500-0950 = "0500-0950 Business and Financial Operations Occupations"  
1000-1240 = "1000-1240 Computer and Mathematical Occupations"  
1300-1560 = "1300-1560 Architecture and Engineering Occupations"  
1600-1965 = "1600-1965 Life, Physical, and Social Science Occupations"  
2000-2060 = "2000-2060 Community and Social Service Occupations"  
2100-2160 = "2100-2160 Legal Occupations"  
2200-2550 = "2200-2550 Education, Training, and Library Occupations"
```

## SAS ALGORITHM FOR DEMENTIA

```
    2600-2960 = "2600-2960 Arts, Design, Entertainment, Sports, and Media
Occupations"
    3000-3540 = "3000-3540 Healthcare Practitioners and Technical
Occupations"
    3600-3655 = "3600-3655 Healthcare Support Occupations"
    3700-3955 = "3700-3955 Protective Service Occupations"
    4000-4160 = "4000-4160 Food Preparation and Serving Related
Occupations"
    4200-4250 = "4200-4250 Building and Grounds Cleaning and Maintenance
Occupations"
    4300-4650 = "4300-4650 Personal Care and Service Occupations"
    4700-4965 = "4700-4965 Sales and Related Occupations"
    5000-5940 = "5000-5940 Office and Administrative Support Occupations"
    6000-6130 = "6000-6130 Farming, Fishing, and Forestry Occupations"
    6200-6940 = "6200-6940 Construction and Extraction Occupations"
    7000-7630 = "7000-7630 Installation, Maintenance, and Repair
Occupations"
    7700-8965 = "7700-8965 Production Occupations"
    9000-9750 = "9000-9750 Transportation and Material Moving Occupations"
    9800-9830 = "9800-9830 Military Specific Occupations"
    9920 = "9920 Unemployed, with no work experience in the last 5 years
or earlier or never worked"
    -7 = '-7 RF'
    -8 = '-8 DK'
    -1 = '-1 Inapplicable'
    -9 = '-9 Missing';

value OCC20_F /*with categories for distribution checking*/
  1 = " 1 0010-0430 Management Occupations"
  2 = " 2 0500-0950 Business and Financial Operations Occupations"
  3 = " 3 1000-1240 Computer and Mathematical Occupations"
  4 = " 4 1300-1560 Architecture and Engineering Occupations"
  5 = " 5 1600-1965 Life, Physical, and Social Science Occupations"
  6 = " 6 2000-2060 Community and Social Service Occupations"
  7 = " 7 2100-2160 Legal Occupations"
  8 = " 8 2200-2550 Education, Training, and Library Occupations"
  9 = " 9 2600-2960 Arts, Design, Entertainment, Sports, and Media
Occupations"
 10 = "10 3000-3540 Healthcare Practitioners and Technical
Occupations"
 11 = "11 3600-3655 Healthcare Support Occupations"
 12 = "12 3700-3955 Protective Service Occupations"
 13 = "13 4000-4160 Food Preparation and Serving Related Occupations"
 14 = "14 4200-4250 Building and Grounds Cleaning and Maintenance
Occupations"
 15 = "15 4300-4650 Personal Care and Service Occupations"
 16 = "16 4700-4965 Sales and Related Occupations"
 17 = "17 5000-5940 Office and Administrative Support Occupations"
 18 = "18 6000-6130 Farming, Fishing, and Forestry Occupations"
 19 = "19 6200-6940 Construction and Extraction Occupations"
 20 = "20 7000-7630 Installation, Maintenance, and Repair Occupations"
 21 = "21 7700-8965 Production Occupations"
 22 = "22 9000-9750 Transportation and Material Moving Occupations"
 23 = "23 9800-9830 Military Specific Occupations"
 24 = "24 9920 Unemployed, with no work experience in the last 5 years
or earlier or never worked"
 25 = "25 Blank field"
```

## SAS ALGORITHM FOR DEMENTIA

```

    94 = "94  Uncodeable"
    97 = "97  Never worked entire life"
    98 = "98  Homemaker / raised children"
-7 = '-7 RF'
-8 = '-8 DK'
-1 = '-1 Inapplicable'
-9 = '-9 Missing';

value $OCCF /*with categories for distribution checking*/
    "0010"- "0430" = "0010-0430 Management Occupations"
    "0500"- "0950" = "0500-0950 Business and Financial Operations
Occupations"
    "1000"- "1240" = "1000-1240 Computer and Mathematical Occupations"
    "1300"- "1560" = "1300-1560 Architecture and Engineering Occupations"
    "1600"- "1965" = "1600-1965 Life, Physical, and Social Science
Occupations"
    "2000"- "2060" = "2000-2060 Community and Social Service Occupations"
    "2100"- "2160" = "2100-2160 Legal Occupations"
    "2200"- "2550" = "2200-2550 Education, Training, and Library
Occupations"
    "2600"- "2960" = "2600-2960 Arts, Design, Entertainment, Sports, and
Media Occupations"
    "3000"- "3540" = "3000-3540 Healthcare Practitioners and Technical
Occupations"
    "3600"- "3655" = "3600-3655 Healthcare Support Occupations"
    "3700"- "3955" = "3700-3955 Protective Service Occupations"
    "4000"- "4160" = "4000-4160 Food Preparation and Serving Related
Occupations"
    "4200"- "4250" = "4200-4250 Building and Grounds Cleaning and
Maintenance Occupations"
    "4300"- "4650" = "4300-4650 Personal Care and Service Occupations"
    "4700"- "4965" = "4700-4965 Sales and Related Occupations"
    "5000"- "5940" = "5000-5940 Office and Administrative Support
Occupations"
    "6000"- "6130" = "6000-6130 Farming, Fishing, and Forestry Occupations"
    "6200"- "6940" = "6200-6940 Construction and Extraction Occupations"
    "7000"- "7630" = "7000-7630 Installation, Maintenance, and Repair
Occupations"
    "7700"- "8965" = "7700-8965 Production Occupations"
    "9000"- "9750" = "9000-9750 Transportation and Material Moving
Occupations"
    "9800"- "9830" = "9800-9830 Military Specific Occupations"
    "9920" = "9920 Unemployed, with no work experience in the last 5 years
or earlier or never worked"
-7 = '-7 RF'
-8 = '-8 DK'
-1 = '-1 Inapplicable'
-9 = '-9 Missing';

value OCC_SI /*with categories for distribution checking*/
    11 = '11 Agriculture, Forestry, Fishing and Hunting'
    21 = '21 Mining, Quarrying, and Oil and Gas Extraction'
    22 = '22 Utilities'
    23 = '23 Construction'
    31 = '31-33 Manufacturing'
    32 = '31-33 Manufacturing'
```

## SAS ALGORITHM FOR DEMENTIA

```
33 = '31-33 Manufacturing'  
42 = '42 Wholesale Trade'  
44 = '44-45 Retail Trade'  
45 = '44-45 Retail Trade'  
48 = '48-49 Transportation and Warehousing'  
49 = '48-49 Transportation and Warehousing'  
51 = '51 Information'  
52 = '52 Finance and Insurance'  
53 = '53 Real Estate and Rental and Leasing'  
54 = '54 Professional, Scientific, and Technical Services'  
55 = '55 Management of Companies and Enterprises'  
56 = '56 Administrative and Support and Waste Management and  
Remediation Services'  
61 = '61 Educational Services'  
62 = '62 Health Care and Social Assistance'  
71 = '71 Arts, Entertainment, and Recreation'  
72 = '72 Accommodation and Food Services'  
81 = '81 Other Services (except Public Administration)'  
92 = '92 Public Administration'  
94 = "94 Uncodeable"  
99 = '99 None'  
-7 = '-7 RF'  
-8 = '-8 DK'  
-1 = '-1 Inapplicable'  
-9 = '-9 Missing';
```

### VALUE dnsoc

```
1 = '1 Eligible and interviewed'  
2 = '2 Eligible and not interviewed phone number provided'  
3 = '3 Eligible and not interviewed SP refused'  
4 = '4 Eligible and not interviewed other'  
5 = '5 Eligible and not fielded for NSOC'  
6 = '6 5+ caregivers and not sampled'  
7 = '7 Ineligible'  
-1 = '-1 Inapplicable';
```

### VALUE fdnsoc

```
1 = '1 SP NSOC Eligible'  
-1 = '-1 Inapplicable';
```

### VALUE fdintdys

```
1 = '1 30 days or less'  
2 = '2 31-60 days'  
3 = '3 61-90 days'  
4 = '4 91-120 days'  
5 = '5 121 days or more'  
-1 = '-1 Inapplicable';
```

### VALUE \$fdTRCcd

```
'CO' = 'CO Complete Interview '  
'IE' = 'IE Ineligible Interview'  
'I2' = 'I2 Ineligible - error'  
'I3' = 'I3 Ineligible - other'  
'LH' = 'LH Final Language Problem - Hearing/Speech'  
'LP' = 'LP Final Language Problem'  
'MC' = 'MC Max Call'  
'NA' = 'NA No Answer'
```

## SAS ALGORITHM FOR DEMENTIA

```
'ND'= 'ND Subject deceased'  
'NL'= 'NL Not Locatable'  
'NM'= 'NM No Answer: Answering Machine'  
'NP'= 'NP Not available in Field Period'  
'NS'= 'NS Subject Sick'  
'NX'= 'NX Eligible, not fielded'  
'RB'= 'RB Final refusal'  
'RF'= 'RF Refusal - preload from SP interview'  
'RP'= 'RP Final refusal - inbound call'  
'OO'= 'OO Oth Out of scope- SP deceased';  
  
VALUE inclimfa  
  1= "1 Reported in NSOC I"  
  2= "2 Reported in NHATS R1 (Spouse/partner of SP)"  
  3= "3 Imputed in NSOC I"  
  4= "4 Imputed in NHATS R1 (Spouse/partner of SP)" ;
```

**RUN;**

```
/*=====*/
```

```
/* NSOC_Round_5_Combined_PROC_FORMAT_Statement_V4.sas */
```

**PROC FORMAT;**

```
VALUE $RFDK_F  
  '-7' = '-7 RF'  
  '-8' = '-8 DK'  
  '-1' = '-1 Inapplicable'  
  '-9' = '-9 Missing';  
VALUE RFDK_F  
  -7 = '-7 RF'  
  -8 = '-8 DK'  
  -1 = '-1 Inapplicable'  
  -9 = '-9 Missing';  
VALUE RFDK_Y  
  1 = ' 1 Yes'  
  -7 = '-7 RF'  
  -8 = '-8 DK'  
  -1 = '-1 Inapplicable'  
  -9 = '-9 Missing';  
VALUE W000001W  
  1 = "1 MALE"  
  2 = "2 FEMALE"  
  -7 = '-7 RF'  
  -8 = '-8 DK'  
  -1 = '-1 Inapplicable'  
  -9 = '-9 Missing';  
VALUE W000002W  
  1 = "1 SAMPLE PERSON"  
  2 = "2 SPOUSE/PARTNER"  
  3 = "3 DAUGHTER"  
  4 = "4 SON"  
  5 = "5 DAUGHTER-IN-LAW"  
  6 = "6 SON-IN-LAW"  
  7 = "7 STEPDAUGHTER"  
  8 = "8 STEPSON"
```

## SAS ALGORITHM FOR DEMENTIA

```
9 = "9 SISTER"
10 = "10 BROTHER"
11 = "11 SISTER-IN-LAW"
12 = "12 BROTHER-IN-LAW"
13 = "13 MOTHER"
14 = "14 STEPMOTHER"
15 = "15 MOTHER-IN-LAW"
16 = "16 FATHER"
17 = "17 STEPFATHER"
18 = "18 FATHER-IN-LAW"
19 = "19 GRANDDAUGHTER"
20 = "20 GRANDSON"
21 = "21 NIECE"
22 = "22 NEPHEW"
23 = "23 AUNT"
24 = "24 UNCLE"
25 = "25 COUSIN"
26 = "26 STEPDAUGHTER'S SON/DAUGHTER"
27 = "27 STEPSON'S SON/DAUGHTER"
28 = "28 DAUGHTER-IN-LAW'S SON/DAUGHTER"
29 = "29 SON-IN-LAW'S SON/DAUGHTER"
30 = "30 BOARDER/RENTER"
31 = "31 LIVE-IN HOUSEKEEPER/EMPLOYEE"
32 = "32 ROOMMATE"
33 = "33 EX-WIFE/EX-HUSBAND"
34 = "34 BOYFRIEND/GIRLFIEND"
35 = "35 NEIGHBOR"
36 = "36 FRIEND"
37 = "37 STAFF PERSON AT THE PLACE SP LIVES"
38 = "38 CO-WORKER"
39 = "39 MINISTER, PRIEST, OR OTHER CLERGY"
40 = "40 PSYCHIATRIST, PSYCHOLOGIST, COUNSELOR, OR THERAPIST"
91 = "91 OTHER RELATIVE"
92 = "92 OTHER NONRELATIVE"
-7 = '-7 RF'
-8 = '-8 DK'
-1 = '-1 Inapplicable'
-9 = '-9 Missing';

VALUE W000003W
  1 = "1 White, non-Hispanic"
  2 = "2 Black, non-Hispanic"
  3 = "3 Other (Am Indian/Asian/Native Hawaiian/Pacific Islander/other
specify), non-Hispanic"
  4 = "4 Hispanic"
  5 = "5 More than one and DKRF primary"
  6 = "6 DKRF";

VALUE W000004W
  1 = "1 YES"
  2 = "2 NO"
  -7 = '-7 RF'
  -8 = '-8 DK'
  -1 = '-1 Inapplicable'
  -9 = '-9 Missing';

VALUE W000006W
  1 = "1 30 days or less"
  2 = "2 31-60 days"
  3 = "3 61-90 days"
```

## SAS ALGORITHM FOR DEMENTIA

```
    4 = "4 91-120 days"
    5 = "5 121 days or more"
    -1 = "-1 Inapplicable";
VALUE W000007W
    1 = "1 WHITE or CAUCASIAN"
    2 = "2 BLACK or AFRICAN AMERICAN"
    3 = "3 AMERICAN INDIAN or ALASKA NATIVE"
    4 = "4 ASIAN"
    5 = "5 NATIVE HAWAIIAN or OTHER PACIFIC ISLANDER"
    /*6 = "6 DO NOT HAVE A PRIMARY RACE"*/
    -7 = '-7 RF'
    -8 = '-8 DK'
    -1 = '-1 Inapplicable'
    -9 = '-9 Missing';
VALUE W000008W
    1 = "1 SP NSOC Eligible"
    -1 = '-1 Inapplicable';
VALUE W000009W
    1 = "1 Eligible and interviewed"
    2 = "2 Eligible and not interviewed phone number provided"
    3 = "3 Eligible and not interviewed SP refused"
    4 = "4 Eligible and not interviewed other"
    5 = "5 Eligible and not fielded for NSOC"
    6 = "5+ caregivers and not sampled"
    7 = "7 Ineligible"
    -1 = "-1 Inapplicable";
VALUE W000011W
    997 = "997 NUMBER OF HOURS VARY EACH WEEK"
    -7 = '-7 RF'
    -8 = '-8 DK'
    -1 = '-1 Inapplicable'
    -9 = '-9 Missing';
VALUE W000012W
    1 = "1 EVERY DAY"
    2 = "2 MOST DAYS"
    3 = "3 SOME DAYS"
    4 = "4 RARELY"
    5 = "5 NEVER"
    -7 = '-7 RF'
    -8 = '-8 DK'
    -1 = '-1 Inapplicable'
    -9 = '-9 Missing';
VALUE W000013W
    1 = "1 YES"
    2 = "2 NO"
    7 = "7 SP DOES NOT TAKE ANY PRESCRIBED MEDICINES"
    -7 = '-7 RF'
    -8 = '-8 DK'
    -1 = '-1 Inapplicable'
    -9 = '-9 Missing';
VALUE W000014W
    1 = "1 EVERY DAY"
    2 = "2 MOST DAYS"
    3 = "3 SOME DAYS"
    4 = "4 RARELY"
    -7 = '-7 RF'
    -8 = '-8 DK'
```



## SAS ALGORITHM FOR DEMENTIA

```
-1 = '-1 Inapplicable'
-9 = '-9 Missing';
VALUE W000015W
  1 = "1 A LOT"
  2 = "2 SOMEWHAT"
  3 = "3 A LITTLE"
  4 = "4 NOT AT ALL"
-7 = '-7 RF'
-8 = '-8 DK'
-1 = '-1 Inapplicable'
-9 = '-9 Missing';
VALUE W000016W
  1 = "1 WALK"
  2 = "2 DRIVE"
  3 = "3 SOMEONE DRIVES ME"
  4 = "4 TAXI"
  5 = "5 BUS"
  6 = "6 SUBWAY/TRAIN/LIGHT RAIL"
  7 = "7 TRAIN"
  8 = "8 AIRPLANE/FLY"
  91 = "91 OTHER (SPECIFY)"
-7 = '-7 RF'
-8 = '-8 DK'
-1 = '-1 Inapplicable'
-9 = '-9 Missing';
VALUE W000017W
  1 = "1 MINUTES"
  2 = "2 HOURS"
-7 = '-7 RF'
-8 = '-8 DK'
-1 = '-1 Inapplicable'
-9 = '-9 Missing';
VALUE W000018W
  1 = "1 JANUARY"
  2 = "2 FEBRUARY"
  3 = "3 MARCH"
  4 = "4 APRIL"
  5 = "5 MAY"
  6 = "6 JUNE"
  7 = "7 JULY"
  8 = "8 AUGUST"
  9 = "9 SEPTEMBER"
  10 = "10 OCTOBER"
  11 = "11 NOVEMBER"
  12 = "12 DECEMBER"
-7 = '-7 RF'
-8 = '-8 DK'
-1 = '-1 Inapplicable'
-9 = '-9 Missing';
VALUE W000019W
  1 = "1 REGULAR SCHEDULE"
  2 = "2 VARIED"
-7 = '-7 RF'
-8 = '-8 DK'
-1 = '-1 Inapplicable'
-9 = '-9 Missing';
VALUE W000020W
```

## SAS ALGORITHM FOR DEMENTIA

```
1 = "1 LESS THAN HALF"  
2 = "2 ABOUT HALF"  
3 = "3 MORE THAN HALF"  
4 = "4 NEARLY ALL"  
-7 = '-7 RF'  
-8 = '-8 DK'  
-1 = '-1 Inapplicable'  
-9 = '-9 Missing';  
VALUE W000021W  
1 = "1 NUMBER OF YEARS"  
2 = "2 DATE"  
-7 = '-7 RF'  
-8 = '-8 DK'  
-1 = '-1 Inapplicable'  
-9 = '-9 Missing';  
VALUE W000022W  
1 = "1 A LOT"  
2 = "2 SOME"  
3 = "3 A LITTLE"  
4 = "4 NOT AT ALL"  
-7 = '-7 RF'  
-8 = '-8 DK'  
-1 = '-1 Inapplicable'  
-9 = '-9 Missing';  
VALUE W000023W  
1 = "1 VERY MUCH"  
2 = "2 SOMEWHAT"  
3 = "3 NOT SO MUCH"  
-7 = '-7 RF'  
-8 = '-8 DK'  
-1 = '-1 Inapplicable'  
-9 = '-9 Missing';  
VALUE W000024W  
1 = "1 A LITTLE DIFFICULT"  
2 = "2 "  
3 = "3 "  
4 = "4 "  
5 = "5 VERY DIFFICULT"  
-7 = '-7 RF'  
-8 = '-8 DK'  
-1 = '-1 Inapplicable'  
-9 = '-9 Missing';  
VALUE W000025W  
1 = "1 MORE THAN FAIR SHARE"  
2 = "2 LESS THAN FAIR SHARE"  
3 = "3 FAIR AMOUNT"  
-7 = '-7 RF'  
-8 = '-8 DK'  
-1 = '-1 Inapplicable'  
-9 = '-9 Missing';  
VALUE W000026W  
1 = "1 VERY IMPORTANT"  
2 = "2 SOMEWHAT IMPORTANT"  
3 = "3 NOT SO IMPORTANT"  
-7 = '-7 RF'  
-8 = '-8 DK'  
-1 = '-1 Inapplicable'
```

## SAS ALGORITHM FOR DEMENTIA

```
-9 = '-9 Missing';
VALUE W000027W
  1 = "1 EXCELLENT"
  2 = "2 VERY GOOD"
  3 = "3 GOOD"
  4 = "4 FAIR"
  5 = "5 POOR"
-7 = '-7 RF'
-8 = '-8 DK'
-1 = '-1 Inapplicable'
-9 = '-9 Missing';
VALUE W000028W
  1 = "1 SKIN CANCER"
  2 = "2 BREAST CANCER"
  3 = "3 ^PROSTATE"
  4 = "4 OTHER TYPE OF CANCER (SPECIFY)"
-7 = '-7 RF'
-8 = '-8 DK'
-1 = '-1 Inapplicable'
-9 = '-9 Missing';
VALUE W000029W
  1 = "1 EVERY NIGHT"
  2 = "2 MOST NIGHTS"
  3 = "3 SOME NIGHTS"
  4 = "4 RARELY"
  5 = "5 NEVER"
-7 = '-7 RF'
-8 = '-8 DK'
-1 = '-1 Inapplicable'
-9 = '-9 Missing';
VALUE W000030W
  1 = "1 NOT AT ALL"
  2 = "2 SEVERAL DAYS"
  3 = "3 MORE THAN HALF THE DAYS"
  4 = "4 NEARLY EVERY DAY"
-7 = '-7 RF'
-8 = '-8 DK'
-1 = '-1 Inapplicable'
-9 = '-9 Missing';
VALUE W000031W
  1 = "1 AGREE STRONGLY"
  2 = "2 AGREE SOMEWHAT"
  3 = "3 DISAGREE SOMEWHAT"
  4 = "4 DISAGREE STRONGLY"
-7 = '-7 RF'
-8 = '-8 DK'
-1 = '-1 Inapplicable'
-9 = '-9 Missing';
VALUE W000032W
  1 = "1 MARRIED"
  2 = "2 LIVING WITH A PARTNER"
  3 = "3 SEPARATED"
  4 = "4 DIVORCED"
  5 = "5 WIDOWED"
  6 = "6 NEVER MARRIED"
-7 = '-7 RF'
-8 = '-8 DK'
```

## SAS ALGORITHM FOR DEMENTIA

```
-1 = '-1 Inapplicable'
-9 = '-9 Missing';
VALUE W000033W
  1 = "1 NO SCHOOLING COMPLETED"
  2 = "2 1ST-8TH GRADE"
  3 = "3 9TH-12TH GRADE (NO DIPLOMA)"
  4 = "4 HIGH SCHOOL GRADUATE (HIGH SCHOOL DIPLOMA OR EQUIVALENT)"
  5 = "5 VOCATIONAL, TECHNICAL, BUSINESS, OR TRADE SCHOOL CERTIFICATE OR
DIPLOMA (BEYOND HIGH SCHOOL LEVEL)"
  6 = "6 SOME COLLEGE BUT NO DEGREE"
  7 = "7 ASSOCIATE'S DEGREE"
  8 = "8 BACHELOR'S DEGREE"
  9 = "9 MASTER'S, PROFESSIONAL, OR DOCTORAL DEGREE"
-7 = '-7 RF'
-8 = '-8 DK'
-1 = '-1 Inapplicable'
-9 = '-9 Missing';
VALUE W000034W
  1 = "1 YES"
  2 = "2 NO"
  3 = "3 RETIRED/DON'T WORK ANYMORE"
-7 = '-7 RF'
-8 = '-8 DK'
-1 = '-1 Inapplicable'
-9 = '-9 Missing';
VALUE W000035W
  1 = "1 YES, LOOKING FOR A JOB"
  2 = "2 YES, ON LAYOFF"
  3 = "3 NO"
  4 = "4 RETIRED/DON'T WORK ANYMORE"
-7 = '-7 RF'
-8 = '-8 DK'
-1 = '-1 Inapplicable'
-9 = '-9 Missing';
VALUE W000036W
  1 = "1 DAYTIME"
  2 = "2 SOME OTHER SCHEDULE"
-7 = '-7 RF'
-8 = '-8 DK'
-1 = '-1 Inapplicable'
-9 = '-9 Missing';
VALUE W000037W
  1 = "1 ENTER NUMBER OF HOURS"
  2 = "2 ENTER NUMBER OF DAYS"
-7 = '-7 RF'
-8 = '-8 DK'
-1 = '-1 Inapplicable'
-9 = '-9 Missing';
VALUE W000038W
  1 = "1 8-HOUR DAYS"
  2 = "2 SOMETHING LESS"
  3 = "3 SOMETHING MORE"
-7 = '-7 RF'
-8 = '-8 DK'
-1 = '-1 Inapplicable'
-9 = '-9 Missing';
VALUE W000039W
```

## SAS ALGORITHM FOR DEMENTIA

```
1 = "1 ENTER OCCUPATION"
2 = "2 ^CurrentOccupationSame"
97 = "97 NEVER WORKED ENTIRE LIFE"
98 = "98 HOMEMAKER/RAISED CHILDREN/WORKED IN THE HOME"
-7 = '-7 RF'
-8 = '-8 DK'
-1 = '-1 Inapplicable'
-9 = '-9 Missing';
VALUE W000040W
1 = "1 MEDICARE"
2 = "2 MEDICAID"
3 = "3 PRIVATE HEALTH INSURANCE"
4 = "4 TRICARE/CHAMPVA"
91 = "91 OTHER (SPECIFY)"
-7 = '-7 RF'
-8 = '-8 DK'
-1 = '-1 Inapplicable'
-9 = '-9 Missing';
VALUE W000041W
1 = "1 LESS THAN"
2 = "2 MORE THAN"
-7 = '-7 RF'
-8 = '-8 DK'
-1 = '-1 Inapplicable'
-9 = '-9 Missing';
VALUE W000042W
1 = "1 MORE THAN $1,000"
2 = "2 LESS THAN $1,000"
-7 = '-7 RF'
-8 = '-8 DK'
-1 = '-1 Inapplicable'
-9 = '-9 Missing';
VALUE W000043W
1 = "1 MORE THAN $500"
2 = "2 LESS THAN $500"
-7 = '-7 RF'
-8 = '-8 DK'
-1 = '-1 Inapplicable'
-9 = '-9 Missing';
VALUE OCC_CODE
1 = '1 Management Occupations: 0010-0430'
2 = '2 Business and Financial Operations Occupations: 0500-0950'
3 = '3 Computer and mathematical occupations: 1000-1240'
4 = '4 Architecture and Engineering Occupations: 1300-1560'
5 = '5 Life, Physical, and Social Science Occupations: 1600-1965'
6 = '6 Community and Social Service Occupations: 2000-2060'
7 = '7 Legal Occupations: 2100-2160'
8 = '8 Education, Training, and Library Occupations: 2200-2550'
9 = '9 Arts, Design, Entertainment, Sports, and Media Occupations: 2600-2960'
10 = '10 Healthcare Practitioners and Technical Occupations: 3000-3540'
11 = '11 Healthcare Support Occupations: 3600-3655'
12 = '12 Protective Service Occupations: 3700-3955'
13 = '13 Food Preparation and Serving Related Occupations: 4000-4160'
14 = '14 Building and Grounds Cleaning and Maintenance Occupations: 4200-4250'
15 = '15 Personal Care and Service Occupations: 4300-4650'
```

## SAS ALGORITHM FOR DEMENTIA

```
16 = '16 Sales and Related Occupations: 4700-4965'
17 = '17 Office and Administrative Support Occupations: 5000-5940'
18 = '18 Farming, Fishing, and Forestry Occupations: 6000-6130'
19 = '19 Construction and Extraction Occupations: 6200-6940'
20 = '20 Installation, Maintenance, and Repair Occupations: 7000-7630'
21 = '21 Production Occupations: 7700-8965'
22 = '22 Transportation and Material Moving Occupations: 9000-9750'
23 = '23 Military Specific Occupations: 9800-9830'
24 = '24 No current occ (Unemployed, no work in the last 5 years, never
worked): 9920'
25 = '25 Blank field'
26 = '26 Code did not match'
94 = '94 Uncodable'
95 = '95 Never Worked Entire Life'
96 = '96 Homemaker/Raised Children'
-7 = '-7 RF'
-8 = '-8 DK'
-1 = '-1 Inapplicable'
-9 = '-9 Missing';
    value OCC_SI /*with categories for distribution checking*/
        11 = '11 Agriculture, Forestry, Fishing and Hunting'
        21 = '21 Mining, Quarrying, and Oil and Gas Extraction'
        22 = '22 Utilities'
        23 = '23 Construction'
        31 = '31-33 Manufacturing'
        32 = '31-33 Manufacturing'
        33 = '31-33 Manufacturing'
        42 = '42 Wholesale Trade'
        44 = '44-45 Retail Trade'
        45 = '44-45 Retail Trade'
        48 = '48-49 Transportation and Warehousing'
        49 = '48-49 Transportation and Warehousing'
        51 = '51 Information'
        52 = '52 Finance and Insurance'
        53 = '53 Real Estate and Rental and Leasing'
        54 = '54 Professional, Scientific, and Technical Services'
        55 = '55 Management of Companies and Enterprises'
        56 = '56 Administrative and Support and Waste Management and
Remediation Services'
        61 = '61 Educational Services'
        62 = '62 Health Care and Social Assistance'
        71 = '71 Arts, Entertainment, and Recreation'
        72 = '72 Accommodation and Food Services'
        81 = '81 Other Services (except Public Administration)'
        92 = '92 Public Administration'
        94 = "94 Uncodeable"
        99 = '99 None'
    -7 = '-7 RF'
    -8 = '-8 DK'
    -1 = '-1 Inapplicable'
    -9 = '-9 Missing';
    value Source /* from derived variable specifications...updated 11/30/18
*/
        1 = '1 2017 NSOC'
        2 = '2 2015 NSOC - phone interview'
        3 = '3 2015 NSOC - mailing'
        4 = '4 2015 NHATS'
```

## SAS ALGORITHM FOR DEMENTIA

```
    5 = '5 No source'
   -7 = '-7 RF'
   -8 = '-8 DK'
   -1 = '-1 Inapplicable'
   -9 = '-9 Missing';

VALUE inc5imfa
  1 ="1 Reported in NSOC II"
  2 ="2 Reported in NHATS R5 (Spouse/partner of SP)"
  3 ="3 Imputed in NSOC II"
  4 ="4 Imputed in NHATS R5 (Spouse/partner of SP)";

RUN;

/*=====*/
/* NSOC_R7_Crss_Combined_PROC_FORMAT_Statement_V2.sas */
options extendobscounter=no nofmterr;

PROC FORMAT;
  VALUE $RFDK_F
    '-7' = '-7 RF'
    '-8' = '-8 DK'
    '-1' = '-1 Inapplicable'
    '-9' = '-9 Missing'
;
  VALUE RFDK_F
    -2 = '-2 Helped last month, SP alive'
    -3 = '-3 Helped last month of life, SP deceased'
    -4 = '-4 Did not help last month or in last month of life'
    -7 = '-7 RF'
    -8 = '-8 DK'
    -1 = '-1 Inapplicable'
    -9 = '-9 Missing'
;
  VALUE RFDK_S
    997 = '997 Hours vary each week'
    -2 = '-2 Helped last month, SP alive'
    -3 = '-3 Helped last month of life, SP deceased'
    -4 = '-4 Did not help last month or in last month of life'
    -7 = '-7 RF'
    -8 = '-8 DK'
    -1 = '-1 Inapplicable'
    -9 = '-9 Missing'
;
  VALUE RFDK_Y
    1 = ' 1 Yes'
    -7 = '-7 RF'
    -8 = '-8 DK'
    -1 = '-1 Inapplicable'
    -9 = '-9 Missing'
;

VALUE W000001W
```

## SAS ALGORITHM FOR DEMENTIA

```
1 = "1 YES"
2 = "2 NO"
-2 = '-2 Helped last month, SP alive'
-3 = '-3 Helped last month of life, SP deceased'
-4 = '-4 Did not help last month or in last month of life'
-7 = '-7 RF'
-8 = '-8 DK'
-1 = '-1 Inapplicable'
-9 = '-9 Missing'
;

VALUE W000002W
1 = "1 MALE"
2 = "2 FEMALE"
-2 = '-2 Helped last month, SP alive'
-3 = '-3 Helped last month of life, SP deceased'
-4 = '-4 Did not help last month or in last month of life'
-7 = '-7 RF'
-8 = '-8 DK'
-1 = '-1 Inapplicable'
-9 = '-9 Missing'
;

VALUE W000003W
1 = "1 SAMPLE PERSON"
2 = "2 SPOUSE/PARTNER"
3 = "3 DAUGHTER"
4 = "4 SON"
5 = "5 DAUGHTER-IN-LAW"
6 = "6 SON-IN-LAW"
7 = "7 STEPDAUGHTER"
8 = "8 STEPSON"
9 = "9 SISTER"
10 = "10 BROTHER"
11 = "11 SISTER-IN-LAW"
12 = "12 BROTHER-IN-LAW"
13 = "13 MOTHER"
14 = "14 STEPMOTHER"
15 = "15 MOTHER-IN-LAW"
16 = "16 FATHER"
17 = "17 STEPFATHER"
18 = "18 FATHER-IN-LAW"
19 = "19 GRANDDAUGHTER"
20 = "20 GRANDSON"
21 = "21 NIECE"
22 = "22 NEPHEW"
23 = "23 AUNT"
24 = "24 UNCLE"
25 = "25 COUSIN"
26 = "26 STEPDAUGHTER'S SON/DAUGHTER"
27 = "27 STEPSON'S SON/DAUGHTER"
28 = "28 DAUGHTER-IN-LAW'S SON/DAUGHTER"
29 = "29 SON-IN-LAW'S SON/DAUGHTER"
30 = "30 BOARDER/RENTER"
31 = "31 LIVE-IN HOUSEKEEPER/EMPLOYEE"
32 = "32 ROOMMATE"
33 = "33 EX-WIFE/EX-HUSBAND"
34 = "34 BOYFRIEND/GIRLFIEND"
```



## SAS ALGORITHM FOR DEMENTIA

```
35 = "35 NEIGHBOR"
36 = "36 FRIEND"
37 = "37 STAFF PERSON AT THE PLACE SP LIVES"
38 = "38 CO-WORKER"
39 = "39 MINISTER, PRIEST, OR OTHER CLERGY"
40 = "40 PSYCHIATRIST, PSYCHOLOGIST, COUNSELOR, OR THERAPIST"
91 = "91 OTHER RELATIVE"
92 = "92 OTHER NONRELATIVE"
-2 = '-2 Helped last month, SP alive'
-3 = '-3 Helped last month of life, SP deceased'
-4 = '-4 Did not help last month or in last month of life'
-7 = '-7 RF'
-8 = '-8 DK'
-1 = '-1 Inapplicable'
-9 = '-9 Missing'
;

VALUE W000004W
1 = "1 White, non-Hispanic"
2 = "2 Black, non-Hispanic"
3 = "3 Other (Am Indian/Asian/Native Hawaiian/Pacific Islander/other
specify), non-Hispanic"
4 = "4 Hispanic"
5 = "5 More than one and DKRF primary"
6 = "6 DKRF"
-2 = '-2 Helped last month, SP alive'
-3 = '-3 Helped last month of life, SP deceased'
-4 = '-4 Did not help last month or in last month of life'
-7 = '-7 RF'
-8 = '-8 DK'
-1 = '-1 Inapplicable'
-9 = '-9 Missing'
;

VALUE W000005W
1='1 Yes - Breakoff'
-2 = '-2 Helped last month, SP alive'
-3 = '-3 Helped last month of life, SP deceased'
-4 = '-4 Did not help last month or in last month of life'
-7 = '-7 RF'
-8 = '-8 DK'
-1 = '-1 Inapplicable'
-9 = '-9 Missing'
;

VALUE W000006W
1 = '1 30 days or less'
2 = '2 31-60 days'
3 = '3 61-90 days'
4 = '4 91-120 days'
5 = '5 121 days or more'
-2 = '-2 Helped last month, SP alive'
-3 = '-3 Helped last month of life, SP deceased'
-4 = '-4 Did not help last month or in last month of life'
-7 = '-7 RF'
-8 = '-8 DK'
```

## SAS ALGORITHM FOR DEMENTIA

```
-1 = '-1 Inapplicable'
-9 = '-9 Missing'
;
VALUE W000013W
  1 = "1 YES"
  2 = "2 NO"
  7 = "7 SP DOES NOT TAKE ANY PRESCRIBED MEDICINES"
-2 = '-2 Helped last month, SP alive'
-3 = '-3 Helped last month of life, SP deceased'
-4 = '-4 Did not help last month or in last month of life'
-7 = '-7 RF'
-8 = '-8 DK'
-1 = '-1 Inapplicable'
-9 = '-9 Missing'
;
VALUE W000014W
  2 = "2 Helped last month, SP alive"
  3 = "3 Helped last month of life, SP deceased"
  4 = "4 Did not help last month or in last month of life"
-2 = '-2 Helped last month, SP alive'
-3 = '-3 Helped last month of life, SP deceased'
-4 = '-4 Did not help last month or in last month of life'
-7 = '-7 RF'
-8 = '-8 DK'
-1 = '-1 Inapplicable'
-9 = '-9 Missing'
;
VALUE W000017W
  1 = "1 EVERY DAY"
  2 = "2 MOST DAYS"
  3 = "3 SOME DAYS"
  4 = "4 RARELY"
  5 = "5 NEVER"
-2 = '-2 Helped last month, SP alive'
-3 = '-3 Helped last month of life, SP deceased'
-4 = '-4 Did not help last month or in last month of life'
-7 = '-7 RF'
-8 = '-8 DK'
-1 = '-1 Inapplicable'
-9 = '-9 Missing'
;
VALUE W000018W
  1 = "1 JANUARY"
  2 = "2 FEBRUARY"
  3 = "3 MARCH"
  4 = "4 APRIL"
  5 = "5 MAY"
  6 = "6 JUNE"
  7 = "7 JULY"
  8 = "8 AUGUST"
  9 = "9 SEPTEMBER"
 10 = "10 OCTOBER"
 11 = "11 NOVEMBER"
 12 = "12 DECEMBER"
-2 = '-2 Helped last month, SP alive'
-3 = '-3 Helped last month of life, SP deceased'
```

## SAS ALGORITHM FOR DEMENTIA

```
-4 = '-4 Did not help last month or in last month of life'  
-7 = '-7 RF'  
-8 = '-8 DK'  
-1 = '-1 Inapplicable'  
-9 = '-9 Missing';
```

```
VALUE W000019W
```

```
1 = "1 EVERY DAY"  
2 = "2 MOST DAYS"  
3 = "3 SOME DAYS"  
4 = "4 RARELY"  
-2 = '-2 Helped last month, SP alive'  
-3 = '-3 Helped last month of life, SP deceased'  
-4 = '-4 Did not help last month or in last month of life'  
-7 = '-7 RF'  
-8 = '-8 DK'  
-1 = '-1 Inapplicable'  
-9 = '-9 Missing'
```

```
;
```

```
VALUE W000020W
```

```
1 = "1 YES"  
2 = "2 NO OR NOT ENOUGH"  
-2 = '-2 Helped last month, SP alive'  
-3 = '-3 Helped last month of life, SP deceased'  
-4 = '-4 Did not help last month or in last month of life'  
-7 = '-7 RF'  
-8 = '-8 DK'  
-1 = '-1 Inapplicable'  
-9 = '-9 Missing'
```

```
;
```

```
VALUE W000021W
```

```
1 = "1 REGULAR SCHEDULE"  
2 = "2 VARIED"  
-2 = '-2 Helped last month, SP alive'  
-3 = '-3 Helped last month of life, SP deceased'  
-4 = '-4 Did not help last month or in last month of life'  
-7 = '-7 RF'  
-8 = '-8 DK'  
-1 = '-1 Inapplicable'  
-9 = '-9 Missing'
```

```
;
```

```
VALUE W000022W
```

```
1 = "1 LESS THAN HALF"  
2 = "2 ABOUT HALF"  
3 = "3 MORE THAN HALF"  
4 = "4 NEARLY ALL"  
-2 = '-2 Helped last month, SP alive'  
-3 = '-3 Helped last month of life, SP deceased'  
-4 = '-4 Did not help last month or in last month of life'  
-7 = '-7 RF'  
-8 = '-8 DK'  
-1 = '-1 Inapplicable'  
-9 = '-9 Missing'
```

```
;
```

## SAS ALGORITHM FOR DEMENTIA

```
VALUE W000023W
  1 = "1 NUMBER OF YEARS"
  2 = "2 DATE"
  -2 = '-2 Helped last month, SP alive'
  -3 = '-3 Helped last month of life, SP deceased'
  -4 = '-4 Did not help last month or in last month of life'
  -7 = '-7 RF'
  -8 = '-8 DK'
  -1 = '-1 Inapplicable'
  -9 = '-9 Missing'
```

;

```
VALUE W000024W
  1 = "1 A LOT"
  2 = "2 SOME"
  3 = "3 A LITTLE"
  4 = "4 NOT AT ALL"
  -2 = '-2 Helped last month, SP alive'
  -3 = '-3 Helped last month of life, SP deceased'
  -4 = '-4 Did not help last month or in last month of life'
  -7 = '-7 RF'
  -8 = '-8 DK'
  -1 = '-1 Inapplicable'
  -9 = '-9 Missing'
```

;

```
VALUE W000025W
  1 = "1 VERY MUCH"
  2 = "2 SOMEWHAT"
  3 = "3 NOT SO MUCH"
  -2 = '-2 Helped last month, SP alive'
  -3 = '-3 Helped last month of life, SP deceased'
  -4 = '-4 Did not help last month or in last month of life'
  -7 = '-7 RF'
  -8 = '-8 DK'
  -1 = '-1 Inapplicable'
  -9 = '-9 Missing'
```

;

```
VALUE W000026W
  1 = "1 A LITTLE DIFFICULT"
  2 = "2 "
  3 = "3 "
  4 = "4 "
  5 = "5 VERY DIFFICULT"
  -2 = '-2 Helped last month, SP alive'
  -3 = '-3 Helped last month of life, SP deceased'
  -4 = '-4 Did not help last month or in last month of life'
  -7 = '-7 RF'
  -8 = '-8 DK'
  -1 = '-1 Inapplicable'
  -9 = '-9 Missing'
```

;

```
VALUE W000027W
```

## SAS ALGORITHM FOR DEMENTIA

```
1 = "1 VERY DIFFICULT"
2 = "2 SOMEWHAT DIFFICULT"
3 = "3 A LITTLE DIFFICULT"
4 = "4 NOT AT ALL DIFFICULT"
-2 = '-2 Helped last month, SP alive'
-3 = '-3 Helped last month of life, SP deceased'
-4 = '-4 Did not help last month or in last month of life'
-7 = '-7 RF'
-8 = '-8 DK'
-1 = '-1 Inapplicable'
-9 = '-9 Missing'
;
VALUE W000028W
1 = "1 MORE THAN FAIR SHARE"
2 = "2 LESS THAN FAIR SHARE"
3 = "3 FAIR AMOUNT"
-2 = '-2 Helped last month, SP alive'
-3 = '-3 Helped last month of life, SP deceased'
-4 = '-4 Did not help last month or in last month of life'
-7 = '-7 RF'
-8 = '-8 DK'
-1 = '-1 Inapplicable'
-9 = '-9 Missing'
;
VALUE W000029W
1 = "1 YES"
2 = "2 NO OR NOT ENOUGH"
3 = "3 DOES NOT APPLY"
-2 = '-2 Helped last month, SP alive'
-3 = '-3 Helped last month of life, SP deceased'
-4 = '-4 Did not help last month or in last month of life'
-7 = '-7 RF'
-8 = '-8 DK'
-1 = '-1 Inapplicable'
-9 = '-9 Missing'
;
VALUE W000030W
1 = "1 ALWAYS"
2 = "2 USUALLY"
3 = "3 SOMETIMES"
4 = "4 NEVER"
5 = "5 DOES NOT APPLY"
-2 = '-2 Helped last month, SP alive'
-3 = '-3 Helped last month of life, SP deceased'
-4 = '-4 Did not help last month or in last month of life'
-7 = '-7 RF'
-8 = '-8 DK'
-1 = '-1 Inapplicable'
-9 = '-9 Missing'
;
VALUE W000031W
1 = "1 OFTEN"
2 = "2 SOMETIMES"
3 = "3 RARELY"
-2 = '-2 Helped last month, SP alive'
-3 = '-3 Helped last month of life, SP deceased'
```

## SAS ALGORITHM FOR DEMENTIA

```
-4 = '-4 Did not help last month or in last month of life'  
-7 = '-7 RF'  
-8 = '-8 DK'  
-1 = '-1 Inapplicable'  
-9 = '-9 Missing'  
;  
  
VALUE W000032W  
  1 = "1 A LOT"  
  2 = "2 SOMEWHAT"  
  3 = "3 A LITTLE"  
  4 = "4 NOT AT ALL"  
-2 = '-2 Helped last month, SP alive'  
-3 = '-3 Helped last month of life, SP deceased'  
-4 = '-4 Did not help last month or in last month of life'  
-7 = '-7 RF'  
-8 = '-8 DK'  
-1 = '-1 Inapplicable'  
-9 = '-9 Missing'  
;  
  
VALUE W000033W  
  1 = "1 USUAL PROVIDER "  
  2 = "2 SOMEONE ELSE"  
-2 = '-2 Helped last month, SP alive'  
-3 = '-3 Helped last month of life, SP deceased'  
-4 = '-4 Did not help last month or in last month of life'  
-7 = '-7 RF'  
-8 = '-8 DK'  
-1 = '-1 Inapplicable'  
-9 = '-9 Missing'  
;  
  
VALUE W000034W  
  1 = "1 ALWAYS"  
  2 = "2 USUALLY"  
  3 = "3 SOMETIMES"  
  4 = "4 NEVER"  
-2 = '-2 Helped last month, SP alive'  
-3 = '-3 Helped last month of life, SP deceased'  
-4 = '-4 Did not help last month or in last month of life'  
-7 = '-7 RF'  
-8 = '-8 DK'  
-1 = '-1 Inapplicable'  
-9 = '-9 Missing'  
;  
  
VALUE W000035W  
  1 = "1 SP'S HOME"  
  2 = "2 ANOTHER FACILITY"  
  3 = "3 RESPONDENT'S HOME"  
 91 = "91 ANOTHER PLACE (SPECIFY)"  
-2 = '-2 Helped last month, SP alive'  
-3 = '-3 Helped last month of life, SP deceased'  
-4 = '-4 Did not help last month or in last month of life'  
-7 = '-7 RF'
```

## SAS ALGORITHM FOR DEMENTIA

```
-8 = '-8 DK'  
-1 = '-1 Inapplicable'  
-9 = '-9 Missing'  
;  
  
VALUE W000036W  
  1 = "1 WALK/WALKED"  
  2 = "2 DRIVE/DROVE"  
  3 = "3 SOMEONE DRIVES/DROVE ME"  
  4 = "4 TAXI/UBER/LYFT"  
  5 = "5 BUS"  
  6 = "6 SUBWAY/LIGHTRAIL"  
  7 = "7 TRAIN"  
  8 = "8 AIRPLANE/FLY/FLEW"  
 91 = "91 OTHER (SPECIFY)"  
-2 = '-2 Helped last month, SP alive'  
-3 = '-3 Helped last month of life, SP deceased'  
-4 = '-4 Did not help last month or in last month of life'  
-7 = '-7 RF'  
-8 = '-8 DK'  
-1 = '-1 Inapplicable'  
-9 = '-9 Missing'  
;  
  
VALUE W000037W  
  1 = "1 MINUTES"  
  2 = "2 HOURS"  
-2 = '-2 Helped last month, SP alive'  
-3 = '-3 Helped last month of life, SP deceased'  
-4 = '-4 Did not help last month or in last month of life'  
-7 = '-7 RF'  
-8 = '-8 DK'  
-1 = '-1 Inapplicable'  
-9 = '-9 Missing'  
;  
  
VALUE W000038W  
  1 = "1 VERY IMPORTANT"  
  2 = "2 SOMEWHAT IMPORTANT"  
  3 = "3 NOT SO IMPORTANT"  
-2 = '-2 Helped last month, SP alive'  
-3 = '-3 Helped last month of life, SP deceased'  
-4 = '-4 Did not help last month or in last month of life'  
-7 = '-7 RF'  
-8 = '-8 DK'  
-1 = '-1 Inapplicable'  
-9 = '-9 Missing'  
;  
  
VALUE W000039W  
  1 = "1 EXCELLENT"  
  2 = "2 VERY GOOD"  
  3 = "3 GOOD"  
  4 = "4 FAIR"  
  5 = "5 POOR"  
-2 = '-2 Helped last month, SP alive'  
-3 = '-3 Helped last month of life, SP deceased'
```

## SAS ALGORITHM FOR DEMENTIA

```
-4 = '-4 Did not help last month or in last month of life'  
-7 = '-7 RF'  
-8 = '-8 DK'  
-1 = '-1 Inapplicable'  
-9 = '-9 Missing'
```

;

VALUE W000041W

```
1 = "1 EVERY NIGHT"  
2 = "2 MOST NIGHTS"  
3 = "3 SOME NIGHTS"  
4 = "4 RARELY"  
5 = "5 NEVER"  
-2 = '-2 Helped last month, SP alive'  
-3 = '-3 Helped last month of life, SP deceased'  
-4 = '-4 Did not help last month or in last month of life'  
-7 = '-7 RF'  
-8 = '-8 DK'  
-1 = '-1 Inapplicable'  
-9 = '-9 Missing'
```

;

VALUE W000042W

```
1 = "1 NOT AT ALL"  
2 = "2 SEVERAL DAYS"  
3 = "3 MORE THAN HALF THE DAYS"  
4 = "4 NEARLY EVERY DAY"  
-2 = '-2 Helped last month, SP alive'  
-3 = '-3 Helped last month of life, SP deceased'  
-4 = '-4 Did not help last month or in last month of life'  
-7 = '-7 RF'  
-8 = '-8 DK'  
-1 = '-1 Inapplicable'  
-9 = '-9 Missing'
```

;

VALUE W000043W

```
1 = "1 AGREE STRONGLY"  
2 = "2 AGREE SOMEWHAT"  
3 = "3 DISAGREE SOMEWHAT"  
4 = "4 DISAGREE STRONGLY"  
-2 = '-2 Helped last month, SP alive'  
-3 = '-3 Helped last month of life, SP deceased'  
-4 = '-4 Did not help last month or in last month of life'  
-7 = '-7 RF'  
-8 = '-8 DK'  
-1 = '-1 Inapplicable'  
-9 = '-9 Missing'
```

;

VALUE W000044W

```
1 = "1 MARRIED"  
2 = "2 LIVING WITH A PARTNER"  
3 = "3 SEPARATED"
```



## SAS ALGORITHM FOR DEMENTIA

```
4 = "4 DIVORCED"  
5 = "5 WIDOWED"  
6 = "6 NEVER MARRIED"  
-2 = '-2 Helped last month, SP alive'  
-3 = '-3 Helped last month of life, SP deceased'  
-4 = '-4 Did not help last month or in last month of life'  
-7 = '-7 RF'  
-8 = '-8 DK'  
-1 = '-1 Inapplicable'  
-9 = '-9 Missing'
```

;

```
VALUE W000045W  
1 = "1 NO SCHOOLING COMPLETED"  
2 = "2 1ST-8TH GRADE"  
3 = "3 9TH-12TH GRADE (NO DIPLOMA)"  
4 = "4 HIGH SCHOOL GRADUATE (HIGH SCHOOL DIPLOMA OR EQUIVALENT)"  
5 = "5 VOCATIONAL, TECHNICAL, BUSINESS, OR TRADE SCHOOL CERTIFICATE OR  
DIPLOMA (BEYOND HIGH SCHOOL LEVEL)"  
6 = "6 SOME COLLEGE BUT NO DEGREE"  
7 = "7 ASSOCIATE'S DEGREE"  
8 = "8 BACHELOR'S DEGREE"  
9 = "9 MASTER'S, PROFESSIONAL, OR DOCTORAL DEGREE"  
-2 = '-2 Helped last month, SP alive'  
-3 = '-3 Helped last month of life, SP deceased'  
-4 = '-4 Did not help last month or in last month of life'  
-7 = '-7 RF'  
-8 = '-8 DK'  
-1 = '-1 Inapplicable'  
-9 = '-9 Missing'
```

;

```
VALUE W000046W  
1 = "1 WHITE/CAUCASIAN"  
2 = "2 BLACK/AFRICAN AMERICAN"  
3 = "3 AMERICAN INDIAN/ALASKA NATIVE"  
4 = "4 ASIAN"  
5 = "5 NATIVE HAWAIIAN/PACIFIC ISLANDER"  
-2 = '-2 Helped last month, SP alive'  
-3 = '-3 Helped last month of life, SP deceased'  
-4 = '-4 Did not help last month or in last month of life'  
-7 = '-7 RF'  
-8 = '-8 DK'  
-1 = '-1 Inapplicable'  
-9 = '-9 Missing'
```

;

```
VALUE W000047W  
1 = "1 YES"  
2 = "2 NO"  
3 = "3 RETIRED/DON'T WORK ANYMORE"  
-2 = '-2 Helped last month, SP alive'  
-3 = '-3 Helped last month of life, SP deceased'  
-4 = '-4 Did not help last month or in last month of life'
```

## SAS ALGORITHM FOR DEMENTIA

```
-7 = '-7 RF'  
-8 = '-8 DK'  
-1 = '-1 Inapplicable'  
-9 = '-9 Missing'
```

;

VALUE W000048W

```
1 = "1 YES, LOOKING FOR A JOB"  
2 = "2 YES, ON LAYOFF"  
3 = "3 NO"  
4 = "4 RETIRED/DON'T WORK ANYMORE"  
-2 = '-2 Helped last month, SP alive'  
-3 = '-3 Helped last month of life, SP deceased'  
-4 = '-4 Did not help last month or in last month of life'  
-7 = '-7 RF'  
-8 = '-8 DK'  
-1 = '-1 Inapplicable'  
-9 = '-9 Missing'
```

;

VALUE W000049W

```
1 = "1 DAYTIME"  
2 = "2 SOME OTHER SCHEDULE"  
-2 = '-2 Helped last month, SP alive'  
-3 = '-3 Helped last month of life, SP deceased'  
-4 = '-4 Did not help last month or in last month of life'  
-7 = '-7 RF'  
-8 = '-8 DK'  
-1 = '-1 Inapplicable'  
-9 = '-9 Missing'
```

;

VALUE W000050W

```
1 = "1 ENTER NUMBER OF HOURS"  
2 = "2 ENTER NUMBER OF DAYS"  
-2 = '-2 Helped last month, SP alive'  
-3 = '-3 Helped last month of life, SP deceased'  
-4 = '-4 Did not help last month or in last month of life'  
-7 = '-7 RF'  
-8 = '-8 DK'  
-1 = '-1 Inapplicable'  
-9 = '-9 Missing'
```

;

VALUE W000051W

```
1 = "1 8-HOUR DAYS"  
2 = "2 SOMETHING LESS"  
3 = "3 SOMETHING MORE"  
-2 = '-2 Helped last month, SP alive'  
-3 = '-3 Helped last month of life, SP deceased'  
-4 = '-4 Did not help last month or in last month of life'  
-7 = '-7 RF'  
-8 = '-8 DK'
```

## SAS ALGORITHM FOR DEMENTIA

```
-1 = '-1 Inapplicable'  
-9 = '-9 Missing'  
  
;  
  
VALUE W000052W  
  1 = "1 ENTER OCCUPATION"  
  2 = "2 CURRENT OCCUPATION SAME"  
 97 = "97 NEVER WORKED ENTIRE LIFE"  
 98 = "98 HOMEMAKER/RAISED CHILDREN/WORKED IN THE HOME"  
-2 = '-2 Helped last month, SP alive'  
-3 = '-3 Helped last month of life, SP deceased'  
-4 = '-4 Did not help last month or in last month of life'  
-7 = '-7 RF'  
-8 = '-8 DK'  
-1 = '-1 Inapplicable'  
-9 = '-9 Missing'  
  
;  
  
VALUE W000053W  
  1 = "1 MEDICARE"  
  2 = "2 MEDICAID"  
  3 = "3 PRIVATE HEALTH INSURANCE"  
  4 = "4 TRICARE/CHAMPVA"  
 91 = "91 OTHER (SPECIFY)"  
-2 = '-2 Helped last month, SP alive'  
-3 = '-3 Helped last month of life, SP deceased'  
-4 = '-4 Did not help last month or in last month of life'  
-7 = '-7 RF'  
-8 = '-8 DK'  
-1 = '-1 Inapplicable'  
-9 = '-9 Missing'  
  
;  
  
VALUE W000054W  
  1 = "1 LESS THAN"  
  2 = "2 MORE THAN"  
-2 = '-2 Helped last month, SP alive'  
-3 = '-3 Helped last month of life, SP deceased'  
-4 = '-4 Did not help last month or in last month of life'  
-7 = '-7 RF'  
-8 = '-8 DK'  
-1 = '-1 Inapplicable'  
-9 = '-9 Missing'  
  
;  
  
VALUE W000055W  
  1 = "1 MORE THAN $1,000"  
  2 = "2 LESS THAN $1,000"  
-2 = '-2 Helped last month, SP alive'  
-3 = '-3 Helped last month of life, SP deceased'  
-4 = '-4 Did not help last month or in last month of life'  
-7 = '-7 RF'  
-8 = '-8 DK'  
-1 = '-1 Inapplicable'  
-9 = '-9 Missing'
```

## SAS ALGORITHM FOR DEMENTIA

```
;
VALUE W000056W
  1 = "1 MORE THAN $500"
  2 = "2 LESS THAN $500"
  -2 = '-2 Helped last month, SP alive'
  -3 = '-3 Helped last month of life, SP deceased'
  -4 = '-4 Did not help last month or in last month of life'
  -7 = '-7 RF'
  -8 = '-8 DK'
  -1 = '-1 Inapplicable'
  -9 = '-9 Missing'
;

VALUE W000057W
  1 = '1 SP interview at 2017 NHATS & alive at NSOC'
  2 = '2 SP 2016 LML'
  3 = '3 SP 2017 LML'
  4 = '4 SP interview at 2017 & deceased at NSOC'
  5 = '5 SP interview at 2017 & more than 1 caregiver & at least 1
caregiver reports SP deceased at NSOC'
  -7 = '-7 RF'
  -8 = '-8 DK'
  -1 = '-1 Inapplicable'
  -9 = '-9 Missing'
;

VALUE W000059W
  1 = '1 CG eligible for cross-sectional sample '
  -7 = '-7 RF'
  -8 = '-8 DK'
  -1 = '-1 Inapplicable'
  -9 = '-9 Missing'
;

VALUE W000058W
  1 = '1 SP has eligible caregiver'
  -7 = '-7 RF'
  -8 = '-8 DK'
  -1 = '-1 Inapplicable'
  -9 = '-9 Missing'
;

VALUE W000060W
  1 = '1 Eligible and interviewed'
  2 = '2 Eligible and not interviewed phone number provided'
  3 = '3 Eligible and not interviewed SP refused'
  4 = '4 Eligible and not interviewed other'
  5 = '5 Eligible and not fielded for NSOC not present in R5 or R7'
  6 = '6 >5 caregivers and not sampled'
  7 = '7 Named by SP but Ineligible'
  -7 = '-7 RF'
  -8 = '-8 DK'
  -1 = '-1 Inapplicable'
  -9 = '-9 Missing'
;

VALUE W000061W
  1 = '1 Helper eligible for cross-sectional NSOC'
```

## SAS ALGORITHM FOR DEMENTIA

```
-1 = '-1 Inapplicable'
;
VALUE W000062W
1 = '1 NSOC Interview Complete'
-1 = '-1 Inapplicable'
;
VALUE W000063W
1 = '1 OP named as helper in NHATS interview'
-1 = '-1 Inapplicable'
;
VALUE W000064W
1 = '1 SP eligible for cross-sectional NSOC'
-1 = '-1 Ineligible'
;
  VALUE OCC_CODE
1   ='1 Management Occupations: 0010-0430'
2   ='2 Business and Financial Operations Occupations: 0500-0950'
3   ='3 Computer and mathematical occupations: 1000-1240'
4   ='4 Architecture and Engineering Occupations: 1300-1560'
5   ='5 Life, Physical, and Social Science Occupations: 1600-1965'
6   ='6 Community and Social Service Occupations: 2000-2060'
7   ='7 Legal Occupations: 2100-2160'
8   ='8 Education, Training, and Library Occupations: 2200-2550'
9   ='9 Arts, Design, Entertainment, Sports, and Media Occupations: 2600-
2960'
10  ='10 Healthcare Practitioners and Technical Occupations: 3000-3540'
11  ='11 Healthcare Support Occupations: 3600-3655'
12  ='12 Protective Service Occupations: 3700-3955'
13  ='13 Food Preparation and Serving Related Occupations: 4000-4160'
14  ='14 Building and Grounds Cleaning and Maintenance Occupations: 4200-
4250'
15  ='15 Personal Care and Service Occupations: 4300-4650'
16  ='16 Sales and Related Occupations: 4700-4965'
17  ='17 Office and Administrative Support Occupations: 5000-5940'
18  ='18 Farming, Fishing, and Forestry Occupations: 6000-6130'
19  ='19 Construction and Extraction Occupations: 6200-6940'
20  ='20 Installation, Maintenance, and Repair Occupations: 7000-7630'
21  ='21 Production Occupations: 7700-8965'
22  ='22 Transportation and Material Moving Occupations: 9000-9750'
23  ='23 Military Specific Occupations: 9800-9830'
24  ='24 No current occ (Unemployed, no work in the last 5 years, never
worked): 9920'
25  ='25 Blank field'
26  ='26 Code did not match'
94  ='94 Uncodable'
95  ='95 Never Worked Entire Life'
96  ='96 Homemaker/Raised Children'
-2  ='-2 Helped last month, SP alive'
-3  ='-3 Helped last month of life, SP deceased'
-4  ='-4 Did not help last month or in last month of life'
-7  ='-7 RF'
-8  ='-8 DK'
-1  ='-1 Inapplicable'
-9  ='-9 Missing'
;

value OCC_SI /*with categories for distribution checking*/
```

## SAS ALGORITHM FOR DEMENTIA

```
11 = '11 Agriculture, Forestry, Fishing and Hunting'
21 = '21 Mining, Quarrying, and Oil and Gas Extraction'
22 = '22 Utilities'
23 = '23 Construction'
31 = '31-33 Manufacturing'
32 = '31-33 Manufacturing'
33 = '31-33 Manufacturing'
42 = '42 Wholesale Trade'
44 = '44-45 Retail Trade'
45 = '44-45 Retail Trade'
48 = '48-49 Transportation and Warehousing'
49 = '48-49 Transportation and Warehousing'
51 = '51 Information'
52 = '52 Finance and Insurance'
53 = '53 Real Estate and Rental and Leasing'
54 = '54 Professional, Scientific, and Technical Services'
55 = '55 Management of Companies and Enterprises'
56 = '56 Administrative and Support and Waste Management and Remediation
Services'
61 = '61 Educational Services'
62 = '62 Health Care and Social Assistance'
71 = '71 Arts, Entertainment, and Recreation'
72 = '72 Accommodation and Food Services'
81 = '81 Other Services (except Public Administration)'
92 = '92 Public Administration'
94 = "94 Uncodeable"
99 = '99 None'
-2 = '-2 Helped last month, SP alive'
-3 = '-3 Helped last month of life, SP deceased'
-4 = '-4 Did not help last month or in last month of life'
-7 = '-7 RF'
-8 = '-8 DK'
-1 = '-1 Inapplicable'
-9 = '-9 Missing' ;
  VALUE inc7imfa
    -4 = "-4 Did not help last month or in last month of life"
    1 = "1 Reported in NSOC III"
    2 = "2 Reported in NHATS R7 (Spouse/partner of SP)"
    3 = "3 Imputed in NSOC III"
    4 = "4 Imputed in NHATS R7 (Spouse/partner of SP)" ;
RUN;
```

```
/* Import NHATS and NSOC data sets*/
```

```
%LET filepath1=C:\UB\Projects\2019\Suzanne Sullivan\NHATS project\NHATS
Public Use Files\Round 1\SAS;
%LET filepath2=C:\UB\Projects\2019\Suzanne Sullivan\NHATS project\NHATS
Public Use Files\Round 2\SAS;
%LET filepath3=C:\UB\Projects\2019\Suzanne Sullivan\NHATS project\NHATS
Public Use Files\Round 3\SAS;
%LET filepath4=C:\UB\Projects\2019\Suzanne Sullivan\NHATS project\NHATS
Public Use Files\Round 4\SAS;
%LET filepath5=C:\UB\Projects\2019\Suzanne Sullivan\NHATS project\NHATS
Public Use Files\Round 5\SAS;
```

## SAS ALGORITHM FOR DEMENTIA

```
%LET filepath6=C:\UB\Projects\2019\Suzanne Sullivan\NHATS project\NHATS
Public Use Files\Round 6\SAS;
%LET filepath7=C:\UB\Projects\2019\Suzanne Sullivan\NHATS project\NHATS
Public Use Files\Round 7\SAS;
%LET filepath8=C:\UB\Projects\2019\Suzanne Sullivan\NHATS project\NHATS
Public Use Files\Round 8\SAS;
%LET filepath9=C:\UB\Projects\2019\Suzanne Sullivan\NHATS project\NHATS
Public Use Files\Round 9\SAS;
```

```
%LET filepath10=C:\UB\Projects\2019\Suzanne Sullivan\NHATS project\Sensitive
Data Files\Round 1\NHATS Round 1 NSOC Files\SAS;
%LET filepath11=C:\UB\Projects\2019\Suzanne Sullivan\NHATS project\Sensitive
Data Files\Round 2\NHATS Round 2 NSOC Files\SAS;
%LET filepath12=C:\UB\Projects\2019\Suzanne Sullivan\NHATS project\Sensitive
Data Files\Round 3\NHATS Round 3 NSOC Files\SAS;
%LET filepath13=C:\UB\Projects\2019\Suzanne Sullivan\NHATS project\Sensitive
Data Files\Round 4\NHATS Round 4 NSOC Files\SAS;
%LET filepath14=C:\UB\Projects\2019\Suzanne Sullivan\NHATS project\Sensitive
Data Files\Round 5\NHATS Round 5 NSOC Files\SAS;
%LET filepath15=C:\UB\Projects\2019\Suzanne Sullivan\NHATS project\Sensitive
Data Files\Round 6\NHATS Round 6 NSOC Files\SAS;
%LET filepath16=C:\UB\Projects\2019\Suzanne Sullivan\NHATS project\Sensitive
Data Files\Round 7\NHATS Round 7 NSOC Files\Cross-Sectional File\SAS;
%LET filepath17=C:\UB\Projects\2019\Suzanne Sullivan\NHATS project\Sensitive
Data Files\Round 8\NHATS Round 8 NSOC Files\SAS;
%LET filepath18=C:\UB\Projects\2019\Suzanne Sullivan\NHATS project\Sensitive
Data Files\Round 9\NHATS Round 9 NSOC Files\SAS;
```

```
%LET filepath19=C:\UB\Projects\2019\Suzanne Sullivan\NHATS project\Sensitive
Data Files\Round 1\NHATS Round 1 OP Sensitive Demographic File\SAS;
%LET filepath20=C:\UB\Projects\2019\Suzanne Sullivan\NHATS project\Sensitive
Data Files\Round 2\NHATS Round 2 OP Sensitive Demographic File\SAS;
%LET filepath21=C:\UB\Projects\2019\Suzanne Sullivan\NHATS project\Sensitive
Data Files\Round 3\NHATS Round 3 OP Sensitive Demographic File\SAS;
%LET filepath22=C:\UB\Projects\2019\Suzanne Sullivan\NHATS project\Sensitive
Data Files\Round 4\NHATS Round 4 OP Sensitive Demographic File\SAS;
%LET filepath23=C:\UB\Projects\2019\Suzanne Sullivan\NHATS project\Sensitive
Data Files\Round 5\NHATS Round 5 OP Sensitive Demographic File\SAS;
%LET filepath24=C:\UB\Projects\2019\Suzanne Sullivan\NHATS project\Sensitive
Data Files\Round 6\NHATS Round 6 OP Sensitive Demographic File\SAS;
%LET filepath25=C:\UB\Projects\2019\Suzanne Sullivan\NHATS project\Sensitive
Data Files\Round 7\NHATS Round 7 OP Sensitive Demographic File\SAS;
%LET filepath26=C:\UB\Projects\2019\Suzanne Sullivan\NHATS project\Sensitive
Data Files\Round 8\NHATS Round 8 OP Sensitive Demographic File\SAS;
%LET filepath27=C:\UB\Projects\2019\Suzanne Sullivan\NHATS project\Sensitive
Data Files\Round 9\NHATS Round 9 OP Sensitive Demographic File\SAS;
```

```
%LET filepath28=C:\UB\Projects\2019\Suzanne Sullivan\NHATS project\Sensitive
Data Files\Round 1\NHATS Round 1 SP Sensitive Demographic File\SAS;
%LET filepath29=C:\UB\Projects\2019\Suzanne Sullivan\NHATS project\Sensitive
Data Files\Round 2\NHATS Round 2 SP Sensitive Demographic File\SAS;
%LET filepath30=C:\UB\Projects\2019\Suzanne Sullivan\NHATS project\Sensitive
Data Files\Round 3\NHATS Round 3 SP Sensitive Demographic File\SAS;
```

## SAS ALGORITHM FOR DEMENTIA

```
%LET filepath31=C:\UB\Projects\2019\Suzanne Sullivan\NHATS project\Sensitive
Data Files\Round 4\NHATS Round 4 SP Sensitive Demographic File\SAS;
%LET filepath32=C:\UB\Projects\2019\Suzanne Sullivan\NHATS project\Sensitive
Data Files\Round 5\NHATS Round 5 SP Sensitive Demographic File\SAS;
%LET filepath33=C:\UB\Projects\2019\Suzanne Sullivan\NHATS project\Sensitive
Data Files\Round 6\NHATS Round 6 SP Sensitive Demographic File\SAS;
%LET filepath34=C:\UB\Projects\2019\Suzanne Sullivan\NHATS project\Sensitive
Data Files\Round 7\NHATS Round 7 SP Sensitive Demographic File\SAS;
%LET filepath35=C:\UB\Projects\2019\Suzanne Sullivan\NHATS project\Sensitive
Data Files\Round 8\NHATS Round 8 SP Sensitive Demographic File\SAS;
%LET filepath36=C:\UB\Projects\2019\Suzanne Sullivan\NHATS project\Sensitive
Data Files\Round 9\NHATS Round 9 SP Sensitive Demographic File\SAS;
```

```
DATA NHATSR1_OP;
  SET "&filepath1\NHATS_Round_1_OP_File_v2";
RUN;
```

```
DATA NHATSR1_SP;
  SET "&filepath1\NHATS_Round_1_SP_File";
RUN;
```

```
DATA NHATSR2_OP;
  SET "&filepath2\NHATS_Round_2_OP_File_v2";
RUN;
```

```
DATA NHATSR2_SP;
  SET "&filepath2\NHATS_Round_2_SP_File_v2";
RUN;
```

```
DATA NHATSR3_OP;
  SET "&filepath3\NHATS_Round_3_OP_File";
RUN;
```

```
DATA NHATSR3_SP;
  SET "&filepath3\NHATS_Round_3_SP_File";
RUN;
```

```
DATA NHATSR4_OP;
  SET "&filepath4\NHATS_Round_4_OP_File";
RUN;
```

```
DATA NHATSR4_SP;
  SET "&filepath4\NHATS_Round_4_SP_File";
RUN;
```

```
DATA NHATSR5_OP;
  SET "&filepath5\NHATS_Round_5_OP_File_V2";
RUN;
```



## SAS ALGORITHM FOR DEMENTIA

```
DATA NHATSR5_SP;  
  SET "&filepath5\NHATS_Round_5_SP_File_v2";  
  RUN;
```

```
DATA NHATSR6_OP;  
  SET "&filepath6\NHATS_Round_6_OP_File_V2";  
  RUN;
```

```
DATA NHATSR6_SP;  
  SET "&filepath6\NHATS_Round_6_SP_File_V2";  
  RUN;
```

```
DATA NHATSR7_OP;  
  SET "&filepath7\NHATS_Round_7_OP_File";  
  RUN;
```

```
DATA NHATSR7_SP;  
  SET "&filepath7\NHATS_Round_7_SP_File";  
  RUN;
```

```
DATA NHATSR8_OP;  
  SET "&filepath8\NHATS_Round_8_OP_File";  
  RUN;
```

```
DATA NHATSR8_SP;  
  SET "&filepath8\NHATS_Round_8_SP_File";  
  RUN;
```

```
DATA NHATSR9_OP;  
  SET "&filepath9\NHATS_Round_9_OP_File";  
  RUN;
```

```
DATA NHATSR9_SP;  
  SET "&filepath9\NHATS_Round_9_SP_File";  
  RUN;
```

```
DATA NSOCR1;  
  SET "&filepath10\NSOC_Round_1_File_V3";  
  RUN;
```

```
DATA NSOCR5;  
  SET "&filepath14\NSOC_Round_5_File_V4";  
  RUN;
```

```
DATA NSOCR7;  
  SET "&filepath16\NSOC_R7_Crss_File_V2";  
  RUN;
```

## SAS ALGORITHM FOR DEMENTIA

```
DATA NSSDR1_OP;  
  SET "&filepath19\NHATS_Round_1_OP_Sen_Dem_File";  
RUN;
```

```
DATA NSSDR2_OP;  
  SET "&filepath20\NHATS_Round_2_OP_Sen_Dem_File";  
RUN;
```

```
DATA NSSDR3_OP;  
  SET "&filepath21\NHATS_Round_3_OP_Sen_Dem_File";  
RUN;
```

```
DATA NSSDR4_OP;  
  SET "&filepath22\NHATS_Round_4_OP_Sen_Dem_File";  
RUN;
```

```
DATA NSSDR5_OP;  
  SET "&filepath23\NHATS_Round_5_OP_Sen_Dem_File";  
RUN;
```

```
DATA NSSDR6_OP;  
  SET "&filepath24\NHATS_Round_6_OP_Sen_Dem_File";  
RUN;
```

```
DATA NSSDR7_OP;  
  SET "&filepath25\NHATS_Round_7_OP_Sen_Dem_File";  
RUN;
```

```
DATA NSSDR8_OP;  
  SET "&filepath26\NHATS_Round_8_OP_Sen_Dem_File";  
RUN;
```

```
DATA NSSDR9_OP;  
  SET "&filepath27\NHATS_Round_9_OP_Sen_Dem_File";  
RUN;
```

```
DATA NSSDR1_SP;  
  SET "&filepath28\NHATS_Round_1_SP_Sen_Dem_File";  
RUN;
```

## SAS ALGORITHM FOR DEMENTIA

```
DATA NSSDR2_SP;
  SET "&filepath29\NHATS_Round_2_SP_Sen_Dem_File";
  RUN;

DATA NSSDR3_SP;
  SET "&filepath30\NHATS_Round_3_SP_Sen_Dem_File";
  RUN;

DATA NSSDR4_SP;
  SET "&filepath31\NHATS_Round_4_SP_Sen_Dem_File";
  RUN;

DATA NSSDR5_SP;
  SET "&filepath32\NHATS_Round_5_SP_Sen_Dem_File";
  RUN;

DATA NSSDR6_SP;
  SET "&filepath33\NHATS_Round_6_SP_Sen_Dem_File";
  RUN;

DATA NSSDR7_SP;
  SET "&filepath34\NHATS_Round_7_SP_Sen_Dem_File";
  RUN;

DATA NSSDR8_SP;
  SET "&filepath35\NHATS_Round_8_SP_Sen_Dem_File";
  RUN;

DATA NSSDR9_SP;
  SET "&filepath36\NHATS_Round_9_SP_Sen_Dem_File";
  RUN;

/*Generate dementia classification */

*=====;

** NOTE: The input file to run this code is the NHATS_Round_1_File**

** FORMATS FOR CONSTRUCTED VARIABLES **;

proc format;
value rldemclas
1="1:Probable"
2="2:Possible"
3="3:No Impairment"
-1="-1:NH resident"
-9="-9:Missing"
;
;
```

## SAS ALGORITHM FOR DEMENTIA

```
value ad8dem
1="1:Probable"
2="2:Possible"
;

value clockf
0-1="0-1:Impaired"
2-5="2-5:Not impaired"
;
value wordrecf
0-3="0-3: Impaired "
4-20="4-20: Not impaired "
;
value dateprf
0-3="0-3: Impaired "
4-8="4-8: Not impaired "
;
RUN;

** DATE STEP CODE FOR CREATING DEMENTIA CLASSIFICATION VARIABLE **;

DATA NHATSR1_SP;
  SET NHATSR1_SP;
  length rldemclas
ad8_dem ad8_1-ad8_8 ad8miss_1-ad8miss_8 ad8_score ad8_miss
date_mon date_day date_yr date_dow date_sum date_sumr
preslast presfirst vplast vpfirst presvp presvpr date_prvp
clock_scorer irecall drecall wordrecall10_20
clock65 word65 datena65 domain65
3;
  label rldemclas="R1 NHATS Dementia Classification 65+";
RUN;

** 1) SET MISSING (RESIDENTIAL CARE FQ ONLY) AND N.A. (NURSING HOME
RESIDENTS) **;

DATA NHATSR1_SP;
  SET NHATSR1_SP;
  if rldresid=3 then rldemclas=-9 ;
  if rldresid=4 then rldemclas=-1 ;
RUN;

TITLE;
PROC FREQ DATA = NHATSR1_SP;
  FORMAT rldemclas rldemclas.;
  TABLES rldresid*rldemclas/LIST MISSING NOCOL NOROW NOPERCENT;
RUN;

** 2) CODE PROBABLE IF DEMENTIA DIAGNOSIS REPORTED BY SELF OR PROXY **;

DATA NHATSR1_SP;
  SET NHATSR1_SP;
  if hcldisescn9=1 and islresptye in (1,2) then rldemclas=1 ;
RUN;
```

## SAS ALGORITHM FOR DEMENTIA

```
TITLE;
PROC FREQ DATA = NHATSR1_SP;
  FORMAT rldemclas rldemclas.;
  TABLES rldresid*rldemclas/LIST MISSING NOCOL NOROW NOPERCENT;
  TABLES rldresid*hclldisescn9*islresptype*rldemclas/LIST MISSING NOCOL NOROW
NOPERCENT;
RUN;
```

```
** 3a) CODE AD8_SCORE **;
```

```
DATA NHATSR1_SP (drop=i);
  SET NHATSR1_SP;
  array think {*} cplchgthink1-cplchgthink8; ** QUESTIONNAIRE ITEMS **;
  array ad8item {*} ad8_1-ad8_8;
  array ad8miss {*} ad8miss_1-ad8miss_8;
  ad8_score =-1;
  ad8_miss =-1;

  do i=1 to dim(ad8item);
  ** INITIALIZE COUNTS TO NOT APPLICABLE**;
  ad8item{i}=-1;
  ad8miss{i}=-1;
  ** ASSIGN VALUES TO AD8 ITEMS IF PROXY AND DEMENTIA CLASS NOT ALREADY
  ASSIGNED BY REPORTED DIAGNOSIS **;
  if islresptype=2 and rldemclas=. then do;
  ad8item{i}=.;
  if think{i} in (1,3) then ad8item{i}=1; ** PROXY REPORTS A CHANGE OR
  ALZ/DEMENTIA **;
  else if think{i}=2 then ad8item{i}=0; ** PROXY REPORTS NO CHANGE **;
  ad8_score=sum(of ad8item{*}); ** COUNT AD8 ITEMS **;

  if ad8item{i} in (0,1) then ad8miss{i}=0;
  else if ad8item{i}=. then ad8miss{i}=1;
  ad8_miss=sum(of ad8miss{*}); ** COUNT MISSING AD8 ITEMS **;
  end;
  end;
RUN;
```

```
TITLE;
PROC PRINT DATA = NHATSR1_SP (OBS=50);
  WHERE ad8_score > 0;
  VAR SPID ad8_1-ad8_8 ad8_score ad8miss_1-ad8miss_8 ad8_miss;
RUN;
```

```
** 3b) CODE AD8 DEMENTIA CLASS **;
```

```
DATA NHATSR1_SP;
  SET NHATSR1_SP;
  if ad8_score>=2 then ad8_dem=1 ; ** IF SCORE >=2 THEN MEETS AD8 CRITERION
  **;
  if ad8_score in (0,1) or ad8_miss=8 then ad8_dem=2; ** IF SCORE IS 0 OR 1 OR
  ALL ITEMS MISSING THEN DOES NOT MEET AD8 CRITERION **;
RUN;
```

## SAS ALGORITHM FOR DEMENTIA

```
TITLE;
PROC PRINT DATA = NHATSR1_SP (OBS=50);
  FORMAT ad8_dem ad8dem. ;
  WHERE ad8_score >= 2;
  VAR SPID ad8_score ad8_miss ad8_dem;
RUN;

** 4) UPDATE DEMENTIA CLASSIFICATION VARIABLE WITH AD8 CLASS **;

DATA NHATSR1_SP;
  SET NHATSR1_SP;
  if rldemclas=. then do;
    if ad8_dem=1 then rldemclas=1; ** PROBABLE BASED ON AD8 SCORE **;
    if ad8_dem=2 and cgl1speaktosp=2 then rldemclas=3; ** NO DIAGNOSIS, DOES NOT
MEET AD8 CRITERION, AND PROXY SAYS CANNOT ASK SP COGNITIVE ITEMS **;
  end;
RUN;

TITLE;
PROC FREQ DATA = NHATSR1_SP;
  FORMAT ad8_dem ad8dem. rldemclas rldemclas.;
  TABLES ad8_dem*cgl1speaktosp*rldemclas/LIST MISSING NOCOL NOROW NOPERCENT;
RUN;

** 5) CODE DATE ITEMS AND COUNT **;

DATA NHATSR1_SP (drop=i);
  SET NHATSR1_SP;
  array cgl1date {*} cgl1todaydat1-cgl1todaydat4;
  array date_item {*} date_mon date_day date_yr date_dow;
  do i=1 to dim(date_item);
  if cgl1date{i} > 0 then date_item{i}=cgl1date{i}; ** CODE ONLY YES/NO
RESPONSES: MISSING/N.A. CODES -1,-9 LEFT MISSING **;
  if cgl1date{i} in (-7,2) then date_item{i}=0; ** 2:NO/DK OR -7:REFUSED RECODED
TO 0:NO/DK/RF **;
  date_sum=sum(of date_item{*}); ** COUNT CORRECT DATE ITEMS **;
  end;

  if date_sum=. then do;
  if cgl1speaktosp=2 then date_sum=-2; ** PROXY SAYS CAN'T SPEAK TO SP **;
  else if cgl1speaktosp=1 and max(of cgl1date{*})=-1 then date_sum=-3; ** PROXY
SAYS CAN SPEAK TO SP BUT SP UNABLE TO ANSWER **;
  end;

  date_sumr=date_sum;
  if date_sum=-2 then date_sumr=.; ** MISSING IF PROXY SAYS CAN'T SPEAK TO SP
**;
  else if date_sum=-3 then date_sumr=0; ** 0 IF SP UNABLE TO ANSWER **;
RUN;

** 6) PRESIDENT AND VICE PRESIDENT NAME ITEMS AND COUNT **;
```

## SAS ALGORITHM FOR DEMENTIA

```
DATA NHATSR1_SP (drop=i);
  SET NHATSR1_SP;
  array cglpres {*} cglpresidna1 cglpresidna3 cglvpname1 cglvpname3;
  array pres_item {*} preslast presfirst vplast vpfirst;

  do i=1 to dim(pres_item);
  if cglpres{i} > 0 then pres_item{i}=cglpres{i}; ** CODE ONLY YES/NO
  RESPONSES: MISSING/N.A. CODES -1,-9 LEFT MISSING **;
  if cglpres{i} in (-7,2) then pres_item{i}=0; ** 2:NO/DK OR -7:REFUSED RECODED
  TO 0:NO/DK/RF **;
  presvp=sum(of pres_item{*}); ** COUNT CORRECT PRESIDENT/VEEP NAME ITEMS **;
  end;

  if presvp=. then do;
  if cglspeaktosp=2 then presvp=-2; ** PROXY SAYS CAN'T SPEAK TO SP **;
  else if cglspeaktosp=1 and max(of cglpres{*})=-1 then presvp=-3; ** PROXY
  SAYS CAN SPEAK TO SP BUT SP UNABLE TO ANSWER **;
  end;

  presvpr=presvp;
  if presvp=-2 then presvpr=.; ** MISSING IF PROXY SAYS CAN'T SPEAK TO SP **;
  else if presvp=-3 then presvpr=0; ** 0 IF SP UNABLE TO ANSWER **;
  RUN;

  ** 7) ORIENTATION DOMAIN: SUM OF DATE RECALL AND PRESIDENT NAMING **;

  DATA NHATSR1_SP;
  SET NHATSR1_SP;
  date_prvp=sum(date_sumr,presvpr);
  RUN;

  TITLE;
  PROC PRINT DATA = NHATSR1_SP (OBS=50);
  VAR date_sumr presvpr date_prvp;
  RUN;

  ** 8) EXECUTIVE FUNCTION DOMAIN: CLOCK DRAWING SCORE **;

  DATA NHATSR1_SP;
  SET NHATSR1_SP;
  clock_scorer=cgldclkdraw;

  if cgldclkdraw in (-2,-9) then clock_scorer=.;
  if cgldclkdraw in (-3,-4,-7) then clock_scorer=0;

  ** IMPUTE MEAN SCORE TO PERSONS MISSING A CLOCK **;
  if cgldclkdraw=-9 and cglspeaktosp=1 then clock_scorer=2; ** IF PROXY SAID
  CAN ASK SP **;
  if cgldclkdraw=-9 and cglspeaktosp=-1 then clock_scorer=3; ** IF SELF
  RESPONDENT **;
  RUN;
```

## SAS ALGORITHM FOR DEMENTIA

```
TITLE;
PROC PRINT DATA = NHATSR1_SP (OBS=50);
  VAR cglldclkdraw cgl1speaktosp  clock_scorer;
RUN;

** 9) MEMORY DOMAIN: IMMEDIATE AND DELAYED WORD RECALL **;

DATA NHATSR1_SP (drop=i);
  SET NHATSR1_SP;
  array cglrecall {*} cgl1dwrddimmrc cgl1dwrddlyrc;
  array word_recall {*} irecall drecall;

  do i=1 to dim(word_recall);
    word_recall{i}=cglrecall{i};
    if cglrecall{i} in (-2,-1) then word_recall{i}=.;
    if cglrecall{i} in (-7,-3) then word_recall{i}=0;
    wordrecall10_20=sum(of word_recall{*});
  end;
RUN;

TITLE;
PROC PRINT DATA = NHATSR1_SP (OBS = 50);
  VAR cgl1dwrddimmrc cgl1dwrddlyrc irecall drecall wordrecall10_20;
RUN;

** 10) CREATE COGNITIVE DOMAINS FOR ALL ELIGIBLE **;
** I.E. PROXY BUT PROXY SAYS CAN ASK SP, NOT FQ ONLY, NOT NH **;

DATA NHATSR1_SP;
  SET NHATSR1_SP;
  if 1 < clock_scorer <=5 then clock65=0;
  if 0 <=clock_scorer <=1 then clock65=1;

  if 3 < wordrecall10_20 <=20 then word65=0;
  if 0 <= wordrecall10_20 <=3 then word65=1;

  if 3 < date_prvp <= 8 then datena65=0;
  if 0 <= date_prvp <= 3 then datena65=1;
RUN;

TITLE;
PROC PRINT DATA = NHATSR1_SP (OBS=50);
  VAR clock_scorer clock65  wordrecall10_20 word65  date_prvp  datena65;
RUN;

** 10) CREATE COGNITIVE DOMAIN SCORE **;

DATA NHATSR1_SP (drop=i);
  SET NHATSR1_SP;
  array domains {*} clock65 word65 datena65;
```



## SAS ALGORITHM FOR DEMENTIA

```
do i=1 to dim(domains);
  domain65=sum(of domains{*});
end;
RUN;
```

```
TITLE;
PROC PRINT DATA = NHATSR1_SP (OBS=50);
  VAR clock65 word65 datena65 domain65;
RUN;
```

```
** 11) UPDATE COGNITIVE CLASSIFICATION **;
```

```
DATA NHATSR1_SP;
  SET NHATSR1_SP;
  if rldemclas=. and cglspeaktosp in (-1,1) then do;
  if 2 <= domain65 <=3 then rldemclas=1; ** PROBABLE DEMENTIA **;
  if domain65 =1 then rldemclas=2; ** POSSIBLE DEMENTIA **;
  if domain65 =0 then rldemclas=3; ** NO DEMENTIA **;
  end;
RUN;
```

```
TITLE;
PROC PRINT DATA = NHATSR1_SP (OBS=50);
  FORMAT rldemclas rldemclas.;
  VAR SPID cglspeaktosp domain65 rldemclas;
RUN;
```

```
TITLE;
PROC PRINT DATA = NHATSR1_SP (OBS=50);
  FORMAT rldemclas rldemclas.;
  VAR SPID rldemclas rldresid;
RUN;
```

```
Data NHATSR1_SP;
  SET NHATSR1_SP;
  DROP ad8_dem ad8_1-ad8_8 ad8miss_1-ad8miss_8 ad8_score ad8_miss
  date_mon date_day date_yr date_dow date_sum date_sumr
  preslast presfirst vplast vpfirst presvp presvpr date_prvp
  clock_scorer irecall drecall wordrecall10_20
  clock65 word65 datena65 domain65;
RUN;
```

```
/*
SAS Programming Statements for Rounds 2
Subsequent rounds can be programmed by replacing all round 2 variables with
the appropriate round.
*/
```

## SAS ALGORITHM FOR DEMENTIA

```
** NOTE: The input file to run this code is the NHATS_Round_2_SP_File**  
** FORMATS FOR CONSTRUCTED VARIABLES **;
```

```
proc format;  
value r2demclas  
1="1:Probable dementia"  
2="2:Possible dementia"  
3="3:No dementia"  
-1="-1:Deceased or nursing home resident"  
-9="-9:Missing"  
;  
value r2ad8dem  
1="1:Meets dementia criteria"  
2="2:Does not meet dementia criteria"  
;  
value r2clockf  
0-1="0-1:Impaired"  
2-5="2-5:Not impaired"  
;  
value r2wordrecf  
0-3="0-3: Impaired "  
4-20="4-20: Not impaired "  
;  
value r2dateprf  
0-3="0-3: Impaired "  
4-8="4-8: Not impaired "  
;  
RUN;
```

```
** DATE STEP CODE FOR CREATING DEMENTIA CLASSIFICATION VARIABLE **;
```

```
DATA NHATSR2_SP;  
SET NHATSR2_SP;  
length r2demclas  
r2ad8_dem r2ad8_1-r2ad8_8 r2ad8miss_1-r2ad8miss_8 r2ad8_score r2ad8_miss  
r2date_mon r2date_day r2date_yr r2date_dow r2date_sum r2date_sumr  
r2preslast r2presfirst r2vplast r2vpfirst r2presvp r2presvpr r2date_prvp  
r2clock_scorer r2irecall r2drecall r2wordrecall0_20  
r2clock65 r2word65 r2datena65 r2domain65  
3;  
label r2demclas="R2 NHATS Dementia Classification 65+";  
  
if cg2dwrddimrc = 10 and cg2dwrddlyrc = -3 then cg2dwrddimrc = -3; **USE THIS  
LINE TO FIX A CODING ERROR IN ROUND 2 ONLY**;  
RUN;
```

```
** 1) SET MISSING (RESIDENTIAL CARE FQ ONLY) AND N.A. (NURSING HOME  
RESIDENTS, DECEASED) **;
```

```
DATA NHATSR2_SP;  
SET NHATSR2_SP;  
if r2dresid in (3,5,7) then r2demclas=-9;  
if r2dresid in (6,8) then r2demclas=-1;  
RUN;
```

## SAS ALGORITHM FOR DEMENTIA

```
TITLE;
PROC FREQ DATA = NHATSR2_SP;
  FORMAT r2demclas r2demclas.;
  TABLES r2dresid*r2demclas/LIST MISSING NOCOL NOROW NOPERCENT;
RUN;

** 2) CODE PROBABLE IF DEMENTIA DIAGNOSIS REPORTED BY SELF OR PROXY **;

DATA NHATSR2_SP;
  SET NHATSR2_SP;
  if hc2disescn9 in (1,7) and is2resptype in (1,2) then r2demclas=1;
RUN;

TITLE;
PROC FREQ DATA = NHATSR2_SP;
  FORMAT r2demclas r2demclas.;
  TABLES r2dresid*r2demclas/LIST MISSING NOCOL NOROW NOPERCENT;
  TABLES r2dresid*hc2disescn9*is2resptype*r2demclas/LIST MISSING NOCOL NOROW
NOPERCENT;
RUN;

** 3a) CODE AD8_SCORE **;

DATA NHATSR2_SP (drop=i);
  SET NHATSR2_SP;
  array r2think {*} cp2chgthink1-cp2chgthink8; ** QUESTIONNAIRE ITEMS **;
  array r2ad8item {*} r2ad8_1-r2ad8_8;
  array r2ad8miss {*} r2ad8miss_1-r2ad8miss_8;
  r2ad8_score =-1;
  r2ad8_miss =-1;

  do i=1 to dim(r2ad8item);
  ** INITIALIZE COUNTS TO NOT APPLICABLE**;
  r2ad8item{i}=-1;
  r2ad8miss{i}=-1;
  ** ASSIGN VALUES TO AD8 ITEMS IF PROXY AND DEMENTIA CLASS NOT ALREADY
  ASSIGNED BY REPORTED DIAGNOSIS **;
  if is2resptype=2 and r2demclas=. then do;
  r2ad8item{i}=.;
  if r2think{i} in (1,3) then r2ad8item{i}=1; ** PROXY REPORTS A CHANGE OR
  ALZ/DEMENTIA **;
  else if r2think{i}=2 then r2ad8item{i}=0; ** PROXY REPORTS NO CHANGE **;
  r2ad8_score=sum(of r2ad8item{*}); ** COUNT AD8 ITEMS **;

  if r2ad8item{i} in (0,1) then r2ad8miss{i}=0;
  else if r2ad8item{i}=. then r2ad8miss{i}=1;
  r2ad8_miss=sum(of r2ad8miss{*}); ** COUNT MISSING AD8 ITEMS **;
  end;
  end;

RUN;
```

## SAS ALGORITHM FOR DEMENTIA

```
TITLE;
PROC PRINT DATA = NHATSR2_SP (OBS=50);
  WHERE r2ad8_score > 0;
  VAR SPID r2ad8_1-r2ad8_8 r2ad8_score r2ad8miss_1-r2ad8miss_8 r2ad8_miss;
RUN;

** 3b) CODE AD8 DEMENTIA CLASS **;

DATA NHATSR2_SP;
  SET NHATSR2_SP;
  if cp2dad8dem=1 and is2resptype=2 and r2demclas=. then r2ad8_score=8;
  if r2ad8_score>=2 then r2ad8_dem=1 ; ** IF SCORE >=2 THEN MEETS AD8
CRITERION **;
  if r2ad8_score in (0,1) or (r2ad8_miss=8 and r2ad8_dem=.) then r2ad8_dem=2;
** IF SCORE IS 0 OR 1 OR ALL ITEMS MISSING THEN DOES NOT MEET AD8 CRITERION
**;
RUN;

TITLE;
PROC PRINT DATA = NHATSR2_SP (OBS=50);
  FORMAT r2ad8_dem r2ad8dem. ;
  WHERE r2ad8_score >= 2;
  VAR SPID r2ad8_score r2ad8_miss r2ad8_dem;
RUN;

** 4) UPDATE DEMENTIA CLASSIFICATION VARIABLE WITH AD8 CLASS **;

DATA NHATSR2_SP;
  SET NHATSR2_SP;
  if r2demclas=. then do;
  if r2ad8_dem=1 then r2demclas=1; ** PROBABLE BASED ON AD8 SCORE **;
  if r2ad8_dem=2 and cg2speaktosp=2 then r2demclas=3; ** NO DIAGNOSIS, DOES NOT
MEET AD8 CRITERION, AND PROXY SAYS CANNOT ASK SP COGNITIVE ITEMS **;
  end;
RUN;

TITLE;
PROC FREQ DATA = NHATSR2_SP (OBS = 50);
  FORMAT r2ad8_dem r2ad8dem. r2demclas r2demclas.;
  TABLES r2ad8_dem*cg2speaktosp*r2demclas/LIST MISSING NOCOL NOROW NOPERCENT;
RUN;

** 5) CODE DATE ITEMS AND COUNT **;

DATA NHATSR2_SP (drop=i);
  SET NHATSR2_SP;
  array cg2date {*} cg2todaydat1-cg2todaydat4; **USE THIS LINE FOR ROUNDS 1-3,
5 and forward**;
  *array cg4date {*} cg4todaydat1 cg4todaydat2 cg4todaydat3 cg4todaydat5;
**USE THIS LINE FOR ROUND 4**;
  array r2date_item {*} r2date_mon r2date_day r2date_yr r2date_dow;
```

## SAS ALGORITHM FOR DEMENTIA

```
do i=1 to dim(r2date_item);
if cg2date{i} > 0 then r2date_item{i}=cg2date{i}; *** CODE ONLY YES/NO
RESPONSES: MISSING/N.A. CODES -1,-9 LEFT MISSING **;
if cg2date{i} in (-7,2) then r2date_item{i}=0; ** 2:NO/DK OR -7:REFUSED
RECODED TO 0:NO/DK/RF**;
r2date_sum=sum(of r2date_item{*}); ** COUNT CORRECT DATE ITEMS**;
end;

if r2date_sum=. then do;
if cg2speaktosp=2 then r2date_sum=-2; ** PROXY SAYS CAN'T SPEAK TO SP **;
else if cg2speaktosp=1 and max(of cg2date{*})=-1 then r2date_sum=-3; ** PROXY
SAYS CAN SPEAK TO SP BUT SP UNABLE TO ANSWER **;
end;
r2date_sumr=r2date_sum;
if r2date_sum=-2 then r2date_sumr=.; ** MISSING IF PROXY SAYS CAN'T SPEAK TO
SP**;
else if r2date_sum=-3 then r2date_sumr=0; ** 0 IF SP UNABLE TO ANSWER **;
RUN;

** 6) PRESIDENT AND VICE PRESIDENT NAME ITEMS AND COUNT **;

DATA NHATSR2_SP (drop=i);
SET NHATSR2_SP;
array cg2pres {*} cg2presidna1 cg2presidna3 cg2vpname1 cg2vpname3;
array r2pres_item {*} r2preslast r2presfirst r2vplast r2vpfirst;

do i=1 to dim(r2pres_item);
if cg2pres{i} > 0 then r2pres_item{i}=cg2pres{i}; ** CODE ONLY YES/NO
RESPONSES: MISSING/N.A. CODES -1,-9 LEFT MISSING **;
if cg2pres{i} in (-7,2) then r2pres_item{i}=0; ** 2:NO/DK OR -7:REFUSED
RECODED TO 0:NO/DK/RF **;
r2presvp=sum(of r2pres_item{*}); ** COUNT CORRECT PRESIDENT/VEEP NAME ITEMS
**;
end;
if r2presvp=. then do;
if cg2speaktosp=2 then r2presvp=-2; ** PROXY SAYS CAN'T SPEAK TO SP **;
else if cg2speaktosp=1 and max(of cg2pres{*})=-1 then r2presvp=-3; ** PROXY
SAYS CAN SPEAK TO SP BUT SP UNABLE TO ANSWER **;
end;
r2presvpr=r2presvp;
if r2presvp=-2 then r2presvpr=.; ** MISSING IF PROXY SAYS CAN'T SPEAK TO SP
**;
else if r2presvp=-3 then r2presvpr=0; ** 0 IF SP UNABLE TO ANSWER **;
RUN;

** 7) ORIENTATION DOMAIN: SUM OF DATE RECALL AND PRESIDENT NAMING **;

DATA NHATSR2_SP;
SET NHATSR2_SP;
r2date_prvp=sum(r2date_sumr,r2presvpr);
RUN;

TITLE;
PROC PRINT DATA = NHATSR2_SP (OBS=50);
```

## SAS ALGORITHM FOR DEMENTIA

```
VAR r2date_sumr r2presvpr r2date_prvp;  
RUN;
```

```
** 8) EXECUTIVE FUNCTION DOMAIN: CLOCK DRAWING SCORE **;
```

```
DATA NHATSR2_SP;  
  SET NHATSR2_SP;  
  r2clock_scorer=cg2dclkdraw;  
  if cg2dclkdraw in (-2,-9) then r2clock_scorer=.;  
  if cg2dclkdraw in (-3,-4,-7) then r2clock_scorer=0;  
  ** IMPUTE MEAN SCORE TO PERSONS MISSING A CLOCK **;  
  if cg2dclkdraw=-9 and cg2speaktosp=1 then r2clock_scorer=2; ** IF PROXY SAID  
  CAN ASK SP **;  
  if cg2dclkdraw=-9 and cg2speaktosp=-1 then r2clock_scorer=3; ** IF SELF  
  RESPONDENT **;  
RUN;
```

```
TITLE;  
PROC PRINT DATA = NHATSR2_SP (OBS=50);  
  VAR cg2dclkdraw cg2speaktosp r2clock_scorer;  
RUN;
```

```
** 9) MEMORY DOMAIN: IMMEDIATE AND DELAYED WORD RECALL **;
```

```
DATA NHATSR2_SP (drop=i);  
  SET NHATSR2_SP;  
  array cg2recall {*} cg2dwrddimrc cg2dwrddlyrc;  
  array r2word_recall {*} r2irecall r2drecall;  
  do i=1 to dim(r2word_recall);  
  r2word_recall{i}=cg2recall{i};  
  if cg2recall{i} in (-2,-1) then r2word_recall{i}=.;  
  if cg2recall{i} in (-7,-3) then r2word_recall{i}=0;  
  **SET CASES WITH MISSING WORD LIST AND NOT PREVIOUSLY ASSIGNED TO MISSING  
  (ROUND 5 ONLY)**;  
  *if cg5dwrddimrc=-9 then r5word_recall{i}=.;  
  r2wordrecall0_20=sum(of r2word_recall{*});  
  end;  
RUN;
```

```
TITLE;  
PROC PRINT DATA = NHATSR2_SP (OBS = 50);  
  VAR cg2dwrddimrc cg2dwrddlyrc r2irecall r2drecall r2wordrecall0_20;  
RUN;
```

```
** 10) CREATE COGNITIVE DOMAINS FOR ALL ELIGIBLE **;  
** I.E. PROXY BUT PROXY SAYS CAN ASK SP, NOT FQ ONLY, NOT NH **;
```

```
DATA NHATSR2_SP;  
  SET NHATSR2_SP;  
  if 1 < r2clock_scorer <=5 then r2clock65=0;  
  if 0 <= r2clock_scorer <=1 then r2clock65=1;  
  if 3 < r2wordrecall0_20 <=20 then r2word65=0;
```

## SAS ALGORITHM FOR DEMENTIA

```
if 0 <= r2wordrecall10_20 <=3 then r2word65=1;
if 3 < r2date_prvp <= 8 then r2datena65=0;
if 0 <= r2date_prvp <= 3 then r2datena65=1;
RUN;
```

```
TITLE;
PROC PRINT DATA = NHATSR2_SP (OBS=50);
VAR r2clock_scorer r2clock65 r2wordrecall10_20 r2word65 r2date_prvp
r2datena65;
RUN;
```

```
** 10) CREATE COGNITIVE DOMAIN SCORE **;
```

```
DATA NHATSR2_SP (drop=i);
SET NHATSR2_SP;
array r2domains {*} r2clock65 r2word65 r2datena65;
do i=1 to dim(r2domains);
r2domain65=sum(of r2domains{*});
end;
**SET CASES WITH MISSING WORD LIST AND NOT PREVIOUSLY ASSIGNED TO MISSING
(ROUND 5 ONLY)**;
*if cg5dwrldstnm=-9 and r5demclas=. then r5demclas=-9;
RUN;
```

```
TITLE;
PROC PRINT DATA = NHATSR2_SP (OBS=50);
VAR r2clock65 r2word65 r2datena65 r2domain65;
RUN;
```

```
** 11) UPDATE COGNITIVE CLASSIFICATION **;
```

```
DATA NHATSR2_SP;
SET NHATSR2_SP;
if r2demclas=. and cg2speaktosp in (-1,1) then do;
if 2 <= r2domain65 <=3 then r2demclas=1; ** PROBABLE DEMENTIA **;
if r2domain65 =1 then r2demclas=2; ** POSSIBLE DEMENTIA **;
if r2domain65 =0 then r2demclas=3; ** NO DEMENTIA **;
end;
RUN;
```

```
TITLE;
PROC PRINT DATA = NHATSR2_SP (OBS=50);
FORMAT r2demclas r2demclas.;
VAR SPID cg2dwrddimrc cg2dwrddlyrc cg2dwrddimrc r2dresid hc2disescn9
is2resptype cg2speaktosp r2domain65 r2demclas;
RUN;
```

```
TITLE;
PROC PRINT DATA = NHATSR2_SP (OBS=50);
```

## SAS ALGORITHM FOR DEMENTIA

```
FORMAT r2demclas r2demclas.;  
VAR SPID r2demclas r2dresid r2dlmlint;  
RUN;
```

```
TITLE;  
PROC FREQ DATA = NHATSR2_SP ;  
TABLES r2dresid*r2dlmlint/LIST MISSING;  
RUN;
```

```
TITLE;  
PROC PRINT DATA = NHATSR2_SP;  
FORMAT r2demclas r2demclas.;  
WHERE r2dresid = 6 OR r2dlmlint = 1;  
VAR SPID r2demclas r2dresid r2dlmlint;  
RUN;
```

```
DATA NHATSR2_SP;  
SET NHATSR2_SP;  
DROP r2ad8_dem r2ad8_1-r2ad8_8 r2ad8miss_1-r2ad8miss_8 r2ad8_score  
r2ad8_miss  
r2date_mon r2date_day r2date_yr r2date_dow r2date_sum r2date_sumr  
r2preslast r2presfirst r2vplast r2vpfirst r2presvp r2presvpr r2date_prvp  
r2clock_scorer r2irecall r2drecall r2wordrecall10_20  
r2clock65 r2word65 r2datena65 r2domain65;  
RUN;
```

```
** NOTE: The input file to run this code is the NHATS_Round_3_SP_File**  
** FORMATS FOR CONSTRUCTED VARIABLES **;
```

```
proc format;  
value r3demclas  
1="1:Probable dementia"  
2="2:Possible dementia"  
3="3:No dementia"  
-1="-1:Deceased or nursing home resident"  
-9="-9:Missing"  
;  
value r3ad8dem  
1="1:Meets dementia criteria"  
2="2:Does not meet dementia criteria"  
;  
value r3clockf  
0-1="0-1:Impaired"  
2-5="2-5:Not impaired"  
;  
value r3wordrecf  
0-3="0-3: Impaired "  
4-20="4-20: Not impaired "  
;
```



## SAS ALGORITHM FOR DEMENTIA

```
value r3dateprf
0-3="0-3: Impaired "
4-8="4-8: Not impaired "
;
RUN;

** DATE STEP CODE FOR CREATING DEMENTIA CLASSIFICATION VARIABLE **;

DATA NHATSR3_SP;
  SET NHATSR3_SP;
  length r3demclas
r3ad8_dem r3ad8_1-r3ad8_8 r3ad8miss_1-r3ad8miss_8 r3ad8_score r3ad8_miss
r3date_mon r3date_day r3date_yr r3date_dow r3date_sum r3date_sumr
r3preslast r3presfirst r3vpplast r3vpfirst r3presvp r3presvpr r3date_prvp
r3clock_scorer r3irecall r3drecall r3wordrecall10_20
r3clock65 r3word65 r3datena65 r3domain65
3;
label r3demclas="R3 NHATS Dementia Classification 65+";

*if cg2dwrddimrc = 10 and cg2dwrddlyrc = -3 then cg2dwrddimrc = -3; **USE
THIS LINE TO FIX A CODING ERROR IN ROUND 2 ONLY**;
RUN;

** 1) SET MISSING (RESIDENTIAL CARE FQ ONLY) AND N.A. (NURSING HOME
RESIDENTS, DECEASED) **;

DATA NHATSR3_SP;
  SET NHATSR3_SP;
  if r3dresid in (3,5,7) then r3demclas=-9;
  if r3dresid in (6,8) then r3demclas=-1;
RUN;

TITLE;
PROC FREQ DATA = NHATSR3_SP;
  FORMAT r3demclas r3demclas.;
  TABLES r3dresid*r3demclas/LIST MISSING NOCOL NOROW NOPERCENT;
RUN;

** 2) CODE PROBABLE IF DEMENTIA DIAGNOSIS REPORTED BY SELF OR PROXY **;

DATA NHATSR3_SP;
  SET NHATSR3_SP;
  if hc3disescn9 in (1,7) and is3resptype in (1,2) then r3demclas=1;
RUN;

TITLE;
PROC FREQ DATA = NHATSR3_SP;
  FORMAT r3demclas r3demclas.;
  TABLES r3dresid*r3demclas/LIST MISSING NOCOL NOROW NOPERCENT;
  TABLES r3dresid*hc3disescn9*is3resptype*r3demclas/LIST MISSING NOCOL NOROW
NOPERCENT;
RUN;
```

## SAS ALGORITHM FOR DEMENTIA

```
** 3a) CODE AD8_SCORE **;  
  
DATA NHATSR3_SP (drop=i);  
  SET NHATSR3_SP;  
  array r3think {*} cp3chgthink1-cp3chgthink8; ** QUESTIONNAIRE ITEMS **;  
  array r3ad8item {*} r3ad8_1-r3ad8_8;  
  array r3ad8miss {*} r3ad8miss_1-r3ad8miss_8;  
  r3ad8_score = -1;  
  r3ad8_miss = -1;  
  
  do i=1 to dim(r3ad8item);  
    ** INITIALIZE COUNTS TO NOT APPLICABLE**;  
    r3ad8item{i} = -1;  
    r3ad8miss{i} = -1;  
    ** ASSIGN VALUES TO AD8 ITEMS IF PROXY AND DEMENTIA CLASS NOT ALREADY  
    ASSIGNED BY REPORTED DIAGNOSIS **;  
    if is3resptype=2 and r3demclas=. then do;  
      r3ad8item{i} = .;  
      if r3think{i} in (1,3) then r3ad8item{i} = 1; ** PROXY REPORTS A CHANGE OR  
      ALZ/DEMENTIA **;  
      else if r3think{i} = 2 then r3ad8item{i} = 0; ** PROXY REPORTS NO CHANGE **;  
      r3ad8_score = sum(of r3ad8item{*}); ** COUNT AD8 ITEMS **;  
  
      if r3ad8item{i} in (0,1) then r3ad8miss{i} = 0;  
      else if r3ad8item{i} = . then r3ad8miss{i} = 1;  
      r3ad8_miss = sum(of r3ad8miss{*}); ** COUNT MISSING AD8 ITEMS **;  
    end;  
  end;  
  
RUN;  
  
TITLE;  
PROC PRINT DATA = NHATSR3_SP (OBS=50);  
  WHERE r3ad8_score > 0;  
  VAR SPID r3ad8_1-r3ad8_8 r3ad8_score r3ad8miss_1-r3ad8miss_8 r3ad8_miss;  
RUN;  
  
** 3b) CODE AD8 DEMENTIA CLASS **;  
  
DATA NHATSR3_SP;  
  SET NHATSR3_SP;  
  if cp3dad8dem=1 and is3resptype=2 and r3demclas=. then r3ad8_score=8;  
  if r3ad8_score >= 2 then r3ad8_dem=1; ** IF SCORE >= 2 THEN MEETS AD8  
  CRITERION **;  
  if r3ad8_score in (0,1) or (r3ad8_miss=8 and r3ad8_dem=.) then r3ad8_dem=2;  
  ** IF SCORE IS 0 OR 1 OR ALL ITEMS MISSING THEN DOES NOT MEET AD8 CRITERION  
  **;  
RUN;  
  
TITLE;  
PROC PRINT DATA = NHATSR3_SP (OBS=50);  
  FORMAT r3ad8_dem r3ad8dem. ;
```

## SAS ALGORITHM FOR DEMENTIA

```
WHERE r3ad8_score >= 2;  
VAR SPID r3ad8_score r3ad8_miss r3ad8_dem;  
RUN;
```

```
** 4) UPDATE DEMENTIA CLASSIFICATION VARIABLE WITH AD8 CLASS **;
```

```
DATA NHATSR3_SP;  
SET NHATSR3_SP;  
if r3demclas=. then do;  
if r3ad8_dem=1 then r3demclas=1; ** PROBABLE BASED ON AD8 SCORE **;  
if r3ad8_dem=2 and cg3speaktosp=2 then r3demclas=3; ** NO DIAGNOSIS, DOES NOT  
MEET AD8 CRITERION, AND PROXY SAYS CANNOT ASK SP COGNITIVE ITEMS **;  
end;  
RUN;
```

```
TITLE;  
PROC FREQ DATA = NHATSR3_SP (OBS = 50);  
FORMAT r3ad8_dem r3ad8dem. r3demclas r3demclas.;  
TABLES r3ad8_dem*cg3speaktosp*r3demclas/LIST MISSING NOCOL NOROW NOPERCENT;  
RUN;
```

```
** 5) CODE DATE ITEMS AND COUNT **;
```

```
DATA NHATSR3_SP (drop=i);  
SET NHATSR3_SP;  
array cg3date {*} cg3todaydat1-cg3todaydat4; **USE THIS LINE FOR ROUNDS 1-3,  
5 and forward**;  
*array cg4date {*} cg4todaydat1 cg4todaydat2 cg4todaydat3 cg4todaydat5;  
**USE THIS LINE FOR ROUND 4**;  
array r3date_item {*} r3date_mon r3date_day r3date_yr r3date_dow;  
  
do i=1 to dim(r3date_item);  
if cg3date{i} > 0 then r3date_item{i}=cg3date{i}; *** CODE ONLY YES/NO  
RESPONSES: MISSING/N.A. CODES -1,-9 LEFT MISSING **;  
if cg3date{i} in (-7,2) then r3date_item{i}=0; ** 2:NO/DK OR -7:REFUSED  
RECODED TO 0:NO/DK/RF**;  
r3date_sum=sum(of r3date_item{*}); ** COUNT CORRECT DATE ITEMS**;  
end;  
  
if r3date_sum=. then do;  
if cg3speaktosp=2 then r3date_sum=-2; ** PROXY SAYS CAN'T SPEAK TO SP **;  
else if cg3speaktosp=1 and max(of cg3date{*})=-1 then r3date_sum=-3; ** PROXY  
SAYS CAN SPEAK TO SP BUT SP UNABLE TO ANSWER **;  
end;  
r3date_sumr=r3date_sum;  
if r3date_sum=-2 then r3date_sumr=.; ** MISSING IF PROXY SAYS CAN'T SPEAK TO  
SP**;  
else if r3date_sum=-3 then r3date_sumr=0; ** 0 IF SP UNABLE TO ANSWER **;  
RUN;
```

```
** 6) PRESIDENT AND VICE PRESIDENT NAME ITEMS AND COUNT **;
```

```
DATA NHATSR3_SP (drop=i);
```

## SAS ALGORITHM FOR DEMENTIA

```
SET NHATSR3_SP;
array cg3pres {*} cg3presidna1 cg3presidna3 cg3vpname1 cg3vpname3;
array r3pres_item {*} r3preslast r3presfirst r3vplast r3vpfirst;

do i=1 to dim(r3pres_item);
if cg3pres{i} > 0 then r3pres_item{i}=cg3pres{i}; ** CODE ONLY YES/NO
RESPONSES: MISSING/N.A. CODES -1,-9 LEFT MISSING **;
if cg3pres{i} in (-7,2) then r3pres_item{i}=0; ** 2:NO/DK OR -7:REFUSED
RECODED TO 0:NO/DK/RF **;
r3presvp=sum(of r3pres_item{*}); ** COUNT CORRECT PRESIDENT/VEEP NAME ITEMS
**;
end;
if r3presvp=. then do;
if cg3speaktosp=2 then r3presvp=-2; ** PROXY SAYS CAN'T SPEAK TO SP **;
else if cg3speaktosp=1 and max(of cg3pres{*})=-1 then r3presvp=-3; ** PROXY
SAYS CAN SPEAK TO SP BUT SP UNABLE TO ANSWER **;
end;
r3presvpr=r3presvp;
if r3presvp=-2 then r3presvpr=.; ** MISSING IF PROXY SAYS CAN'T SPEAK TO SP
**;
else if r3presvp=-3 then r3presvpr=0; ** 0 IF SP UNABLE TO ANSWER **;
RUN;
```

\*\* 7) ORIENTATION DOMAIN: SUM OF DATE RECALL AND PRESIDENT NAMING \*\*;

```
DATA NHATSR3_SP;
SET NHATSR3_SP;
r3date_prvp=sum(r3date_sumr,r3presvpr);
RUN;
```

```
TITLE;
PROC PRINT DATA = NHATSR3_SP (OBS=50);
VAR r3date_sumr r3presvpr r3date_prvp;
RUN;
```

\*\* 8) EXECUTIVE FUNCTION DOMAIN: CLOCK DRAWING SCORE \*\*;

```
DATA NHATSR3_SP;
SET NHATSR3_SP;
r3clock_scorer=cg3dclkdraw;
if cg3dclkdraw in (-2,-9) then r3clock_scorer=.;
if cg3dclkdraw in (-3,-4,-7) then r3clock_scorer=0;
** IMPUTE MEAN SCORE TO PERSONS MISSING A CLOCK **;
if cg3dclkdraw=-9 and cg3speaktosp=1 then r3clock_scorer=2; ** IF PROXY SAID
CAN ASK SP **;
if cg3dclkdraw=-9 and cg3speaktosp=-1 then r3clock_scorer=3; ** IF SELF
RESPONDENT **;
RUN;
```

```
TITLE;
PROC PRINT DATA = NHATSR3_SP (OBS=50);
VAR cg3dclkdraw cg3speaktosp r3clock_scorer;
RUN;
```

## SAS ALGORITHM FOR DEMENTIA

```
** 9) MEMORY DOMAIN: IMMEDIATE AND DELAYED WORD RECALL **;
```

```
DATA NHATSR3_SP (drop=i);  
  SET NHATSR3_SP;  
  array cg3recall {*} cg3dwrddimrc cg3dwrddlyrc;  
  array r3word_recall {*} r3irecall r3drecall;  
do i=1 to dim(r3word_recall);  
  r3word_recall{i}=cg3recall{i};  
  if cg3recall{i} in (-2,-1) then r3word_recall{i}=.;  
  if cg3recall{i} in (-7,-3) then r3word_recall{i}=0;  
**SET CASES WITH MISSING WORD LIST AND NOT PREVIOUSLY ASSIGNED TO MISSING  
(ROUND 5 ONLY)**;  
  *if cg5dwrddimrc=-9 then r5word_recall{i}=.;  
r3wordrecall10_20=sum(of r3word_recall{*});  
end;  
RUN;
```

```
TITLE;  
PROC PRINT DATA = NHATSR3_SP (OBS = 50);  
  VAR cg3dwrddimrc cg3dwrddlyrc r3irecall r3drecall r3wordrecall10_20;  
RUN;
```

```
** 10) CREATE COGNITIVE DOMAINS FOR ALL ELIGIBLE **;  
** I.E. PROXY BUT PROXY SAYS CAN ASK SP, NOT FQ ONLY, NOT NH **;
```

```
DATA NHATSR3_SP;  
  SET NHATSR3_SP;  
  if 1 < r3clock_scorer <=5 then r3clock65=0;  
  if 0 <= r3clock_scorer <=1 then r3clock65=1;  
  if 3 < r3wordrecall10_20 <=20 then r3word65=0;  
  if 0 <= r3wordrecall10_20 <=3 then r3word65=1;  
  if 3 < r3date_prvp <= 8 then r3datena65=0;  
  if 0 <= r3date_prvp <= 3 then r3datena65=1;  
RUN;
```

```
TITLE;  
PROC PRINT DATA = NHATSR3_SP (OBS=50);  
  VAR r3clock_scorer r3clock65 r3wordrecall10_20 r3word65 r3date_prvp  
  r3datena65;  
RUN;
```

```
** 10) CREATE COGNITIVE DOMAIN SCORE **;
```

```
DATA NHATSR3_SP (drop=i);  
  SET NHATSR3_SP;  
array r3domains {*} r3clock65 r3word65 r3datena65;  
do i=1 to dim(r3domains);  
  r3domain65=sum(of r3domains{*});  
end;  
**SET CASES WITH MISSING WORD LIST AND NOT PREVIOUSLY ASSIGNED TO MISSING  
(ROUND 5 ONLY)**;
```

## SAS ALGORITHM FOR DEMENTIA

```
*if cg5dwrldstnm=-9 and r5demclas=. then r5demclas=-9;
```

```
RUN;
```

```
TITLE;
```

```
PROC PRINT DATA = NHATSR3_SP (OBS=50);  
  VAR r3clock65 r3word65 r3datena65 r3domain65;  
RUN;
```

```
** 11) UPDATE COGNITIVE CLASSIFICATION **;
```

```
DATA NHATSR3_SP;  
  SET NHATSR3_SP;  
  if r3demclas=. and cg3speaktosp in (-1,1) then do;  
    if 2 <= r3domain65 <=3 then r3demclas=1; ** PROBABLE DEMENTIA **;  
    if r3domain65 =1 then r3demclas=2; ** POSSIBLE DEMENTIA **;  
    if r3domain65 =0 then r3demclas=3; ** NO DEMENTIA **;  
  end;
```

```
RUN;
```

```
TITLE;
```

```
PROC PRINT DATA = NHATSR3_SP (OBS=50);  
  FORMAT r3demclas r3demclas.;  
  VAR SPID cg3dwrddimrc cg3dwrddlyrc cg3dwrddimrc r3dresid hc3disescn9  
  is3resptype cg3speaktosp r3domain65 r3demclas;  
RUN;
```

```
TITLE;
```

```
PROC PRINT DATA = NHATSR3_SP (OBS=50);  
  FORMAT r3demclas r3demclas.;  
  VAR SPID r3demclas r3dresid r3dlmlint;  
RUN;
```

```
TITLE;
```

```
PROC FREQ DATA = NHATSR3_SP ;  
  TABLES r3dresid*r3dlmlint/LIST MISSING;  
RUN;
```

```
TITLE;
```

```
PROC PRINT DATA = NHATSR3_SP;  
  FORMAT r3demclas r3demclas.;  
  WHERE r3dresid = 6 OR r3dlmlint = 1;  
  VAR SPID r3demclas r3dresid r3dlmlint;  
RUN;
```

```
DATA NHATSR3_SP;
```

## SAS ALGORITHM FOR DEMENTIA

```
SET NHATSR3_SP;
DROP r3ad8_dem r3ad8_1-r3ad8_8 r3ad8miss_1-r3ad8miss_8 r3ad8_score
r3ad8_miss
r3date_mon r3date_day r3date_yr r3date_dow r3date_sum r3date_sumr
r3preslast r3presfirst r3vplast r3vpfirst r3presvp r3presvpr r3date_prvp
r3clock_scorer r3irecall r3drecall r3wordrecall10_20
r3clock65 r3word65 r3datena65 r3domain65;
RUN;
```

```
** NOTE: The input file to run this code is the NHATS_Round_4_SP_File**
** FORMATS FOR CONSTRUCTED VARIABLES **;
```

```
proc format;
value r4demclas
1="1:Probable dementia"
2="2:Possible dementia"
3="3:No dementia"
-1="-1:Deceased or nursing home resident"
-9="-9:Missing"
;
value r4ad8dem
1="1:Meets dementia criteria"
2="2:Does not meet dementia criteria"
;
value r4clockf
0-1="0-1:Impaired"
2-5="2-5:Not impaired"
;
value r4wordrecf
0-3="0-3: Impaired "
4-20="4-20: Not impaired "
;
value r4dateprf
0-3="0-3: Impaired "
4-8="4-8: Not impaired "
;
RUN;
```

```
** DATE STEP CODE FOR CREATING DEMENTIA CLASSIFICATION VARIABLE **;
```

```
DATA NHATSR4_SP;
SET NHATSR4_SP;
length r4demclas
r4ad8_dem r4ad8_1-r4ad8_8 r4ad8miss_1-r4ad8miss_8 r4ad8_score r4ad8_miss
r4date_mon r4date_day r4date_yr r4date_dow r4date_sum r4date_sumr
r4preslast r4presfirst r4vplast r4vpfirst r4presvp r4presvpr r4date_prvp
r4clock_scorer r4irecall r4drecall r4wordrecall10_20
r4clock65 r4word65 r4datena65 r4domain65
3;
label r4demclas="R4 NHATS Dementia Classification 65+";
```

```
*if cg2dwrddimrc = 10 and cg2dwrddlyrc = -3 then cg2dwrddimrc = -3; **USE
THIS LINE TO FIX A CODING ERROR IN ROUND 2 ONLY**;
```

## SAS ALGORITHM FOR DEMENTIA

**RUN;**

```
** 1) SET MISSING (RESIDENTIAL CARE FQ ONLY) AND N.A. (NURSING HOME  
RESIDENTS, DECEASED) **;
```

```
DATA NHATSR4_SP;  
  SET NHATSR4_SP;  
  if r4dresid in (3,5,7) then r4demclas=-9;  
  if r4dresid in (6,8) then r4demclas=-1;  
RUN;
```

**TITLE;**

```
PROC FREQ DATA = NHATSR4_SP;  
  FORMAT r4demclas r4demclas. ;  
  TABLES r4dresid*r4demclas/LIST MISSING NOCOL NOROW NOPERCENT;  
RUN;
```

```
** 2) CODE PROBABLE IF DEMENTIA DIAGNOSIS REPORTED BY SELF OR PROXY **;
```

```
DATA NHATSR4_SP;  
  SET NHATSR4_SP;  
  if hc4disescn9 in (1,7) and is4resptype in (1,2) then r4demclas=1;  
RUN;
```

**TITLE;**

```
PROC FREQ DATA = NHATSR4_SP;  
  FORMAT r4demclas r4demclas. ;  
  TABLES r4dresid*r4demclas/LIST MISSING NOCOL NOROW NOPERCENT;  
  TABLES r4dresid*hc4disescn9*is4resptype*r4demclas/LIST MISSING NOCOL NOROW  
NOPERCENT;  
RUN;
```

```
** 3a) CODE AD8_SCORE **;
```

```
DATA NHATSR4_SP (drop=i);  
  SET NHATSR4_SP;  
  array r4think {*} cp4chgthink1-cp4chgthink8; ** QUESTIONNAIRE ITEMS **;  
  array r4ad8item {*} r4ad8_1-r4ad8_8;  
  array r4ad8miss {*} r4ad8miss_1-r4ad8miss_8;  
  r4ad8_score =-1;  
  r4ad8_miss =-1;  
  
  do i=1 to dim(r4ad8item);  
  ** INITIALIZE COUNTS TO NOT APPLICABLE**;  
  r4ad8item{i}=-1;  
  r4ad8miss{i}=-1;  
  ** ASSIGN VALUES TO AD8 ITEMS IF PROXY AND DEMENTIA CLASS NOT ALREADY  
  ASSIGNED BY REPORTED DIAGNOSIS **;  
  if is4resptype=2 and r4demclas=. then do;  
  r4ad8item{i}=.;  
  if r4think{i} in (1,3) then r4ad8item{i}=1; ** PROXY REPORTS A CHANGE OR  
  ALZ/DEMENTIA **;
```



## SAS ALGORITHM FOR DEMENTIA

```
else if r4think{i}=2 then r4ad8item{i}=0; ** PROXY REPORTS NO CHANGE **;  
r4ad8_score=sum(of r4ad8item{*}); ** COUNT AD8 ITEMS **;
```

```
if r4ad8item{i} in (0,1) then r4ad8miss{i}=0;  
else if r4ad8item{i}=. then r4ad8miss{i}=1;  
r4ad8_miss=sum(of r4ad8miss{*}); ** COUNT MISSING AD8 ITEMS **;  
end;  
end;
```

```
RUN;
```

```
TITLE;
```

```
PROC PRINT DATA = NHATSR4_SP (OBS=50);  
WHERE r4ad8_score > 0;  
VAR SPID r4ad8_1-r4ad8_8 r4ad8_score r4ad8miss_1-r4ad8miss_8 r4ad8_miss;  
RUN;
```

```
** 3b) CODE AD8 DEMENTIA CLASS **;
```

```
DATA NHATSR4_SP;  
SET NHATSR4_SP;  
if cp4dad8dem=1 and is4resptype=2 and r4demclas=. then r4ad8_score=8;  
if r4ad8_score>=2 then r4ad8_dem=1; ** IF SCORE >=2 THEN MEETS AD8  
CRITERION **;  
if r4ad8_score in (0,1) or (r4ad8_miss=8 and r4ad8_dem=.) then r4ad8_dem=2;  
** IF SCORE IS 0 OR 1 OR ALL ITEMS MISSING THEN DOES NOT MEET AD8 CRITERION  
**;  
RUN;
```

```
TITLE;
```

```
PROC PRINT DATA = NHATSR4_SP (OBS=50);  
FORMAT r4ad8_dem r4ad8dem. ;  
WHERE r4ad8_score >= 2;  
VAR SPID r4ad8_score r4ad8_miss r4ad8_dem;  
RUN;
```

```
** 4) UPDATE DEMENTIA CLASSIFICATION VARIABLE WITH AD8 CLASS **;
```

```
DATA NHATSR4_SP;  
SET NHATSR4_SP;  
if r4demclas=. then do;  
if r4ad8_dem=1 then r4demclas=1; ** PROBABLE BASED ON AD8 SCORE **;  
if r4ad8_dem=2 and cg4speaktosp=2 then r4demclas=3; ** NO DIAGNOSIS, DOES NOT  
MEET AD8 CRITERION, AND PROXY SAYS CANNOT ASK SP COGNITIVE ITEMS **;  
end;  
RUN;
```

```
TITLE;
```

```
PROC FREQ DATA = NHATSR4_SP (OBS = 50);  
FORMAT r4ad8_dem r4ad8dem. r4demclas r4demclas. ;  
TABLES r4ad8_dem*cg4speaktosp*r4demclas/LIST MISSING NOCOL NOROW NOPERCENT;  
RUN;
```

## SAS ALGORITHM FOR DEMENTIA

```
** 5) CODE DATE ITEMS AND COUNT **;
```

```
DATA NHATSR4_SP (drop=i);  
  SET NHATSR4_SP;  
  *array cg3date {*} cg3todaydat1-cg3todaydat4; **USE THIS LINE FOR ROUNDS 1-  
3, 5 and forward**;  
  array cg4date {*} cg4todaydat1 cg4todaydat2 cg4todaydat3 cg4todaydat5; **USE  
THIS LINE FOR ROUND 4**;  
  array r4date_item {*} r4date_mon r4date_day r4date_yr r4date_dow;  
  
do i=1 to dim(r4date_item);  
if cg4date{i} > 0 then r4date_item{i}=cg4date{i}; *** CODE ONLY YES/NO  
RESPONSES: MISSING/N.A. CODES -1,-9 LEFT MISSING **;  
if cg4date{i} in (-7,2) then r4date_item{i}=0; ** 2:NO/DK OR -7:REFUSED  
RECODED TO 0:NO/DK/RF**;  
r4date_sum=sum(of r4date_item{*}); ** COUNT CORRECT DATE ITEMS**;  
end;  
  
if r4date_sum=. then do;  
if cg4speaktosp=2 then r4date_sum=-2; ** PROXY SAYS CAN'T SPEAK TO SP **;  
else if cg4speaktosp=1 and max(of cg4date{*})=-1 then r4date_sum=-3; ** PROXY  
SAYS CAN SPEAK TO SP BUT SP UNABLE TO ANSWER **;  
end;  
r4date_sumr=r4date_sum;  
if r4date_sum=-2 then r4date_sumr=.; ** MISSING IF PROXY SAYS CAN'T SPEAK TO  
SP**;  
else if r4date_sum=-3 then r4date_sumr=0; ** 0 IF SP UNABLE TO ANSWER **;  
RUN;
```

```
** 6) PRESIDENT AND VICE PRESIDENT NAME ITEMS AND COUNT **;
```

```
DATA NHATSR4_SP (drop=i);  
  SET NHATSR4_SP;  
  array cg4pres {*} cg4presidna1 cg4presidna3 cg4vpname1 cg4vpname3;  
  array r4pres_item {*} r4preslast r4presfirst r4vplast r4vpfirst;  
  
do i=1 to dim(r4pres_item);  
if cg4pres{i} > 0 then r4pres_item{i}=cg4pres{i}; ** CODE ONLY YES/NO  
RESPONSES: MISSING/N.A. CODES -1,-9 LEFT MISSING **;  
if cg4pres{i} in (-7,2) then r4pres_item{i}=0; ** 2:NO/DK OR -7:REFUSED  
RECODED TO 0:NO/DK/RF **;  
r4presvp=sum(of r4pres_item{*}); ** COUNT CORRECT PRESIDENT/VEEP NAME ITEMS  
**;  
end;  
  
if r4presvp=. then do;  
if cg4speaktosp=2 then r4presvp=-2; ** PROXY SAYS CAN'T SPEAK TO SP **;  
else if cg4speaktosp=1 and max(of cg4pres{*})=-1 then r4presvp=-3; ** PROXY  
SAYS CAN SPEAK TO SP BUT SP UNABLE TO ANSWER **;  
end;  
r4presvpr=r4presvp;  
if r4presvp=-2 then r4presvpr=.; ** MISSING IF PROXY SAYS CAN'T SPEAK TO SP  
**;  
else if r4presvp=-3 then r4presvpr=0; ** 0 IF SP UNABLE TO ANSWER **;  
RUN;
```

## SAS ALGORITHM FOR DEMENTIA

\*\* 7) ORIENTATION DOMAIN: SUM OF DATE RECALL AND PRESIDENT NAMING \*\*;

```
DATA NHATSR4_SP;  
  SET NHATSR4_SP;  
  r4date_prvp=sum(r4date_sumr,r4presvpr);  
RUN;
```

```
TITLE;  
PROC PRINT DATA = NHATSR4_SP (OBS=50);  
  VAR r4date_sumr r4presvpr r4date_prvp;  
RUN;
```

\*\* 8) EXECUTIVE FUNCTION DOMAIN: CLOCK DRAWING SCORE \*\*;

```
DATA NHATSR4_SP;  
  SET NHATSR4_SP;  
  r4clock_scorer=cg4dclkdraw;  
  if cg4dclkdraw in (-2,-9) then r4clock_scorer=.;  
  if cg4dclkdraw in (-3,-4,-7) then r4clock_scorer=0;  
  ** IMPUTE MEAN SCORE TO PERSONS MISSING A CLOCK **;  
  if cg4dclkdraw=-9 and cg4speaktosp=1 then r4clock_scorer=2; ** IF PROXY SAID  
  CAN ASK SP **;  
  if cg4dclkdraw=-9 and cg4speaktosp=-1 then r4clock_scorer=3; ** IF SELF  
  RESPONDENT **;  
RUN;
```

```
TITLE;  
PROC PRINT DATA = NHATSR4_SP (OBS=50);  
  VAR cg4dclkdraw cg4speaktosp r4clock_scorer;  
RUN;
```

\*\* 9) MEMORY DOMAIN: IMMEDIATE AND DELAYED WORD RECALL \*\*;

```
DATA NHATSR4_SP (drop=i);  
  SET NHATSR4_SP;  
  array cg4recall {*} cg4dwrddimrc cg4dwrddlyrc;  
  array r4word_recall {*} r4irecall r4drecall;  
  do i=1 to dim(r4word_recall);  
  r4word_recall{i}=cg4recall{i};  
  if cg4recall{i} in (-2,-1) then r4word_recall{i}=.;  
  if cg4recall{i} in (-7,-3) then r4word_recall{i}=0;  
  **SET CASES WITH MISSING WORD LIST AND NOT PREVIOUSLY ASSIGNED TO MISSING  
  (ROUND 5 ONLY)**;  
  *if cg5dwrddimrc=-9 then r5word_recall{i}=.;  
  r4wordrecall10_20=sum(of r4word_recall{*});  
end;  
RUN;
```

```
TITLE;  
PROC PRINT DATA = NHATSR4_SP (OBS = 50);
```

## SAS ALGORITHM FOR DEMENTIA

```
VAR cg4dwrddimmrc cg4dwrddlyrc r4irecall r4drecall r4wordrecall0_20;  
RUN;
```

```
** 10) CREATE COGNITIVE DOMAINS FOR ALL ELIGIBLE **;  
** I.E. PROXY BUT PROXY SAYS CAN ASK SP, NOT FQ ONLY, NOT NH **;
```

```
DATA NHATSR4_SP;  
  SET NHATSR4_SP;  
  if 1 < r4clock_scorer <=5 then r4clock65=0;  
  if 0 <= r4clock_scorer <=1 then r4clock65=1;  
  if 3 < r4wordrecall0_20 <=20 then r4word65=0;  
  if 0 <= r4wordrecall0_20 <=3 then r4word65=1;  
  if 3 < r4date_prvp <= 8 then r4datena65=0;  
  if 0 <= r4date_prvp <= 3 then r4datena65=1;  
RUN;
```

```
TITLE;  
PROC PRINT DATA = NHATSR4_SP (OBS=50);  
  VAR r4clock_scorer r4clock65 r4wordrecall0_20 r4word65 r4date_prvp  
  r4datena65;  
RUN;
```

```
** 10) CREATE COGNITIVE DOMAIN SCORE **;
```

```
DATA NHATSR4_SP (drop=i);  
  SET NHATSR4_SP;  
  array r4domains {*} r4clock65 r4word65 r4datena65;  
  do i=1 to dim(r4domains);  
    r4domain65=sum(of r4domains{*});  
  end;  
  **SET CASES WITH MISSING WORD LIST AND NOT PREVIOUSLY ASSIGNED TO MISSING  
  (ROUND 5 ONLY)**;  
  *if cg5dwrldstnm=-9 and r5demclas=. then r5demclas=-9;
```

```
RUN;
```

```
TITLE;  
PROC PRINT DATA = NHATSR4_SP (OBS=50);  
  VAR r4clock65 r4word65 r4datena65 r4domain65;  
RUN;
```

```
** 11) UPDATE COGNITIVE CLASSIFICATION **;
```

```
DATA NHATSR4_SP;  
  SET NHATSR4_SP;  
  if r4demclas=. and cg4speaktosp in (-1,1) then do;  
    if 2 <= r4domain65 <=3 then r4demclas=1; ** PROBABLE DEMENTIA **;  
    if r4domain65 =1 then r4demclas=2; ** POSSIBLE DEMENTIA **;  
    if r4domain65 =0 then r4demclas=3; ** NO DEMENTIA **;  
  end;
```

```
RUN;
```

## SAS ALGORITHM FOR DEMENTIA

```
TITLE;
PROC PRINT DATA = NHATSR4_SP (OBS=50);
  FORMAT r4demclas r4demclas.;
  VAR SPID cg4dwrddimmrc cg4dwrddlyrc cg4dwrddimmrc r4dresid hc4disescn9
is4resptype cg4speaktosp r4domain65 r4demclas;
RUN;
```

```
TITLE;
PROC PRINT DATA = NHATSR4_SP (OBS=50);
  FORMAT r4demclas r4demclas.;
  VAR SPID r4demclas r4dresid r4dlmlint;
RUN;
```

```
TITLE;
PROC FREQ DATA = NHATSR4_SP ;
  TABLES r4dresid*r4dlmlint/LIST MISSING;
RUN;
```

```
TITLE;
PROC PRINT DATA = NHATSR4_SP;
  FORMAT r4demclas r4demclas.;
  WHERE r4dresid = 6 OR r4dlmlint = 1;
  VAR SPID r4demclas r4dresid r4dlmlint;
RUN;
```

```
DATA NHATSR4_SP;
  SET NHATSR4_SP;
  DROP r4ad8_dem r4ad8_1-r4ad8_8 r4ad8miss_1-r4ad8miss_8 r4ad8_score
r4ad8_miss
r4date_mon r4date_day r4date_yr r4date_dow r4date_sum r4date_sumr
r4preslast r4presfirst r4vpplast r4vpfirst r4presvp r4presvpr r4date_prvp
r4clock_scorer r4irecall r4drecall r4wordrecall0_20
r4clock65 r4word65 r4datena65 r4domain65;
RUN;
```

```
** NOTE: The input file to run this code is the NHATS_Round_5_SP_File**
** FORMATS FOR CONSTRUCTED VARIABLES **;
```

```
proc format;
value r5demclas
1="1:Probable dementia"
2="2:Possible dementia"
3="3:No dementia"
-1="-1:Deceased or nursing home resident"
-9="-9:Missing"
;
```

## SAS ALGORITHM FOR DEMENTIA

```
value r5ad8dem
1="1:Meets dementia criteria"
2="2:Does not meet dementia criteria"
;
value r5clockf
0-1="0-1:Impaired"
2-5="2-5:Not impaired"
;
value r5wordrecf
0-3="0-3: Impaired "
4-20="4-20: Not impaired "
;
value r5dateprf
0-3="0-3: Impaired "
4-8="4-8: Not impaired "
;
RUN;

** DATE STEP CODE FOR CREATING DEMENTIA CLASSIFICATION VARIABLE **;

DATA NHATSR5_SP;
  SET NHATSR5_SP;
  length r5demclas
  r5ad8_dem r5ad8_1-r5ad8_8 r5ad8miss_1-r5ad8miss_8 r5ad8_score r5ad8_miss
  r5date_mon r5date_day r5date_yr r5date_dow r5date_sum r5date_sumr
  r5preslast r5presfirst r5vplast r5vpfirst r5presvp r5presvpr r5date_prvp
  r5clock_scorer r5irecall r5drecall r5wordrecall0_20
  r5clock65 r5word65 r5datena65 r5domain65
3;
label r5demclas="R5 NHATS Dementia Classification 65+";

*if cg2dwrddimrc = 10 and cg2dwrddlyrc = -3 then cg2dwrddimrc = -3; **USE
THIS LINE TO FIX A CODING ERROR IN ROUND 2 ONLY**;
RUN;

** 1) SET MISSING (RESIDENTIAL CARE FQ ONLY) AND N.A. (NURSING HOME
RESIDENTS, DECEASED) **;

DATA NHATSR5_SP;
  SET NHATSR5_SP;
  if r5dresid in (3,5,7) then r5demclas=-9;
  if r5dresid in (6,8) then r5demclas=-1;
RUN;

TITLE;
PROC FREQ DATA = NHATSR5_SP;
  FORMAT r5demclas r5demclas.;
  TABLES r5dresid*r5demclas/LIST MISSING NOCOL NOROW NOPERCENT;
RUN;

** 2) CODE PROBABLE IF DEMENTIA DIAGNOSIS REPORTED BY SELF OR PROXY **;

DATA NHATSR5_SP;
```

## SAS ALGORITHM FOR DEMENTIA

```
SET NHATSR5_SP;
if hc5disescn9 in (1,7) and is5resptype in (1,2) then r5demclas=1;
RUN;

TITLE;
PROC FREQ DATA = NHATSR5_SP;
  FORMAT r5demclas r5demclas.;
  TABLES r5dresid*r5demclas/LIST MISSING NOCOL NOROW NOPERCENT;
  TABLES r5dresid*hc5disescn9*is5resptype*r5demclas/LIST MISSING NOCOL NOROW
  NOPERCENT;
RUN;

** 3a) CODE AD8_SCORE **;

DATA NHATSR5_SP (drop=i);
  SET NHATSR5_SP;
  array r5think {*} cp5chgthink1-cp5chgthink8; ** QUESTIONNAIRE ITEMS **;
  array r5ad8item {*} r5ad8_1-r5ad8_8;
  array r5ad8miss {*} r5ad8miss_1-r5ad8miss_8;
  r5ad8_score =-1;
  r5ad8_miss =-1;

  do i=1 to dim(r5ad8item);
  ** INITIALIZE COUNTS TO NOT APPLICABLE**;
  r5ad8item{i}=-1;
  r5ad8miss{i}=-1;
  ** ASSIGN VALUES TO AD8 ITEMS IF PROXY AND DEMENTIA CLASS NOT ALREADY
  ASSIGNED BY REPORTED DIAGNOSIS **;
  if is5resptype=2 and r5demclas=. then do;
  r5ad8item{i}=.;
  if r5think{i} in (1,3) then r5ad8item{i}=1; ** PROXY REPORTS A CHANGE OR
  ALZ/DEMENTIA **;
  else if r5think{i}=2 then r5ad8item{i}=0; ** PROXY REPORTS NO CHANGE **;
  r5ad8_score=sum(of r5ad8item{*}); ** COUNT AD8 ITEMS **;

  if r5ad8item{i} in (0,1) then r5ad8miss{i}=0;
  else if r5ad8item{i}=. then r5ad8miss{i}=1;
  r5ad8_miss=sum(of r5ad8miss{*}); ** COUNT MISSING AD8 ITEMS **;
  end;
  end;

RUN;

TITLE;
PROC PRINT DATA = NHATSR5_SP (OBS=50);
  WHERE r5ad8_score > 0;
  VAR SPID r5ad8_1-r5ad8_8 r5ad8_score r5ad8miss_1-r5ad8miss_8 r5ad8_miss;
RUN;

** 3b) CODE AD8 DEMENTIA CLASS **;

DATA NHATSR5_SP;
  SET NHATSR5_SP;
```

## SAS ALGORITHM FOR DEMENTIA

```
if cp5dad8dem=1 and is5resptype=2 and r5demclas=. then r5ad8_score=8;
if r5ad8_score>=2 then r5ad8_dem=1 ; ** IF SCORE >=2 THEN MEETS AD8
CRITERION **;
if r5ad8_score in (0,1) or (r5ad8_miss=8 and r5ad8_dem=.) then r5ad8_dem=2;
** IF SCORE IS 0 OR 1 OR ALL ITEMS MISSING THEN DOES NOT MEET AD8 CRITERION
**;
RUN;

TITLE;
PROC PRINT DATA = NHATSR5_SP (OBS=50);
FORMAT r5ad8_dem r5ad8dem. ;
WHERE r5ad8_score >= 2;
VAR SPID r5ad8_score r5ad8_miss r5ad8_dem;
RUN;

** 4) UPDATE DEMENTIA CLASSIFICATION VARIABLE WITH AD8 CLASS **;

DATA NHATSR5_SP;
SET NHATSR5_SP;
if r5demclas=. then do;
if r5ad8_dem=1 then r5demclas=1; ** PROBABLE BASED ON AD8 SCORE **;
if r5ad8_dem=2 and cg5speaktosp=2 then r5demclas=3; ** NO DIAGNOSIS, DOES NOT
MEET AD8 CRITERION, AND PROXY SAYS CANNOT ASK SP COGNITIVE ITEMS **;
end;
RUN;

TITLE;
PROC FREQ DATA = NHATSR5_SP (OBS = 50);
FORMAT r5ad8_dem r5ad8dem. r5demclas r5demclas.;
TABLES r5ad8_dem*cg5speaktosp*r5demclas/LIST MISSING NOCOL NOROW NOPERCENT;
RUN;

** 5) CODE DATE ITEMS AND COUNT **;

DATA NHATSR5_SP (drop=i);
SET NHATSR5_SP;
array cg5date {*} cg5todaydat1-cg5todaydat4; **USE THIS LINE FOR ROUNDS 1-3,
5 and forward**;
*array cg4date {*} cg4todaydat1 cg4todaydat2 cg4todaydat3 cg4todaydat5;
**USE THIS LINE FOR ROUND 4**;
array r5date_item {*} r5date_mon r5date_day r5date_yr r5date_dow;

do i=1 to dim(r5date_item);
if cg5date{i} > 0 then r5date_item{i}=cg5date{i}; *** CODE ONLY YES/NO
RESPONSES: MISSING/N.A. CODES -1,-9 LEFT MISSING **;
if cg5date{i} in (-7,2) then r5date_item{i}=0; ** 2:NO/DK OR -7:REFUSED
RECODED TO 0:NO/DK/RF**;
r5date_sum=sum(of r5date_item{*}); ** COUNT CORRECT DATE ITEMS**;
end;

if r5date_sum=. then do;
if cg5speaktosp=2 then r5date_sum=-2; ** PROXY SAYS CAN'T SPEAK TO SP **;
```



## SAS ALGORITHM FOR DEMENTIA

```
else if cg5speaktosp=1 and max(of cg5date{*)=-1 then r5date_sum=-3; ** PROXY
SAYS CAN SPEAK TO SP BUT SP UNABLE TO ANSWER **;
end;
r5date_sumr=r5date_sum;
if r5date_sum=-2 then r5date_sumr=.; ** MISSING IF PROXY SAYS CAN'T SPEAK TO
SP**;
else if r5date_sum=-3 then r5date_sumr=0; ** 0 IF SP UNABLE TO ANSWER **;
RUN;
```

```
** 6) PRESIDENT AND VICE PRESIDENT NAME ITEMS AND COUNT **;
```

```
DATA NHATSR5_SP (drop=i);
  SET NHATSR5_SP;
  array cg5pres {*} cg5presidna1 cg5presidna3 cg5vpname1 cg5vpname3;
  array r5pres_item {*} r5preslast r5presfirst r5vplast r5vpfirst;

do i=1 to dim(r5pres_item);
  if cg5pres{i} > 0 then r5pres_item{i}=cg5pres{i}; ** CODE ONLY YES/NO
RESPONSES: MISSING/N.A. CODES -1,-9 LEFT MISSING **;
  if cg5pres{i} in (-7,2) then r5pres_item{i}=0; ** 2:NO/DK OR -7:REFUSED
RECODED TO 0:NO/DK/RF **;
  r5presvp=sum(of r5pres_item{*}); ** COUNT CORRECT PRESIDENT/VEEP NAME ITEMS
**;
end;
if r5presvp=. then do;
  if cg5speaktosp=2 then r5presvp=-2; ** PROXY SAYS CAN'T SPEAK TO SP **;
  else if cg5speaktosp=1 and max(of cg5pres{*)=-1 then r5presvp=-3; ** PROXY
SAYS CAN SPEAK TO SP BUT SP UNABLE TO ANSWER **;
end;
r5presvpr=r5presvp;
if r5presvp=-2 then r5presvpr=.; ** MISSING IF PROXY SAYS CAN'T SPEAK TO SP
**;
else if r5presvp=-3 then r5presvpr=0; ** 0 IF SP UNABLE TO ANSWER **;
RUN;
```

```
** 7) ORIENTATION DOMAIN: SUM OF DATE RECALL AND PRESIDENT NAMING **;
```

```
DATA NHATSR5_SP;
  SET NHATSR5_SP;
  r5date_prvp=sum(r5date_sumr,r5presvpr);
  RUN;
```

```
TITLE;
```

```
PROC PRINT DATA = NHATSR5_SP (OBS=50);
  VAR r5date_sumr r5presvpr r5date_prvp;
  RUN;
```

```
** 8) EXECUTIVE FUNCTION DOMAIN: CLOCK DRAWING SCORE **;
```

```
DATA NHATSR5_SP;
  SET NHATSR5_SP;
  r5clock_scorer=cg5dclkdraw;
  if cg5dclkdraw in (-2,-9) then r5clock_scorer=.
```

## SAS ALGORITHM FOR DEMENTIA

```
if cg5dclkdraw in (-3,-4,-7) then r5clock_scorer=0;
** IMPUTE MEAN SCORE TO PERSONS MISSING A CLOCK **;
if cg5dclkdraw=-9 and cg5speaktosp=1 then r5clock_scorer=2; ** IF PROXY SAID
CAN ASK SP **;
if cg5dclkdraw=-9 and cg5speaktosp=-1 then r5clock_scorer=3; ** IF SELF
RESPONDENT **;
RUN;
```

```
TITLE;
PROC PRINT DATA = NHATSR5_SP (OBS=50);
VAR cg5dclkdraw cg5speaktosp r5clock_scorer;
RUN;
```

```
** 9) MEMORY DOMAIN: IMMEDIATE AND DELAYED WORD RECALL **;
```

```
DATA NHATSR5_SP (drop=i);
SET NHATSR5_SP;
array cg5recall {*} cg5dwrddlyrc cg5dwrddlyrc;
array r5word_recall {*} r5irecall r5drecall;
do i=1 to dim(r5word_recall);
r5word_recall{i}=cg5recall{i};
*if cg4recall{i} in (-2,-1) then r4word_recall{i}=.;
*if cg4recall{i} in (-7,-3) then r4word_recall{i}=0;
**SET CASES WITH MISSING WORD LIST AND NOT PREVIOUSLY ASSIGNED TO MISSING
(ROUND 5 ONLY)**;
if cg5dwrddlyrc=-9 then r5word_recall{i}=.;
if cg5recall{i} in (-7,-3) then r5word_recall{i}=0;
r5wordrecall10_20=sum(of r5word_recall{*});
end;
RUN;
```

```
TITLE;
PROC PRINT DATA = NHATSR5_SP (OBS = 50);
VAR cg5dwrddlyrc cg5dwrddlyrc r5irecall r5drecall r5wordrecall10_20;
RUN;
```

```
** 10) CREATE COGNITIVE DOMAINS FOR ALL ELIGIBLE **;
** I.E. PROXY BUT PROXY SAYS CAN ASK SP, NOT FQ ONLY, NOT NH **;
```

```
DATA NHATSR5_SP;
SET NHATSR5_SP;
if 1 < r5clock_scorer <=5 then r5clock65=0;
if 0 <= r5clock_scorer <=1 then r5clock65=1;
if 3 < r5wordrecall10_20 <=20 then r5word65=0;
if 0 <= r5wordrecall10_20 <=3 then r5word65=1;
if 3 < r5date_prvp <= 8 then r5datena65=0;
if 0 <= r5date_prvp <= 3 then r5datena65=1;
RUN;
```

```
TITLE;
PROC PRINT DATA = NHATSR5_SP (OBS=50);
```

## SAS ALGORITHM FOR DEMENTIA

```
VAR r5clock_scorer r5clock65 r5wordrecall10_20 r5word65 r5date_prvp
r5datena65;
RUN;

** 10) CREATE COGNITIVE DOMAIN SCORE **;

DATA NHATSR5_SP (drop=i);
SET NHATSR5_SP;
array r5domains {*} r5clock65 r5word65 r5datena65;
do i=1 to dim(r5domains);
r5domain65=sum(of r5domains{*});
end;
**SET CASES WITH MISSING WORD LIST AND NOT PREVIOUSLY ASSIGNED TO MISSING
(ROUND 5 ONLY)**;
if cg5dwrldlstm=-9 and r5demclas=. then r5demclas=-9;

RUN;

TITLE;
PROC PRINT DATA = NHATSR5_SP (OBS=50);
VAR r5clock65 r5word65 r5datena65 r5domain65;
RUN;

** 11) UPDATE COGNITIVE CLASSIFICATION **;

DATA NHATSR5_SP;
SET NHATSR5_SP;
if r5demclas=. and cg5speaktosp in (-1,1) then do;
if 2 <= r5domain65 <=3 then r5demclas=1; ** PROBABLE DEMENTIA **;
if r5domain65 =1 then r5demclas=2; ** POSSIBLE DEMENTIA **;
if r5domain65 =0 then r5demclas=3; ** NO DEMENTIA **;
end;

RUN;

TITLE;
PROC PRINT DATA = NHATSR5_SP (OBS=50);
FORMAT r5demclas r5demclas.;
VAR SPID cg5dwrddimrc cg5dwrddlyrc cg5dwrddimrc r5dresid hc5disescn9
is5resptype cg5speaktosp r5domain65 r5demclas;
RUN;

TITLE;
PROC PRINT DATA = NHATSR5_SP (OBS=50);
FORMAT r5demclas r5demclas.;
VAR SPID r5demclas r5dresid r5dlmlint;
RUN;

TITLE;
PROC FREQ DATA = NHATSR5_SP ;
```

## SAS ALGORITHM FOR DEMENTIA

```
TABLES r5dresid*r5dlmlint/LIST MISSING;  
RUN;
```

```
TITLE;  
PROC PRINT DATA = NHATSR5_SP;  
  FORMAT r5demclas r5demclas.;  
  WHERE r5dresid = 6 OR r5dlmlint = 1;  
  VAR SPID r5demclas r5dresid r5dlmlint;  
RUN;
```

```
DATA NHATSR5_SP;  
  SET NHATSR5_SP;  
  DROP r5ad8_dem r5ad8_1-r5ad8_8 r5ad8miss_1-r5ad8miss_8 r5ad8_score  
r5ad8_miss  
r5date_mon r5date_day r5date_yr r5date_dow r5date_sum r5date_sumr  
r5preslast r5presfirst r5vplast r5vpfirst r5presvp r5presvpr r5date_prvp  
r5clock_scorer r5irecall r5drecall r5wordrecall0_20  
r5clock65 r5word65 r5datena65 r5domain65;  
RUN;
```

```
** NOTE: The input file to run this code is the NHATS_Round_6_SP_File**  
** FORMATS FOR CONSTRUCTED VARIABLES **;
```

```
proc format;  
value r6demclas  
1="1:Probable dementia"  
2="2:Possible dementia"  
3="3:No dementia"  
-1="-1:Deceased or nursing home resident"  
-9="-9:Missing"  
;  
value r6ad8dem  
1="1:Meets dementia criteria"  
2="2:Does not meet dementia criteria"  
;  
value r6clockf  
0-1="0-1:Impaired"  
2-5="2-5:Not impaired"  
;  
value r6wordrecf  
0-3="0-3: Impaired "  
4-20="4-20: Not impaired "  
;  
value r6dateprf  
0-3="0-3: Impaired "  
4-8="4-8: Not impaired "  
;  
RUN;
```

## SAS ALGORITHM FOR DEMENTIA

```
** DATE STEP CODE FOR CREATING DEMENTIA CLASSIFICATION VARIABLE **;  
  
DATA NHATSR6_SP;  
  SET NHATSR6_SP;  
  length r6demclas  
  r6ad8_dem r6ad8_1-r6ad8_8 r6ad8miss_1-r6ad8miss_8 r6ad8_score r6ad8_miss  
  r6date_mon r6date_day r6date_yr r6date_dow r6date_sum r6date_sumr  
  r6preslast r6presfirst r6vpplast r6vpfirst r6presvp r6presvpr r6date_prvp  
  r6clock_scorer r6irecall r6drecall r6wordrecall0_20  
  r6clock65 r6word65 r6datena65 r6domain65  
3;  
label r6demclas="R6 NHATS Dementia Classification 65+";  
  
*if cg2dwrddimmrc = 10 and cg2dwrddlyrc = -3 then cg2dwrddimmrc = -3; **USE  
THIS LINE TO FIX A CODING ERROR IN ROUND 2 ONLY**;  
RUN;  
  
** 1) SET MISSING (RESIDENTIAL CARE FQ ONLY) AND N.A. (NURSING HOME  
RESIDENTS, DECEASED) **;  
  
DATA NHATSR6_SP;  
  SET NHATSR6_SP;  
  if r6dresid in (3,5,7) then r6demclas=-9;  
  if r6dresid in (6,8) then r6demclas=-1;  
RUN;  
  
TITLE;  
PROC FREQ DATA = NHATSR6_SP;  
  FORMAT r6demclas r6demclas.;  
  TABLES r6dresid*r6demclas/LIST MISSING NOCOL NOROW NOPERCENT;  
RUN;  
  
** 2) CODE PROBABLE IF DEMENTIA DIAGNOSIS REPORTED BY SELF OR PROXY **;  
  
DATA NHATSR6_SP;  
  SET NHATSR6_SP;  
  if hc6disescn9 in (1,7) and is6resptype in (1,2) then r6demclas=1;  
RUN;  
  
TITLE;  
PROC FREQ DATA = NHATSR6_SP;  
  FORMAT r6demclas r6demclas.;  
  TABLES r6dresid*r6demclas/LIST MISSING NOCOL NOROW NOPERCENT;  
  TABLES r6dresid*hc6disescn9*is6resptype*r6demclas/LIST MISSING NOCOL NOROW  
NOPERCENT;  
RUN;  
  
** 3a) CODE AD8_SCORE **;  
  
DATA NHATSR6_SP (drop=i);  
  SET NHATSR6_SP;  
  array r6think {*} cp6chgthink1-cp6chgthink8; ** QUESTIONNAIRE ITEMS **;
```

## SAS ALGORITHM FOR DEMENTIA

```
array r6ad8item {*} r6ad8_1-r6ad8_8;
array r6ad8miss {*} r6ad8miss_1-r6ad8miss_8;
r6ad8_score =-1;
r6ad8_miss =-1;

do i=1 to dim(r6ad8item);
** INITIALIZE COUNTS TO NOT APPLICABLE**;
r6ad8item{i}=-1;
r6ad8miss{i}=-1;
** ASSIGN VALUES TO AD8 ITEMS IF PROXY AND DEMENTIA CLASS NOT ALREADY
ASSIGNED BY REPORTED DIAGNOSIS **;
if is6resptype=2 and r6demclas=. then do;
r6ad8item{i}=.;
if r6think{i} in (1,3) then r6ad8item{i}=1; ** PROXY REPORTS A CHANGE OR
ALZ/DEMENTIA **;
else if r6think{i}=2 then r6ad8item{i}=0; ** PROXY REPORTS NO CHANGE **;
r6ad8_score=sum(of r6ad8item{*}); ** COUNT AD8 ITEMS **;

if r6ad8item{i} in (0,1) then r6ad8miss{i}=0;
else if r6ad8item{i}=. then r6ad8miss{i}=1;
r6ad8_miss=sum(of r6ad8miss{*}); ** COUNT MISSING AD8 ITEMS **;
end;
end;

RUN;

TITLE;
PROC PRINT DATA = NHATSR6_SP (OBS=50);
WHERE r6ad8_score > 0;
VAR SPID r6ad8_1-r6ad8_8 r6ad8_score r6ad8miss_1-r6ad8miss_8 r6ad8_miss;
RUN;

** 3b) CODE AD8 DEMENTIA CLASS **;

DATA NHATSR6_SP;
SET NHATSR6_SP;
if cp6dad8dem=1 and is6resptype=2 and r6demclas=. then r6ad8_score=8;
if r6ad8_score>=2 then r6ad8_dem=1 ; ** IF SCORE >=2 THEN MEETS AD8
CRITERION **;
if r6ad8_score in (0,1) or (r6ad8_miss=8 and r6ad8_dem=.) then r6ad8_dem=2;
** IF SCORE IS 0 OR 1 OR ALL ITEMS MISSING THEN DOES NOT MEET AD8 CRITERION
**;
RUN;

TITLE;
PROC PRINT DATA = NHATSR6_SP (OBS=50);
FORMAT r6ad8_dem r6ad8dem. ;
WHERE r6ad8_score >= 2;
VAR SPID r6ad8_score r6ad8_miss r6ad8_dem;
RUN;

** 4) UPDATE DEMENTIA CLASSIFICATION VARIABLE WITH AD8 CLASS **;
```

## SAS ALGORITHM FOR DEMENTIA

```
DATA NHATSR6_SP;
  SET NHATSR6_SP;
  if r6demclas=. then do;
  if r6ad8_dem=1 then r6demclas=1; ** PROBABLE BASED ON AD8 SCORE **;
  if r6ad8_dem=2 and cg6speaktosp=2 then r6demclas=3; ** NO DIAGNOSIS, DOES NOT
  MEET AD8 CRITERION, AND PROXY SAYS CANNOT ASK SP COGNITIVE ITEMS **;
  end;
RUN;
```

```
TITLE;
PROC FREQ DATA = NHATSR6_SP (OBS = 50);
  FORMAT r6ad8_dem r6ad8dem. r6demclas r6demclas.;
  TABLES r6ad8_dem*cg6speaktosp*r6demclas/LIST MISSING NOCOL NOROW NOPERCENT;
RUN;
```

```
** 5) CODE DATE ITEMS AND COUNT **;
```

```
DATA NHATSR6_SP (drop=i);
  SET NHATSR6_SP;
  array cg6date {*} cg6todaydat1-cg6todaydat4; **USE THIS LINE FOR ROUNDS 1-3,
  5 and forward**;
  *array cg4date {*} cg4todaydat1 cg4todaydat2 cg4todaydat3 cg4todaydat5;
  **USE THIS LINE FOR ROUND 4**;
  array r6date_item {*} r6date_mon r6date_day r6date_yr r6date_dow;
```

```
do i=1 to dim(r6date_item);
  if cg6date{i} > 0 then r6date_item{i}=cg6date{i}; *** CODE ONLY YES/NO
  RESPONSES: MISSING/N.A. CODES -1,-9 LEFT MISSING **;
  if cg6date{i} in (-7,2) then r6date_item{i}=0; ** 2:NO/DK OR -7:REFUSED
  RECODED TO 0:NO/DK/RF**;
  r6date_sum=sum(of r6date_item{*}); ** COUNT CORRECT DATE ITEMS**;
end;
```

```
if r6date_sum=. then do;
  if cg6speaktosp=2 then r6date_sum=-2; ** PROXY SAYS CAN'T SPEAK TO SP **;
  else if cg6speaktosp=1 and max(of cg6date{*})=-1 then r6date_sum=-3; ** PROXY
  SAYS CAN SPEAK TO SP BUT SP UNABLE TO ANSWER **;
end;
r6date_sumr=r6date_sum;
if r6date_sum=-2 then r6date_sumr=.; ** MISSING IF PROXY SAYS CAN'T SPEAK TO
  SP**;
else if r6date_sum=-3 then r6date_sumr=0; ** 0 IF SP UNABLE TO ANSWER **;
RUN;
```

```
** 6) PRESIDENT AND VICE PRESIDENT NAME ITEMS AND COUNT **;
```

```
DATA NHATSR6_SP (drop=i);
  SET NHATSR6_SP;
  array cg6pres {*} cg6presidna1 cg6presidna3 cg6vpname1 cg6vpname3;
  array r6pres_item {*} r6preslast r6presfirst r6vplast r6vpfirst;
```

```
do i=1 to dim(r6pres_item);
  if cg6pres{i} > 0 then r6pres_item{i}=cg6pres{i}; ** CODE ONLY YES/NO
  RESPONSES: MISSING/N.A. CODES -1,-9 LEFT MISSING **;
```

## SAS ALGORITHM FOR DEMENTIA

```
if cg6pres{i} in (-7,2) then r6pres_item{i}=0; ** 2:NO/DK OR -7:REFUSED
RECODED TO 0:NO/DK/RF **;
r6presvp=sum(of r6pres_item{*}); ** COUNT CORRECT PRESIDENT/VEEP NAME ITEMS
**;
end;
if r6presvp=. then do;
if cg6speaktosp=2 then r6presvp=-2; ** PROXY SAYS CAN'T SPEAK TO SP **;
else if cg6speaktosp=1 and max(of cg6pres{*})=-1 then r6presvp=-3; ** PROXY
SAYS CAN SPEAK TO SP BUT SP UNABLE TO ANSWER **;
end;
r6presvpr=r6presvp;
if r6presvp=-2 then r6presvpr=.; ** MISSING IF PROXY SAYS CAN'T SPEAK TO SP
**;
else if r6presvp=-3 then r6presvpr=0; ** 0 IF SP UNABLE TO ANSWER **;
RUN;
```

\*\* 7) ORIENTATION DOMAIN: SUM OF DATE RECALL AND PRESIDENT NAMING \*\*;

```
DATA NHATSR6_SP;
SET NHATSR6_SP;
r6date_prvp=sum(r6date_sumr,r6presvpr);
RUN;
```

```
TITLE;
PROC PRINT DATA = NHATSR6_SP (OBS=50);
VAR r6date_sumr r6presvpr r6date_prvp;
RUN;
```

\*\* 8) EXECUTIVE FUNCTION DOMAIN: CLOCK DRAWING SCORE \*\*;

```
DATA NHATSR6_SP;
SET NHATSR6_SP;
r6clock_scorer=cg6dclkdraw;
if cg6dclkdraw in (-2,-9) then r6clock_scorer=.;
if cg6dclkdraw in (-3,-4,-7) then r6clock_scorer=0;
** IMPUTE MEAN SCORE TO PERSONS MISSING A CLOCK **;
if cg6dclkdraw=-9 and cg6speaktosp=1 then r6clock_scorer=2; ** IF PROXY SAID
CAN ASK SP **;
if cg6dclkdraw=-9 and cg6speaktosp=-1 then r6clock_scorer=3; ** IF SELF
RESPONDENT **;
RUN;
```

```
TITLE;
PROC PRINT DATA = NHATSR6_SP (OBS=50);
VAR cg6dclkdraw cg6speaktosp r6clock_scorer;
RUN;
```

\*\* 9) MEMORY DOMAIN: IMMEDIATE AND DELAYED WORD RECALL \*\*;

```
DATA NHATSR6_SP (drop=i);
SET NHATSR6_SP;
array cg6recall {*} cg6dwrddimmrc cg6dwrddlyrc;
```



## SAS ALGORITHM FOR DEMENTIA

```
array r6word_recall {*} r6irecall r6drecall;
do i=1 to dim(r6word_recall);
r6word_recall{i}=cg6recall{i};
if cg6recall{i} in (-2,-1) then r6word_recall{i}=.;
if cg6recall{i} in (-7,-3) then r6word_recall{i}=0;
**SET CASES WITH MISSING WORD LIST AND NOT PREVIOUSLY ASSIGNED TO MISSING
(ROUND 5 ONLY)**;
*if cg5dwrddimmrc=-9 then r5word_recall{i}=.;
r6wordrecall10_20=sum(of r6word_recall{*});
end;
RUN;
```

```
TITLE;
PROC PRINT DATA = NHATSR6_SP (OBS = 50);
VAR cg6dwrddimmrc cg6dwrddlyrc r6irecall r6drecall r6wordrecall10_20;
RUN;
```

```
** 10) CREATE COGNITIVE DOMAINS FOR ALL ELIGIBLE **;
** I.E. PROXY BUT PROXY SAYS CAN ASK SP, NOT FQ ONLY, NOT NH **;
```

```
DATA NHATSR6_SP;
SET NHATSR6_SP;
if 1 < r6clock_scorer <=5 then r6clock65=0;
if 0 <= r6clock_scorer <=1 then r6clock65=1;
if 3 < r6wordrecall10_20 <=20 then r6word65=0;
if 0 <= r6wordrecall10_20 <=3 then r6word65=1;
if 3 < r6date_prvp <= 8 then r6datena65=0;
if 0 <= r6date_prvp <= 3 then r6datena65=1;
RUN;
```

```
TITLE;
PROC PRINT DATA = NHATSR6_SP (OBS=50);
VAR r6clock_scorer r6clock65 r6wordrecall10_20 r6word65 r6date_prvp
r6datena65;
RUN;
```

```
** 10) CREATE COGNITIVE DOMAIN SCORE **;
```

```
DATA NHATSR6_SP (drop=i);
SET NHATSR6_SP;
array r6domains {*} r6clock65 r6word65 r6datena65;
do i=1 to dim(r6domains);
r6domain65=sum(of r6domains{*});
end;
**SET CASES WITH MISSING WORD LIST AND NOT PREVIOUSLY ASSIGNED TO MISSING
(ROUND 5 ONLY)**;
*if cg5dwrddlstm=-9 and r5demclas=. then r5demclas=-9;
RUN;
```

```
TITLE;
PROC PRINT DATA = NHATSR6_SP (OBS=50);
```

## SAS ALGORITHM FOR DEMENTIA

```
VAR r6clock65 r6word65 r6datena65 r6domain65;  
RUN;
```

```
** 11) UPDATE COGNITIVE CLASSIFICATION **;
```

```
DATA NHATSR6_SP;  
SET NHATSR6_SP;  
if r6demclas=. and cg6speaktosp in (-1,1) then do;  
if 2 <= r6domain65 <=3 then r6demclas=1; ** PROBABLE DEMENTIA **;  
if r6domain65 =1 then r6demclas=2; ** POSSIBLE DEMENTIA **;  
if r6domain65 =0 then r6demclas=3; ** NO DEMENTIA **;  
end;
```

```
RUN;
```

```
TITLE;  
PROC PRINT DATA = NHATSR6_SP (OBS=50);  
FORMAT r6demclas r6demclas.;  
VAR SPID cg6dwrddimrc cg6dwrddlyrc cg6dwrddimrc r6dresid hc6disescn9  
is6resptype cg6speaktosp r6domain65 r6demclas;  
RUN;
```

```
TITLE;  
PROC PRINT DATA = NHATSR6_SP (OBS=50);  
FORMAT r6demclas r6demclas.;  
VAR SPID r6demclas r6dresid r6dlmlint;  
RUN;
```

```
TITLE;  
PROC FREQ DATA = NHATSR6_SP ;  
TABLES r6dresid*r6dlmlint/LIST MISSING;  
RUN;
```

```
TITLE;  
PROC PRINT DATA = NHATSR6_SP;  
FORMAT r6demclas r6demclas.;  
WHERE r6dresid = 6 OR r6dlmlint = 1;  
VAR SPID r6demclas r6dresid r6dlmlint;  
RUN;
```

```
DATA NHATSR6_SP;  
SET NHATSR6_SP;  
DROP r6ad8_dem r6ad8_1-r6ad8_8 r6ad8miss_1-r6ad8miss_8 r6ad8_score  
r6ad8_miss  
r6date_mon r6date_day r6date_yr r6date_dow r6date_sum r6date_sumr  
r6preslast r6presfirst r6vpplast r6vpfirst r6presvp r6presvpr r6date_prvp  
r6clock_scorer r6irecall r6drecall r6wordrecall0_20  
r6clock65 r6word65 r6datena65 r6domain65;  
RUN;
```

## SAS ALGORITHM FOR DEMENTIA

```
** NOTE: The input file to run this code is the NHATS_Round_7_SP_File**  
** FORMATS FOR CONSTRUCTED VARIABLES **;
```

```
proc format;  
value r7demclas  
1="1:Probable dementia"  
2="2:Possible dementia"  
3="3:No dementia"  
-1="-1:Deceased or nursing home resident"  
-9="-9:Missing"  
;  
value r7ad8dem  
1="1:Meets dementia criteria"  
2="2:Does not meet dementia criteria"  
;  
value r7clockf  
0-1="0-1:Impaired"  
2-5="2-5:Not impaired"  
;  
value r7wordrecf  
0-3="0-3: Impaired "  
4-20="4-20: Not impaired "  
;  
value r7dateprf  
0-3="0-3: Impaired "  
4-8="4-8: Not impaired "  
;  
RUN;
```

```
** DATE STEP CODE FOR CREATING DEMENTIA CLASSIFICATION VARIABLE **;
```

```
DATA NHATSR7_SP;  
SET NHATSR7_SP;  
length r7demclas  
r7ad8_dem r7ad8_1-r7ad8_8 r7ad8miss_1-r7ad8miss_8 r7ad8_score r7ad8_miss  
r7date_mon r7date_day r7date_yr r7date_dow r7date_sum r7date_sumr  
r7preslast r7presfirst r7vplast r7vpfirst r7presvp r7presvpr r7date_prvp  
r7clock_scorer r7irecall r7drecall r7wordrecall0_20  
r7clock65 r7word65 r7datena65 r7domain65  
3;  
label r7demclas="R7 NHATS Dementia Classification 65+";  
  
*if cg2dwrddimrc = 10 and cg2dwrddlyrc = -3 then cg2dwrddimrc = -3; **USE  
THIS LINE TO FIX A CODING ERROR IN ROUND 2 ONLY**;  
RUN;
```

```
** 1) SET MISSING (RESIDENTIAL CARE FQ ONLY) AND N.A. (NURSING HOME  
RESIDENTS, DECEASED) **;
```

```
DATA NHATSR7_SP;  
SET NHATSR7_SP;  
if r7dresid in (3,5,7) then r7demclas=-9;
```

## SAS ALGORITHM FOR DEMENTIA

```
if r7dresid in (6,8) then r7demclas=-1;
RUN;
```

```
TITLE;
PROC FREQ DATA = NHATSR7_SP;
  FORMAT r7demclas r7demclas.;
  TABLES r7dresid*r7demclas/LIST MISSING NOCOL NOROW NOPERCENT;
RUN;
```

```
** 2) CODE PROBABLE IF DEMENTIA DIAGNOSIS REPORTED BY SELF OR PROXY **;
```

```
DATA NHATSR7_SP;
  SET NHATSR7_SP;
if hc7disescn9 in (1,7) and is7resptype in (1,2) then r7demclas=1;
RUN;
```

```
TITLE;
PROC FREQ DATA = NHATSR7_SP;
  FORMAT r7demclas r7demclas.;
  TABLES r7dresid*r7demclas/LIST MISSING NOCOL NOROW NOPERCENT;
  TABLES r7dresid*hc7disescn9*is7resptype*r7demclas/LIST MISSING NOCOL NOROW
NOPERCENT;
RUN;
```

```
** 3a) CODE AD8_SCORE **;
```

```
DATA NHATSR7_SP (drop=i);
  SET NHATSR7_SP;
array r7think {*} cp7chgthink1-cp7chgthink8; ** QUESTIONNAIRE ITEMS **;
array r7ad8item {*} r7ad8_1-r7ad8_8;
array r7ad8miss {*} r7ad8miss_1-r7ad8miss_8;
r7ad8_score = -1;
r7ad8_miss = -1;

do i=1 to dim(r7ad8item);
  ** INITIALIZE COUNTS TO NOT APPLICABLE**;
  r7ad8item{i}=-1;
  r7ad8miss{i}=-1;
  ** ASSIGN VALUES TO AD8 ITEMS IF PROXY AND DEMENTIA CLASS NOT ALREADY
  ASSIGNED BY REPORTED DIAGNOSIS **;
  if is7resptype=2 and r7demclas=. then do;
    r7ad8item{i}=.;
    if r7think{i} in (1,3) then r7ad8item{i}=1; ** PROXY REPORTS A CHANGE OR
    ALZ/DEMENTIA **;
    else if r7think{i}=2 then r7ad8item{i}=0; ** PROXY REPORTS NO CHANGE **;
    r7ad8_score=sum(of r7ad8item{*}); ** COUNT AD8 ITEMS **;

    if r7ad8item{i} in (0,1) then r7ad8miss{i}=0;
    else if r7ad8item{i}=. then r7ad8miss{i}=1;
    r7ad8_miss=sum(of r7ad8miss{*}); ** COUNT MISSING AD8 ITEMS **;
  end;
end;
```

## SAS ALGORITHM FOR DEMENTIA

```
RUN;
```

```
TITLE;
```

```
PROC PRINT DATA = NHATSR7_SP (OBS=50);  
  WHERE r7ad8_score > 0;  
  VAR SPID r7ad8_1-r7ad8_8 r7ad8_score r7ad8miss_1-r7ad8miss_8 r7ad8_miss;  
RUN;
```

```
** 3b) CODE AD8 DEMENTIA CLASS **;
```

```
DATA NHATSR7_SP;  
  SET NHATSR7_SP;  
  if cp7dad8dem=1 and is7resptype=2 and r7demclas=. then r7ad8_score=8;  
  if r7ad8_score>=2 then r7ad8_dem=1 ; ** IF SCORE >=2 THEN MEETS AD8  
CRITERION **;  
  if r7ad8_score in (0,1) or (r7ad8_miss=8 and r7ad8_dem=.) then r7ad8_dem=2;  
  ** IF SCORE IS 0 OR 1 OR ALL ITEMS MISSING THEN DOES NOT MEET AD8 CRITERION  
  **;  
RUN;
```

```
TITLE;
```

```
PROC PRINT DATA = NHATSR7_SP (OBS=50);  
  FORMAT r7ad8_dem r7ad8dem. ;  
  WHERE r7ad8_score >= 2;  
  VAR SPID r7ad8_score r7ad8_miss r7ad8_dem;  
RUN;
```

```
** 4) UPDATE DEMENTIA CLASSIFICATION VARIABLE WITH AD8 CLASS **;
```

```
DATA NHATSR7_SP;  
  SET NHATSR7_SP;  
  if r7demclas=. then do;  
  if r7ad8_dem=1 then r7demclas=1; ** PROBABLE BASED ON AD8 SCORE **;  
  if r7ad8_dem=2 and cg7speaktosp=2 then r7demclas=3; ** NO DIAGNOSIS, DOES NOT  
MEET AD8 CRITERION, AND PROXY SAYS CANNOT ASK SP COGNITIVE ITEMS **;  
  end;  
RUN;
```

```
TITLE;
```

```
PROC FREQ DATA = NHATSR7_SP (OBS = 50);  
  FORMAT r7ad8_dem r7ad8dem. r7demclas r7demclas. ;  
  TABLES r7ad8_dem*cg7speaktosp*r7demclas/LIST MISSING NOCOL NOROW NOPERCENT;  
RUN;
```

```
** 5) CODE DATE ITEMS AND COUNT **;
```

```
DATA NHATSR7_SP (drop=i);  
  SET NHATSR7_SP;  
  array cg7date {*} cg7todaydat1-cg7todaydat4; **USE THIS LINE FOR ROUNDS 1-3,  
5 and forward**;
```

## SAS ALGORITHM FOR DEMENTIA

```
*array cg4date {*} cg4todaydat1 cg4todaydat2 cg4todaydat3 cg4todaydat5;
**USE THIS LINE FOR ROUND 4**;
array r7date_item {*} r7date_mon r7date_day r7date_yr r7date_dow;

do i=1 to dim(r7date_item);
if cg7date{i} > 0 then r7date_item{i}=cg7date{i}; *** CODE ONLY YES/NO
RESPONSES: MISSING/N.A. CODES -1,-9 LEFT MISSING **;
if cg7date{i} in (-7,2) then r7date_item{i}=0; ** 2:NO/DK OR -7:REFUSED
RECODED TO 0:NO/DK/RF**;
r7date_sum=sum(of r7date_item{*}); ** COUNT CORRECT DATE ITEMS**;
end;

if r7date_sum=. then do;
if cg7speaktosp=2 then r7date_sum=-2; ** PROXY SAYS CAN'T SPEAK TO SP **;
else if cg7speaktosp=1 and max(of cg7date{*})=-1 then r7date_sum=-3; ** PROXY
SAYS CAN SPEAK TO SP BUT SP UNABLE TO ANSWER **;
end;
r7date_sumr=r7date_sum;
if r7date_sum=-2 then r7date_sumr=.; ** MISSING IF PROXY SAYS CAN'T SPEAK TO
SP**;
else if r7date_sum=-3 then r7date_sumr=0; ** 0 IF SP UNABLE TO ANSWER **;
RUN;

** 6) PRESIDENT AND VICE PRESIDENT NAME ITEMS AND COUNT **;

DATA NHATSR7_SP (drop=i);
SET NHATSR7_SP;
array cg7pres {*} cg7presidna1 cg7presidna3 cg7vpname1 cg7vpname3;
array r7pres_item {*} r7preslast r7presfirst r7vplast r7vpfirst;

do i=1 to dim(r7pres_item);
if cg7pres{i} > 0 then r7pres_item{i}=cg7pres{i}; ** CODE ONLY YES/NO
RESPONSES: MISSING/N.A. CODES -1,-9 LEFT MISSING **;
if cg7pres{i} in (-7,2) then r7pres_item{i}=0; ** 2:NO/DK OR -7:REFUSED
RECODED TO 0:NO/DK/RF **;
r7presvp=sum(of r7pres_item{*}); ** COUNT CORRECT PRESIDENT/VEEP NAME ITEMS
**;
end;
if r7presvp=. then do;
if cg7speaktosp=2 then r7presvp=-2; ** PROXY SAYS CAN'T SPEAK TO SP **;
else if cg7speaktosp=1 and max(of cg7pres{*})=-1 then r7presvp=-3; ** PROXY
SAYS CAN SPEAK TO SP BUT SP UNABLE TO ANSWER **;
end;
r7presvpr=r7presvp;
if r7presvp=-2 then r7presvpr=.; ** MISSING IF PROXY SAYS CAN'T SPEAK TO SP
**;
else if r7presvp=-3 then r7presvpr=0; ** 0 IF SP UNABLE TO ANSWER **;
RUN;

** 7) ORIENTATION DOMAIN: SUM OF DATE RECALL AND PRESIDENT NAMING **;

DATA NHATSR7_SP;
SET NHATSR7_SP;
r7date_prvp=sum(r7date_sumr,r7presvpr);
RUN;
```

## SAS ALGORITHM FOR DEMENTIA

```
TITLE;  
PROC PRINT DATA = NHATSR7_SP (OBS=50);  
VAR r7date_sumr r7presvpr r7date_prvp;  
RUN;
```

```
** 8) EXECUTIVE FUNCTION DOMAIN: CLOCK DRAWING SCORE **;
```

```
DATA NHATSR7_SP;  
SET NHATSR7_SP;  
r7clock_scorer=cg7dclkdraw;  
if cg7dclkdraw in (-2,-9) then r7clock_scorer=.;  
if cg7dclkdraw in (-3,-4,-7) then r7clock_scorer=0;  
** IMPUTE MEAN SCORE TO PERSONS MISSING A CLOCK **;  
if cg7dclkdraw=-9 and cg7speaktosp=1 then r7clock_scorer=2; ** IF PROXY SAID  
CAN ASK SP **;  
if cg7dclkdraw=-9 and cg7speaktosp=-1 then r7clock_scorer=3; ** IF SELF  
RESPONDENT **;  
RUN;
```

```
TITLE;  
PROC PRINT DATA = NHATSR7_SP (OBS=50);  
VAR cg7dclkdraw cg7speaktosp r7clock_scorer;  
RUN;
```

```
** 9) MEMORY DOMAIN: IMMEDIATE AND DELAYED WORD RECALL **;
```

```
DATA NHATSR7_SP (drop=i);  
SET NHATSR7_SP;  
array cg7recall {*} cg7dwrddimrc cg7dwrddlyrc;  
array r7word_recall {*} r7irecall r7drecall;  
do i=1 to dim(r7word_recall);  
r7word_recall{i}=cg7recall{i};  
if cg7recall{i} in (-2,-1) then r7word_recall{i}=.;  
if cg7recall{i} in (-7,-3) then r7word_recall{i}=0;  
**SET CASES WITH MISSING WORD LIST AND NOT PREVIOUSLY ASSIGNED TO MISSING  
(ROUND 5 ONLY)**;  
*if cg5dwrddimrc=-9 then r5word_recall{i}=.;  
r7wordrecall10_20=sum(of r7word_recall{*});  
end;  
RUN;
```

```
TITLE;  
PROC PRINT DATA = NHATSR7_SP (OBS = 50);  
VAR cg7dwrddimrc cg7dwrddlyrc r7irecall r7drecall r7wordrecall10_20;  
RUN;
```

```
** 10) CREATE COGNITIVE DOMAINS FOR ALL ELIGIBLE **;  
** I.E. PROXY BUT PROXY SAYS CAN ASK SP, NOT FQ ONLY, NOT NH **;
```

```
DATA NHATSR7_SP;
```

## SAS ALGORITHM FOR DEMENTIA

```
SET NHATSR7_SP;
if 1 < r7clock_scorer <=5 then r7clock65=0;
if 0 <= r7clock_scorer <=1 then r7clock65=1;
if 3 < r7wordrecall10_20 <=20 then r7word65=0;
if 0 <= r7wordrecall10_20 <=3 then r7word65=1;
if 3 < r7date_prvp <= 8 then r7datena65=0;
if 0 <= r7date_prvp <= 3 then r7datena65=1;
RUN;

TITLE;
PROC PRINT DATA = NHATSR7_SP (OBS=50);
VAR r7clock_scorer r7clock65 r7wordrecall10_20 r7word65 r7date_prvp
r7datena65;
RUN;

** 10) CREATE COGNITIVE DOMAIN SCORE **;

DATA NHATSR7_SP (drop=i);
SET NHATSR7_SP;
array r7domains {*} r7clock65 r7word65 r7datena65;
do i=1 to dim(r7domains);
r7domain65=sum(of r7domains{*});
end;
**SET CASES WITH MISSING WORD LIST AND NOT PREVIOUSLY ASSIGNED TO MISSING
(ROUND 5 ONLY)**;
*if cg5dwrddlstm=-9 and r5demclas=. then r5demclas=-9;

RUN;

TITLE;
PROC PRINT DATA = NHATSR7_SP (OBS=50);
VAR r7clock65 r7word65 r7datena65 r7domain65;
RUN;

** 11) UPDATE COGNITIVE CLASSIFICATION **;

DATA NHATSR7_SP;
SET NHATSR7_SP;
if r7demclas=. and cg7speaktosp in (-1,1) then do;
if 2 <= r7domain65 <=3 then r7demclas=1; ** PROBABLE DEMENTIA **;
if r7domain65 =1 then r7demclas=2; ** POSSIBLE DEMENTIA **;
if r7domain65 =0 then r7demclas=3; ** NO DEMENTIA **;
end;

RUN;

TITLE;
PROC PRINT DATA = NHATSR7_SP (OBS=50);
FORMAT r7demclas r7demclas.;
VAR SPID cg7dwrddimrc cg7dwrddlyrc cg7dwrddimrc r7dresid hc7disescn9
is7resptype cg7speaktosp r7domain65 r7demclas;
RUN;
```



## SAS ALGORITHM FOR DEMENTIA

```
TITLE;
PROC PRINT DATA = NHATSR7_SP (OBS=50);
  FORMAT r7demclas r7demclas.;
  VAR SPID r7demclas r7dresid r7dlmlint;
RUN;
```

```
TITLE;
PROC FREQ DATA = NHATSR7_SP ;
  TABLES r7dresid*r7dlmlint/LIST MISSING;
RUN;
```

```
TITLE;
PROC PRINT DATA = NHATSR7_SP;
  FORMAT r7demclas r7demclas.;
  WHERE r7dresid = 6 OR r7dlmlint = 1;
  VAR SPID r7demclas r7dresid r7dlmlint;
RUN;
```

```
DATA NHATSR7_SP;
  SET NHATSR7_SP;
  DROP r7ad8_dem r7ad8_1-r7ad8_8 r7ad8miss_1-r7ad8miss_8 r7ad8_score
r7ad8_miss
  r7date_mon r7date_day r7date_yr r7date_dow r7date_sum r7date_sumr
  r7preslast r7presfirst r7vpplast r7vpfirst r7presvp r7presvpr r7date_prvp
  r7clock_scorer r7irecall r7drecall r7wordrecall0_20
  r7clock65 r7word65 r7datena65 r7domain65;
RUN;
```

```
** NOTE: The input file to run this code is the NHATS_Round_8_SP_File**
** FORMATS FOR CONSTRUCTED VARIABLES **;
```

```
proc format;
value r8demclas
1="1:Probable dementia"
2="2:Possible dementia"
3="3:No dementia"
-1="-1:Deceased or nursing home resident"
-9="-9:Missing"
;
value r8ad8dem
1="1:Meets dementia criteria"
2="2:Does not meet dementia criteria"
;
value r8clockf
0-1="0-1:Impaired"
2-5="2-5:Not impaired"
;
value r8wordrecf
```

## SAS ALGORITHM FOR DEMENTIA

```
0-3="0-3: Impaired "  
4-20="4-20: Not impaired "  
;  
value r8dateprf  
0-3="0-3: Impaired "  
4-8="4-8: Not impaired "  
;  
RUN;  
  
** DATE STEP CODE FOR CREATING DEMENTIA CLASSIFICATION VARIABLE **;  
  
DATA NHATSR8_SP;  
  SET NHATSR8_SP;  
  length r8demclas  
  r8ad8_dem r8ad8_1-r8ad8_8 r8ad8miss_1-r8ad8miss_8 r8ad8_score r8ad8_miss  
  r8date_mon r8date_day r8date_yr r8date_dow r8date_sum r8date_sumr  
  r8preslast r8presfirst r8vplast r8vpfirst r8presvp r8presvpr r8date_prvp  
  r8clock_scorer r8irecall r8drecall r8wordrecall0_20  
  r8clock65 r8word65 r8datena65 r8domain65  
3;  
label r8demclas="R8 NHATS Dementia Classification 65+";  
  
*if cg2dwrddimrc = 10 and cg2dwrddlyrc = -3 then cg2dwrddimrc = -3; **USE  
THIS LINE TO FIX A CODING ERROR IN ROUND 2 ONLY**;  
RUN;  
  
** 1) SET MISSING (RESIDENTIAL CARE FQ ONLY) AND N.A. (NURSING HOME  
RESIDENTS, DECEASED) **;  
  
DATA NHATSR8_SP;  
  SET NHATSR8_SP;  
  if r8dresid in (3,5,7) then r8demclas=-9;  
  if r8dresid in (6,8) then r8demclas=-1;  
RUN;  
  
TITLE;  
PROC FREQ DATA = NHATSR8_SP;  
  FORMAT r8demclas r8demclas.;  
  TABLES r8dresid*r8demclas/LIST MISSING NOCOL NOROW NOPERCENT;  
RUN;  
  
** 2) CODE PROBABLE IF DEMENTIA DIAGNOSIS REPORTED BY SELF OR PROXY **;  
  
DATA NHATSR8_SP;  
  SET NHATSR8_SP;  
  if hc8disescn9 in (1,7) and is8resptype in (1,2) then r8demclas=1;  
RUN;  
  
TITLE;  
PROC FREQ DATA = NHATSR8_SP;  
  FORMAT r8demclas r8demclas.;  
  TABLES r8dresid*r8demclas/LIST MISSING NOCOL NOROW NOPERCENT;
```

## SAS ALGORITHM FOR DEMENTIA

```
TABLES r8dresid*hc8disescn9*is8resptype*r8demclas/LIST MISSING NOCOL NOROW  
NOPERCENT;  
RUN;
```

```
** 3a) CODE AD8_SCORE **;
```

```
DATA NHATSR8_SP (drop=i);  
  SET NHATSR8_SP;  
  array r8think {*} cp8chgthink1-cp8chgthink8; ** QUESTIONNAIRE ITEMS **;  
  array r8ad8item {*} r8ad8_1-r8ad8_8;  
  array r8ad8miss {*} r8ad8miss_1-r8ad8miss_8;  
  r8ad8_score =-1;  
  r8ad8_miss =-1;
```

```
do i=1 to dim(r8ad8item);  
  ** INITIALIZE COUNTS TO NOT APPLICABLE**;  
  r8ad8item{i}=-1;  
  r8ad8miss{i}=-1;  
  ** ASSIGN VALUES TO AD8 ITEMS IF PROXY AND DEMENTIA CLASS NOT ALREADY  
  ASSIGNED BY REPORTED DIAGNOSIS **;  
  if is8resptype=2 and r8demclas=. then do;  
    r8ad8item{i}=.;  
    if r8think{i} in (1,3) then r8ad8item{i}=1; ** PROXY REPORTS A CHANGE OR  
    ALZ/DEMENTIA **;  
    else if r8think{i}=2 then r8ad8item{i}=0; ** PROXY REPORTS NO CHANGE **;  
    r8ad8_score=sum(of r8ad8item{*}); ** COUNT AD8 ITEMS **;  
  
    if r8ad8item{i} in (0,1) then r8ad8miss{i}=0;  
    else if r8ad8item{i}=. then r8ad8miss{i}=1;  
    r8ad8_miss=sum(of r8ad8miss{*}); ** COUNT MISSING AD8 ITEMS **;  
  end;  
end;
```

```
RUN;
```

```
TITLE;  
PROC PRINT DATA = NHATSR8_SP (OBS=50);  
  WHERE r8ad8_score > 0;  
  VAR SPID r8ad8_1-r8ad8_8 r8ad8_score r8ad8miss_1-r8ad8miss_8 r8ad8_miss;  
RUN;
```

```
** 3b) CODE AD8 DEMENTIA CLASS **;
```

```
DATA NHATSR8_SP;  
  SET NHATSR8_SP;  
  if cp8dad8dem=1 and is8resptype=2 and r8demclas=. then r8ad8_score=8;  
  if r8ad8_score>=2 then r8ad8_dem=1; ** IF SCORE >=2 THEN MEETS AD8  
  CRITERION **;  
  if r8ad8_score in (0,1) or (r8ad8_miss=8 and r8ad8_dem=.) then r8ad8_dem=2;  
  ** IF SCORE IS 0 OR 1 OR ALL ITEMS MISSING THEN DOES NOT MEET AD8 CRITERION  
  **;  
RUN;
```

## SAS ALGORITHM FOR DEMENTIA

```
TITLE;
PROC PRINT DATA = NHATSR8_SP (OBS=50);
  FORMAT r8ad8_dem r8ad8dem. ;
  WHERE r8ad8_score >= 2;
  VAR SPID r8ad8_score r8ad8_miss r8ad8_dem;
RUN;

** 4) UPDATE DEMENTIA CLASSIFICATION VARIABLE WITH AD8 CLASS **;

DATA NHATSR8_SP;
  SET NHATSR8_SP;
  if r8demclas=. then do;
  if r8ad8_dem=1 then r8demclas=1; ** PROBABLE BASED ON AD8 SCORE **;
  if r8ad8_dem=2 and cg8speaktosp=2 then r8demclas=3; ** NO DIAGNOSIS, DOES NOT
MEET AD8 CRITERION, AND PROXY SAYS CANNOT ASK SP COGNITIVE ITEMS **;
  end;
RUN;

TITLE;
PROC FREQ DATA = NHATSR8_SP (OBS = 50);
  FORMAT r8ad8_dem r8ad8dem. r8demclas r8demclas.;
  TABLES r8ad8_dem*cg8speaktosp*r8demclas/LIST MISSING NOCOL NOROW NOPERCENT;
RUN;

** 5) CODE DATE ITEMS AND COUNT **;

DATA NHATSR8_SP (drop=i);
  SET NHATSR8_SP;
  array cg8date {*} cg8todaydat1-cg8todaydat4; **USE THIS LINE FOR ROUNDS 1-3,
5 and forward**;
  *array cg4date {*} cg4todaydat1 cg4todaydat2 cg4todaydat3 cg4todaydat5;
**USE THIS LINE FOR ROUND 4**;
  array r8date_item {*} r8date_mon r8date_day r8date_yr r8date_dow;

  do i=1 to dim(r8date_item);
  if cg8date{i} > 0 then r8date_item{i}=cg8date{i}; *** CODE ONLY YES/NO
RESPONSES: MISSING/N.A. CODES -1,-9 LEFT MISSING **;
  if cg8date{i} in (-7,2) then r8date_item{i}=0; ** 2:NO/DK OR -7:REFUSED
RECODED TO 0:NO/DK/RF**;
  r8date_sum=sum(of r8date_item{*}); ** COUNT CORRECT DATE ITEMS**;
  end;

  if r8date_sum=. then do;
  if cg8speaktosp=2 then r8date_sum=-2; ** PROXY SAYS CAN'T SPEAK TO SP **;
  else if cg8speaktosp=1 and max(of cg8date{*})=-1 then r8date_sum=-3; ** PROXY
SAYS CAN SPEAK TO SP BUT SP UNABLE TO ANSWER **;
  end;
  r8date_sumr=r8date_sum;
  if r8date_sum=-2 then r8date_sumr=.; ** MISSING IF PROXY SAYS CAN'T SPEAK TO
SP**;
  else if r8date_sum=-3 then r8date_sumr=0; ** 0 IF SP UNABLE TO ANSWER **;
RUN;
```

## SAS ALGORITHM FOR DEMENTIA

```
** 6) PRESIDENT AND VICE PRESIDENT NAME ITEMS AND COUNT **;  
  
DATA NHATSR8_SP (drop=i);  
  SET NHATSR8_SP;  
  array cg8pres {*} cg8presidna1 cg8presidna3 cg8vpname1 cg8vpname3;  
  array r8pres_item {*} r8preslast r8presfirst r8vplast r8vpfirst;  
  
do i=1 to dim(r8pres_item);  
  if cg8pres{i} > 0 then r8pres_item{i}=cg8pres{i}; ** CODE ONLY YES/NO  
  RESPONSES: MISSING/N.A. CODES -1,-9 LEFT MISSING **;  
  if cg8pres{i} in (-7,2) then r8pres_item{i}=0; ** 2:NO/DK OR -7:REFUSED  
  RECODED TO 0:NO/DK/RF **;  
  r8presvp=sum(of r8pres_item{*}); ** COUNT CORRECT PRESIDENT/VEEP NAME ITEMS  
  **;  
end;  
if r8presvp=. then do;  
  if cg8speaktosp=2 then r8presvp=-2; ** PROXY SAYS CAN'T SPEAK TO SP **;  
  else if cg8speaktosp=1 and max(of cg8pres{*})=-1 then r8presvp=-3; ** PROXY  
  SAYS CAN SPEAK TO SP BUT SP UNABLE TO ANSWER **;  
end;  
r8presvpr=r8presvp;  
if r8presvp=-2 then r8presvpr=.; ** MISSING IF PROXY SAYS CAN'T SPEAK TO SP  
**;  
else if r8presvp=-3 then r8presvpr=0; ** 0 IF SP UNABLE TO ANSWER **;  
RUN;
```

```
** 7) ORIENTATION DOMAIN: SUM OF DATE RECALL AND PRESIDENT NAMING **;
```

```
DATA NHATSR8_SP;  
  SET NHATSR8_SP;  
  r8date_prvp=sum(r8date_sumr,r8presvpr);  
  RUN;
```

```
TITLE;  
PROC PRINT DATA = NHATSR8_SP (OBS=50);  
  VAR r8date_sumr r8presvpr r8date_prvp;  
  RUN;
```

```
** 8) EXECUTIVE FUNCTION DOMAIN: CLOCK DRAWING SCORE **;
```

```
DATA NHATSR8_SP;  
  SET NHATSR8_SP;  
  r8clock_scorer=cg8dclkdraw;  
  if cg8dclkdraw in (-2,-9) then r8clock_scorer=.;  
  if cg8dclkdraw in (-3,-4,-7) then r8clock_scorer=0;  
  ** IMPUTE MEAN SCORE TO PERSONS MISSING A CLOCK **;  
  if cg8dclkdraw=-9 and cg8speaktosp=1 then r8clock_scorer=2; ** IF PROXY SAID  
  CAN ASK SP **;  
  if cg8dclkdraw=-9 and cg8speaktosp=-1 then r8clock_scorer=3; ** IF SELF  
  RESPONDENT **;  
  RUN;
```

```
TITLE;
```

## SAS ALGORITHM FOR DEMENTIA

```
PROC PRINT DATA = NHATSR8_SP (OBS=50);
  VAR cg8dclkdraw cg8speaktosp r8clock_scorer;
RUN;

** 9) MEMORY DOMAIN: IMMEDIATE AND DELAYED WORD RECALL **;

DATA NHATSR8_SP (drop=i);
  SET NHATSR8_SP;
  array cg8recall {*} cg8dwrddimrc cg8dwrddlyrc;
  array r8word_recall {*} r8irecall r8drecall;
do i=1 to dim(r8word_recall);
r8word_recall{i}=cg8recall{i};
if cg8recall{i} in (-2,-1) then r8word_recall{i}=.;
if cg8recall{i} in (-7,-3) then r8word_recall{i}=0;
**SET CASES WITH MISSING WORD LIST AND NOT PREVIOUSLY ASSIGNED TO MISSING
(ROUND 5 ONLY)**;
  *if cg5dwrddimrc=-9 then r5word_recall{i}=.;
r8wordrecall10_20=sum(of r8word_recall{*});
end;
RUN;

TITLE;
PROC PRINT DATA = NHATSR8_SP (OBS = 50);
  VAR cg8dwrddimrc cg8dwrddlyrc r8irecall r8drecall r8wordrecall10_20;
RUN;

** 10) CREATE COGNITIVE DOMAINS FOR ALL ELIGIBLE **;
** I.E. PROXY BUT PROXY SAYS CAN ASK SP, NOT FQ ONLY, NOT NH **;

DATA NHATSR8_SP;
  SET NHATSR8_SP;
  if 1 < r8clock_scorer <=5 then r8clock65=0;
  if 0 <= r8clock_scorer <=1 then r8clock65=1;
  if 3 < r8wordrecall10_20 <=20 then r8word65=0;
  if 0 <= r8wordrecall10_20 <=3 then r8word65=1;
  if 3 < r8date_prvp <= 8 then r8datena65=0;
  if 0 <= r8date_prvp <= 3 then r8datena65=1;
RUN;

TITLE;
PROC PRINT DATA = NHATSR8_SP (OBS=50);
  VAR r8clock_scorer r8clock65 r8wordrecall10_20 r8word65 r8date_prvp
r8datena65;
RUN;

** 10) CREATE COGNITIVE DOMAIN SCORE **;

DATA NHATSR8_SP (drop=i);
  SET NHATSR8_SP;
array r8domains {*} r8clock65 r8word65 r8datena65;
do i=1 to dim(r8domains);
r8domain65=sum(of r8domains{*});
```

## SAS ALGORITHM FOR DEMENTIA

```
end;
**SET CASES WITH MISSING WORD LIST AND NOT PREVIOUSLY ASSIGNED TO MISSING
(ROUND 5 ONLY)**;
*if cg5dwrdlstnm=-9 and r5demclas=. then r5demclas=-9;
```

```
RUN;
```

```
TITLE;
PROC PRINT DATA = NHATSR8_SP (OBS=50);
  VAR r8clock65 r8word65 r8datena65 r8domain65;
RUN;
```

```
** 11) UPDATE COGNITIVE CLASSIFICATION **;
```

```
DATA NHATSR8_SP;
  SET NHATSR8_SP;
  if r8demclas=. and cg8speaktosp in (-1,1) then do;
  if 2 <= r8domain65 <=3 then r8demclas=1; ** PROBABLE DEMENTIA **;
  if r8domain65 =1 then r8demclas=2; ** POSSIBLE DEMENTIA **;
  if r8domain65 =0 then r8demclas=3; ** NO DEMENTIA **;
end;
```

```
RUN;
```

```
TITLE;
PROC PRINT DATA = NHATSR8_SP (OBS=50);
  FORMAT r8demclas r8demclas.;
  VAR SPID cg8dwrddimrc cg8dwrddlyrc cg8dwrddimrc r8dresid hc8disescn9
is8resptype cg8speaktosp r8domain65 r8demclas;
RUN;
```

```
TITLE;
PROC PRINT DATA = NHATSR8_SP (OBS=50);
  FORMAT r8demclas r8demclas.;
  VAR SPID r8demclas r8dresid r8dlmlint;
RUN;
```

```
TITLE;
PROC FREQ DATA = NHATSR8_SP ;
  TABLES r8dresid*r8dlmlint/LIST MISSING;
RUN;
```

```
TITLE;
PROC PRINT DATA = NHATSR8_SP;
  FORMAT r8demclas r8demclas.;
  WHERE r8dresid = 6 OR r8dlmlint = 1;
  VAR SPID r8demclas r8dresid r8dlmlint;
RUN;
```

## SAS ALGORITHM FOR DEMENTIA

```
DATA NHATSR8_SP;
  SET NHATSR8_SP;
  DROP r8ad8_dem r8ad8_1-r8ad8_8 r8ad8miss_1-r8ad8miss_8 r8ad8_score
r8ad8_miss
r8date_mon r8date_day r8date_yr r8date_dow r8date_sum r8date_sumr
r8preslast r8presfirst r8vpplast r8vpfirst r8presvp r8presvpr r8date_prvp
r8clock_scorer r8irecall r8drecall r8wordrecall0_20
r8clock65 r8word65 r8datena65 r8domain65;
RUN;
```

```
** NOTE: The input file to run this code is the NHATS_Round_9_SP_File**
** FORMATS FOR CONSTRUCTED VARIABLES **;
```

```
proc format;
value r9demclas
1="1:Probable dementia"
2="2:Possible dementia"
3="3:No dementia"
-1="-1:Deceased or nursing home resident"
-9="-9:Missing"
;
value r9ad8dem
1="1:Meets dementia criteria"
2="2:Does not meet dementia criteria"
;
value r9clockf
0-1="0-1:Impaired"
2-5="2-5:Not impaired"
;
value r9wordrecf
0-3="0-3: Impaired "
4-20="4-20: Not impaired "
;
value r9dateprf
0-3="0-3: Impaired "
4-8="4-8: Not impaired "
;
RUN;
```

```
** DATE STEP CODE FOR CREATING DEMENTIA CLASSIFICATION VARIABLE **;
```

```
DATA NHATSR9_SP;
  SET NHATSR9_SP;
  length r9demclas
r9ad8_dem r9ad8_1-r9ad8_8 r9ad8miss_1-r9ad8miss_8 r9ad8_score r9ad8_miss
r9date_mon r9date_day r9date_yr r9date_dow r9date_sum r9date_sumr
r9preslast r9presfirst r9vpplast r9vpfirst r9presvp r9presvpr r9date_prvp
r9clock_scorer r9irecall r9drecall r9wordrecall0_20
r9clock65 r9word65 r9datena65 r9domain65
3;
label r9demclas="R9 NHATS Dementia Classification 65+";
```



## SAS ALGORITHM FOR DEMENTIA

```
*if cg2dwrddimrc = 10 and cg2dwrddlyrc = -3 then cg2dwrddimrc = -3; **USE  
THIS LINE TO FIX A CODING ERROR IN ROUND 2 ONLY**;
```

```
RUN;
```

```
** 1) SET MISSING (RESIDENTIAL CARE FQ ONLY) AND N.A. (NURSING HOME  
RESIDENTS, DECEASED) **;
```

```
DATA NHATSR9_SP;  
  SET NHATSR9_SP;  
  if r9dresid in (3,5,7) then r9demclas=-9;  
  if r9dresid in (6,8) then r9demclas=-1;  
RUN;
```

```
TITLE;  
PROC FREQ DATA = NHATSR9_SP;  
  FORMAT r9demclas r9demclas.;  
  TABLES r9dresid*r9demclas/LIST MISSING NOCOL NOROW NOPERCENT;  
RUN;
```

```
** 2) CODE PROBABLE IF DEMENTIA DIAGNOSIS REPORTED BY SELF OR PROXY **;
```

```
DATA NHATSR9_SP;  
  SET NHATSR9_SP;  
  if hc9disescn9 in (1,7) and is9resptype in (1,2) then r9demclas=1;  
RUN;
```

```
TITLE;  
PROC FREQ DATA = NHATSR9_SP;  
  FORMAT r9demclas r9demclas.;  
  TABLES r9dresid*r9demclas/LIST MISSING NOCOL NOROW NOPERCENT;  
  TABLES r9dresid*hc9disescn9*is9resptype*r9demclas/LIST MISSING NOCOL NOROW  
NOPERCENT;  
RUN;
```

```
** 3a) CODE AD8_SCORE **;
```

```
DATA NHATSR9_SP (drop=i);  
  SET NHATSR9_SP;  
  array r9think {*} cp9chgthink1-cp9chgthink8; ** QUESTIONNAIRE ITEMS **;  
  array r9ad8item {*} r9ad8_1-r9ad8_8;  
  array r9ad8miss {*} r9ad8miss_1-r9ad8miss_8;  
  r9ad8_score =-1;  
  r9ad8_miss =-1;
```

```
do i=1 to dim(r9ad8item);  
  ** INITIALIZE COUNTS TO NOT APPLICABLE**;  
  r9ad8item{i}=-1;  
  r9ad8miss{i}=-1;  
  ** ASSIGN VALUES TO AD8 ITEMS IF PROXY AND DEMENTIA CLASS NOT ALREADY  
ASSIGNED BY REPORTED DIAGNOSIS **;  
  if is9resptype=2 and r9demclas=. then do;  
    r9ad8item{i}=.;
```

## SAS ALGORITHM FOR DEMENTIA

```
if r9think{i} in (1,3) then r9ad8item{i}=1; ** PROXY REPORTS A CHANGE OR  
ALZ/DEMENTIA **;  
else if r9think{i}=2 then r9ad8item{i}=0; ** PROXY REPORTS NO CHANGE **;  
r9ad8_score=sum(of r9ad8item{*}); ** COUNT AD8 ITEMS **;
```

```
if r9ad8item{i} in (0,1) then r9ad8miss{i}=0;  
else if r9ad8item{i}=. then r9ad8miss{i}=1;  
r9ad8_miss=sum(of r9ad8miss{*}); ** COUNT MISSING AD8 ITEMS **;  
end;  
end;
```

**RUN;**

**TITLE;**

```
PROC PRINT DATA = NHATSR9_SP (OBS=50);  
WHERE r9ad8_score > 0;  
VAR SPID r9ad8_1-r9ad8_8 r9ad8_score r9ad8miss_1-r9ad8miss_8 r9ad8_miss;  
RUN;
```

**\*\* 3b) CODE AD8 DEMENTIA CLASS \*\*;**

```
DATA NHATSR9_SP;  
SET NHATSR9_SP;  
if cp9dad8dem=1 and is9resptype=2 and r9demclas=. then r9ad8_score=8;  
if r9ad8_score>=2 then r9ad8_dem=1; ** IF SCORE >=2 THEN MEETS AD8  
CRITERION **;  
if r9ad8_score in (0,1) or (r9ad8_miss=8 and r9ad8_dem=.) then r9ad8_dem=2;  
** IF SCORE IS 0 OR 1 OR ALL ITEMS MISSING THEN DOES NOT MEET AD8 CRITERION  
**;  
RUN;
```

**TITLE;**

```
PROC PRINT DATA = NHATSR9_SP (OBS=50);  
FORMAT r9ad8_dem r9ad8dem. ;  
WHERE r9ad8_score >= 2;  
VAR SPID r9ad8_score r9ad8_miss r9ad8_dem;  
RUN;
```

**\*\* 4) UPDATE DEMENTIA CLASSIFICATION VARIABLE WITH AD8 CLASS \*\*;**

```
DATA NHATSR9_SP;  
SET NHATSR9_SP;  
if r9demclas=. then do;  
if r9ad8_dem=1 then r9demclas=1; ** PROBABLE BASED ON AD8 SCORE **;  
if r9ad8_dem=2 and cg9speaktoSP=2 then r9demclas=3; ** NO DIAGNOSIS, DOES NOT  
MEET AD8 CRITERION, AND PROXY SAYS CANNOT ASK SP COGNITIVE ITEMS **;  
end;  
RUN;
```

**TITLE;**

```
PROC FREQ DATA = NHATSR9_SP (OBS = 50);  
FORMAT r9ad8_dem r9ad8dem. r9demclas r9demclas.;
```

## SAS ALGORITHM FOR DEMENTIA

```
TABLES r9ad8_dem*cg9speaktosp*r9demclas/LIST MISSING NOCOL NOROW NOPERCENT;  
RUN;
```

```
** 5) CODE DATE ITEMS AND COUNT **;
```

```
DATA NHATSR9_SP (drop=i);  
  SET NHATSR9_SP;  
  array cg9date {*} cg9todaydat1-cg9todaydat4; **USE THIS LINE FOR ROUNDS 1-3,  
  5 and forward**;  
  *array cg4date {*} cg4todaydat1 cg4todaydat2 cg4todaydat3 cg4todaydat5;  
  **USE THIS LINE FOR ROUND 4**;  
  array r9date_item {*} r9date_mon r9date_day r9date_yr r9date_dow;  
  
  do i=1 to dim(r9date_item);  
  if cg9date{i} > 0 then r9date_item{i}=cg9date{i}; *** CODE ONLY YES/NO  
  RESPONSES: MISSING/N.A. CODES -1,-9 LEFT MISSING **;  
  if cg9date{i} in (-7,2) then r9date_item{i}=0; ** 2:NO/DK OR -7:REFUSED  
  RECODED TO 0:NO/DK/RF**;  
  r9date_sum=sum(of r9date_item{*}); ** COUNT CORRECT DATE ITEMS**;  
  end;  
  
  if r9date_sum=. then do;  
  if cg9speaktosp=2 then r9date_sum=-2; ** PROXY SAYS CAN'T SPEAK TO SP **;  
  else if cg9speaktosp=1 and max(of cg9date{*})=-1 then r9date_sum=-3; ** PROXY  
  SAYS CAN SPEAK TO SP BUT SP UNABLE TO ANSWER **;  
  end;  
  r9date_sumr=r9date_sum;  
  if r9date_sum=-2 then r9date_sumr=.; ** MISSING IF PROXY SAYS CAN'T SPEAK TO  
  SP**;  
  else if r9date_sum=-3 then r9date_sumr=0; ** 0 IF SP UNABLE TO ANSWER **;  
  RUN;
```

```
** 6) PRESIDENT AND VICE PRESIDENT NAME ITEMS AND COUNT **;
```

```
DATA NHATSR9_SP (drop=i);  
  SET NHATSR9_SP;  
  array cg9pres {*} cg9presidna1 cg9presidna3 cg9vpname1 cg9vpname3;  
  array r9pres_item {*} r9preslast r9presfirst r9vpplast r9vpfirst;  
  
  do i=1 to dim(r9pres_item);  
  if cg9pres{i} > 0 then r9pres_item{i}=cg9pres{i}; ** CODE ONLY YES/NO  
  RESPONSES: MISSING/N.A. CODES -1,-9 LEFT MISSING **;  
  if cg9pres{i} in (-7,2) then r9pres_item{i}=0; ** 2:NO/DK OR -7:REFUSED  
  RECODED TO 0:NO/DK/RF **;  
  r9presvp=sum(of r9pres_item{*}); ** COUNT CORRECT PRESIDENT/VEEP NAME ITEMS  
  **;  
  end;  
  if r9presvp=. then do;  
  if cg9speaktosp=2 then r9presvp=-2; ** PROXY SAYS CAN'T SPEAK TO SP **;  
  else if cg9speaktosp=1 and max(of cg9pres{*})=-1 then r9presvp=-3; ** PROXY  
  SAYS CAN SPEAK TO SP BUT SP UNABLE TO ANSWER **;  
  end;  
  r9presvpr=r9presvp;  
  if r9presvp=-2 then r9presvpr=.; ** MISSING IF PROXY SAYS CAN'T SPEAK TO SP  
  **;
```

## SAS ALGORITHM FOR DEMENTIA

```
else if r9presvp=-3 then r9presvpr=0; ** 0 IF SP UNABLE TO ANSWER **;  
RUN;
```

```
** 7) ORIENTATION DOMAIN: SUM OF DATE RECALL AND PRESIDENT NAMING **;
```

```
DATA NHATSR9_SP;  
  SET NHATSR9_SP;  
  r9date_prvp=sum(r9date_sumr,r9presvpr);  
RUN;
```

```
TITLE;  
PROC PRINT DATA = NHATSR9_SP (OBS=50);  
  VAR r9date_sumr r9presvpr r9date_prvp;  
RUN;
```

```
** 8) EXECUTIVE FUNCTION DOMAIN: CLOCK DRAWING SCORE **;
```

```
DATA NHATSR9_SP;  
  SET NHATSR9_SP;  
  r9clock_scorer=cg9dclkdraw;  
  if cg9dclkdraw in (-2,-9) then r9clock_scorer=.;  
  if cg9dclkdraw in (-3,-4,-7) then r9clock_scorer=0;  
  ** IMPUTE MEAN SCORE TO PERSONS MISSING A CLOCK **;  
  if cg9dclkdraw=-9 and cg9speaktosp=1 then r9clock_scorer=2; ** IF PROXY SAID  
  CAN ASK SP **;  
  if cg9dclkdraw=-9 and cg9speaktosp=-1 then r9clock_scorer=3; ** IF SELF  
  RESPONDENT **;  
RUN;
```

```
TITLE;  
PROC PRINT DATA = NHATSR9_SP (OBS=50);  
  VAR cg9dclkdraw cg9speaktosp r9clock_scorer;  
RUN;
```

```
** 9) MEMORY DOMAIN: IMMEDIATE AND DELAYED WORD RECALL **;
```

```
DATA NHATSR9_SP (drop=i);  
  SET NHATSR9_SP;  
  array cg9recall {*} cg9dwrddimmrc cg9dwrddlyrc;  
  array r9word_recall {*} r9irecall r9drecall;  
  do i=1 to dim(r9word_recall);  
    r9word_recall{i}=cg9recall{i};  
    if cg9recall{i} in (-2,-1) then r9word_recall{i}=.;  
    if cg9recall{i} in (-7,-3) then r9word_recall{i}=0;  
    **SET CASES WITH MISSING WORD LIST AND NOT PREVIOUSLY ASSIGNED TO MISSING  
    (ROUND 5 ONLY)**;  
    *if cg5dwrddimmrc=-9 then r5word_recall{i}=.;  
  r9wordrecall10_20=sum(of r9word_recall{*});  
end;  
RUN;
```

## SAS ALGORITHM FOR DEMENTIA

```
TITLE;
PROC PRINT DATA = NHATSR9_SP (OBS = 50);
  VAR cg9dwrddimmrc cg9dwrddlyrc r9irecall r9drecall r9wordrecall10_20;
RUN;

** 10) CREATE COGNITIVE DOMAINS FOR ALL ELIGIBLE **;
** I.E. PROXY BUT PROXY SAYS CAN ASK SP, NOT FQ ONLY, NOT NH **;

DATA NHATSR9_SP;
  SET NHATSR9_SP;
  if 1 < r9clock_scorer <=5 then r9clock65=0;
  if 0 <= r9clock_scorer <=1 then r9clock65=1;
  if 3 < r9wordrecall10_20 <=20 then r9word65=0;
  if 0 <= r9wordrecall10_20 <=3 then r9word65=1;
  if 3 < r9date_prvp <= 8 then r9datena65=0;
  if 0 <= r9date_prvp <= 3 then r9datena65=1;
RUN;

TITLE;
PROC PRINT DATA = NHATSR9_SP (OBS=50);
  VAR r9clock_scorer r9clock65 r9wordrecall10_20 r9word65 r9date_prvp
  r9datena65;
RUN;

** 10) CREATE COGNITIVE DOMAIN SCORE **;

DATA NHATSR9_SP (drop=i);
  SET NHATSR9_SP;
  array r9domains {*} r9clock65 r9word65 r9datena65;
  do i=1 to dim(r9domains);
  r9domain65=sum(of r9domains{*});
  end;
  **SET CASES WITH MISSING WORD LIST AND NOT PREVIOUSLY ASSIGNED TO MISSING
  (ROUND 5 ONLY)**;
  *if cg5dwrddlstm=-9 and r5demclas=. then r5demclas=-9;

RUN;

TITLE;
PROC PRINT DATA = NHATSR9_SP (OBS=50);
  VAR r9clock65 r9word65 r9datena65 r9domain65;
RUN;

** 11) UPDATE COGNITIVE CLASSIFICATION **;

DATA NHATSR9_SP;
  SET NHATSR9_SP;
  if r9demclas=. and cg9speaktosp in (-1,1) then do;
  if 2 <= r9domain65 <=3 then r9demclas=1; ** PROBABLE DEMENTIA **;
  if r9domain65 =1 then r9demclas=2; ** POSSIBLE DEMENTIA **;
  if r9domain65 =0 then r9demclas=3; ** NO DEMENTIA **;
  end;
```

## SAS ALGORITHM FOR DEMENTIA

```
RUN;
```

```
TITLE;
```

```
PROC PRINT DATA = NHATSR9_SP (OBS=50);
```

```
  FORMAT r9demclas r9demclas.;
```

```
  VAR SPID cg9dwrddimrc cg9dwrddlyrc cg9dwrddimrc r9dresid hc9disescn9  
is9resptype cg9speaktosp r9domain65 r9demclas;
```

```
RUN;
```

```
TITLE;
```

```
PROC PRINT DATA = NHATSR9_SP (OBS=50);
```

```
  FORMAT r9demclas r9demclas.;
```

```
  VAR SPID r9demclas r9dresid r9dlmlint;
```

```
RUN;
```

```
TITLE;
```

```
PROC FREQ DATA = NHATSR9_SP ;
```

```
  TABLES r9dresid*r9dlmlint/LIST MISSING;
```

```
RUN;
```

```
TITLE;
```

```
PROC PRINT DATA = NHATSR9_SP;
```

```
  FORMAT r9demclas r9demclas.;
```

```
  WHERE r9dresid = 6 OR r9dlmlint = 1;
```

```
  VAR SPID r9demclas r9dresid r9dlmlint;
```

```
RUN;
```

```
DATA NHATSR9_SP;
```

```
  SET NHATSR9_SP;
```

```
  DROP r9ad8_dem r9ad8_1-r9ad8_8 r9ad8miss_1-r9ad8miss_8 r9ad8_score  
r9ad8_miss
```

```
  r9date_mon r9date_day r9date_yr r9date_dow r9date_sum r9date_sumr
```

```
  r9preslast r9presfirst r9vplast r9vpfirst r9presvp r9presvpr r9date_prvp
```

```
  r9clock_scorer r9irecall r9drecall r9wordrecall10_20
```

```
  r9clock65 r9word65 r9datena65 r9domain65;
```

```
RUN;
```

```
/*Sort NHATS and NSOC data sets */
```

```
PROC SORT DATA = NHATSR1_OP;
```

```
  BY SPID OPID;
```

```
RUN;
```

```
PROC SORT DATA = NHATSR1_SP;
```

```
  BY SPID;
```

```
RUN;
```

## SAS ALGORITHM FOR DEMENTIA

```
PROC SORT DATA = NHATSR2_OP;  
  BY SPID OPID;  
RUN;
```

```
PROC SORT DATA = NHATSR2_SP;  
  BY SPID;  
RUN;
```

```
PROC SORT DATA = NHATSR3_OP;  
  BY SPID OPID;  
RUN;
```

```
PROC SORT DATA = NHATSR3_SP;  
  BY SPID;  
RUN;
```

```
PROC SORT DATA = NHATSR4_OP;  
  BY SPID OPID;  
RUN;
```

```
PROC SORT DATA = NHATSR4_SP;  
  BY SPID;  
RUN;
```

```
PROC SORT DATA = NHATSR5_OP;  
  BY SPID OPID;  
RUN;
```

```
PROC SORT DATA = NHATSR5_SP;  
  BY SPID;  
RUN;
```

```
PROC SORT DATA = NHATSR6_OP;  
  BY SPID OPID;  
RUN;
```

```
PROC SORT DATA = NHATSR6_SP;  
  BY SPID;  
RUN;
```

```
PROC SORT DATA = NHATSR7_OP;  
  BY SPID OPID;  
RUN;
```

## SAS ALGORITHM FOR DEMENTIA

```
PROC SORT DATA = NHATSR7_SP;  
  BY SPID;  
RUN;
```

```
PROC SORT DATA = NHATSR8_OP;  
  BY SPID OPID;  
RUN;
```

```
PROC SORT DATA = NHATSR8_SP;  
  BY SPID;  
RUN;
```

```
PROC SORT DATA = NHATSR9_OP;  
  BY SPID OPID;  
RUN;
```

```
PROC SORT DATA = NHATSR9_SP;  
  BY SPID;  
RUN;
```

```
PROC SORT DATA = NSOCR1;  
  BY SPID OPID;  
RUN;
```

```
PROC SORT DATA = NSOCR5;  
  BY SPID OPID;  
RUN;
```

```
PROC SORT DATA = NSOCR7;  
  BY SPID OPID;  
RUN;
```

```
PROC SORT DATA = NSSDR1_OP;  
  BY SPID OPID;  
RUN;
```

```
PROC SORT DATA = NSSDR1_SP;  
  BY SPID;  
RUN;
```

```
PROC SORT DATA = NSSDR2_OP;  
  BY SPID OPID;  
RUN;
```

```
PROC SORT DATA = NSSDR2_SP;  
  BY SPID;  
RUN;
```



## SAS ALGORITHM FOR DEMENTIA

```
PROC SORT DATA = NSSDR3_OP;  
  BY SPID OPID;  
RUN;
```

```
PROC SORT DATA = NSSDR3_SP;  
  BY SPID;  
RUN;
```

```
PROC SORT DATA = NSSDR4_OP;  
  BY SPID OPID;  
RUN;
```

```
PROC SORT DATA = NSSDR4_SP;  
  BY SPID;  
RUN;
```

```
PROC SORT DATA = NSSDR5_OP;  
  BY SPID OPID;  
RUN;
```

```
PROC SORT DATA = NSSDR5_SP;  
  BY SPID;  
RUN;
```

```
PROC SORT DATA = NSSDR6_OP;  
  BY SPID OPID;  
RUN;
```

```
PROC SORT DATA = NSSDR6_SP;  
  BY SPID;  
RUN;
```

```
PROC SORT DATA = NSSDR7_OP;  
  BY SPID OPID;  
RUN;
```

```
PROC SORT DATA = NSSDR7_SP;  
  BY SPID;  
RUN;
```

```
PROC SORT DATA = NSSDR8_OP;  
  BY SPID OPID;  
RUN;
```

## SAS ALGORITHM FOR DEMENTIA

```
PROC SORT DATA = NSSDR8_SP;  
  BY SPID;  
RUN;
```

```
PROC SORT DATA = NSSDR9_OP;  
  BY SPID OPID;  
RUN;
```

```
PROC SORT DATA = NSSDR9_SP;  
  BY SPID;  
RUN;
```

```
DATA NHATS_SP_R1_R9;  
  MERGE  
    NHATSR1_SP NHATSR2_SP NHATSR3_SP NHATSR4_SP NHATSR5_SP NHATSR6_SP  
    NHATSR7_SP NHATSR8_SP NHATSR9_SP  
    NHATSR1_OP NHATSR2_OP NHATSR3_OP NHATSR4_OP NHATSR5_OP NHATSR6_OP  
    NHATSR7_OP NHATSR8_OP NHATSR9_OP  
    NSSDR1_OP NSSDR2_OP NSSDR3_OP NSSDR4_OP NSSDR5_OP NSSDR6_OP NSSDR7_OP  
    NSSDR8_OP NSSDR9_OP  
    NSSDR1_SP NSSDR2_SP NSSDR3_SP NSSDR4_SP NSSDR5_SP NSSDR6_SP NSSDR7_SP  
    NSSDR8_SP NSSDR9_SP ;  
  BY SPID;  
RUN;
```

```
DATA NSOCR1;  
  SET NSOCR1;  
  OPIDR1=OPID;  
RUN;
```

```
DATA NSOCR5;  
  SET NSOCR5;  
  OPIDR5=OPID;  
RUN;
```

```
DATA NSOCR7;  
  SET NSOCR7;  
  OPIDR7=OPID;  
RUN;
```

```
DATA NSOC_R1_R5_R7;  
  MERGE NSOCR1 NSOCR5 NSOCR7;  
  BY SPID OPID;  
RUN;
```

```
DATA NSOC_R1_R5_R7 (drop=i);;
```

## SAS ALGORITHM FOR DEMENTIA

```
SET NSOC_R1_R5_R7;
array OPID_call{*} OPIDR1 OPIDR5 OPIDR7;
array OPID_count{*} OPIDR1 OPIDR5 OPIDR7;
DO i = 1 to dim(OPID_call);
  OPID_count{i} = OPID_call{i};
  IF OPID_call{i} ^= . THEN OPID_count{i} = 1; /* meaning interviewed */
  IF OPID_call{i} = . THEN OPID_count{i} = 0;
  OPID_count_sum = sum(of OPID_count{*});
END;
cdchlphrsdy_sum= sum(cdc1hlphrsdy, cdc5hlphrsdy, cdc7hlphrsdy);
OPID_count_cdchlphrsdy_sum=sum(OPID_count_sum,cdchlphrsdy_sum);
RUN;
```

```
PROC SORT DATA=NSOC_R1_R5_R7 OUT=NSOC_R1_R5_R7;
  BY SPID OPID_count_sum cdchlphrsdy_sum;
RUN;
```

```
TITLE;
PROC PRINT DATA=NSOC_R1_R5_R7 (OBS=50);
  VAR SPID OPID OPID_count_sum cdchlphrsdy_sum
  OPID_count_cdchlphrsdy_sum;
RUN;
```

```
/* Merge NHATS R1 - R9 dementia classification data sets */
```

```
PROC FORMAT;
value FLstatus
  0="0:Alive"
  1="1:Died";
value LML
  0="0:No"
  1="1:Yes";
RUN;
```

```
DATA NHATS_SP_R1_R9;
  SET NHATS_SP_R1_R9;
  IF (r1dresid^=6) AND (r2dresid=. AND r2dlmlint=.) AND (r3dresid=. AND
r3dlmlint=.) AND (r4dresid=. AND r4dlmlint=.)
    AND (r5dresid=. AND r5dlmlint=.) AND (r6dresid=. AND r6dlmlint=.) AND
(r7dresid=. AND r7dlmlint=.) AND (r8dresid=. AND r8dlmlint=.)
    AND (r9dresid=. AND r9dlmlint=.) THEN FLdemclas = r1demclas;

  IF (r1dresid^=6) AND (r2dresid=6 OR r2dlmlint=1) AND (r3dresid=. AND
r3dlmlint=.) AND (r4dresid=. AND r4dlmlint=.)
    AND (r5dresid=. AND r5dlmlint=.) AND (r6dresid=. AND r6dlmlint=.) AND
(r7dresid=. AND r7dlmlint=.) AND (r8dresid=. AND r8dlmlint=.)
    AND (r9dresid=. AND r9dlmlint=.) THEN FLdemclas = r1demclas;
  IF (r1dresid^=6) AND (r2dresid^=. AND r2dlmlint^=.) AND (r2dresid^=6 AND
r2dlmlint^=1) AND (r3dresid=. AND r3dlmlint=.) AND (r4dresid=. AND
r4dlmlint=.)
    AND (r5dresid=. AND r5dlmlint=.) AND (r6dresid=. AND r6dlmlint=.) AND
(r7dresid=. AND r7dlmlint=.) AND (r8dresid=. AND r8dlmlint=.)
    AND (r9dresid=. AND r9dlmlint=.) THEN FLdemclas = r2demclas;
```



## SAS ALGORITHM FOR DEMENTIA

```
    AND (r8dresid=. AND r8dlmlint=.) AND (r9dresid=. AND r9dlmlint=.) THEN
FLdemclas = r7demclas;

IF (r1dresid^=6) AND (r2dresid^=6 AND r2dlmlint^=1) AND (r3dresid^=6 AND
r3dlmlint^=1) AND (r4dresid^=6 AND r4dlmlint^=1)
    AND (r5dresid^=6 AND r5dlmlint^=1) AND (r6dresid^=6 AND r6dlmlint^=1) AND
(r7dresid^=6 AND r7dlmlint^=1)
    AND (r8dresid=6 OR r8dlmlint=1) AND (r9dresid=. AND r9dlmlint=.) THEN
FLdemclas = r7demclas;
IF (r1dresid^=6) AND (r2dresid^=6 AND r2dlmlint^=1) AND (r3dresid^=6 AND
r3dlmlint^=1) AND (r4dresid^=6 AND r4dlmlint^=1)
    AND (r5dresid^=6 AND r5dlmlint^=1) AND (r6dresid^=6 AND r6dlmlint^=1) AND
(r7dresid^=6 AND r7dlmlint^=1) AND (r8dresid=. AND r8dlmlint=.)
    AND (r8dresid^=6 AND r8dlmlint^=1) AND (r9dresid=. AND r9dlmlint=.) THEN
FLdemclas = r8demclas;

IF (r1dresid^=6) AND (r2dresid^=6 AND r2dlmlint^=1) AND (r3dresid^=6 AND
r3dlmlint^=1) AND (r4dresid^=6 AND r4dlmlint^=1)
    AND (r5dresid^=6 AND r5dlmlint^=1) AND (r6dresid^=6 AND r6dlmlint^=1) AND
(r7dresid^=6 AND r7dlmlint^=1) AND (r8dresid^=6 AND r8dlmlint^=1)
    AND (r9dresid=6 OR r9dlmlint=1) THEN FLdemclas = r8demclas;
IF (r1dresid^=6) AND (r2dresid^=6 AND r2dlmlint^=1) AND (r3dresid^=6 AND
r3dlmlint^=1) AND (r4dresid^=6 AND r4dlmlint^=1)
    AND (r5dresid^=6 AND r5dlmlint^=1) AND (r6dresid^=6 AND r6dlmlint^=1) AND
(r7dresid^=6 AND r7dlmlint^=1) AND (r8dresid^=6 AND r8dlmlint^=1)
    AND (r9dresid^=. OR r9dlmlint^=.) AND (r9dresid^=6 OR r9dlmlint^=1) THEN
FLdemclas = r9demclas;

    FLstatus = 0;
    IF (r1dresid=6) OR (r2dresid=6 OR r2dlmlint=1) OR (r3dresid=6 OR
r3dlmlint=1) OR (r4dresid=6 OR r4dlmlint=1) OR (r5dresid=6 OR r5dlmlint=1)
        OR (r6dresid=6 OR r6dlmlint=1) OR (r7dresid=6 OR r7dlmlint=1) OR
(r8dresid=6 OR r8dlmlint=1) OR (r9dresid=6 OR r9dlmlint=1) THEN
        FLstatus = 1;

    LML = 0;
    IF (r1dresid=6) OR (r2dresid=6 OR r2dlmlint=1) OR (r3dresid=6 OR
r3dlmlint=1) OR (r4dresid=6 OR r4dlmlint=1) OR (r5dresid=6 OR r5dlmlint=1)
        OR (r6dresid=6 OR r6dlmlint=1) OR (r7dresid=6 OR r7dlmlint=1) OR
(r8dresid=6 OR r8dlmlint=1) OR (r9dresid=6 OR r9dlmlint=1) THEN
        LML = 1;
    LABEL FLdemclas="Dementia Class";
    LABEL FLstatus="Alive or Died";
    LABEL LML="Last month of life interview";
    RUN;

/*Merge NHATS R1-R9 dementia classification data sets and NSOC data sets */

DATA NHATSNSOC;
    MERGE NSOC_R1_R5_R7 NHATS_SP_R1_R9;
    BY SPID;
    RUN;

DATA NHATSNSOC;
    SET NHATSNSOC;
```

## SAS ALGORITHM FOR DEMENTIA

```
Cluster = 2;  
IF SPID <= 10012411 THEN Cluster = 1;  
RUN;
```

```
DATA NSOC_R1_R5_R7_1;  
SET NSOC_R1_R5_R7;  
BY SPID;  
IF LAST.SPID;  
OPID_interview = OPID;  
DROP OPIDR1 OPIDR5 OPIDR7;  
RUN;
```

```
TITLE;  
PROC PRINT DATA=NSOC_R1_R5_R7_1 (OBS=50);  
VAR SPID OPID OPID_interview OPID_count_sum cdchlphrsdy_sum  
OPID_count_cdchlphrsdy_sum;  
RUN;
```

```
PROC SORT DATA = NHATS_SP_R1_R9 OUT=NHATS_SP_R1_R9_1;  
BY SPID;  
RUN;
```

```
DATA NHATSNSOC_new;  
MERGE NSOC_R1_R5_R7_1 NHATS_SP_R1_R9_1;  
BY SPID;  
RUN;
```

```
DATA NHATSNSOC_new;  
SET NHATSNSOC_new;  
Cluster = 2;  
IF SPID <= 10012411 THEN Cluster = 1;  
RUN;
```

```
DATA NHATSNSOC_clean_061521;  
SET NHATSNSOC_new;  
IF OPID = OPID_interview AND OPID ^= " " AND OPID_interview ^= .;  
RUN;
```

```
PROC PRINT DATA = NHATSNSOC_clean_061521 (OBS=200);  
VAR SPID OPID OPID_interview FLdemclas FLstatus LML Cluster ;  
RUN;
```

```
proc export data= NHATSNSOC_clean_061521  
outfile= "C:\UB\Projects\2019\Suzanne Sullivan\R03 project\Analysis 6-15-  
21\NHATSNSOC_clean_061521.sav";  
run;
```
